# Supplementary material for: LipidCreator workbench to probe the lipidomic landscape
Source: PubMed Central journal article supplement (PMC7188904; doi:10.1038/s41467-020-15960-z), 2020-04-28
Supplement: 41467_2020_15960_MOESM8_ESM.pdf [file 41467_2020_15960_MOESM8_ESM.pdf]

# Supplementary Data 5 - Modeling Results for the Thermo Q Exactive HF [MS:1002523] platform for:

## LipidCreator workbench to probe the lipidomic landscape

Bing Peng<sup>1,2, #</sup>, Dominik Kopczynski<sup>1,#</sup>, Brian S Pratt<sup>3</sup>, Christer S Ejsing<sup>4,5</sup>, Bo Burla<sup>6</sup>, Martin Hermansson<sup>4,7</sup>, Peter Imre Benke<sup>8</sup>, Sock Hwee Tan<sup>9,10</sup>, Mark Y Chan<sup>9,10,11</sup>, Federico Torta<sup>8</sup>, Dominik Schwudke<sup>12,13,14</sup>, Sven Meckelmann<sup>15</sup>, Cristina Coman<sup>1,17</sup>, Oliver J Schmitz<sup>15</sup>, Brendan MacLean<sup>3</sup>, Mailin-Christin Manke<sup>16</sup>, Oliver Borst<sup>16</sup>, Markus R Wenk<sup>6,8</sup>, Nils Hoffmann<sup>1</sup>, Robert Ahrends<sup>1,17,\*</sup>

<sup>1</sup> Leibniz-Institut für Analytische Wissenschaften – ISAS - e.V., 44139 Dortmund, Germany

<sup>2</sup> Division of Rheumatology, Department of Medicine Solna, Karolinska Institutet, Karolinska University Hospital, SE-171 76 Stockholm, Sweden

<sup>3</sup> University of Washington, Department of Genome Sciences, WA 98195 Seattle, USA

<sup>4</sup> Department of Biochemistry and Molecular Biology, University of Southern Denmark, DK-5230 Odense, Denmark

<sup>5</sup> Cell Biology and Biophysics Unit, European Molecular Biology Laboratory, 69117 Heidelberg, Germany

<sup>6</sup> Singapore Lipidomics Incubator (SLING), Life Science Institute, National University of Singapore, 117456 Singapore, Singapore

<sup>7</sup> Wihuri Research Institute, 00290 Helsinki, Finland

<sup>8</sup> Singapore Lipidomics Incubator (SLING), Department of Biochemistry, Yong Loo Lin School of Medicine, National University of Singapore, 117596 Singapore, Singapore

<sup>9</sup> Department of Medicine, Yong Loo Lin School of Medicine, National University Hospital, 119228 Singapore, Singapore

<sup>10</sup> Cardiovascular Research Institute, National University of Singapore, 117599 Singapore, Singapore

<sup>11</sup> National University Heart Centre, National University Health System, 117599 Singapore, Singapore

<sup>12</sup> Research Center Borstel, Leibniz Lung Center, Borstel, Germany

<sup>13</sup> German Center for Infection Research (DZIF), 38124 Braunschweig, Germany

<sup>14</sup> Airway Research Center North Member of the German Center for Lung Research (DZL), 22927 Großhansdorf, Germany

<sup>15</sup> Institute of Applied Analytical Chemistry, University of Duisburg-Essen, 45141 Essen, Germany

<sup>16</sup> Department of Cardiology and Cardiovascular Medicine, University of Tübingen, 72076 Tübingen, Germany

<sup>17</sup> Department of Analytical Chemistry, University of Vienna, Währinger Strasse 38, 1090 Vienna, Austria

# Two authors contributed equally to this work

\* Corresponding author

# Table of Contents

|                                                 |     |
|-------------------------------------------------|-----|
| 1. Thermo Scientific Q Exactive HF [MS:1002523] | 2   |
| 1.1. 10-HDoHE [M-H]1- 0001269                   | 2   |
| 1.2. 11(12)-EET{d11} [M-H]1- 0001307            | 5   |
| 1.3. 11,12-DHET{d11} [M-H]1- 0000157            | 8   |
| 1.4. 11-HDoHE [M-H]1- 0001275                   | 11  |
| 1.5. 11-HETE [M-H]1- 0001289                    | 14  |
| 1.6. 12(13)-EpOME{d4} [M-H]1- 0001303           | 17  |
| 1.7. 12-HEPE [M-H]1- 0001281                    | 20  |
| 1.8. 12-HETE{d8} [M-H]1- 0001295                | 23  |
| 1.9. 12-HHTrE [M-H]1- 0001347                   | 26  |
| 1.10. 12-OxoETE [M-H]1- 0001283                 | 29  |
| 1.11. 13-HODE{d4} [M-H]1- 0001277               | 32  |
| 1.12. 13-HOTrE [M-H]1- 0001341                  | 35  |
| 1.13. 14(15)-EET{d11} [M-H]1- 0001305           | 38  |
| 1.14. 14(15)-EpETE [M-H]1- 0001285              | 41  |
| 1.15. 14,15-DHET{d11} [M-H]1- 0000155           | 44  |
| 1.16. 15-HEPE [M-H]1- 0000139                   | 47  |
| 1.17. 15-HETE{d8} [M-H]1- 0001329               | 50  |
| 1.18. 15d-PGJ2{d4} [M-H]1- 0000149              | 53  |
| 1.19. 16-HDoHE [M-H]1- 0001271                  | 56  |
| 1.20. 18-HEPE [M-H]1- 0000131                   | 59  |
| 1.21. 5(6)-EET{d11} [M-H]1- 0000161             | 62  |
| 1.22. 5,12-DiHETE [M-H]1- 0001299               | 65  |
| 1.23. 5,6-DiHETE [M-H]1- 0001301                | 68  |
| 1.24. 5-HEPE [M-H]1- 0000133                    | 71  |
| 1.25. 5-HETE{d8} [M-H]1- 0000145                | 74  |
| 1.26. 5-HpETE [M-H]1- 0001297                   | 77  |
| 1.27. 5-OxoETE{d7} [M-H]1- 0000147              | 80  |
| 1.28. 8(9)-EET{d11} [M-H]1- 0001309             | 83  |
| 1.29. 8,9-DHET{d11} [M-H]1- 0000159             | 86  |
| 1.30. 8-HDoHE [M-H]1- 0001273                   | 89  |
| 1.31. 8-HETE [M-H]1- 0001287                    | 92  |
| 1.32. 9(10)-EpOME{d4} [M-H]1- 0001355           | 95  |
| 1.33. 9-HEPE [M-H]1- 0001279                    | 98  |
| 1.34. 9-HETE [M-H]1- 0001291                    | 101 |
| 1.35. 9-HODE [M-H]1- 0001339                    | 104 |
| 1.36. 9-HOTrE [M-H]1- 0000137                   | 107 |
| 1.37. AA{d8} [M-H]1- 0001337                    | 110 |
| 1.38. DHA{d5} [M-H]1- 0001353                   | 113 |
| 1.39. EPA{d5} [M-H]1- 0001335                   | 116 |
| 1.40. LTB4{d4} [M-H]1- 0001331                  | 119 |



|                                        |     |
|----------------------------------------|-----|
| 1.41. LTC4{d5} [M-H]1- 0000163         | 122 |
| 1.42. LTD4{d5} [M-H]1- 0000153         | 125 |
| 1.43. Maresin 1 [M-H]1- 0001319        | 128 |
| 1.44. PGB2{d4} [M-H]1- 0000151         | 131 |
| 1.45. PGD2{d4} [M-H]1- 0001311         | 134 |
| 1.46. PGE2{d4} [M-H]1- 0001313         | 137 |
| 1.47. PGE2{d9} [M-H]1- 0001321         | 140 |
| 1.48. PGF2alpha{d4} [M-H]1- 0000125    | 143 |
| 1.49. PGI2 [M-H]1- 0000127             | 146 |
| 1.50. Resolvin D1{d5} [M-H]1- 0001333  | 149 |
| 1.51. Resolvin D2{d5} [M-H]1- 0000129  | 152 |
| 1.52. Resolvin D3 [M-H]1- 0000141      | 155 |
| 1.53. Resolvin D5 [M-H]1- 0000143      | 158 |
| 1.54. TXB1 [M-H]1- 0001325             | 161 |
| 1.55. TXB2{d4} [M-H]1- 0001327         | 164 |
| 1.56. TXB3 [M-H]1- 0001323             | 167 |
| 1.57. alpha-LA{d14} [M-H]1- 0000135    | 170 |
| 1.58. tetranor-12-HETE [M-H]1- 0001351 | 173 |

## 1. Thermo Scientific Q Exactive HF [MS:1002523]

### 1.1. 10-HDoHE [M-H]1- 0001269

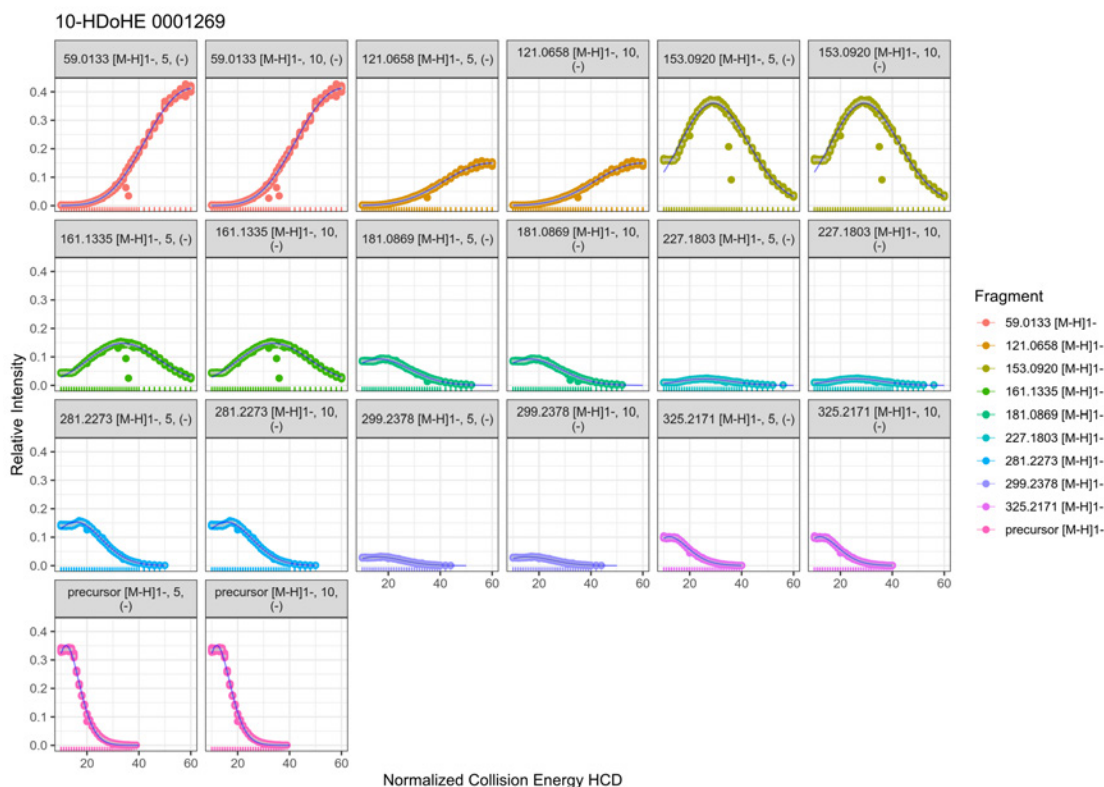

Figure 1. Nonlinear fit

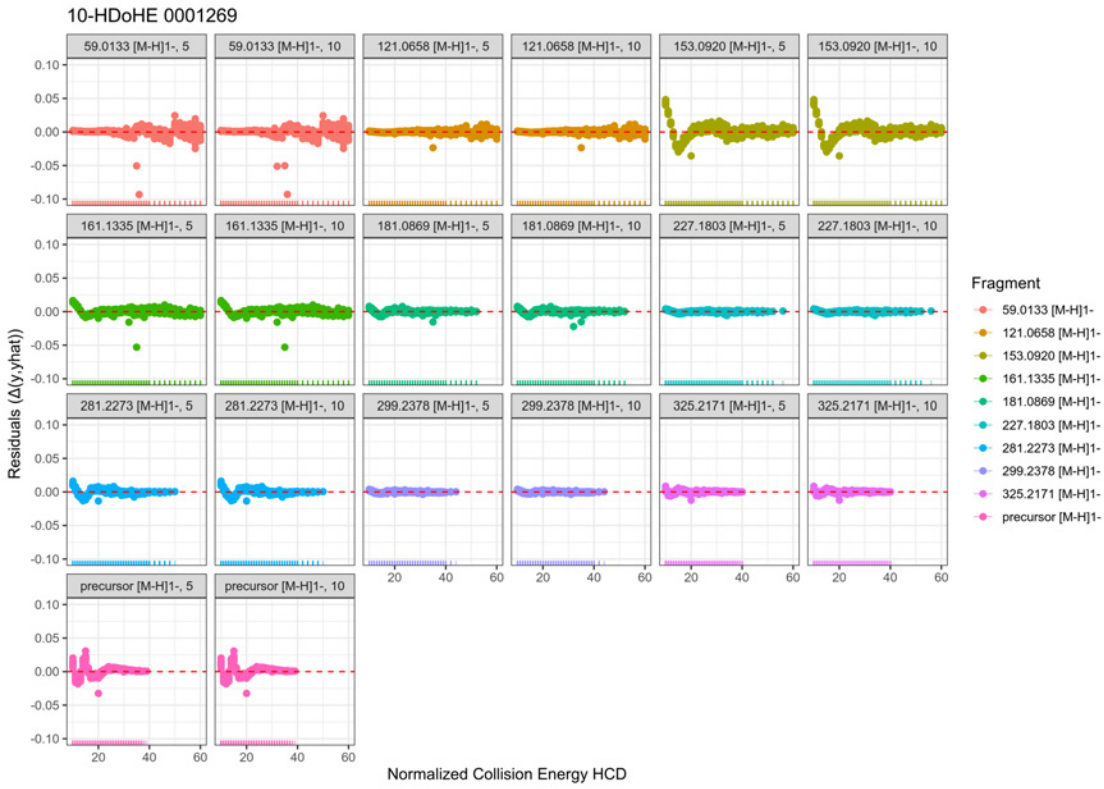

Figure 2. Residuals of nonlinear fit

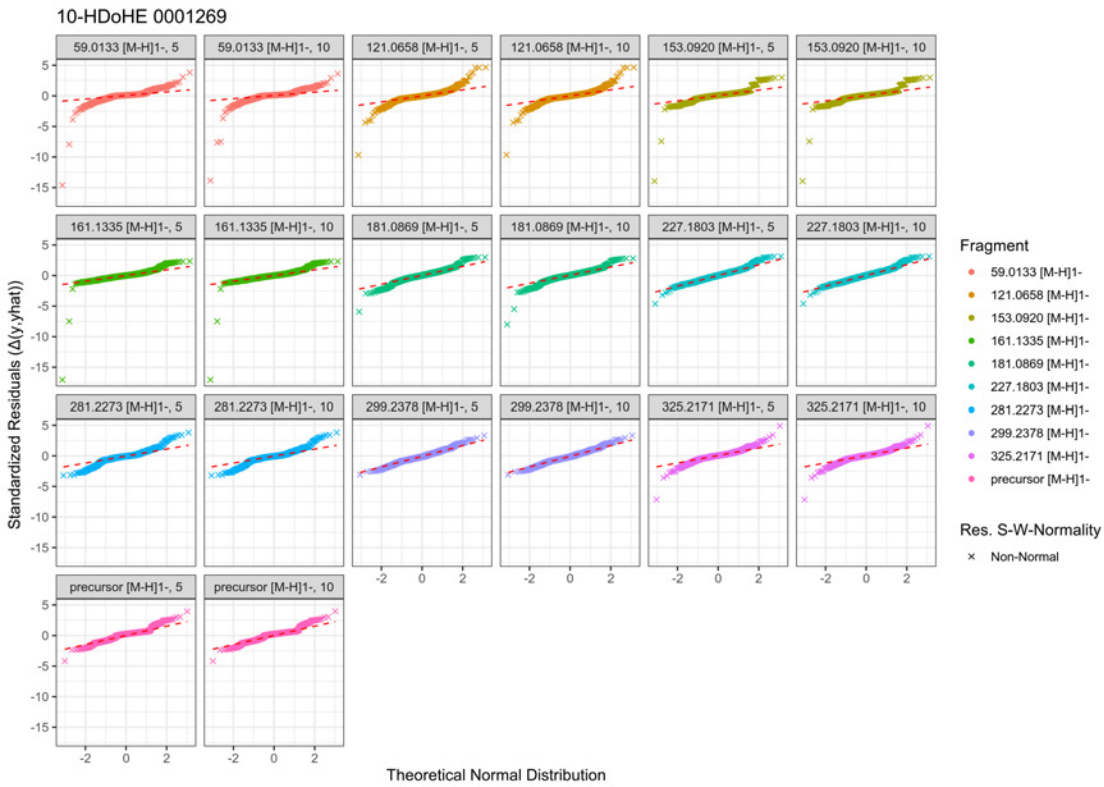

Figure 3. Quantile-quantile plot of residuals

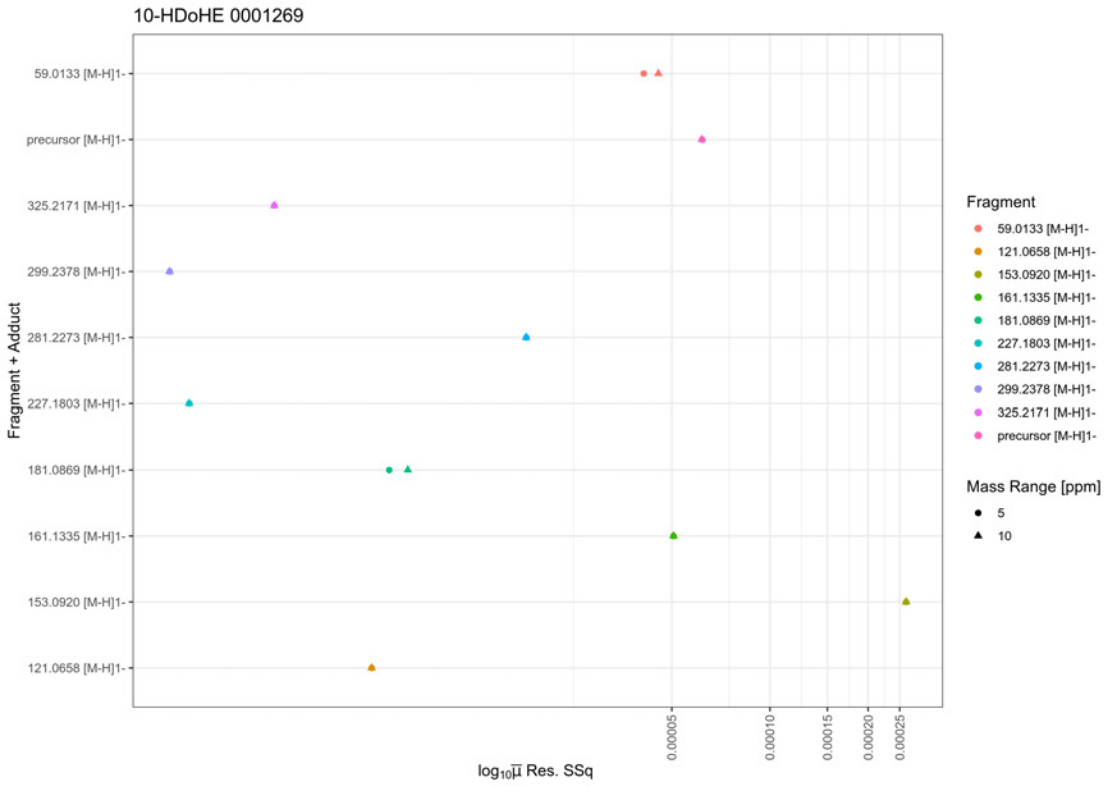

Figure 4. Normalized sum-of-squares of the residuals

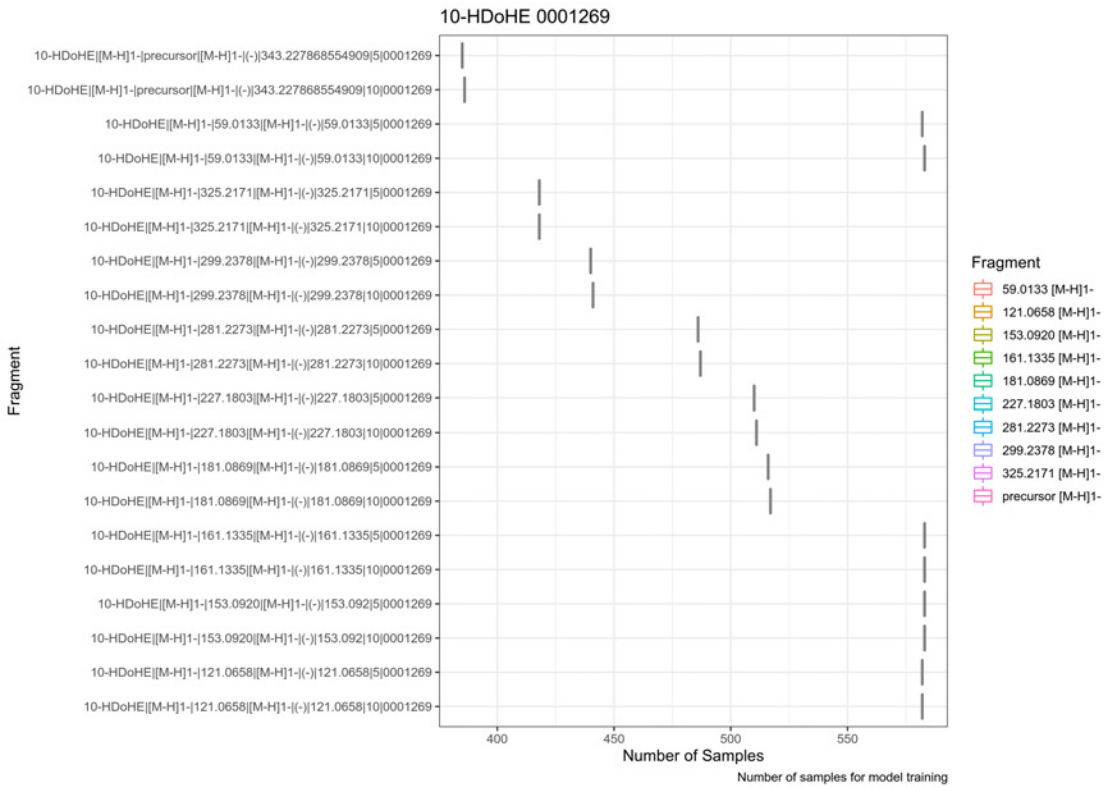

Figure 5. Number of samples used for training per combination Id

## 1.2. 11(12)-EET{d11} [M-H]1- 0001307

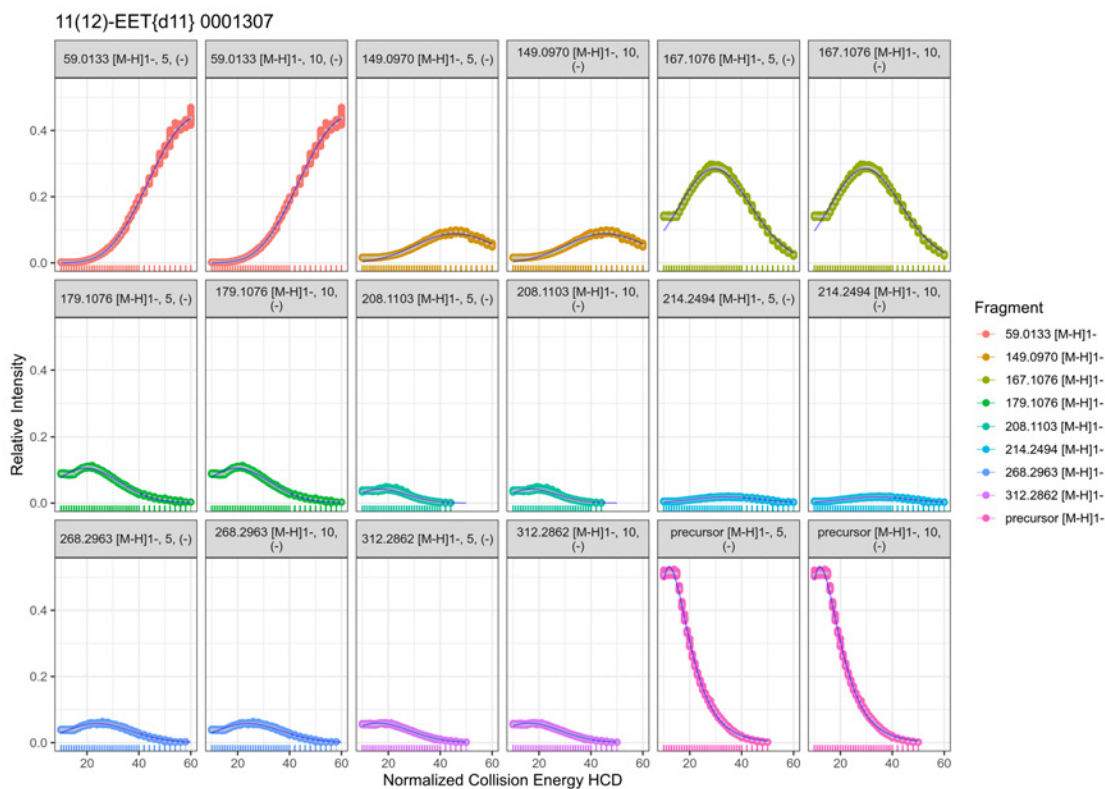

Figure 6. Nonlinear fit

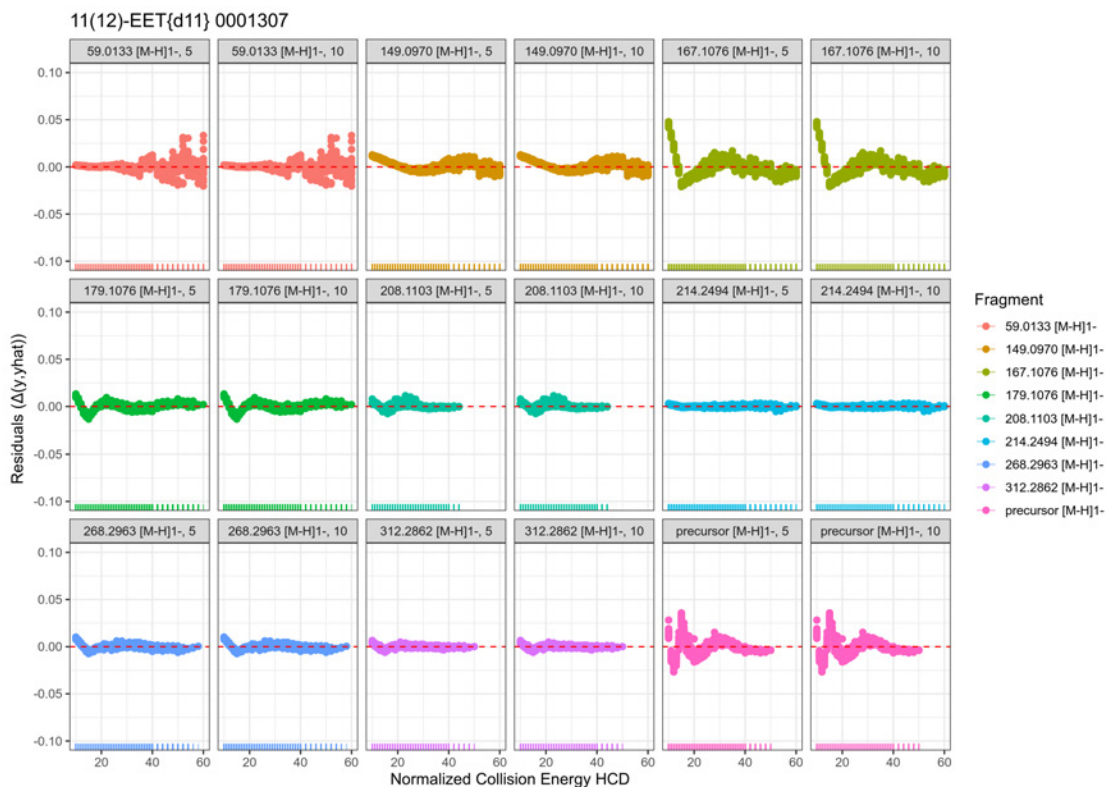

Figure 7. Residuals of nonlinear fit

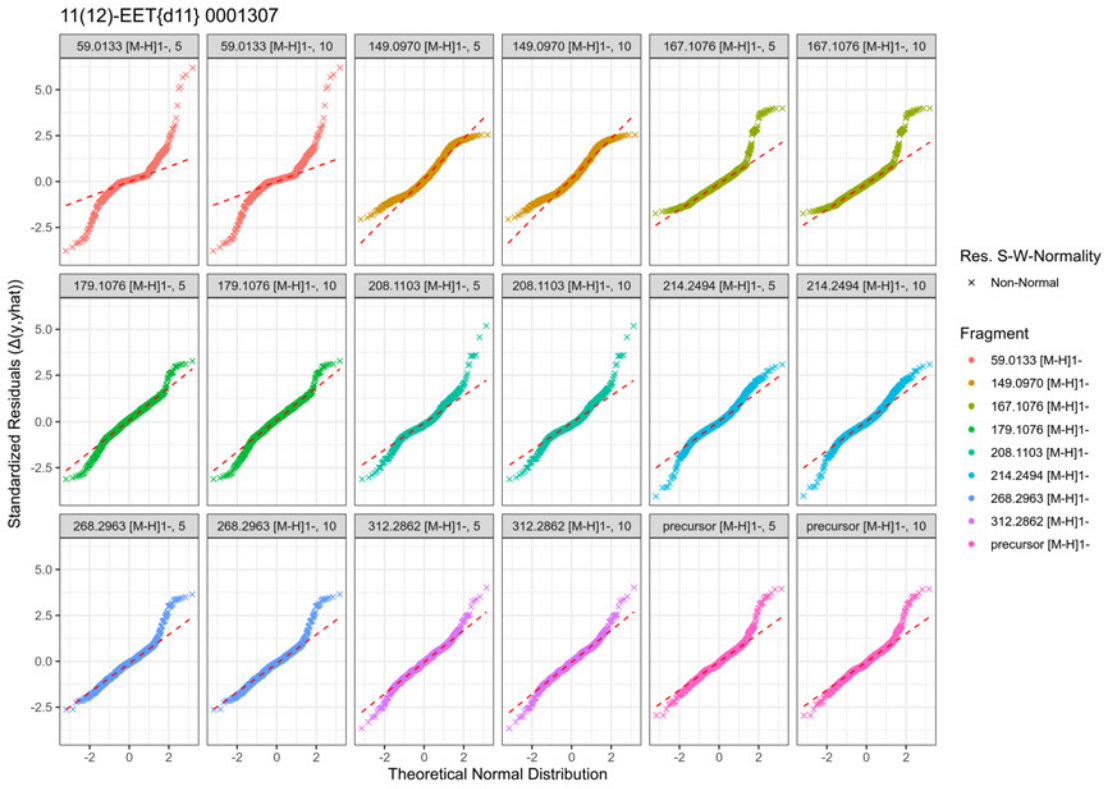

Figure 8. Quantile-quantile plot of residuals

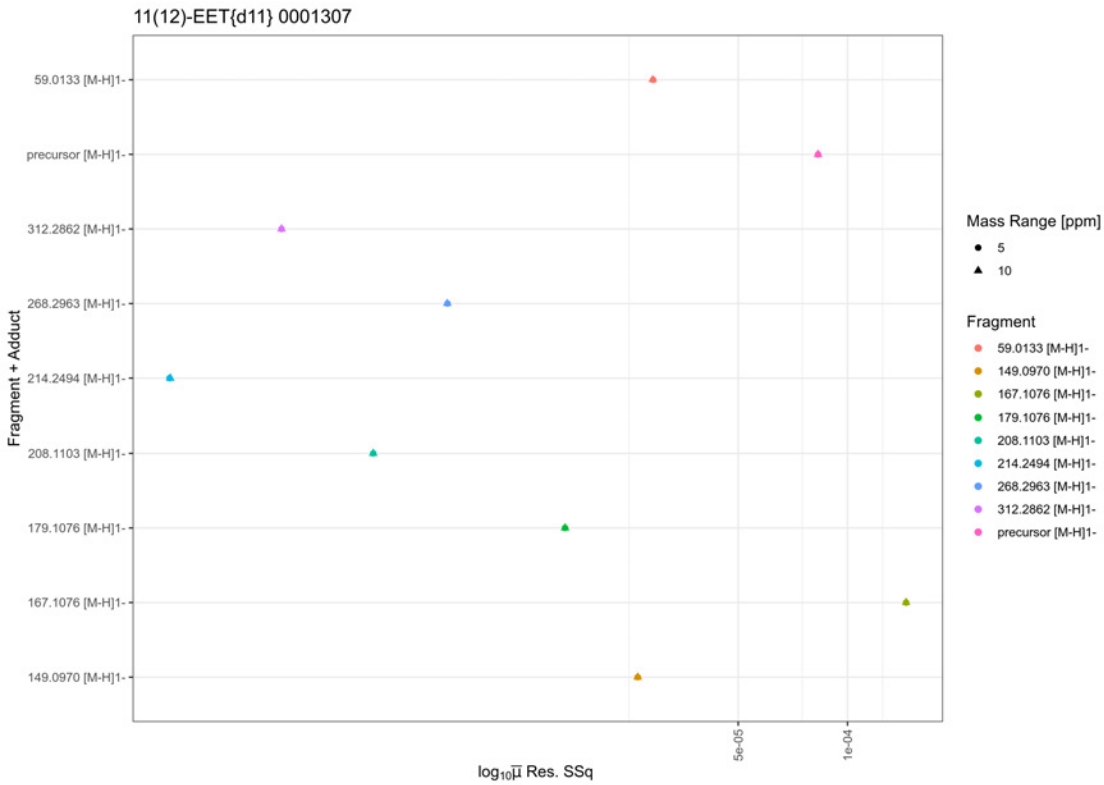

Figure 9. Normalized sum-of-squares of the residuals

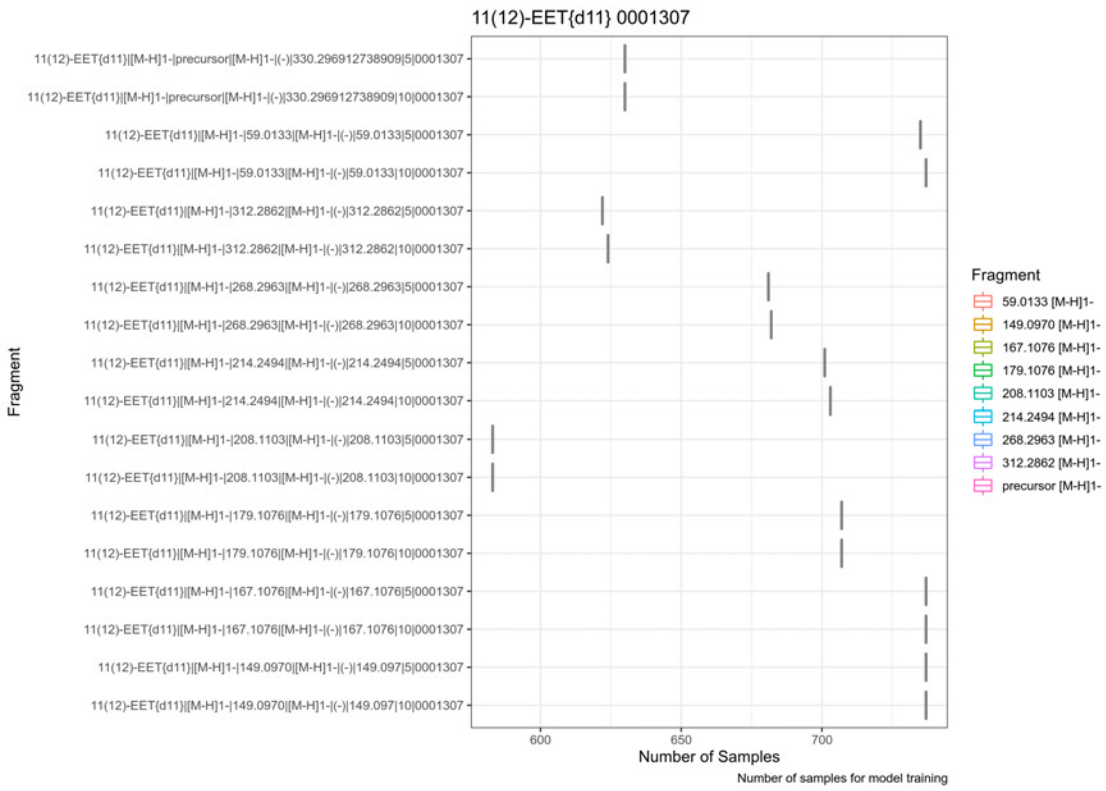

Figure 10. Number of samples used for training per combination Id



### 1.3. 11,12-DHET{d11} [M-H]1- 0000157

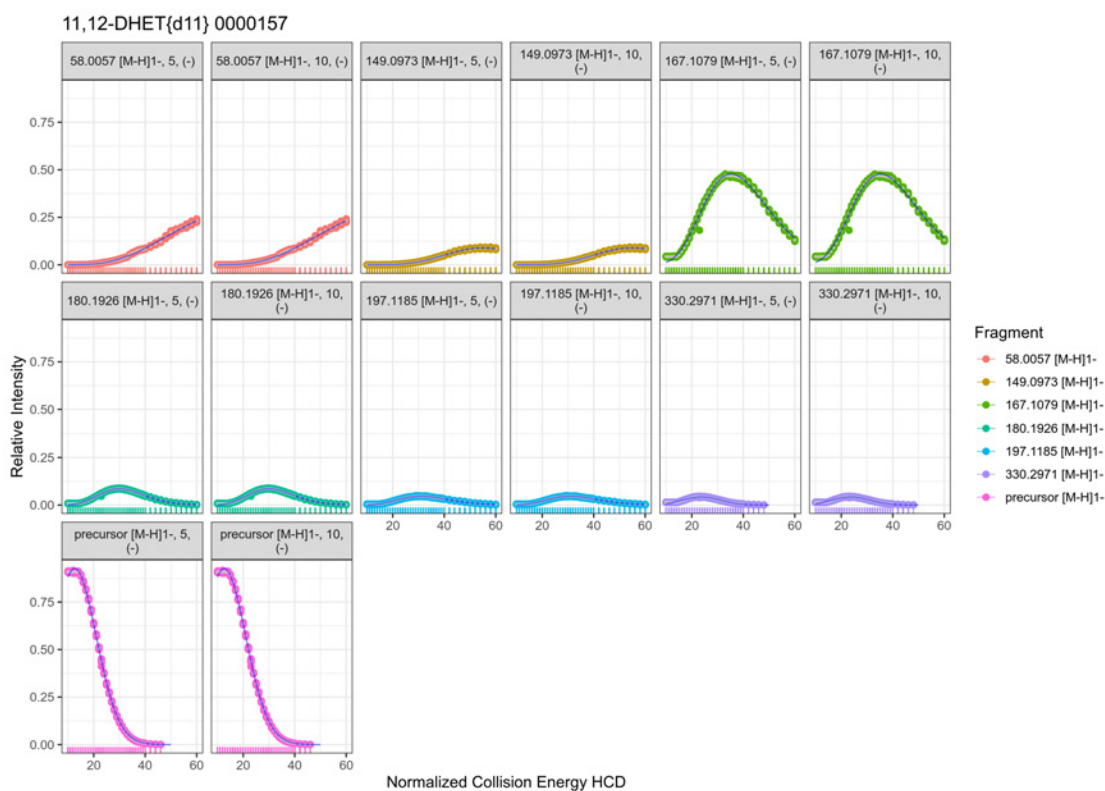

Figure 11. Nonlinear fit

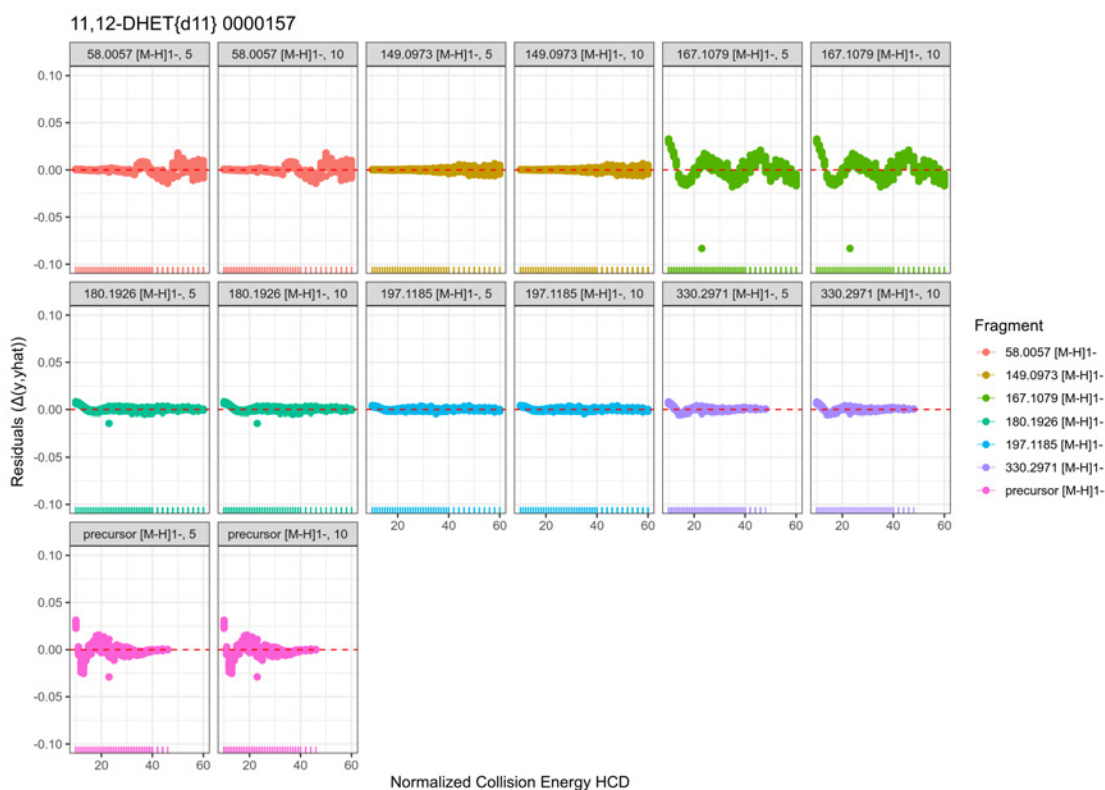

Figure 12. Residuals of nonlinear fit

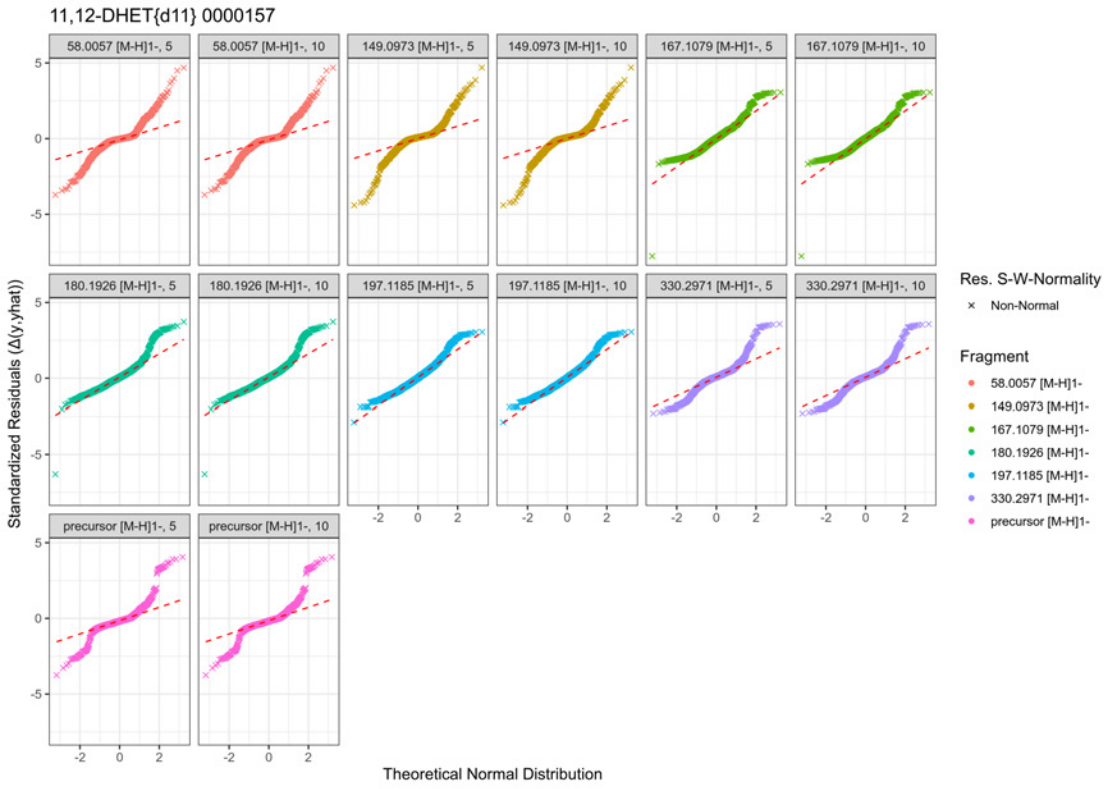

Figure 13. Quantile-quantile plot of residuals

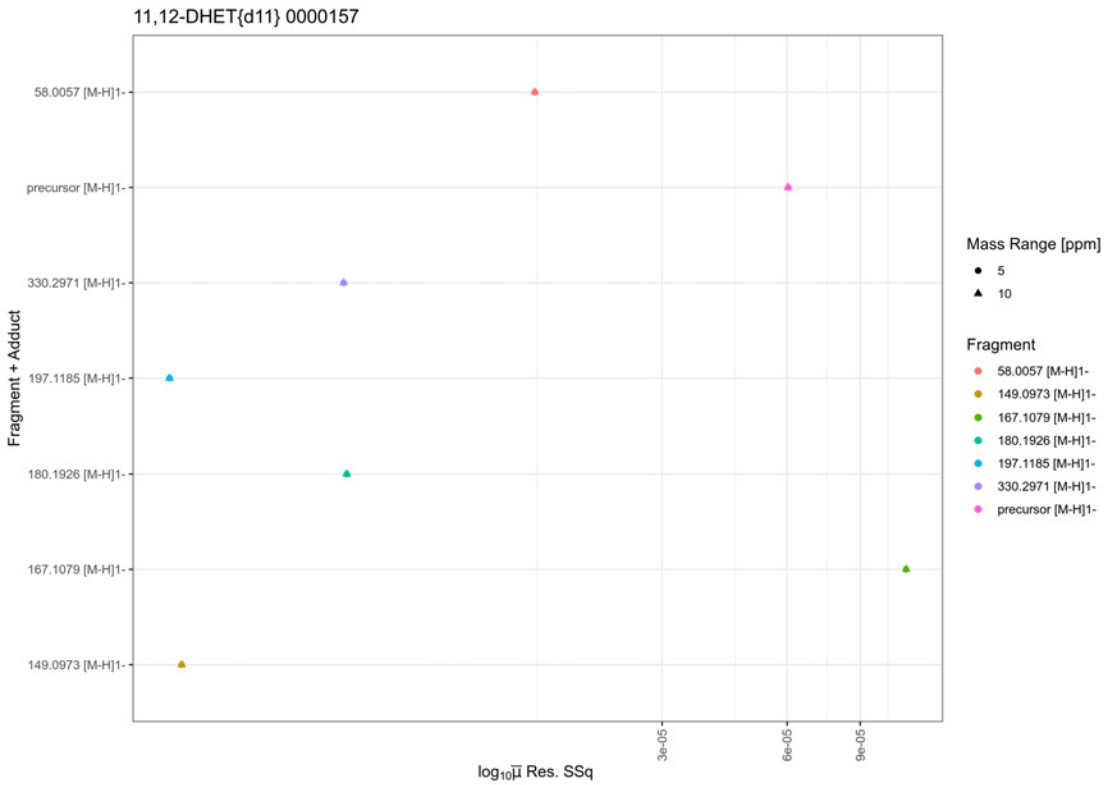

Figure 14. Normalized sum-of-squares of the residuals



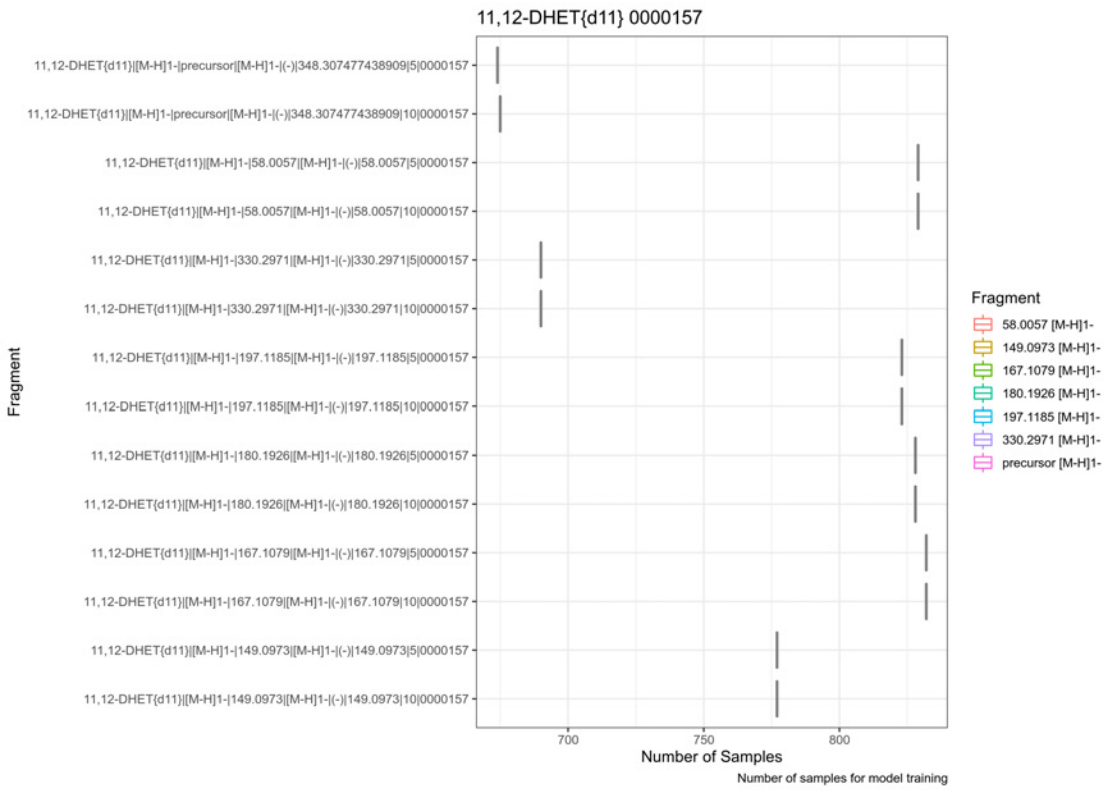

Figure 15. Number of samples used for training per combination Id

# 1.4. 11-HDoHE [M-H]1- 0001275

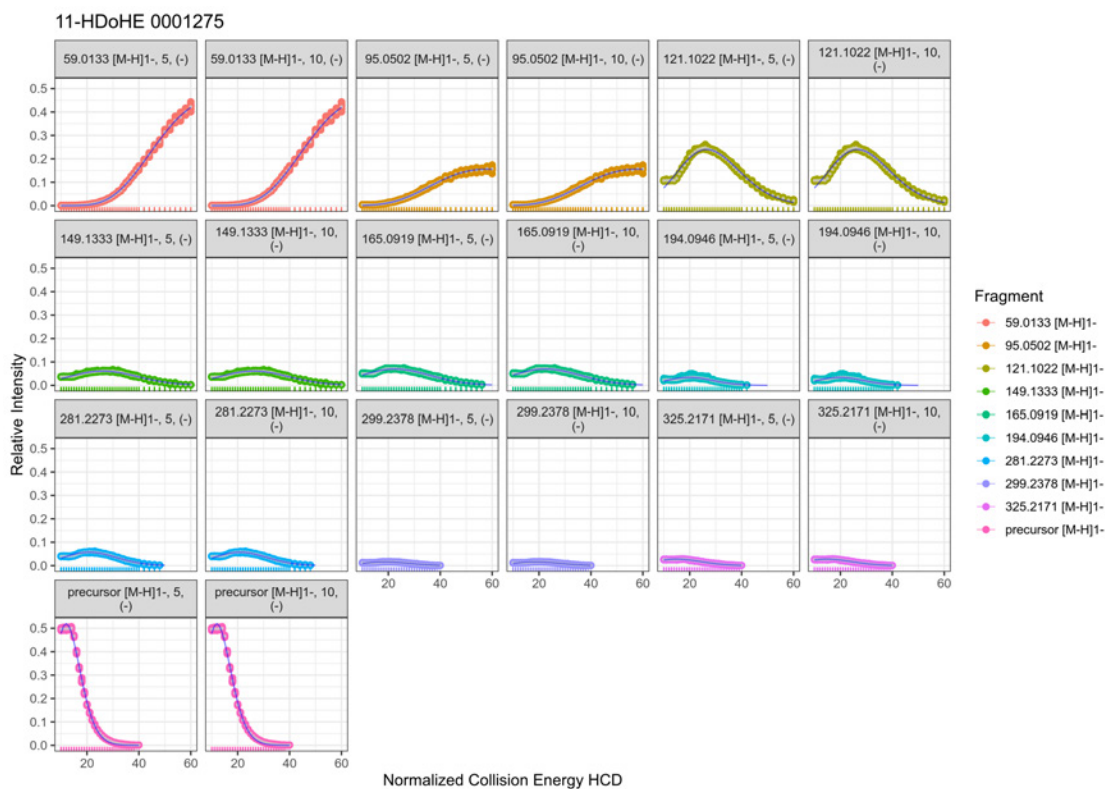

Figure 16. Nonlinear fit

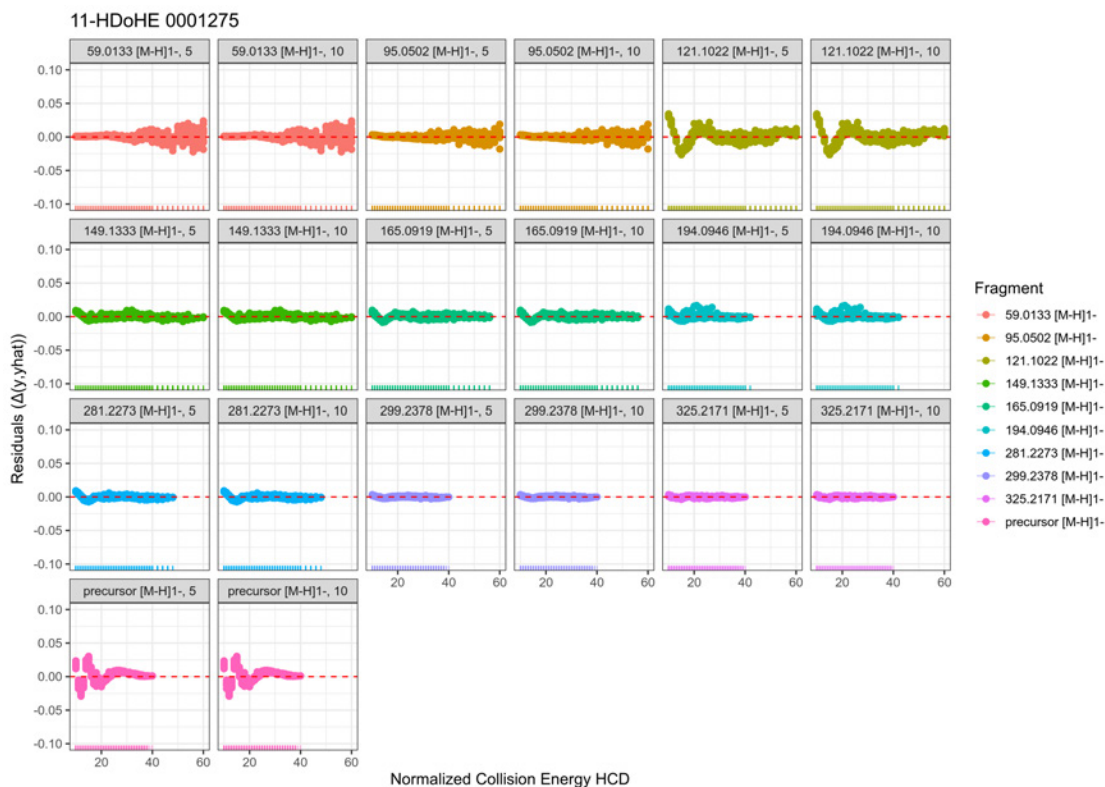

Figure 17. Residuals of nonlinear fit

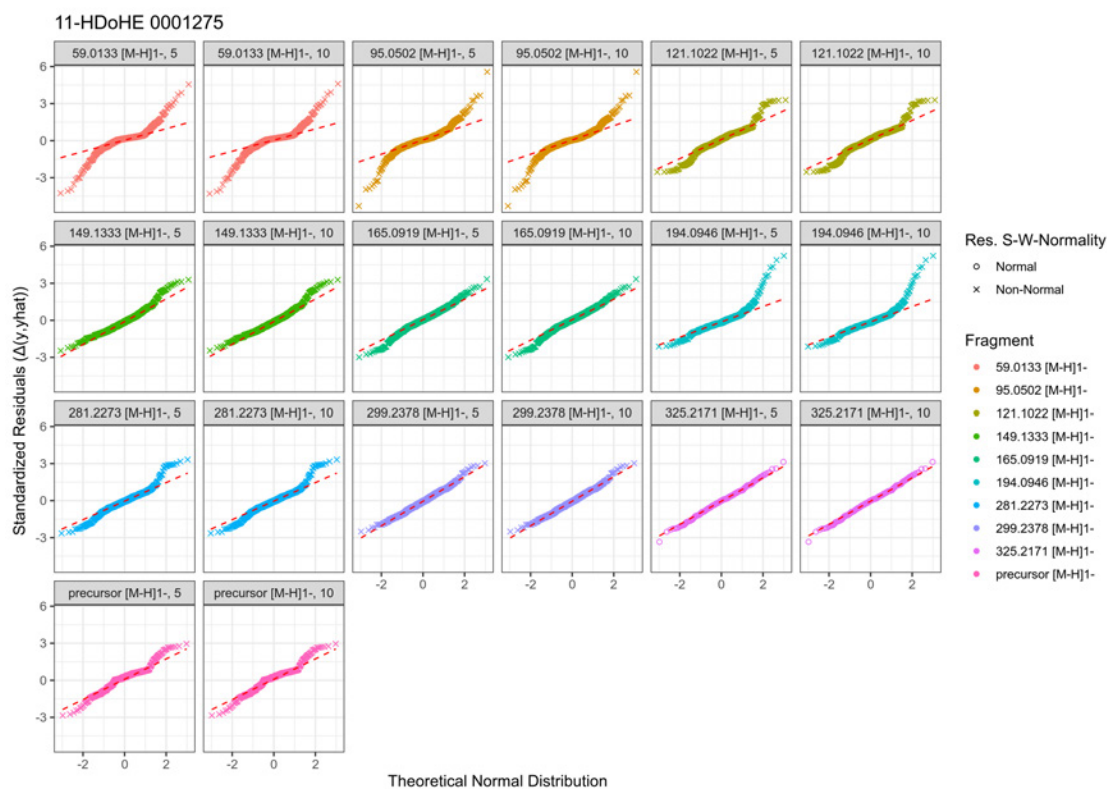

Figure 18. Quantile-quantile plot of residuals

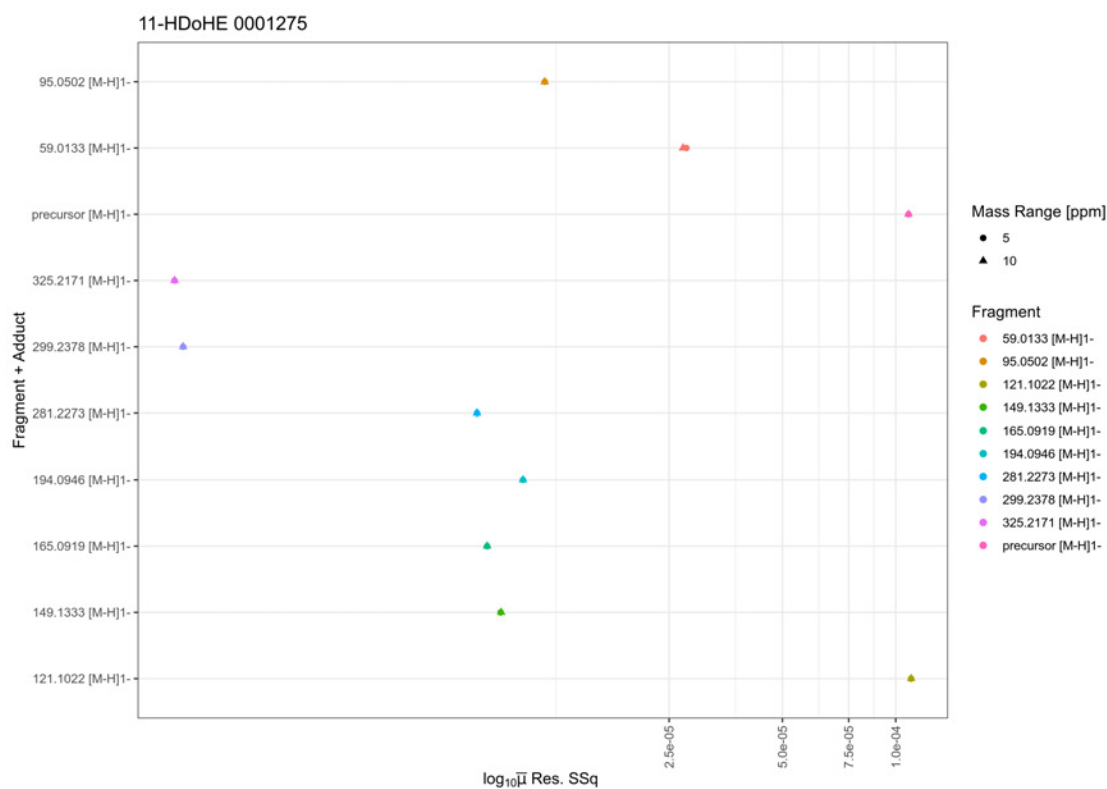

Figure 19. Normalized sum-of-squares of the residuals

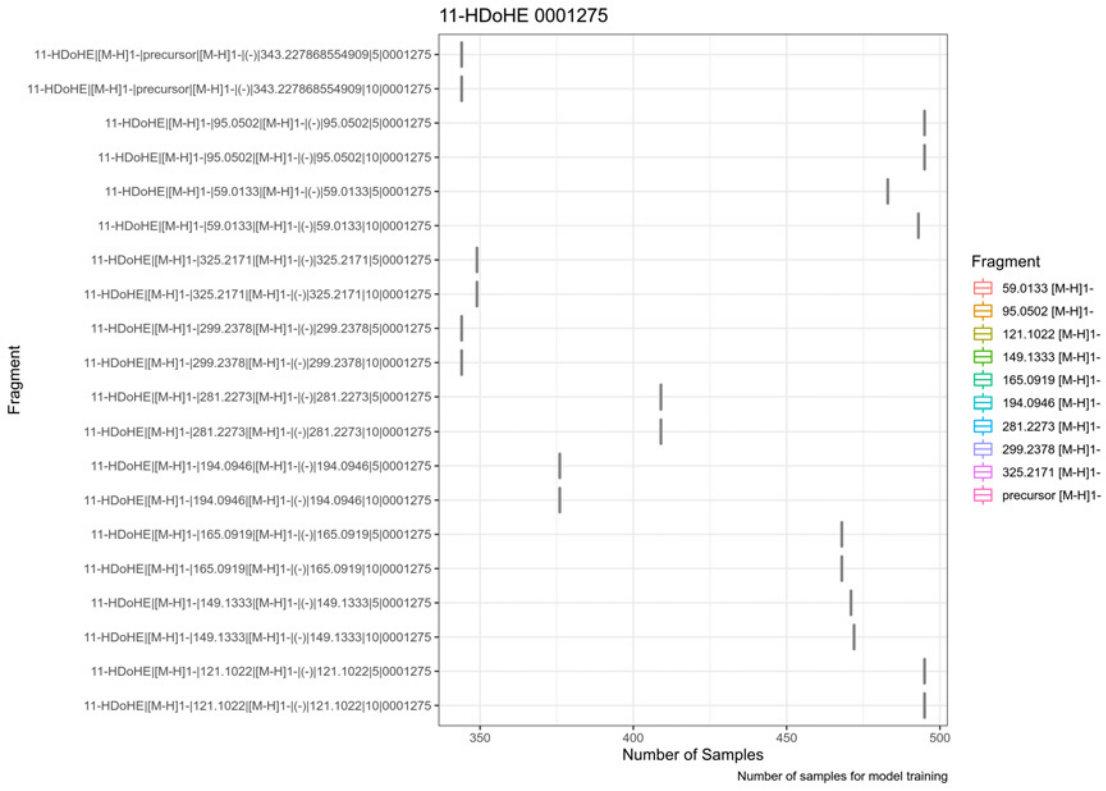

Figure 20. Number of samples used for training per combination Id

# 1.5. 11-HETE [M-H]1- 0001289

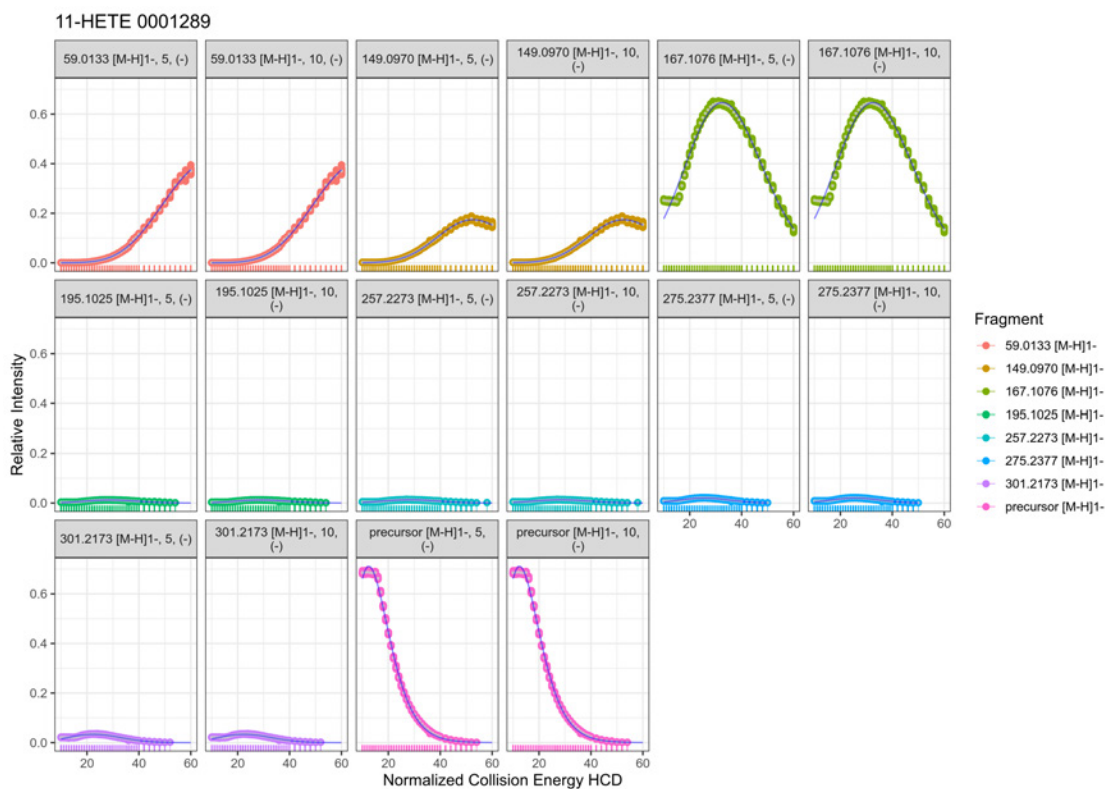

Figure 21. Nonlinear fit

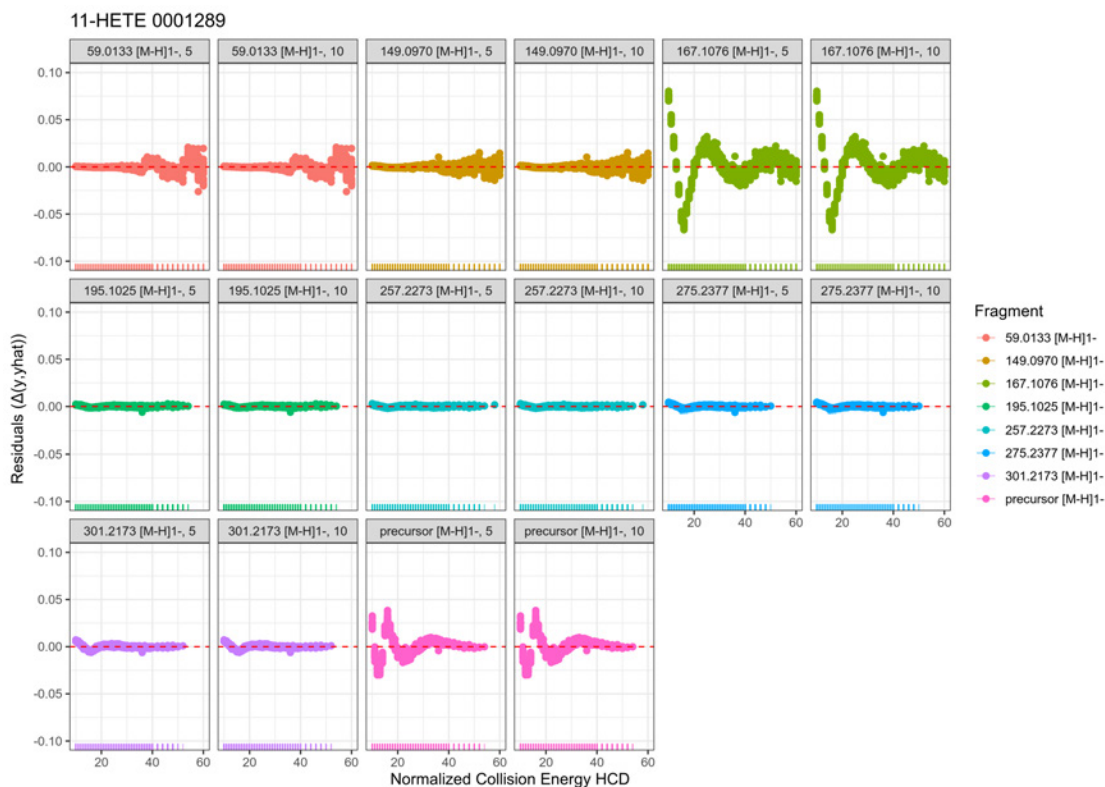

Figure 22. Residuals of nonlinear fit

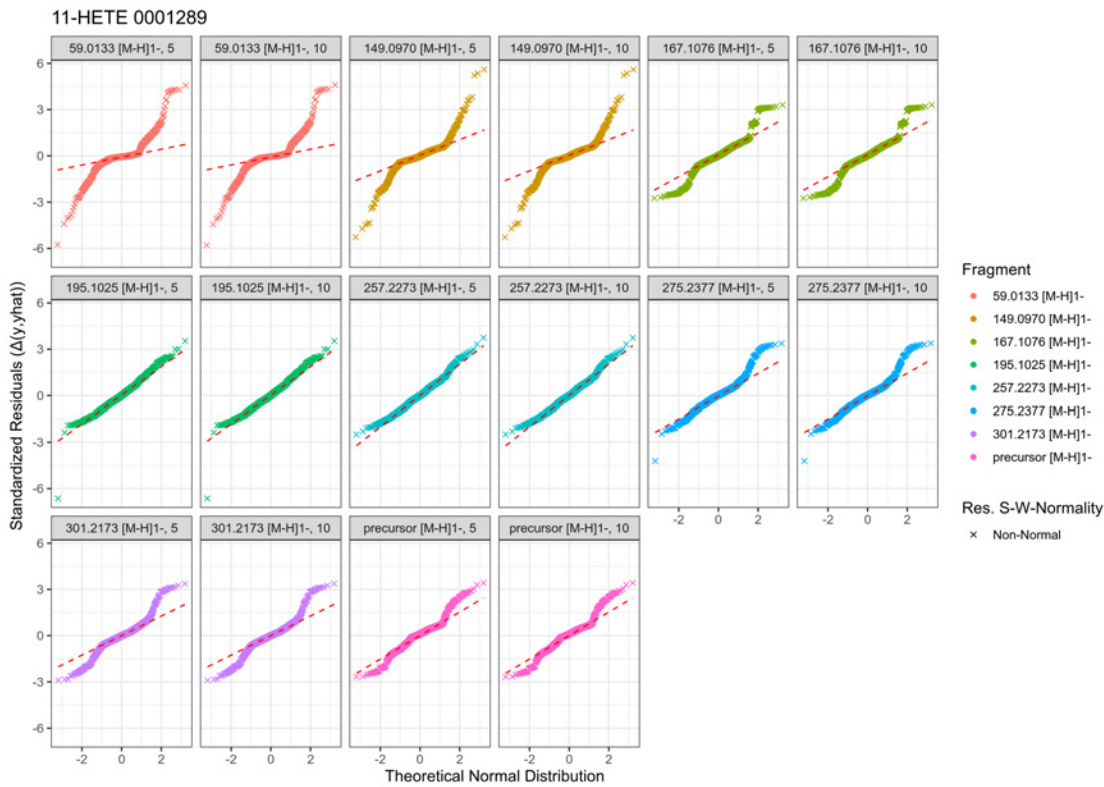

Figure 23. Quantile-quantile plot of residuals

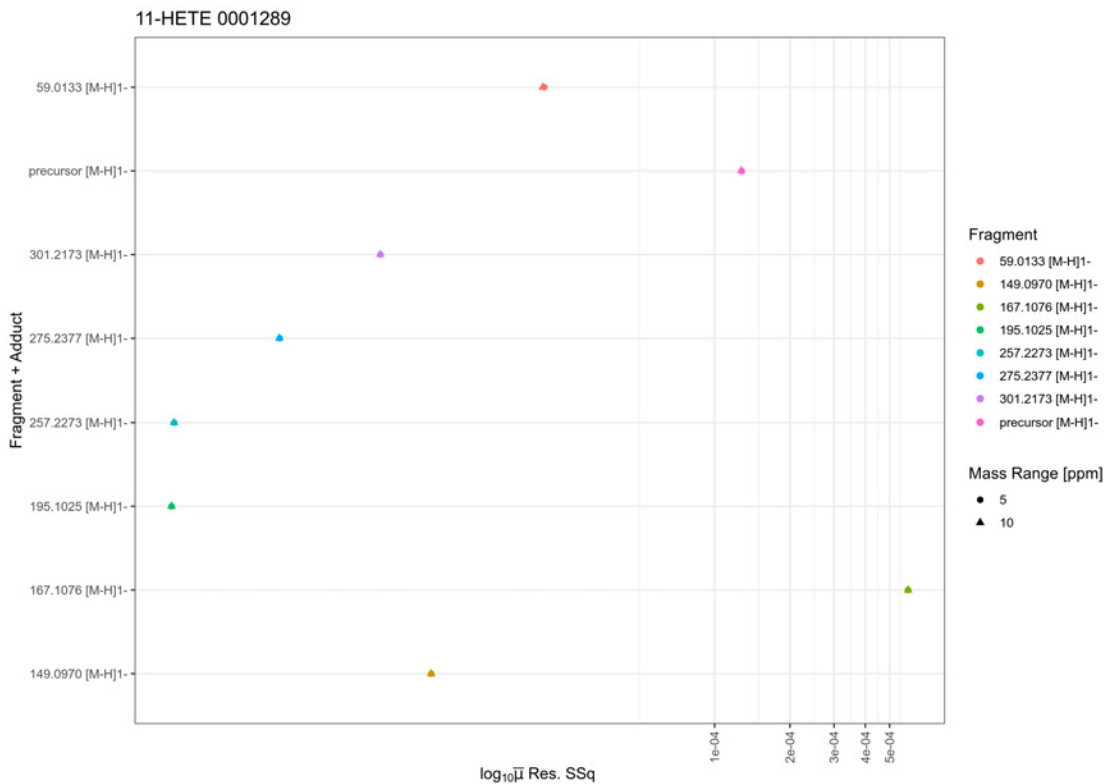

Figure 24. Normalized sum-of-squares of the residuals

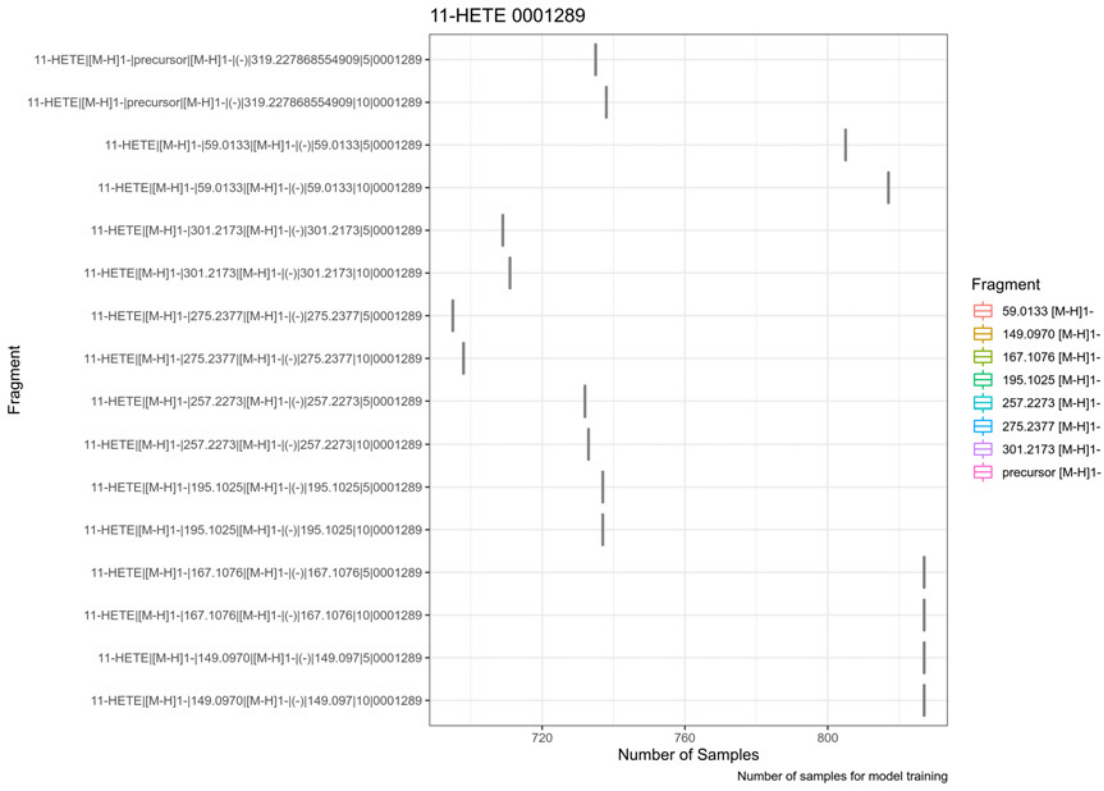

Figure 25. Number of samples used for training per combination Id



## 1.6. 12(13)-EpOME{d4} [M-H]1- 0001303

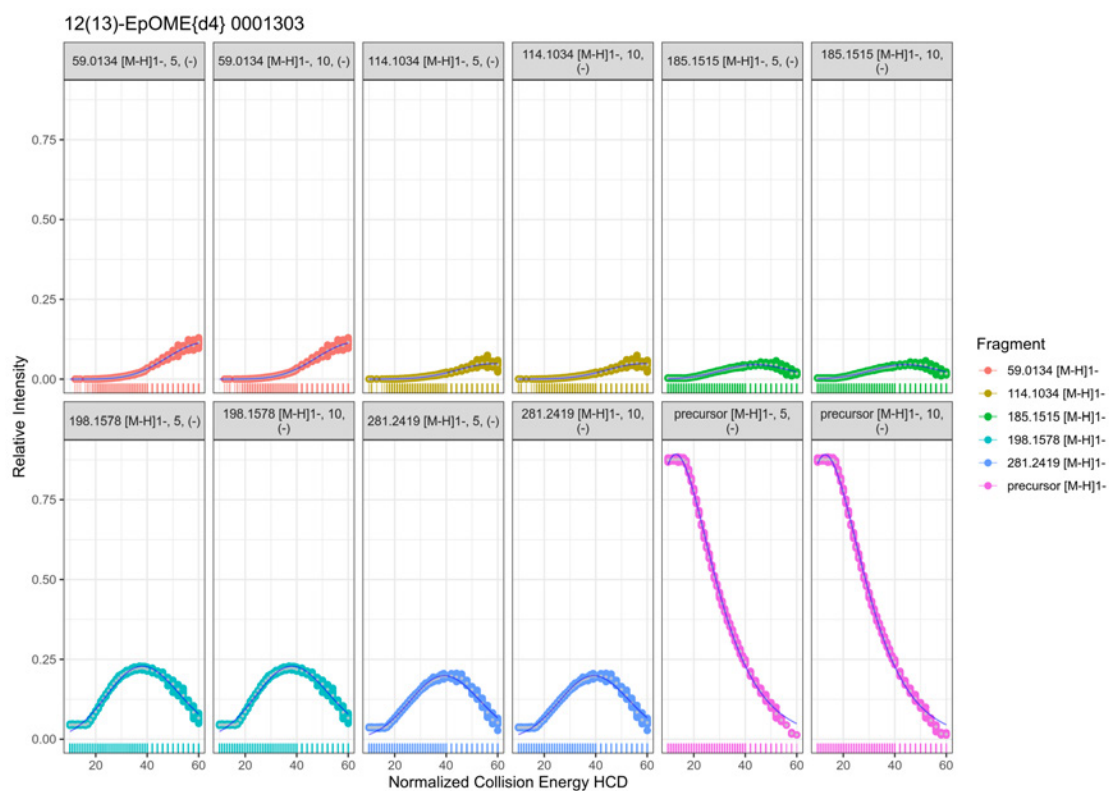

Figure 26. Nonlinear fit

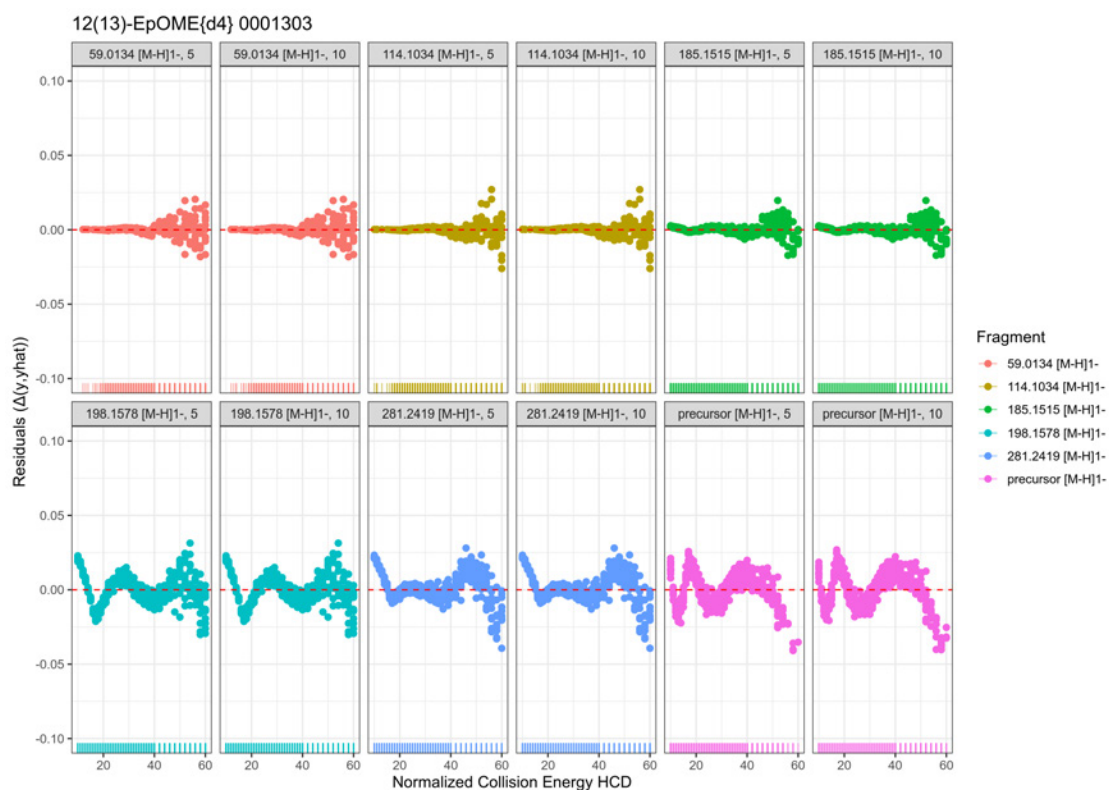

Figure 27. Residuals of nonlinear fit



12(13)-EpOME{d4} 0001303

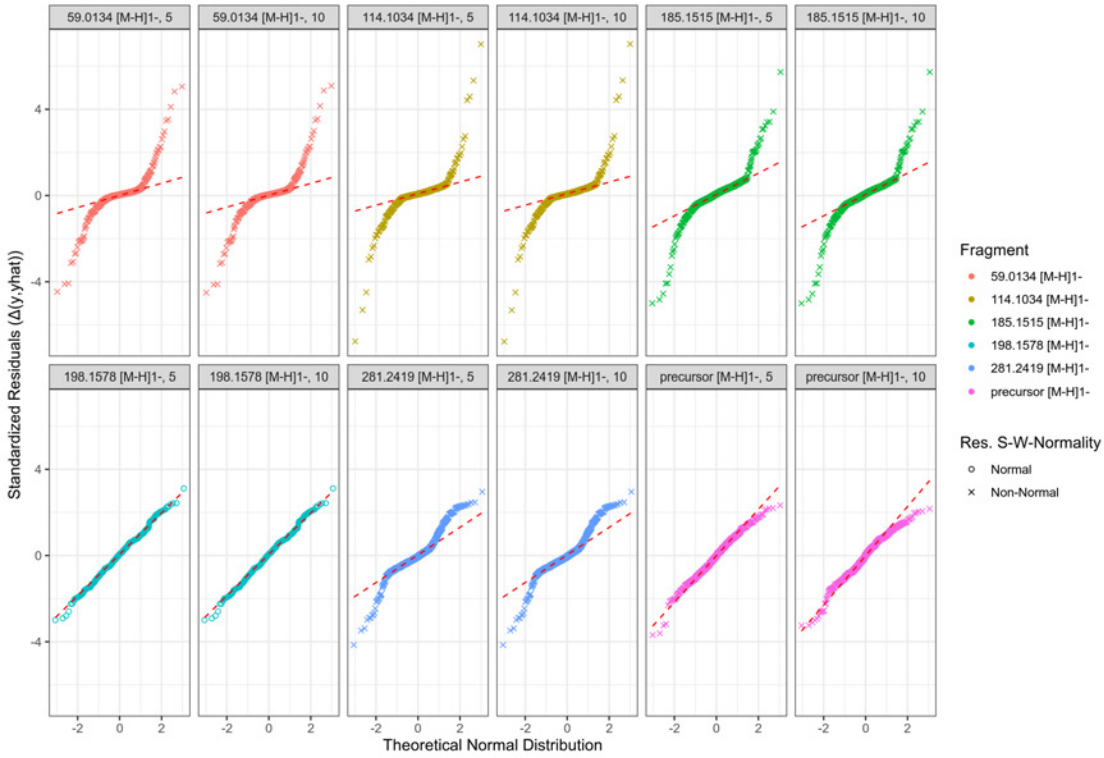

Figure 28. Quantile-quantile plot of residuals

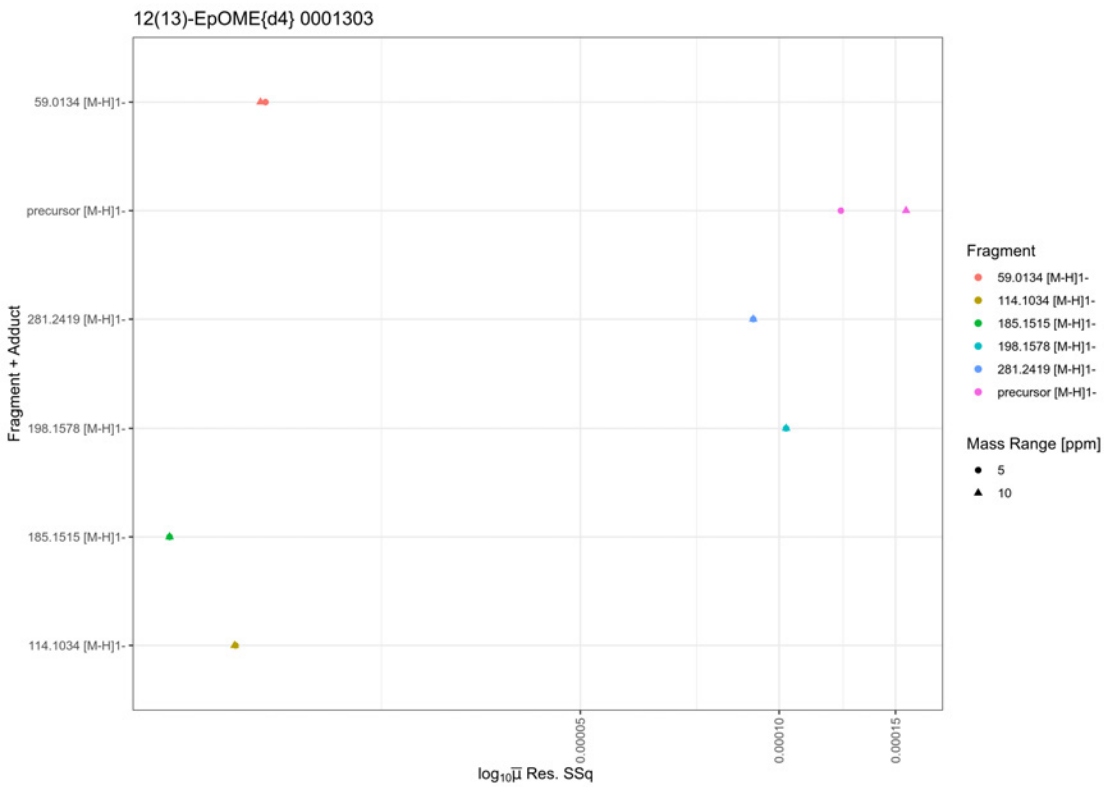

Figure 29. Normalized sum-of-squares of the residuals

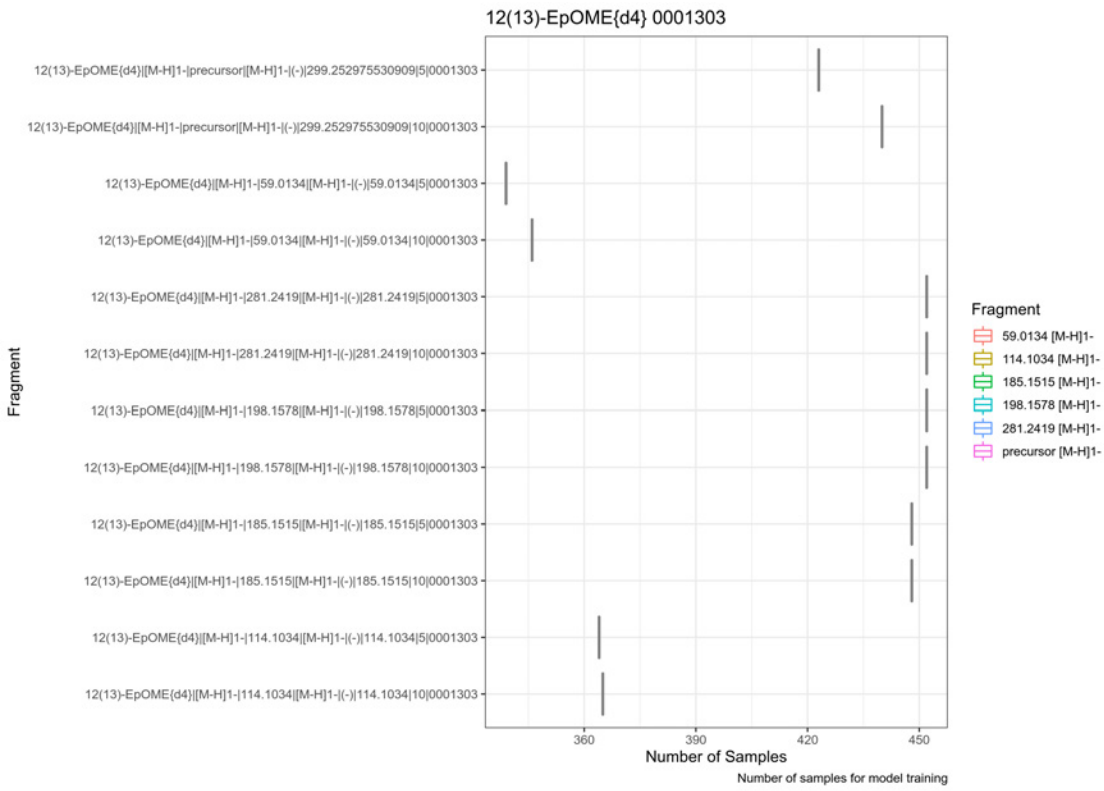

Figure 30. Number of samples used for training per combination Id

# 1.7. 12-HEPE [M-H]1- 0001281

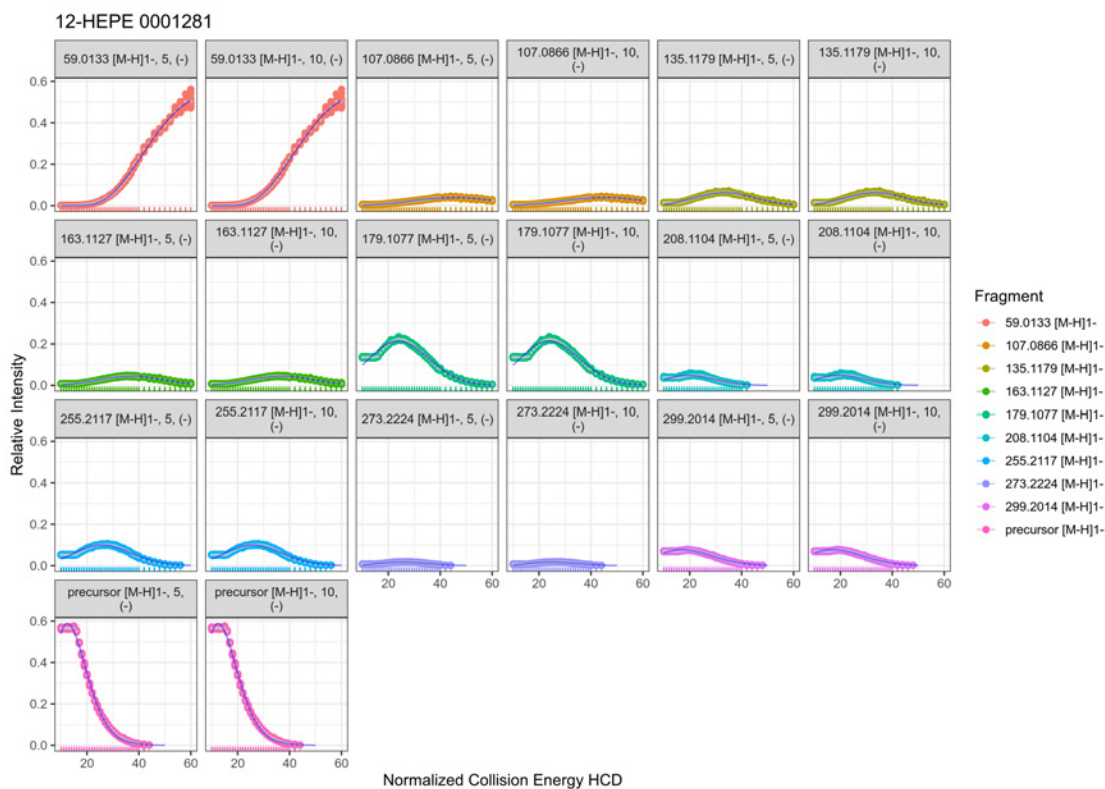

Figure 31. Nonlinear fit

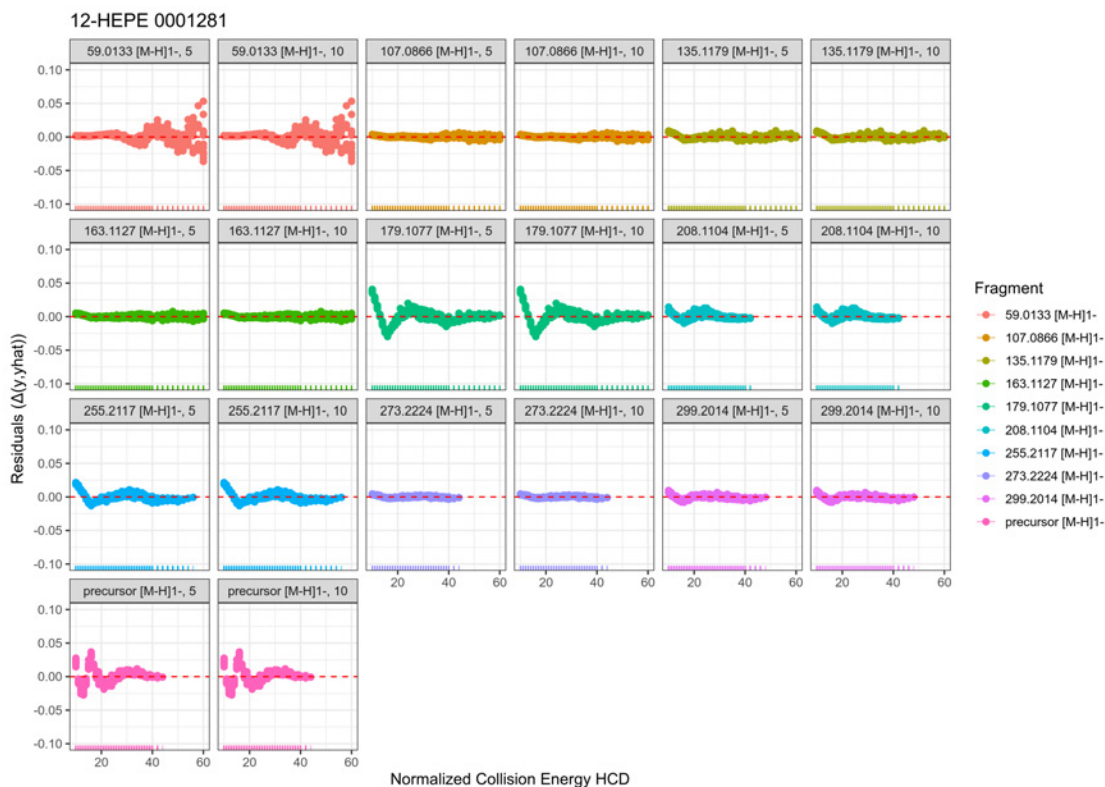

Figure 32. Residuals of nonlinear fit

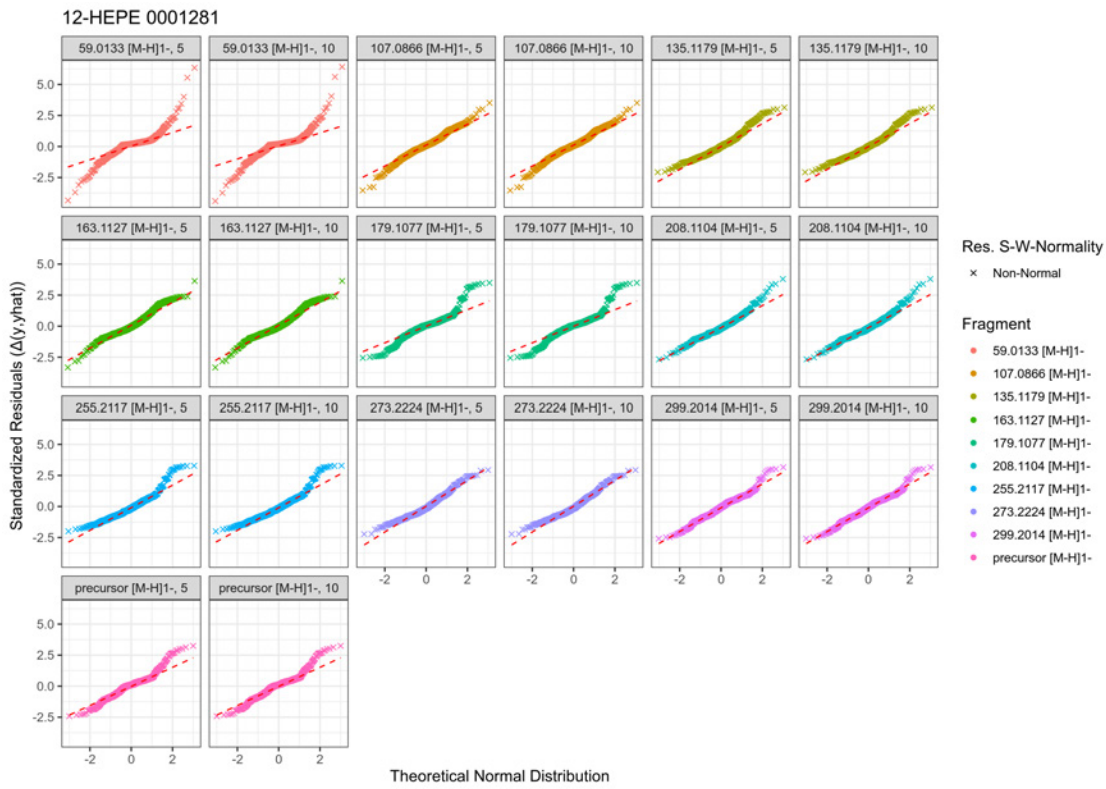

Figure 33. Quantile-quantile plot of residuals

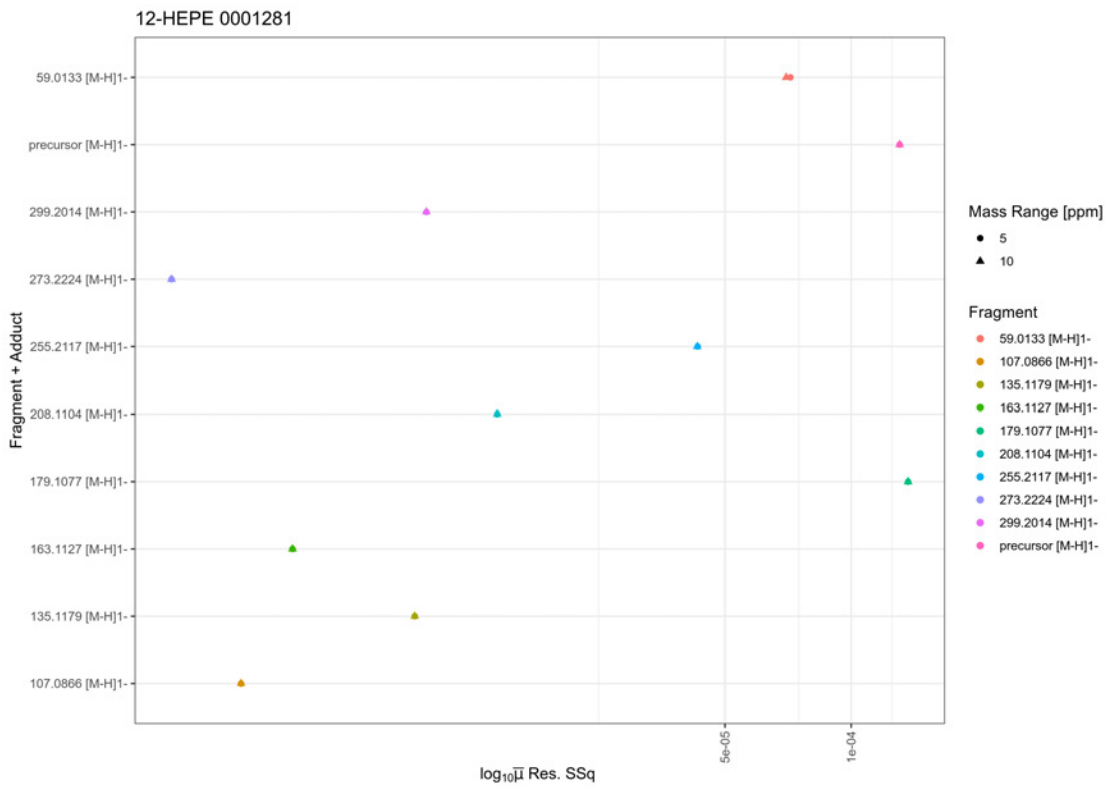

Figure 34. Normalized sum-of-squares of the residuals

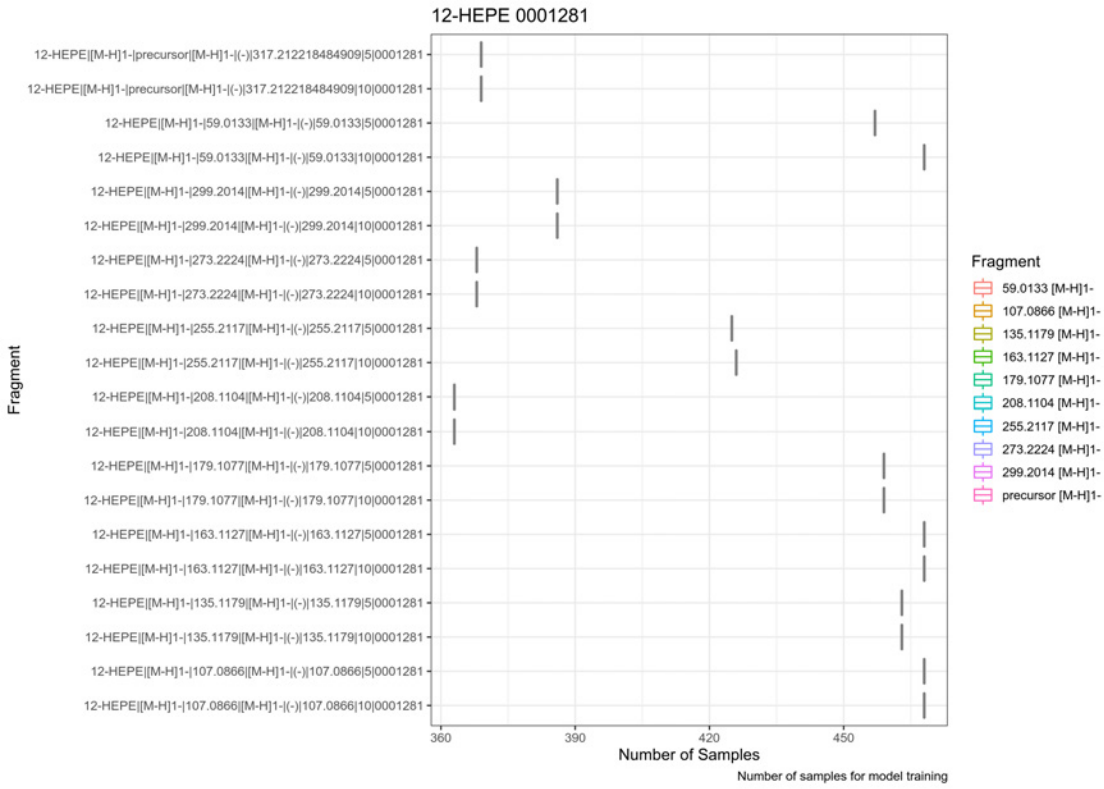

Figure 35. Number of samples used for training per combination Id

# 1.8. 12-HETE{d8} [M-H]1- 0001295

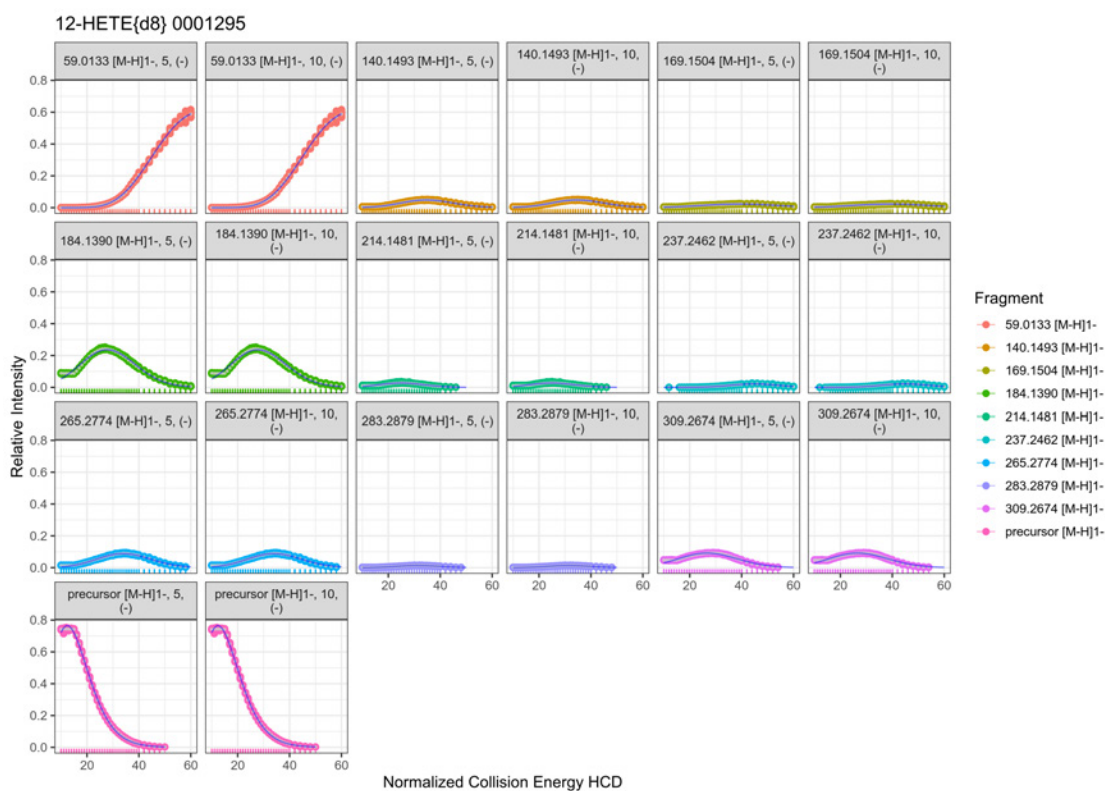

Figure 36. Nonlinear fit

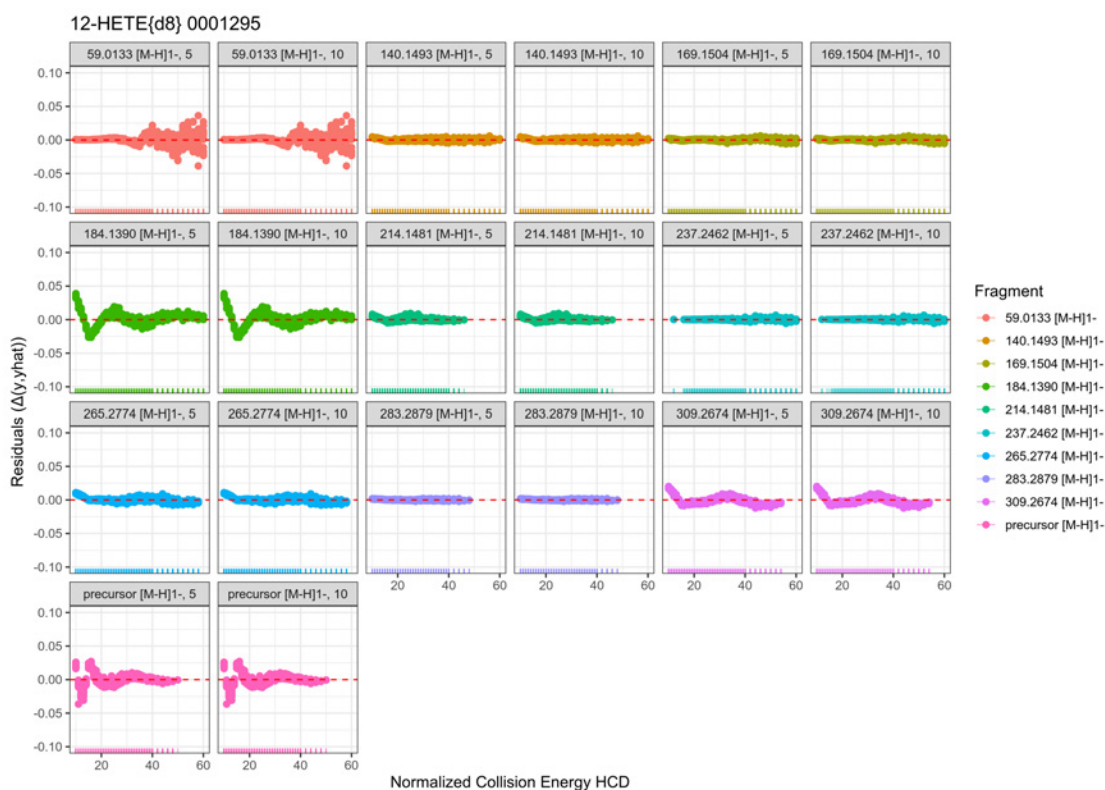

Figure 37. Residuals of nonlinear fit



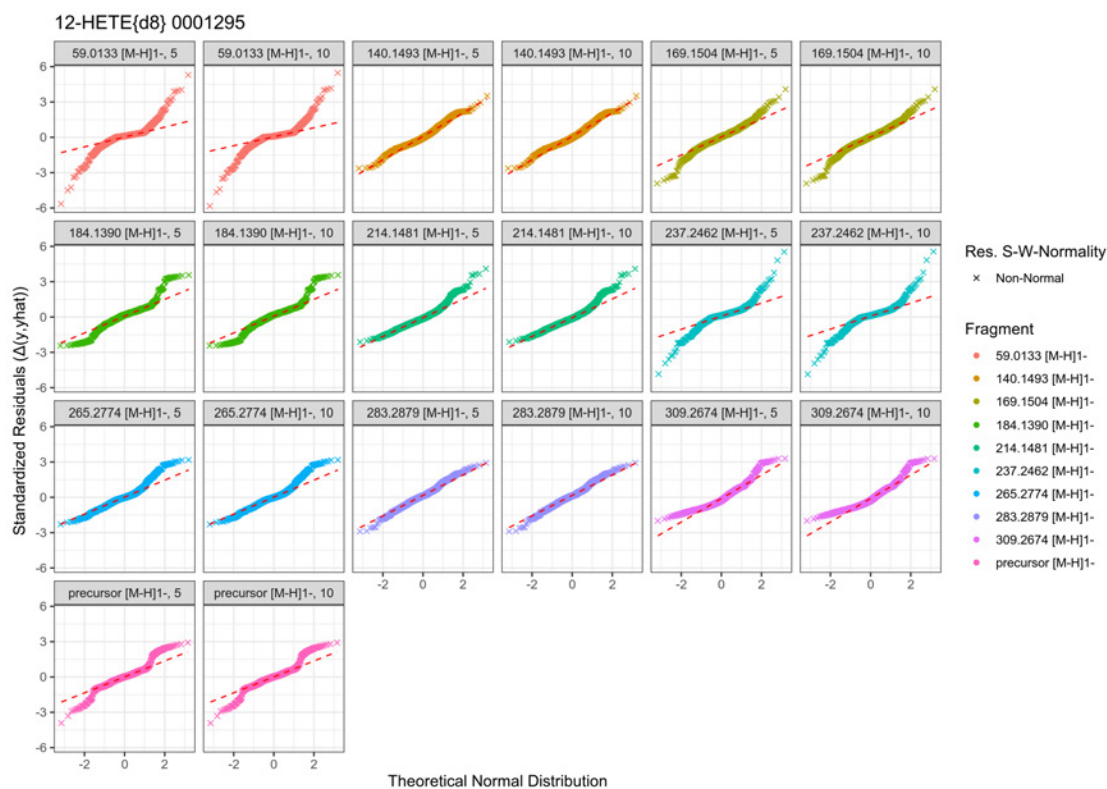

Figure 38. Quantile-quantile plot of residuals

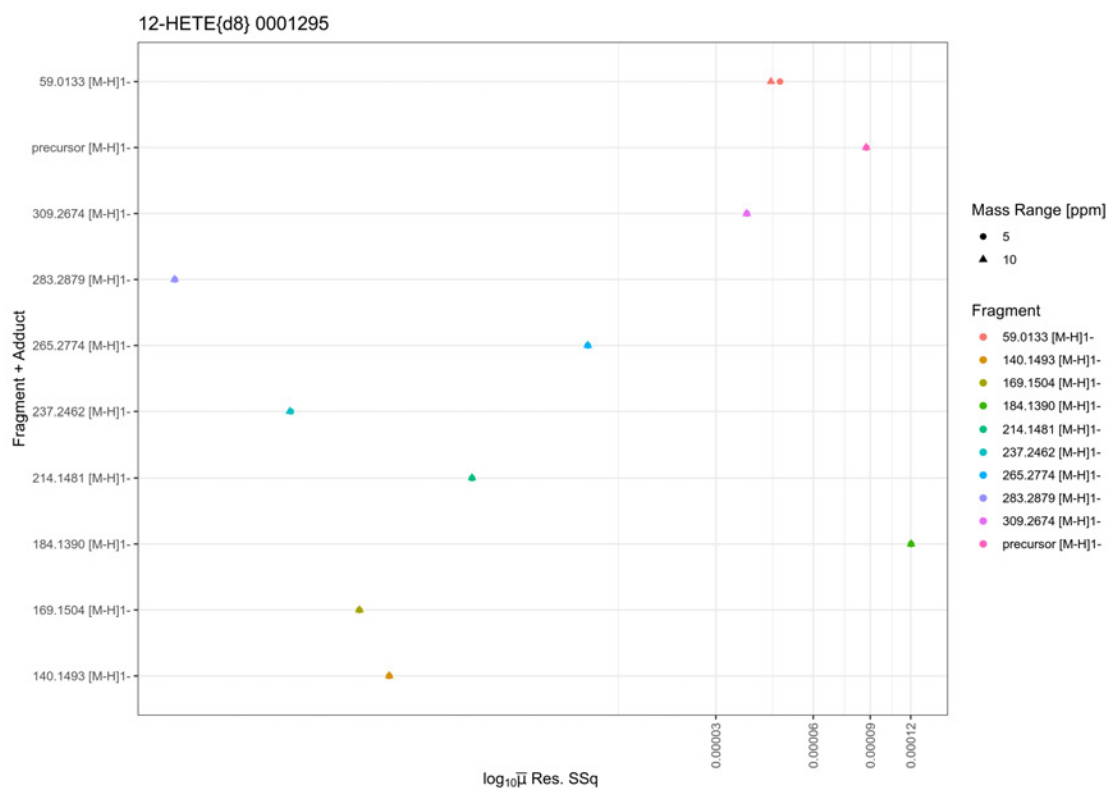

Figure 39. Normalized sum-of-squares of the residuals

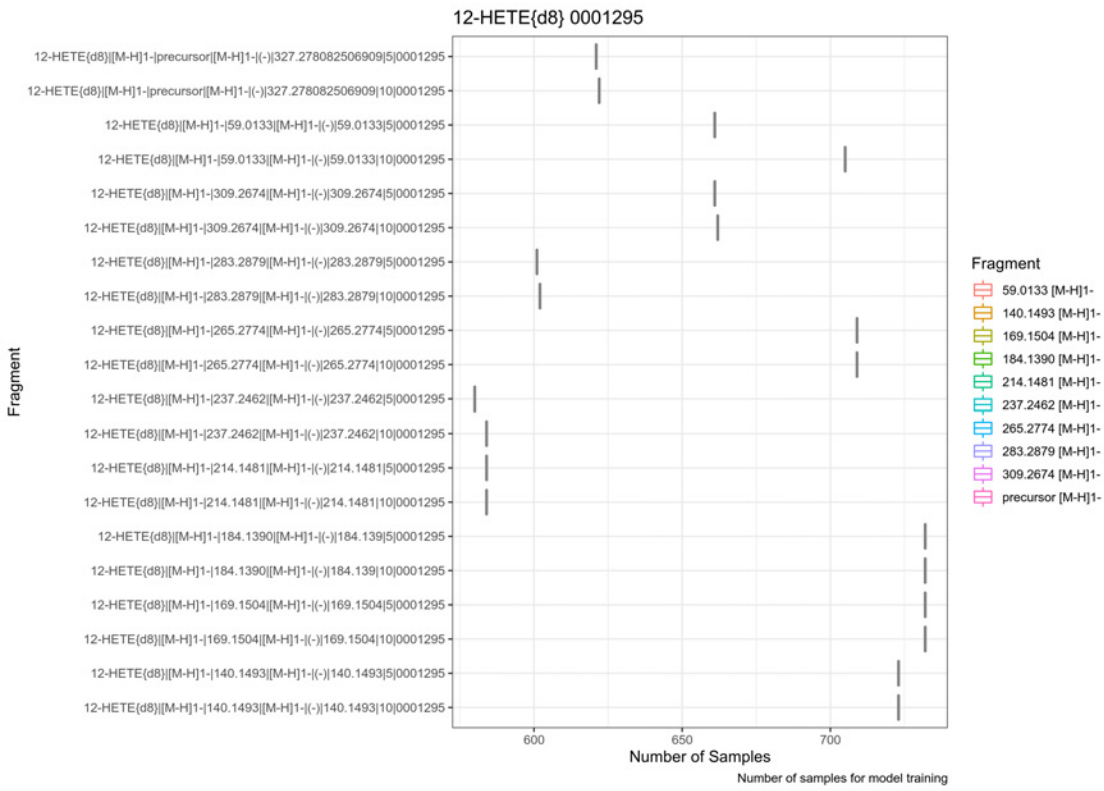

Figure 40. Number of samples used for training per combination Id



# 1.9. 12-HHTrE [M-H]1- 0001347

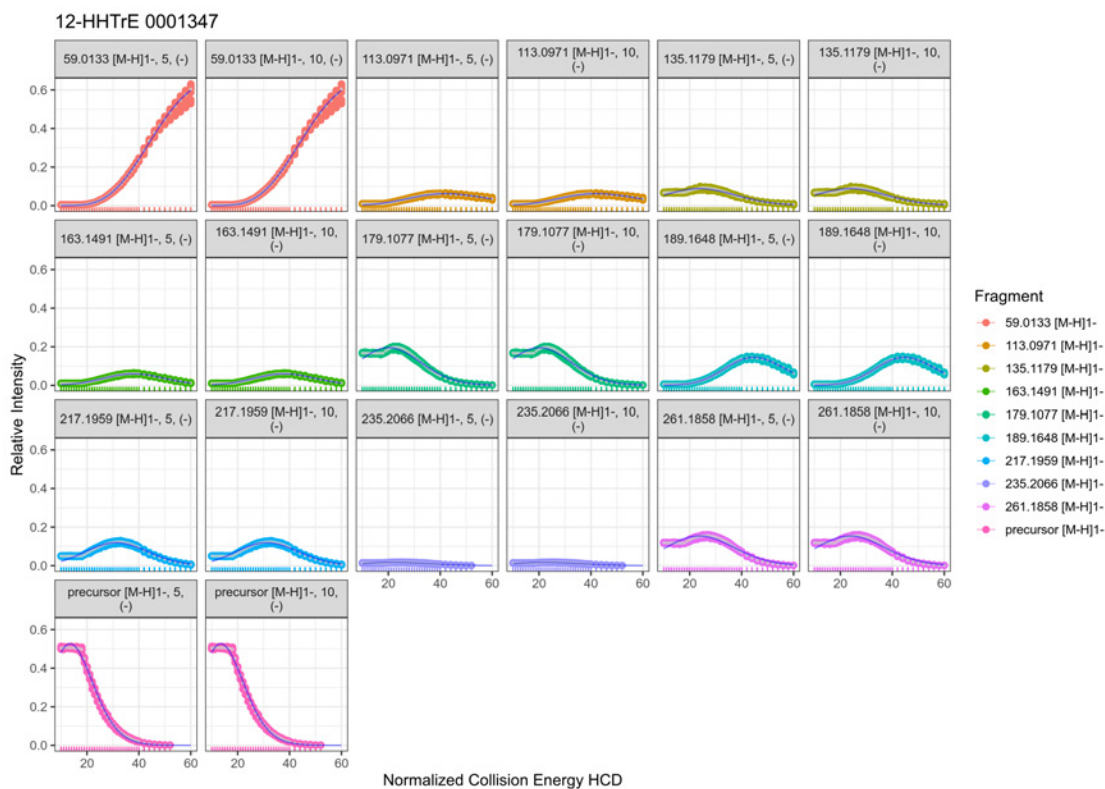

Figure 41. Nonlinear fit

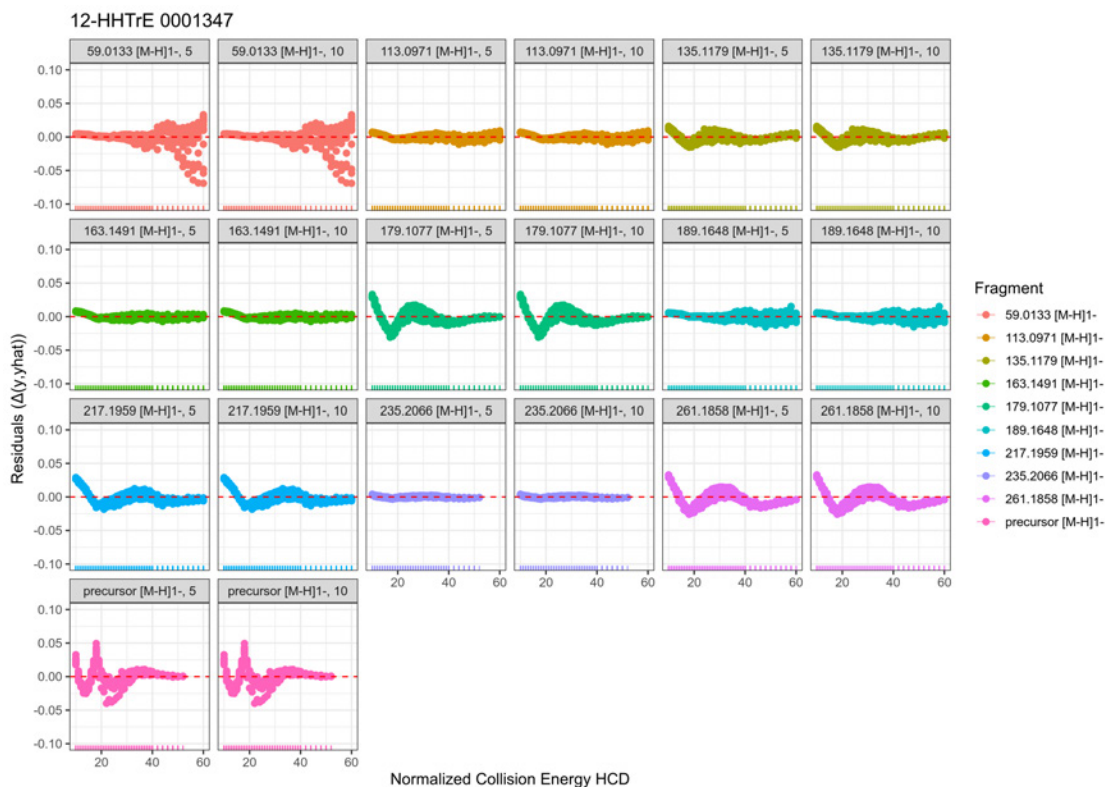

Figure 42. Residuals of nonlinear fit

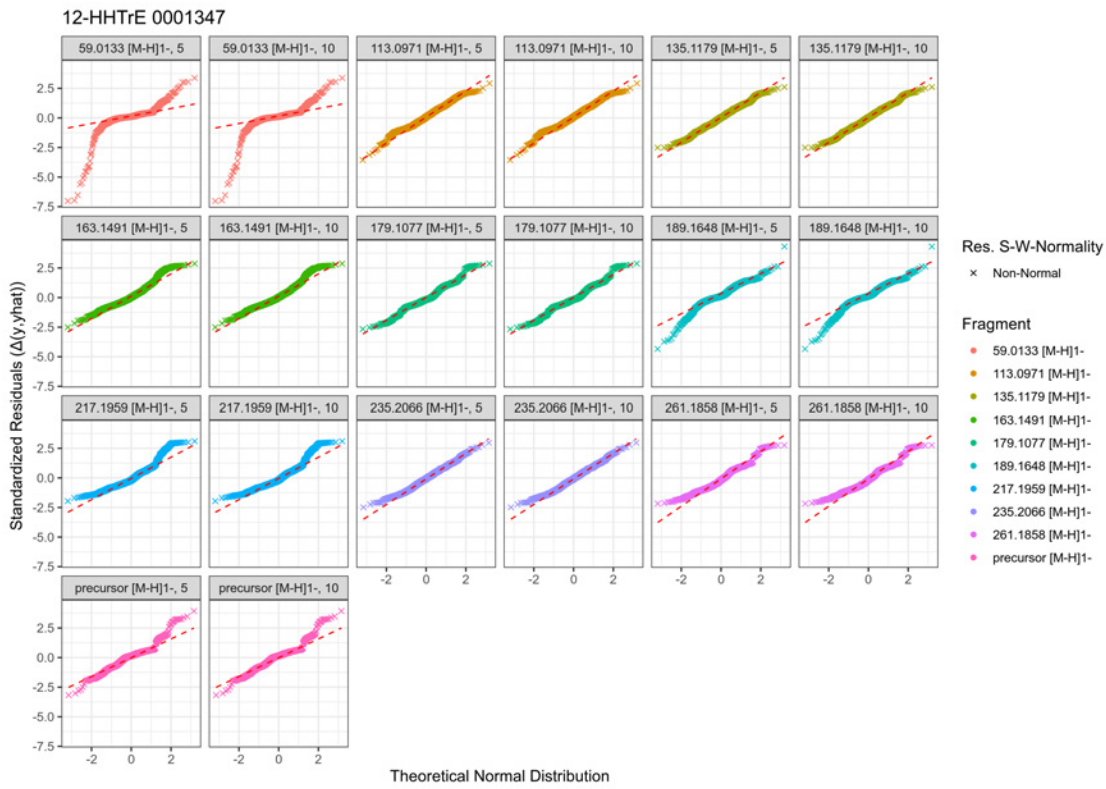

Figure 43. Quantile-quantile plot of residuals

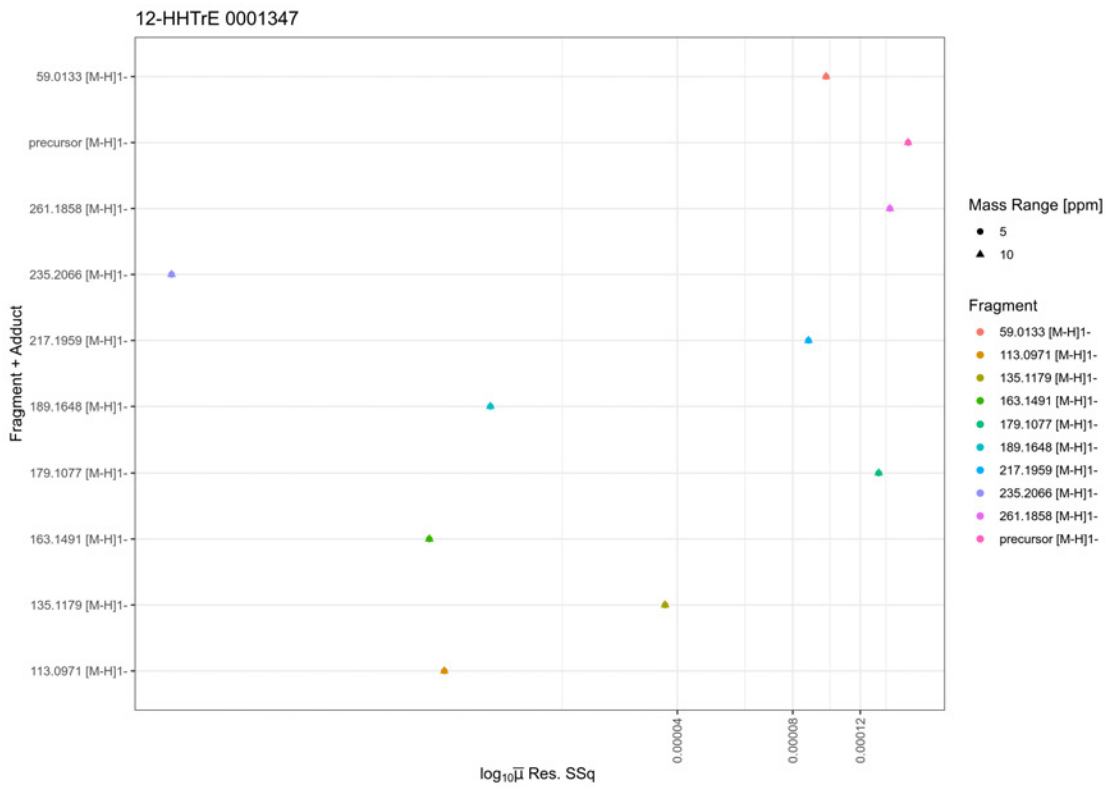

Figure 44. Normalized sum-of-squares of the residuals

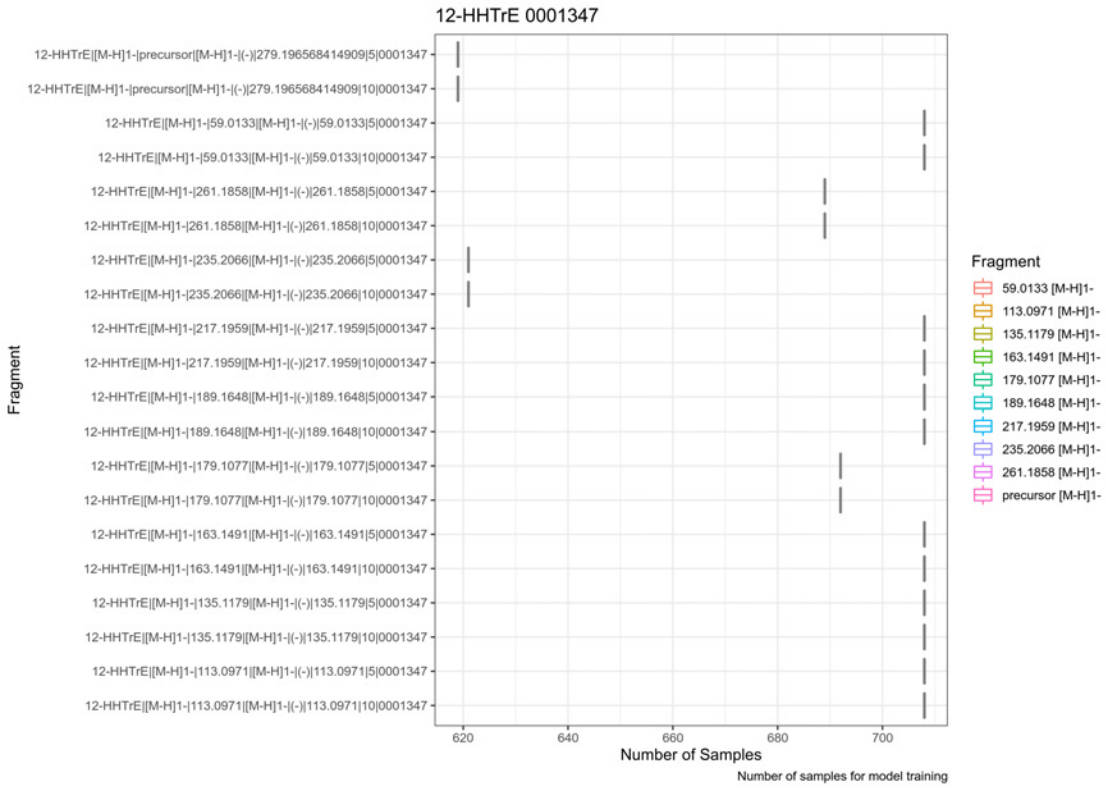

Figure 45. Number of samples used for training per combination Id

# 1.10. 12-OxoETE [M-H]1- 0001283

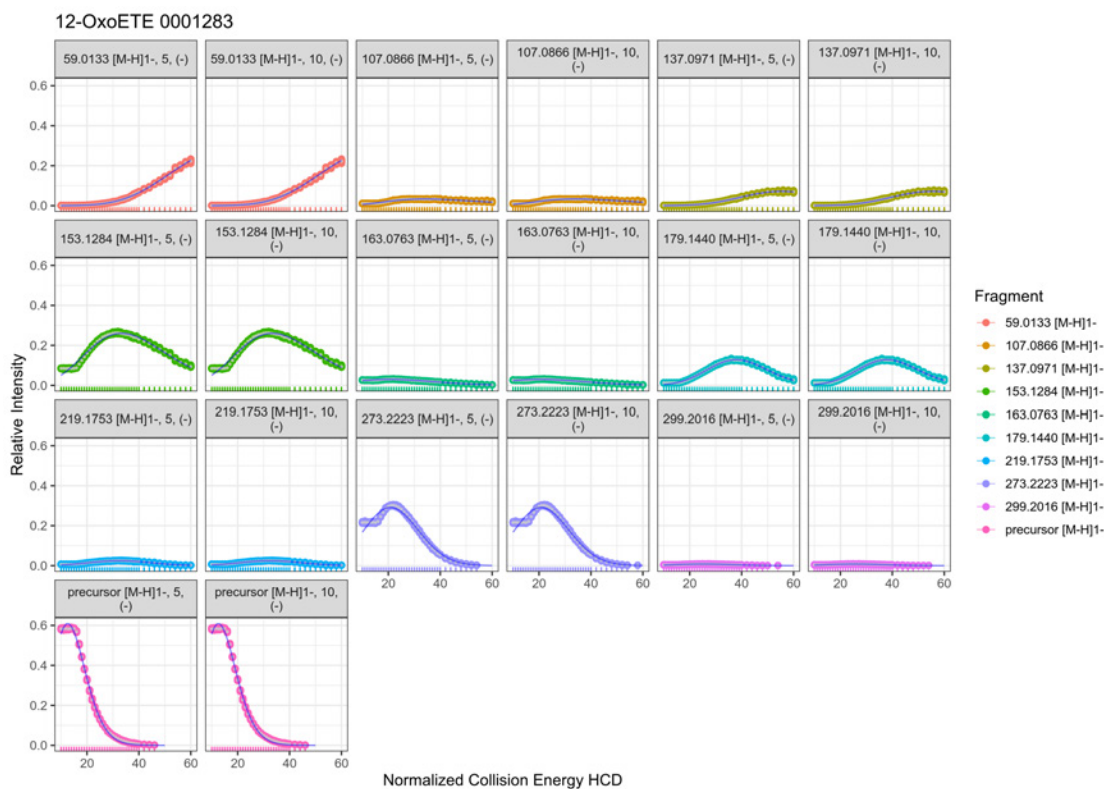

Figure 46. Nonlinear fit

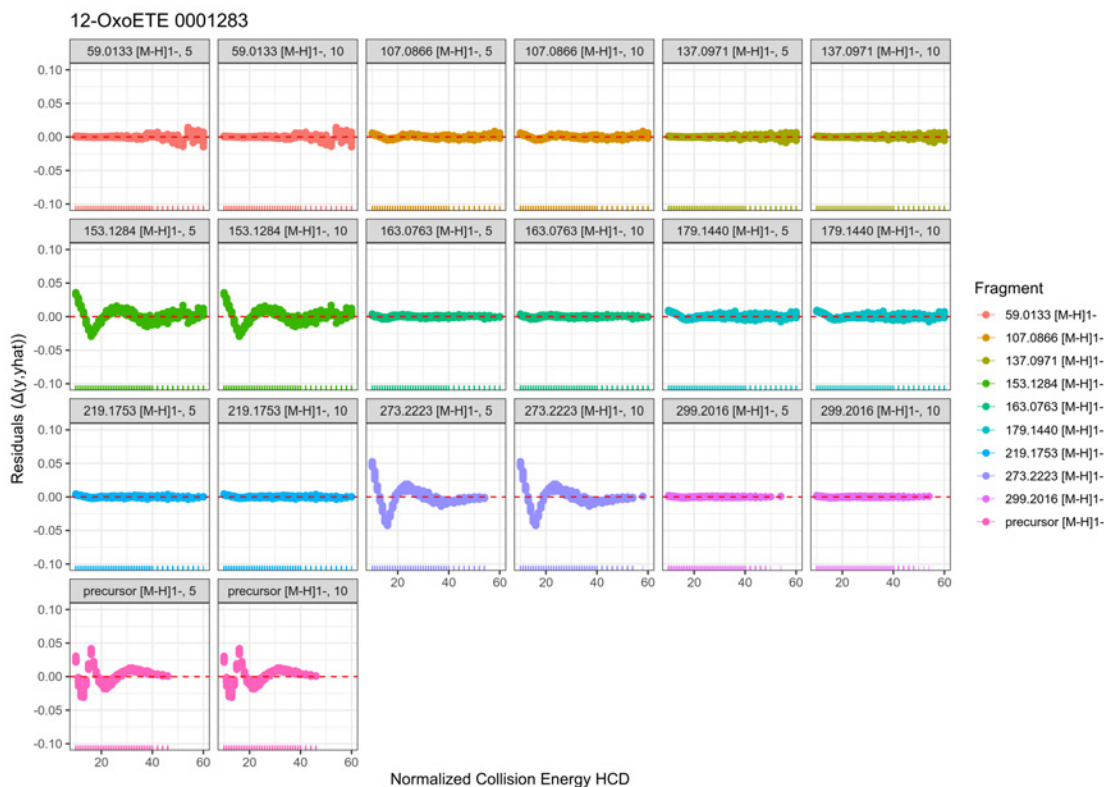

Figure 47. Residuals of nonlinear fit

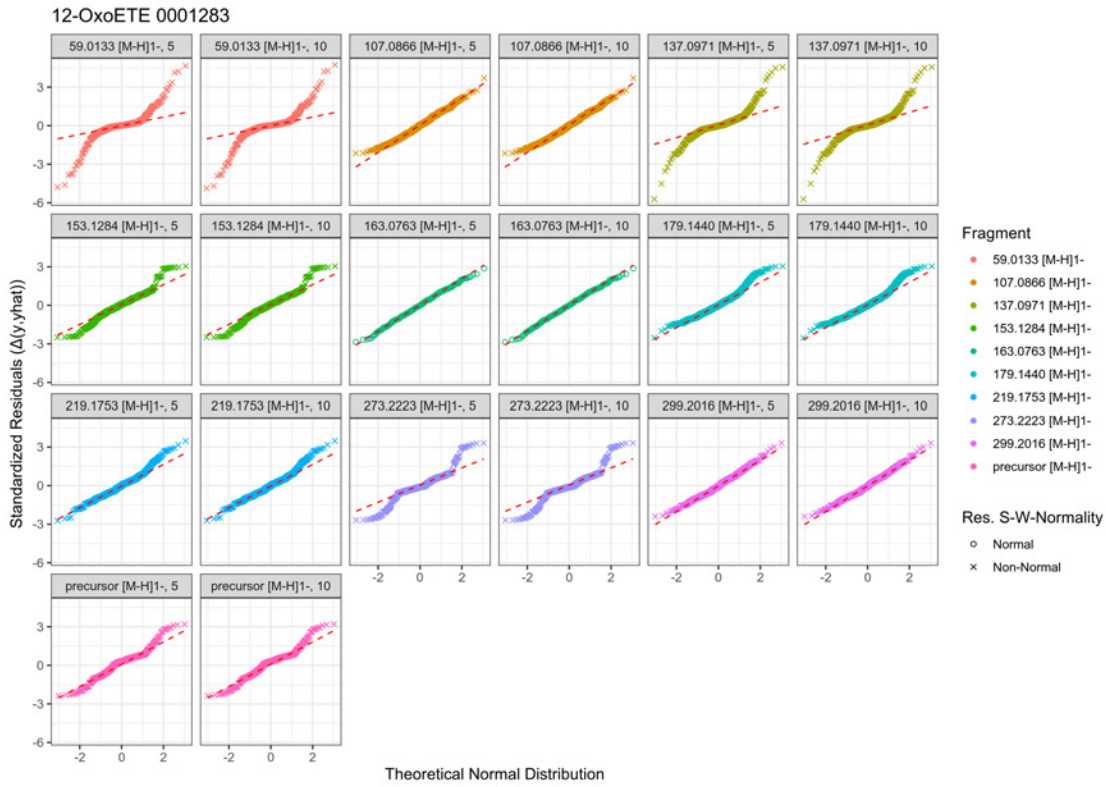

Figure 48. Quantile-quantile plot of residuals

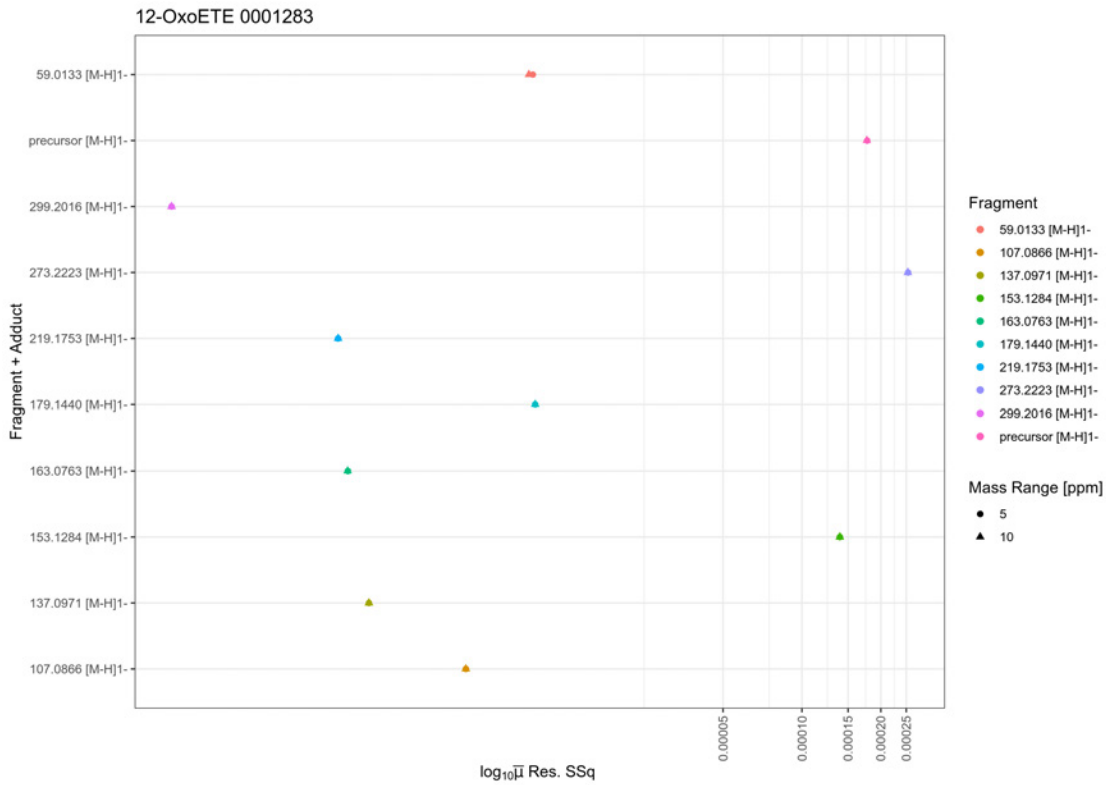

Figure 49. Normalized sum-of-squares of the residuals

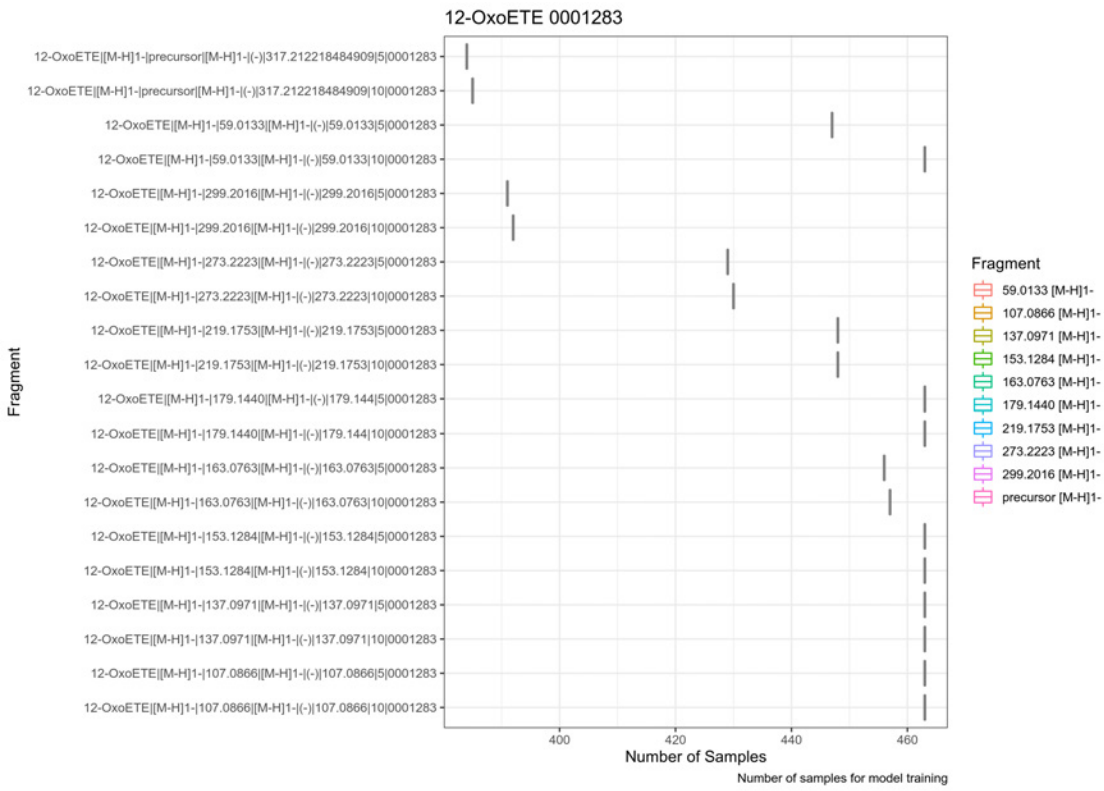

Figure 50. Number of samples used for training per combination Id



# 1.11. 13-HODE{d4} [M-H]1- 0001277

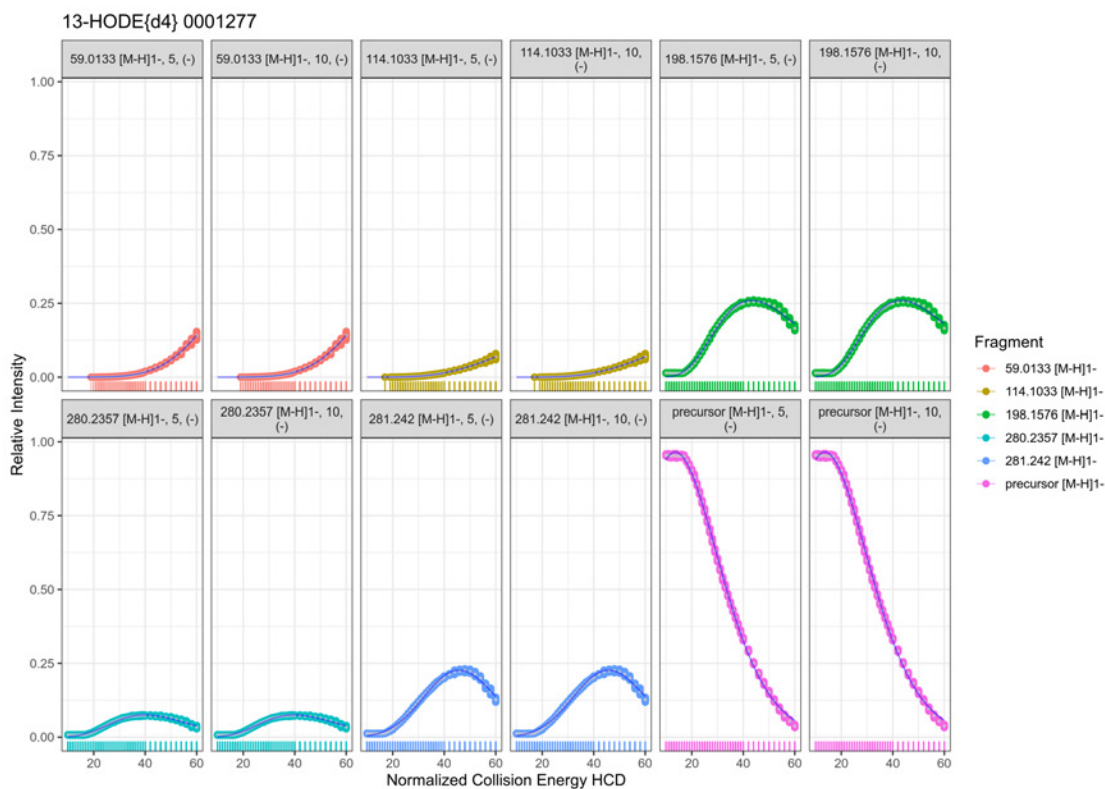

Figure 51. Nonlinear fit

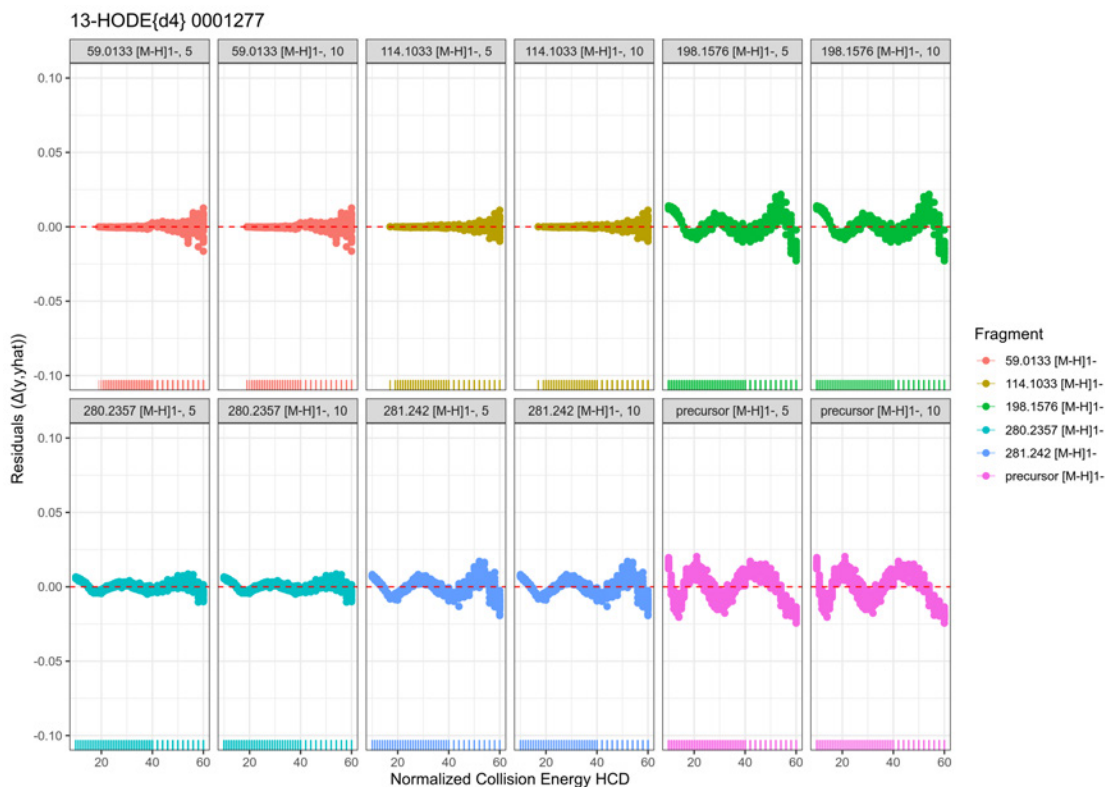

Figure 52. Residuals of nonlinear fit

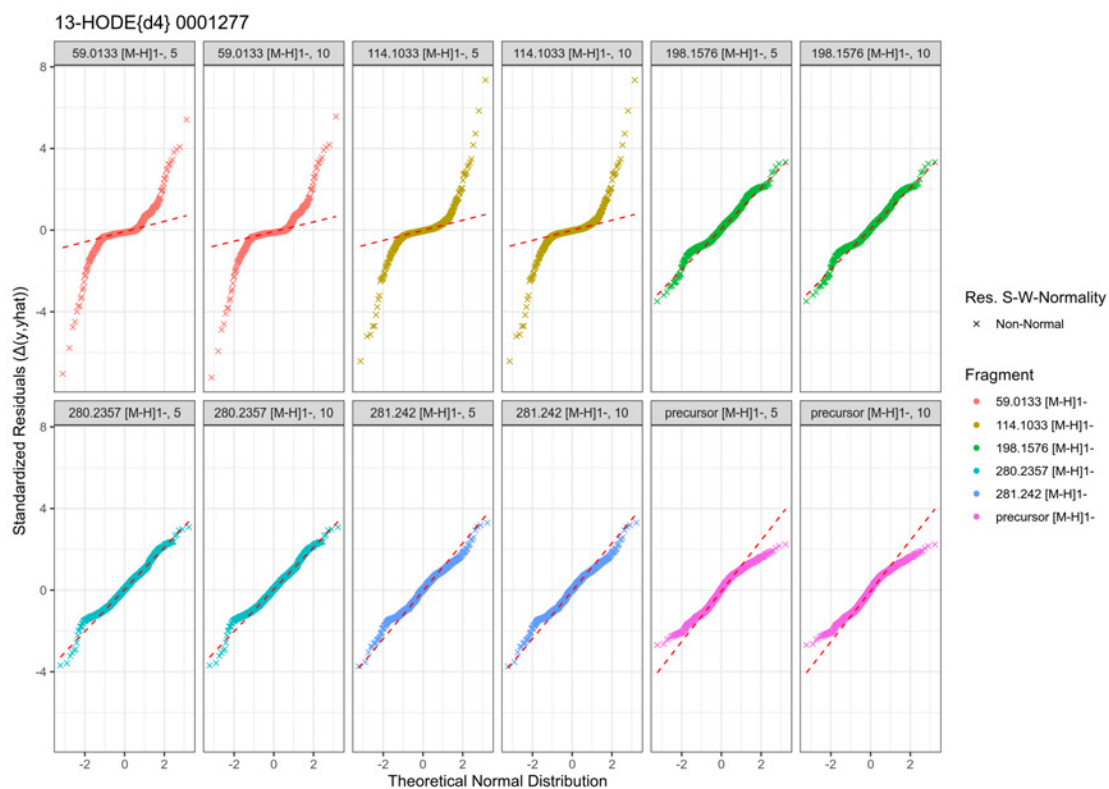

Figure 53. Quantile-quantile plot of residuals

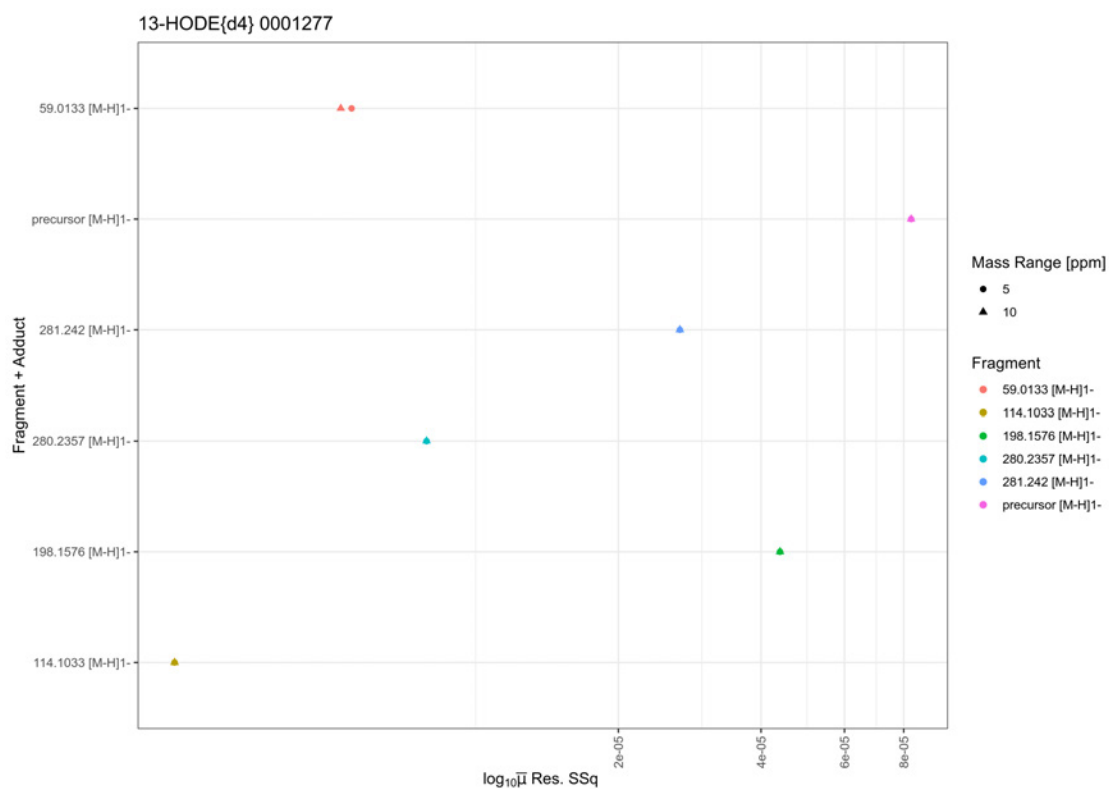

Figure 54. Normalized sum-of-squares of the residuals



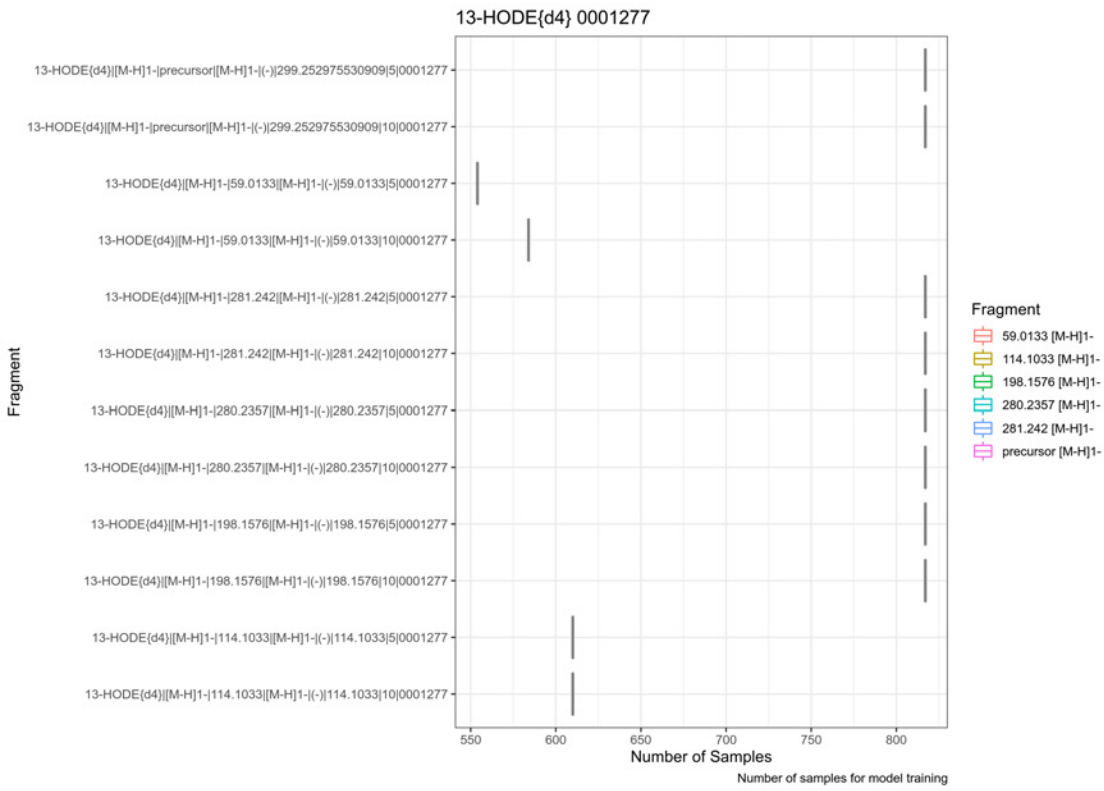

Figure 55. Number of samples used for training per combination Id

# 1.12. 13-HOTrE [M-H]1- 0001341

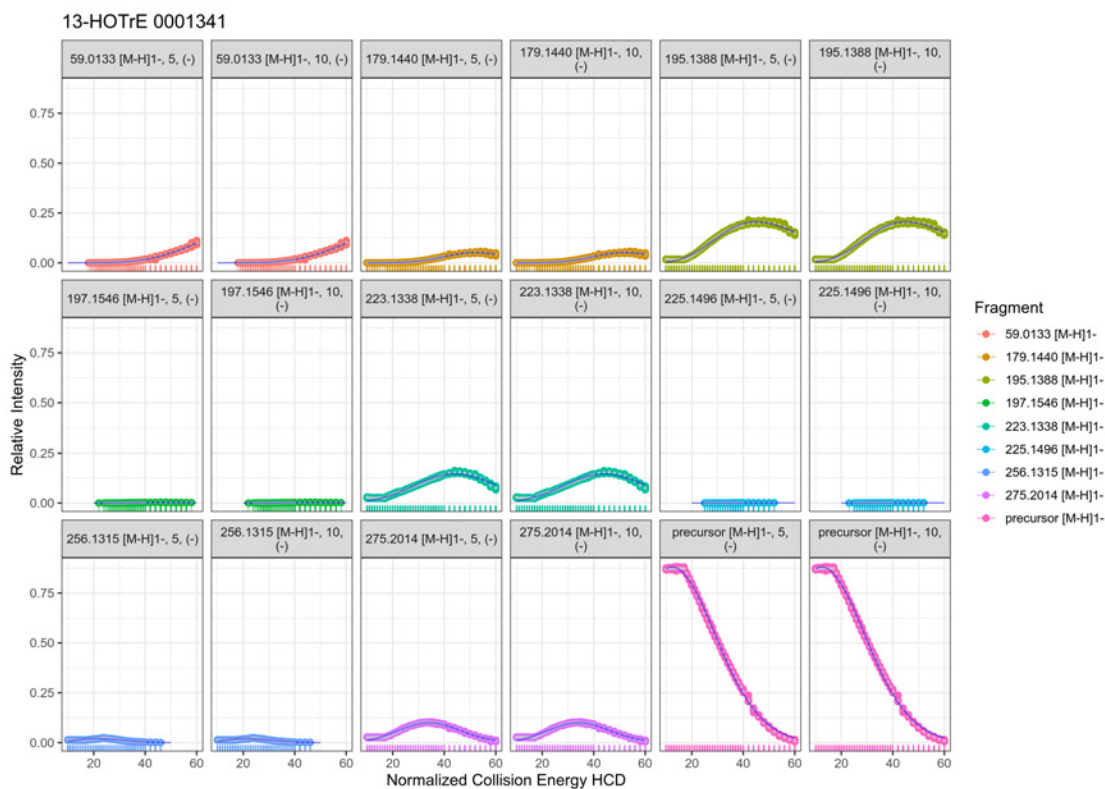

Figure 56. Nonlinear fit

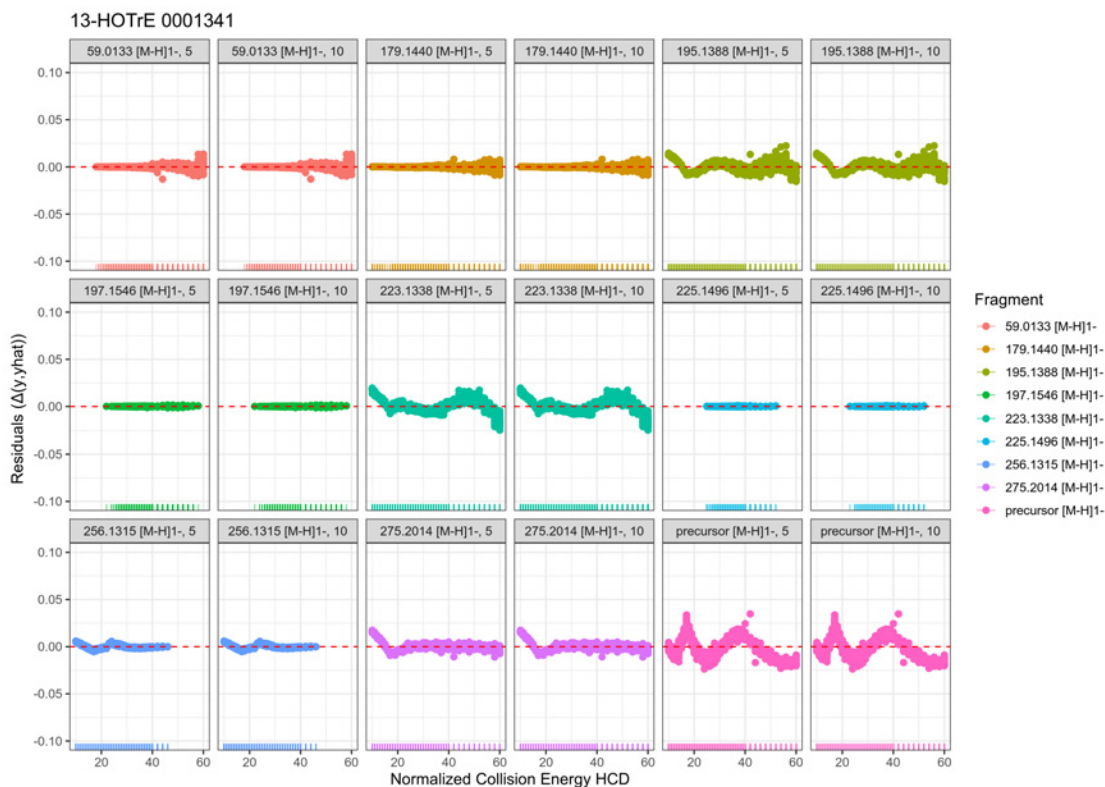

Figure 57. Residuals of nonlinear fit

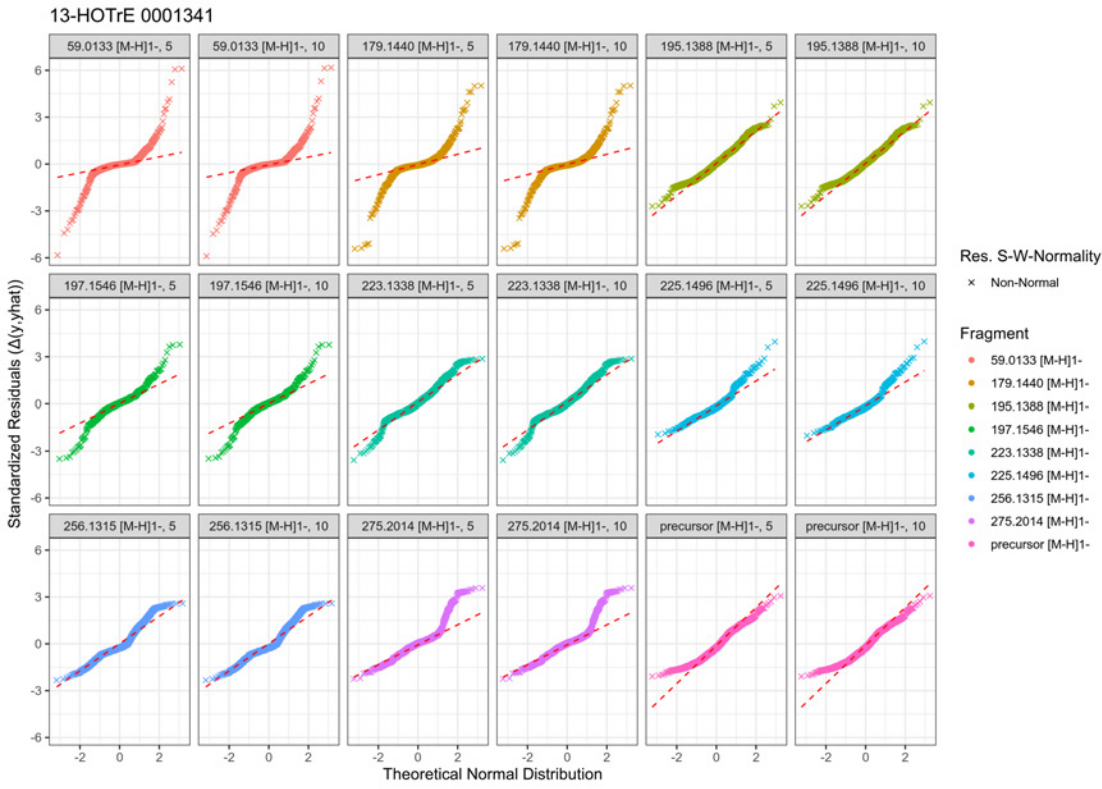

Figure 58. Quantile-quantile plot of residuals

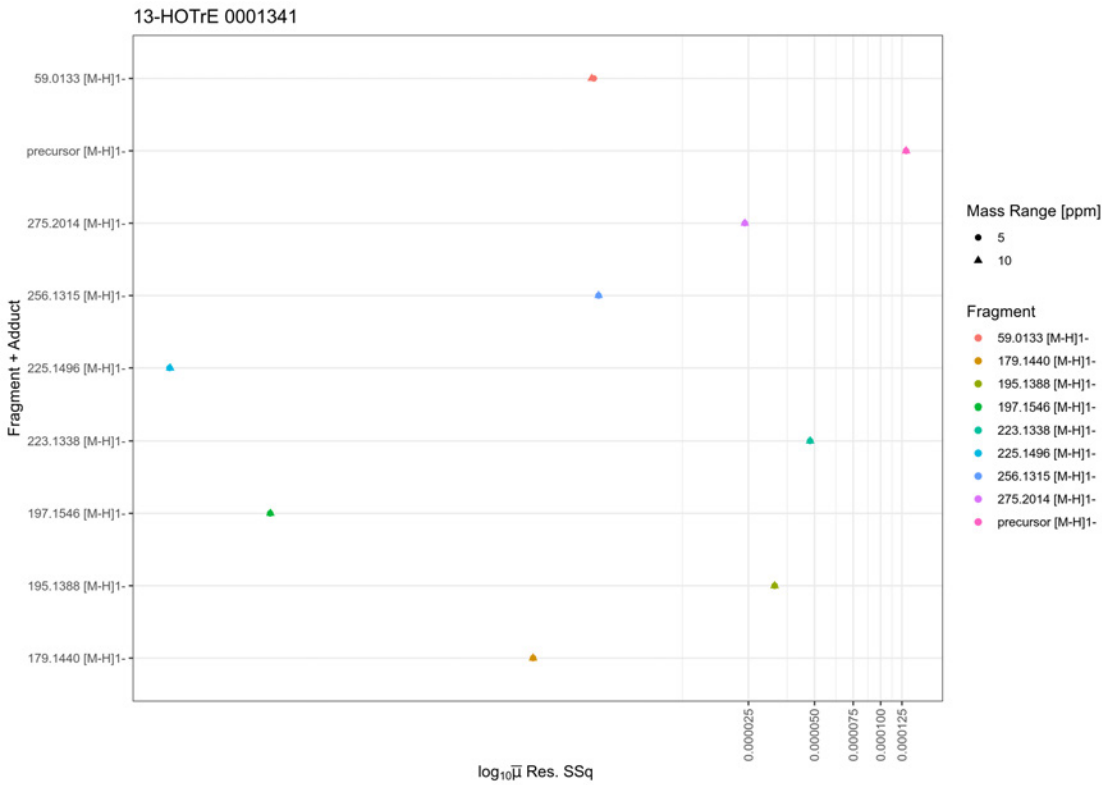

Figure 59. Normalized sum-of-squares of the residuals

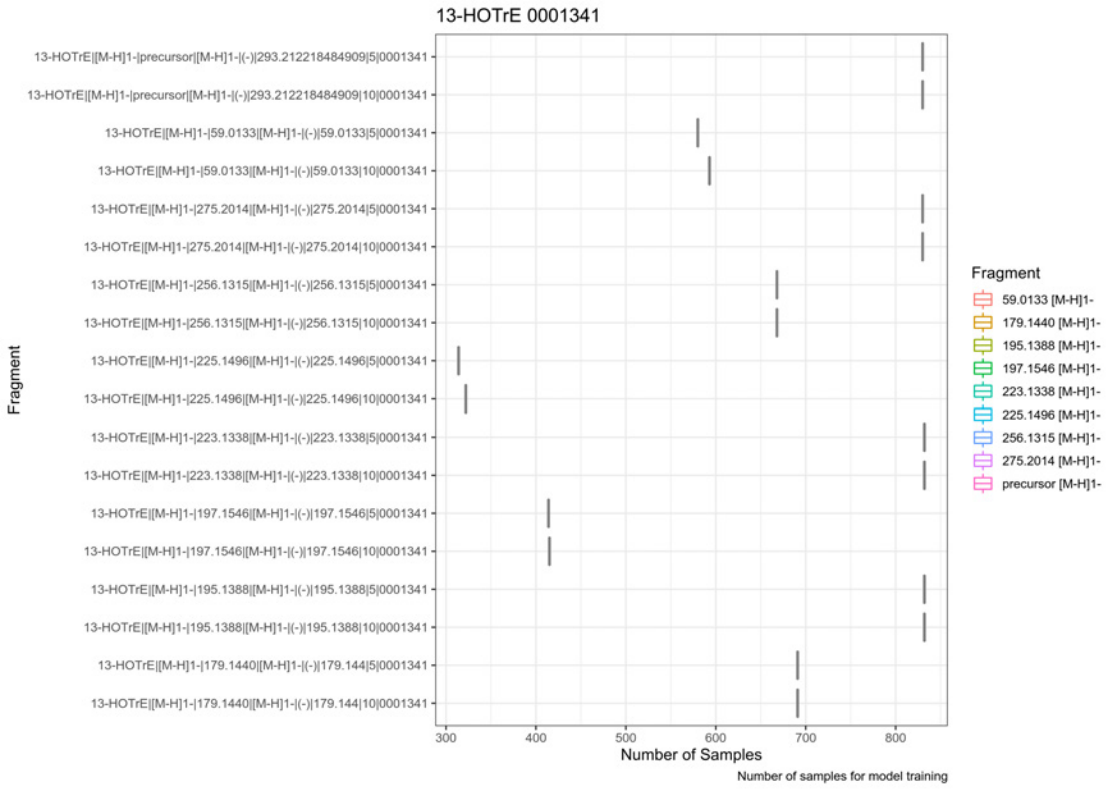

Figure 60. Number of samples used for training per combination Id

# 1.13. 14(15)-EET{d11} [M-H]1- 0001305

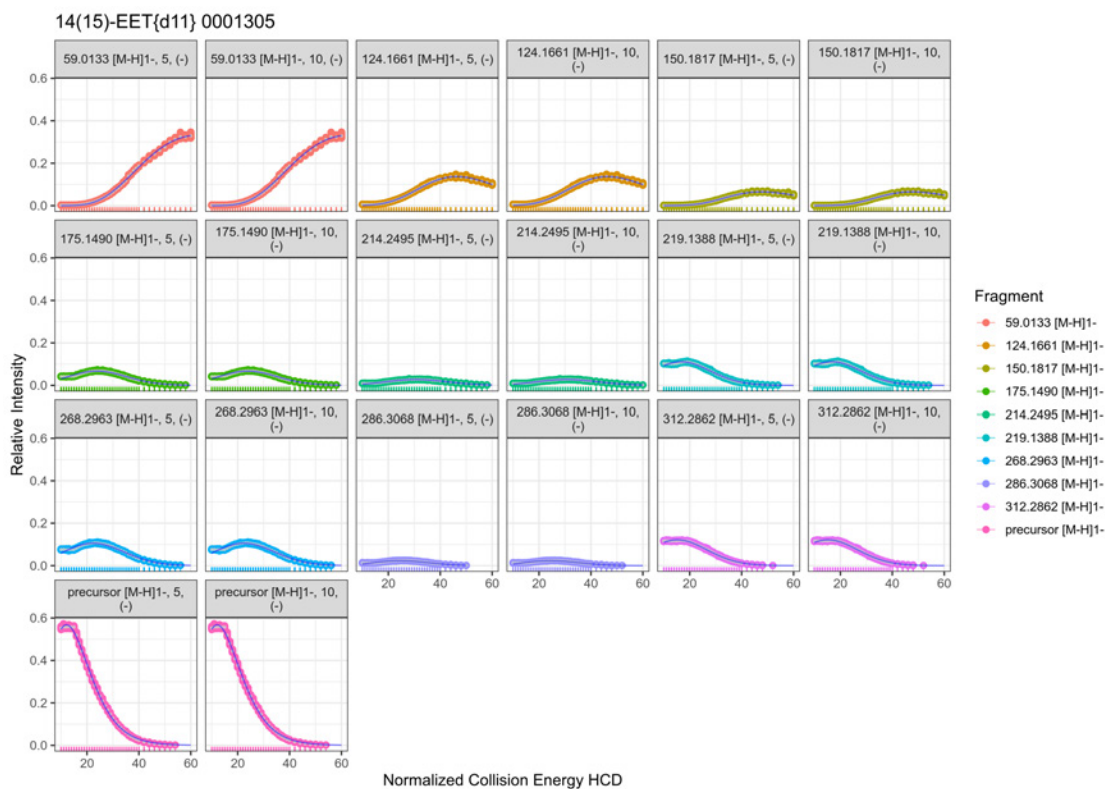

Figure 61. Nonlinear fit

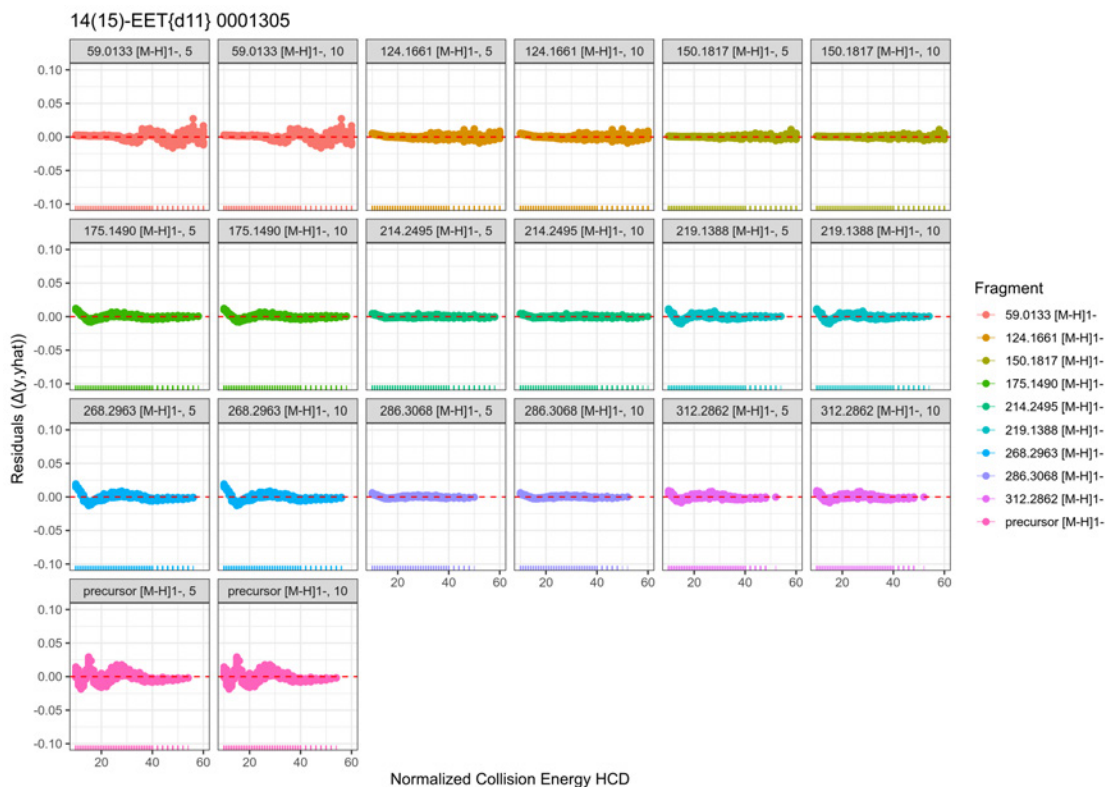

Figure 62. Residuals of nonlinear fit

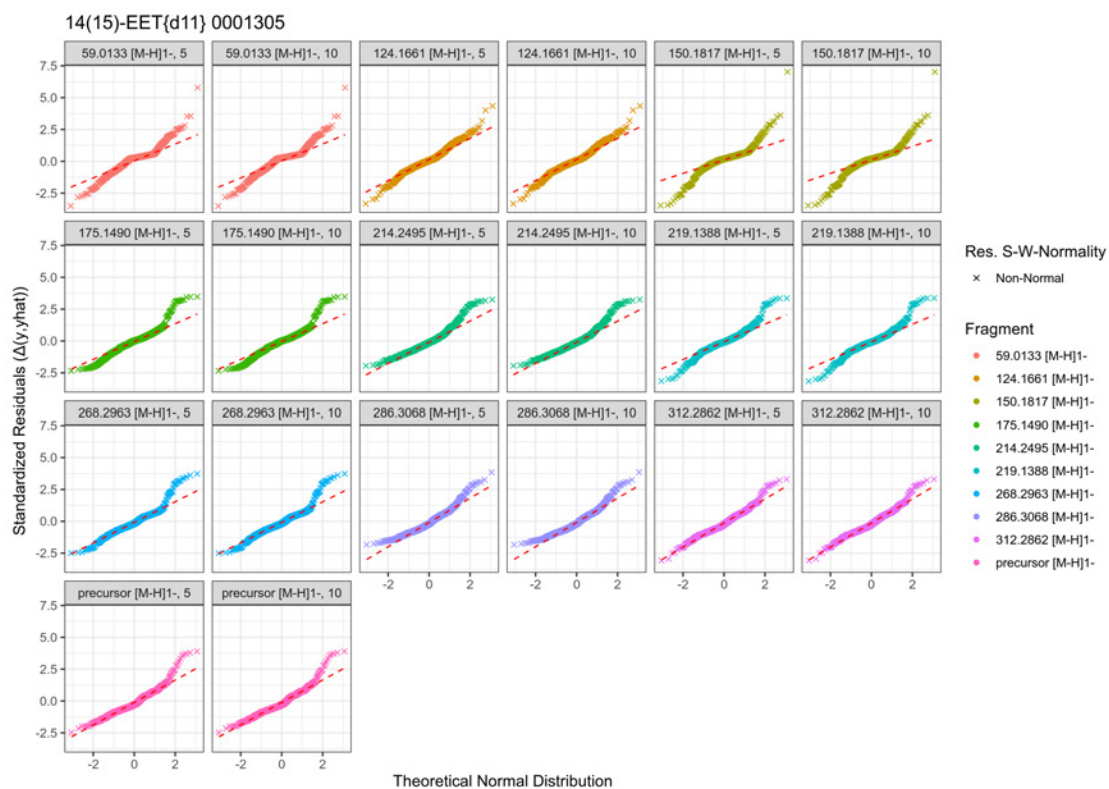

Figure 63. Quantile-quantile plot of residuals

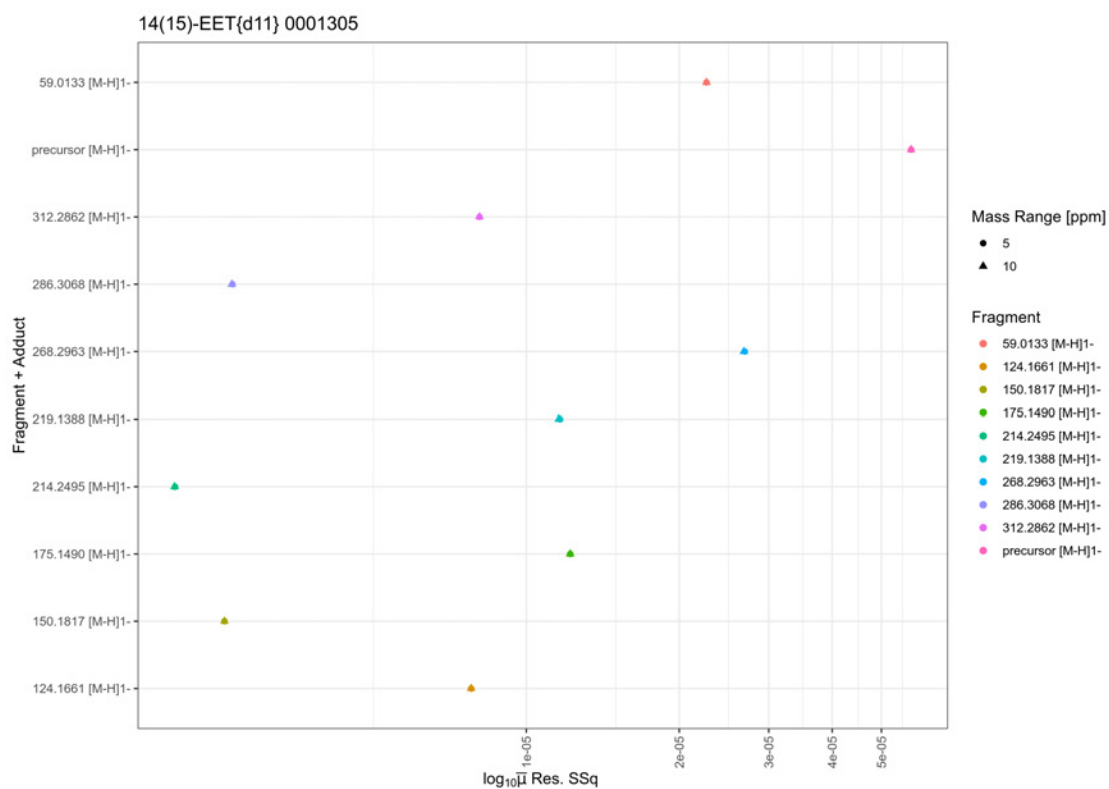

Figure 64. Normalized sum-of-squares of the residuals



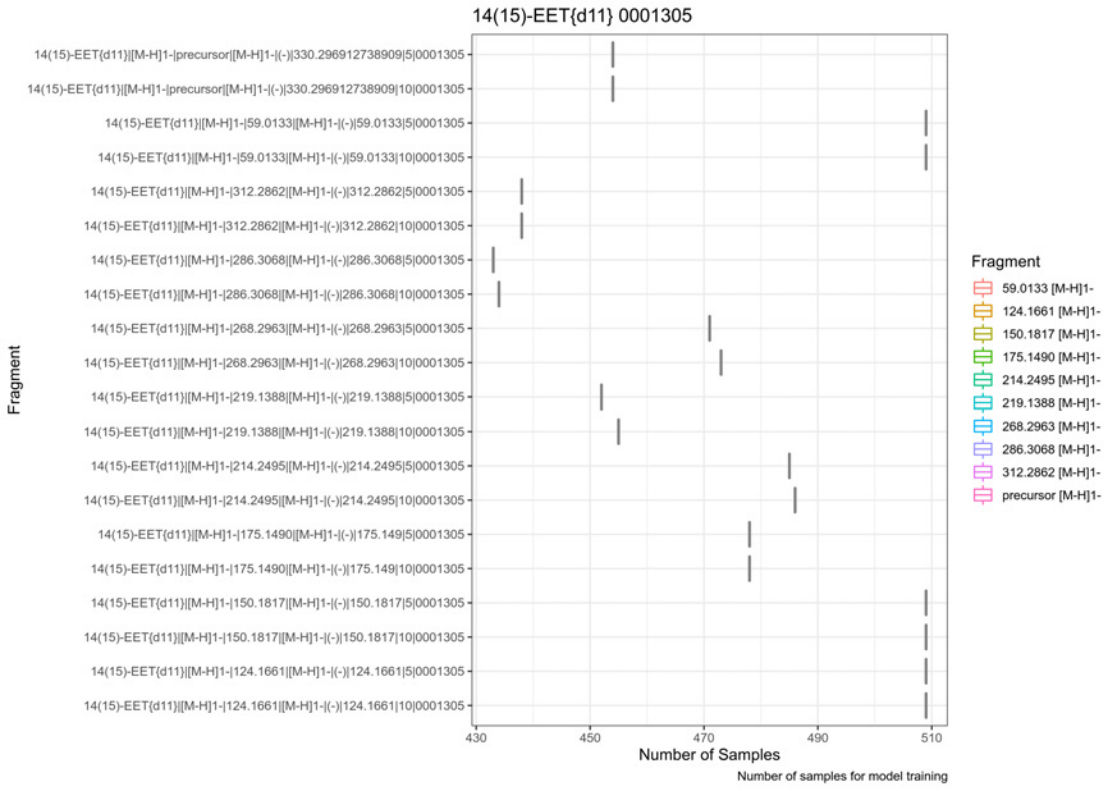

Figure 65. Number of samples used for training per combination Id

# 1.14. 14(15)-EpETE [M-H]1- 0001285

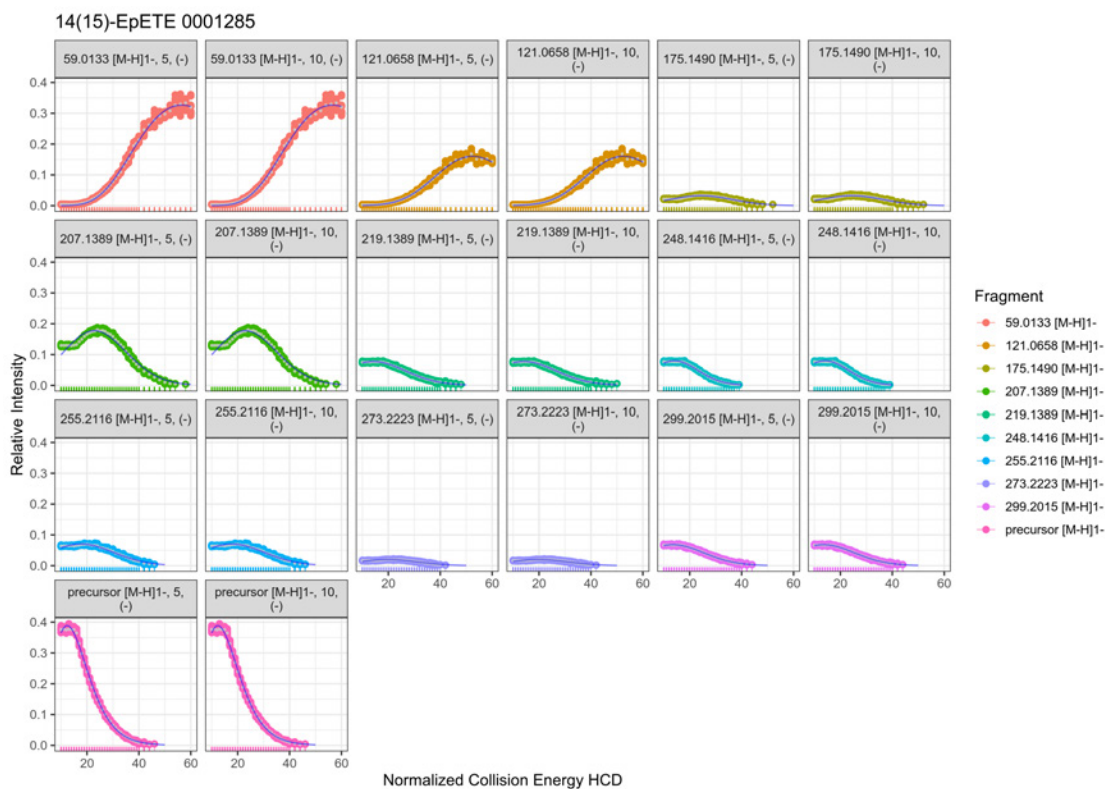

Figure 66. Nonlinear fit

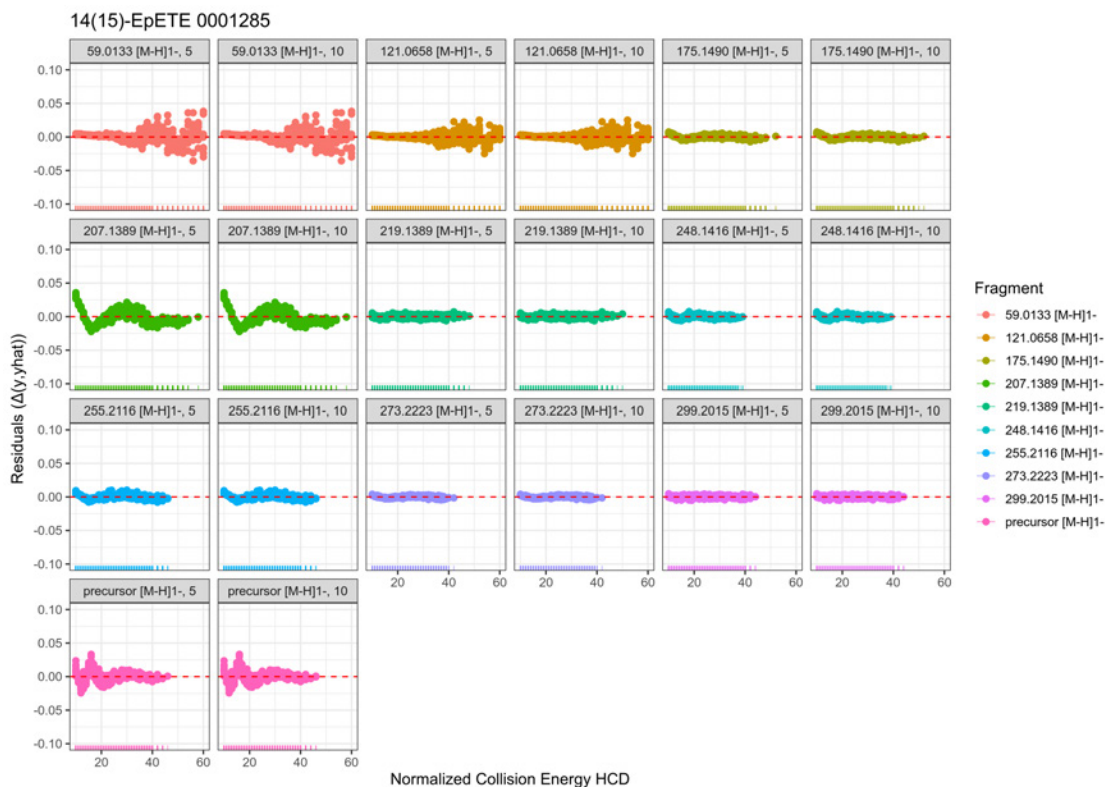

Figure 67. Residuals of nonlinear fit

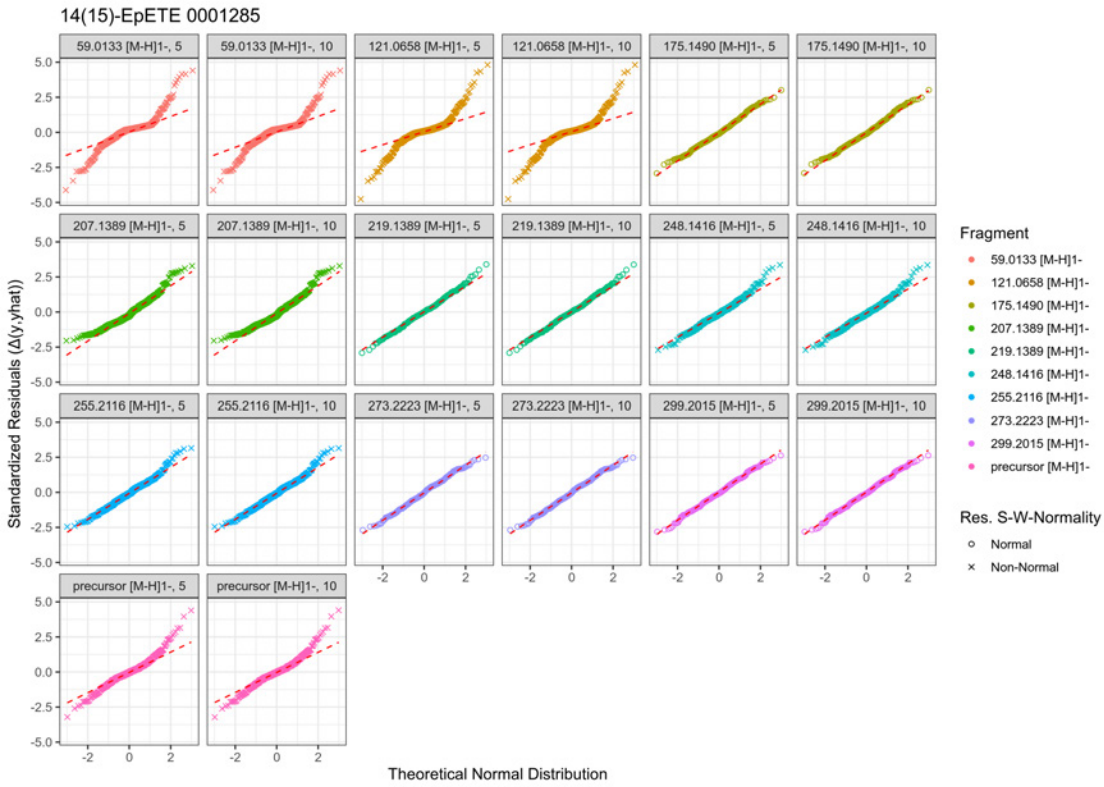

Figure 68. Quantile-quantile plot of residuals

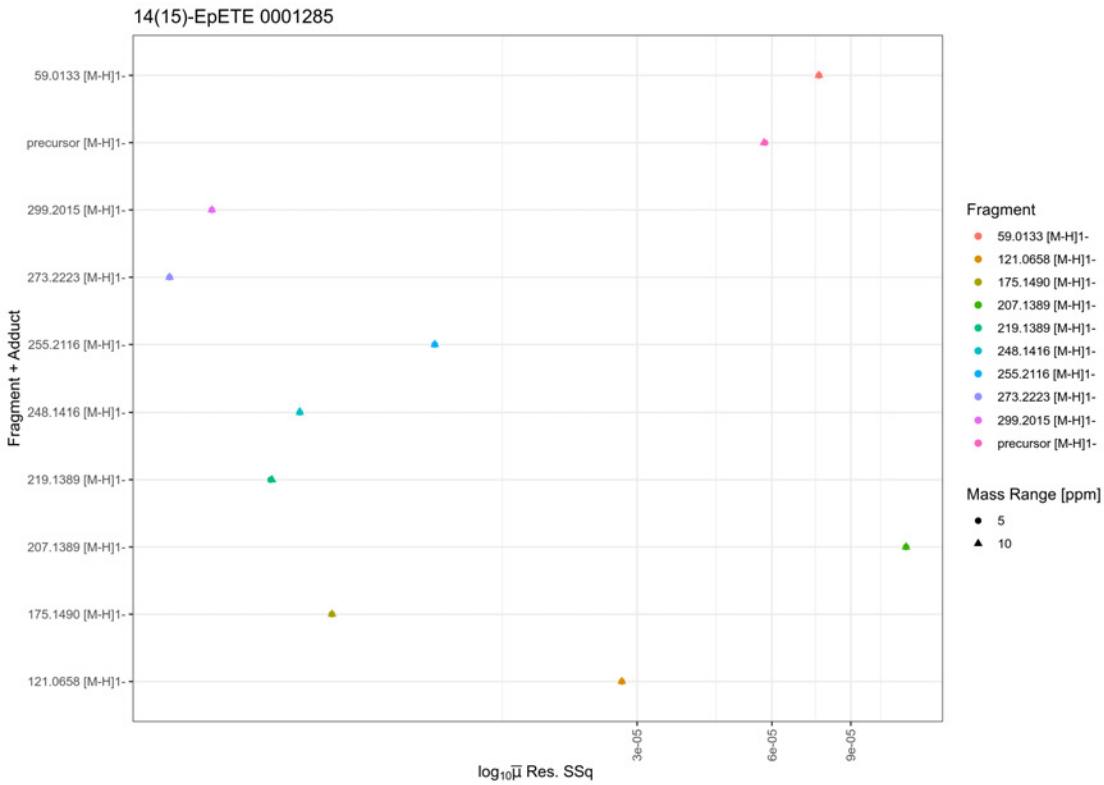

Figure 69. Normalized sum-of-squares of the residuals

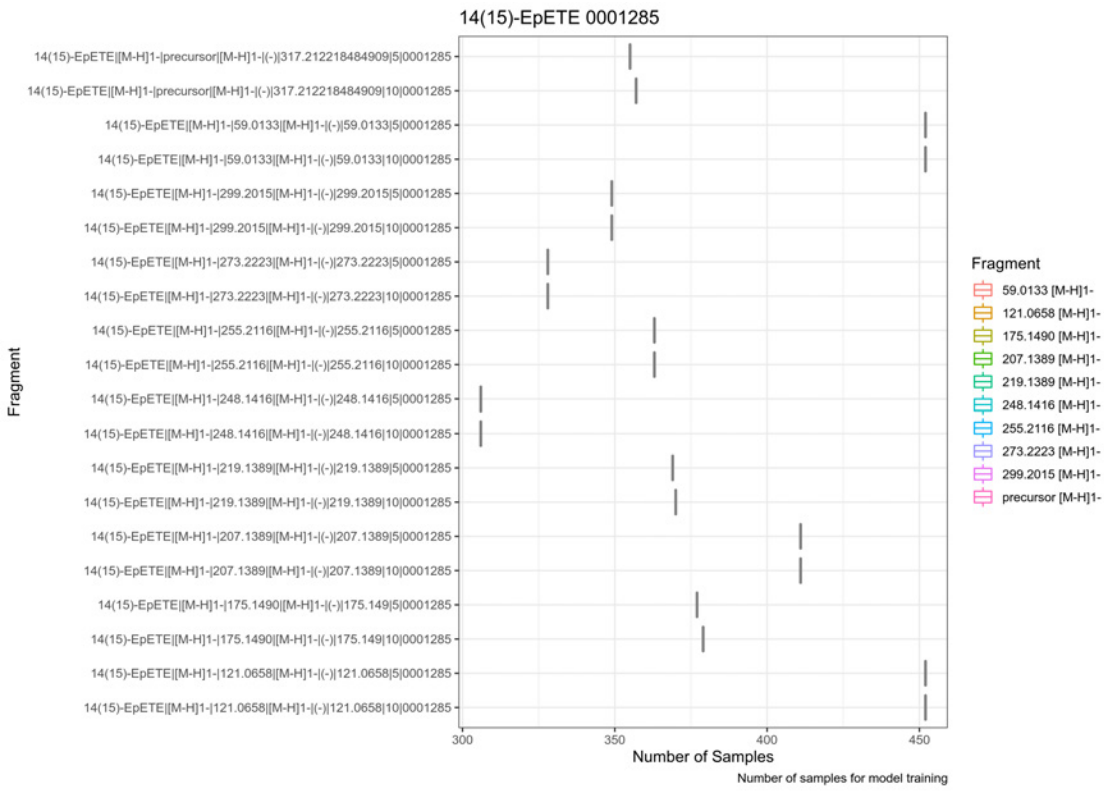

Figure 70. Number of samples used for training per combination Id

# 1.15. 14,15-DHET{d11} [M-H]1- 0000155

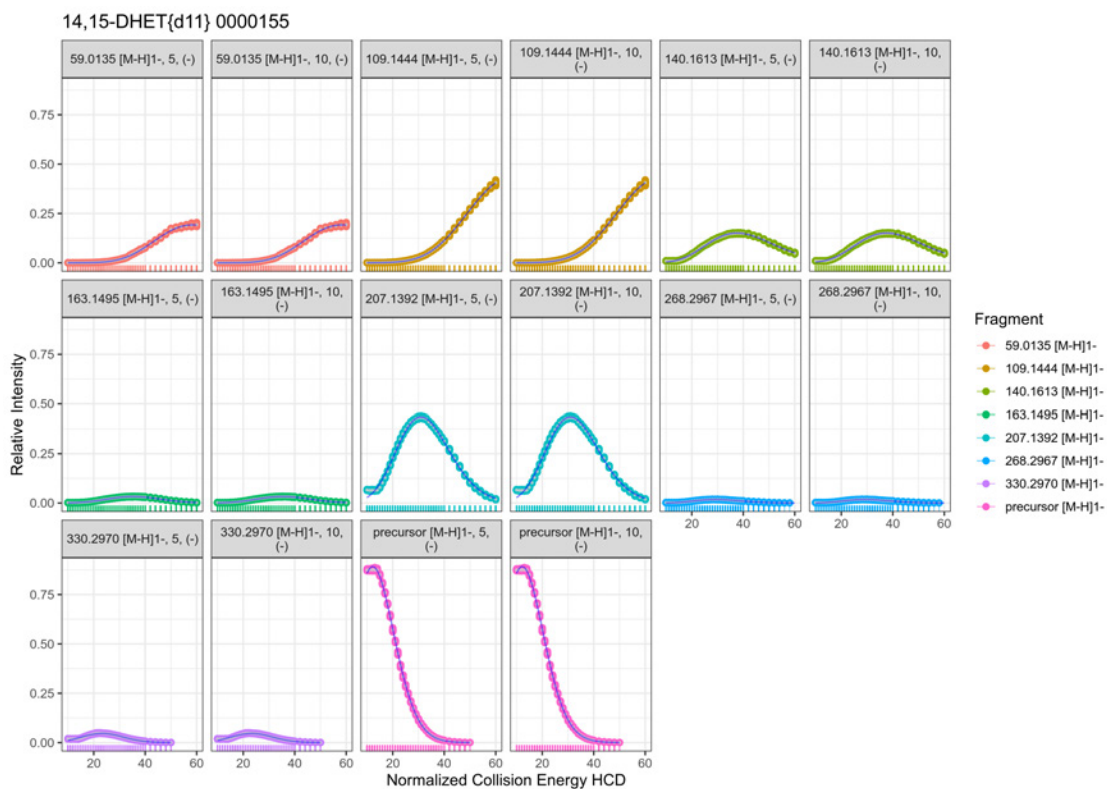

Figure 71. Nonlinear fit

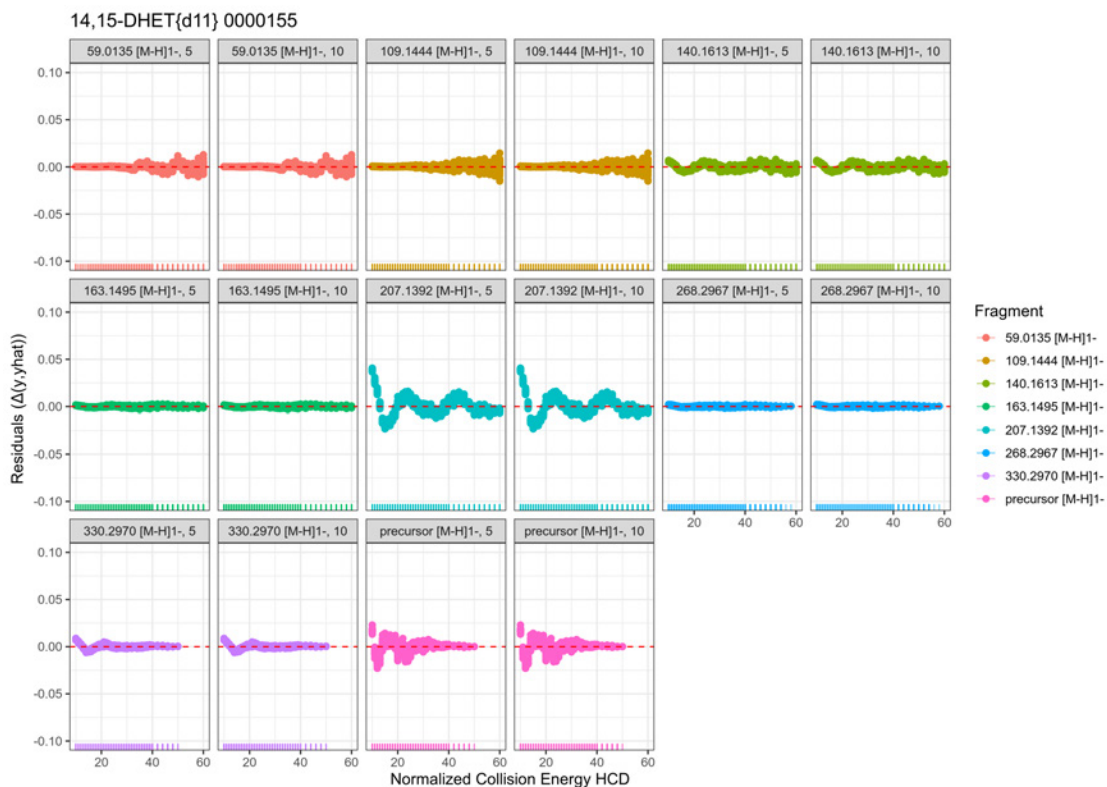

Figure 72. Residuals of nonlinear fit

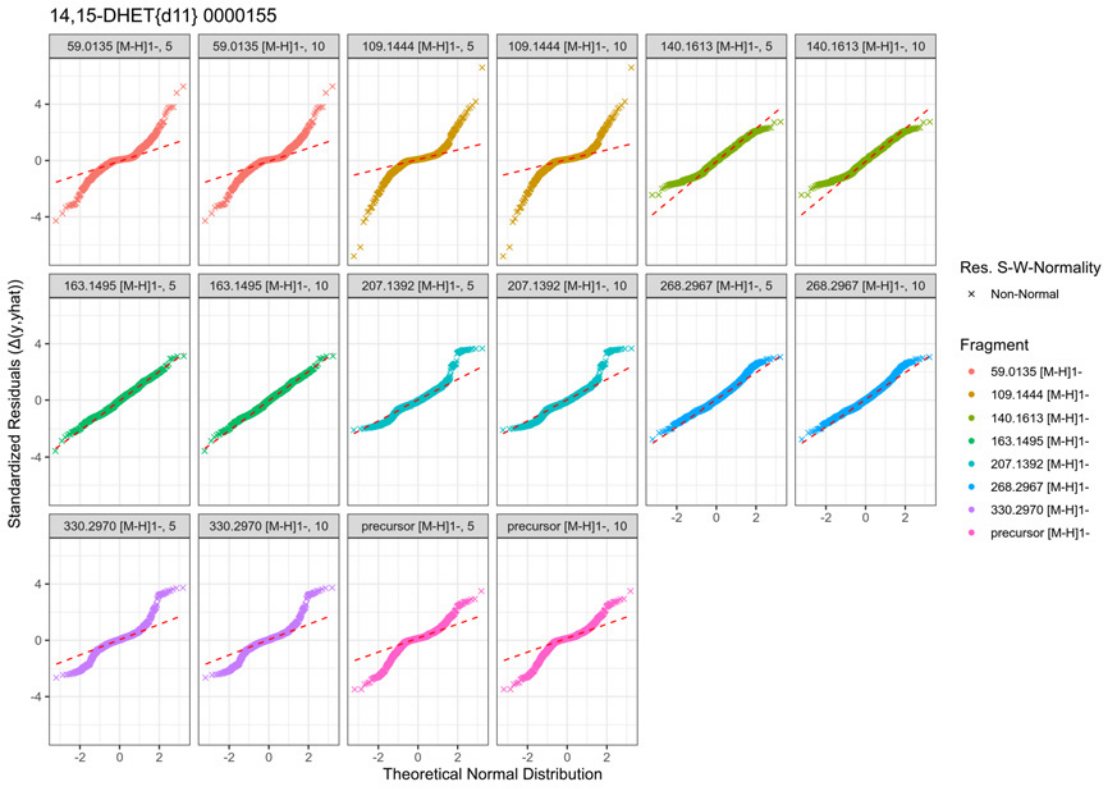

Figure 73. Quantile-quantile plot of residuals

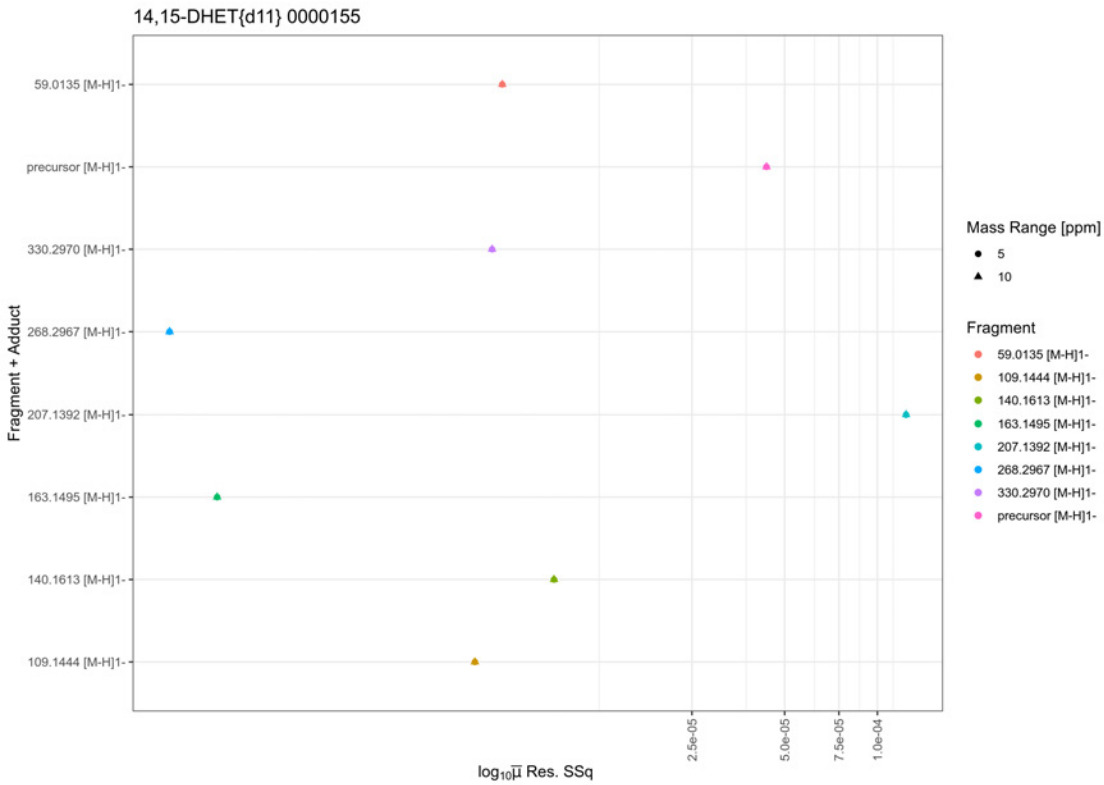

Figure 74. Normalized sum-of-squares of the residuals



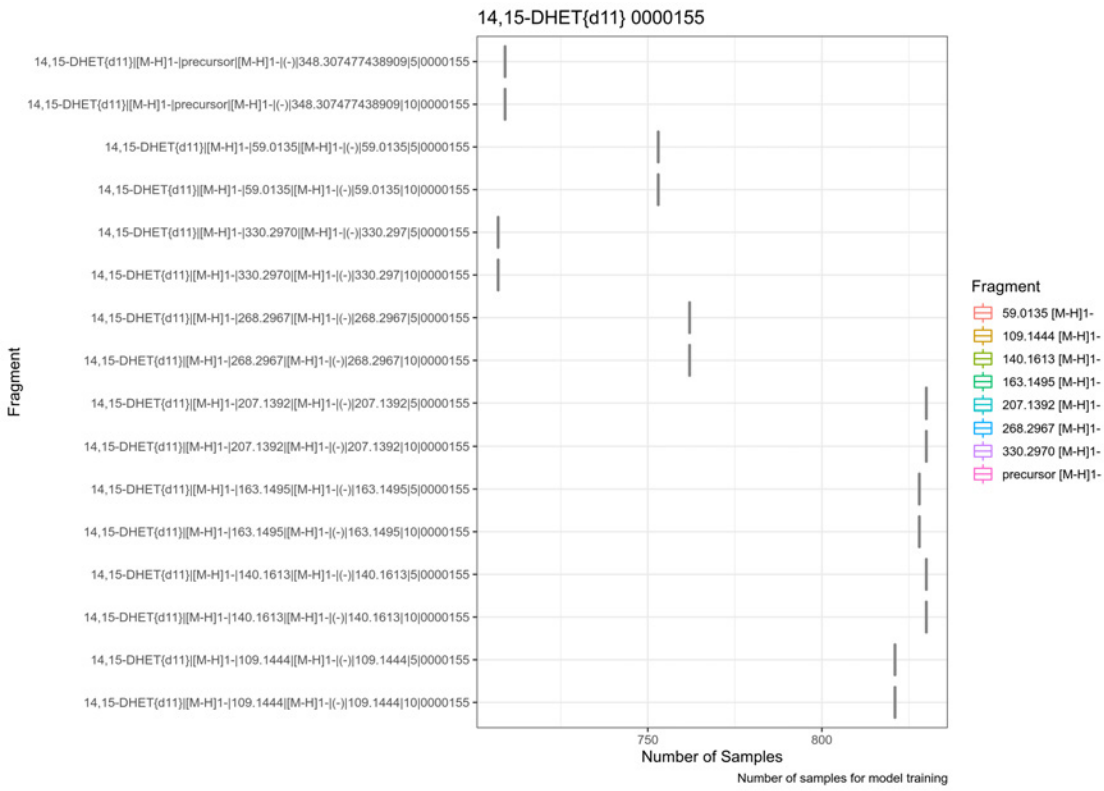

Figure 75. Number of samples used for training per combination Id

# 1.16. 15-HEPE [M-H]1- 0000139

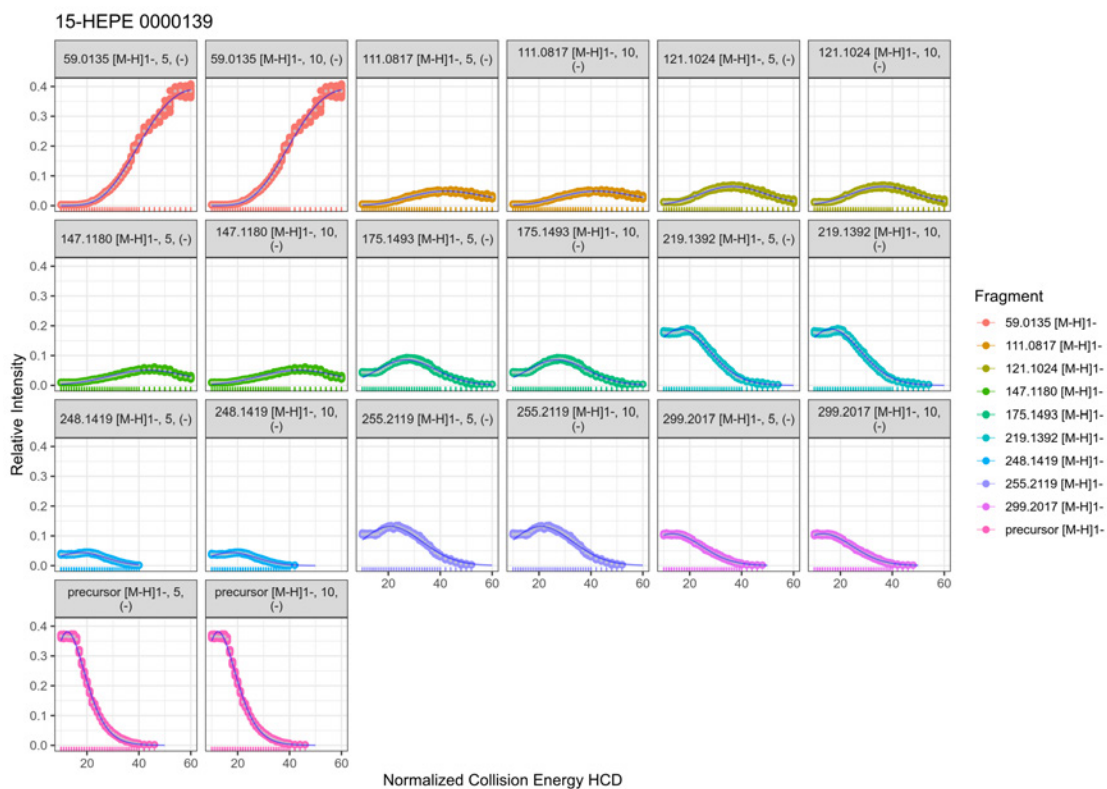

Figure 76. Nonlinear fit

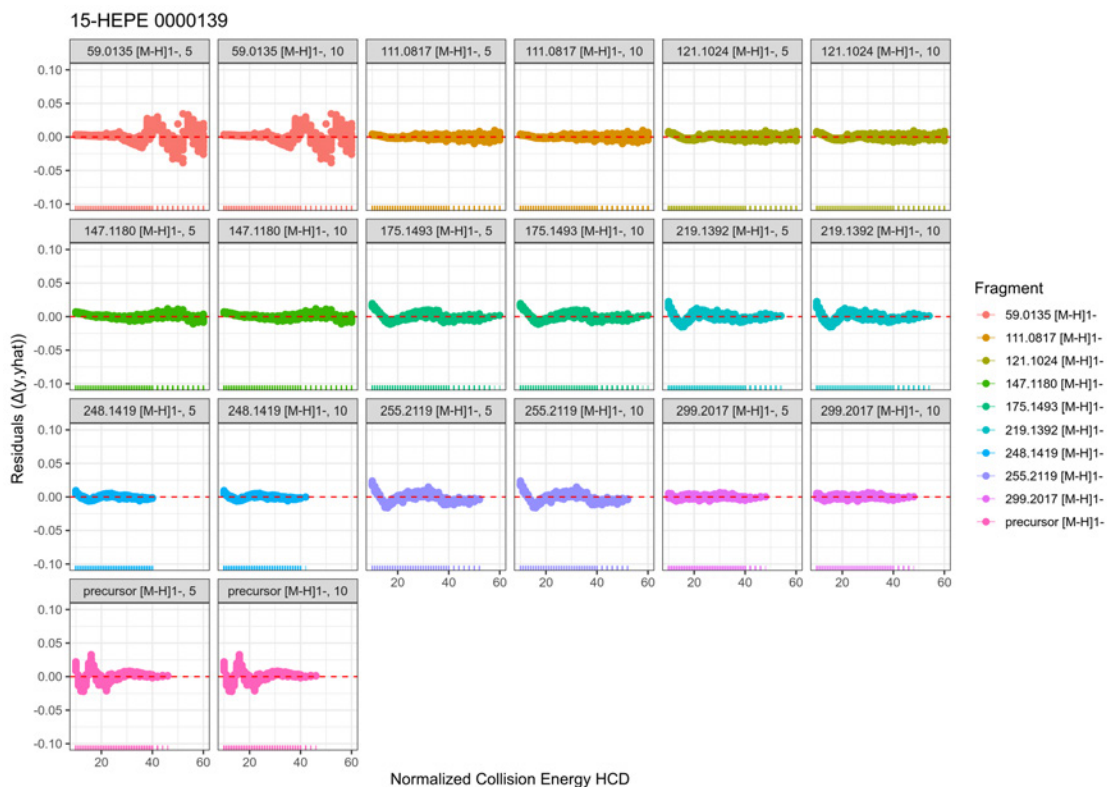

Figure 77. Residuals of nonlinear fit

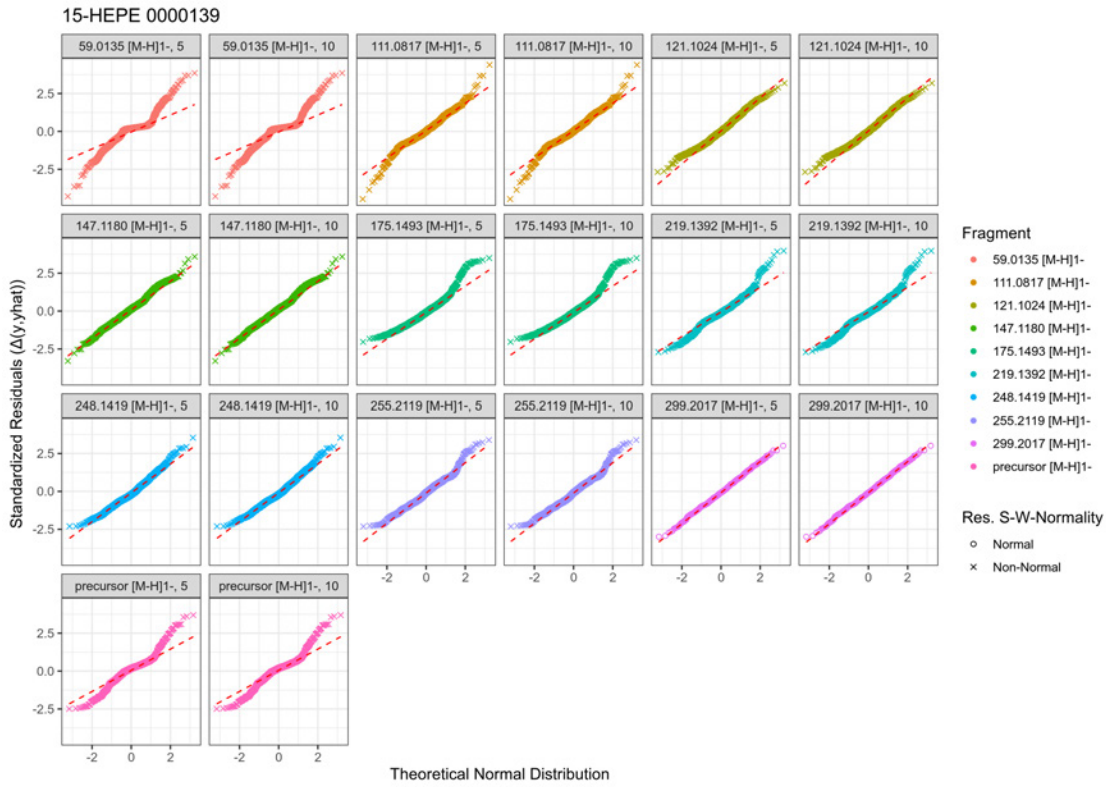

Figure 78. Quantile-quantile plot of residuals

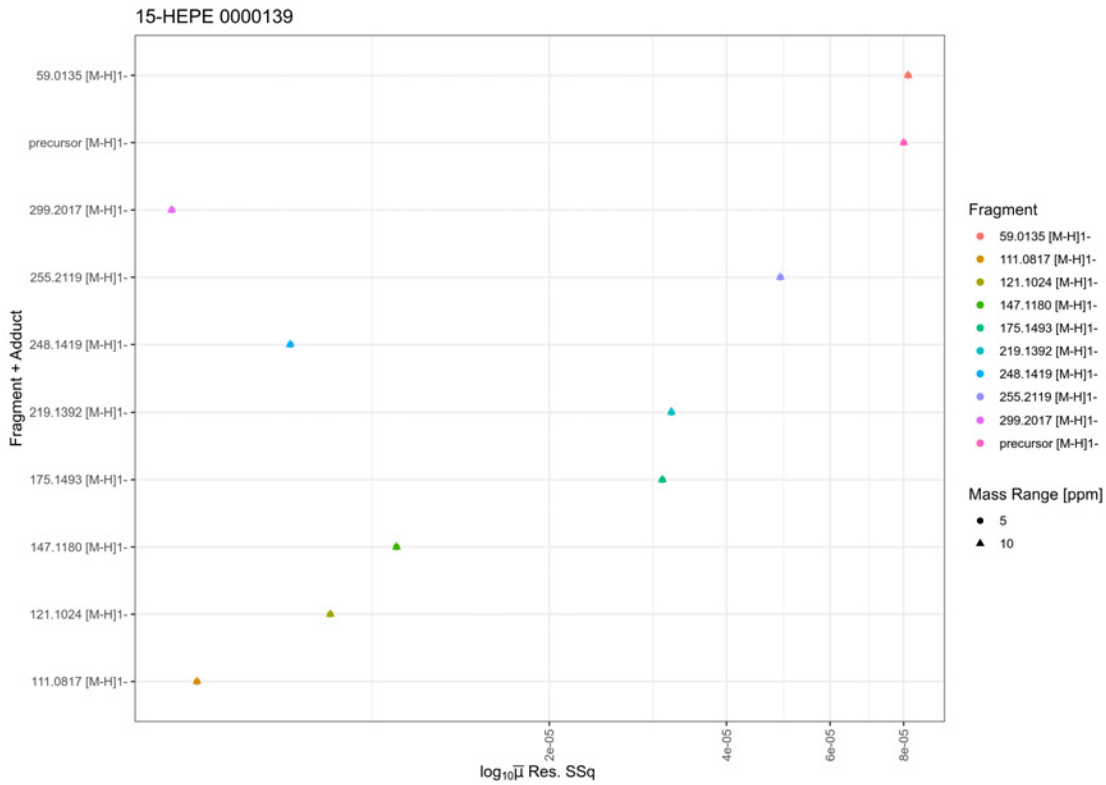

Figure 79. Normalized sum-of-squares of the residuals

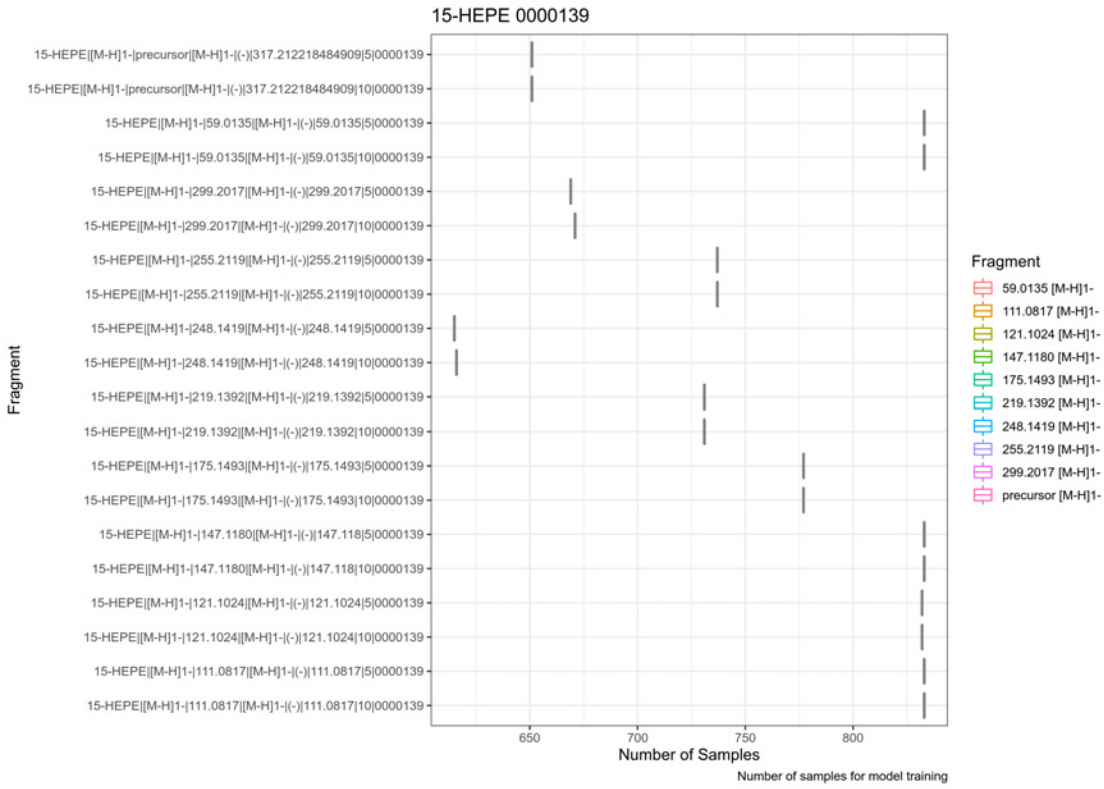

Figure 80. Number of samples used for training per combination Id

# 1.17. 15-HETE{d8} [M-H]1- 0001329

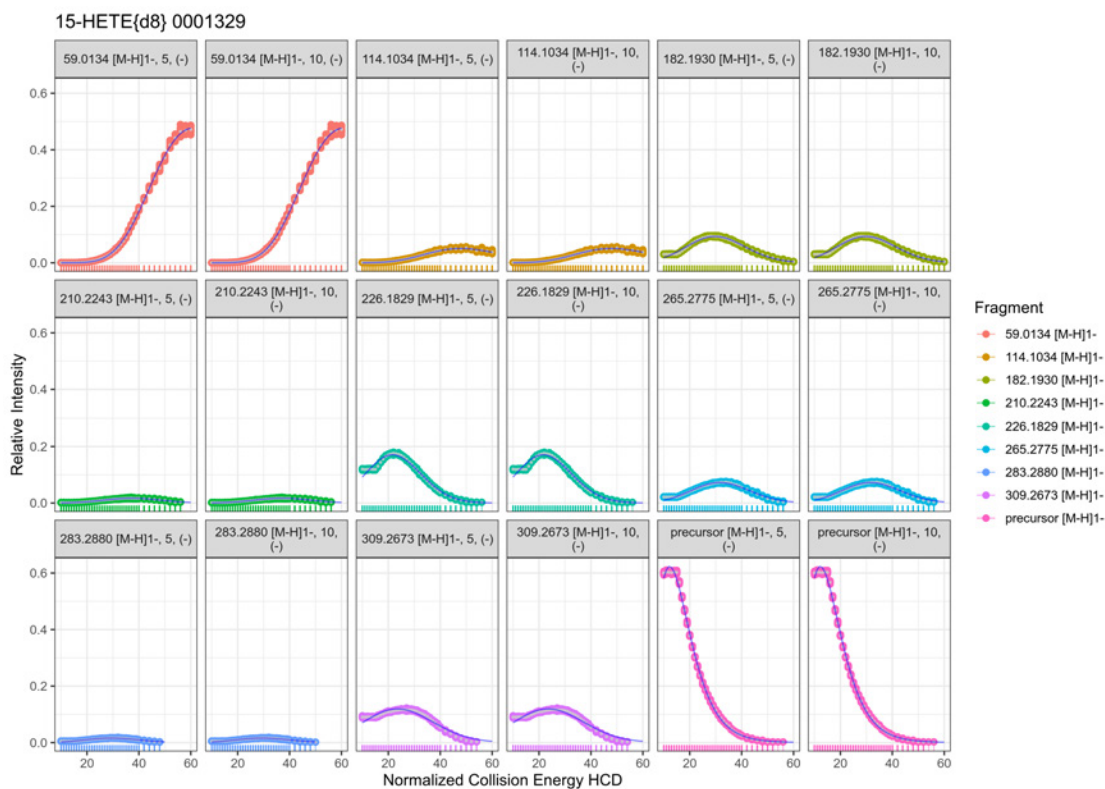

Figure 81. Nonlinear fit

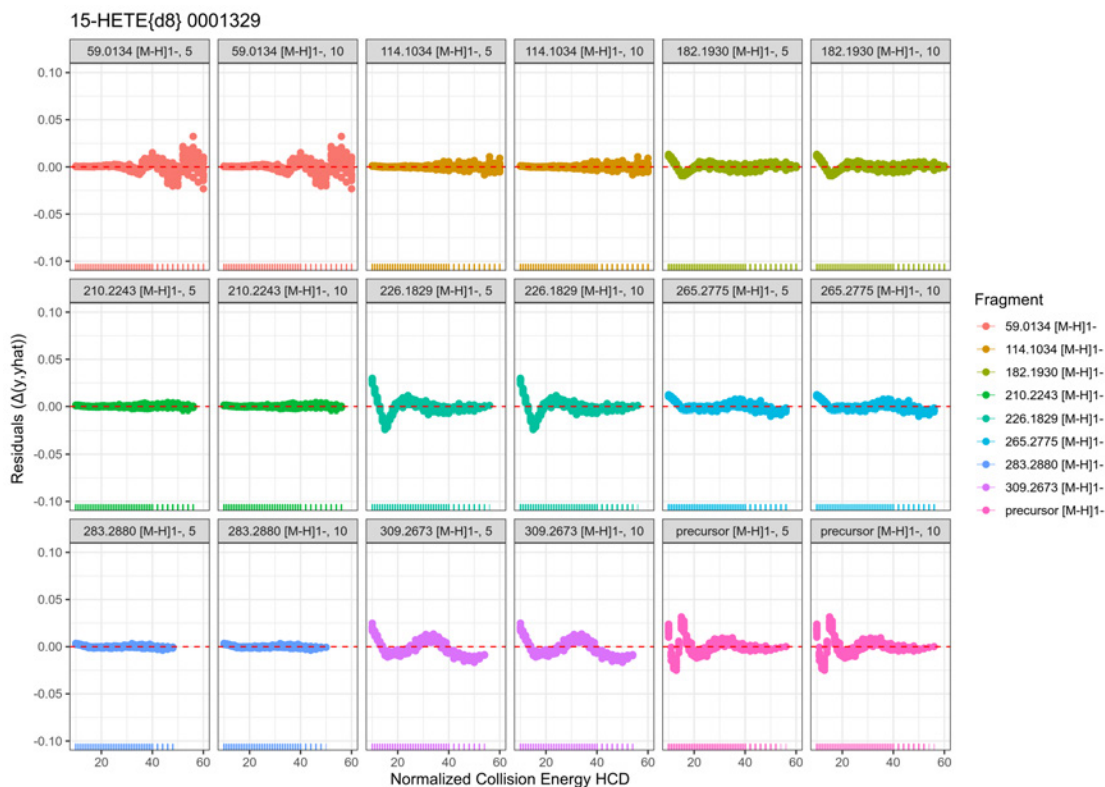

Figure 82. Residuals of nonlinear fit

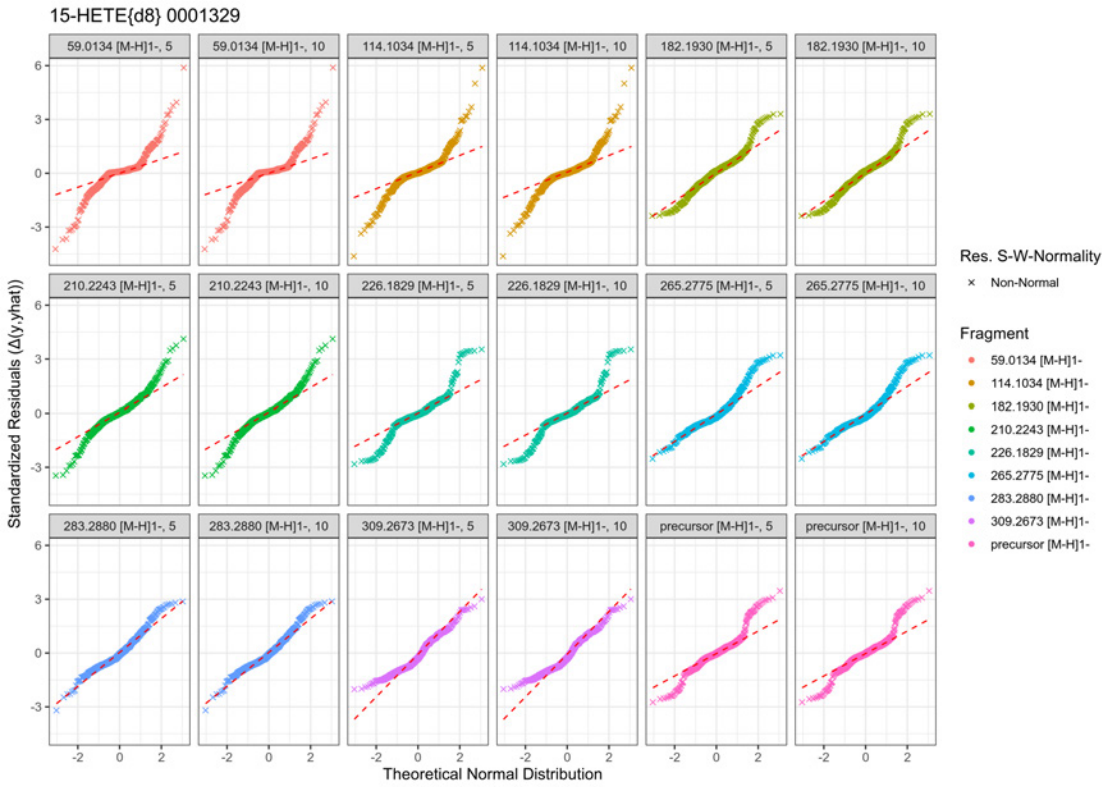

Figure 83. Quantile-quantile plot of residuals

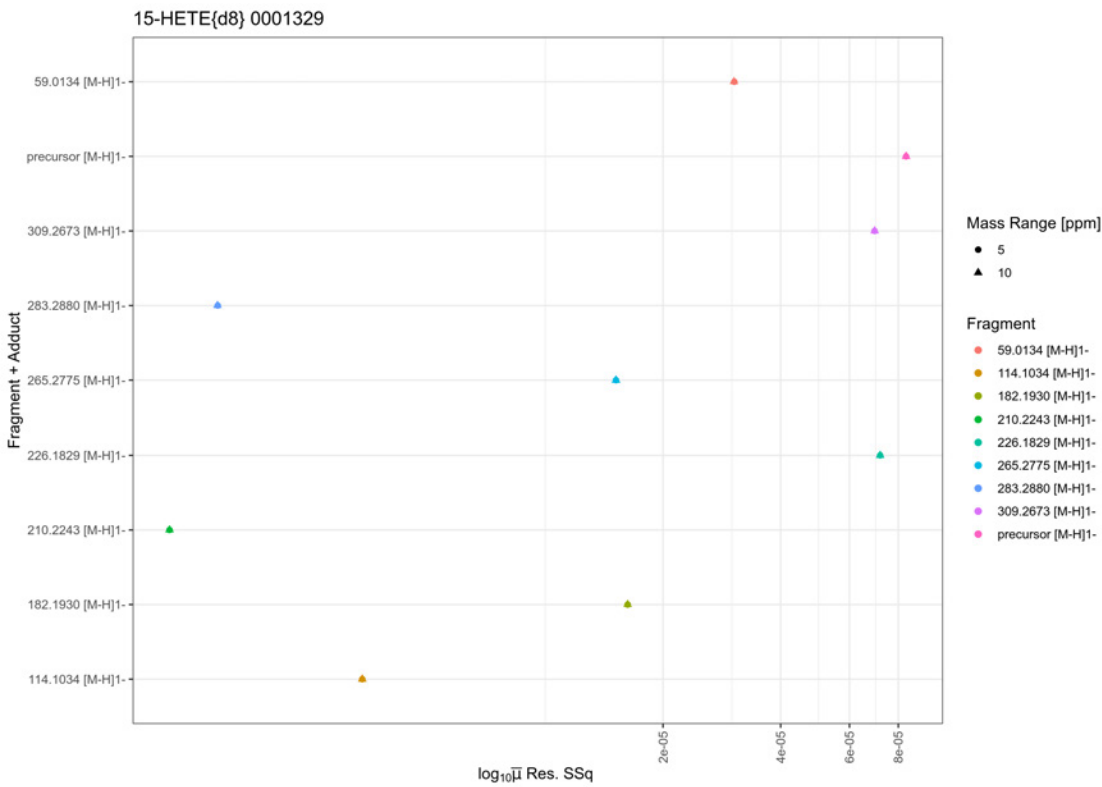

Figure 84. Normalized sum-of-squares of the residuals



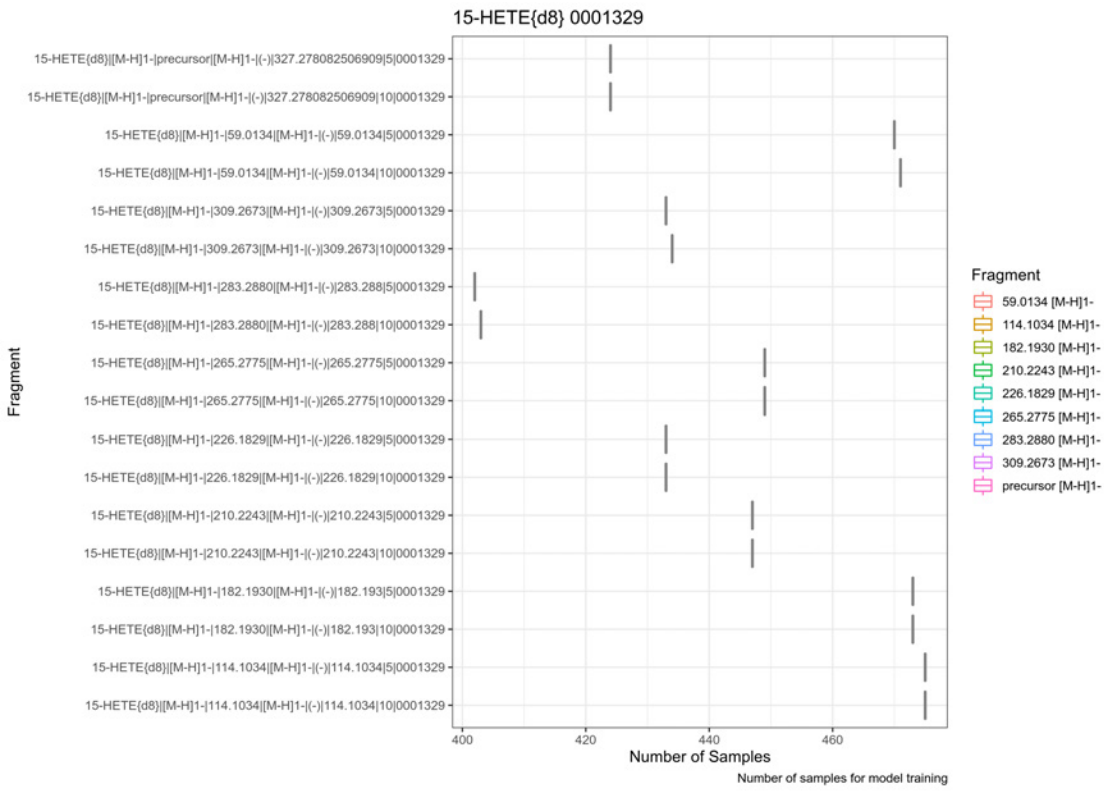

Figure 85. Number of samples used for training per combination Id

# 1.18. 15d-PGJ2{d4} [M-H]1- 0000149

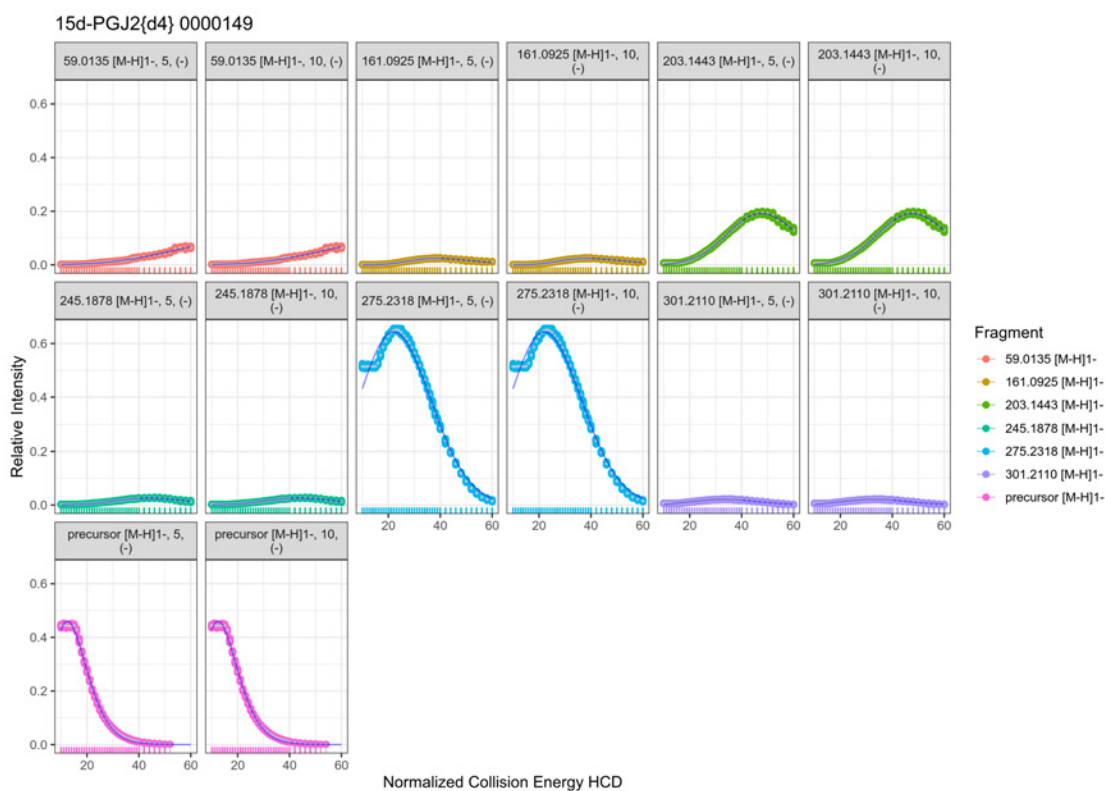

Figure 86. Nonlinear fit

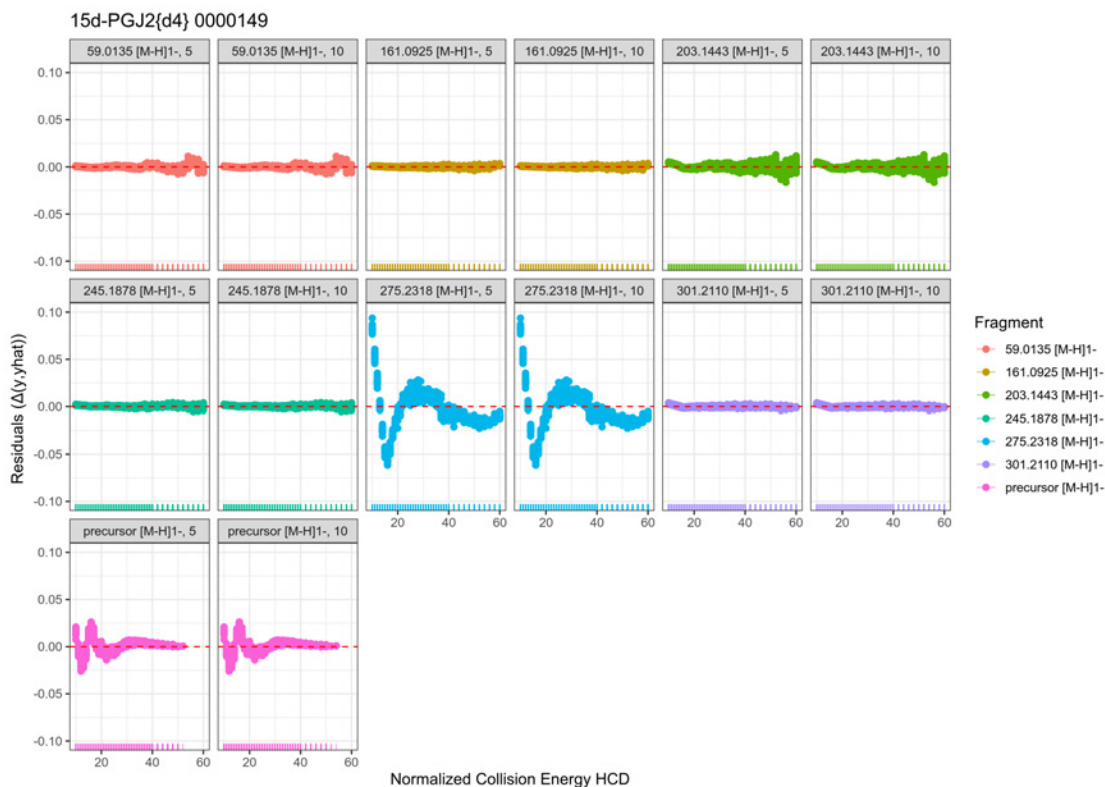

Figure 87. Residuals of nonlinear fit

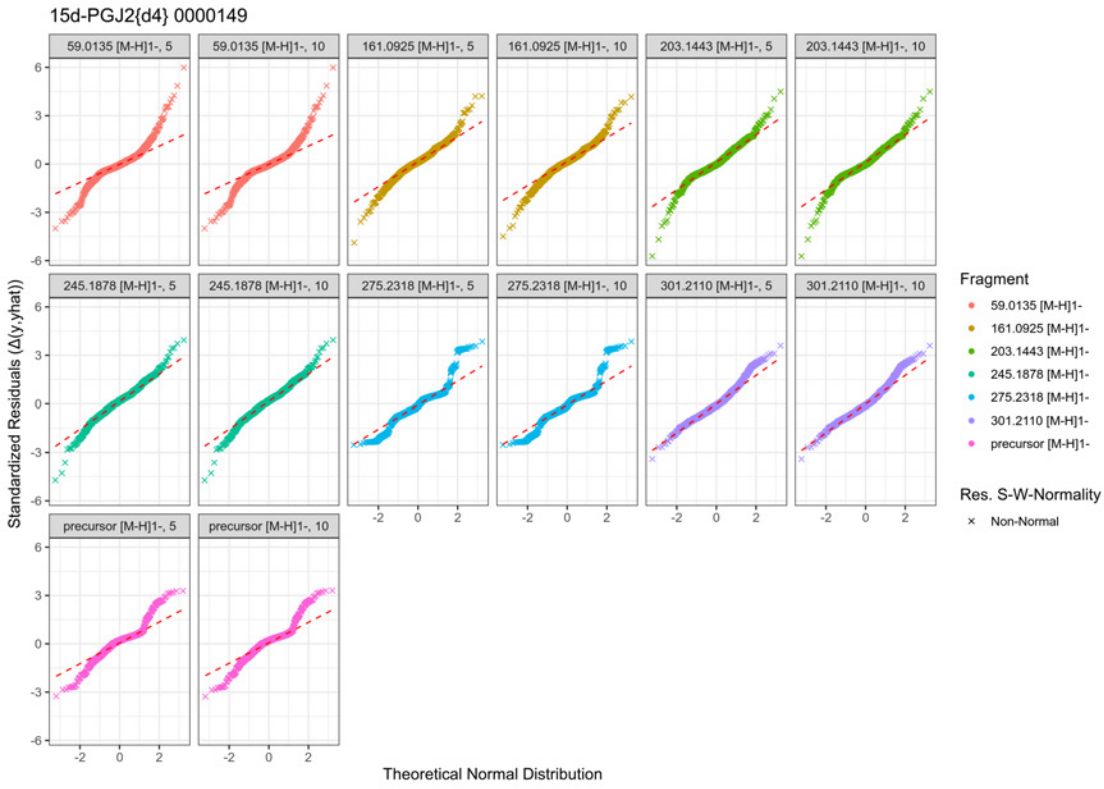

Figure 88. Quantile-quantile plot of residuals

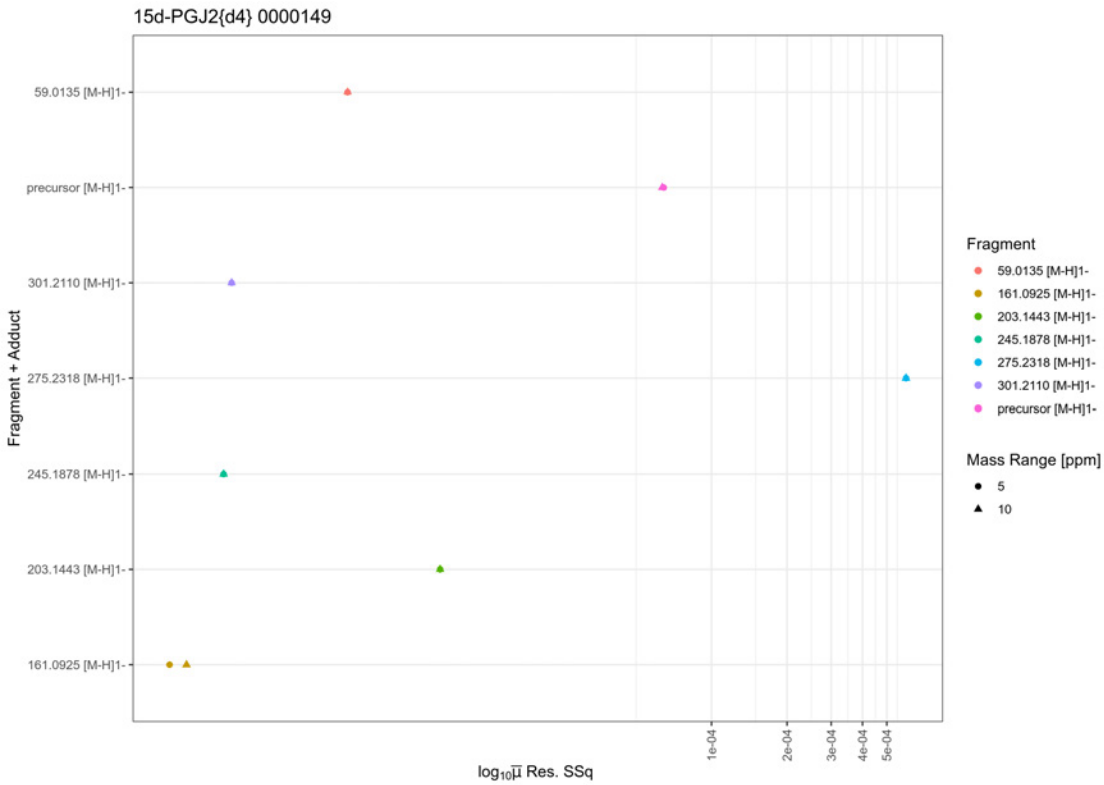

Figure 89. Normalized sum-of-squares of the residuals

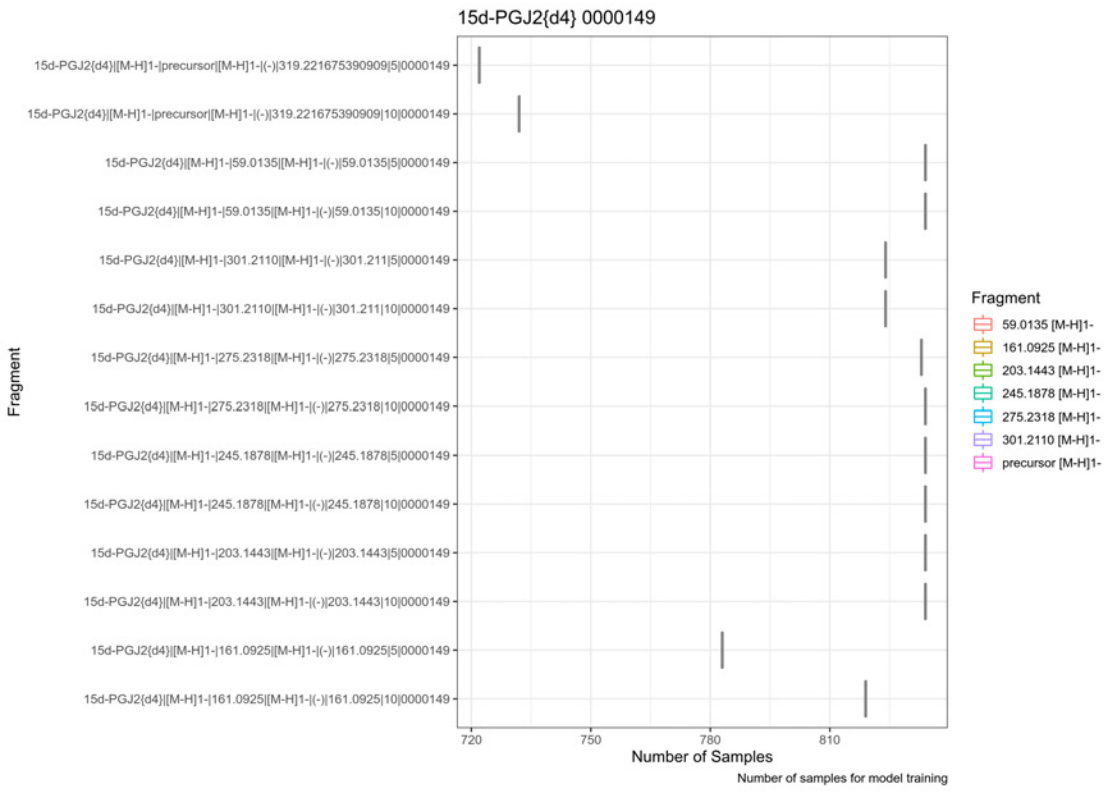

Figure 90. Number of samples used for training per combination Id

# 1.19. 16-HDoHE [M-H]1- 0001271

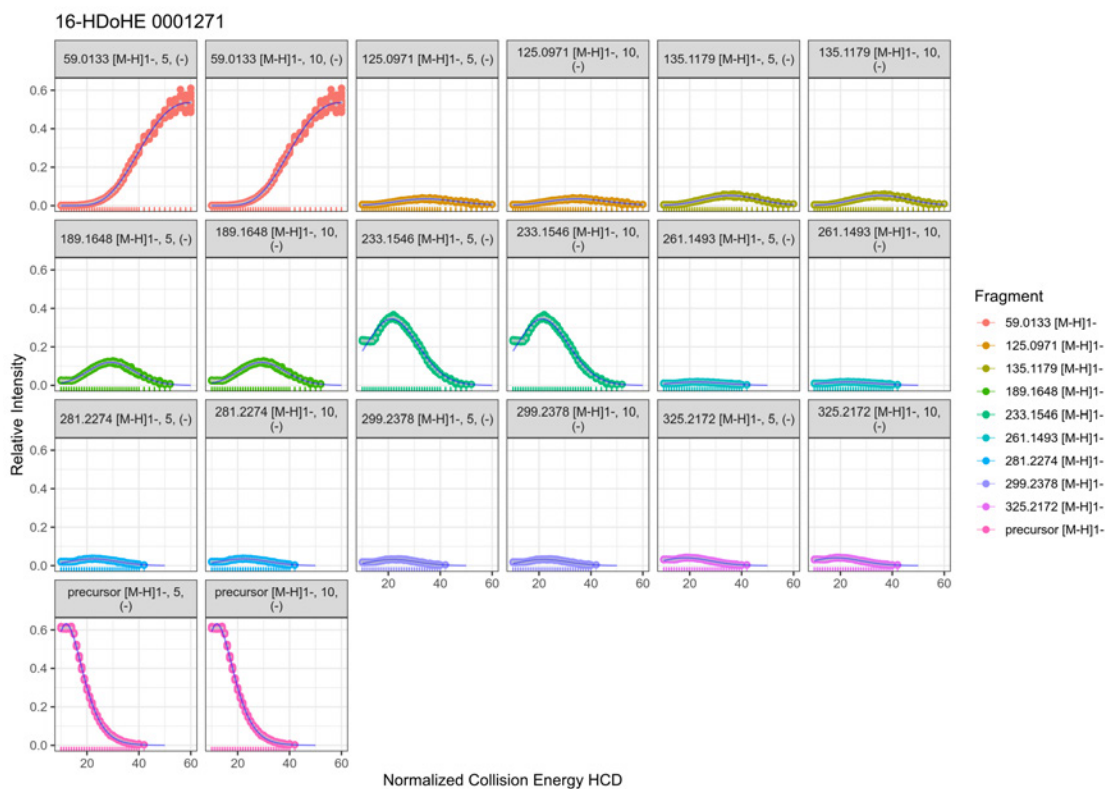

Figure 91. Nonlinear fit

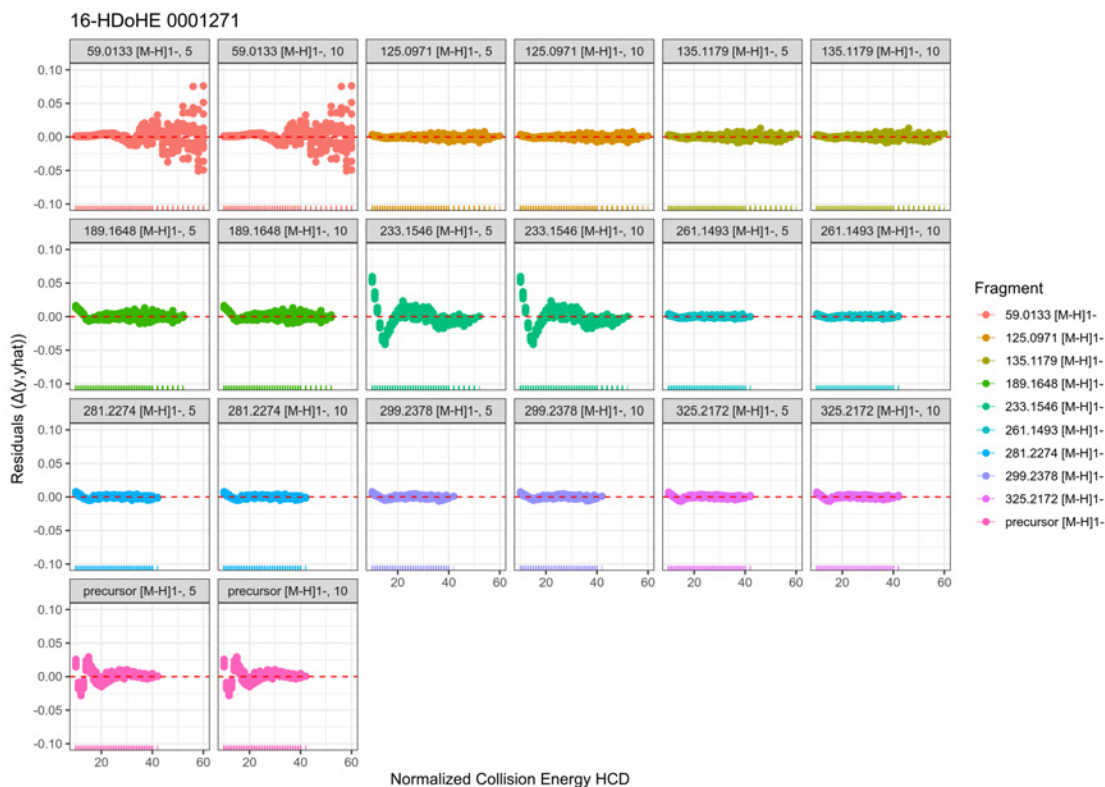

Figure 92. Residuals of nonlinear fit

16-HDoHE 0001271

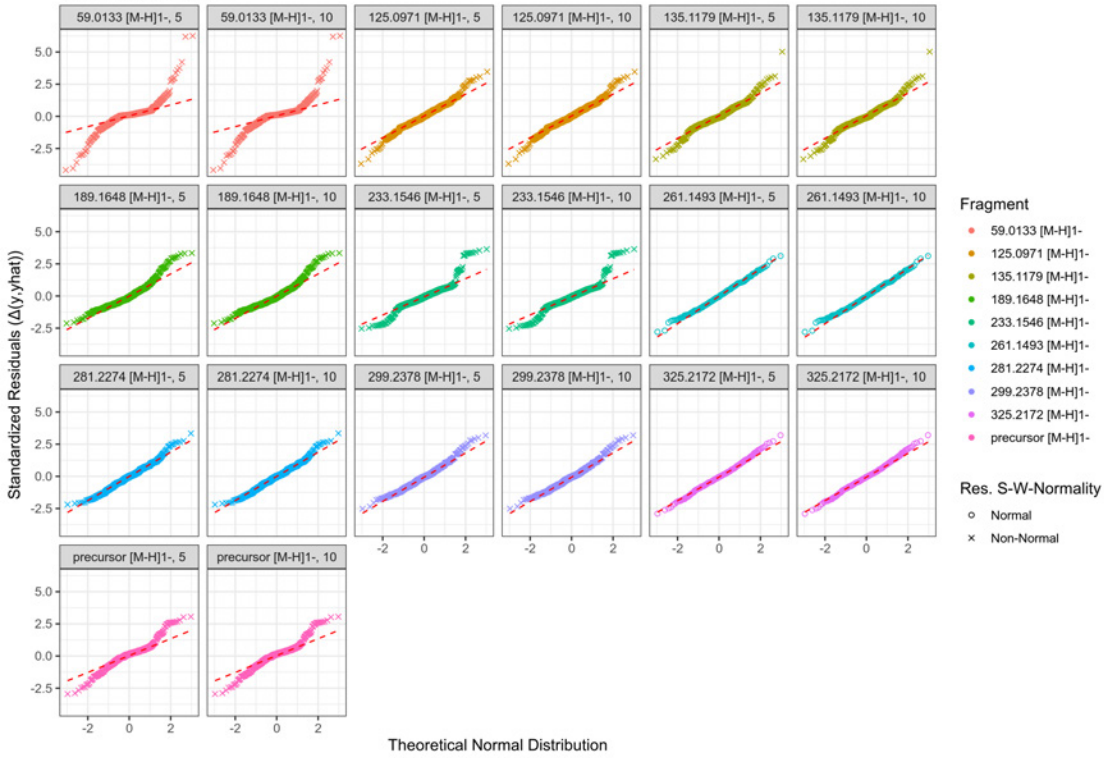

Figure 93. Quantile-quantile plot of residuals

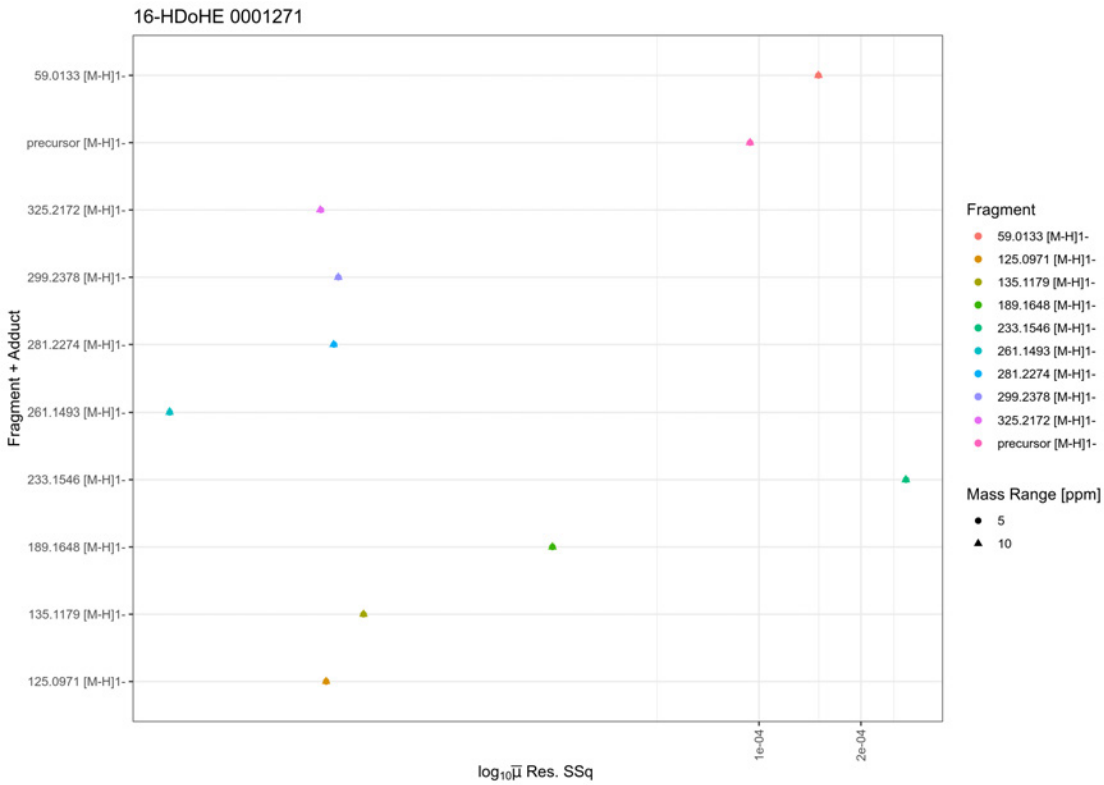

Figure 94. Normalized sum-of-squares of the residuals



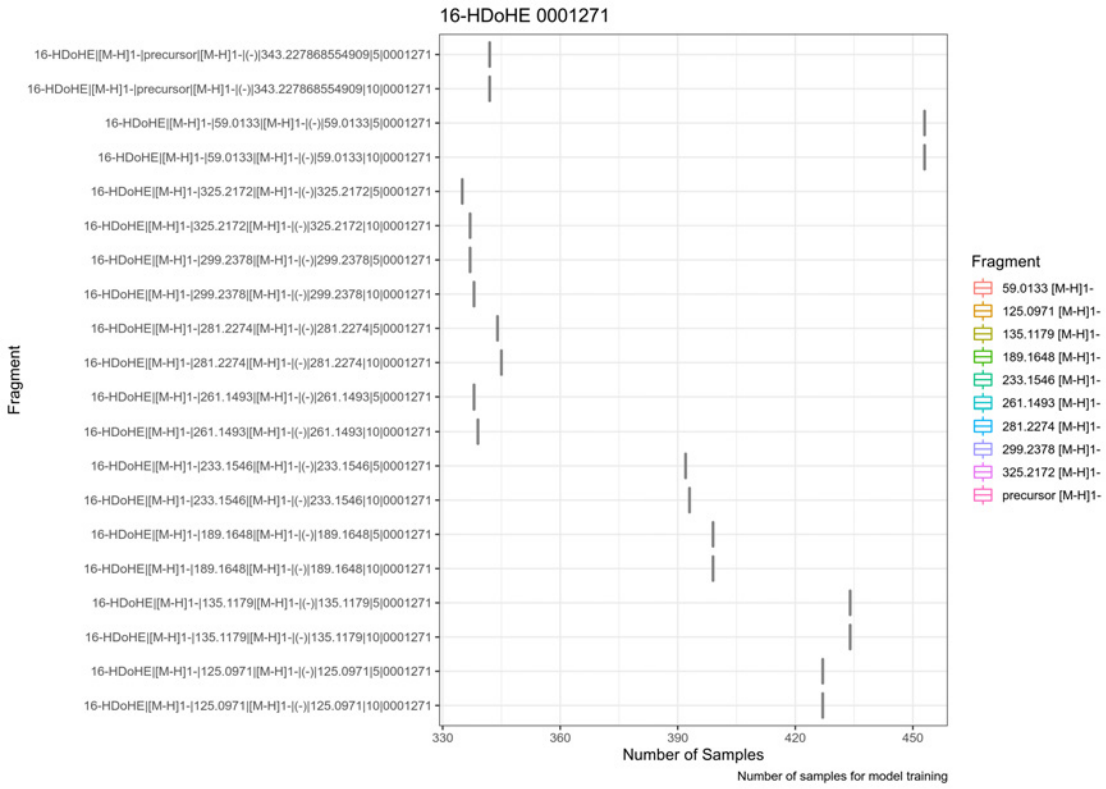

Figure 95. Number of samples used for training per combination Id

# 1.20. 18-HEPE [M-H]1- 0000131

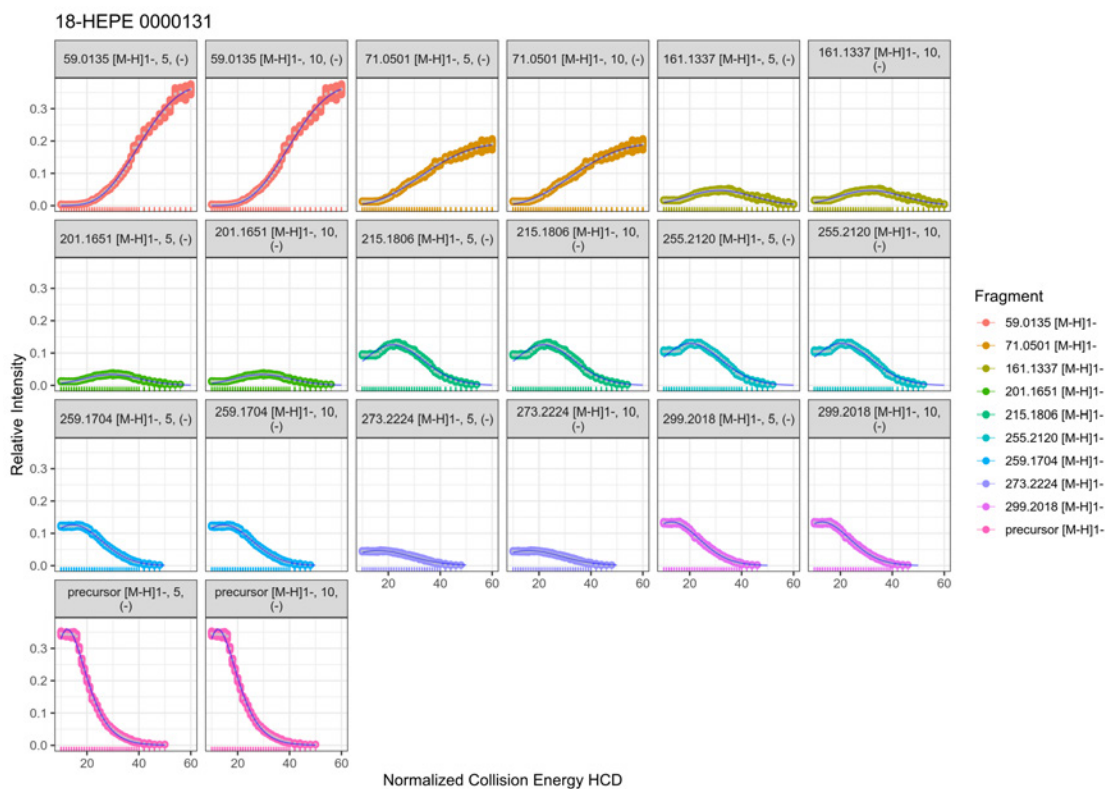

Figure 96. Nonlinear fit

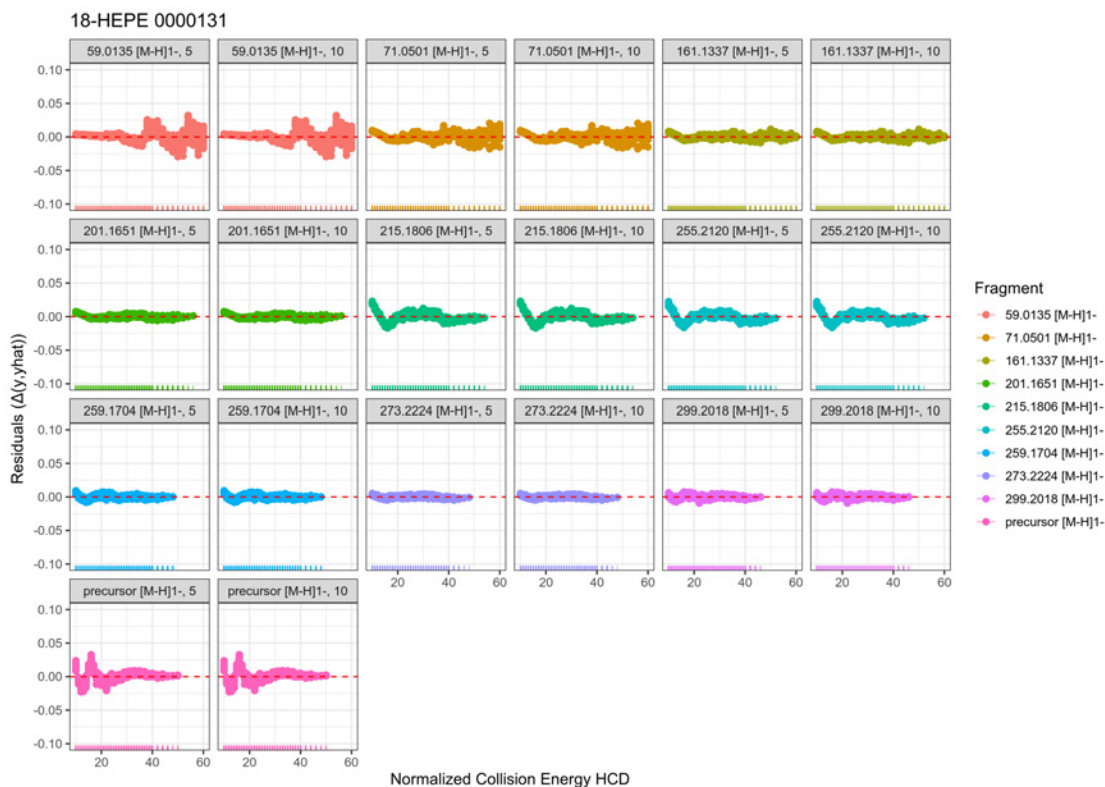

Figure 97. Residuals of nonlinear fit

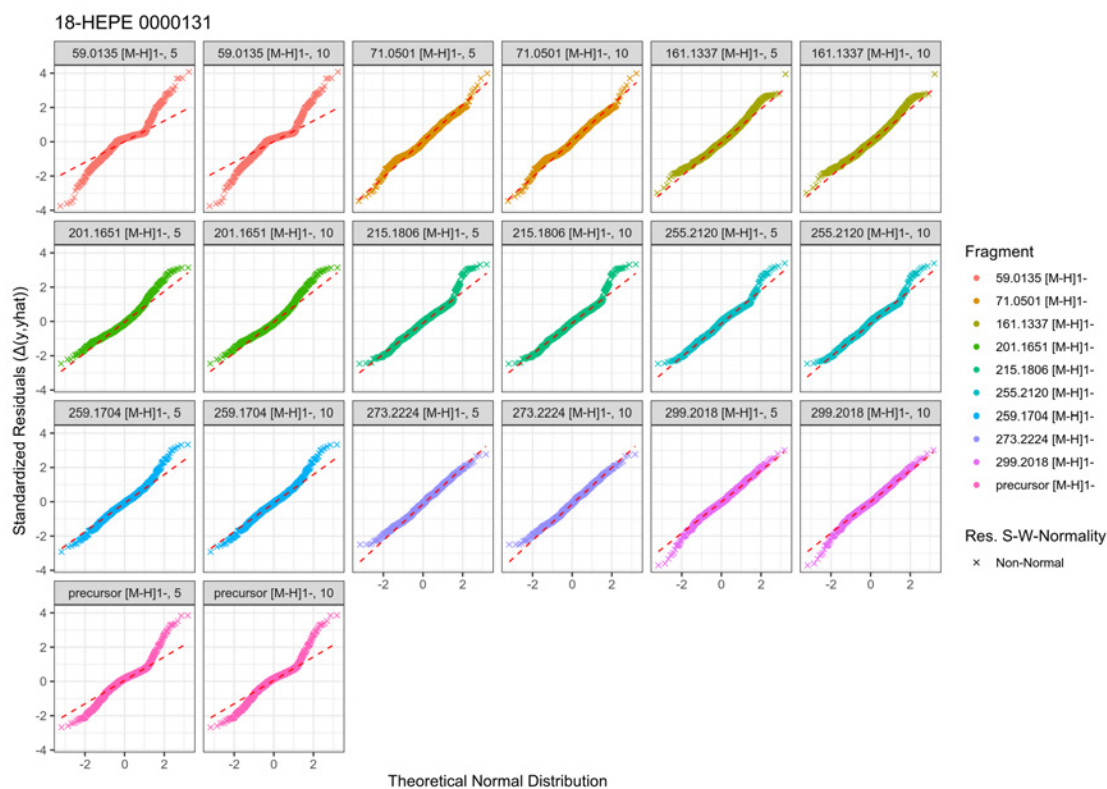

Figure 98. Quantile-quantile plot of residuals

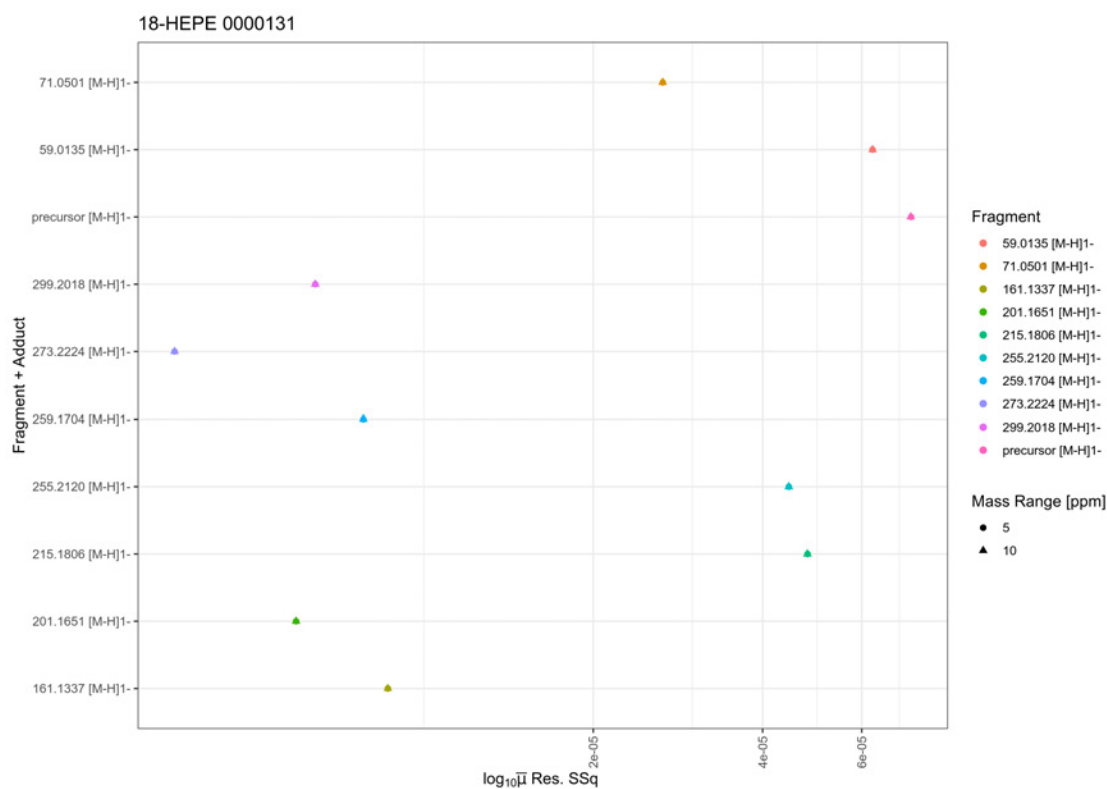

Figure 99. Normalized sum-of-squares of the residuals

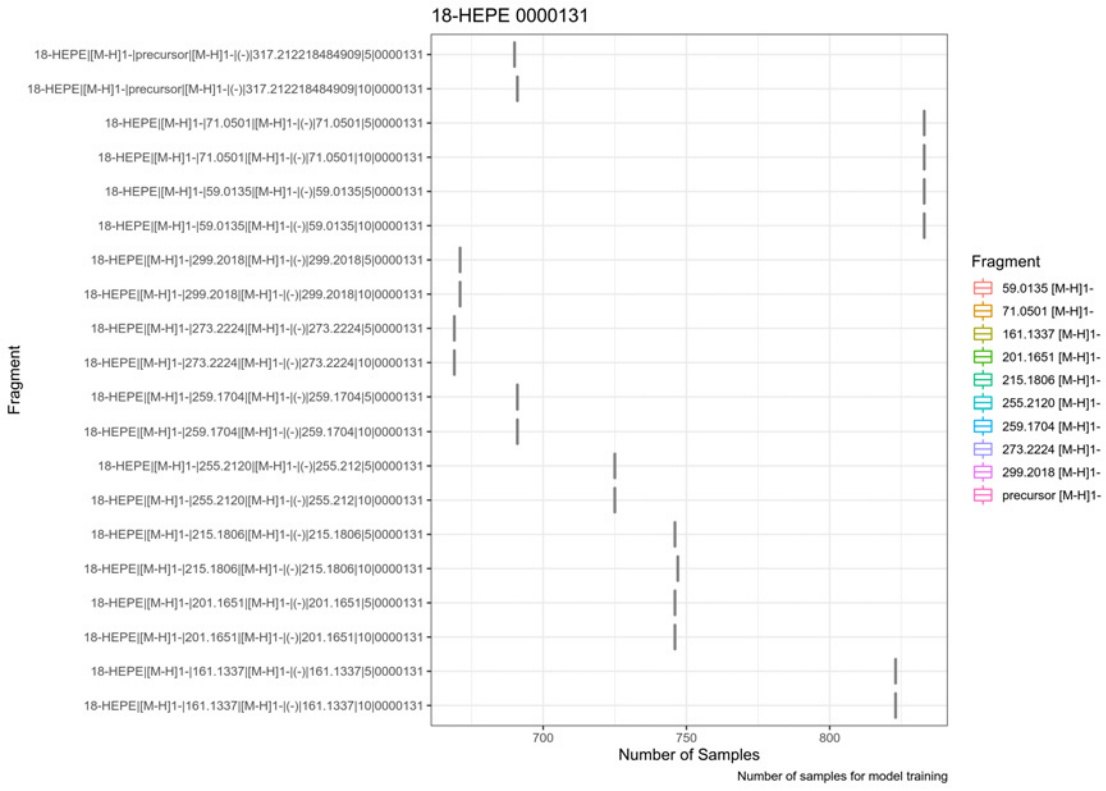

Figure 100. Number of samples used for training per combination Id

# 1.21. 5(6)-EET{d11} [M-H]1- 0000161

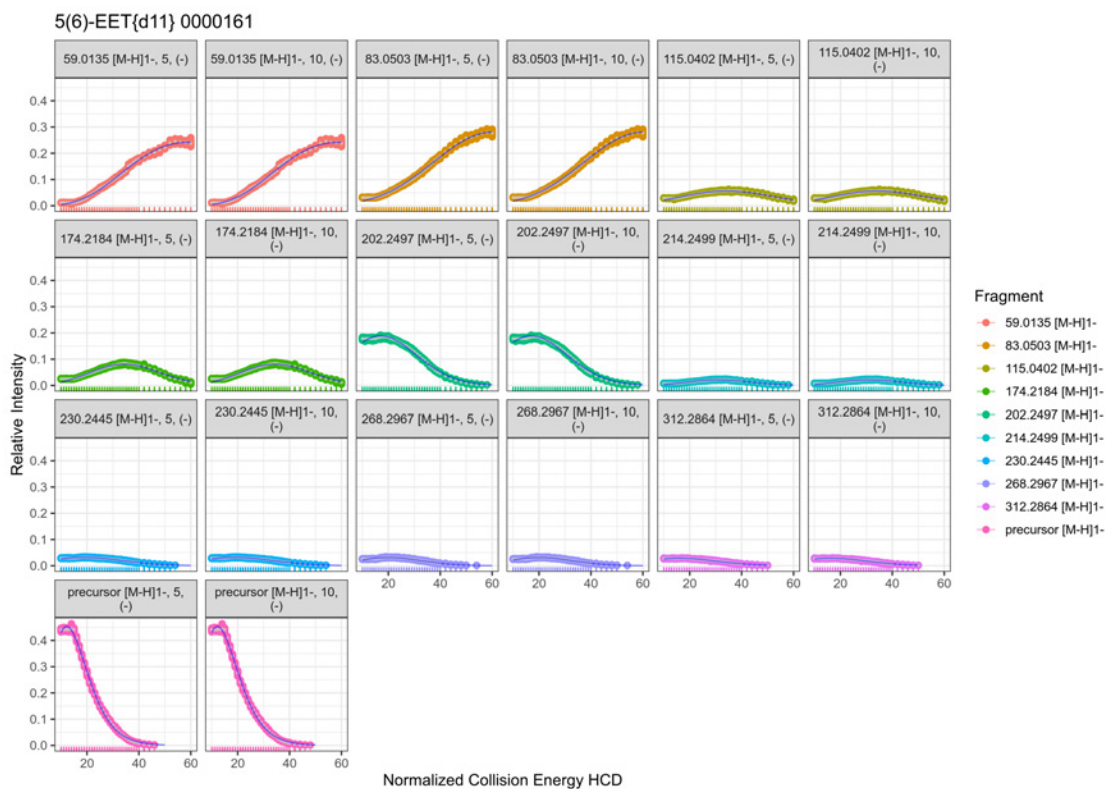

Figure 101. Nonlinear fit

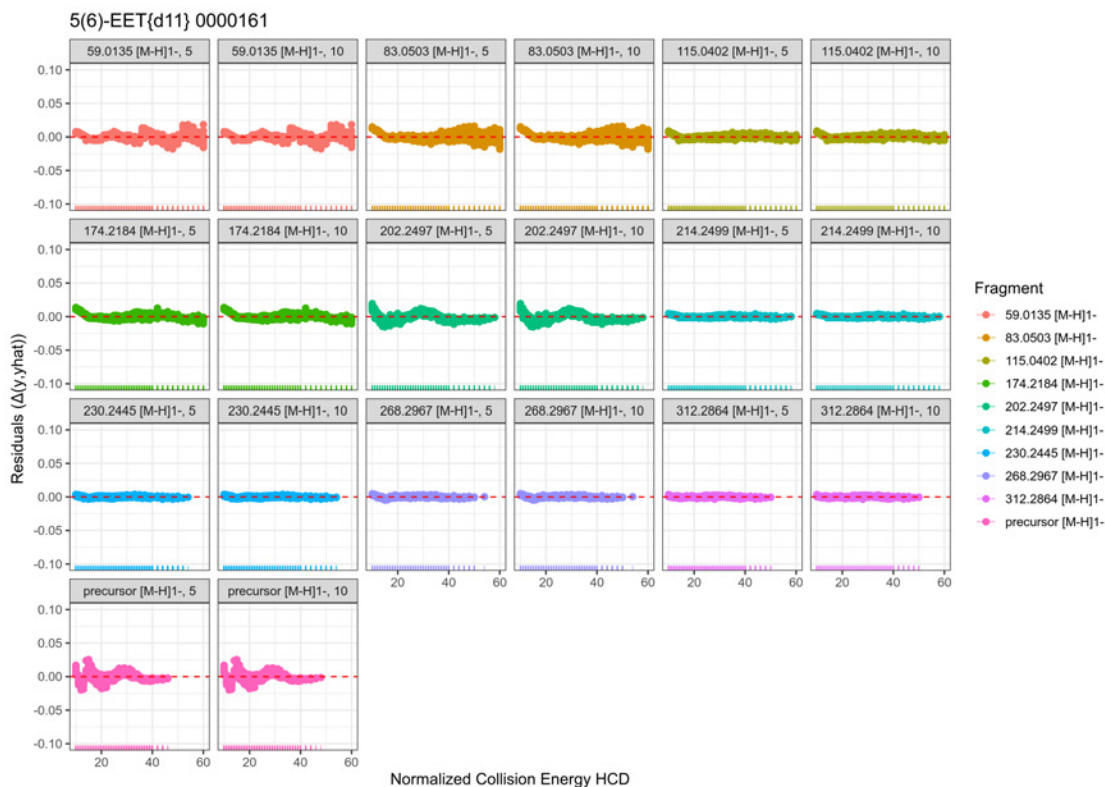

Figure 102. Residuals of nonlinear fit

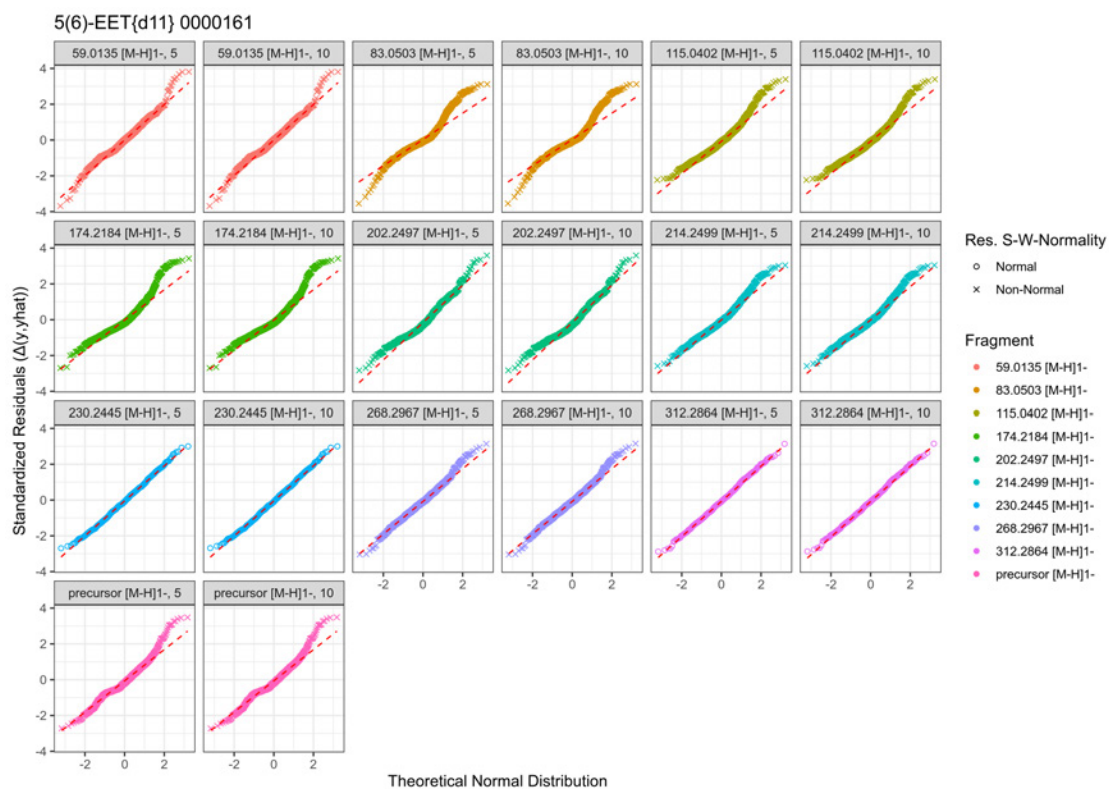

Figure 103. Quantile-quantile plot of residuals

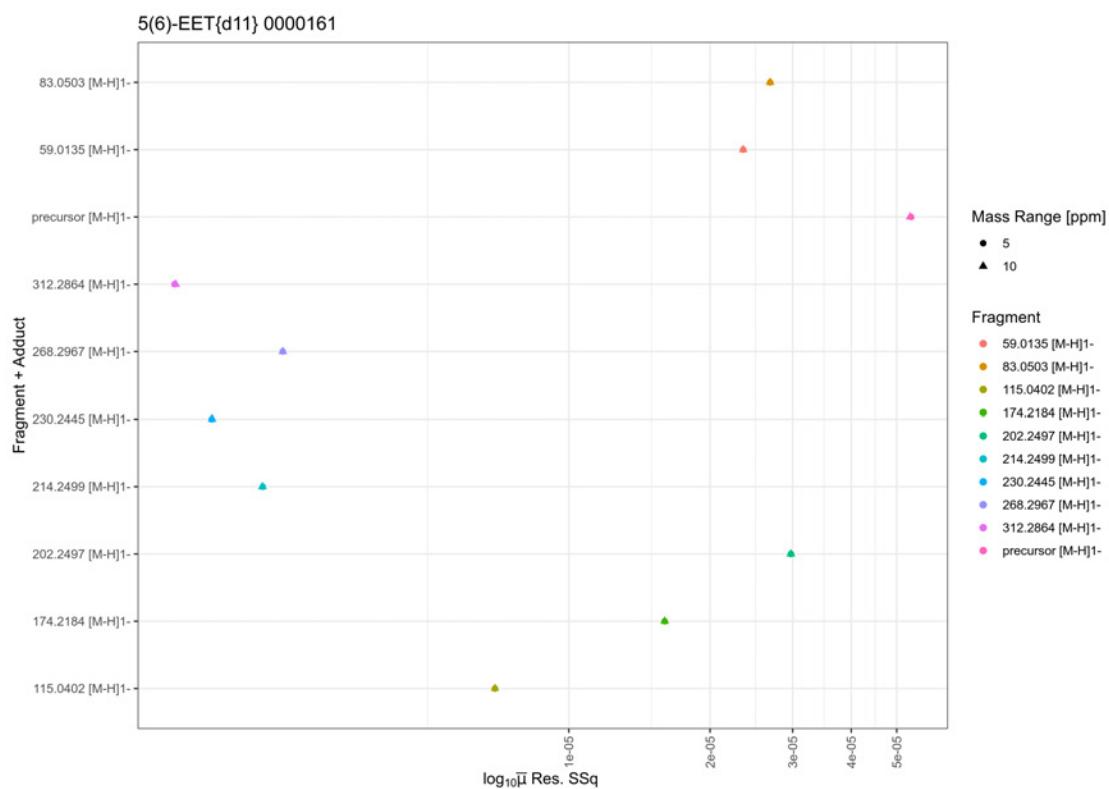

Figure 104. Normalized sum-of-squares of the residuals



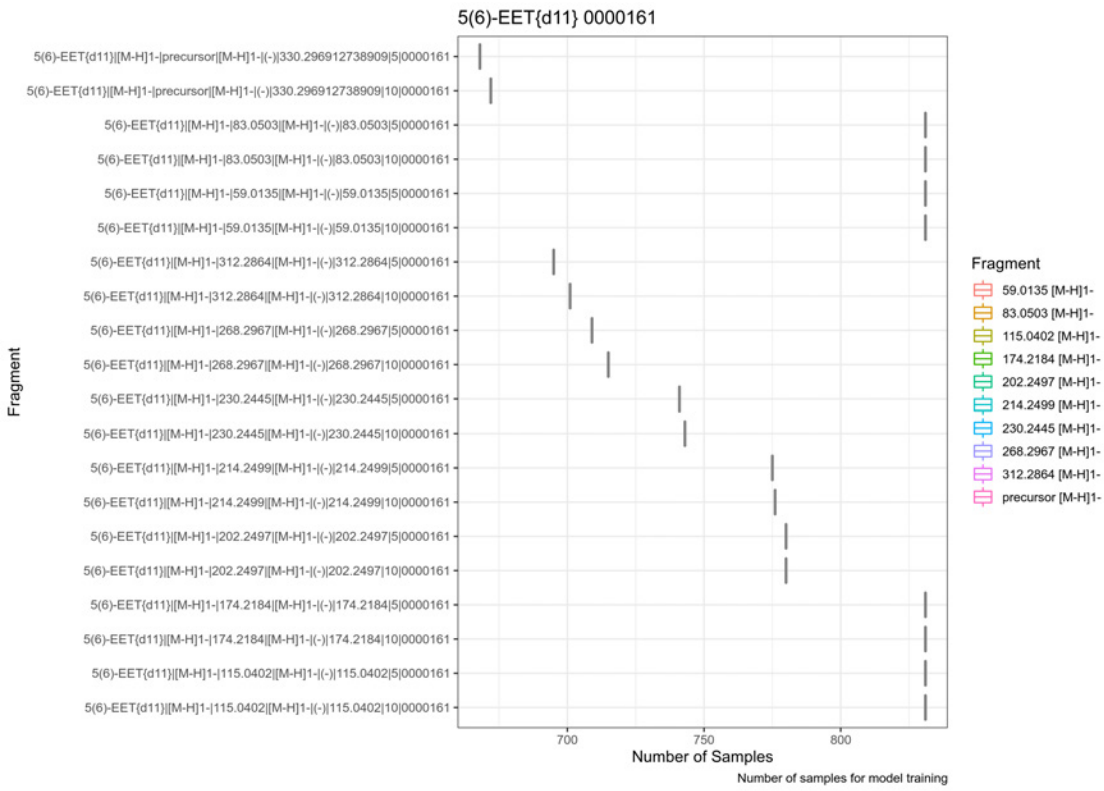

Figure 105. Number of samples used for training per combination Id

# 1.22. 5,12-DiHETE [M-H]1- 0001299

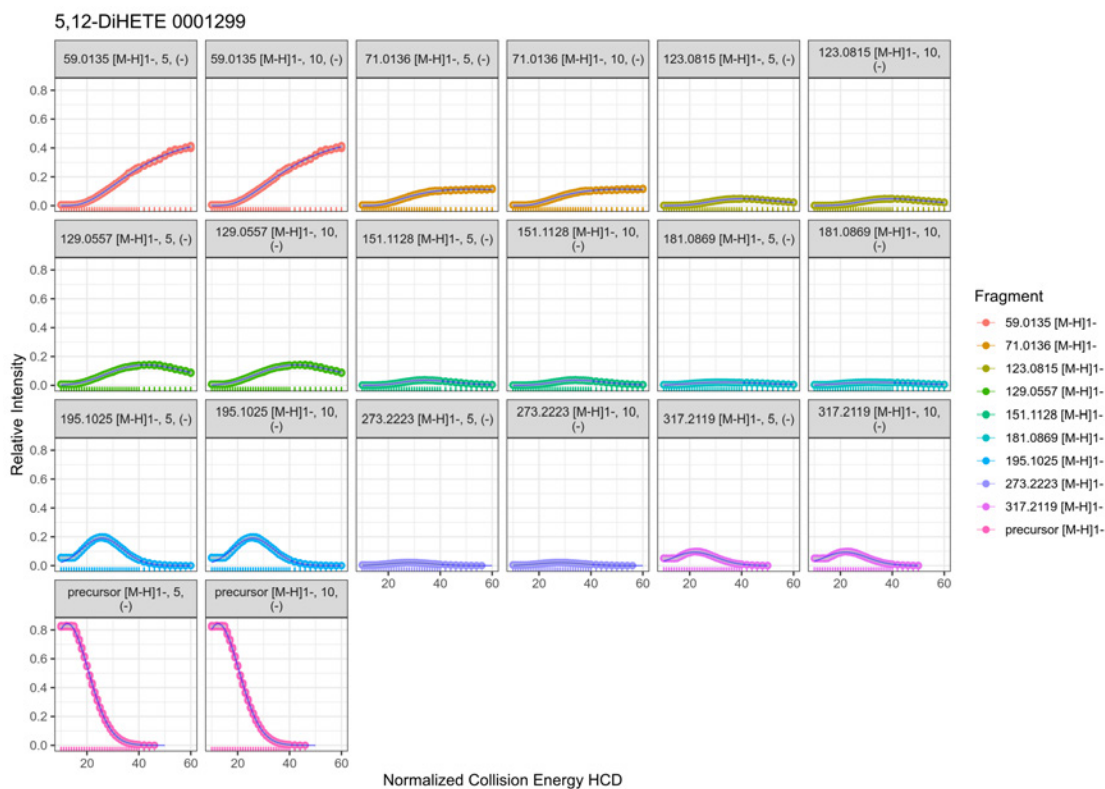

Figure 106. Nonlinear fit

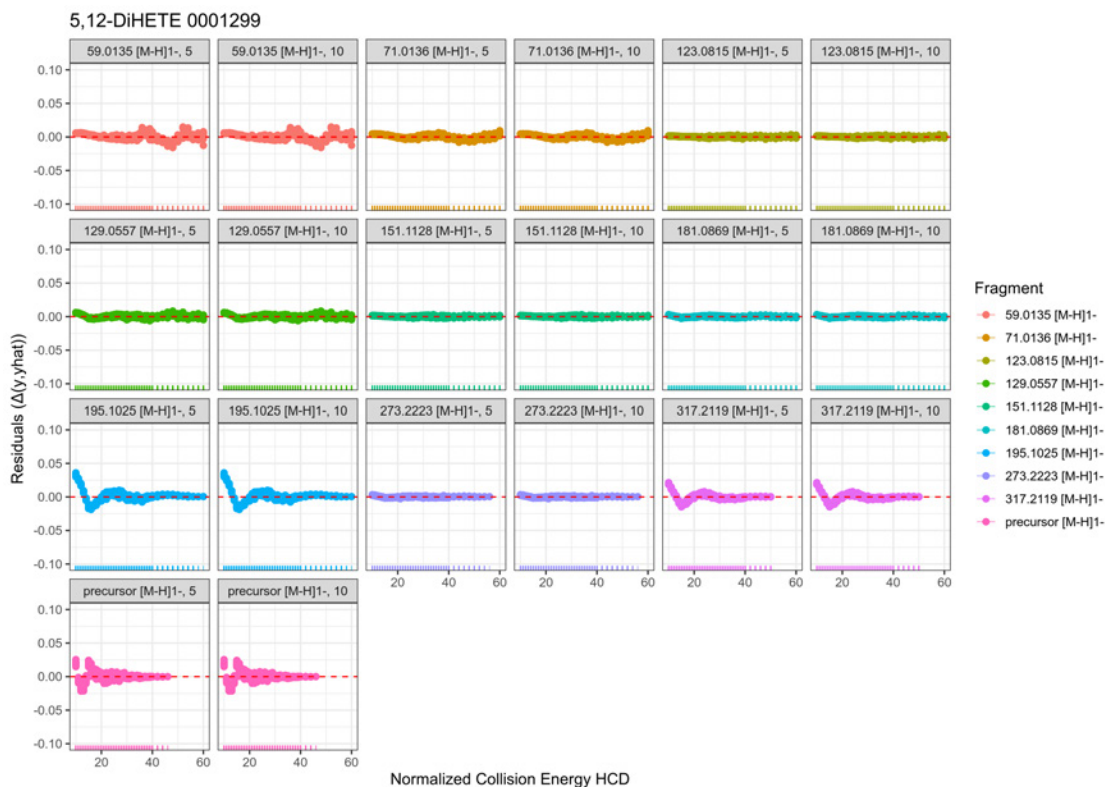

Figure 107. Residuals of nonlinear fit

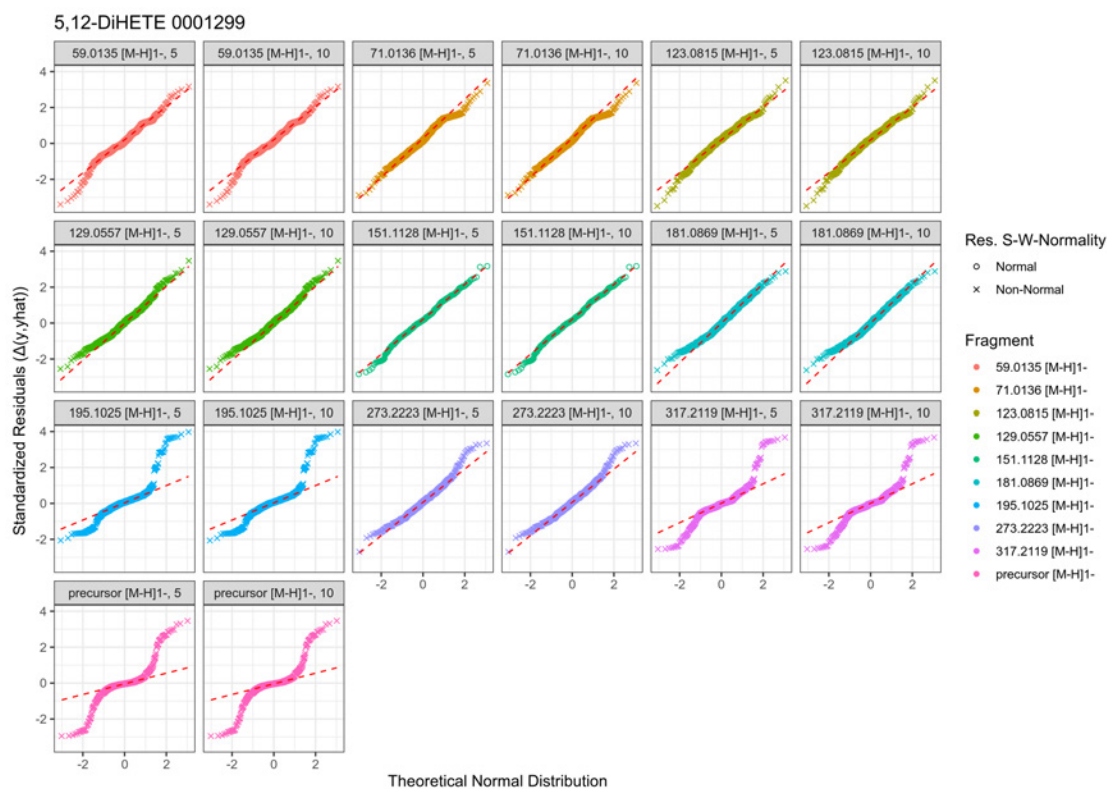

Figure 108. Quantile-quantile plot of residuals

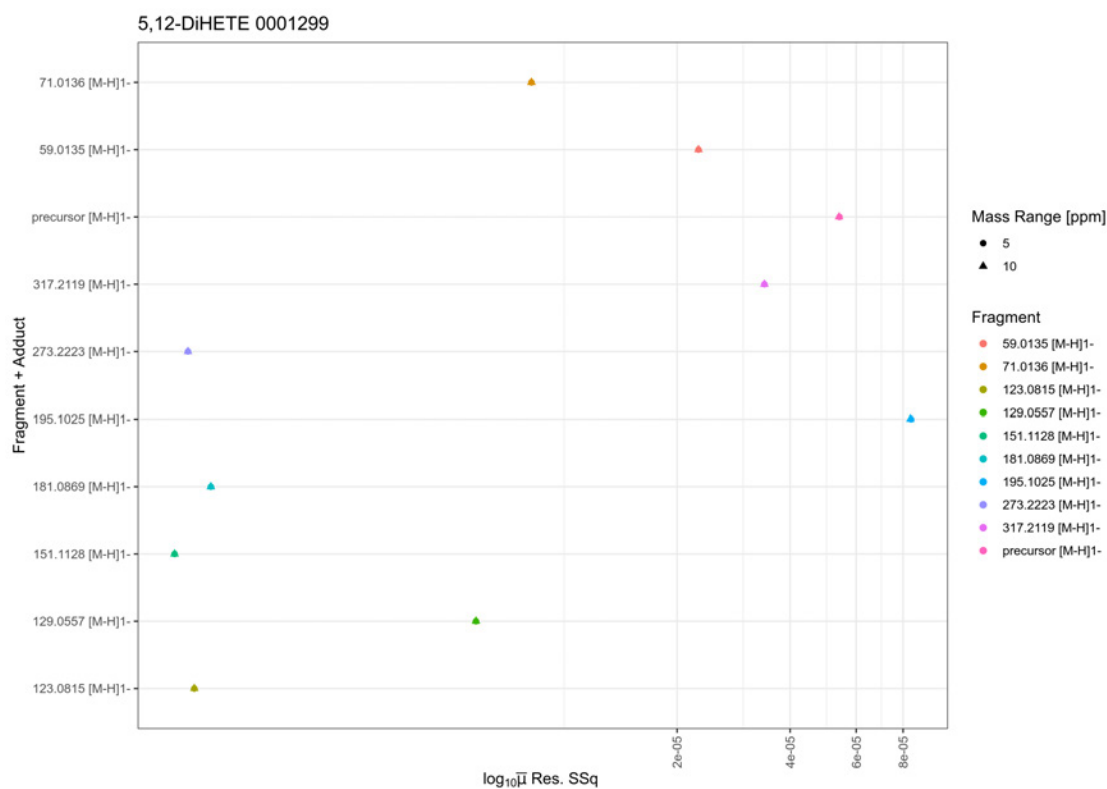

Figure 109. Normalized sum-of-squares of the residuals

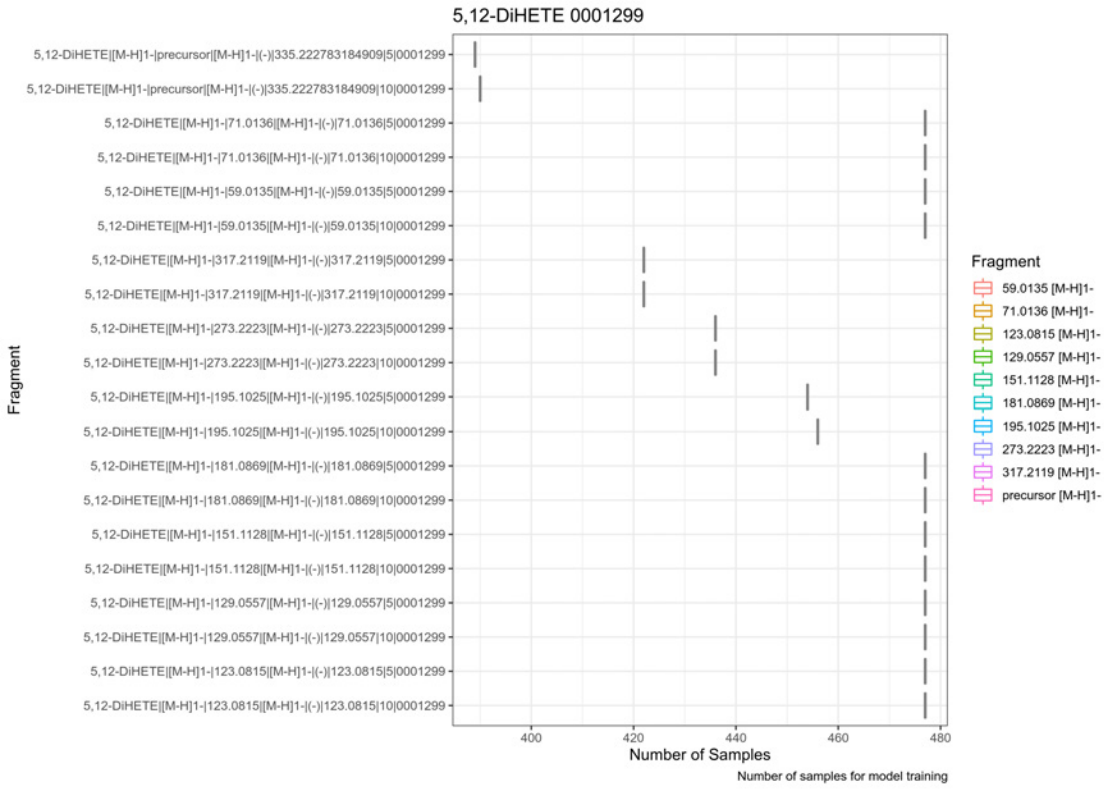

Figure 110. Number of samples used for training per combination Id

# 1.23. 5,6-DiHETE [M-H]1- 0001301

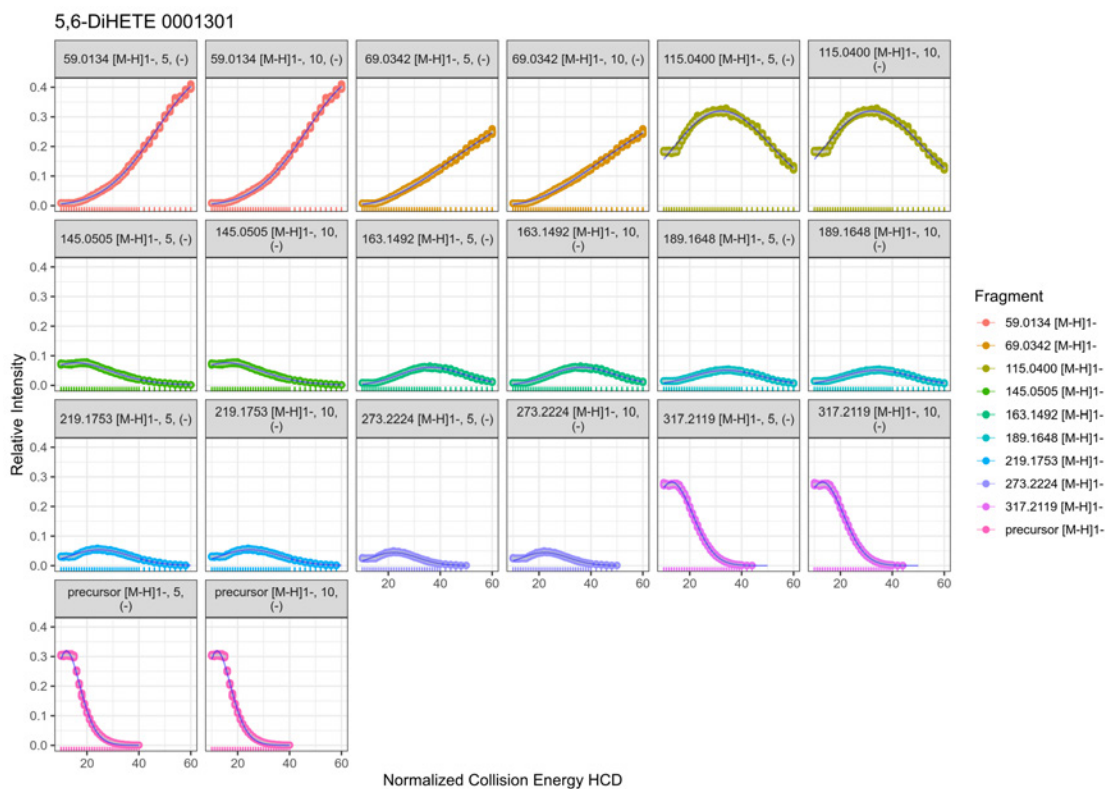

Figure 111. Nonlinear fit

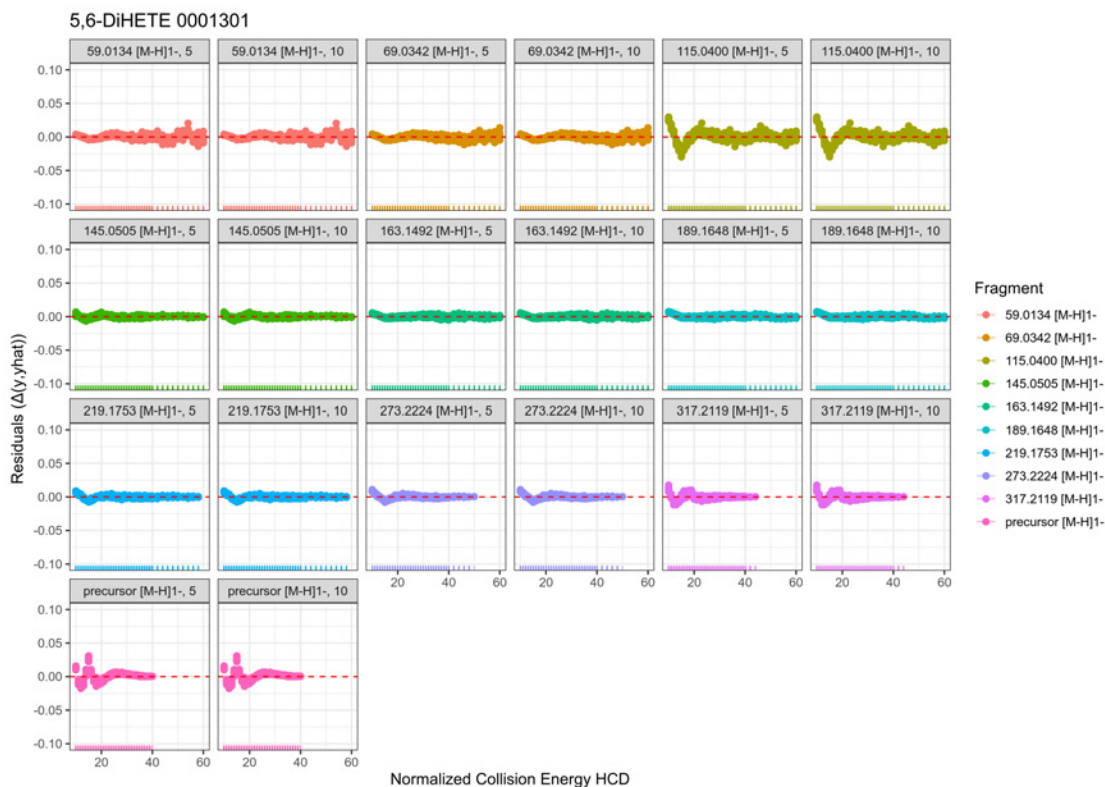

Figure 112. Residuals of nonlinear fit

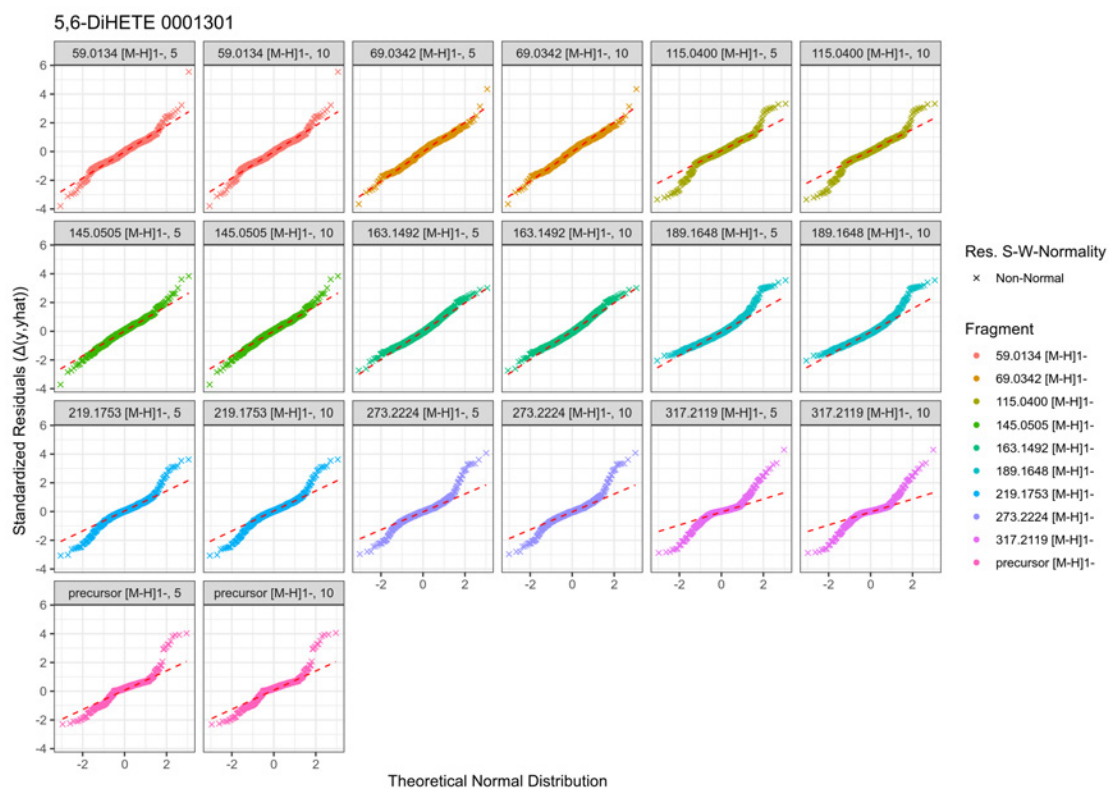

Figure 113. Quantile-quantile plot of residuals

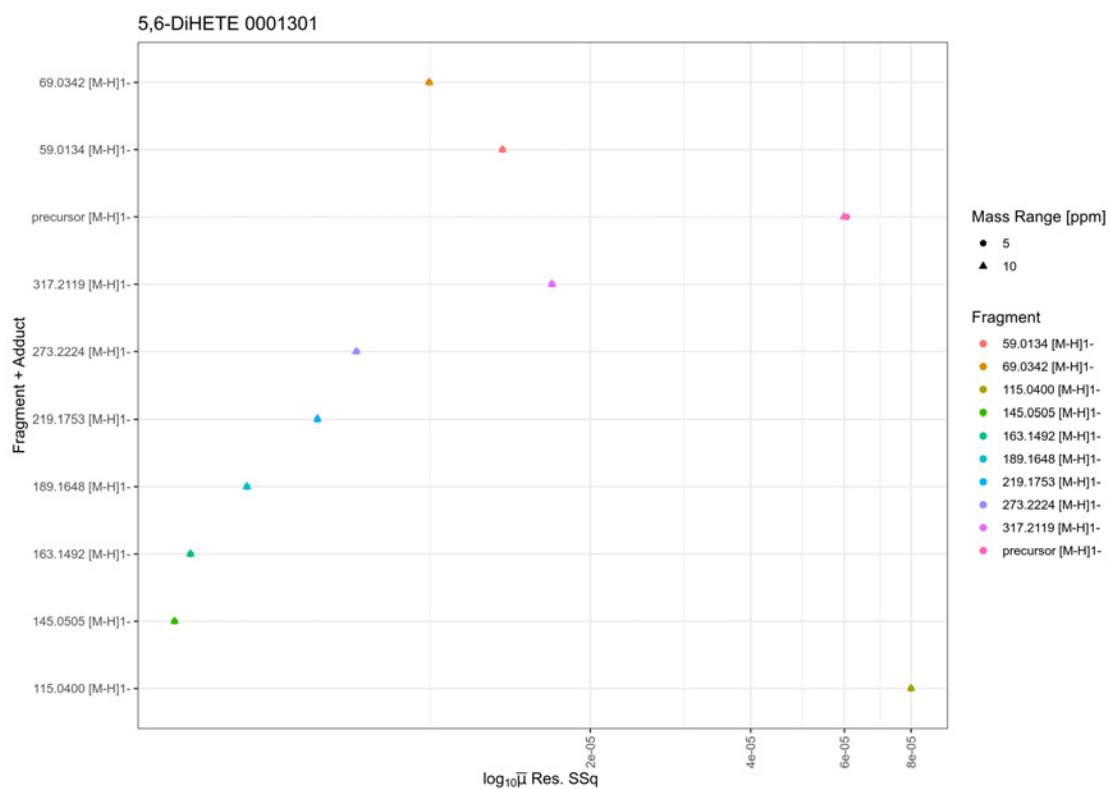

Figure 114. Normalized sum-of-squares of the residuals



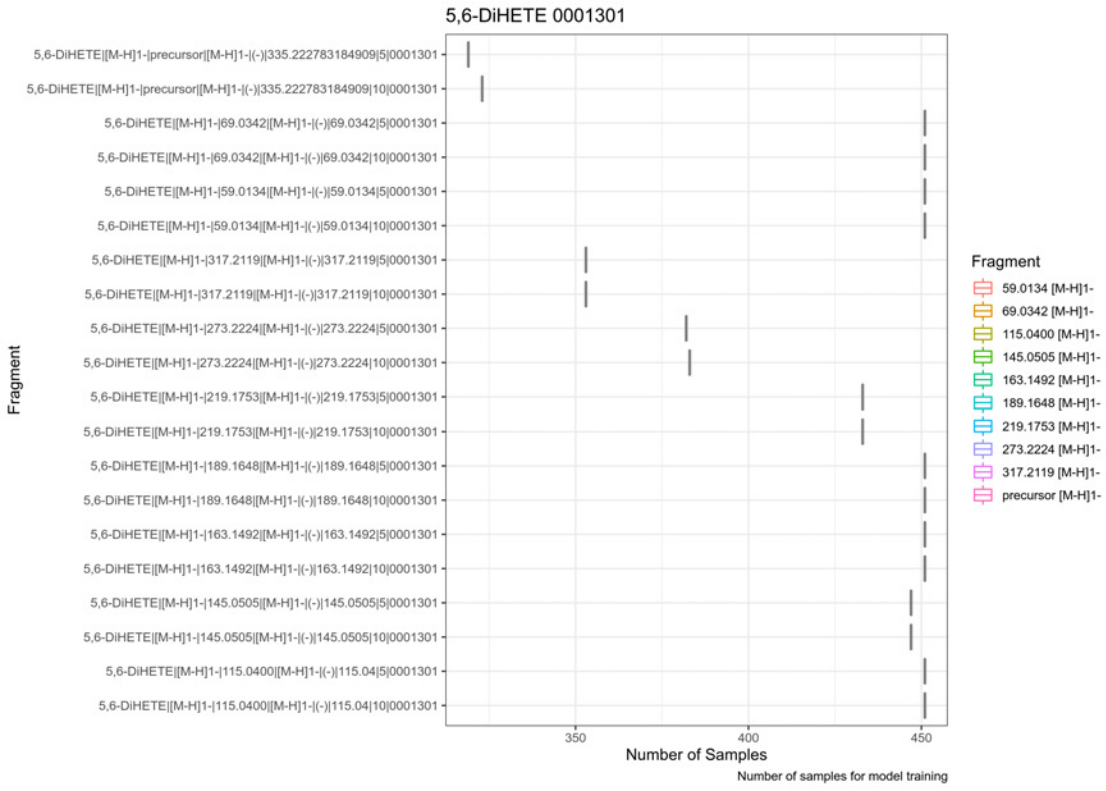

Figure 115. Number of samples used for training per combination Id

# 1.24. 5-HEPE [M-H]1- 0000133

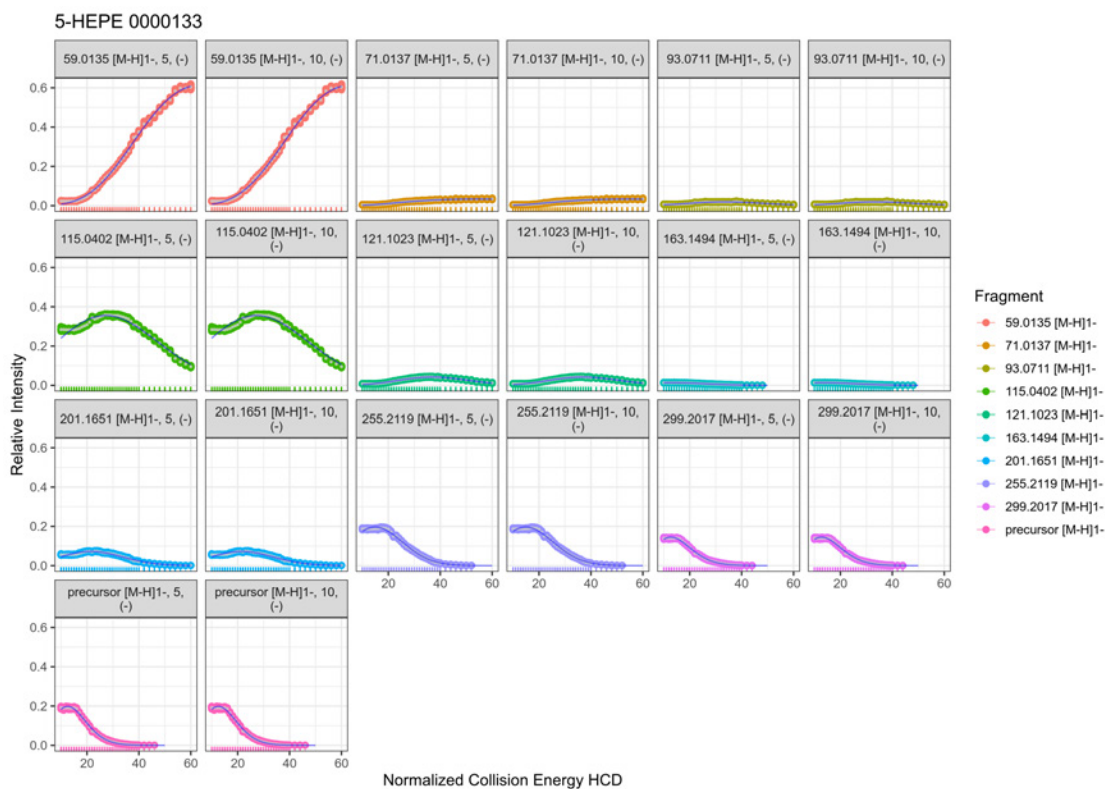

Figure 116. Nonlinear fit

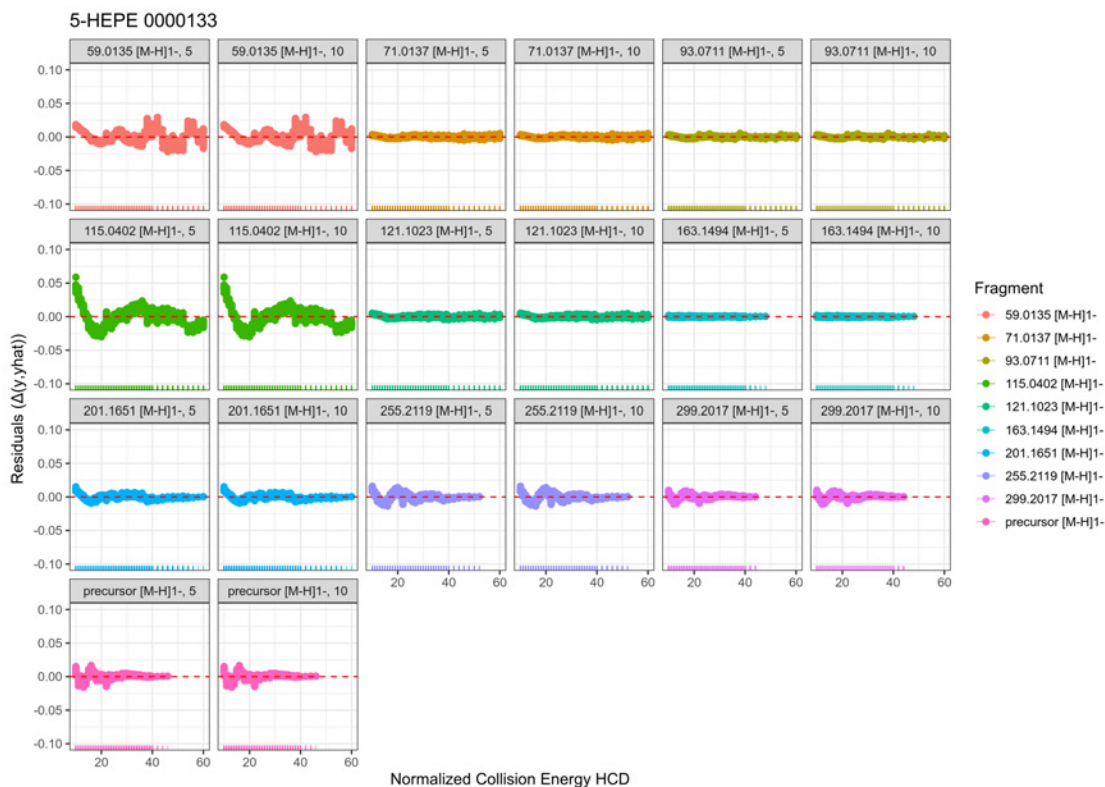

Figure 117. Residuals of nonlinear fit

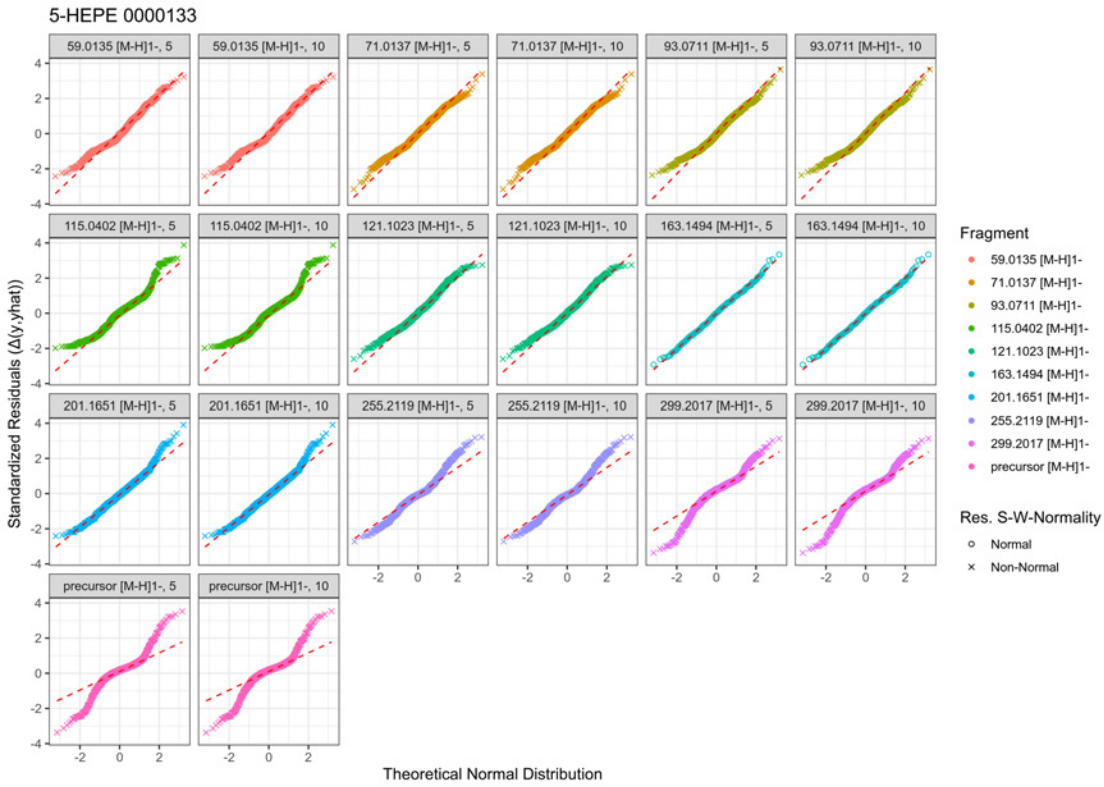

Figure 118. Quantile-quantile plot of residuals

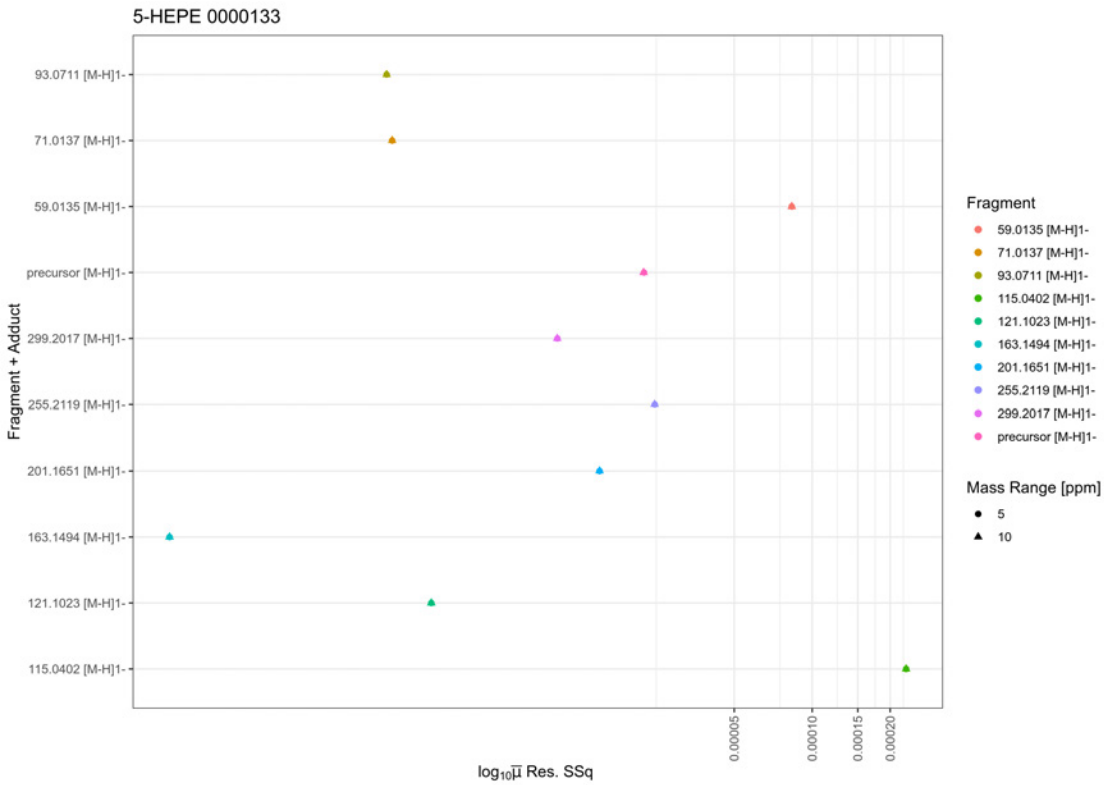

Figure 119. Normalized sum-of-squares of the residuals

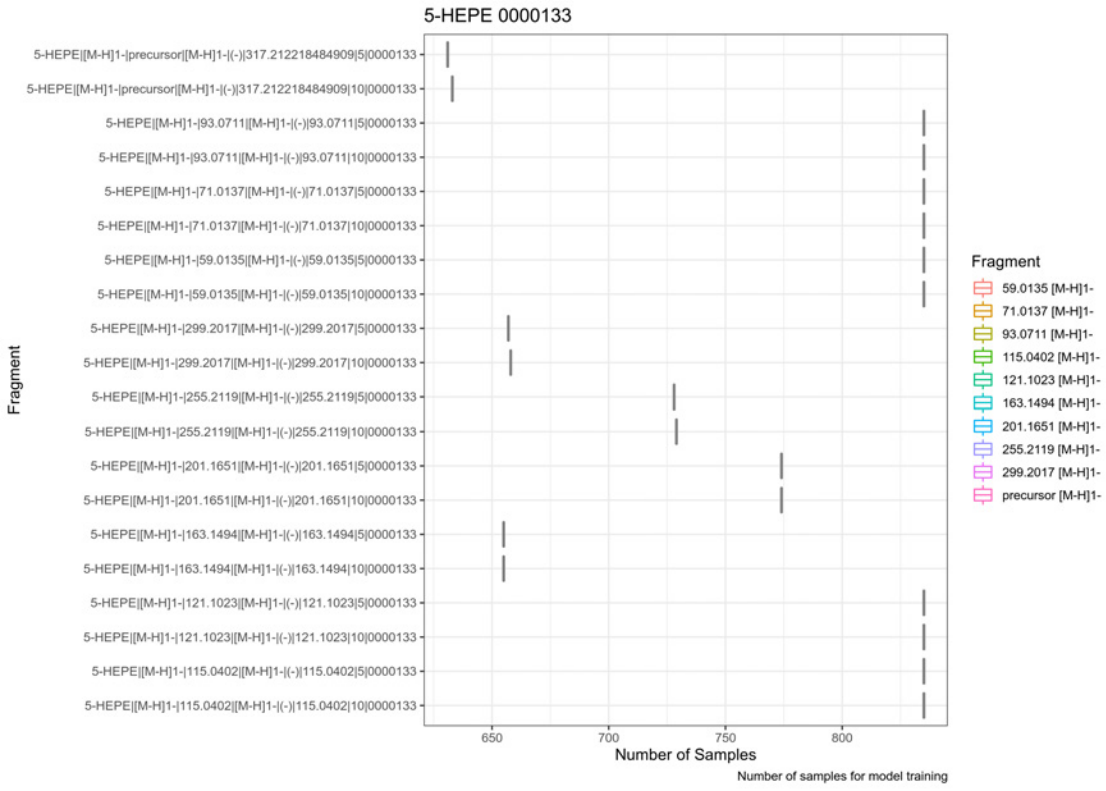

Figure 120. Number of samples used for training per combination Id

# 1.25. 5-HETE{d8} [M-H]1- 0000145

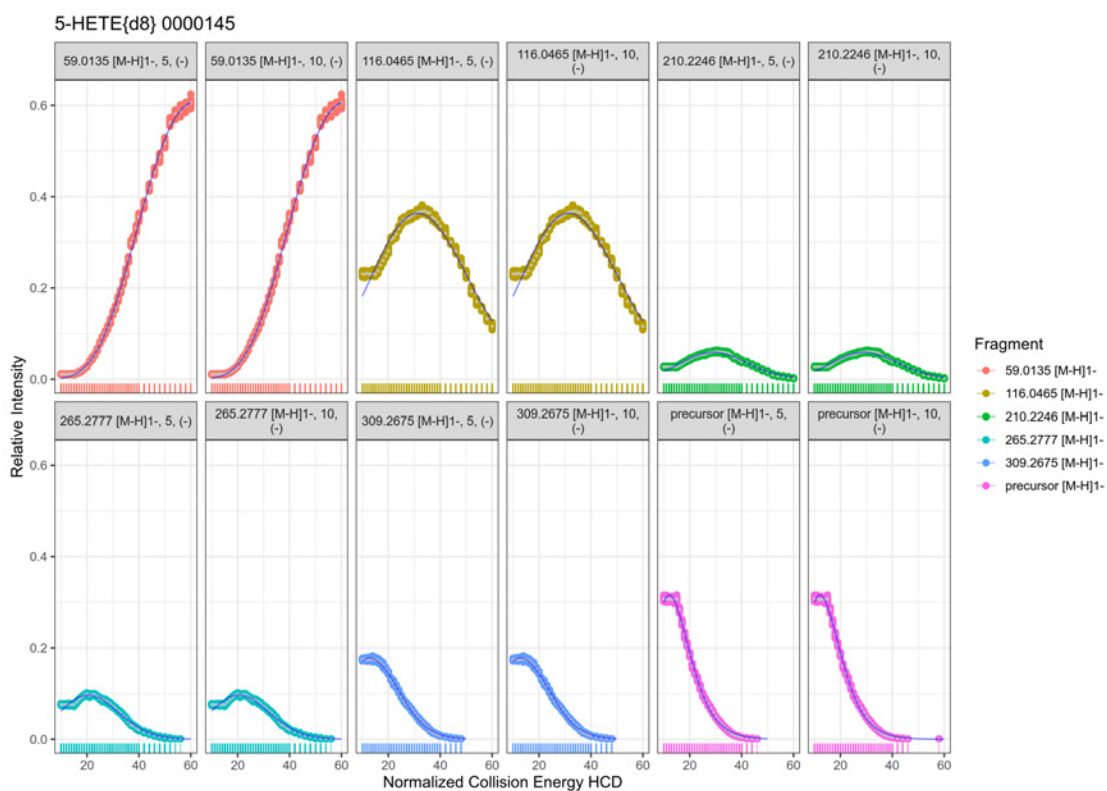

Figure 121. Nonlinear fit

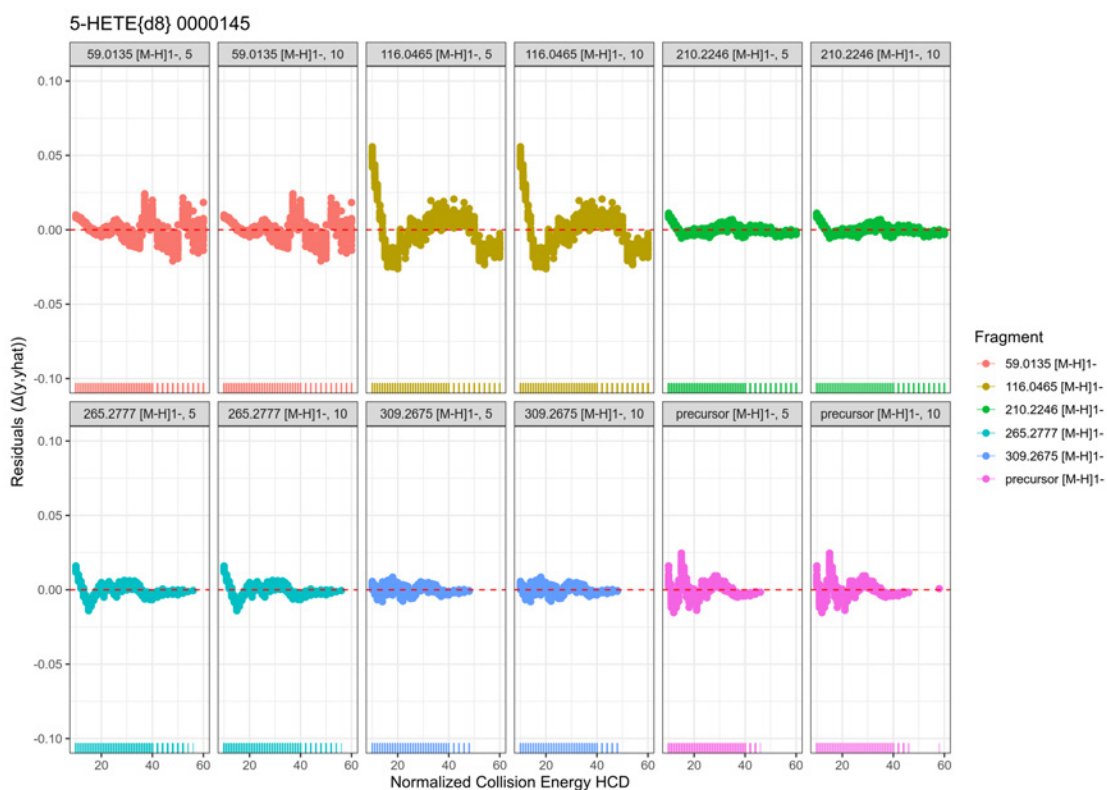

Figure 122. Residuals of nonlinear fit

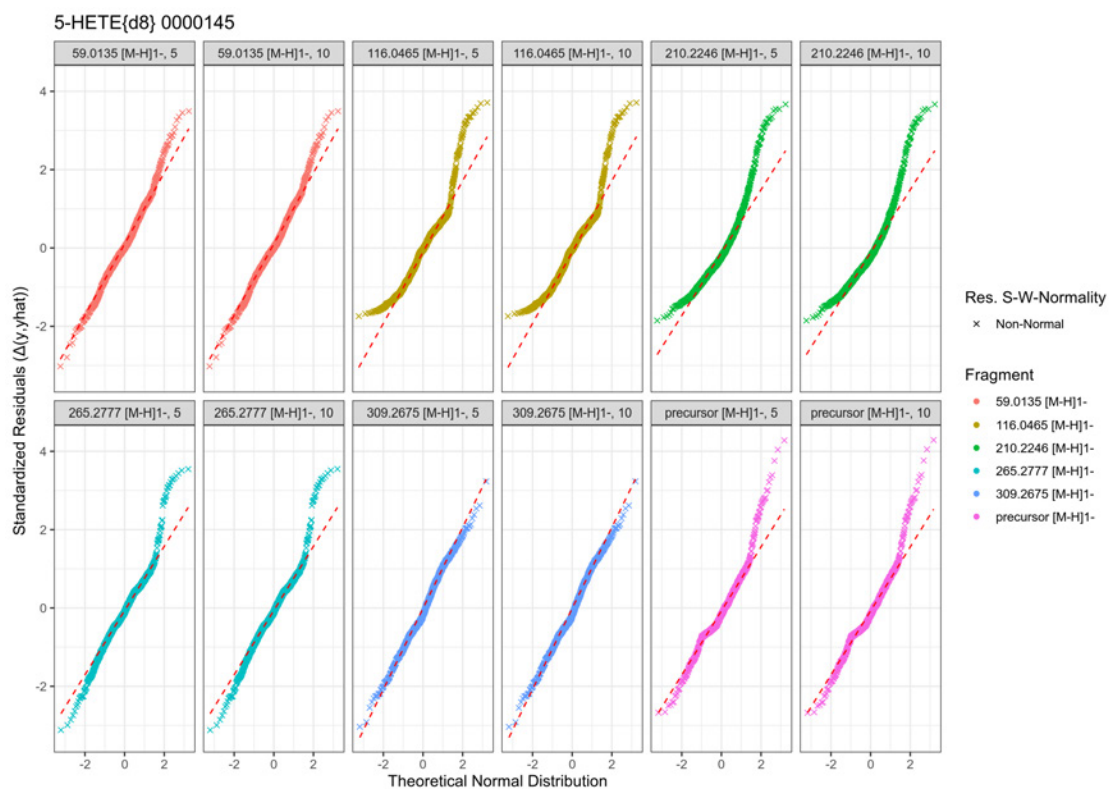

Figure 123. Quantile-quantile plot of residuals

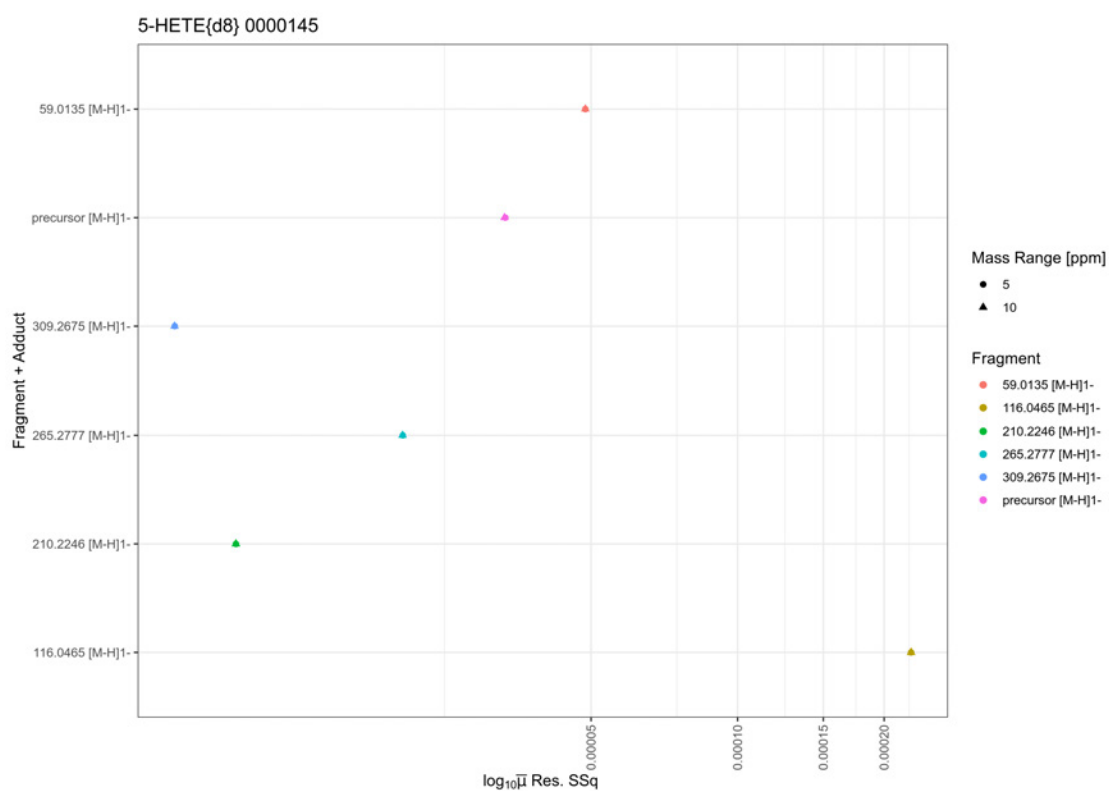

Figure 124. Normalized sum-of-squares of the residuals



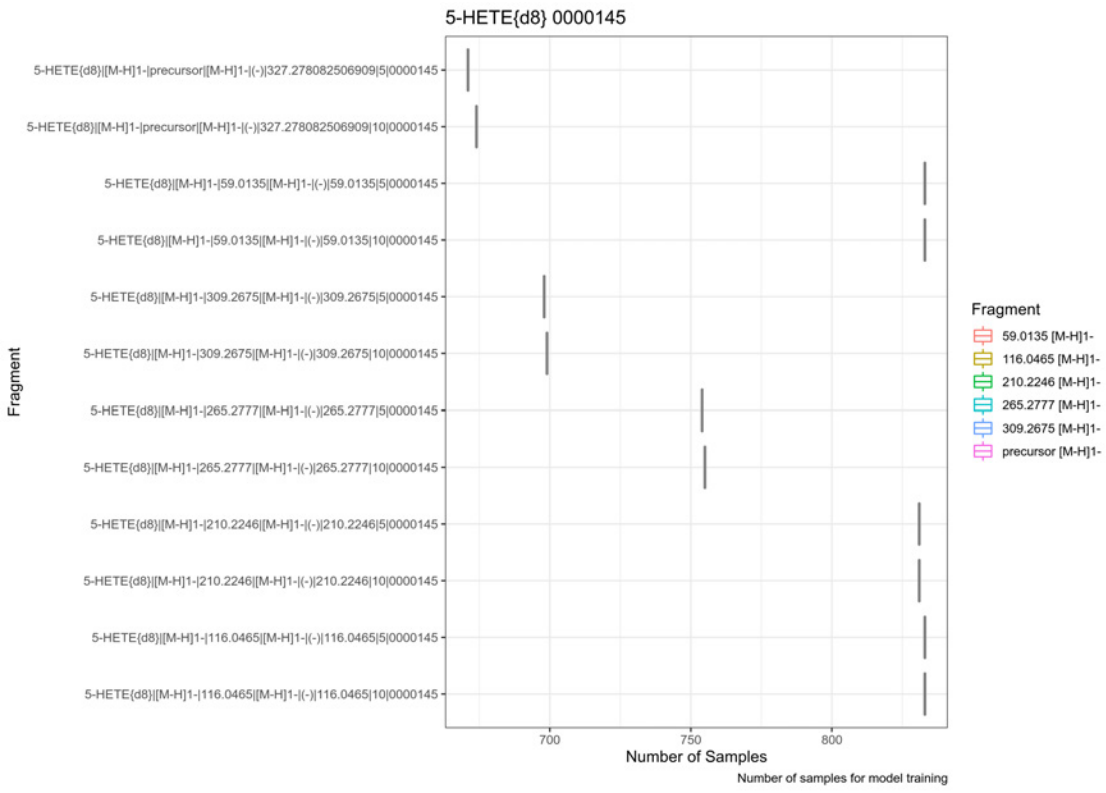

Figure 125. Number of samples used for training per combination Id

# 1.26. 5-HpETE [M-H]1- 0001297

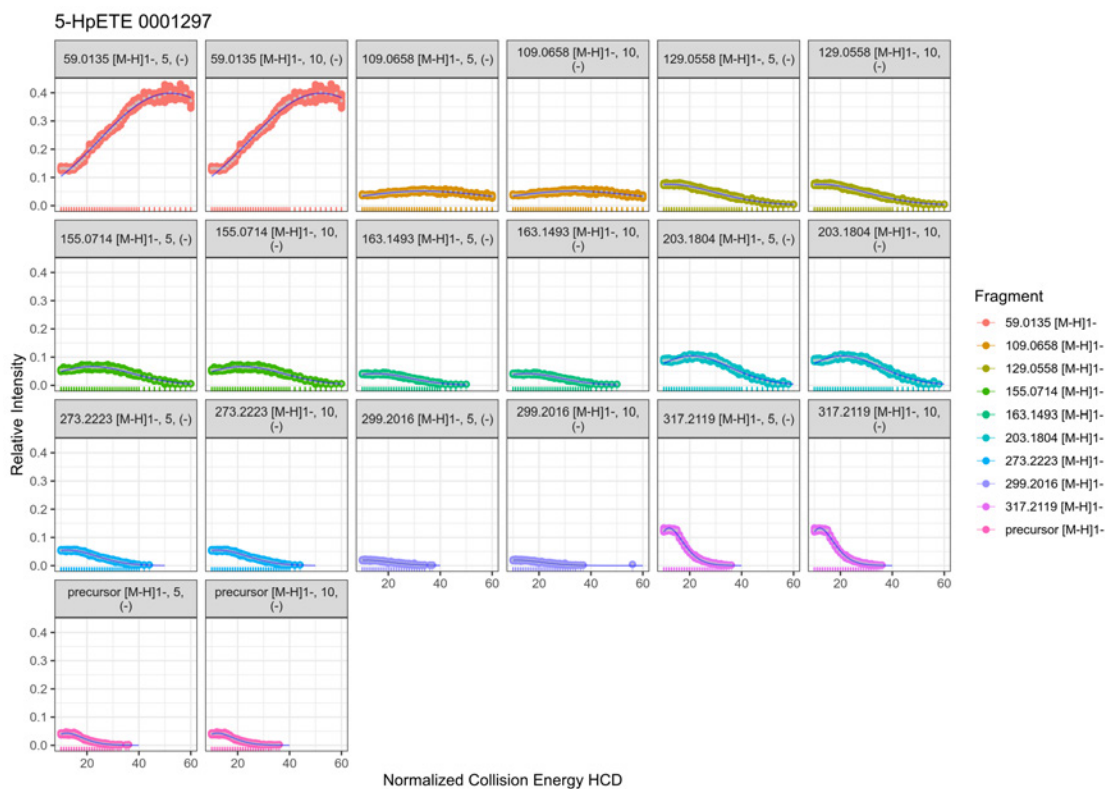

Figure 126. Nonlinear fit

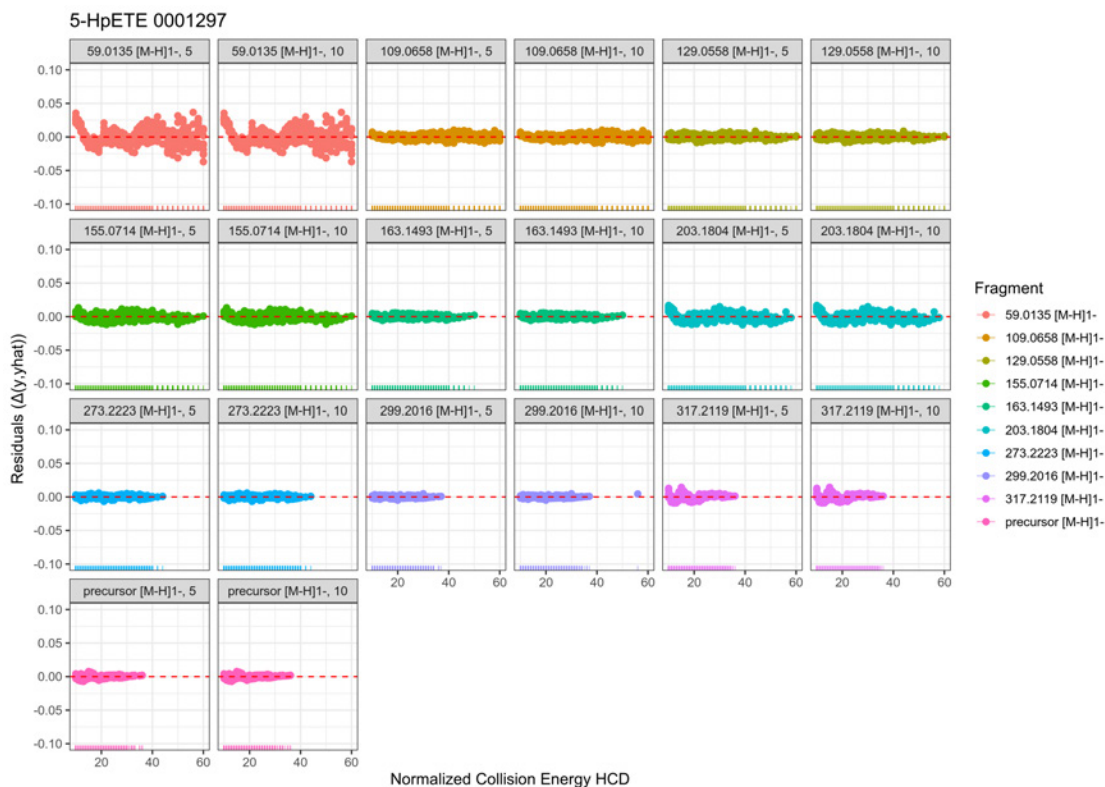

Figure 127. Residuals of nonlinear fit

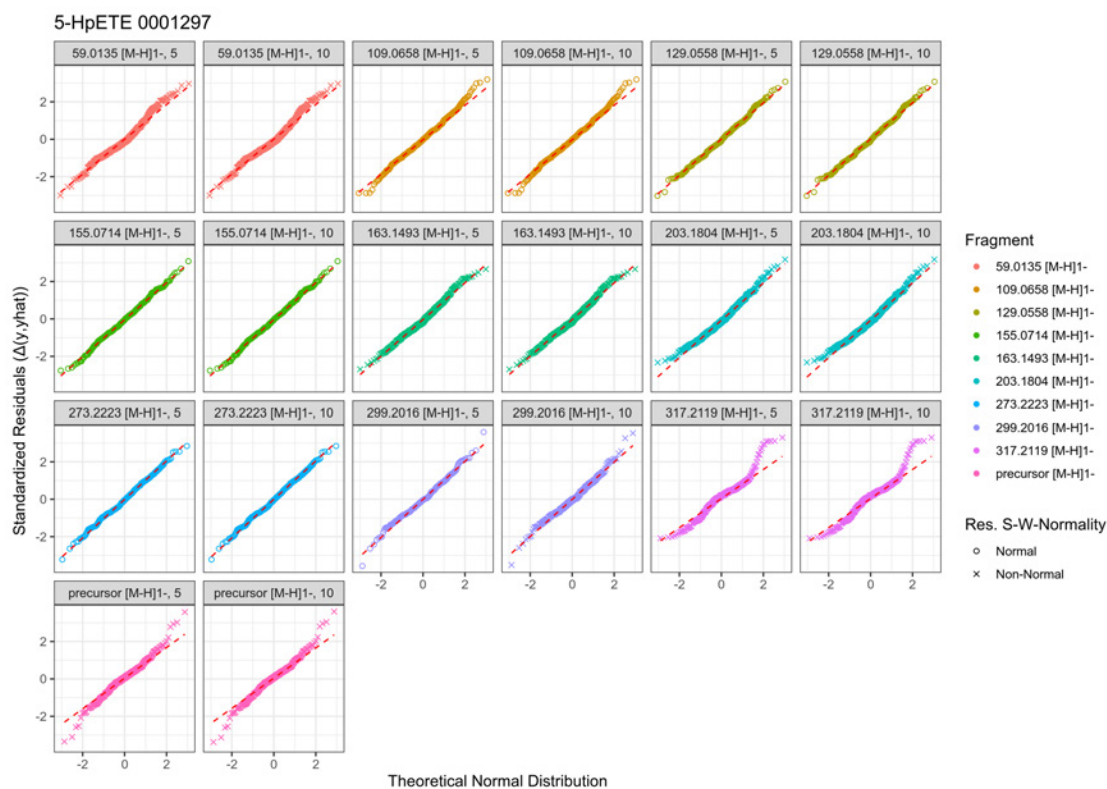

Figure 128. Quantile-quantile plot of residuals

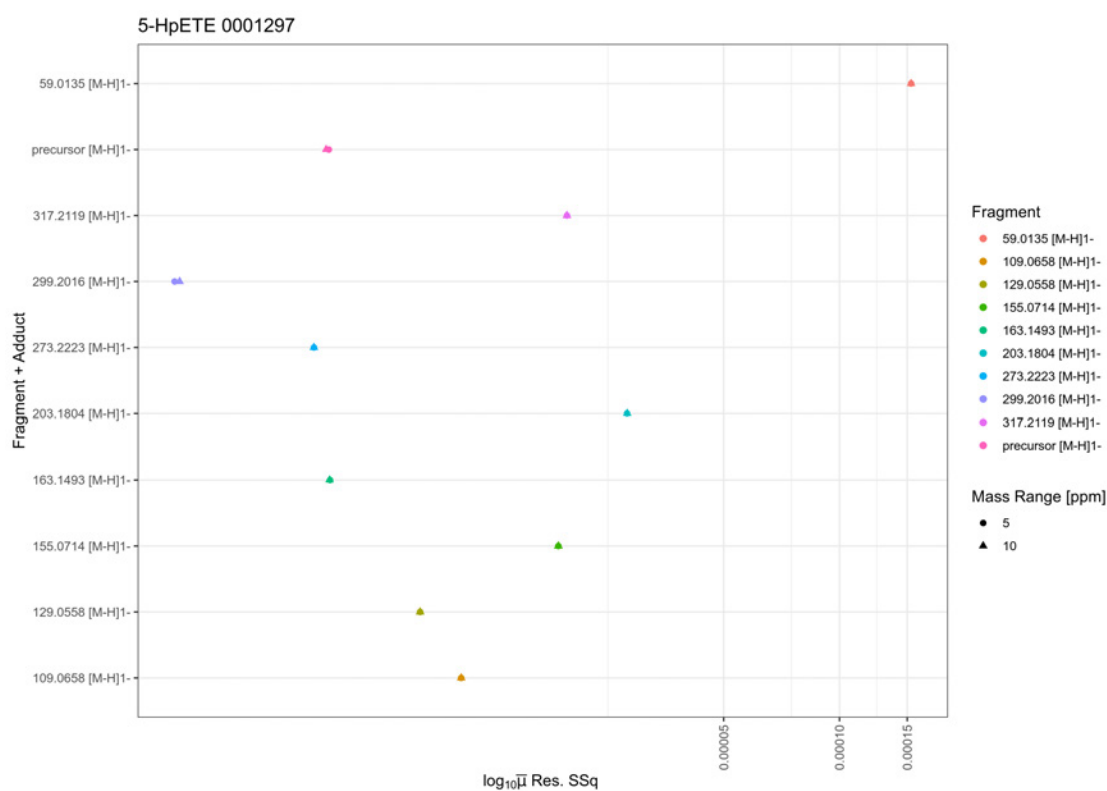

Figure 129. Normalized sum-of-squares of the residuals

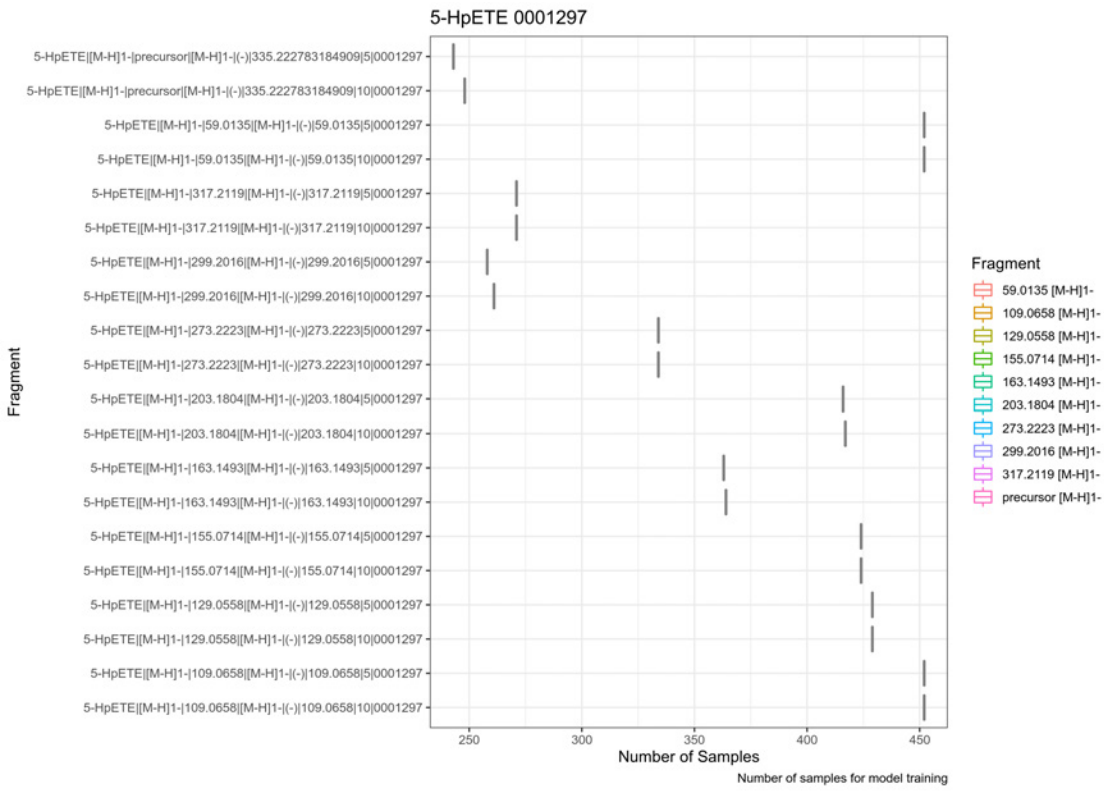

Figure 130. Number of samples used for training per combination Id

# 1.27. 5-OxoETE{d7} [M-H]1- 0000147

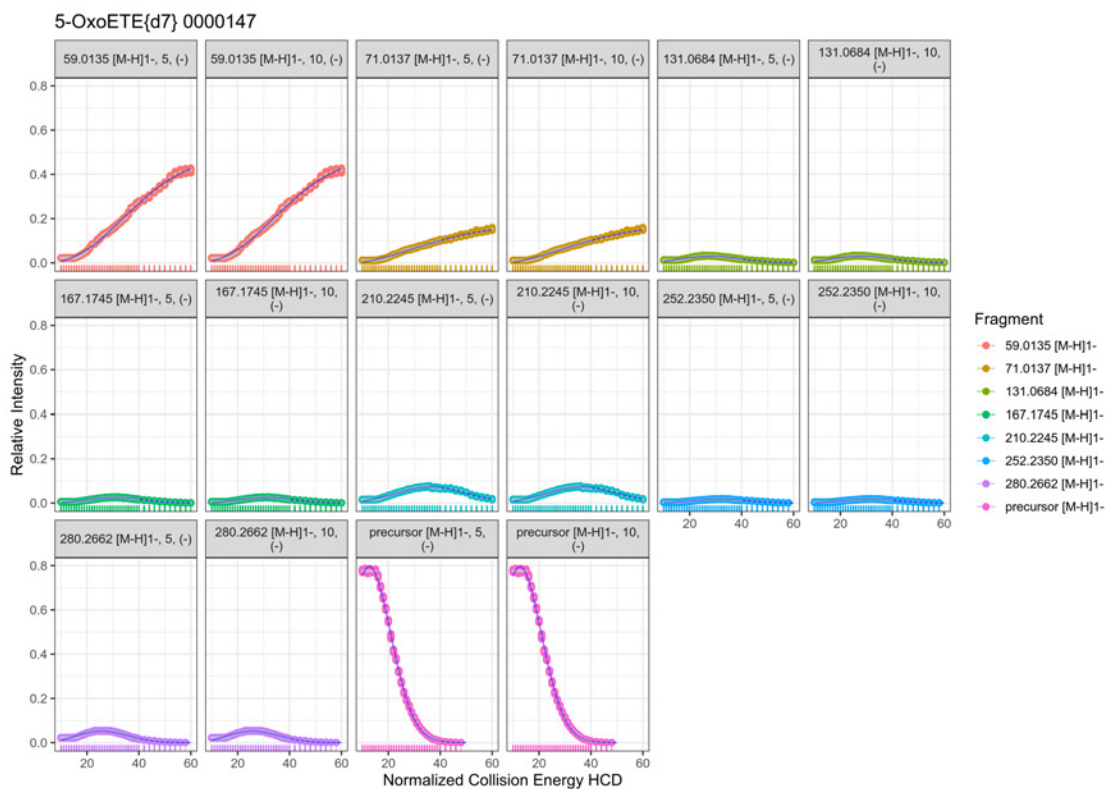

Figure 131. Nonlinear fit

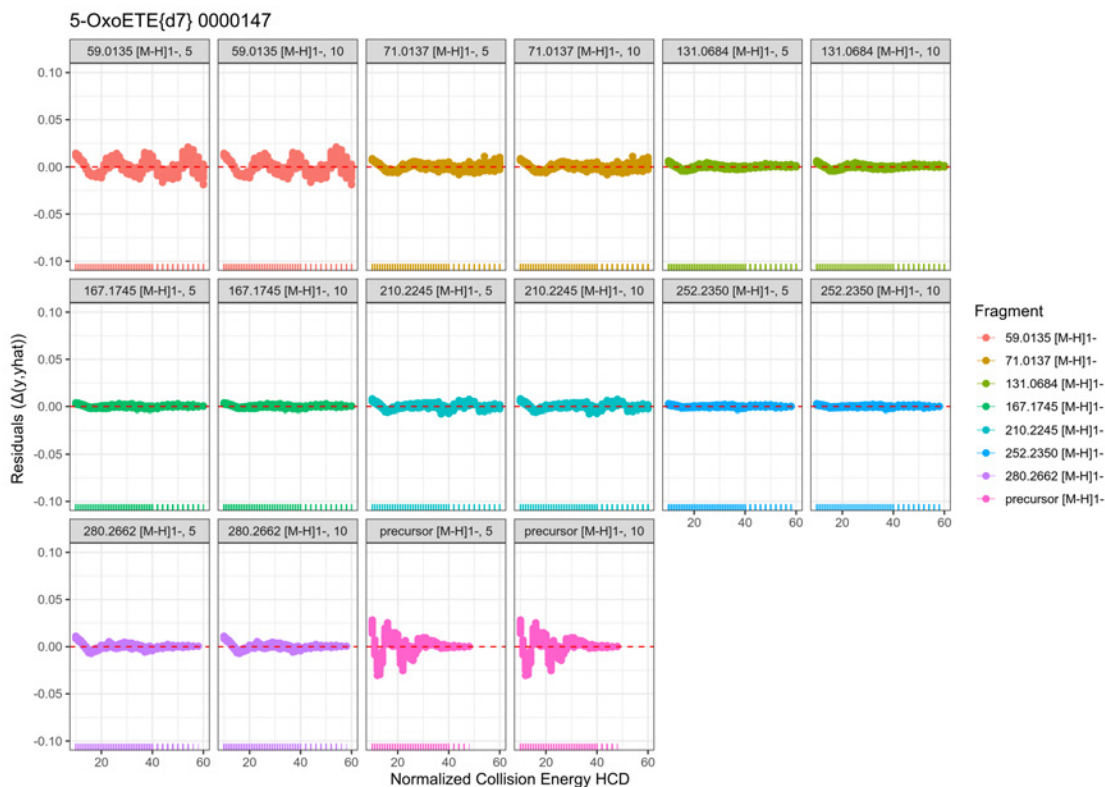

Figure 132. Residuals of nonlinear fit

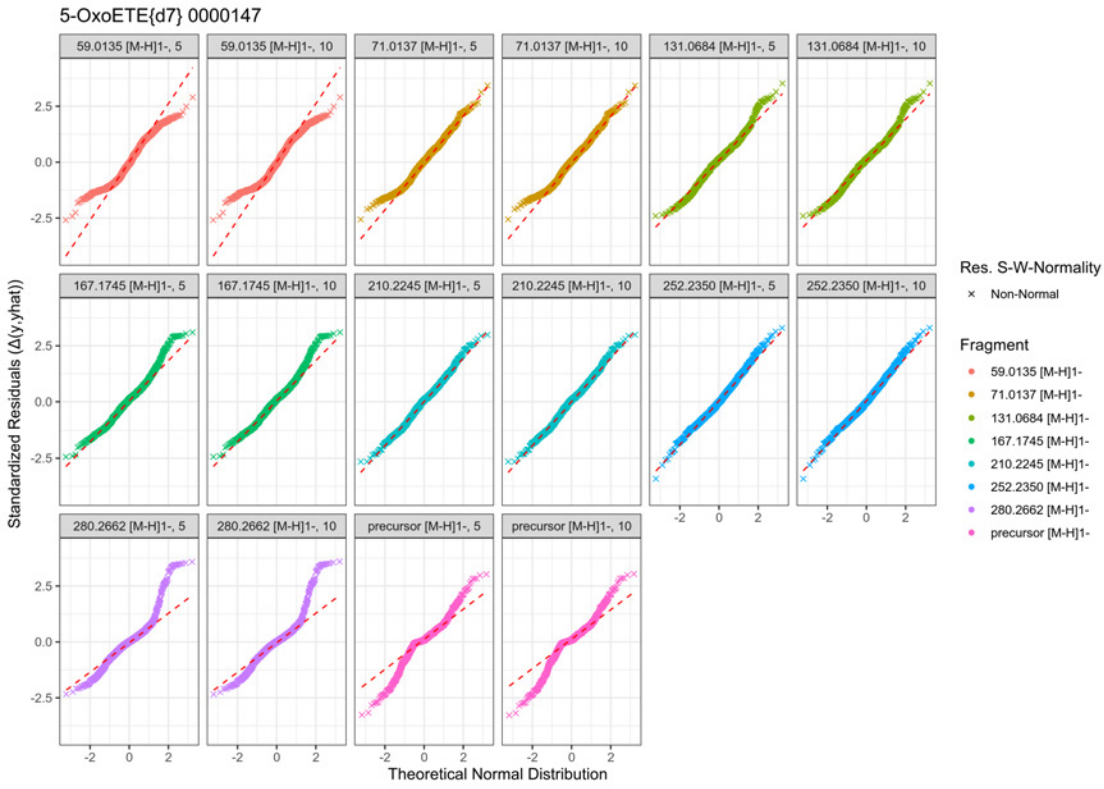

Figure 133. Quantile-quantile plot of residuals

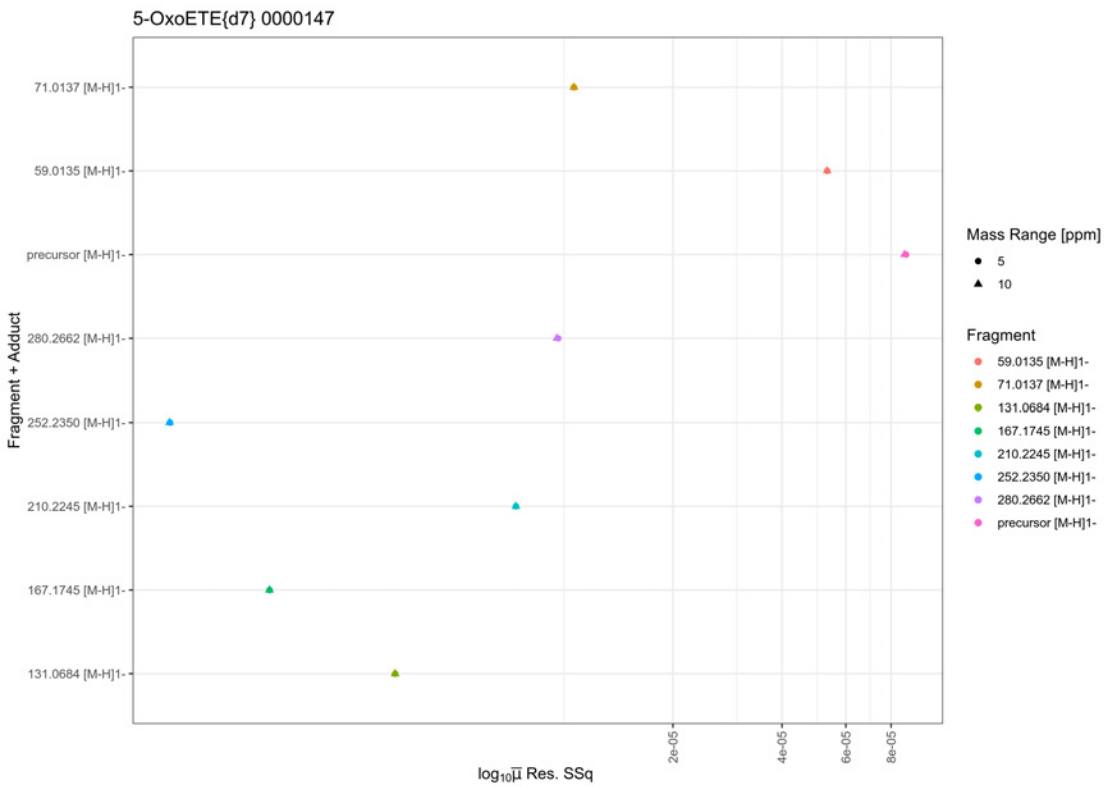

Figure 134. Normalized sum-of-squares of the residuals



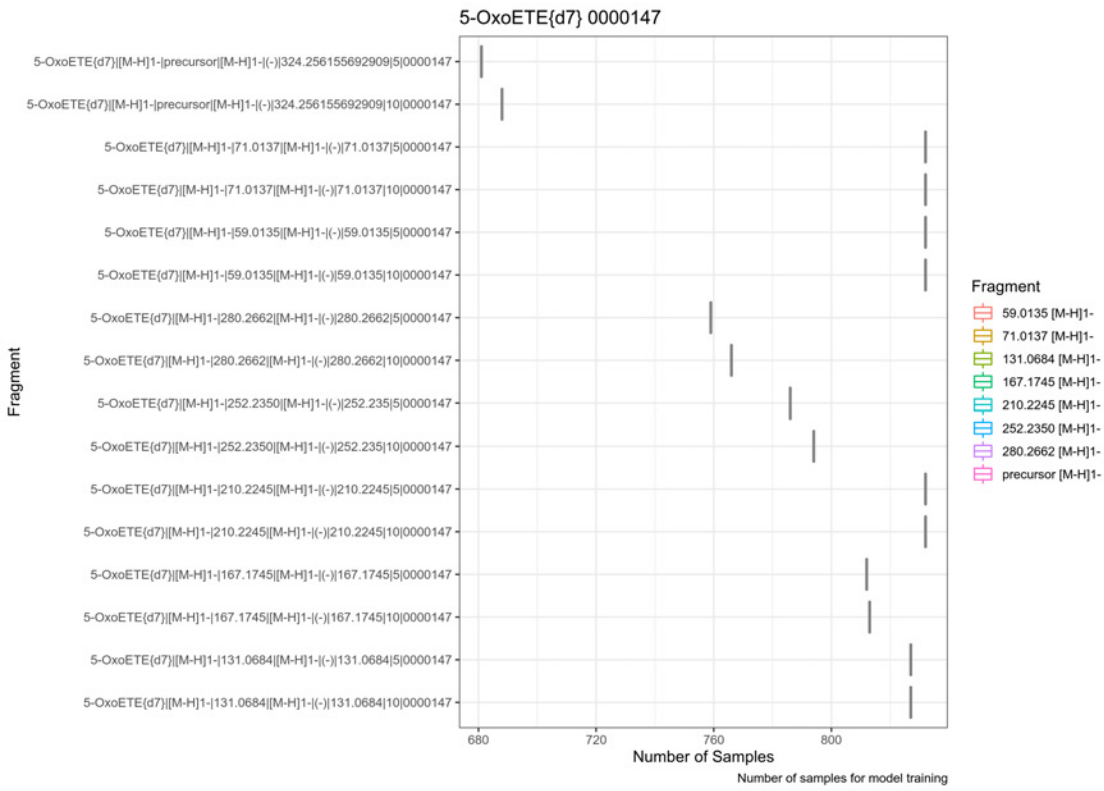

Figure 135. Number of samples used for training per combination Id

# 1.28. 8(9)-EET{d11} [M-H]1- 0001309

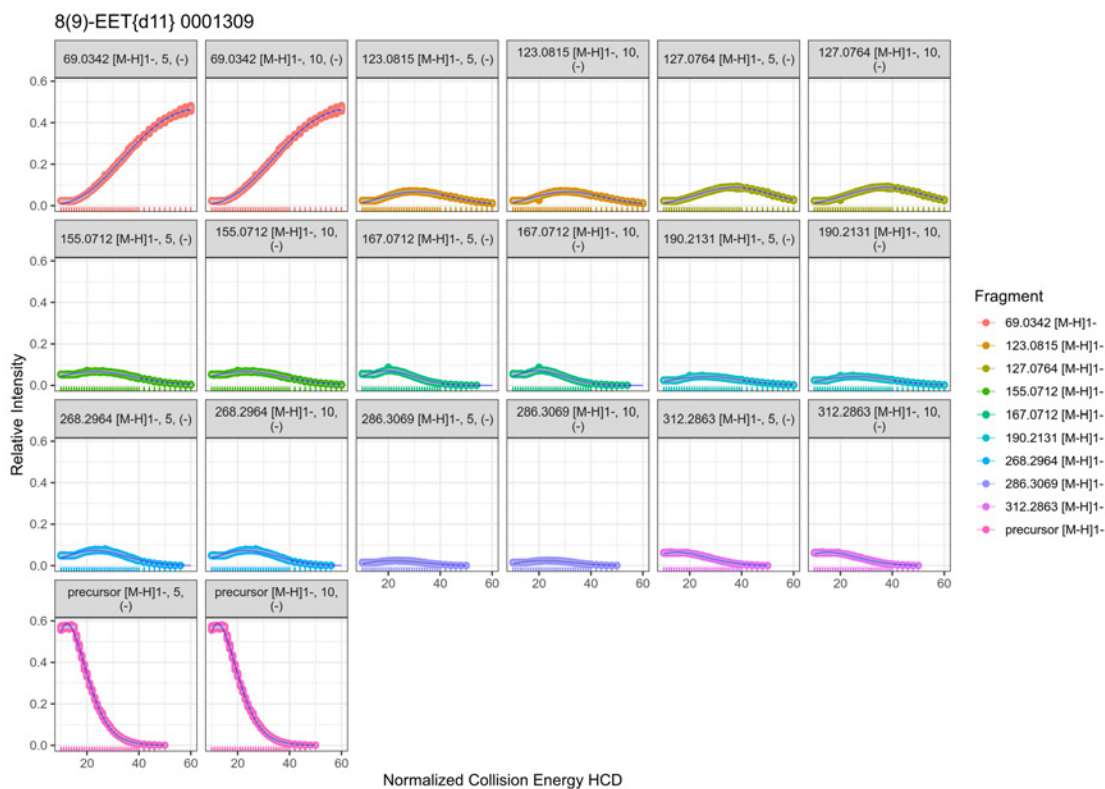

Figure 136. Nonlinear fit

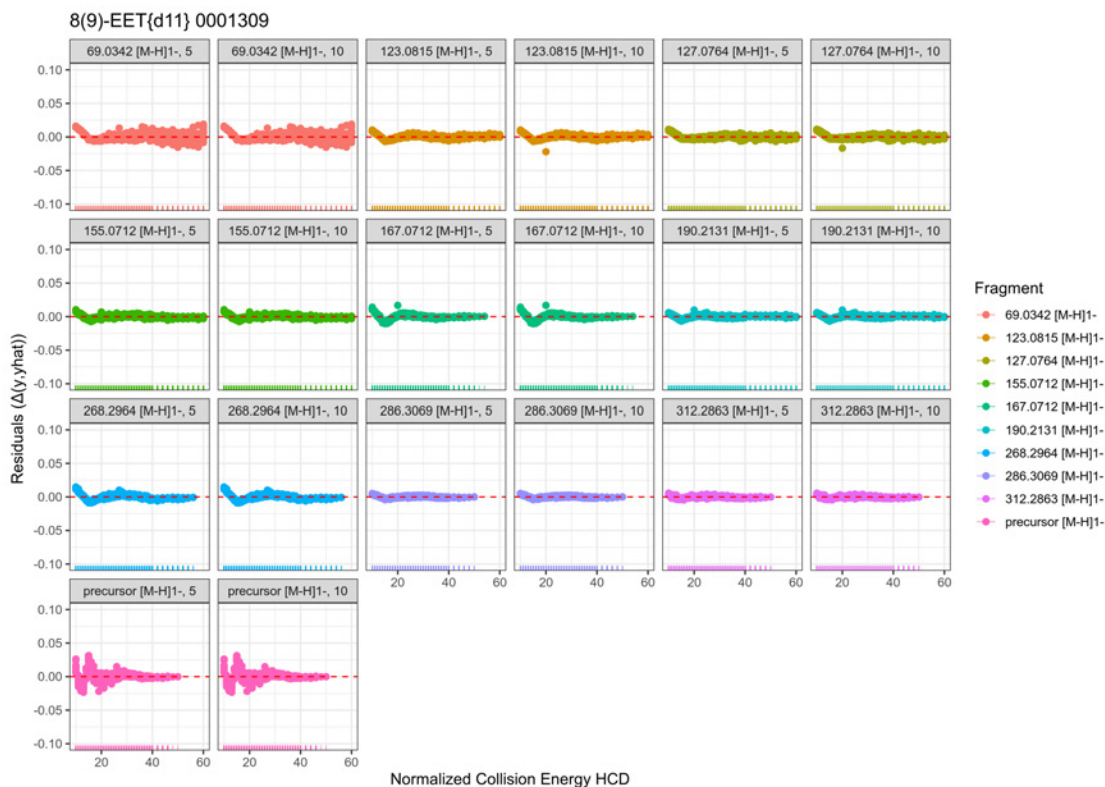

Figure 137. Residuals of nonlinear fit

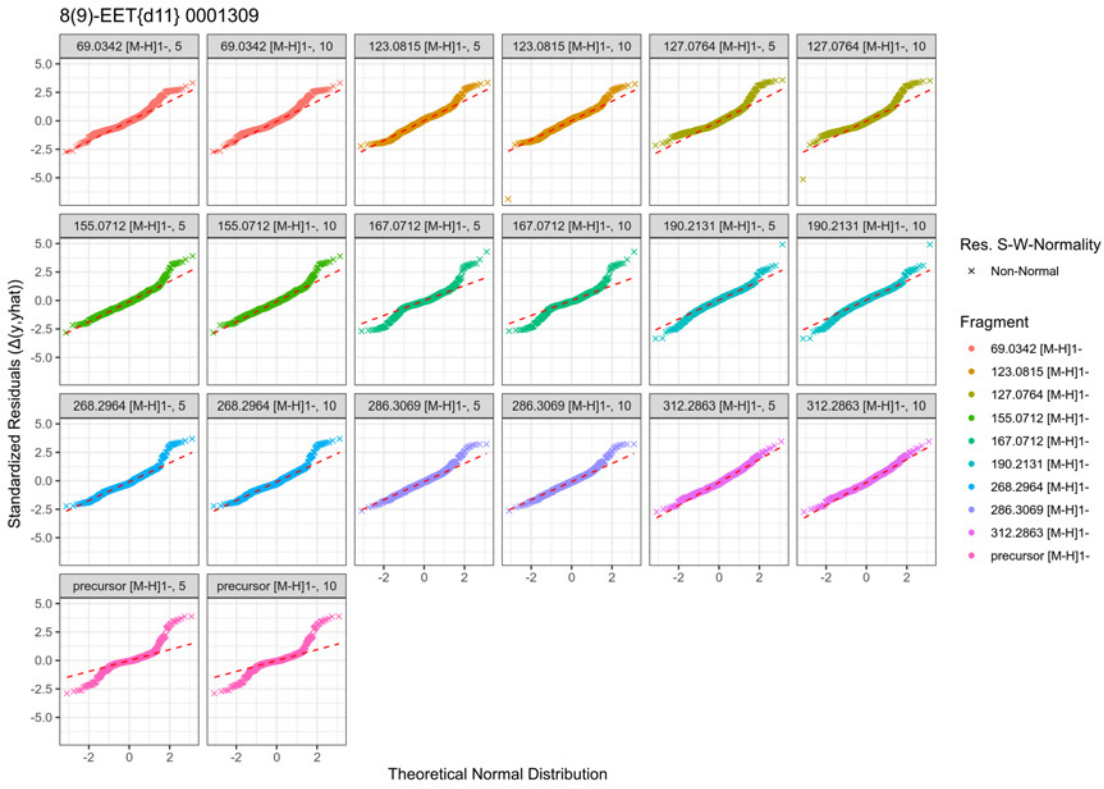

Figure 138. Quantile-quantile plot of residuals

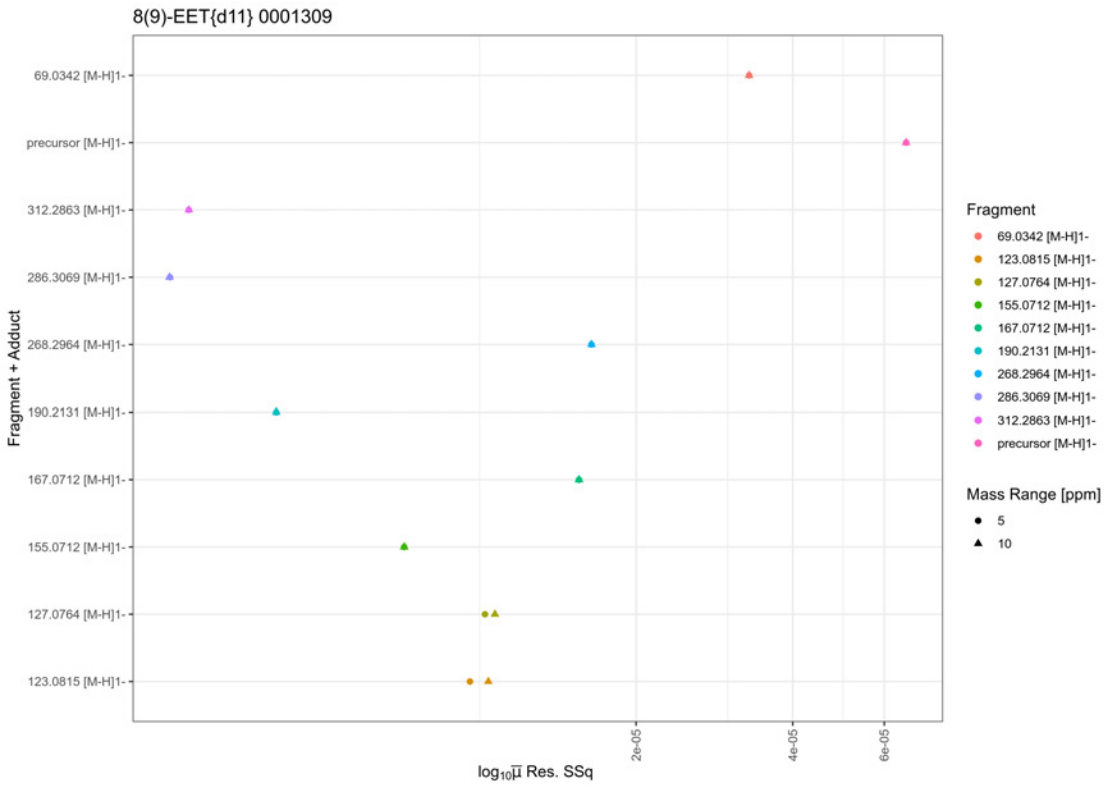

Figure 139. Normalized sum-of-squares of the residuals

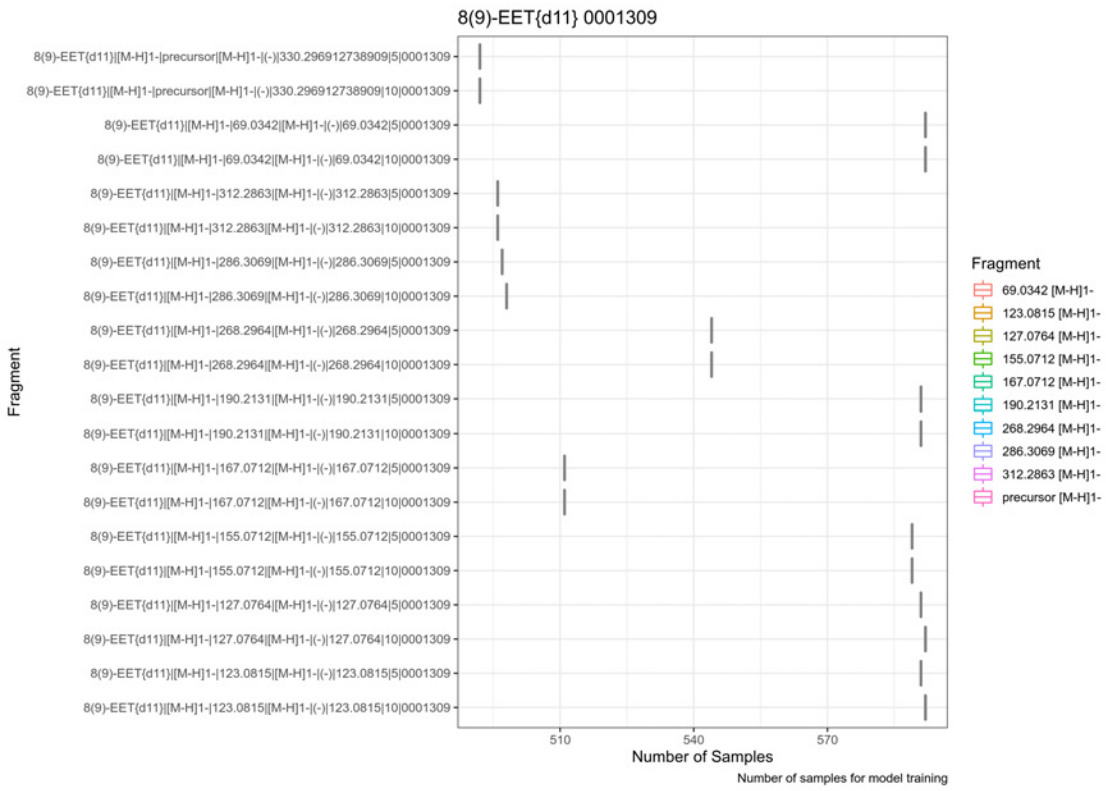

Figure 140. Number of samples used for training per combination Id

# 1.29. 8,9-DHET{d11} [M-H]1- 0000159

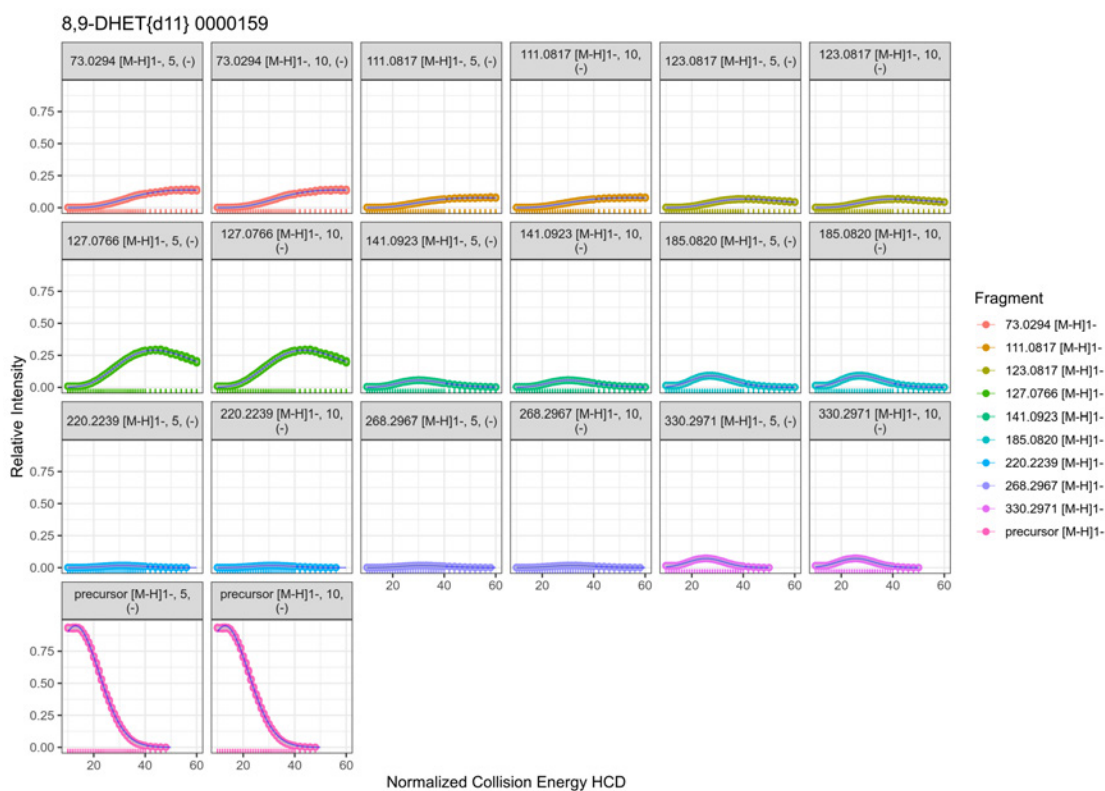

Figure 141. Nonlinear fit

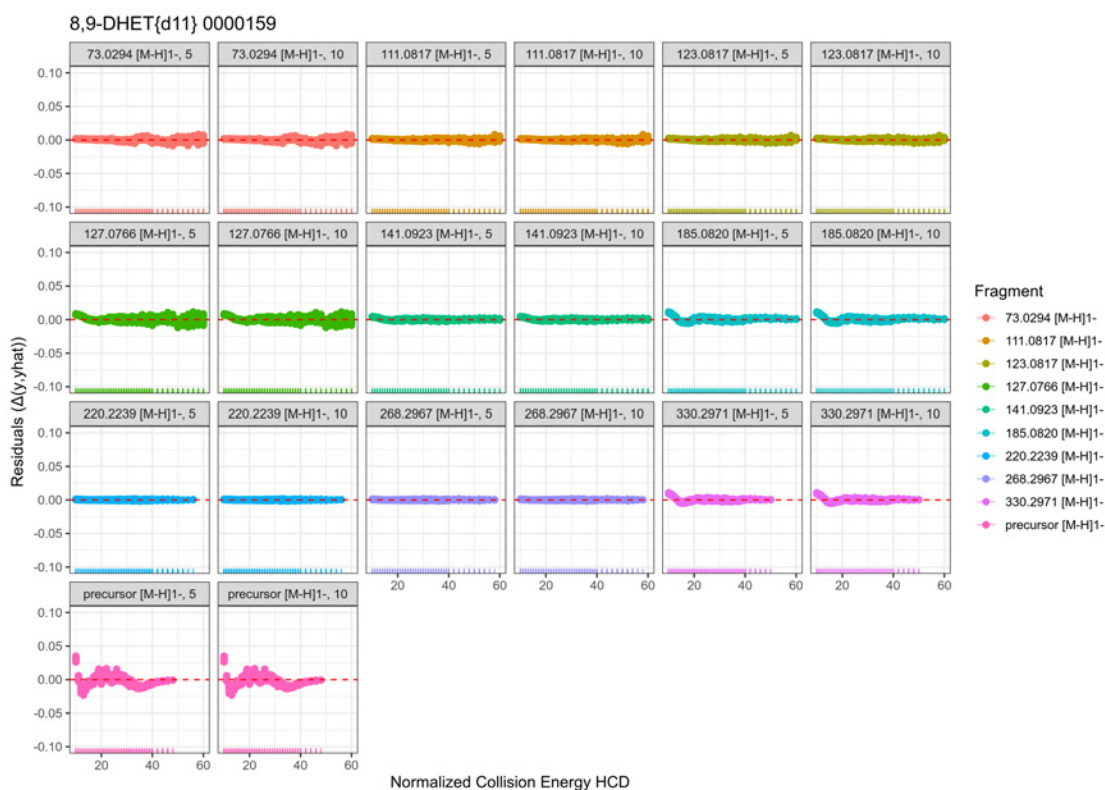

Figure 142. Residuals of nonlinear fit

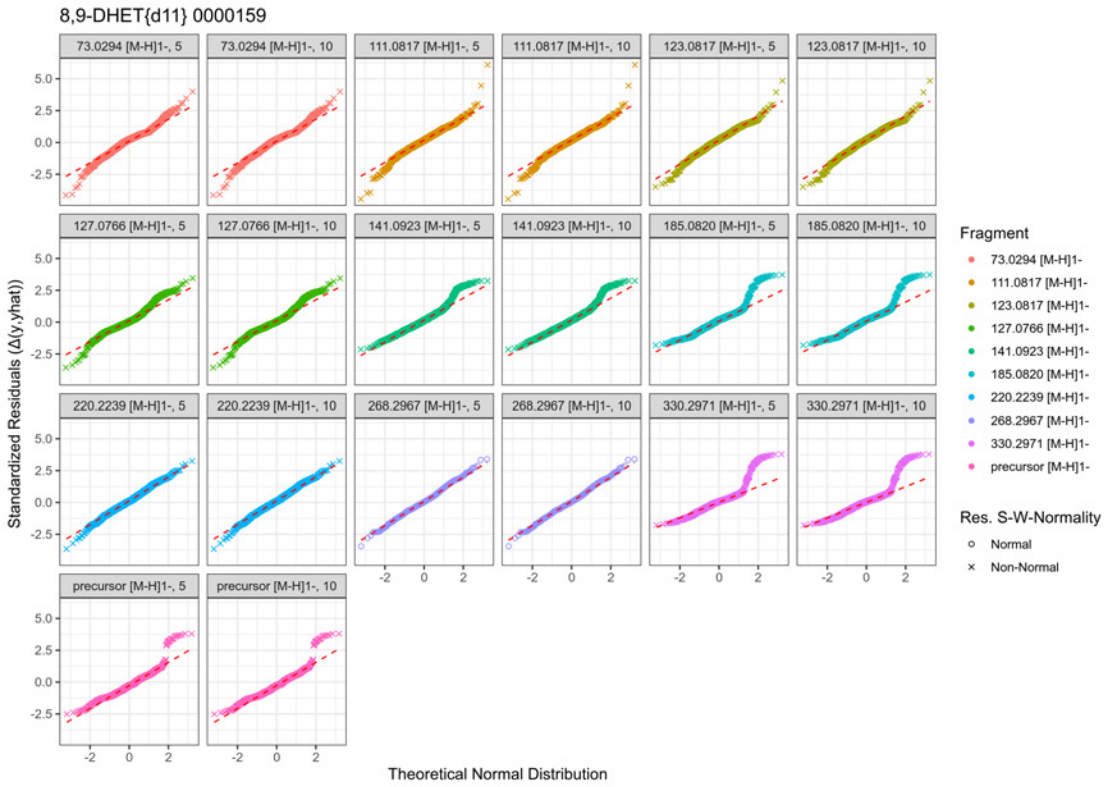

Figure 143. Quantile-quantile plot of residuals

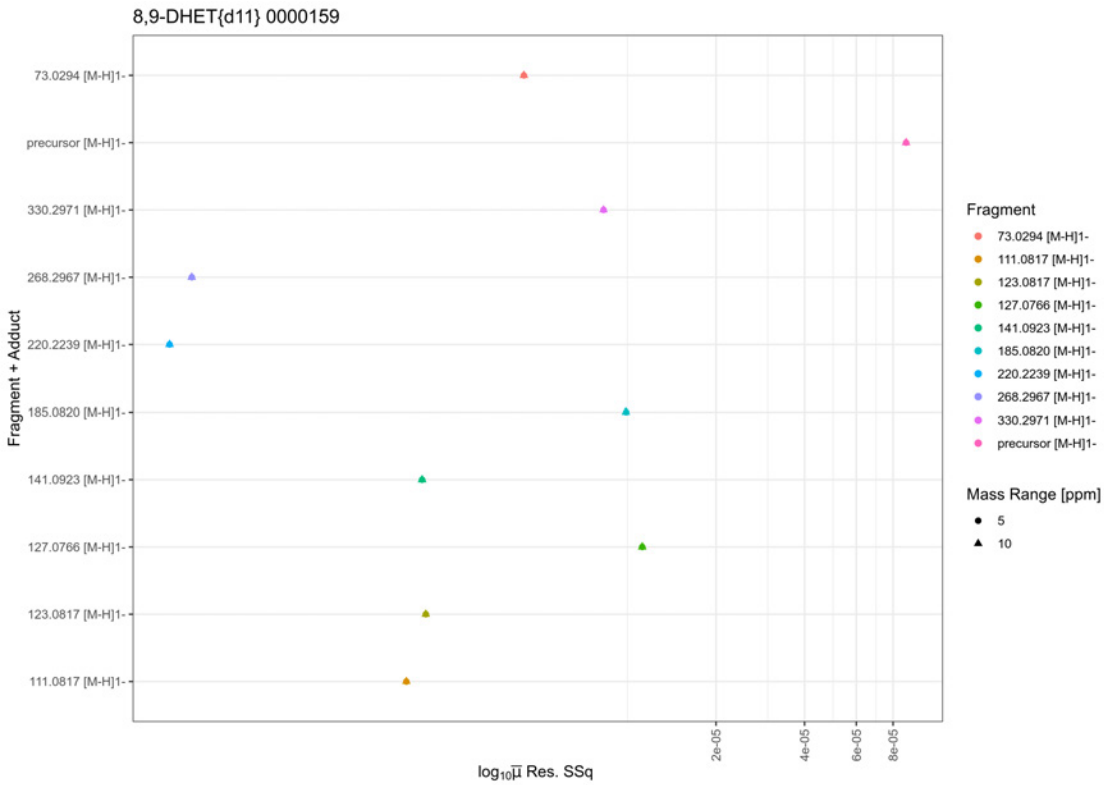

Figure 144. Normalized sum-of-squares of the residuals



8,9-DHET(d11) 0000159

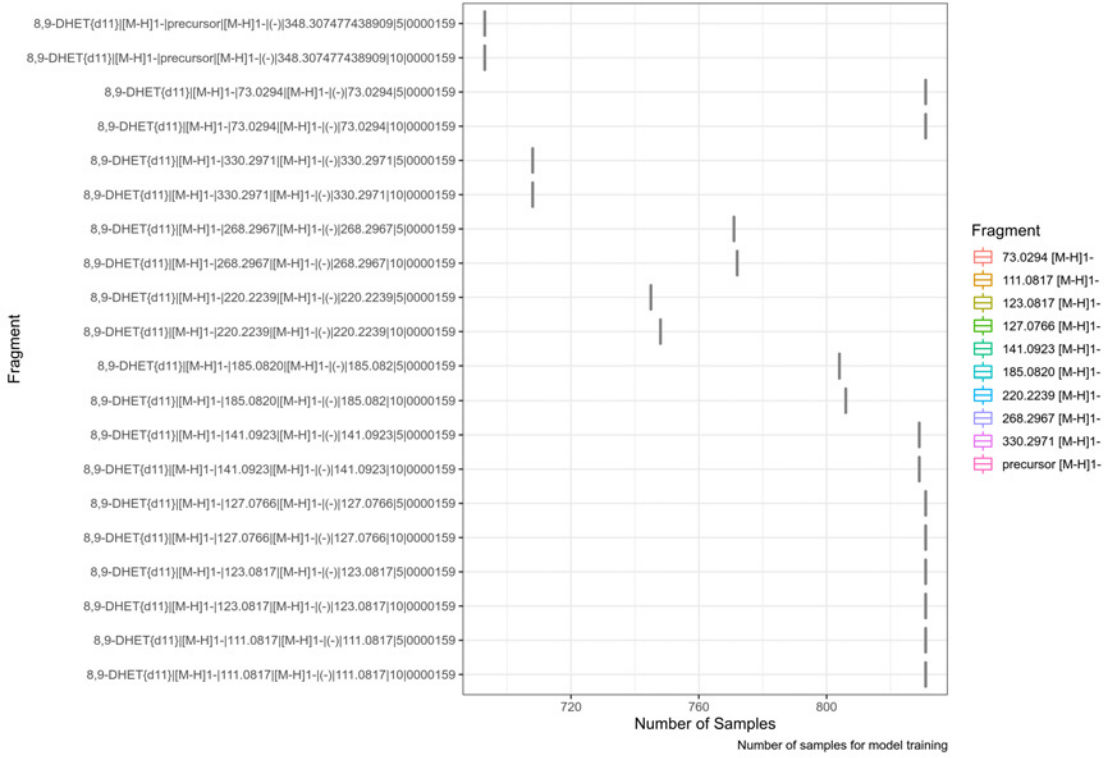

Figure 145. Number of samples used for training per combination Id

# 1.30. 8-HDoHE [M-H]1- 0001273

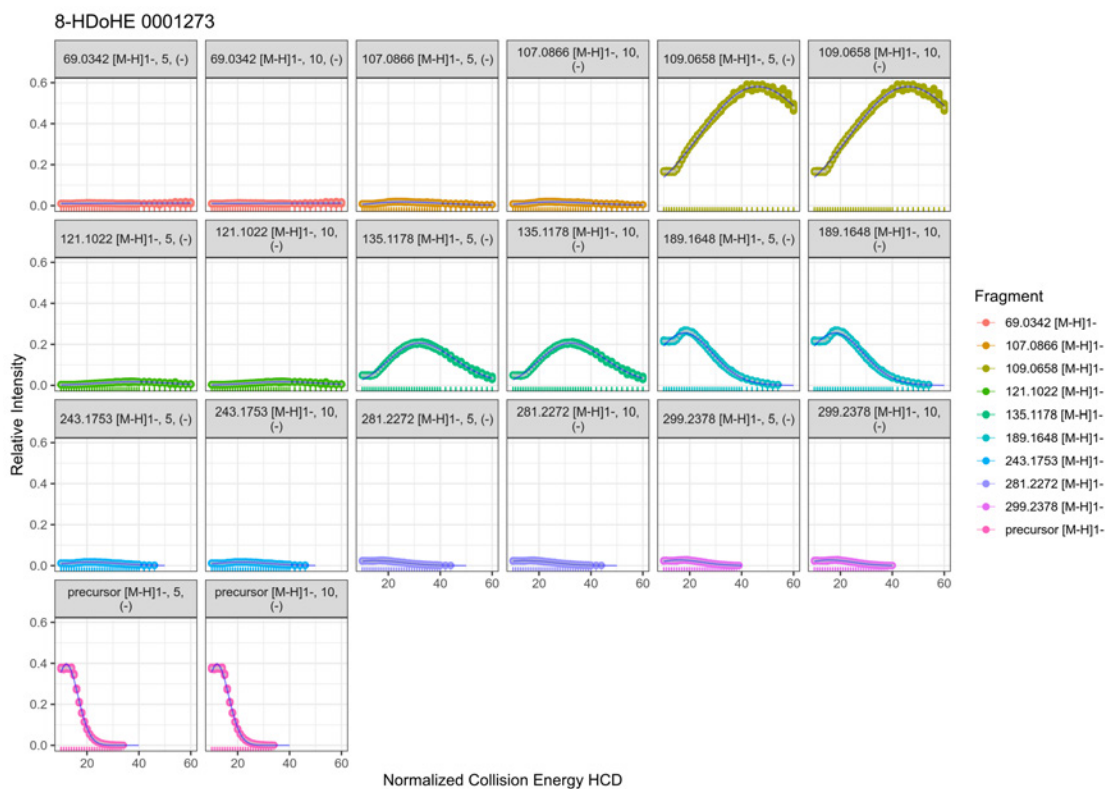

Figure 146. Nonlinear fit

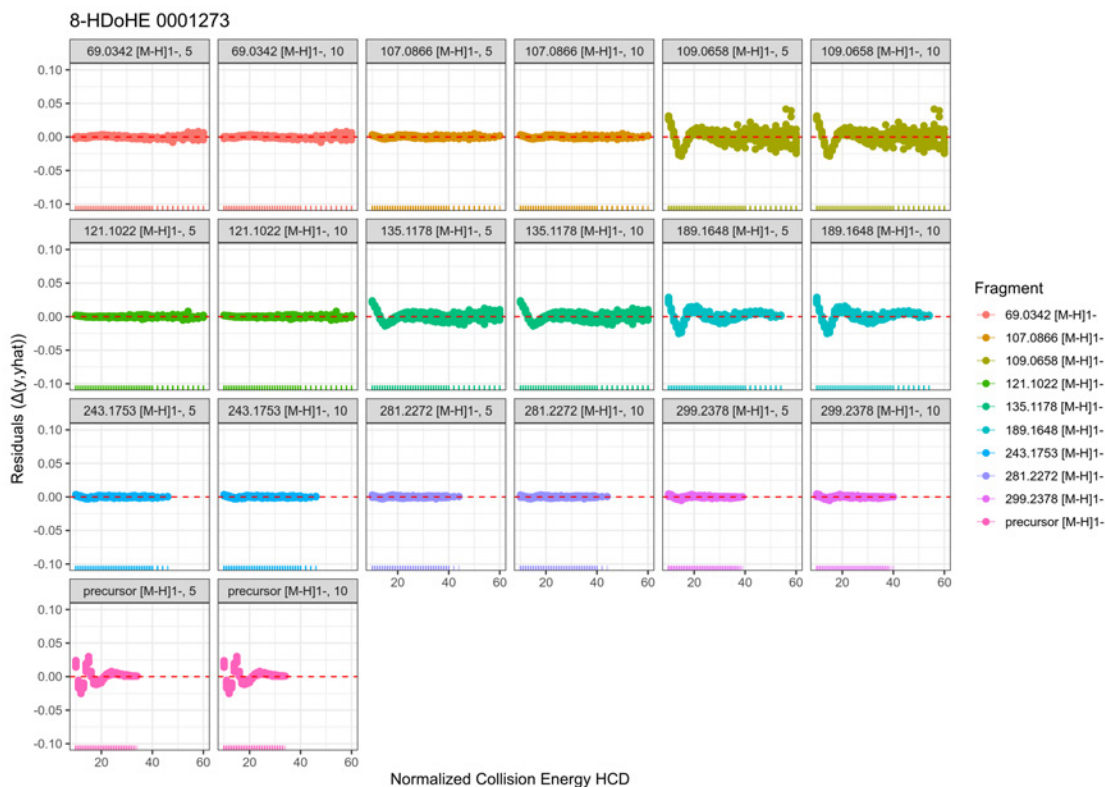

Figure 147. Residuals of nonlinear fit

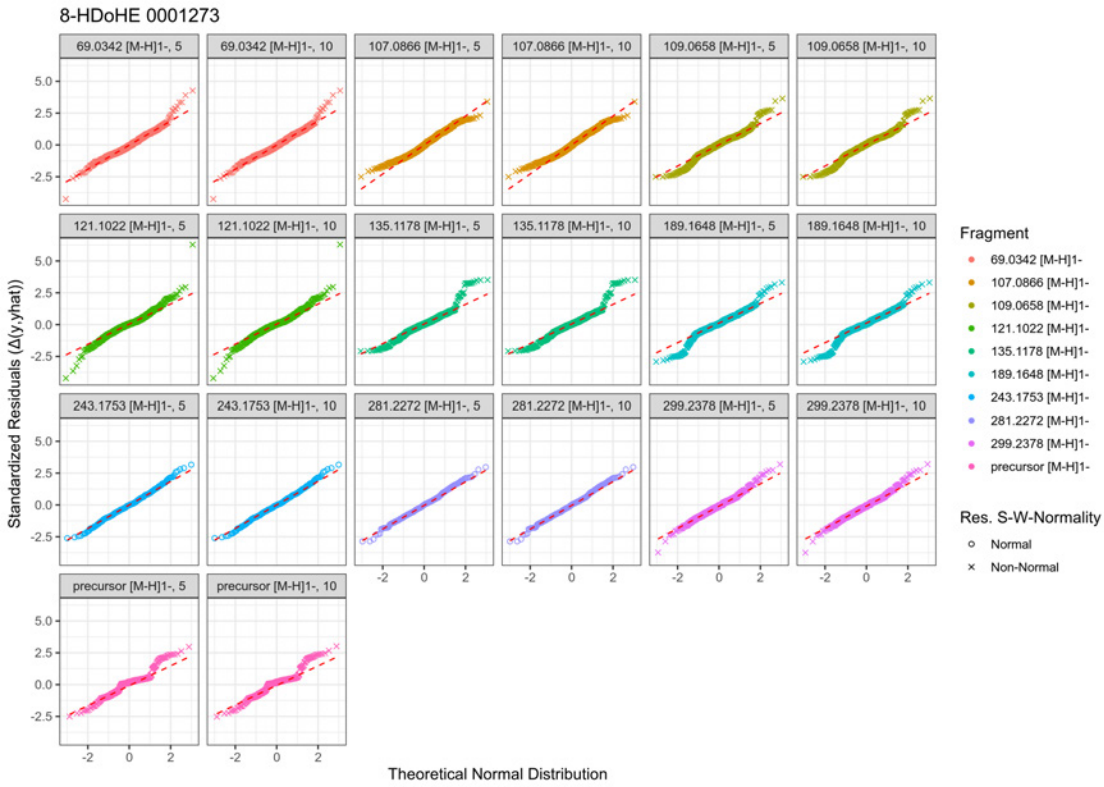

Figure 148. Quantile-quantile plot of residuals

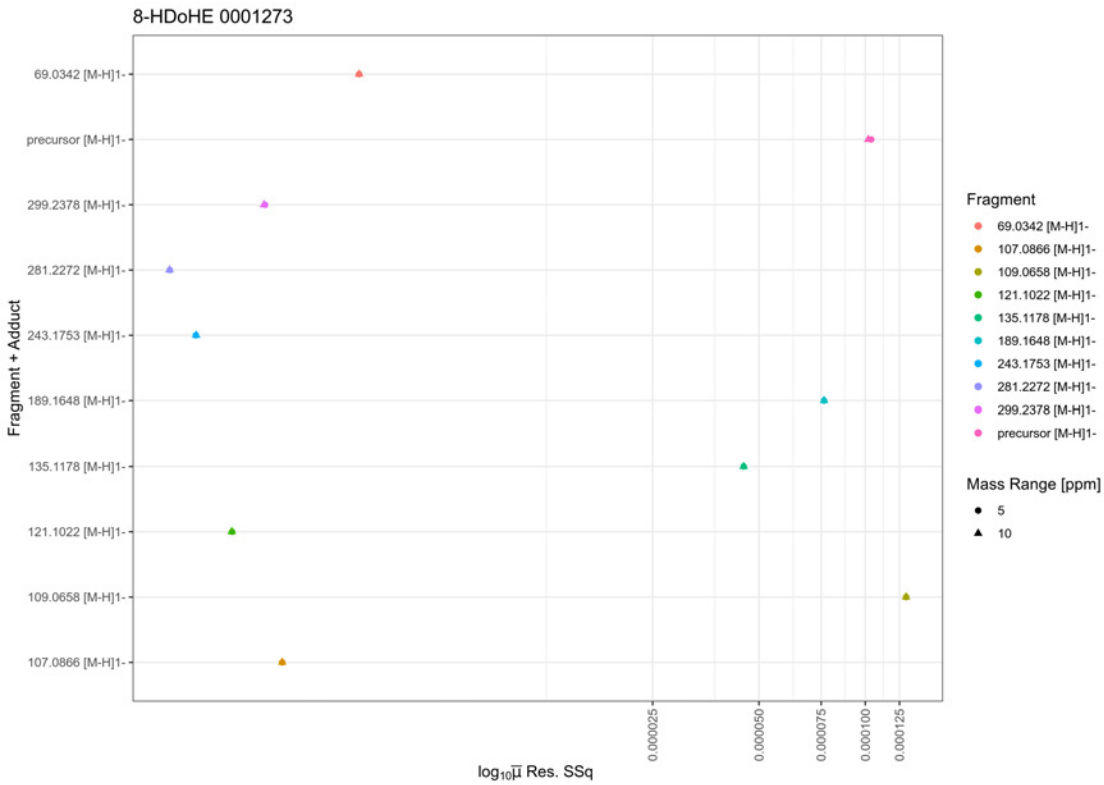

Figure 149. Normalized sum-of-squares of the residuals

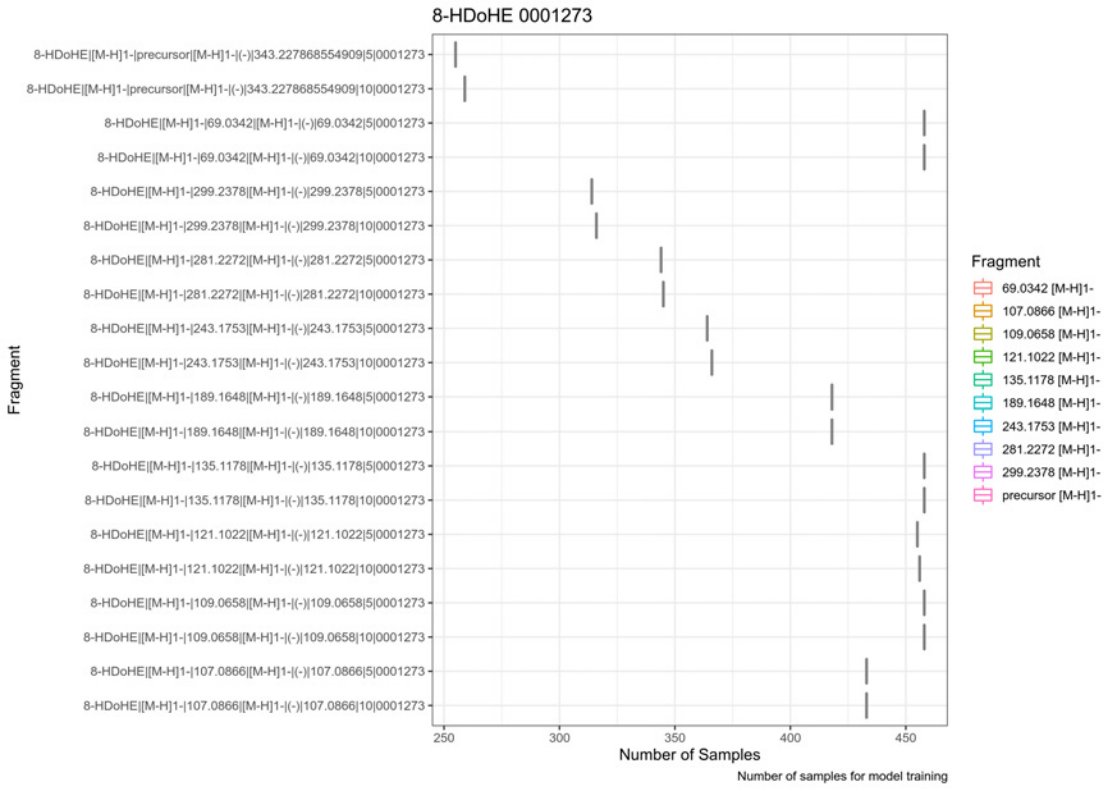

Figure 150. Number of samples used for training per combination Id

# 1.31. 8-HETE [M-H]1- 0001287

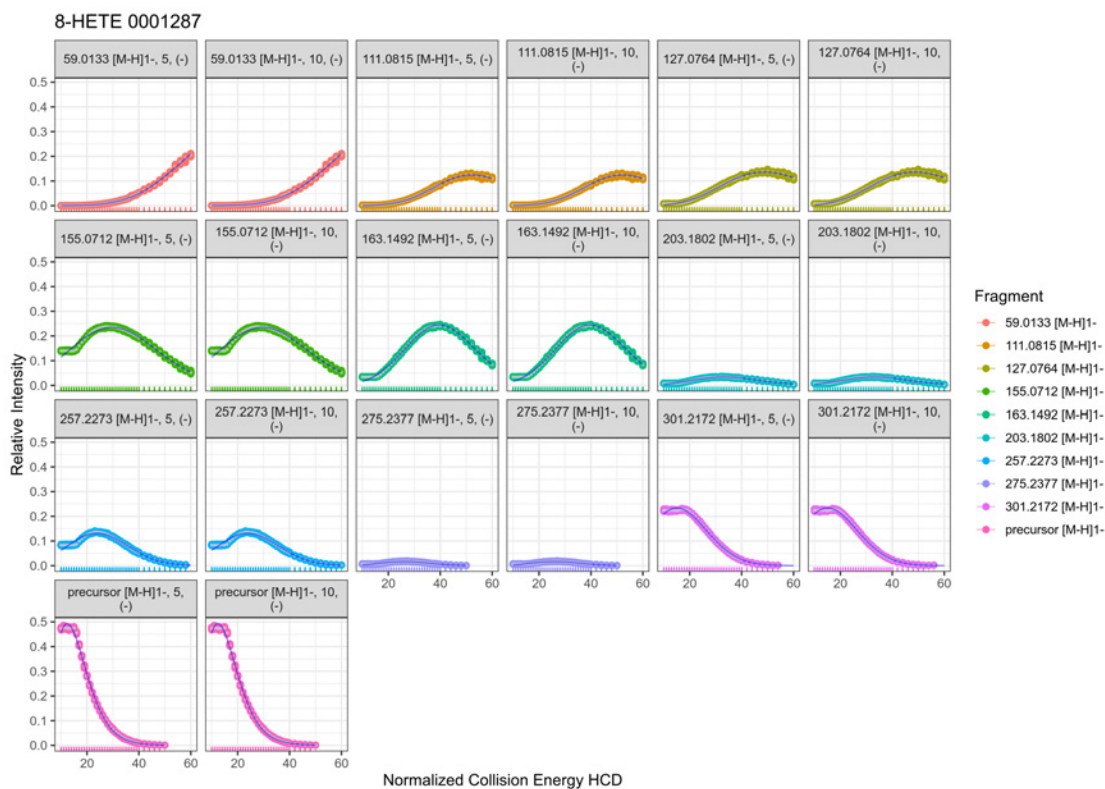

Figure 151. Nonlinear fit

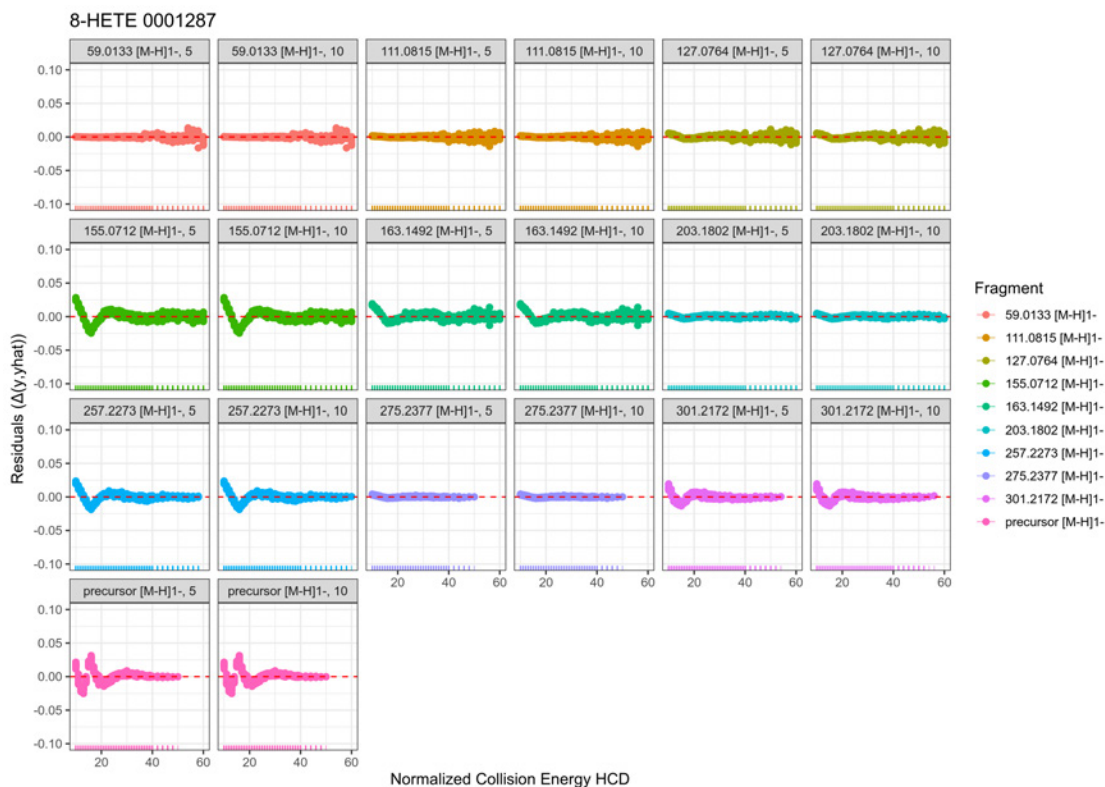

Figure 152. Residuals of nonlinear fit

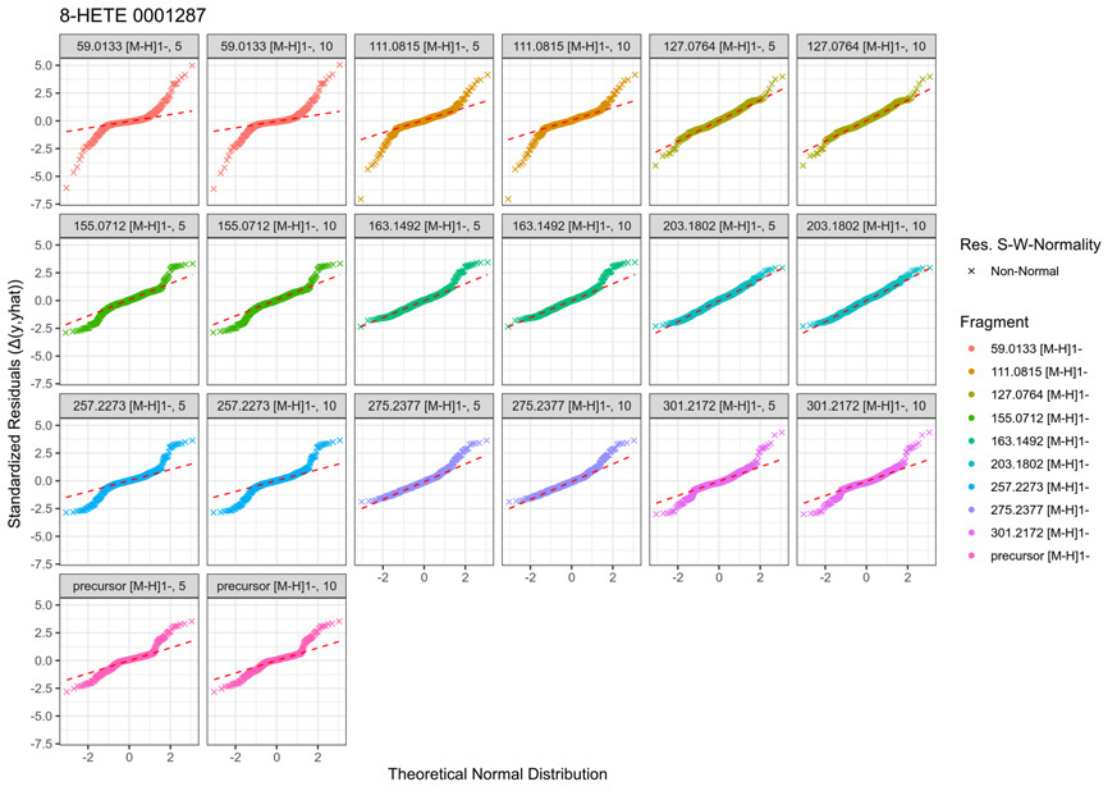

Figure 153. Quantile-quantile plot of residuals

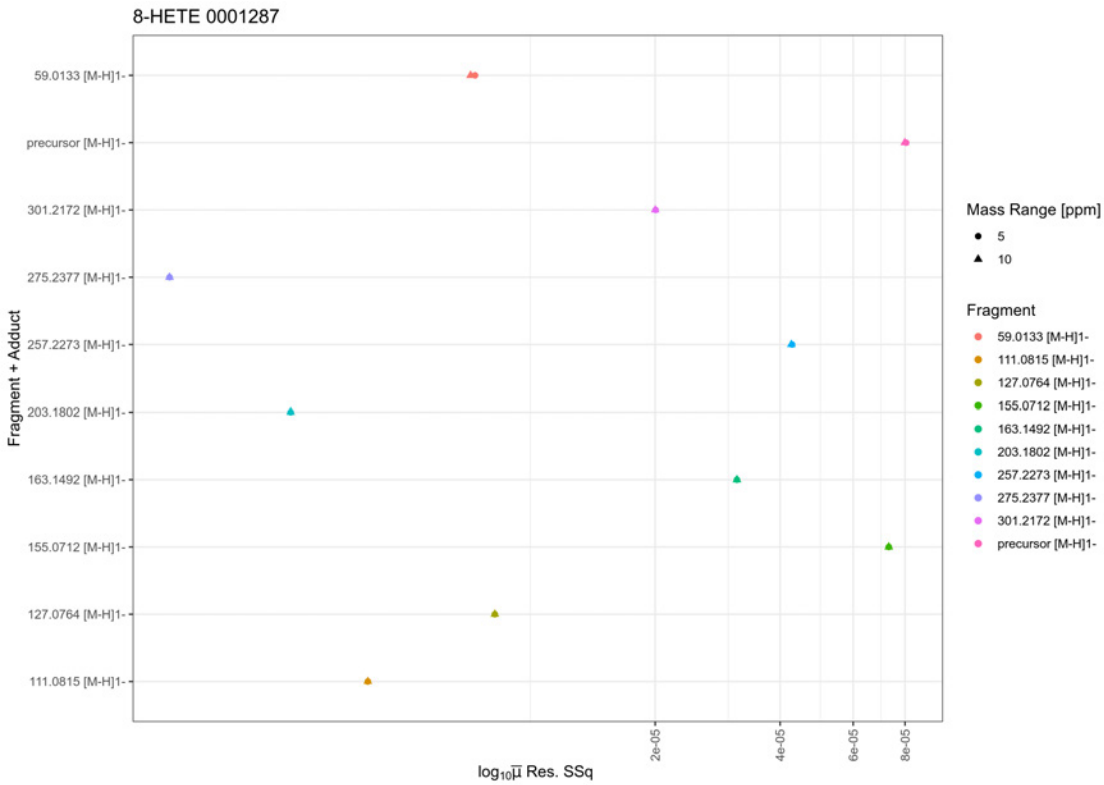

Figure 154. Normalized sum-of-squares of the residuals



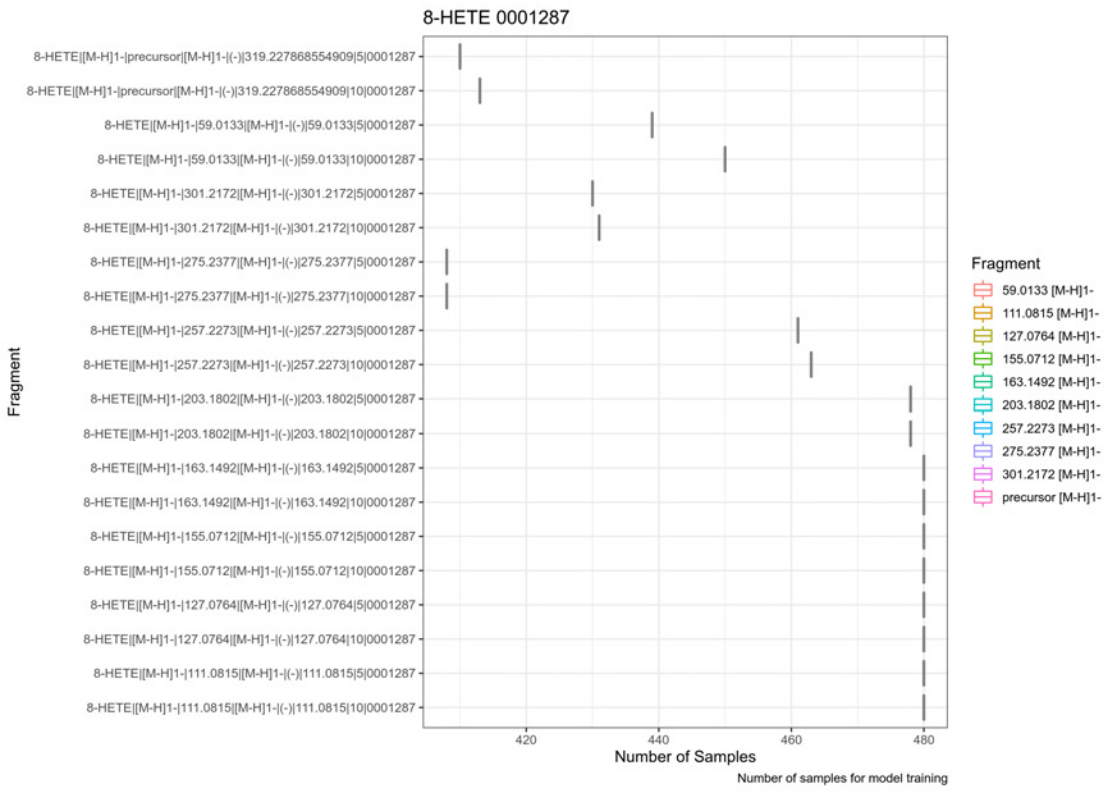

Figure 155. Number of samples used for training per combination Id

# 1.32. 9(10)-EpOME{d4} [M-H]1- 0001355

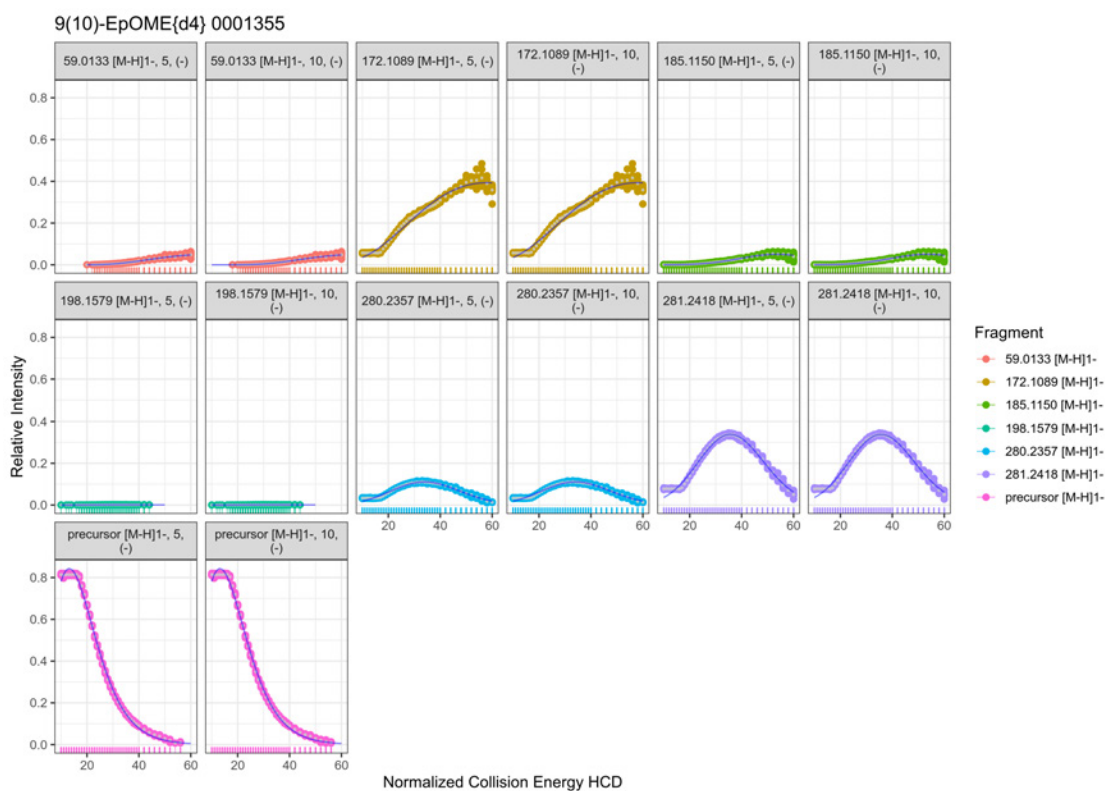

Figure 156. Nonlinear fit

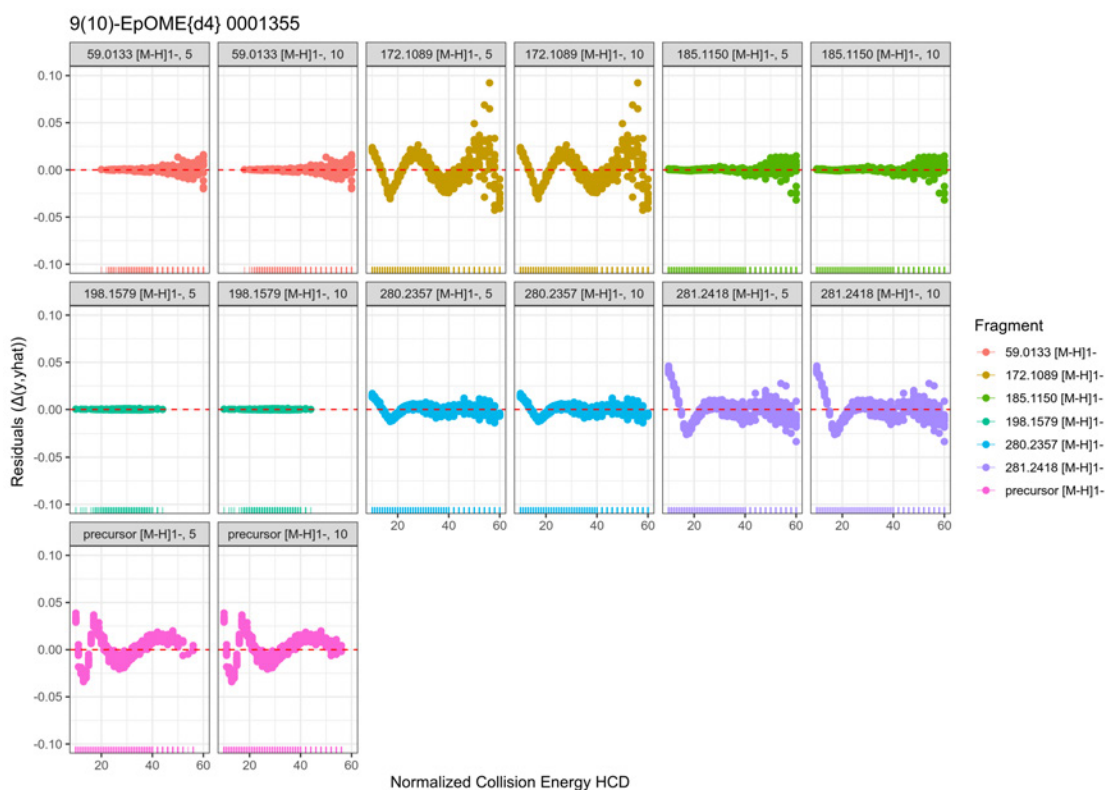

Figure 157. Residuals of nonlinear fit

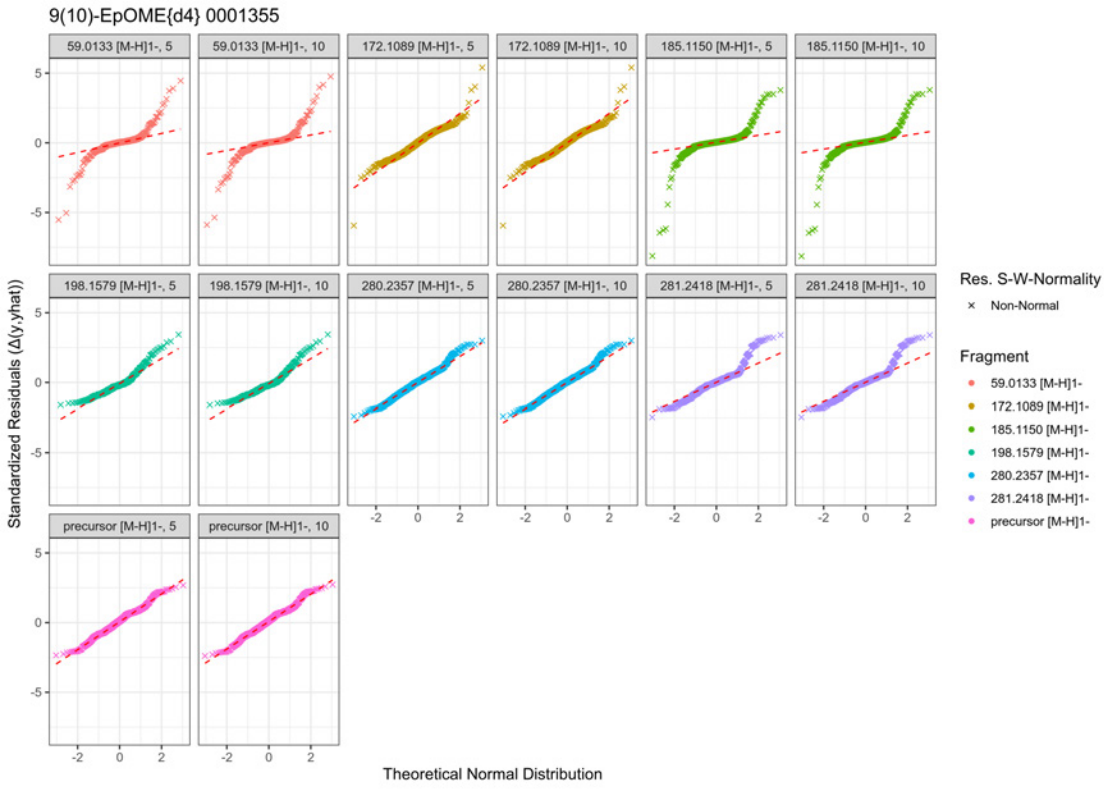

Figure 158. Quantile-quantile plot of residuals

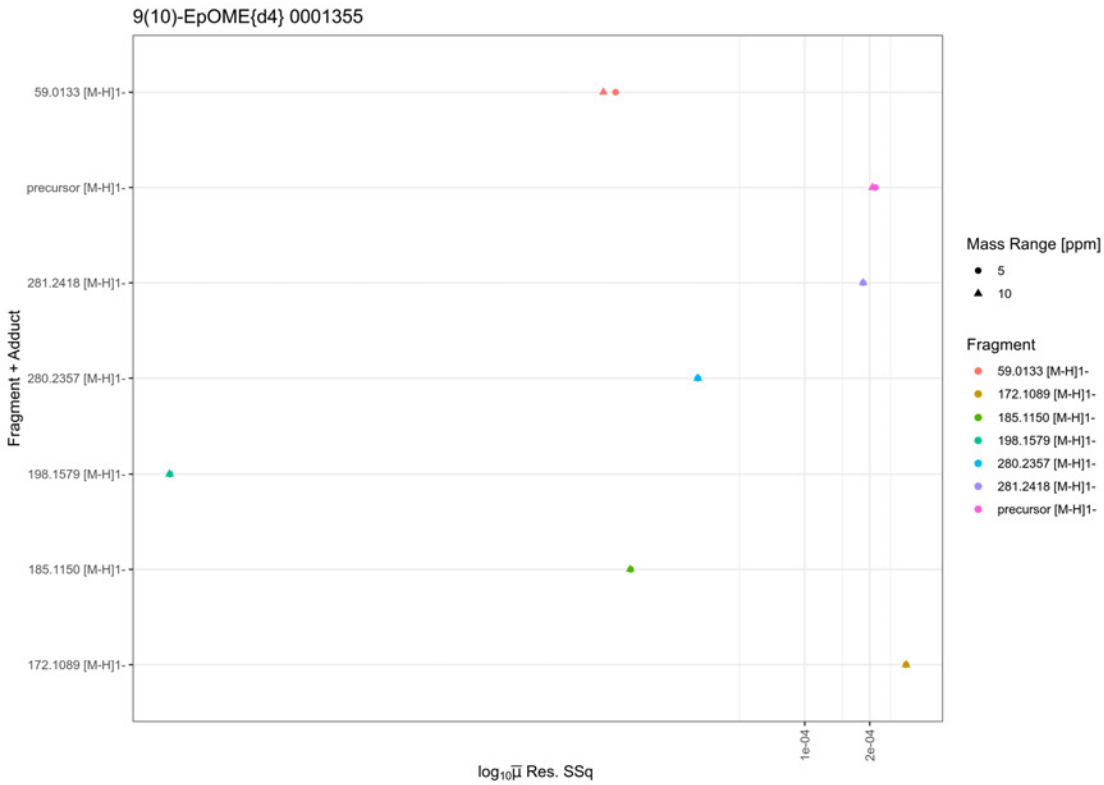

Figure 159. Normalized sum-of-squares of the residuals

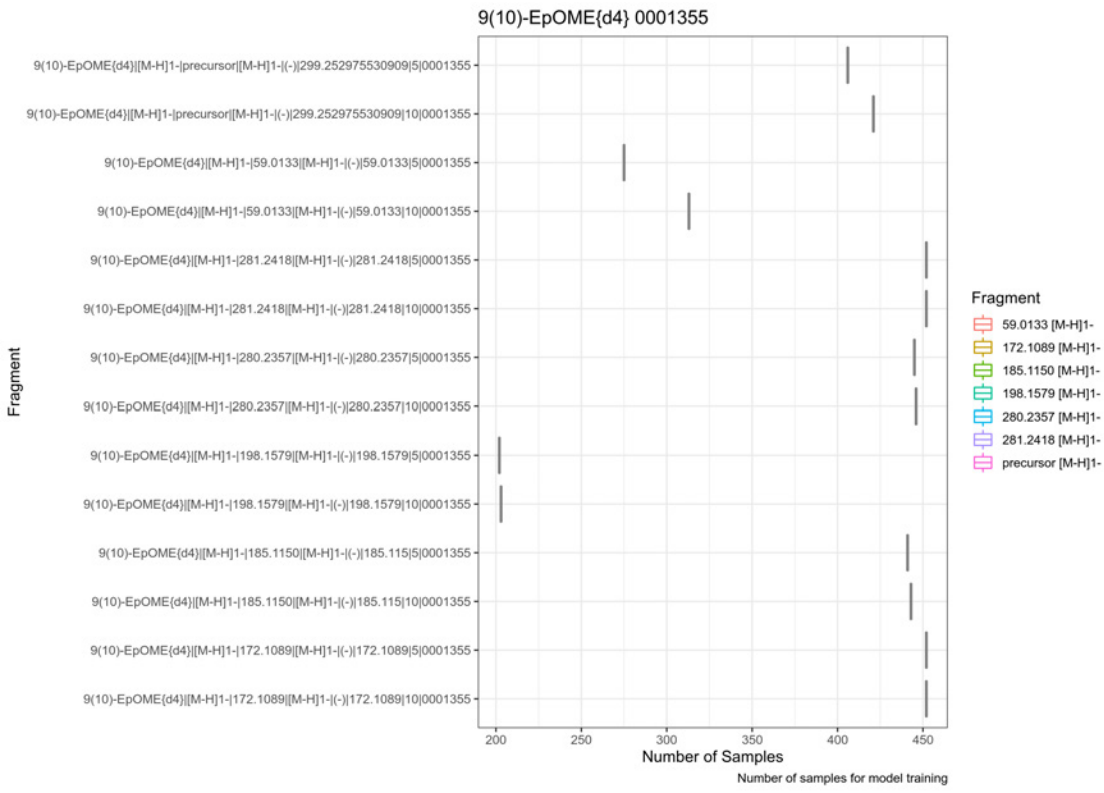

Figure 160. Number of samples used for training per combination Id

# 1.33. 9-HEPE [M-H]1- 0001279

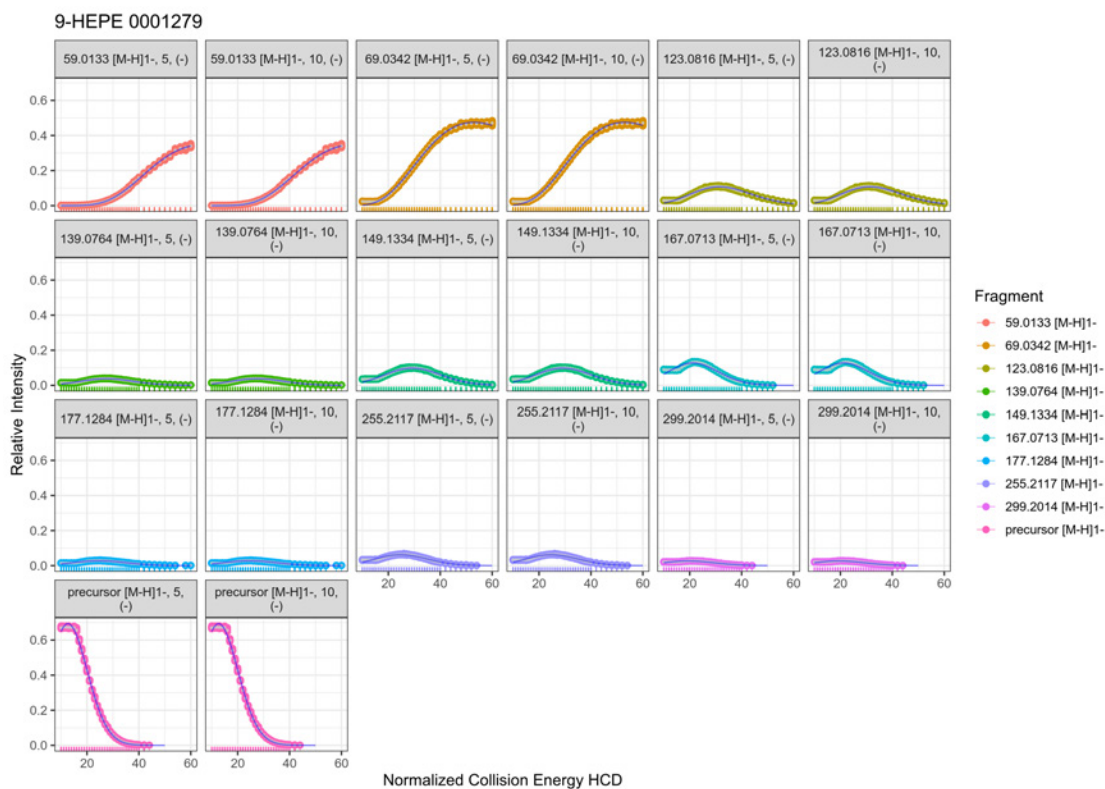

Figure 161. Nonlinear fit

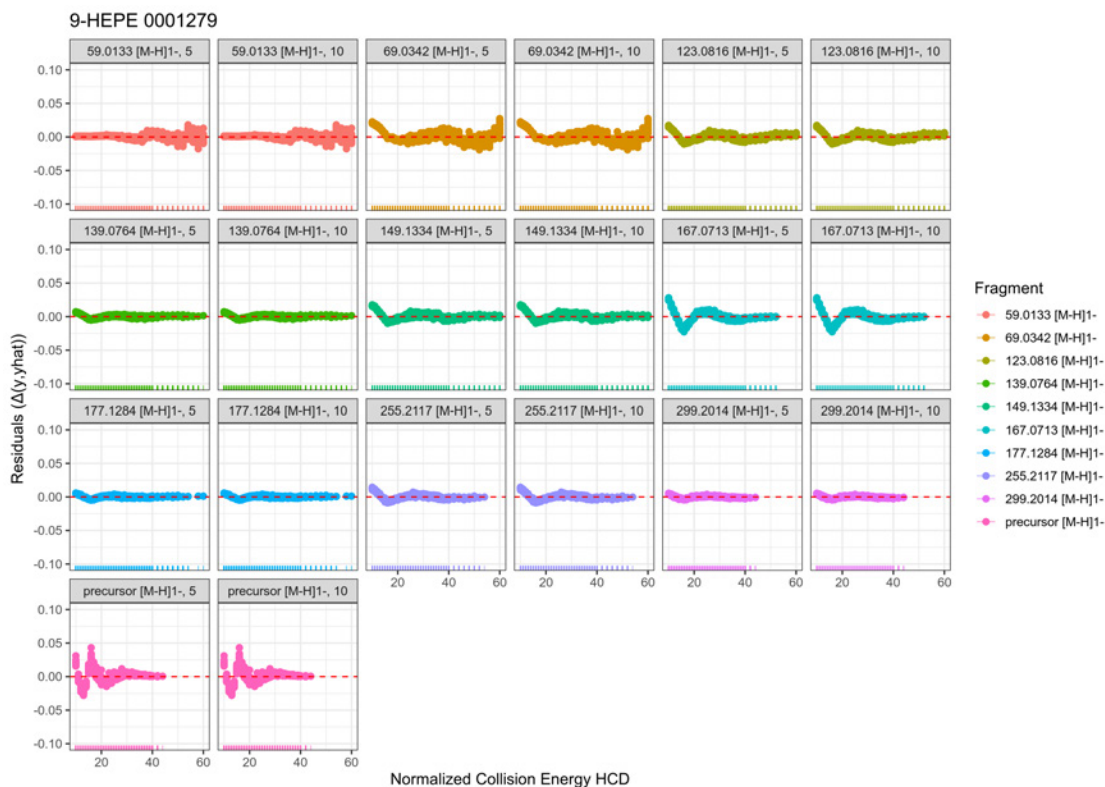

Figure 162. Residuals of nonlinear fit

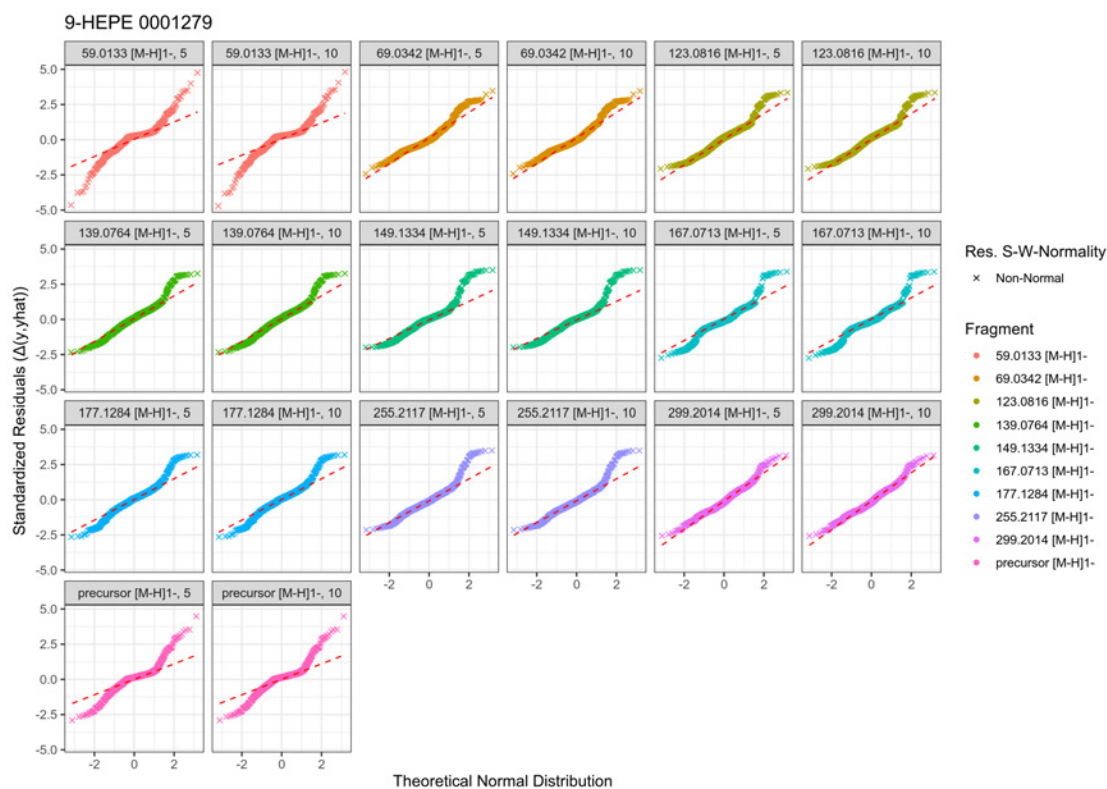

Figure 163. Quantile-quantile plot of residuals

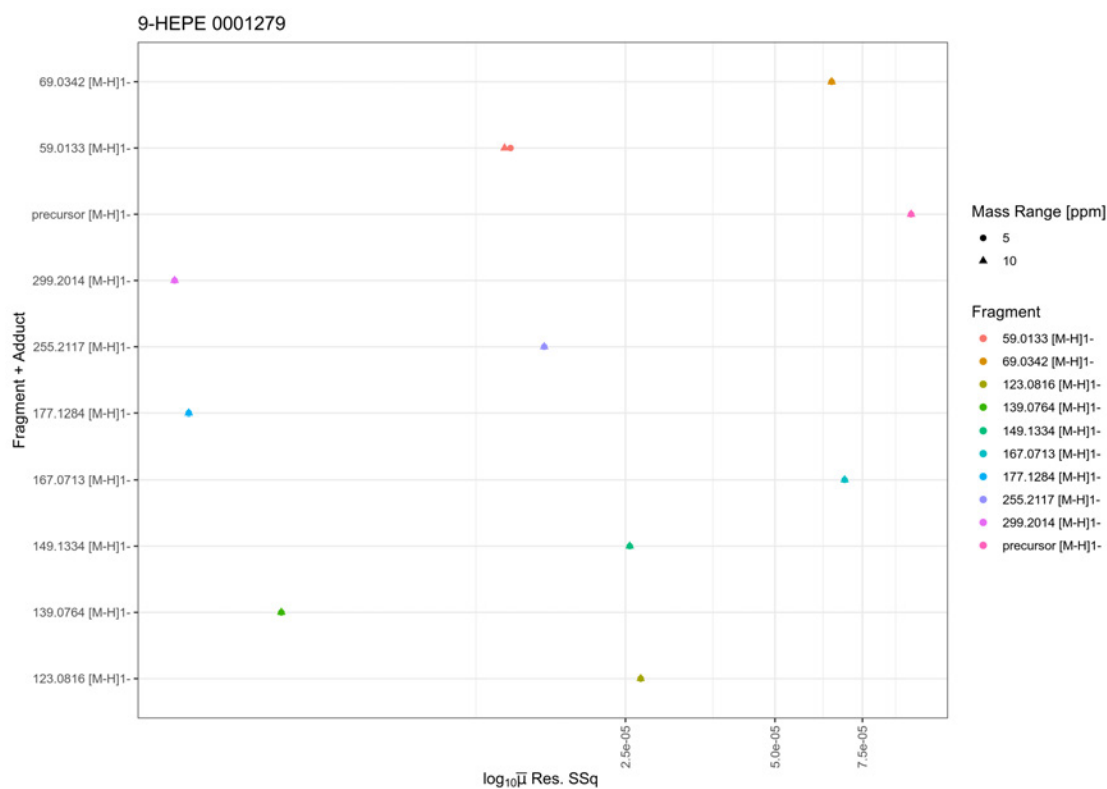

Figure 164. Normalized sum-of-squares of the residuals



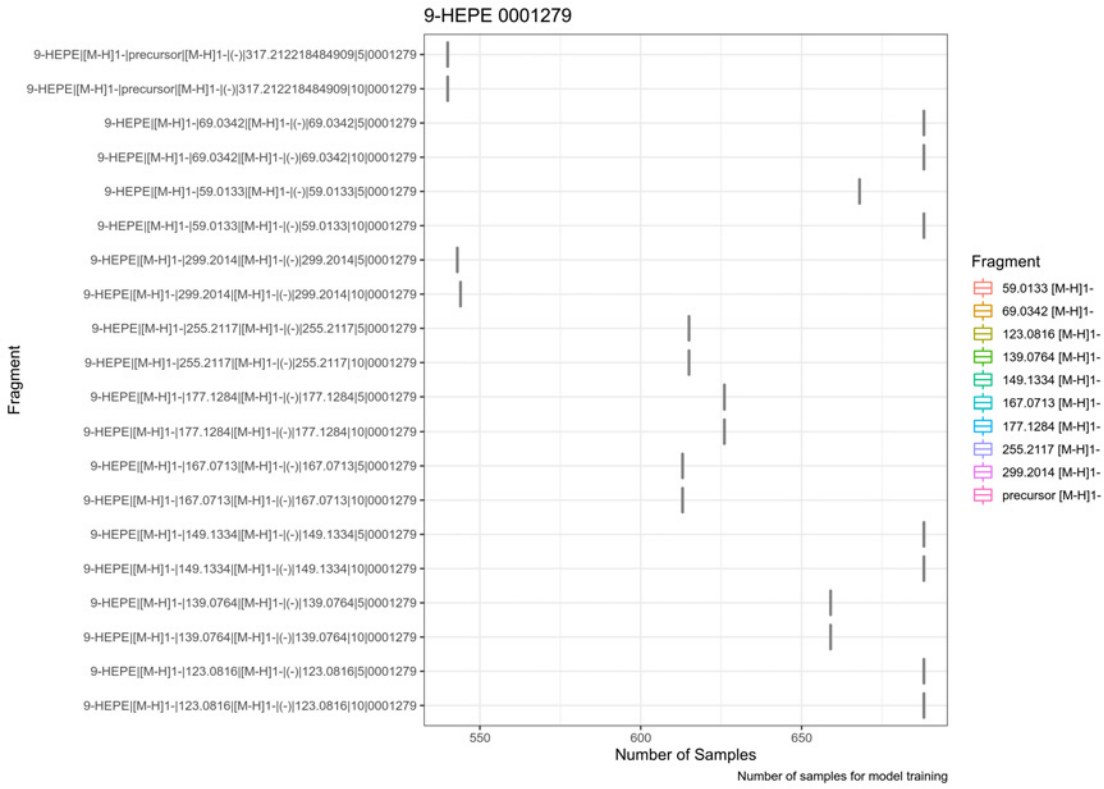

Figure 165. Number of samples used for training per combination Id

# 1.34. 9-HETE [M-H]1- 0001291

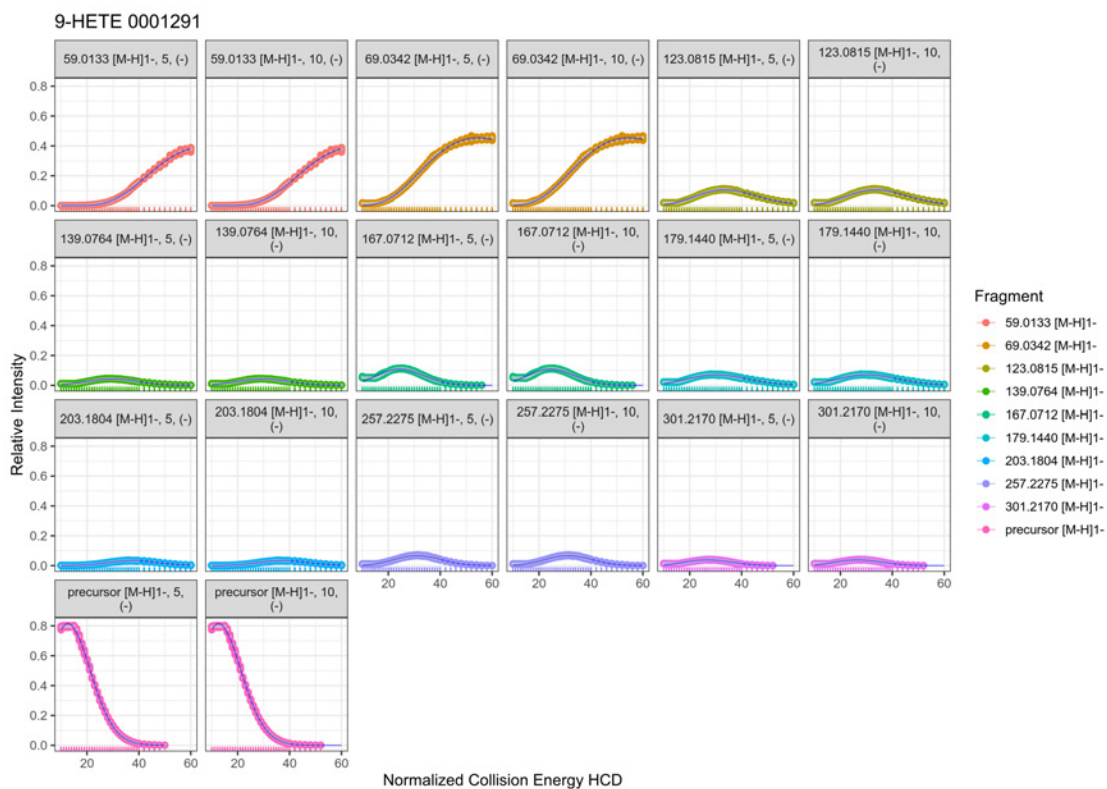

Figure 166. Nonlinear fit

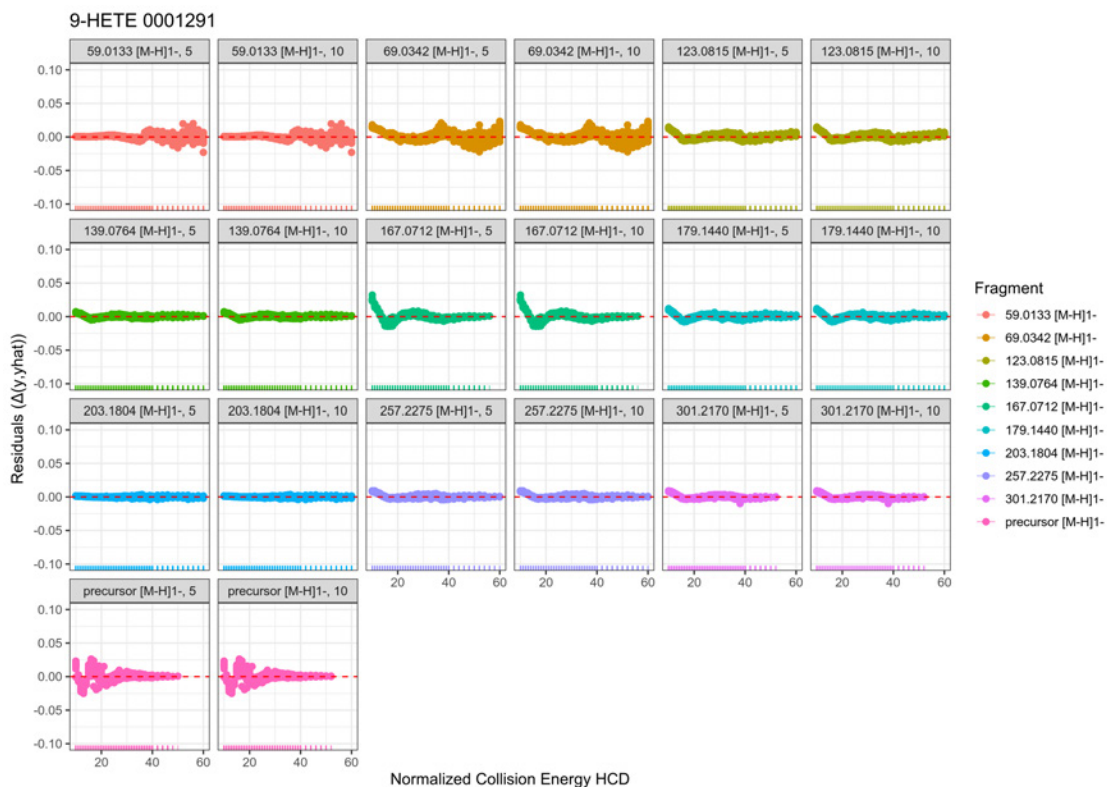

Figure 167. Residuals of nonlinear fit

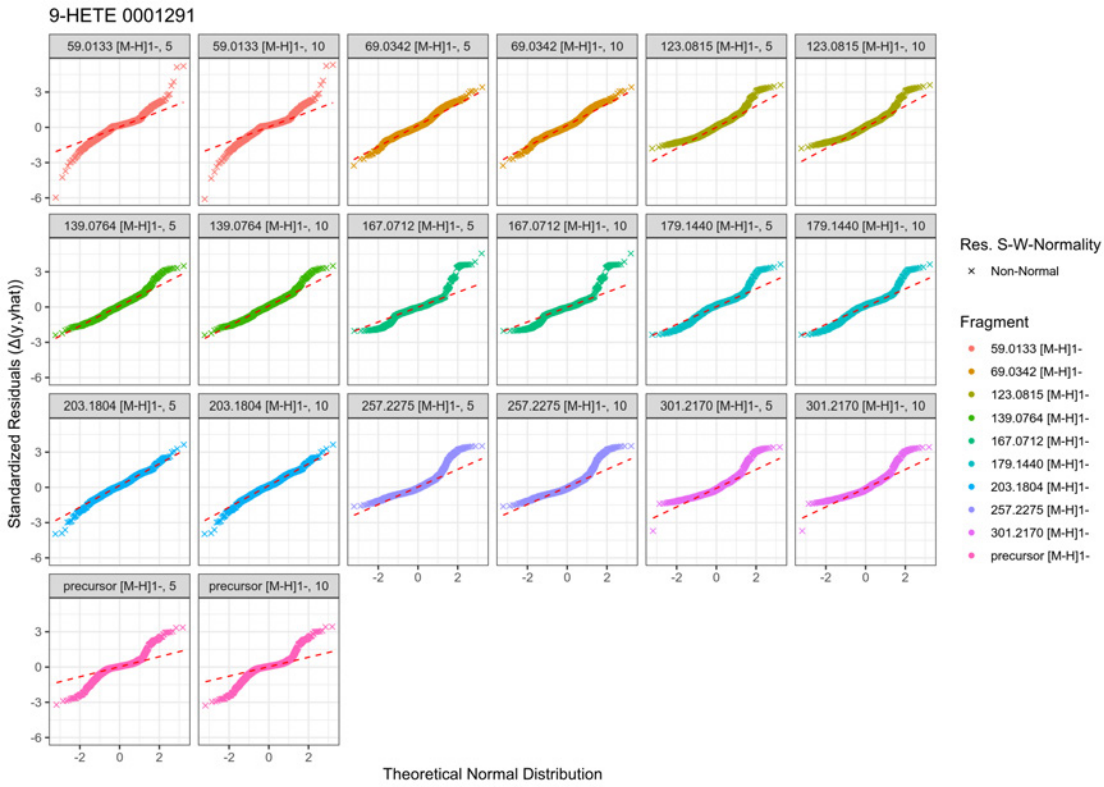

Figure 168. Quantile-quantile plot of residuals

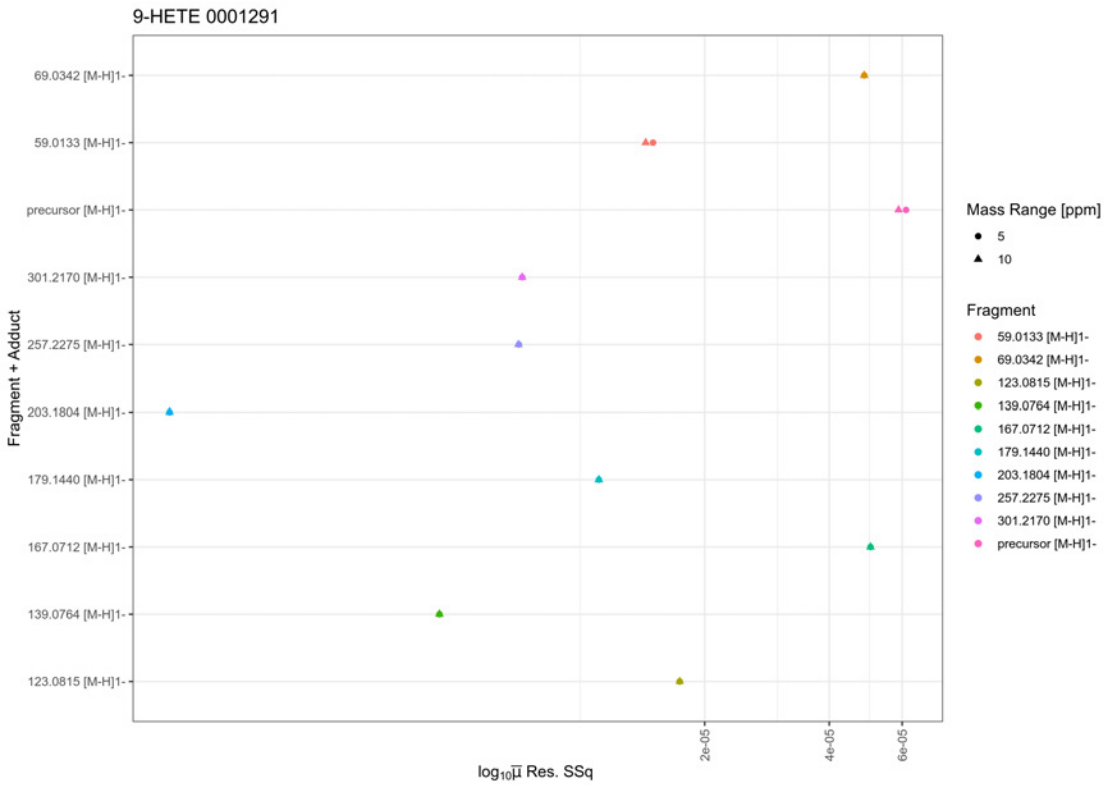

Figure 169. Normalized sum-of-squares of the residuals

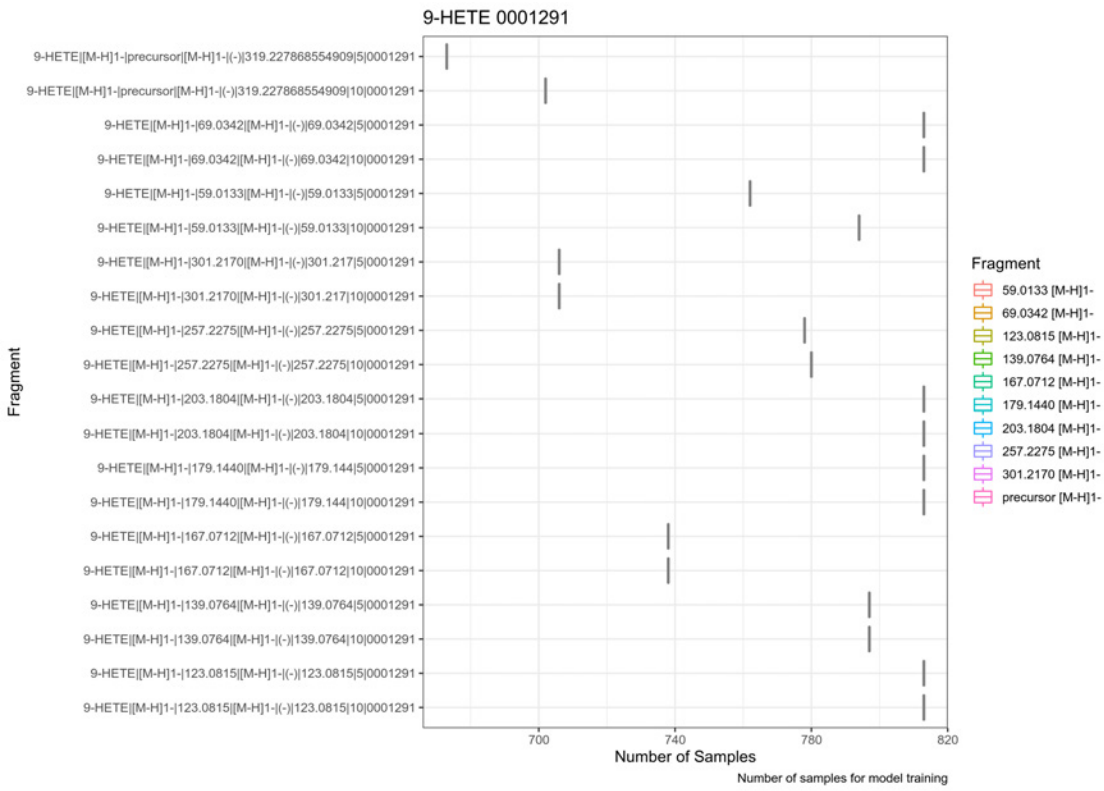

Figure 170. Number of samples used for training per combination Id

# 1.35. 9-HODE [M-H]1- 0001339

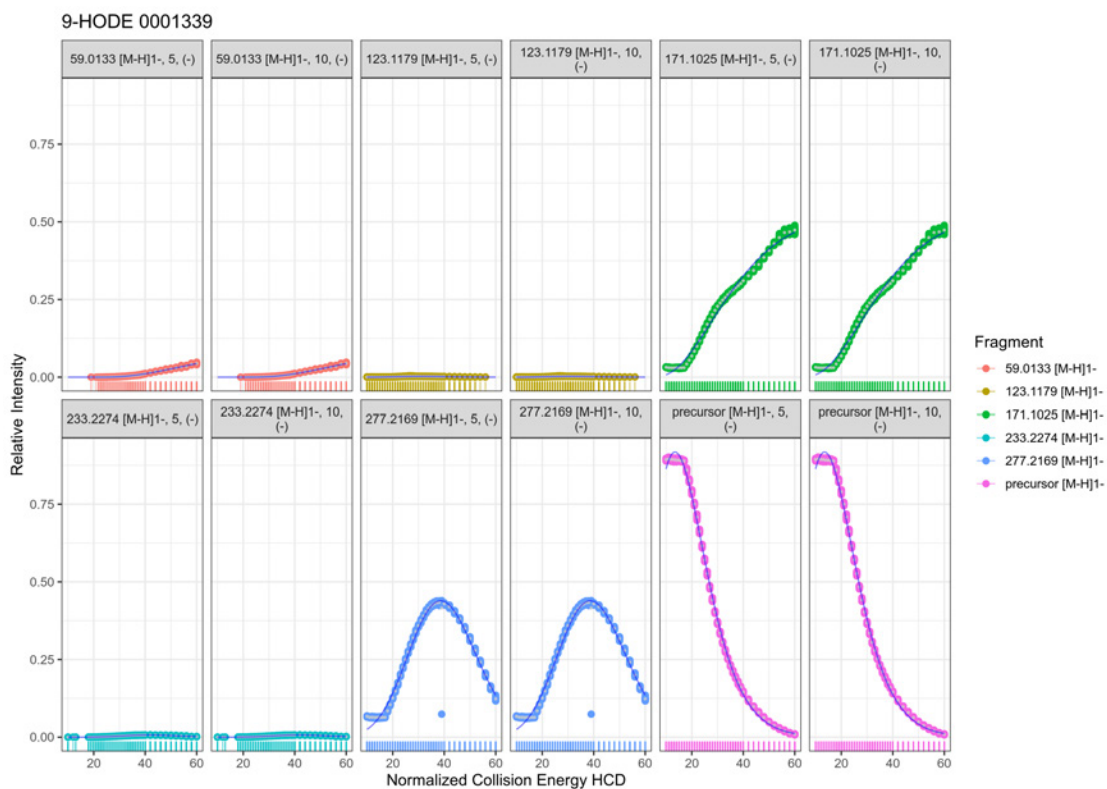

Figure 171. Nonlinear fit

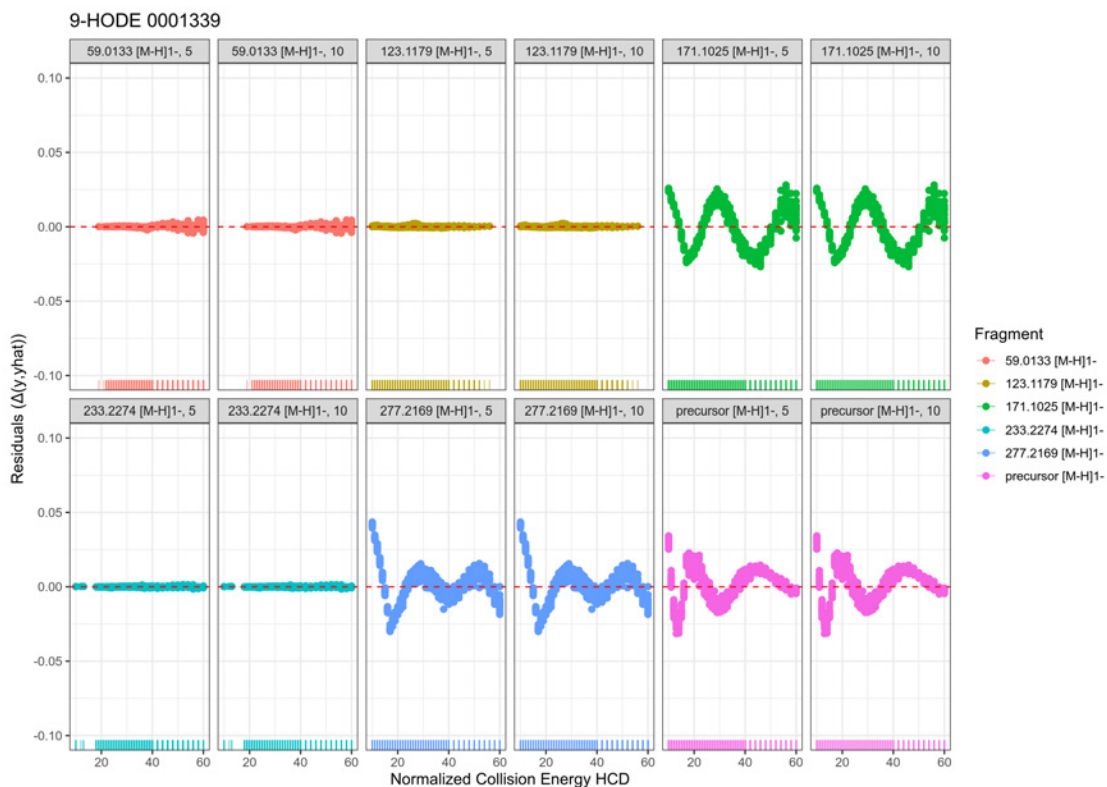

Figure 172. Residuals of nonlinear fit

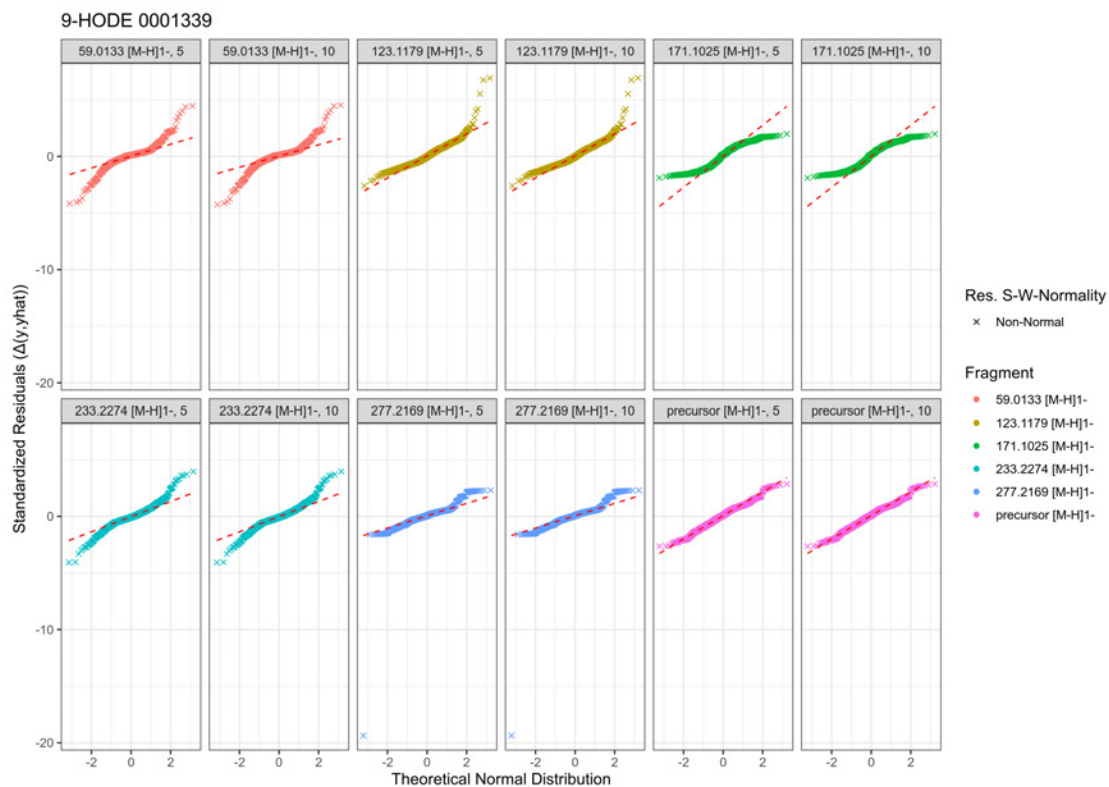

Figure 173. Quantile-quantile plot of residuals

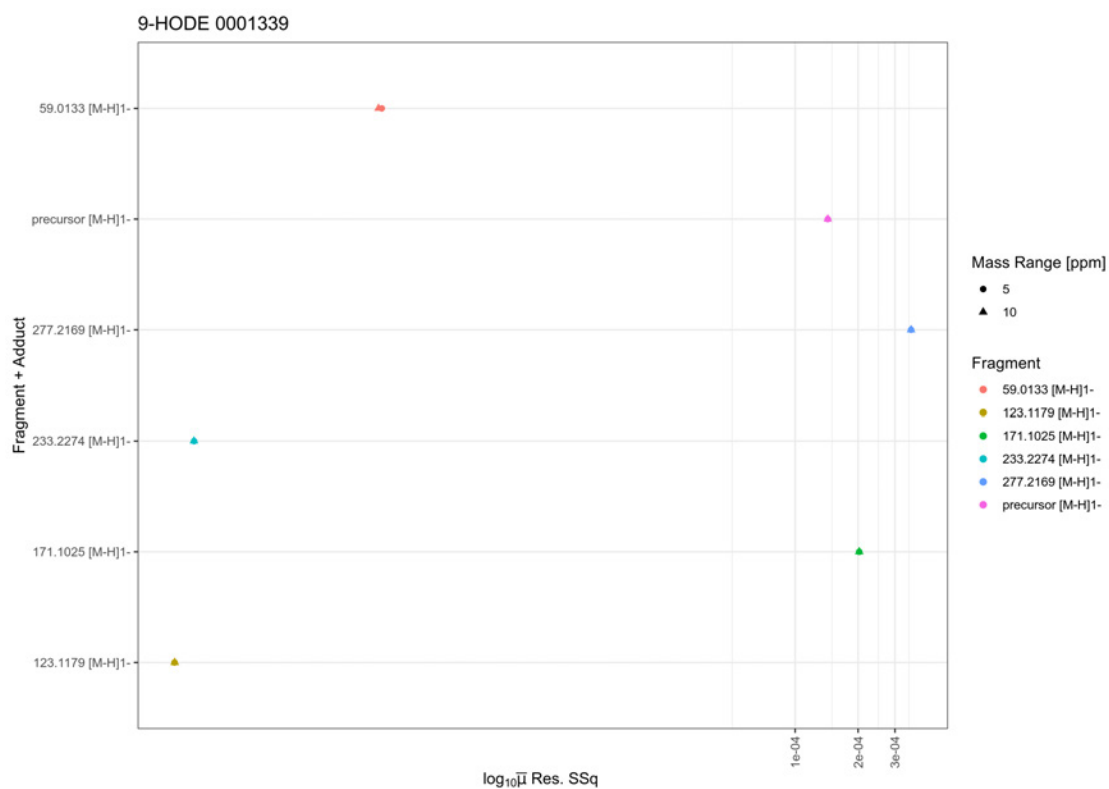

Figure 174. Normalized sum-of-squares of the residuals



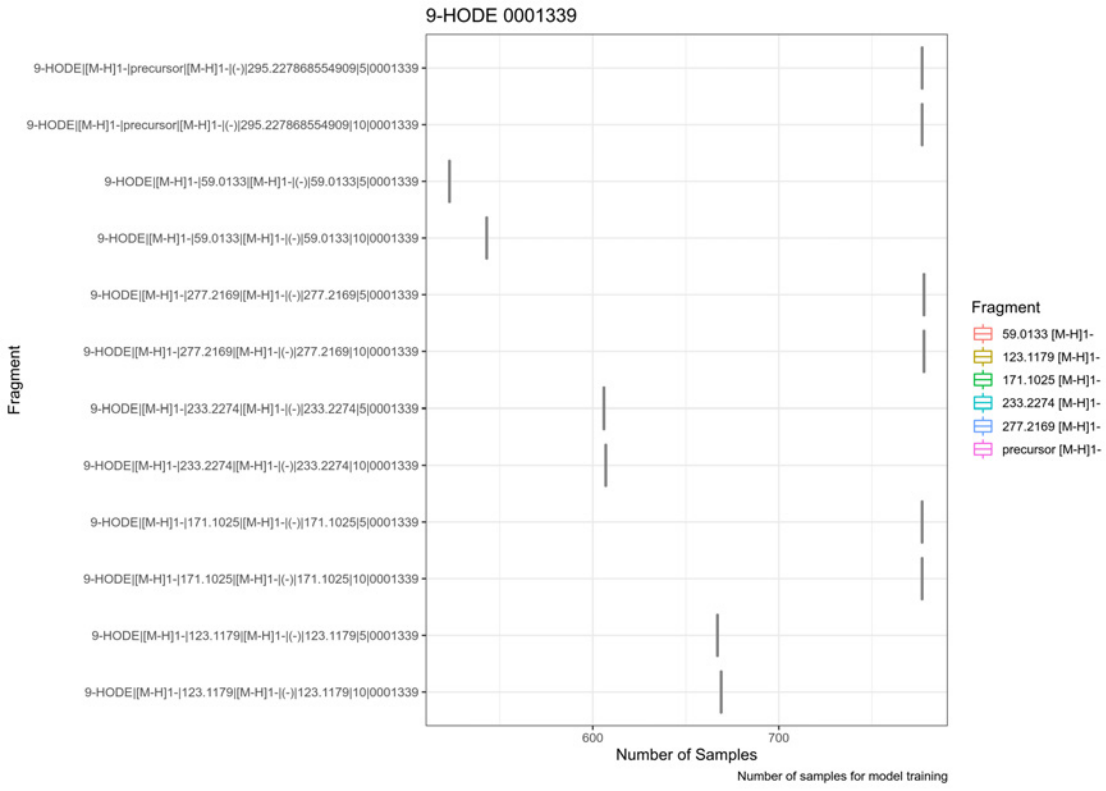

Figure 175. Number of samples used for training per combination Id

# 1.36. 9-HOTrE [M-H]1- 0000137

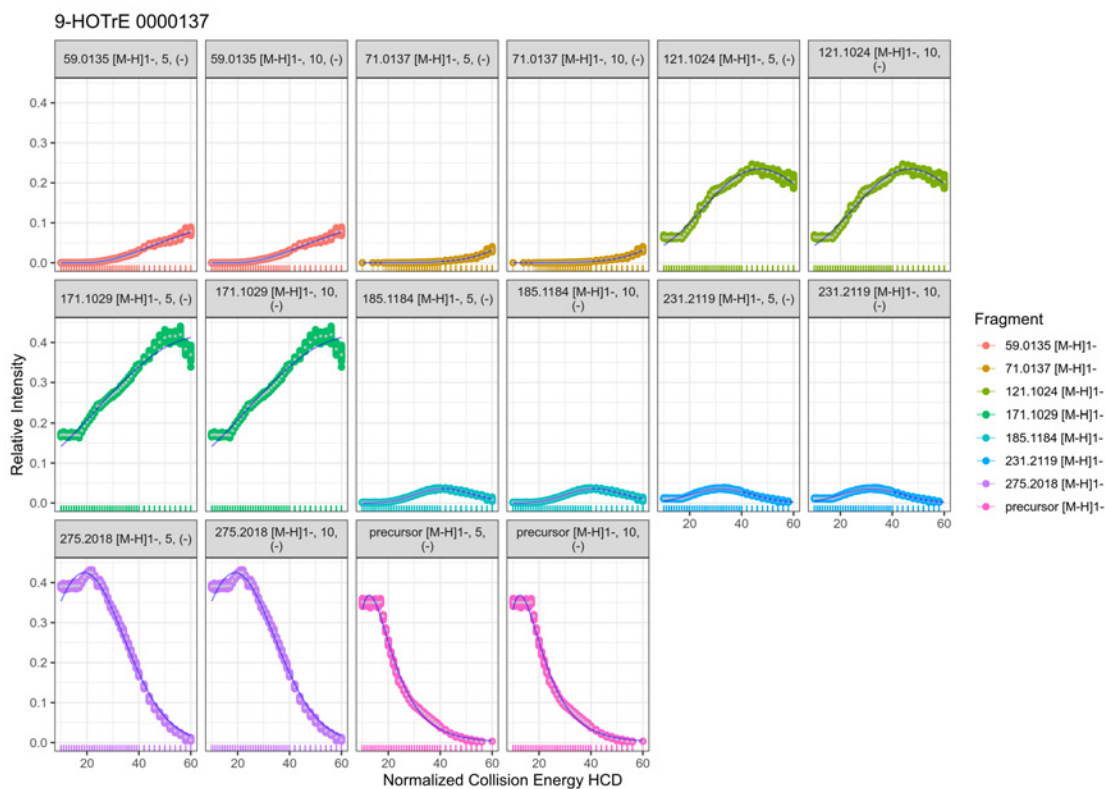

Figure 176. Nonlinear fit

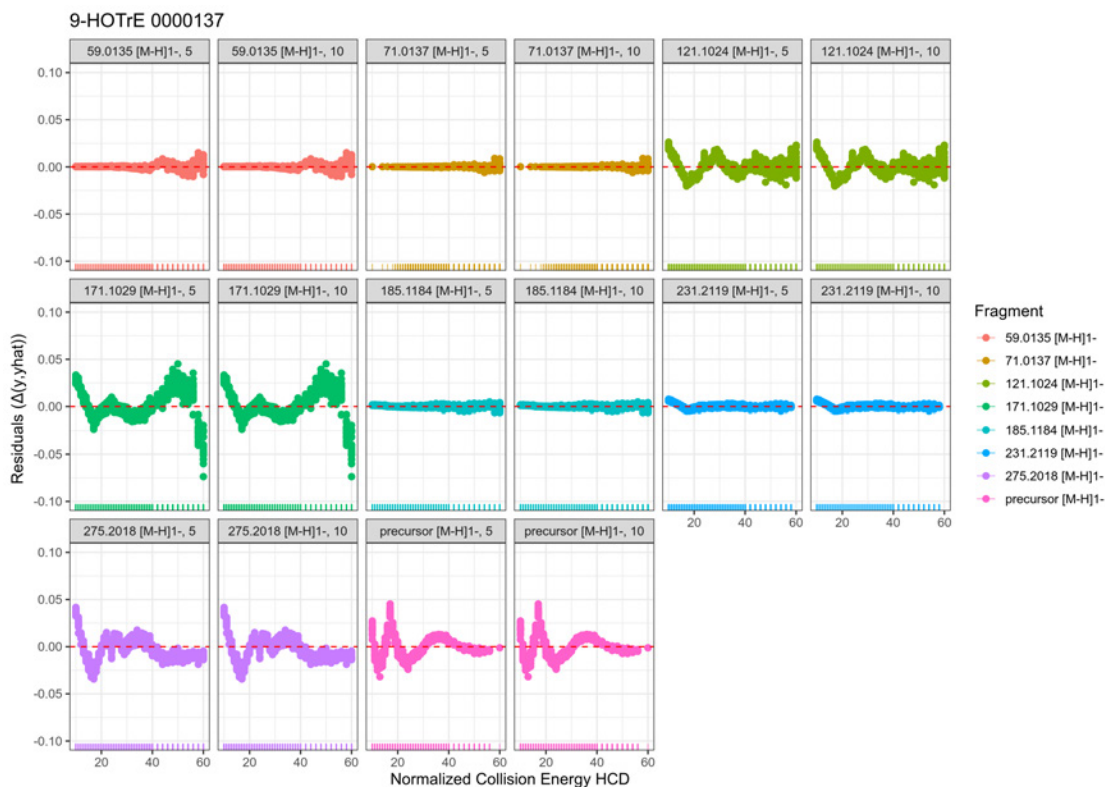

Figure 177. Residuals of nonlinear fit

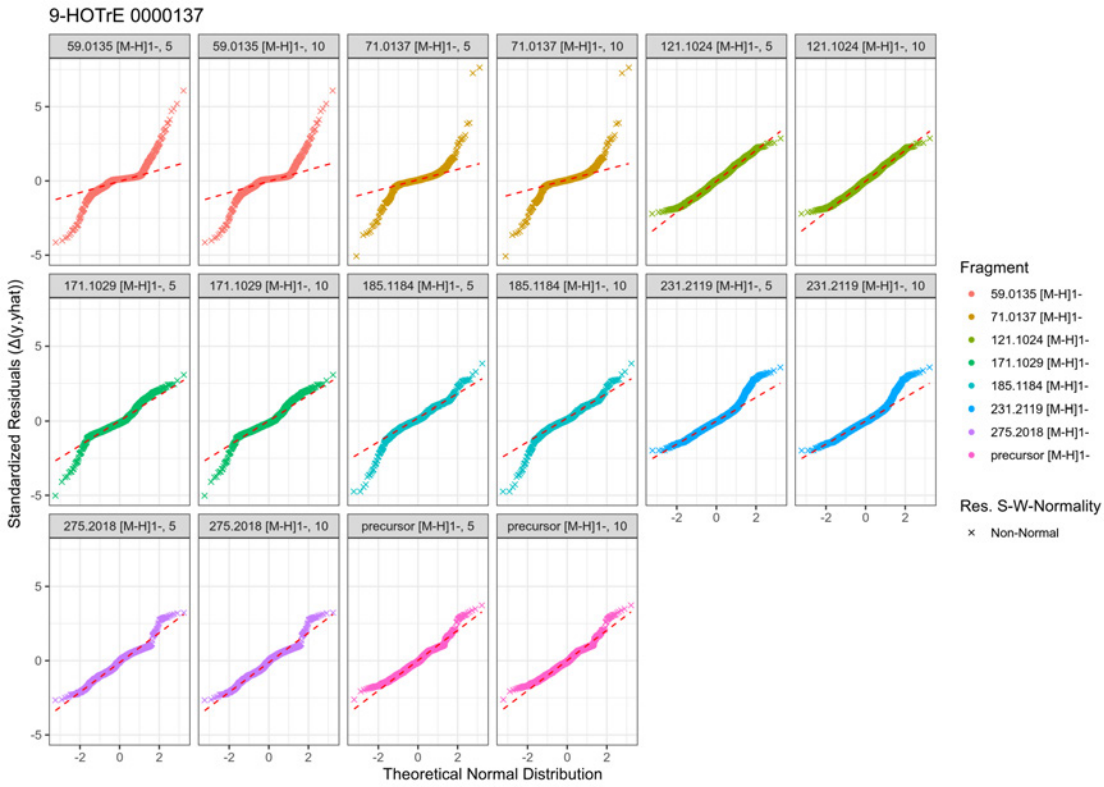

Figure 178. Quantile-quantile plot of residuals

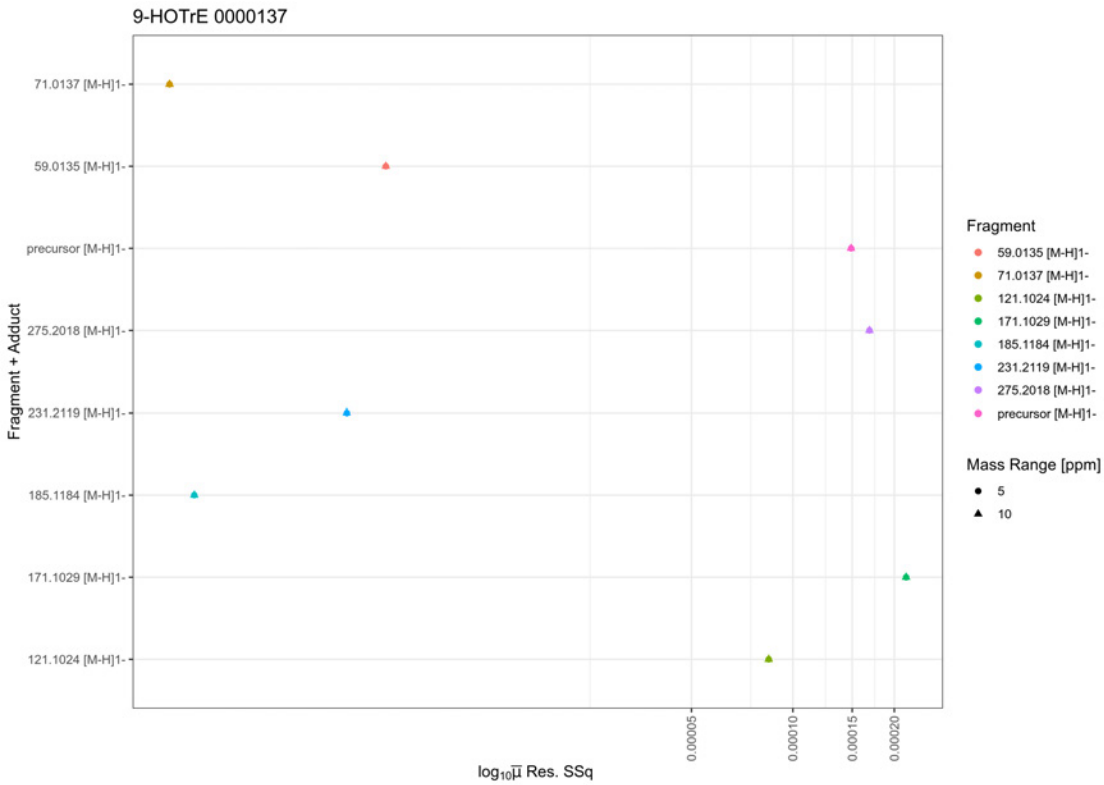

Figure 179. Normalized sum-of-squares of the residuals

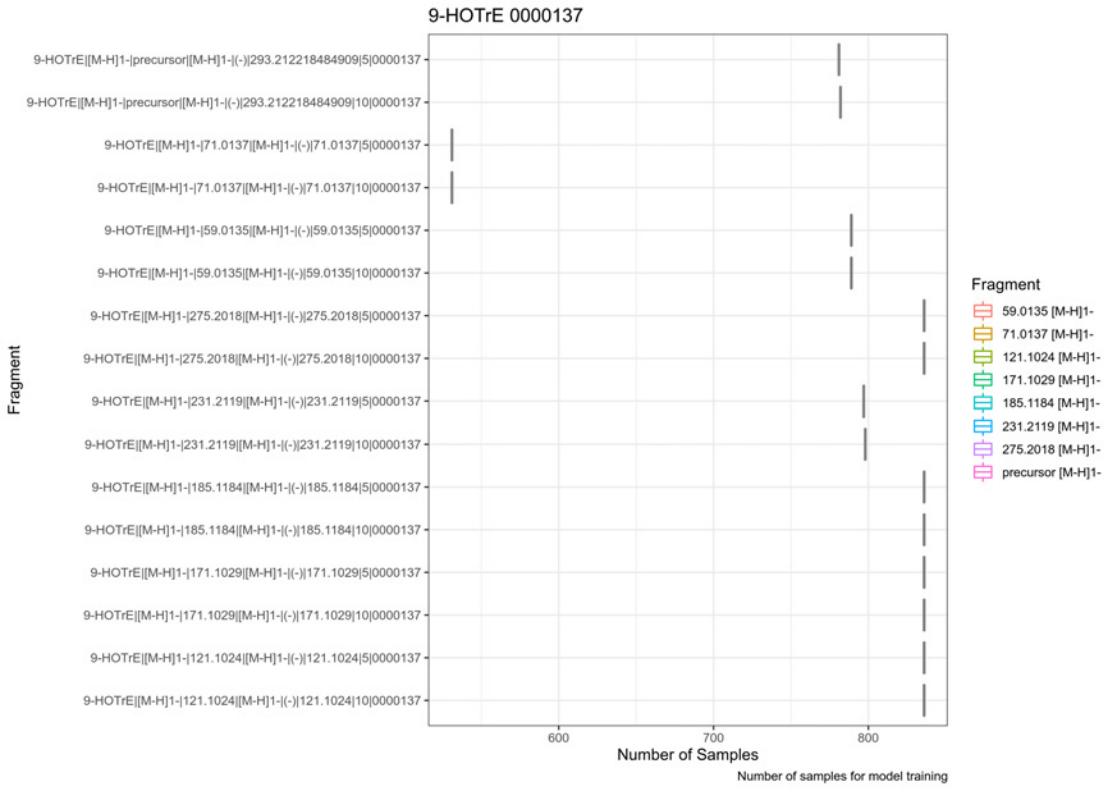

Figure 180. Number of samples used for training per combination Id

# 1.37. AA{d8} [M-H]1- 0001337

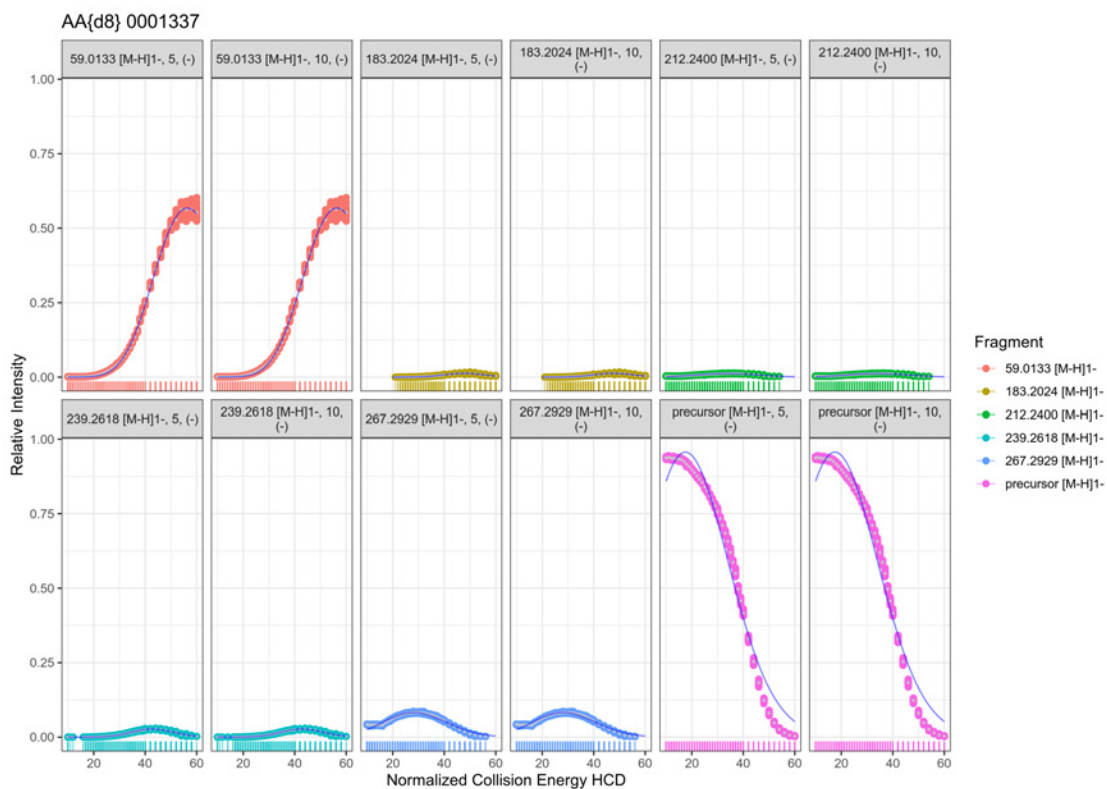

Figure 181. Nonlinear fit

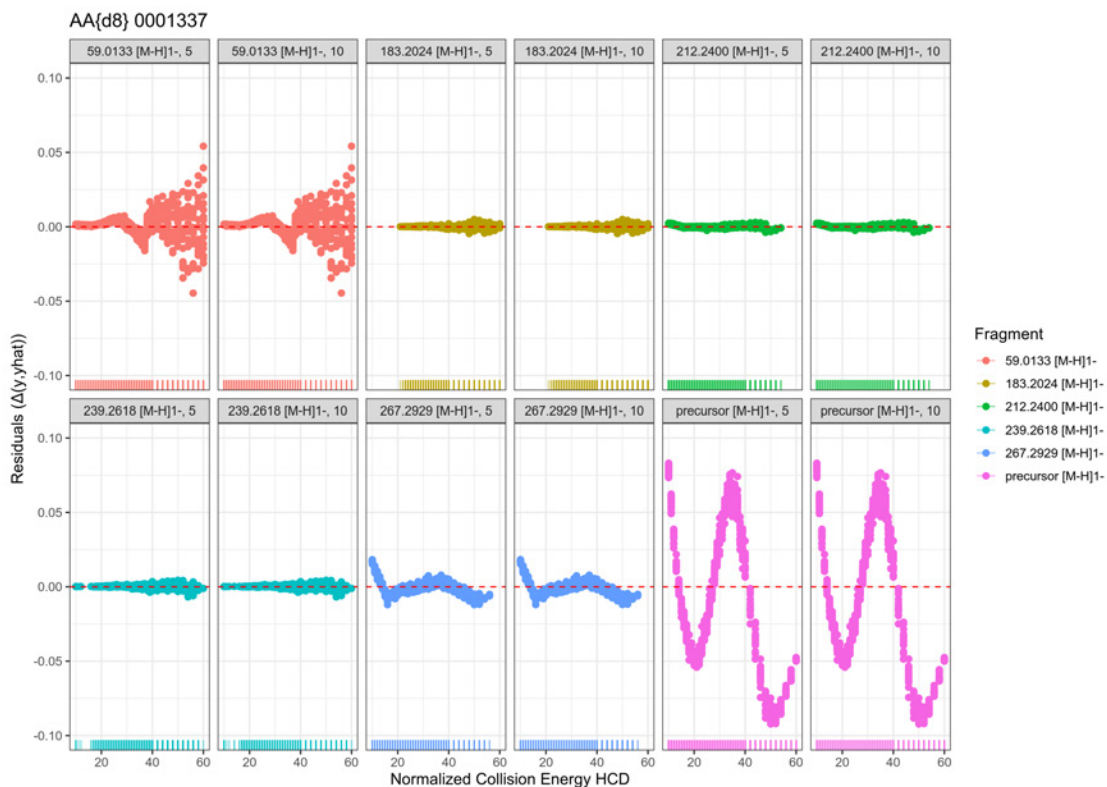

Figure 182. Residuals of nonlinear fit

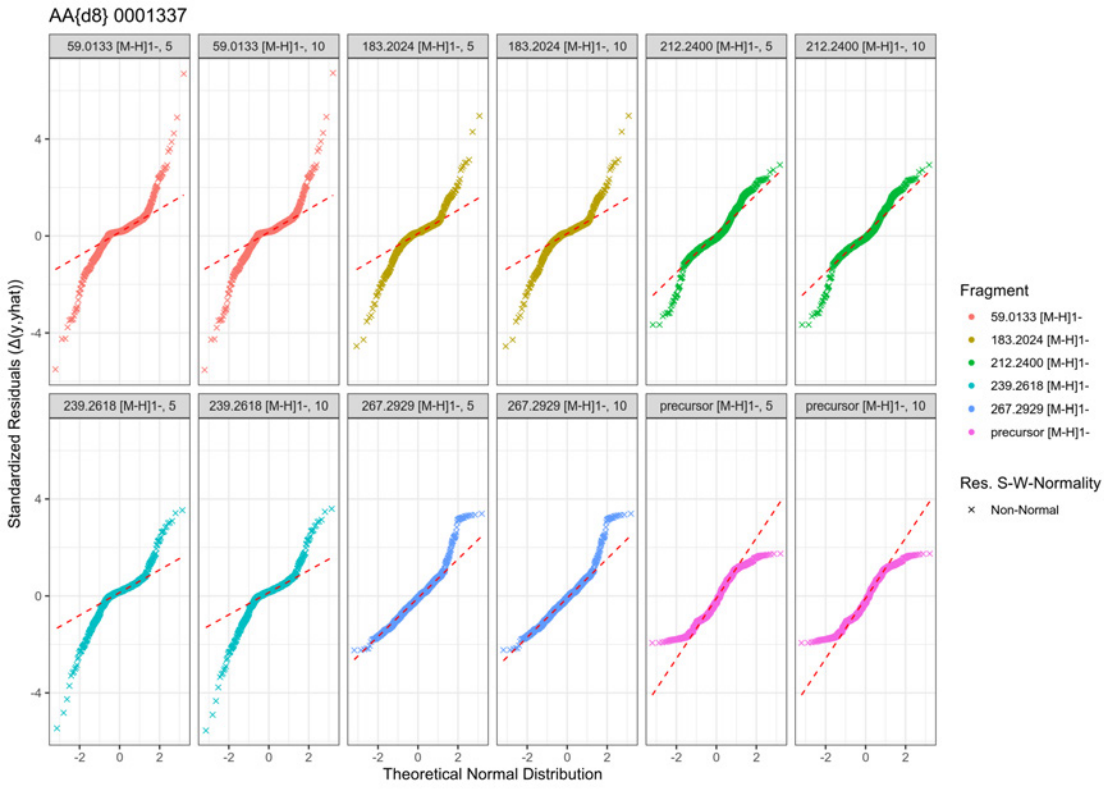

Figure 183. Quantile-quantile plot of residuals

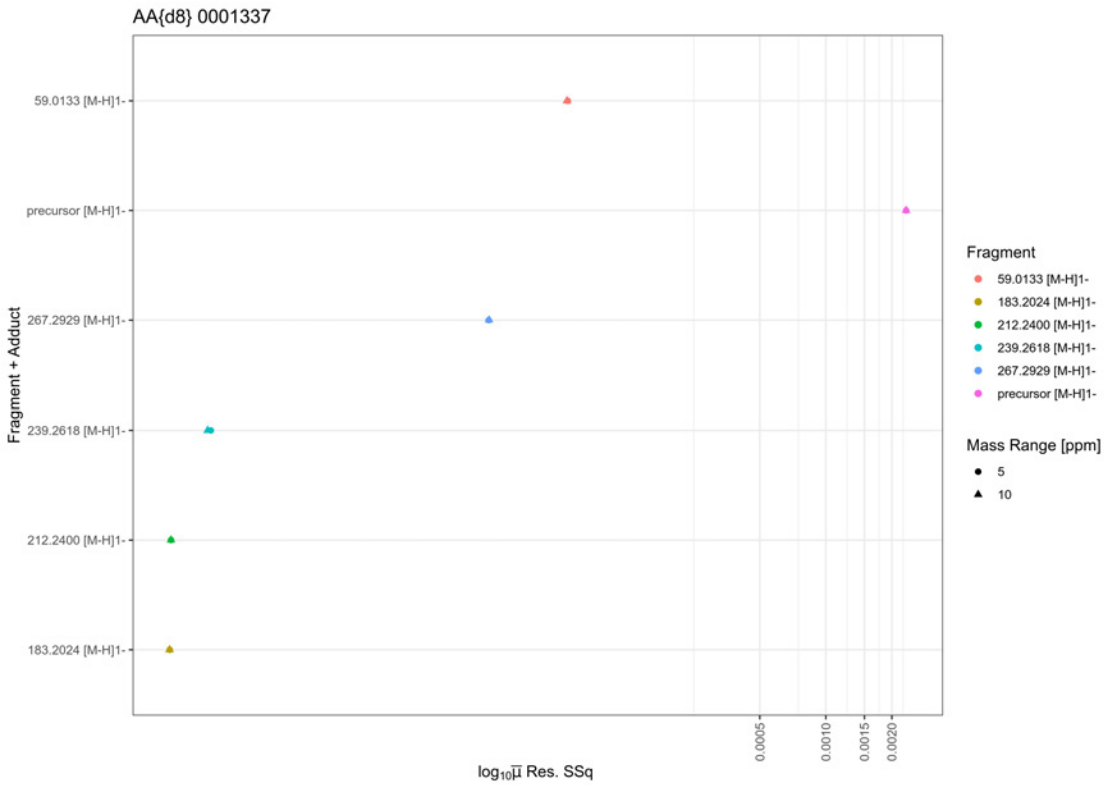

Figure 184. Normalized sum-of-squares of the residuals



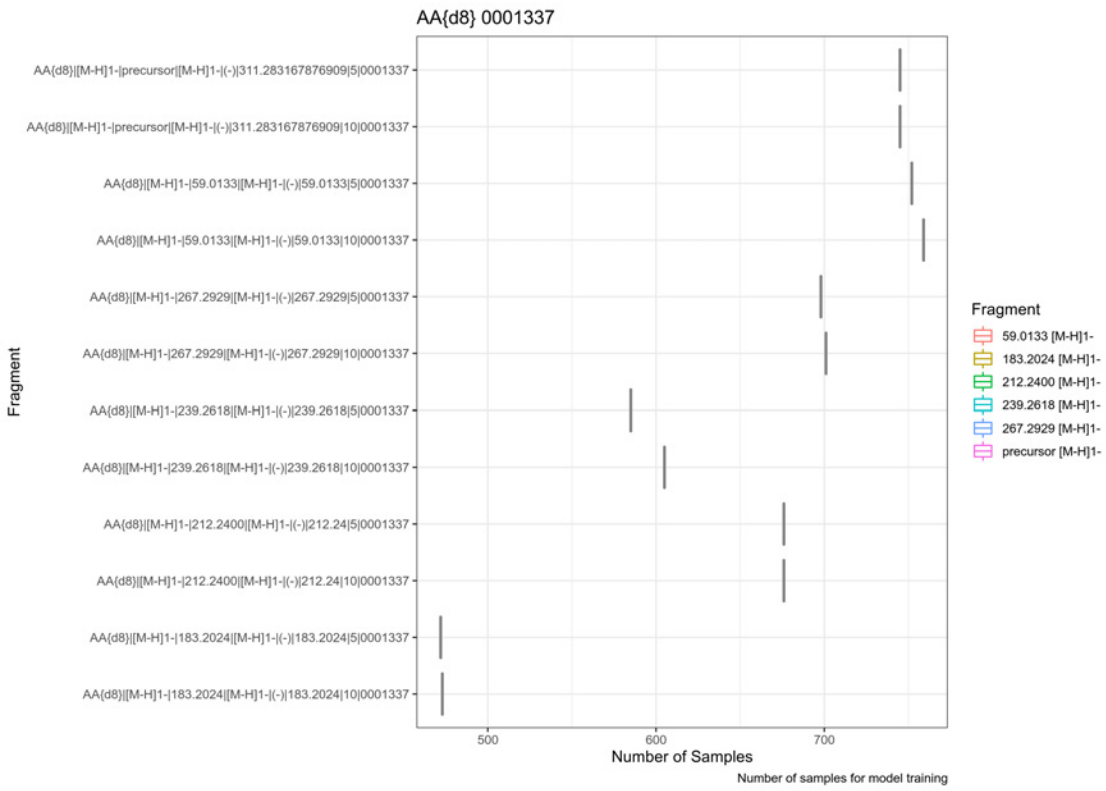

Figure 185. Number of samples used for training per combination Id

# 1.38. DHA{d5} [M-H]1- 0001353

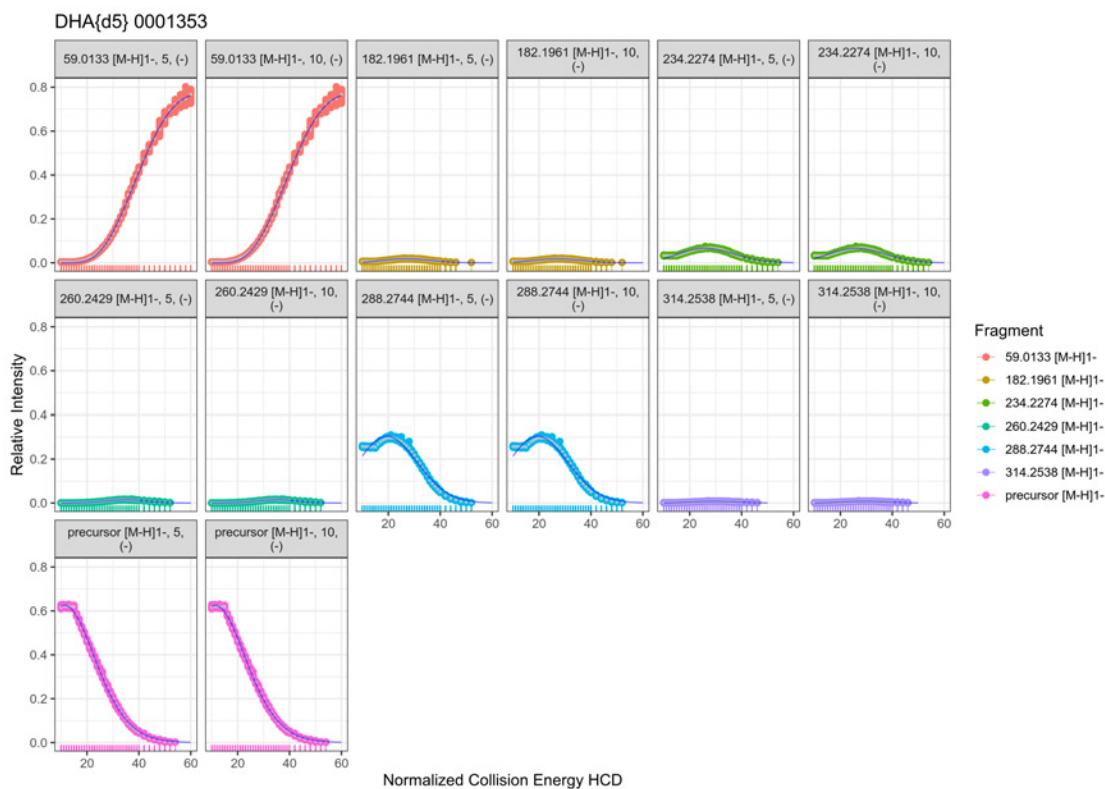

Figure 186. Nonlinear fit

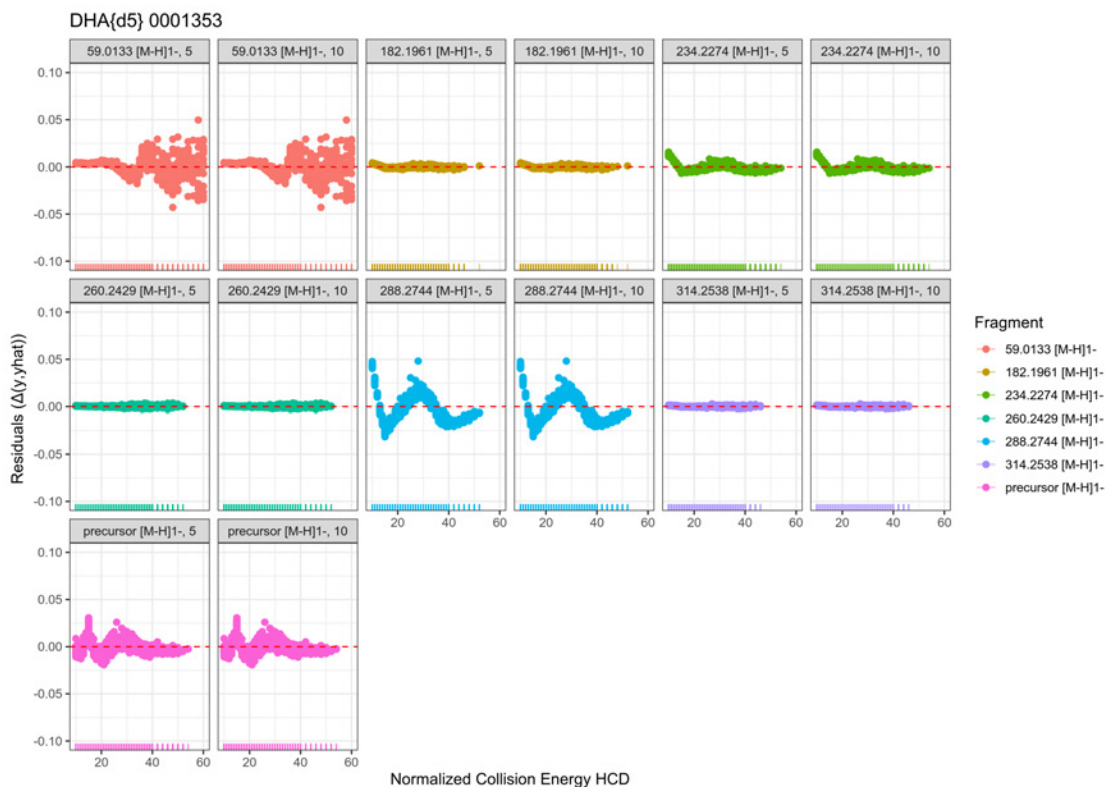

Figure 187. Residuals of nonlinear fit

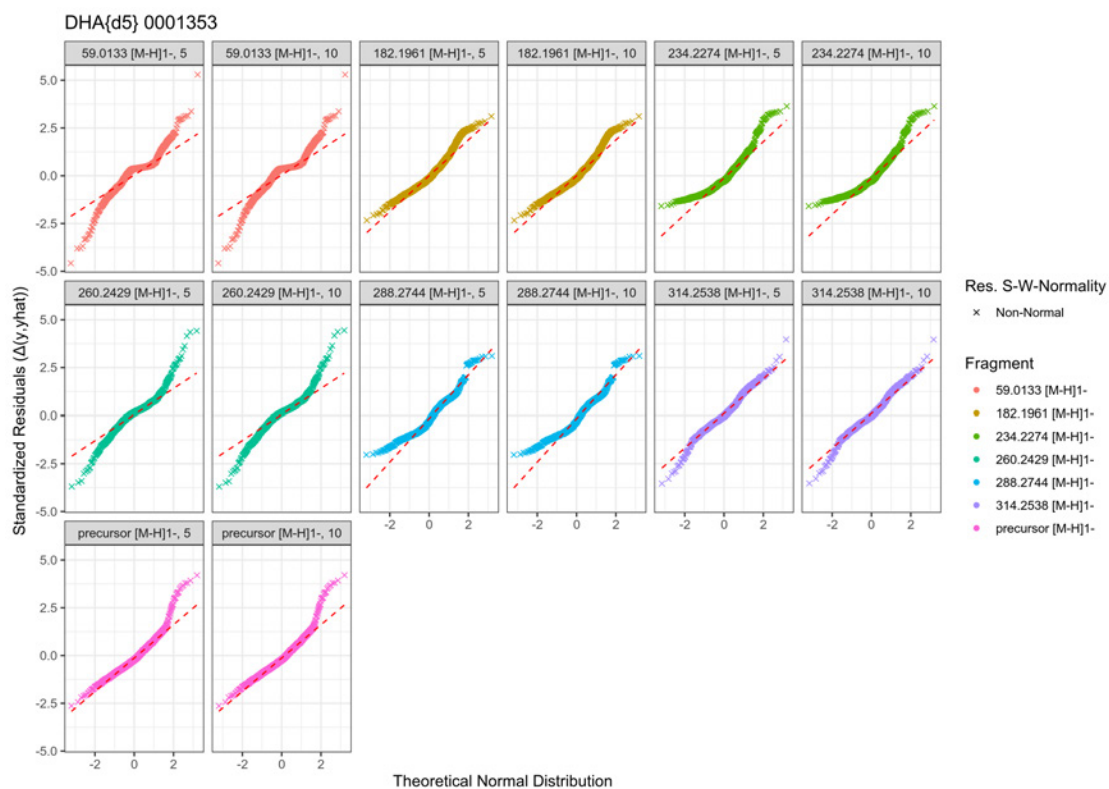

Figure 188. Quantile-quantile plot of residuals

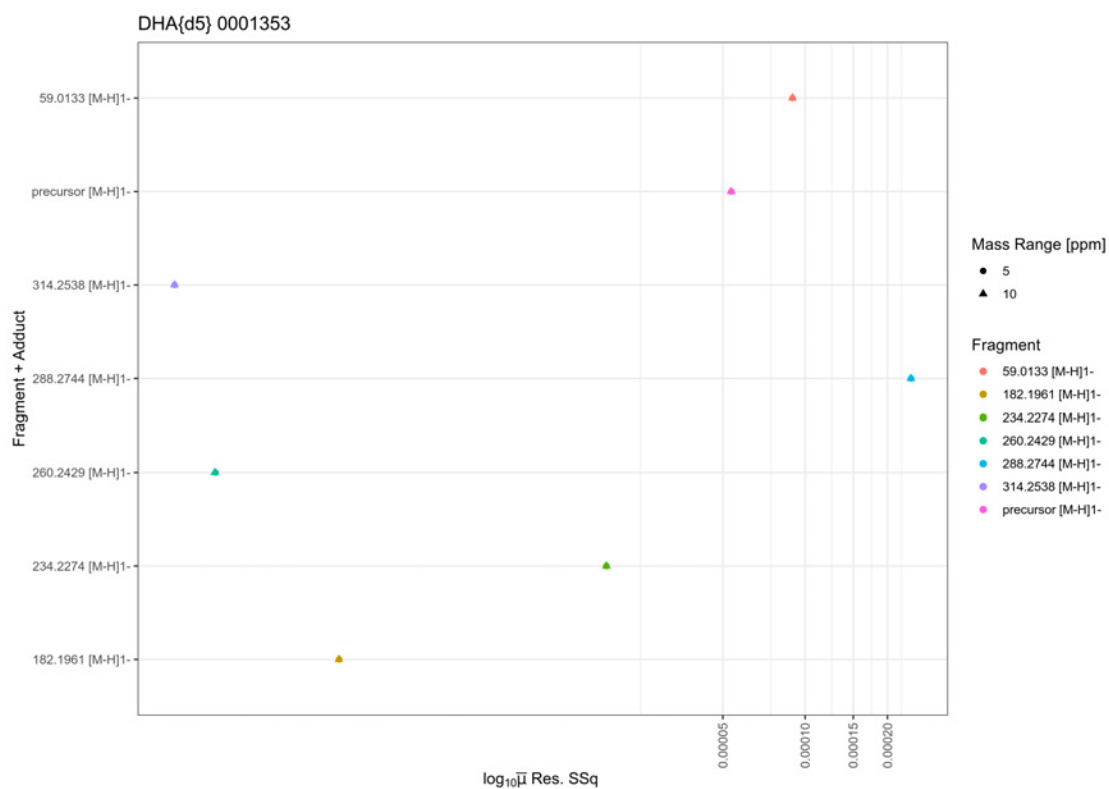

Figure 189. Normalized sum-of-squares of the residuals

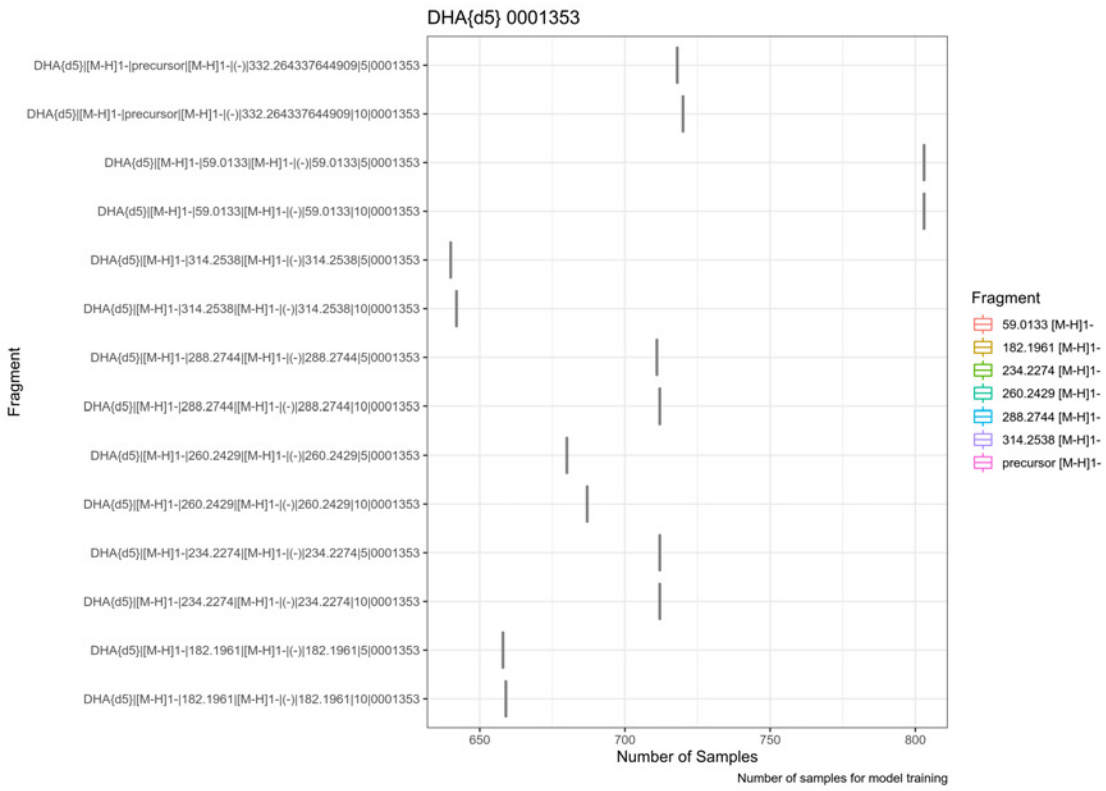

Figure 190. Number of samples used for training per combination Id

# 1.39. EPA{d5} [M-H]1- 0001335

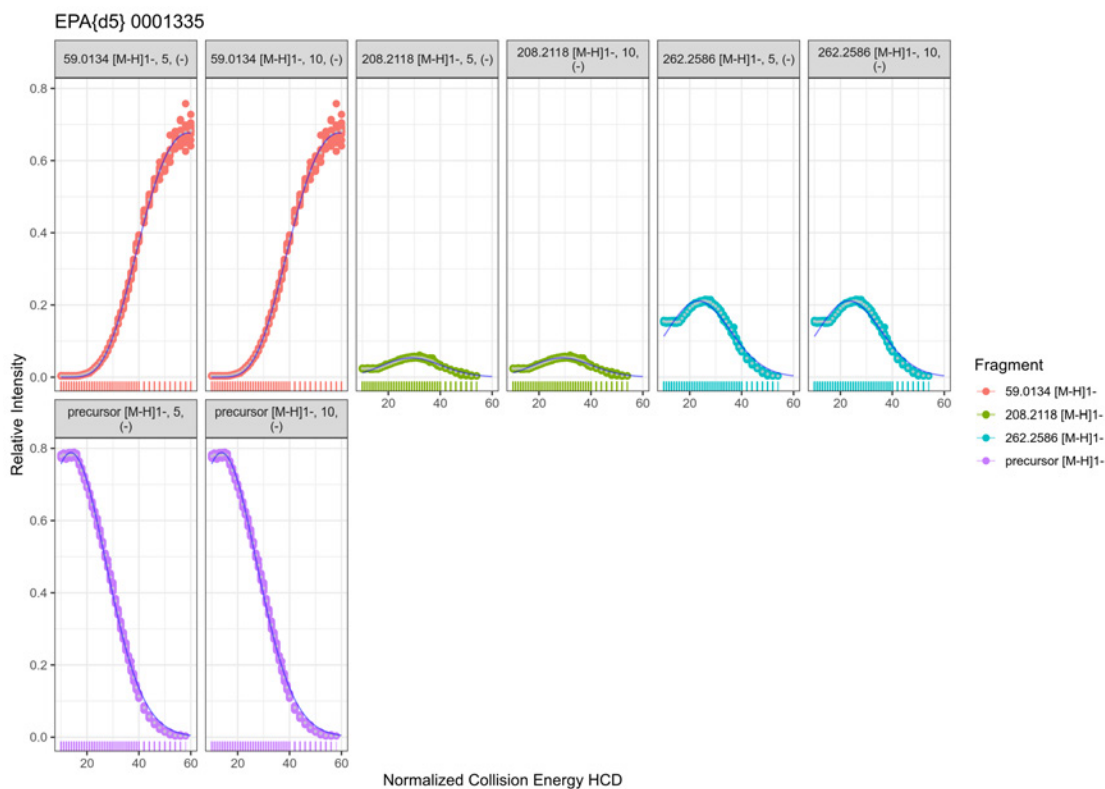

Figure 191. Nonlinear fit

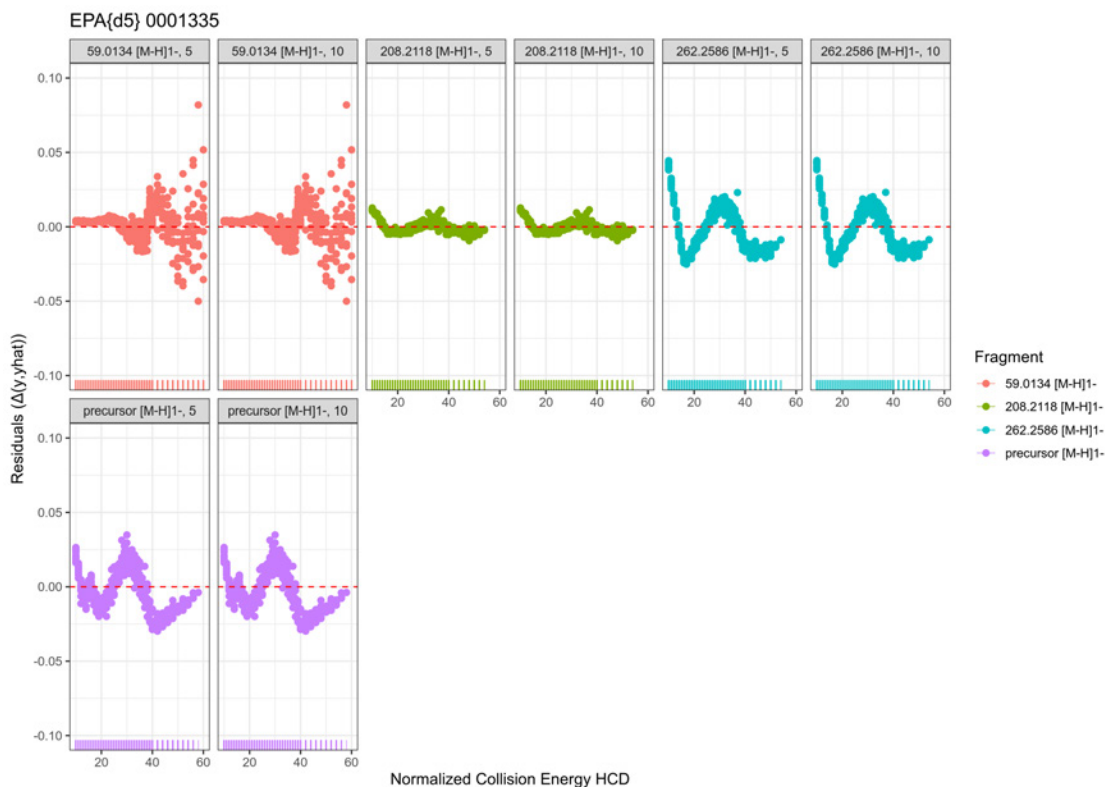

Figure 192. Residuals of nonlinear fit

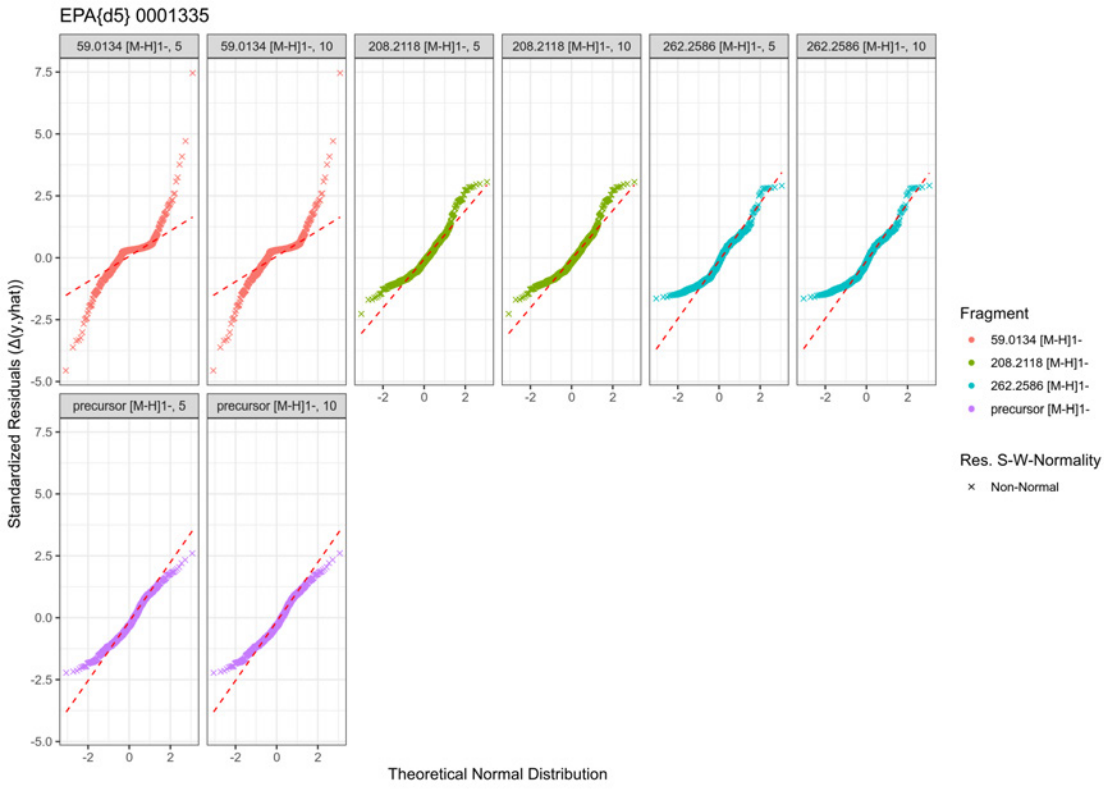

Figure 193. Quantile-quantile plot of residuals

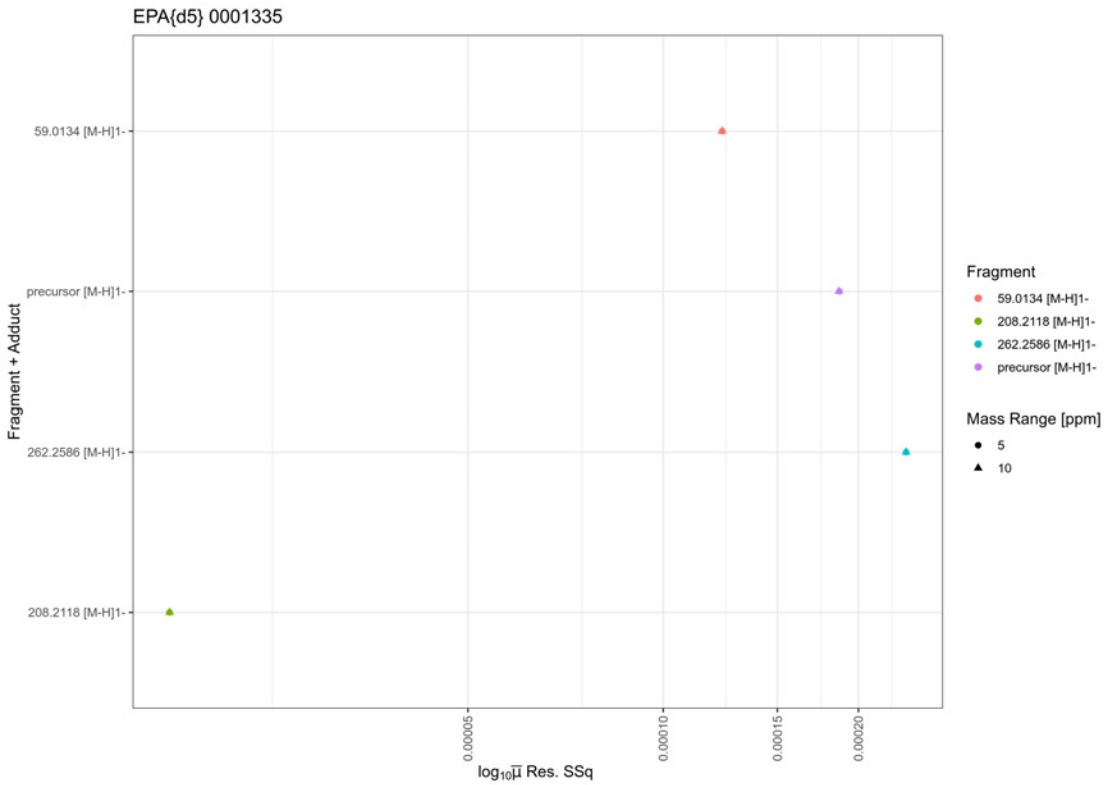

Figure 194. Normalized sum-of-squares of the residuals



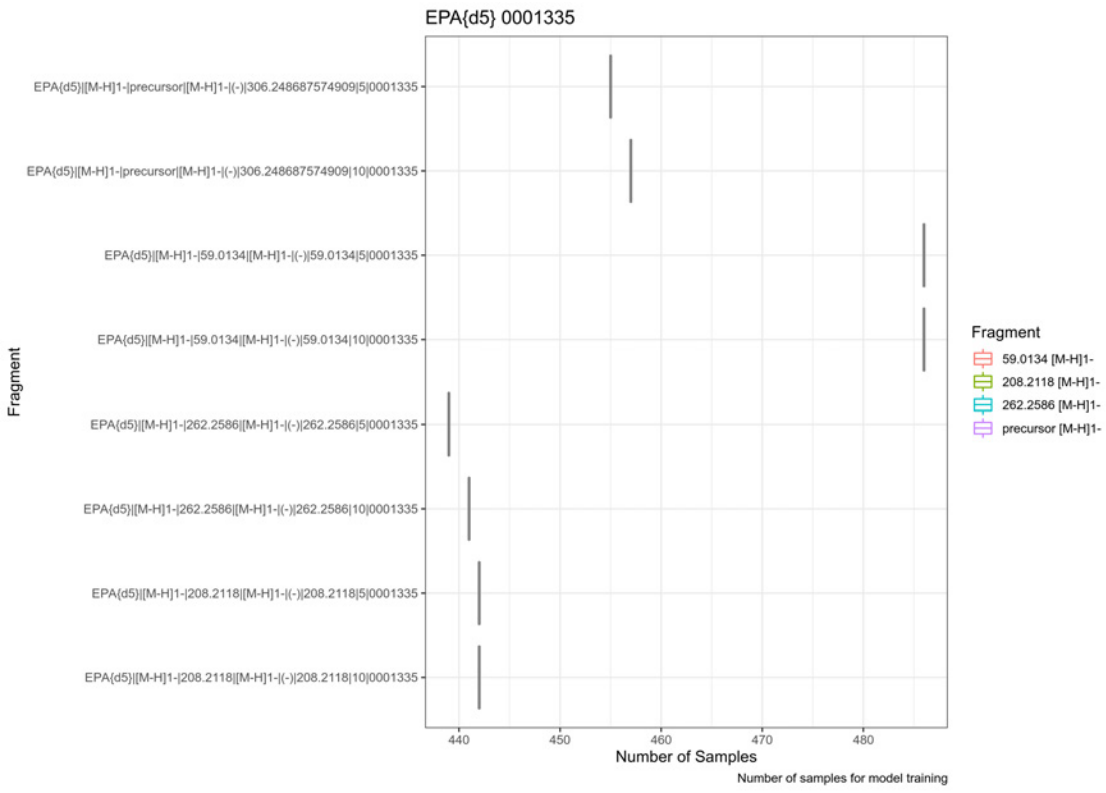

Figure 195. Number of samples used for training per combination Id

# 1.40. LTB4{d4} [M-H]1- 0001331

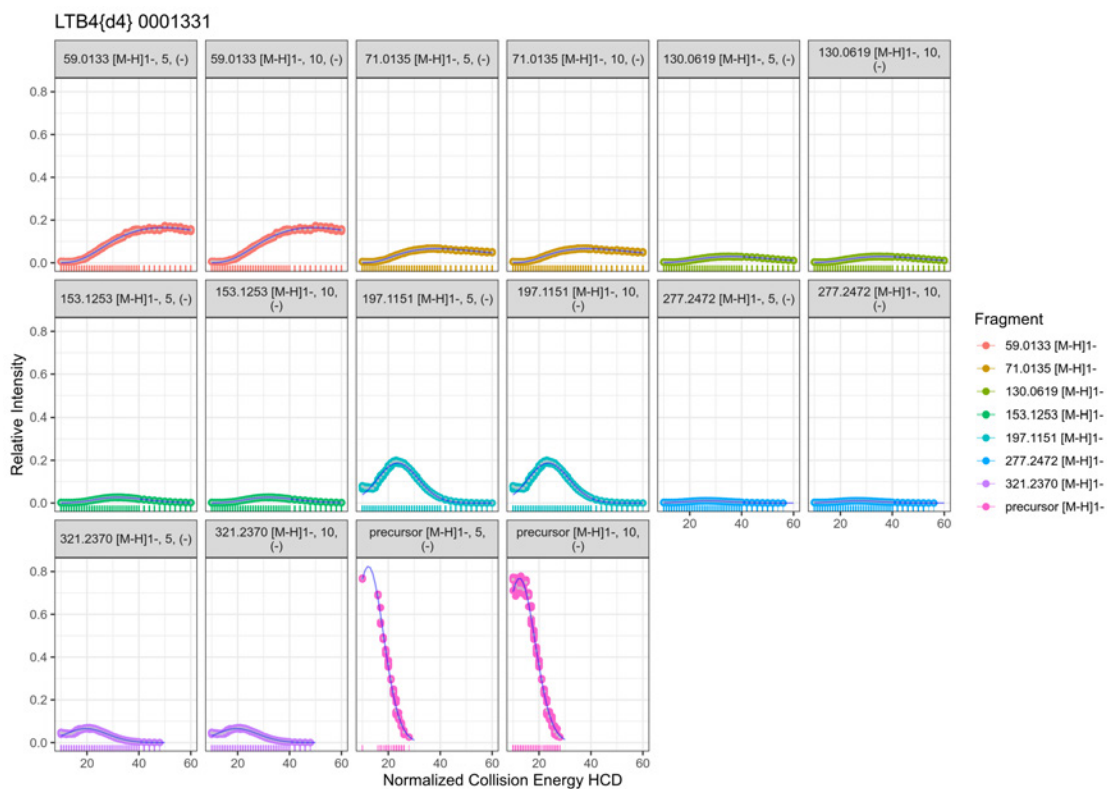

Figure 196. Nonlinear fit

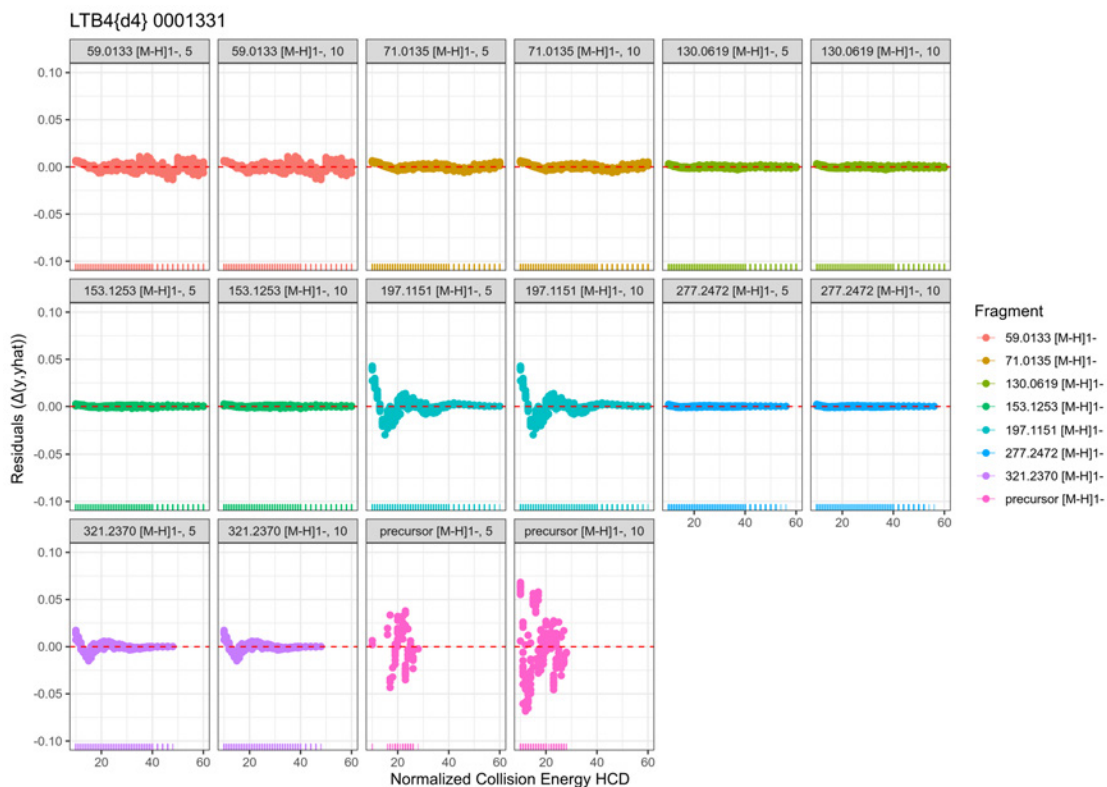

Figure 197. Residuals of nonlinear fit

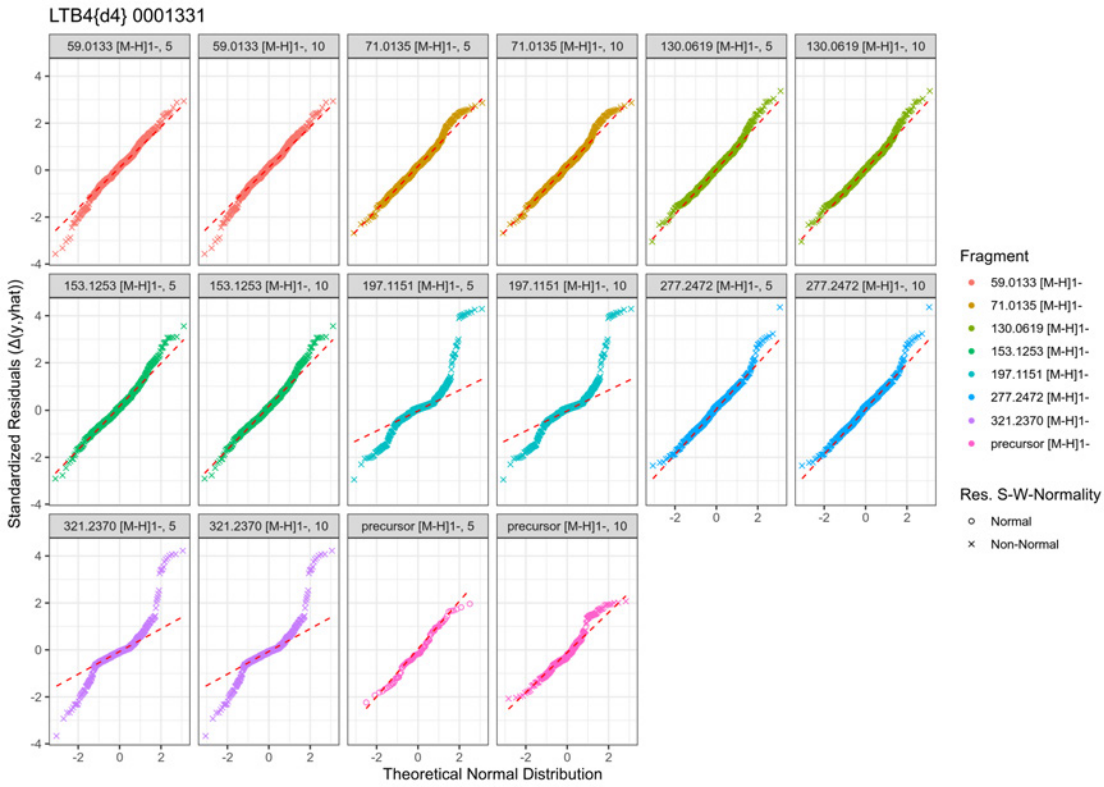

Figure 198. Quantile-quantile plot of residuals

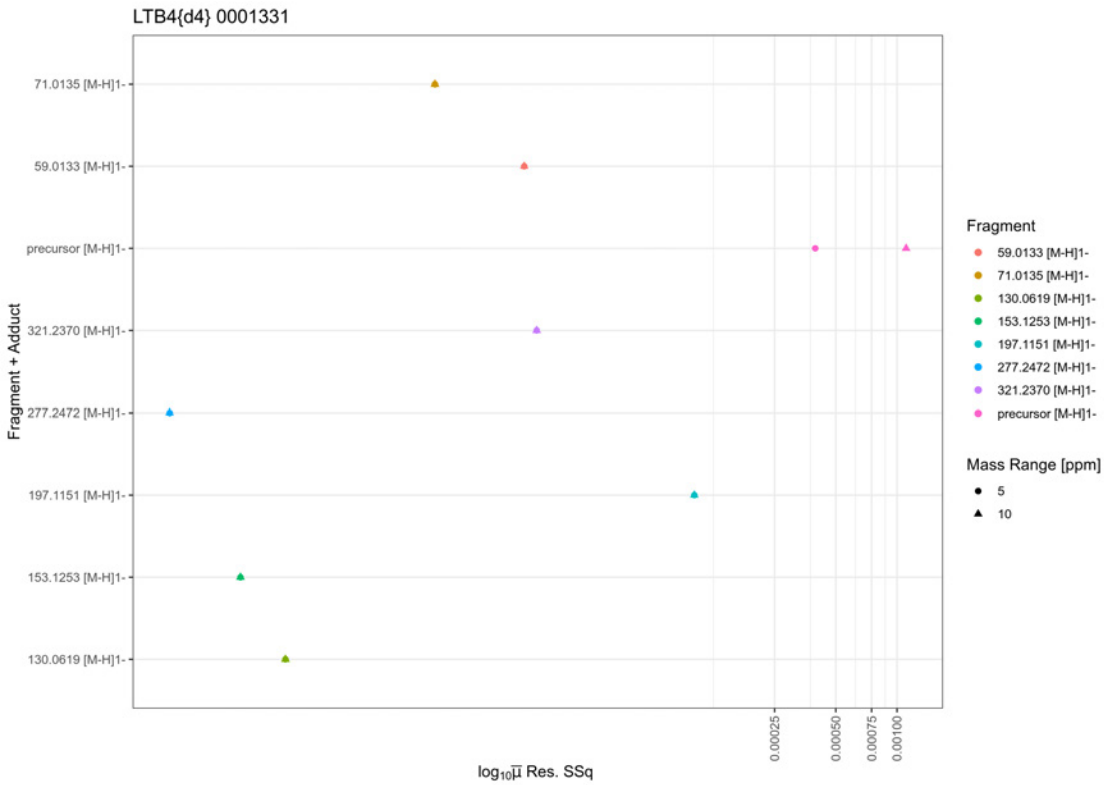

Figure 199. Normalized sum-of-squares of the residuals

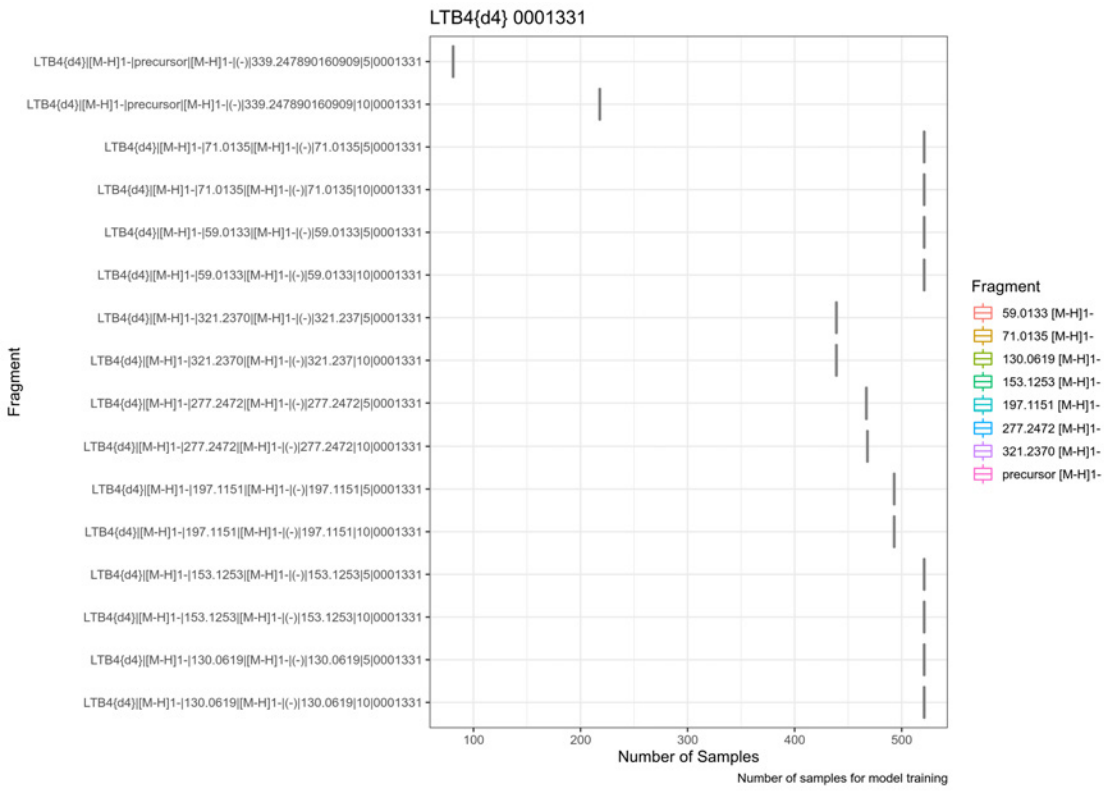

Figure 200. Number of samples used for training per combination Id

# 1.41. LTC4{d5} [M-H]1- 0000163

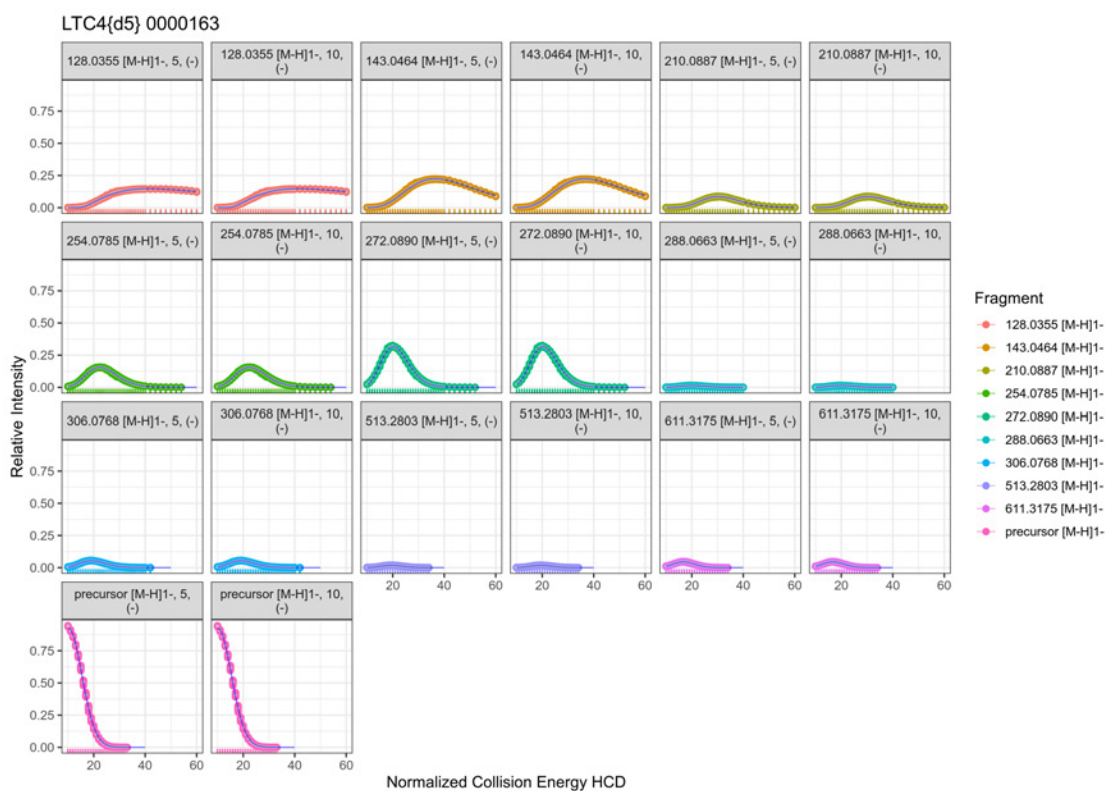

Figure 201. Nonlinear fit

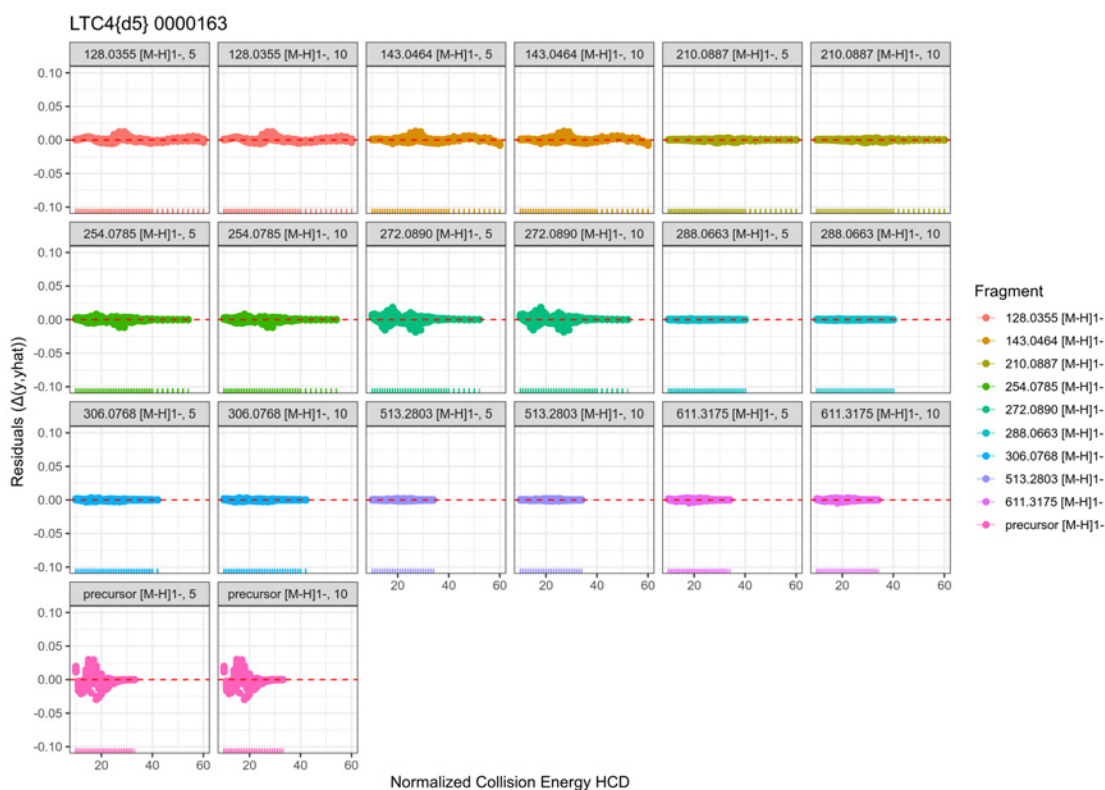

Figure 202. Residuals of nonlinear fit

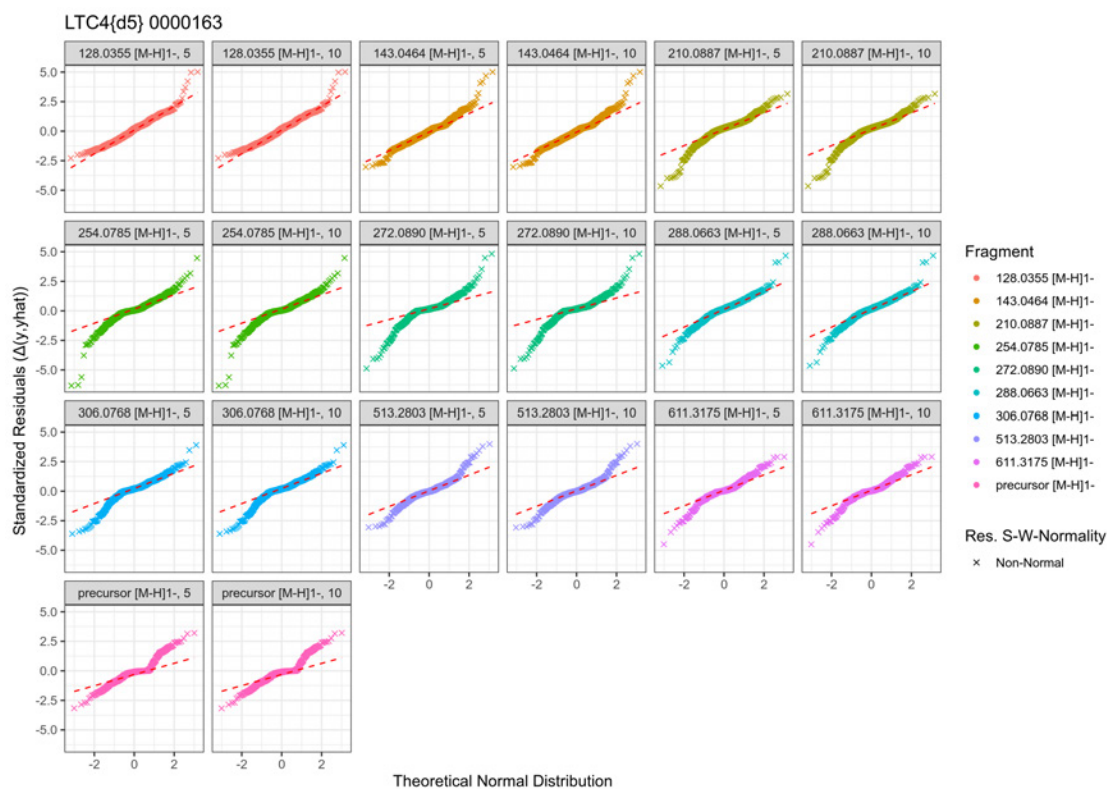

Figure 203. Quantile-quantile plot of residuals

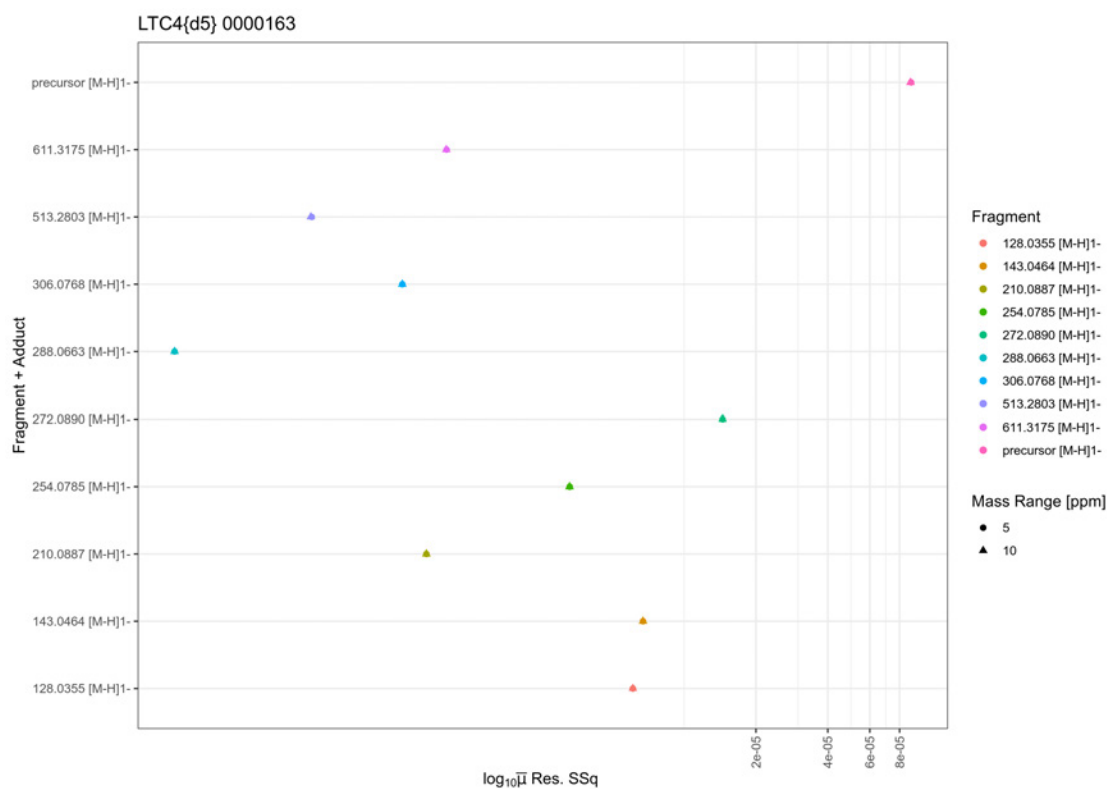

Figure 204. Normalized sum-of-squares of the residuals



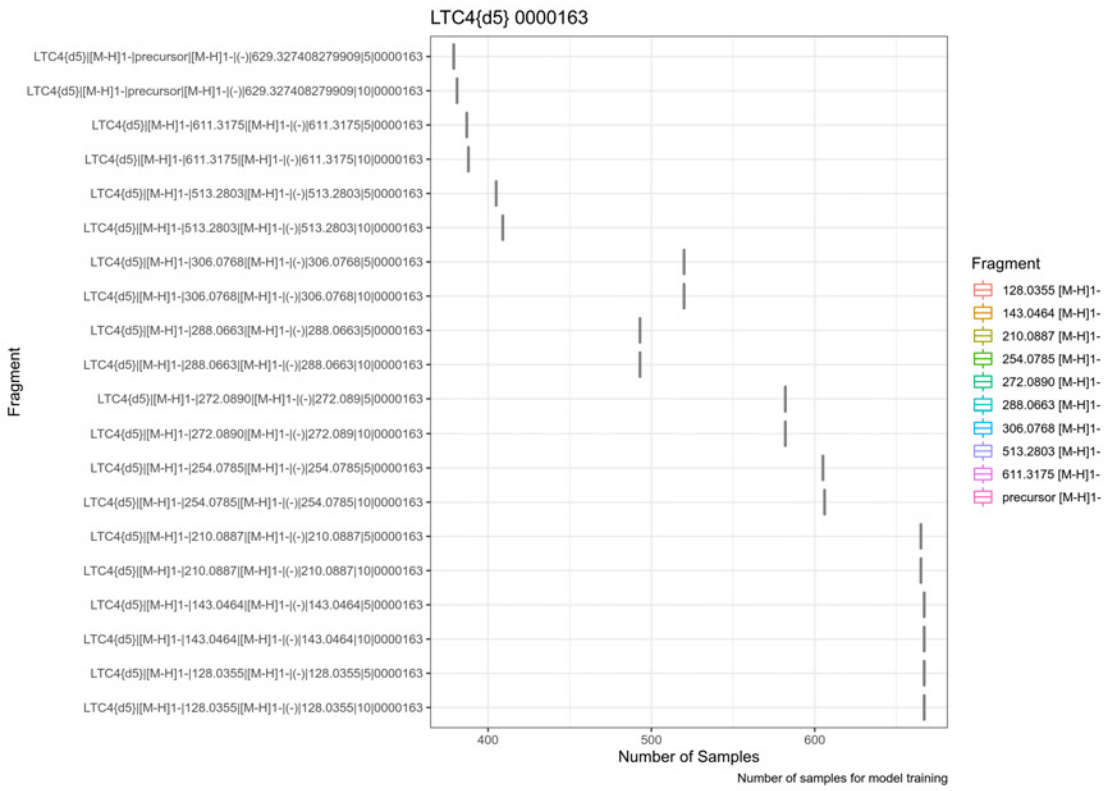

Figure 205. Number of samples used for training per combination Id

# 1.42. LTD4{d5} [M-H]1- 0000153

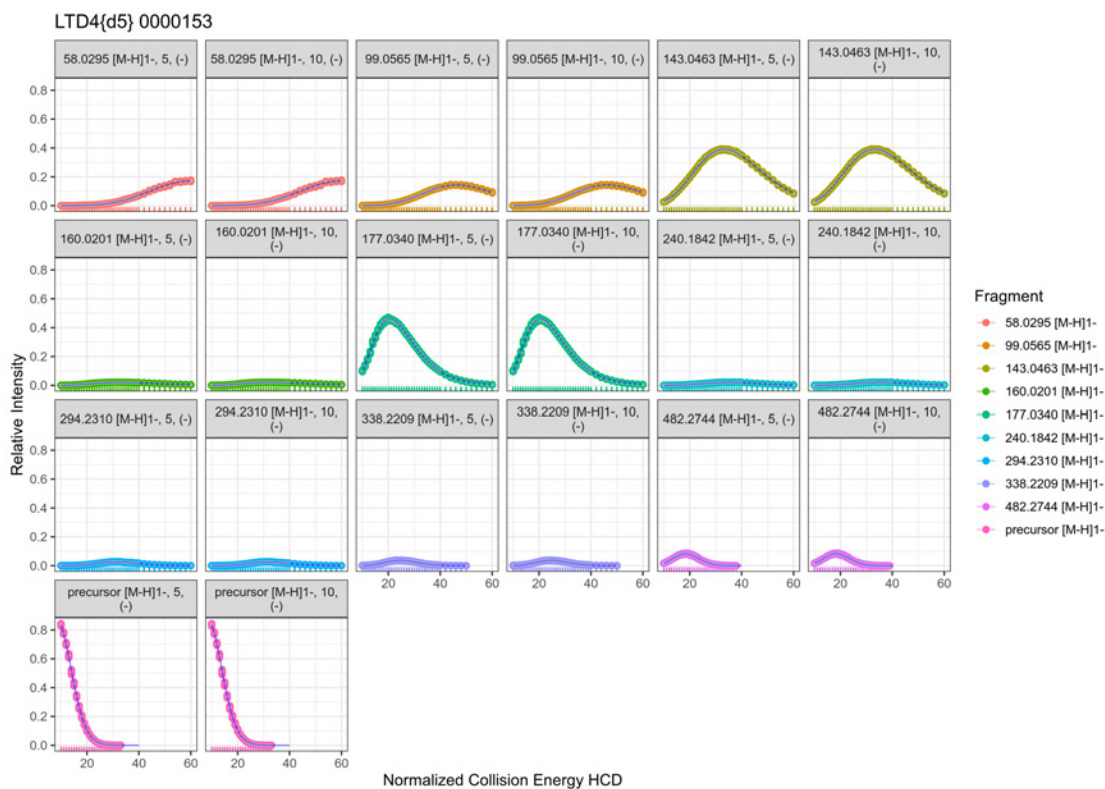

Figure 206. Nonlinear fit

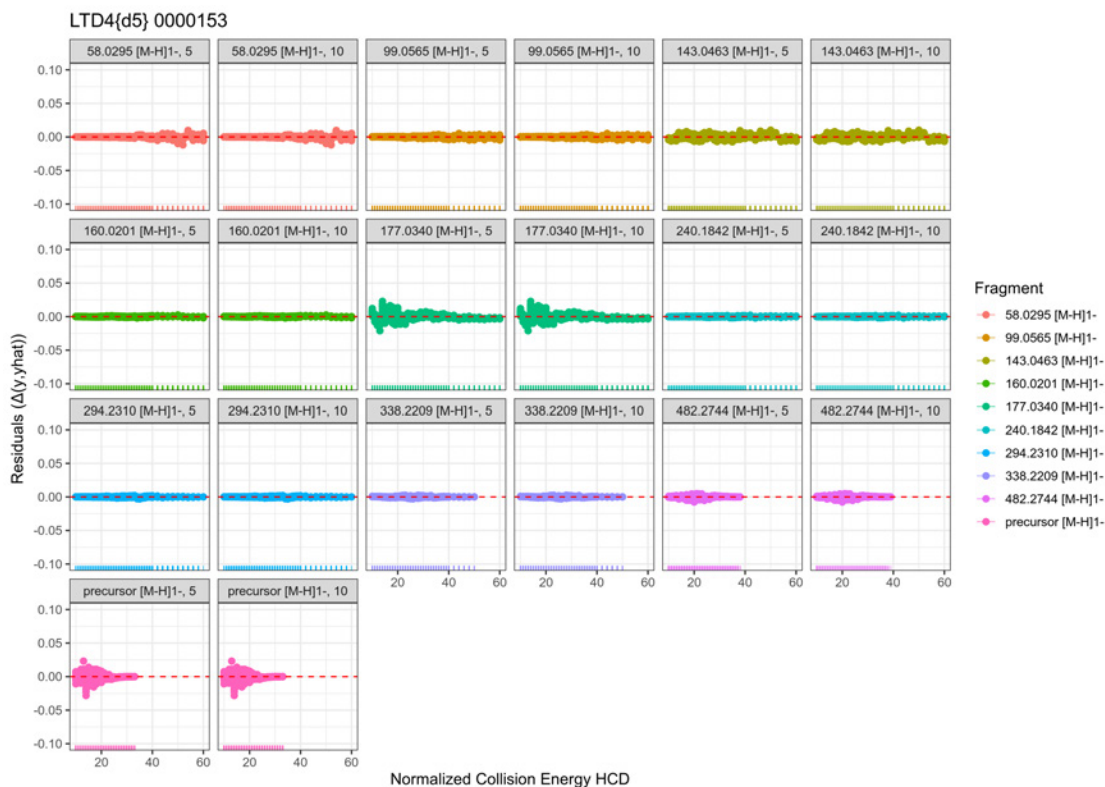

Figure 207. Residuals of nonlinear fit

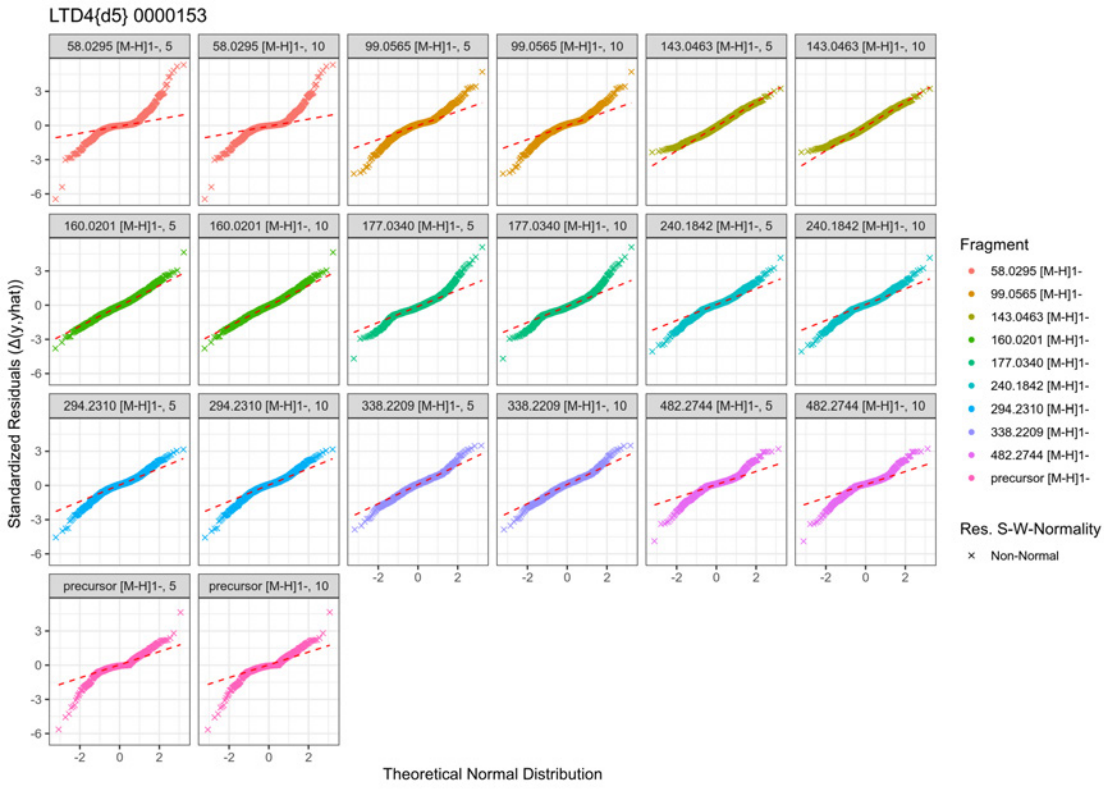

Figure 208. Quantile-quantile plot of residuals

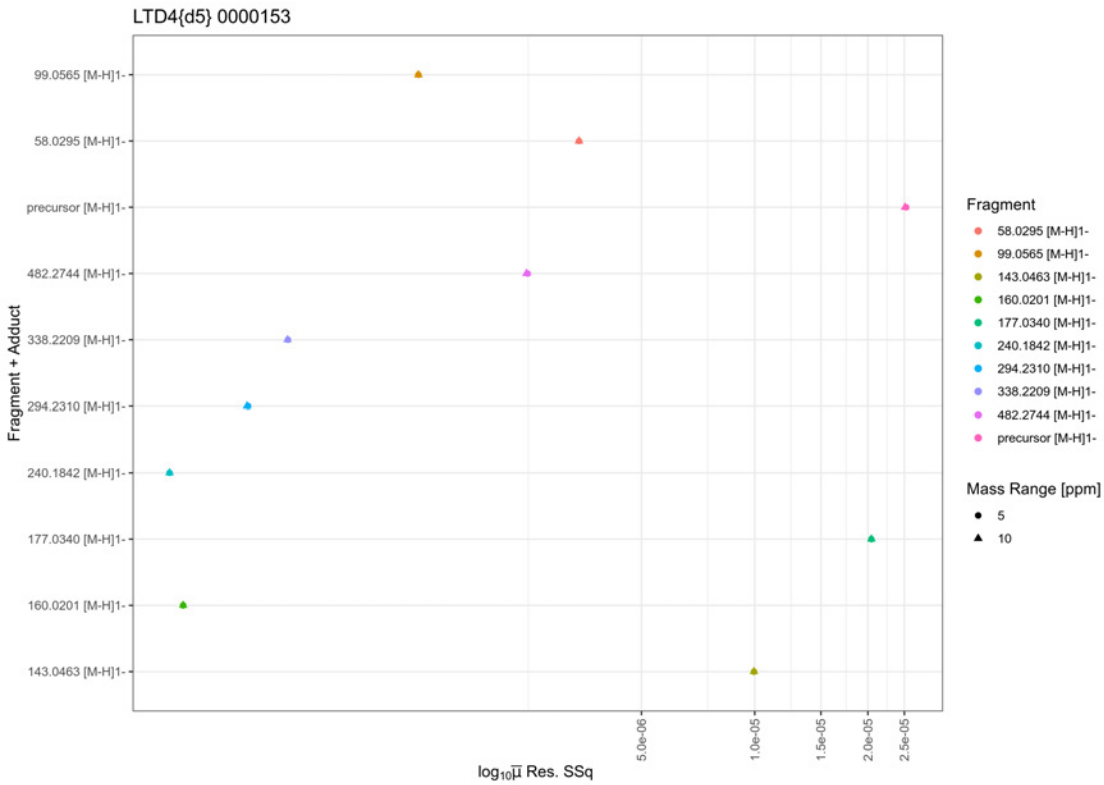

Figure 209. Normalized sum-of-squares of the residuals

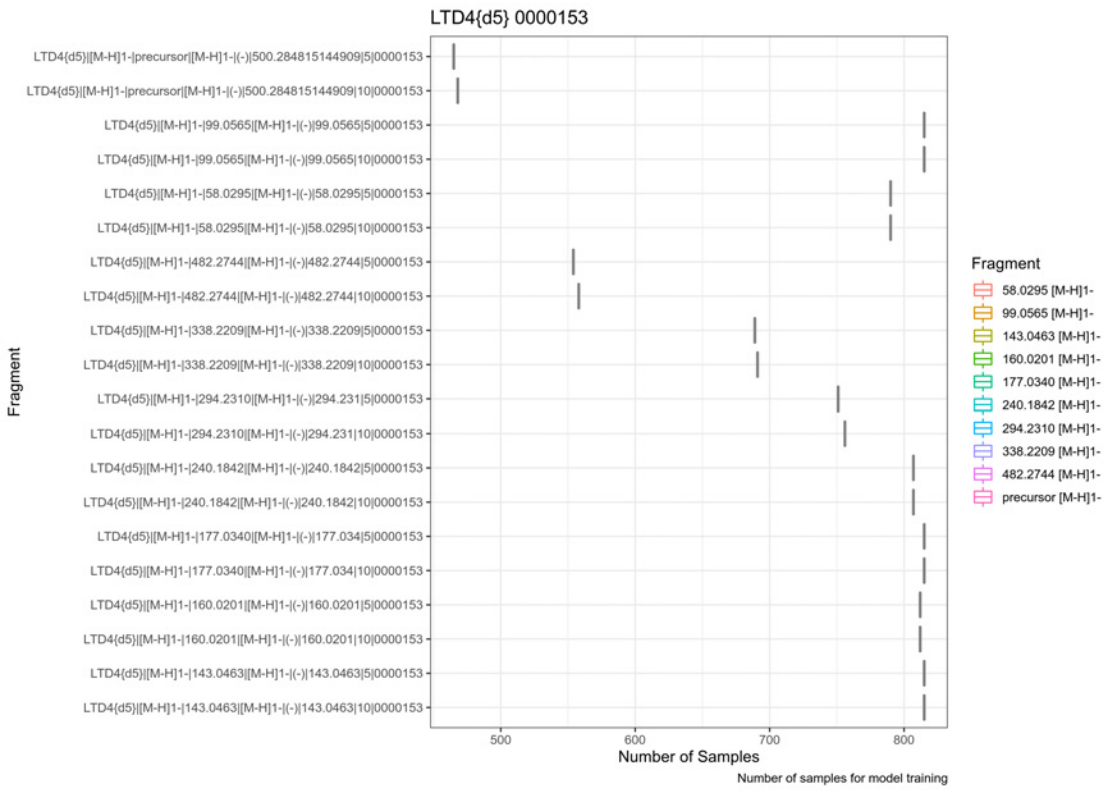

Figure 210. Number of samples used for training per combination Id

# 1.43. Maresin 1 [M-H]1- 0001319

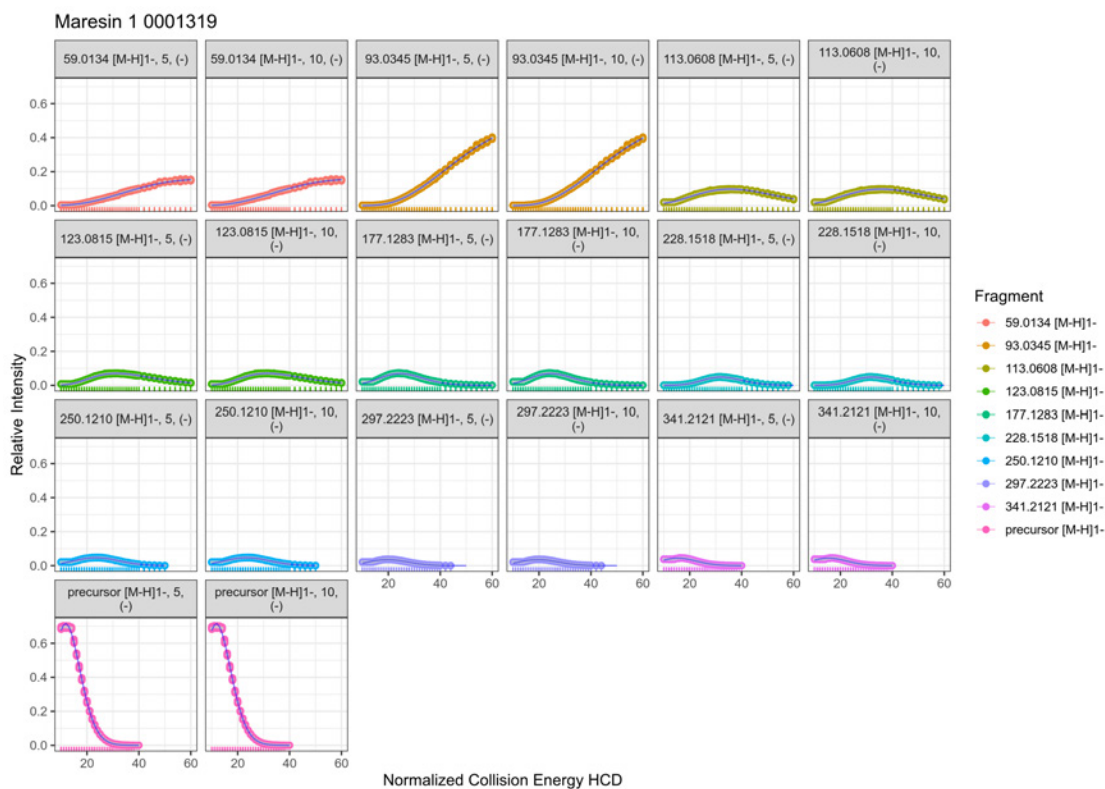

Figure 211. Nonlinear fit

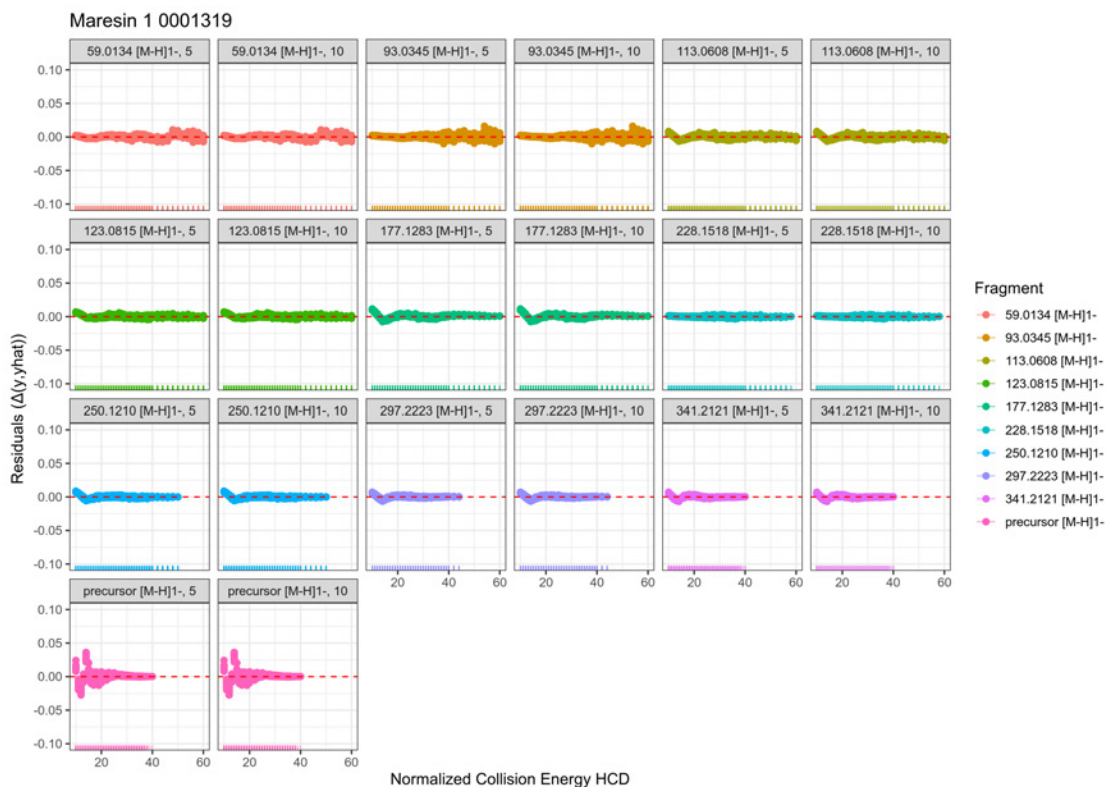

Figure 212. Residuals of nonlinear fit

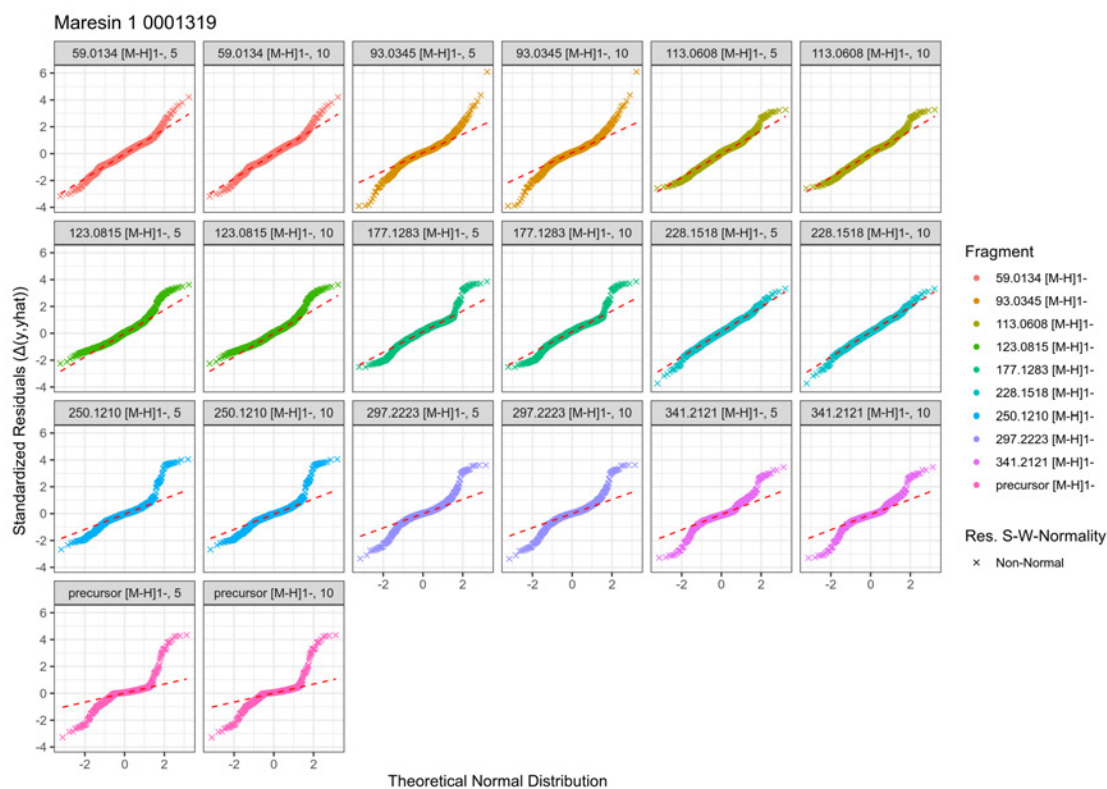

Figure 213. Quantile-quantile plot of residuals

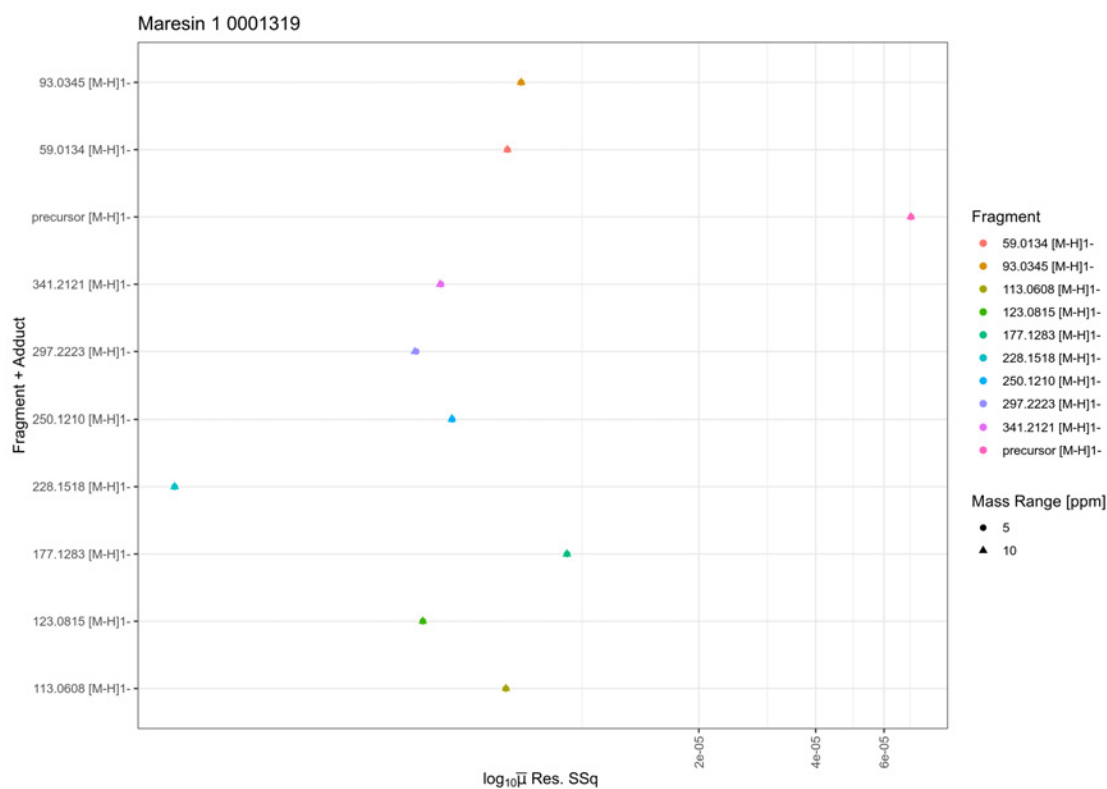

Figure 214. Normalized sum-of-squares of the residuals



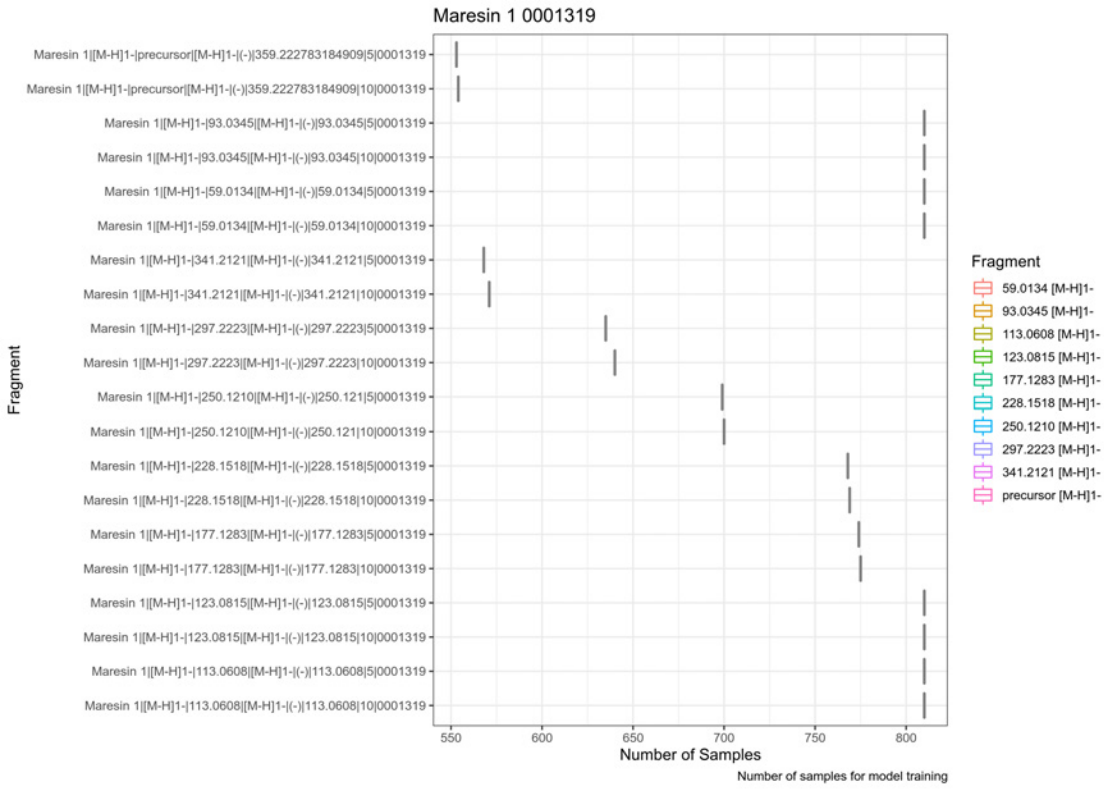

Figure 215. Number of samples used for training per combination Id

# 1.44. PGB2{d4} [M-H]1- 0000151

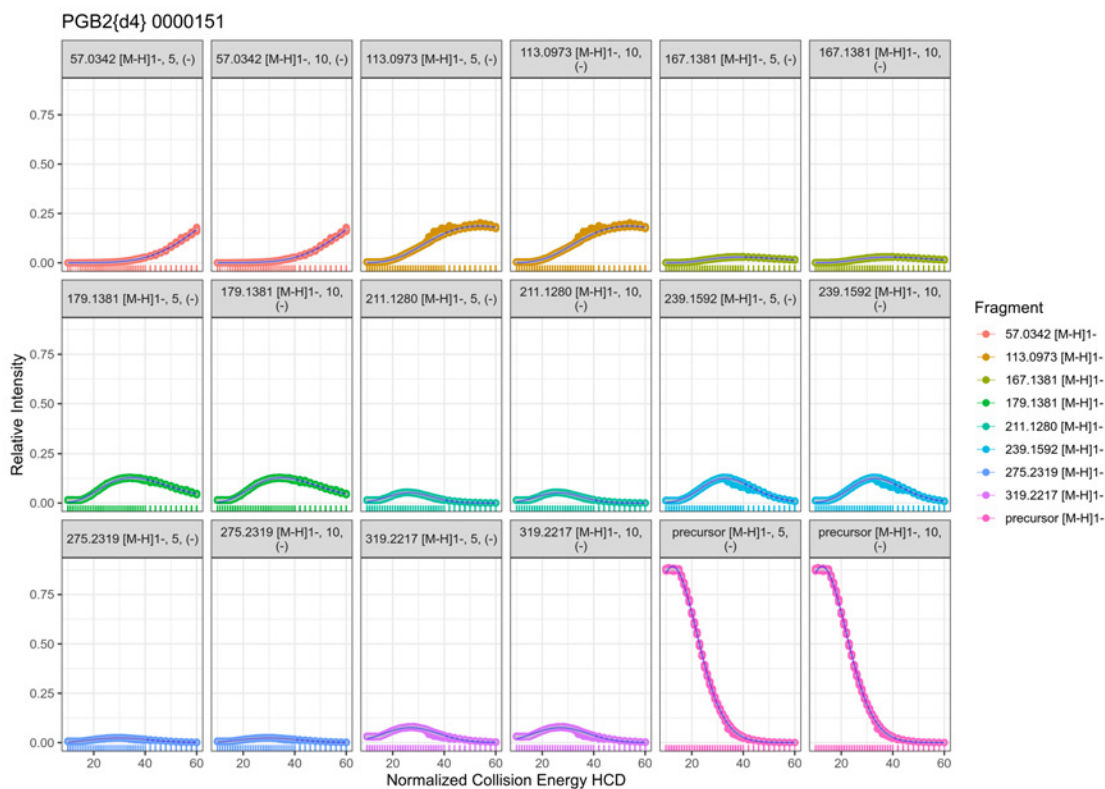

Figure 216. Nonlinear fit

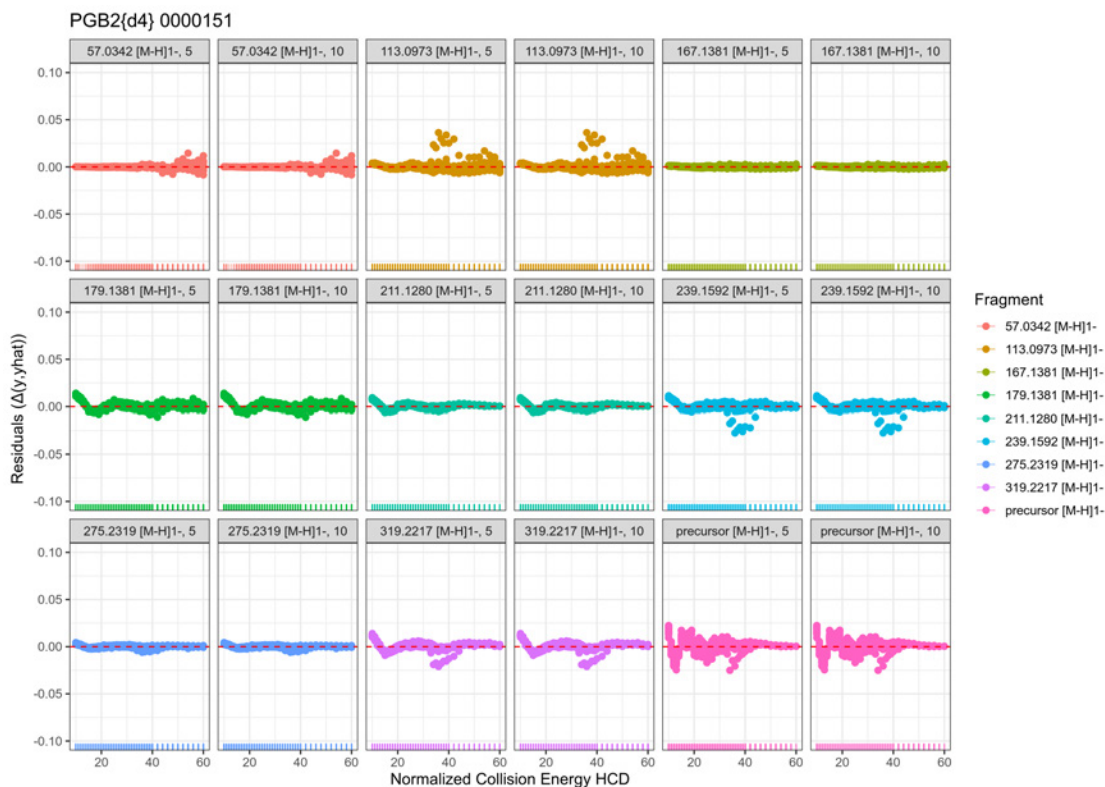

Figure 217. Residuals of nonlinear fit

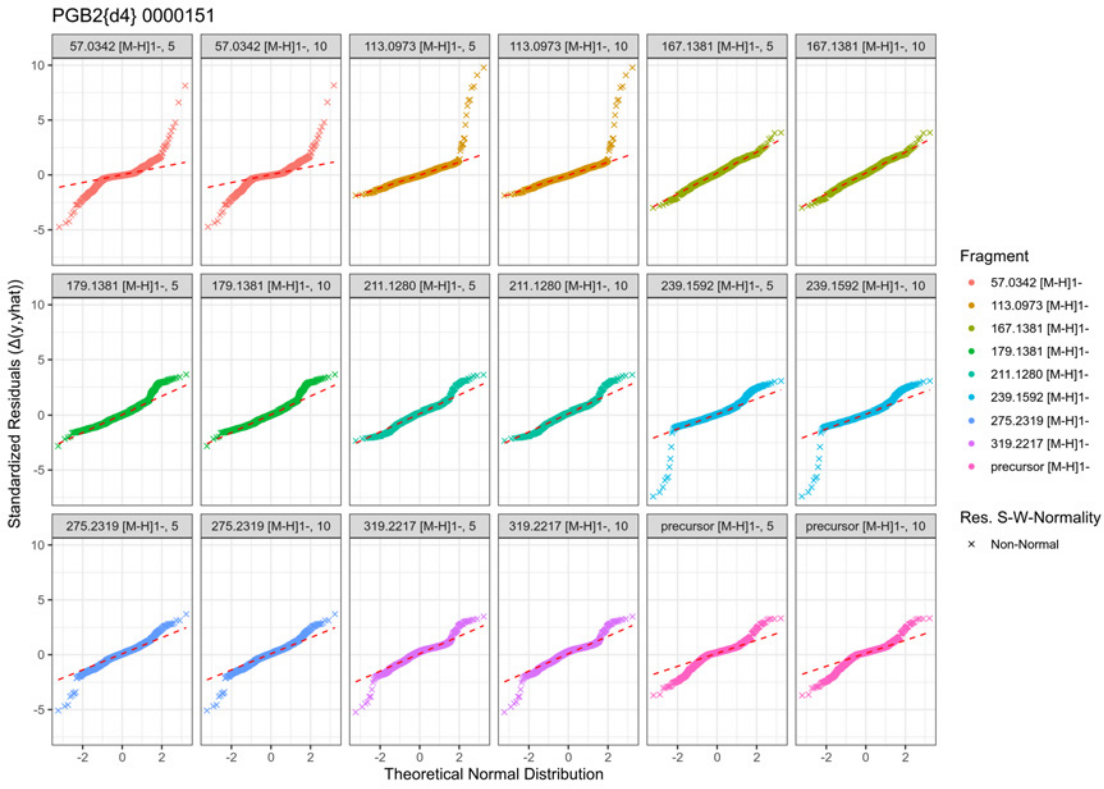

Figure 218. Quantile-quantile plot of residuals

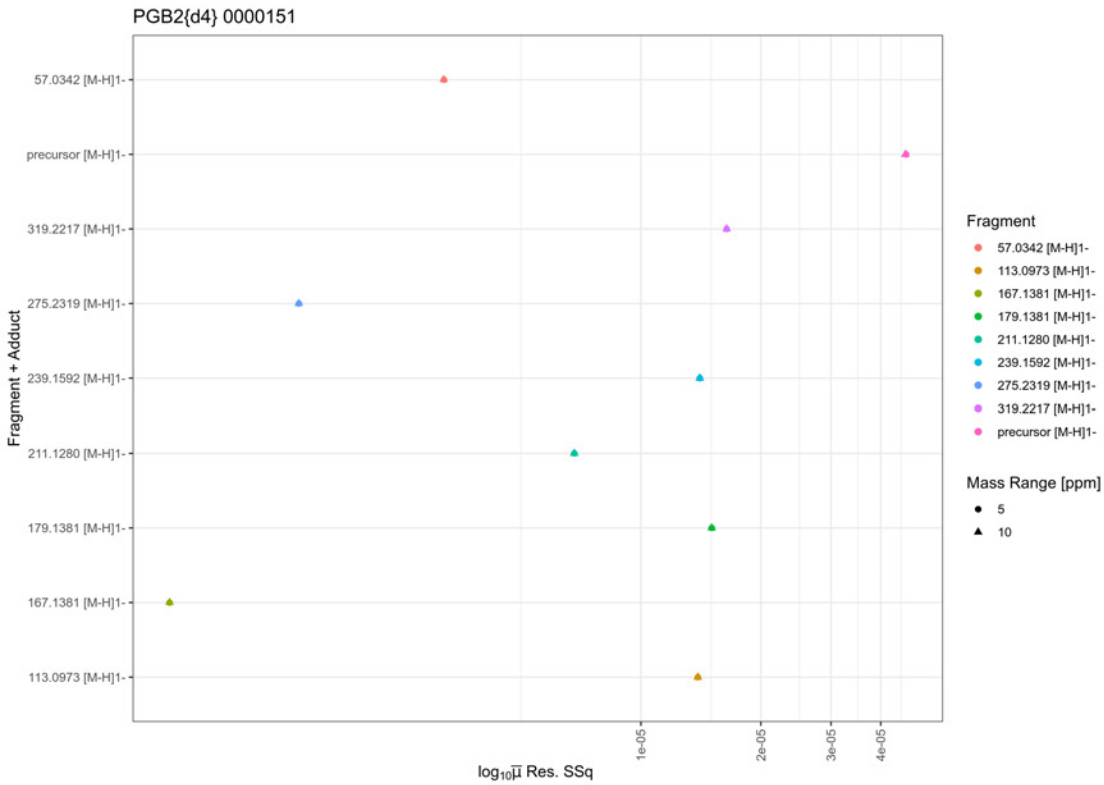

Figure 219. Normalized sum-of-squares of the residuals

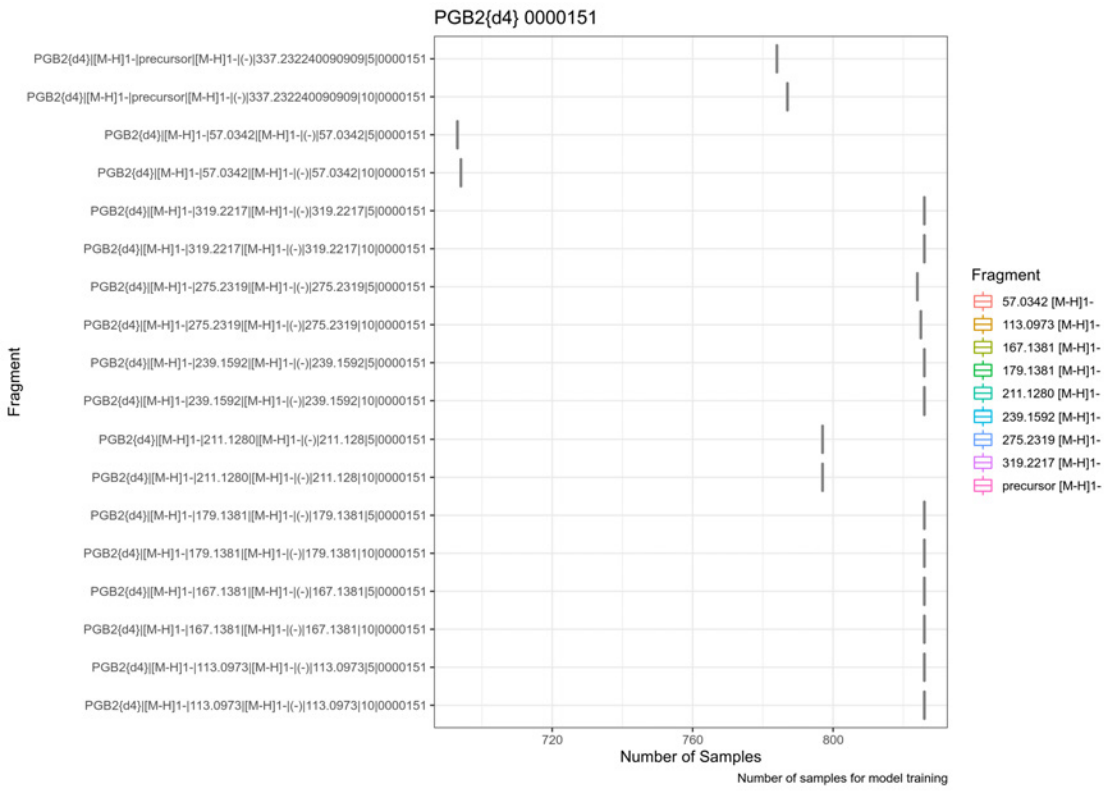

Figure 220. Number of samples used for training per combination Id

# 1.45. PGD2{d4} [M-H]1- 0001311

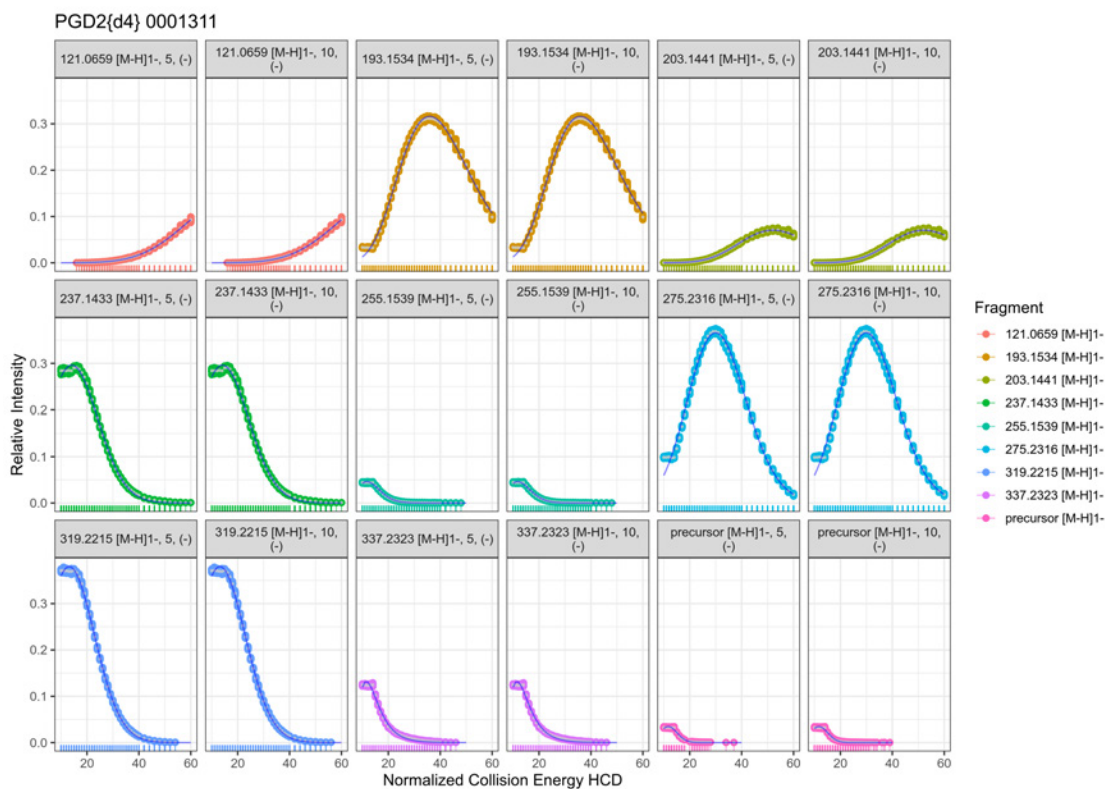

Figure 221. Nonlinear fit

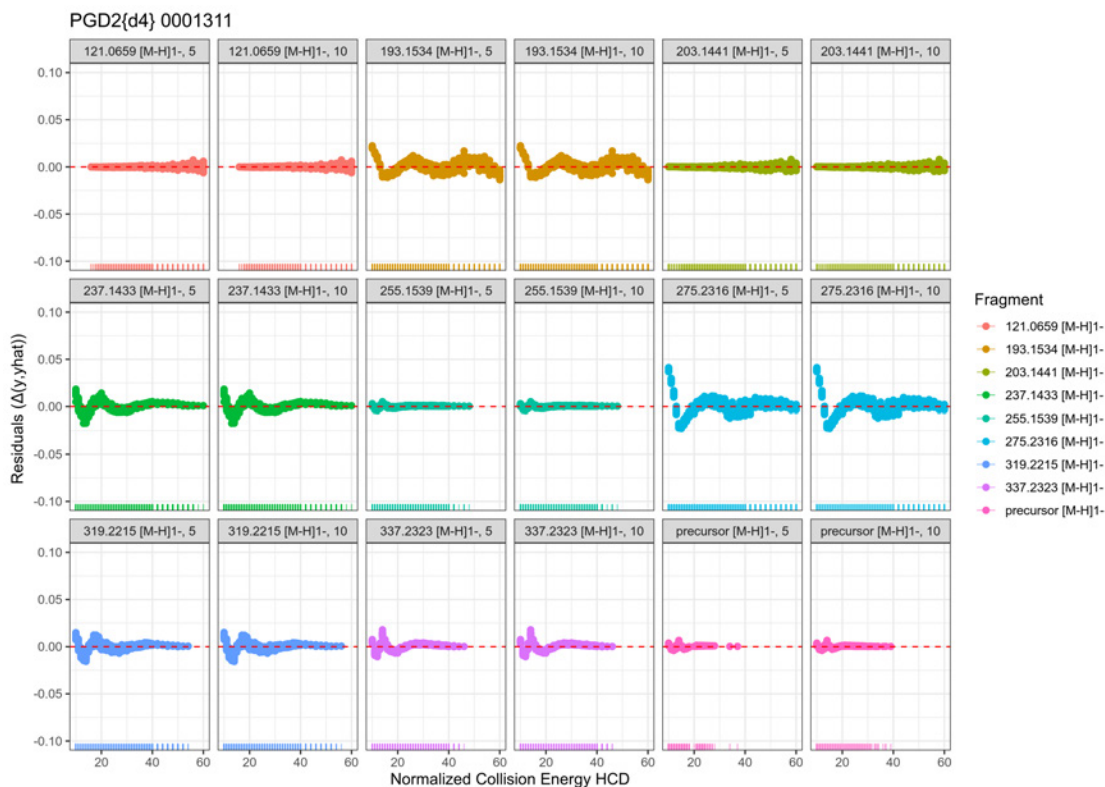

Figure 222. Residuals of nonlinear fit

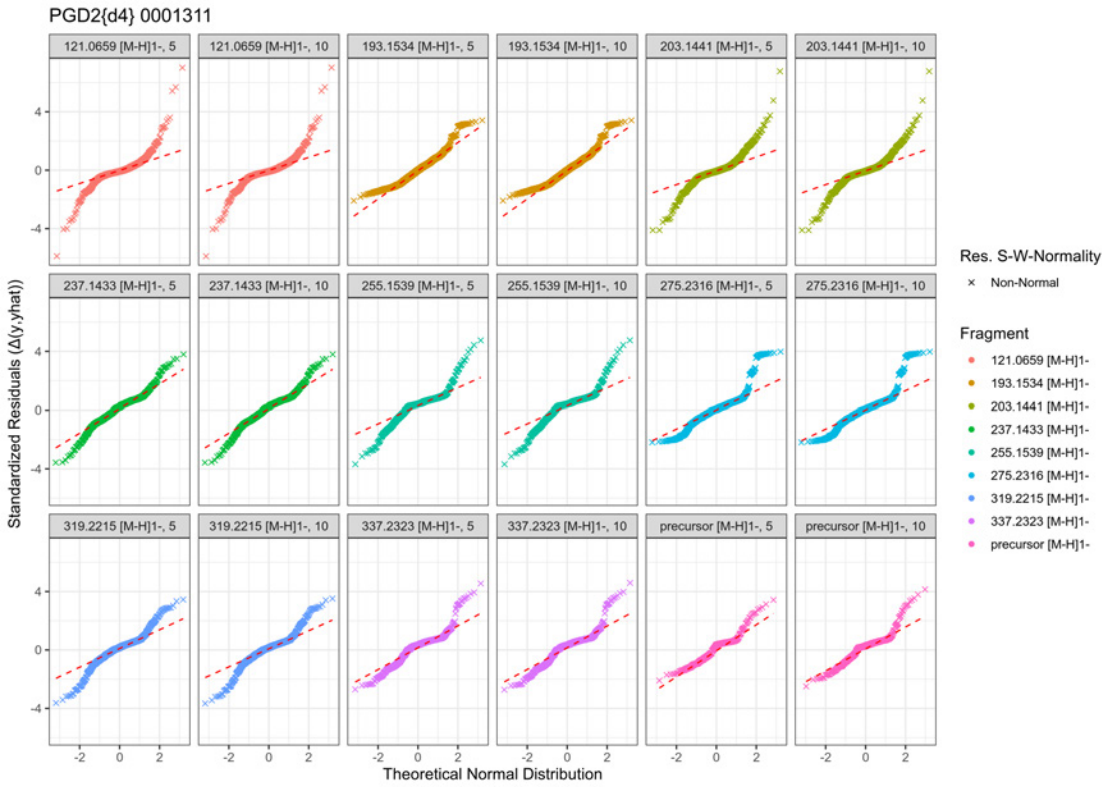

Figure 223. Quantile-quantile plot of residuals

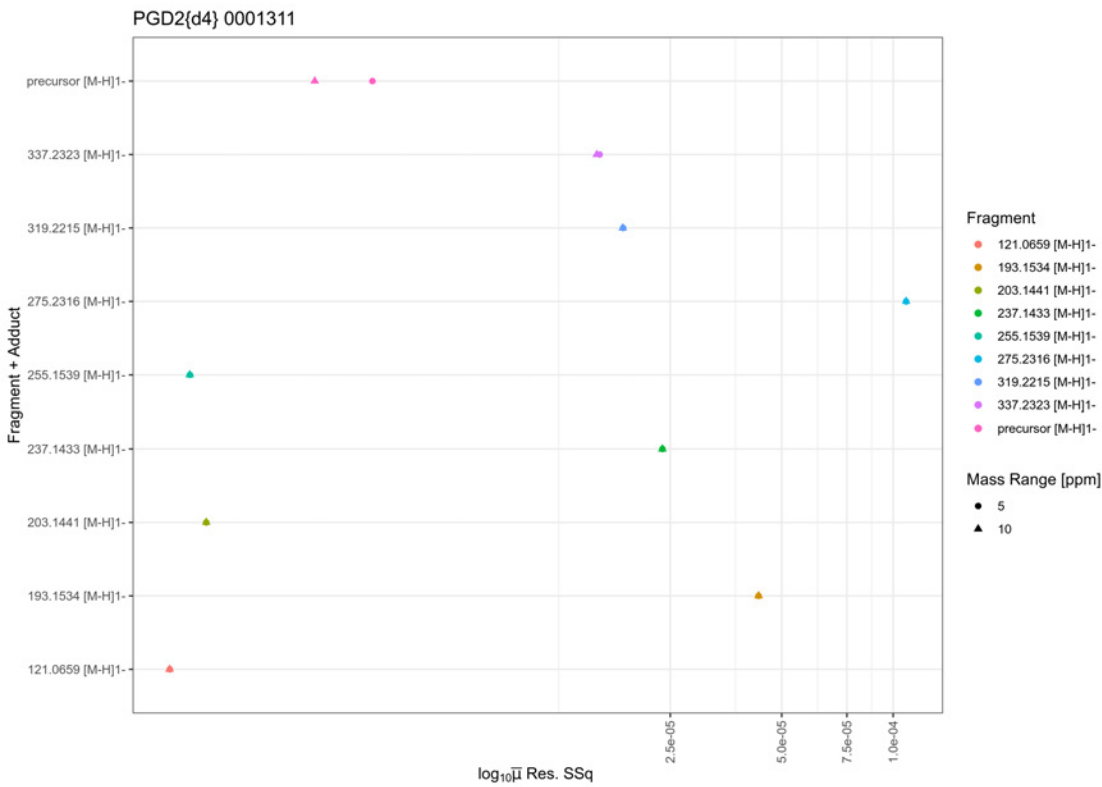

Figure 224. Normalized sum-of-squares of the residuals



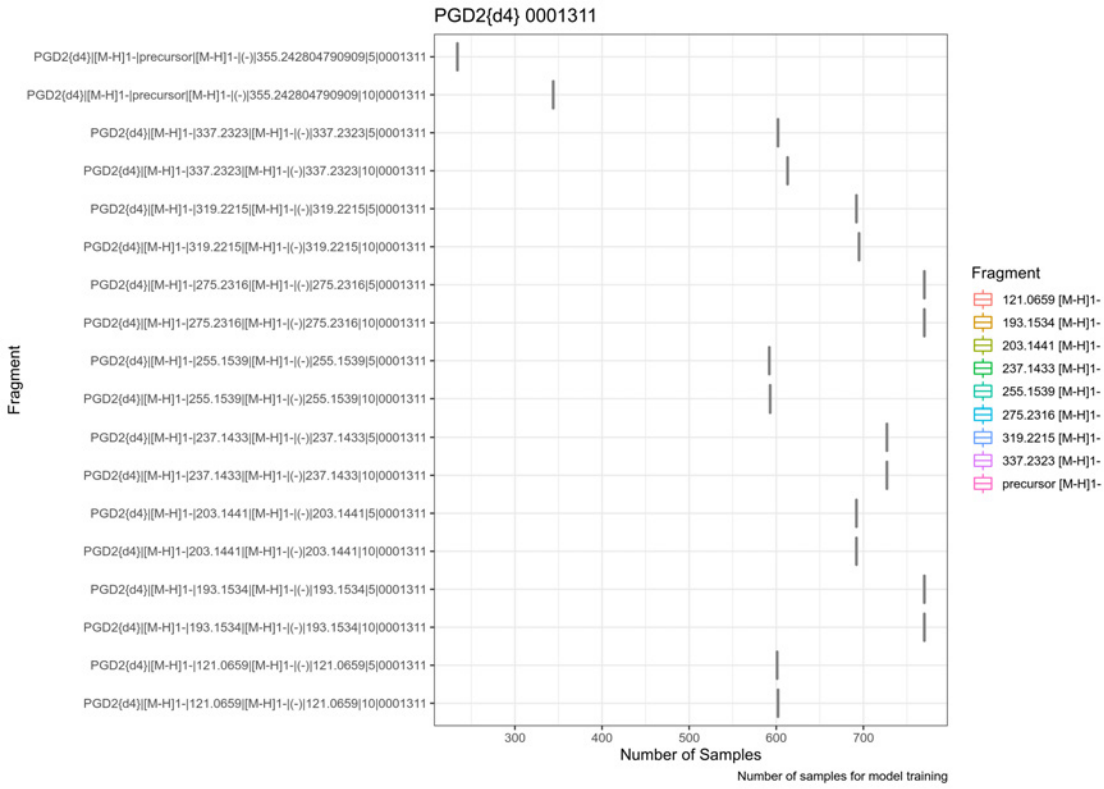

Figure 225. Number of samples used for training per combination Id

# 1.46. PGE2{d4} [M-H]1- 0001313

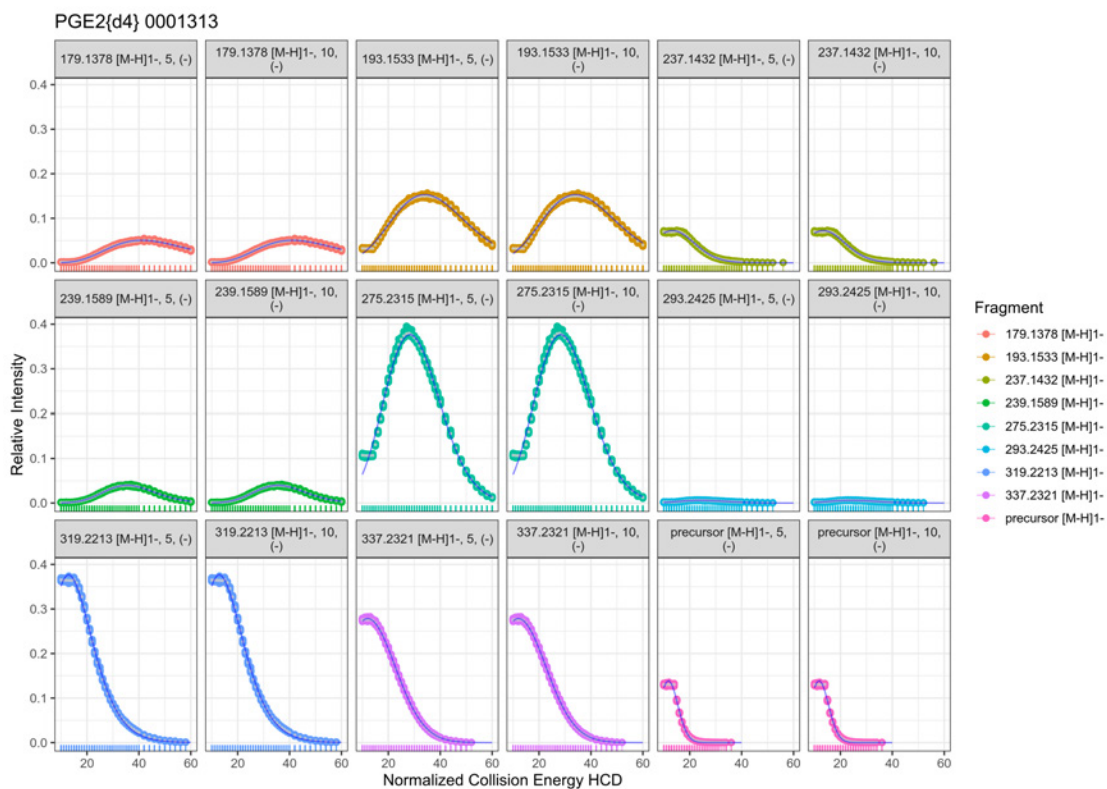

Figure 226. Nonlinear fit

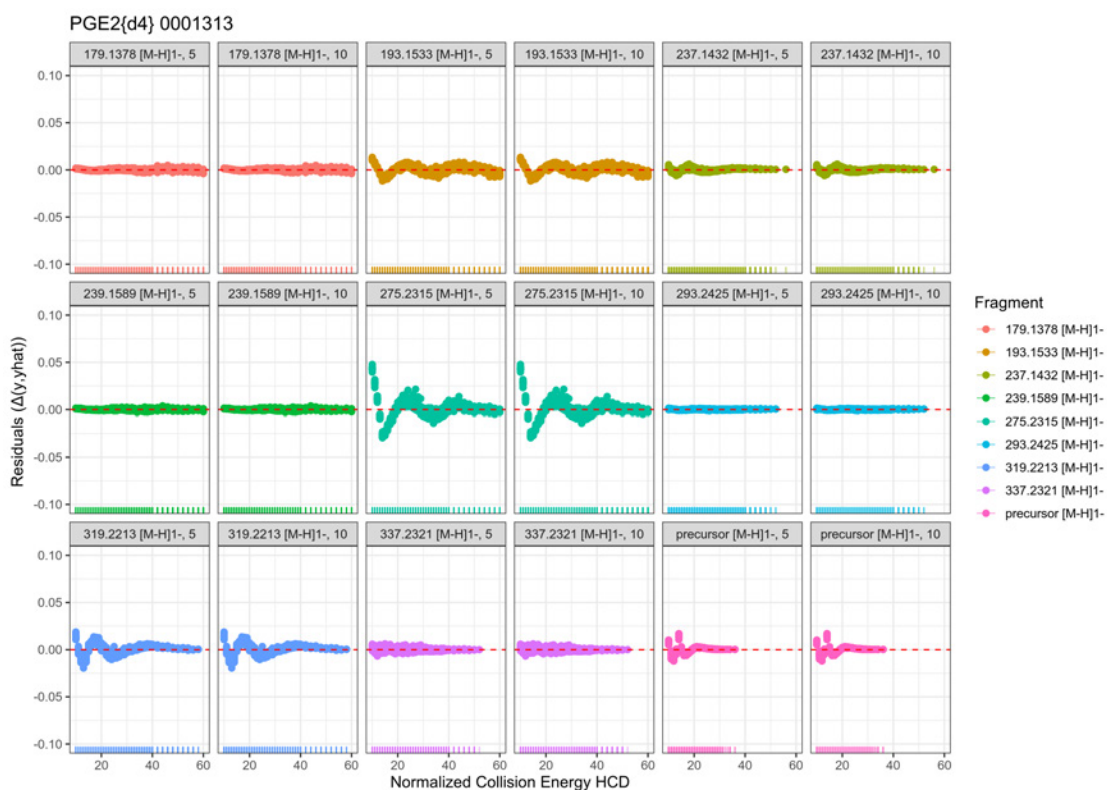

Figure 227. Residuals of nonlinear fit

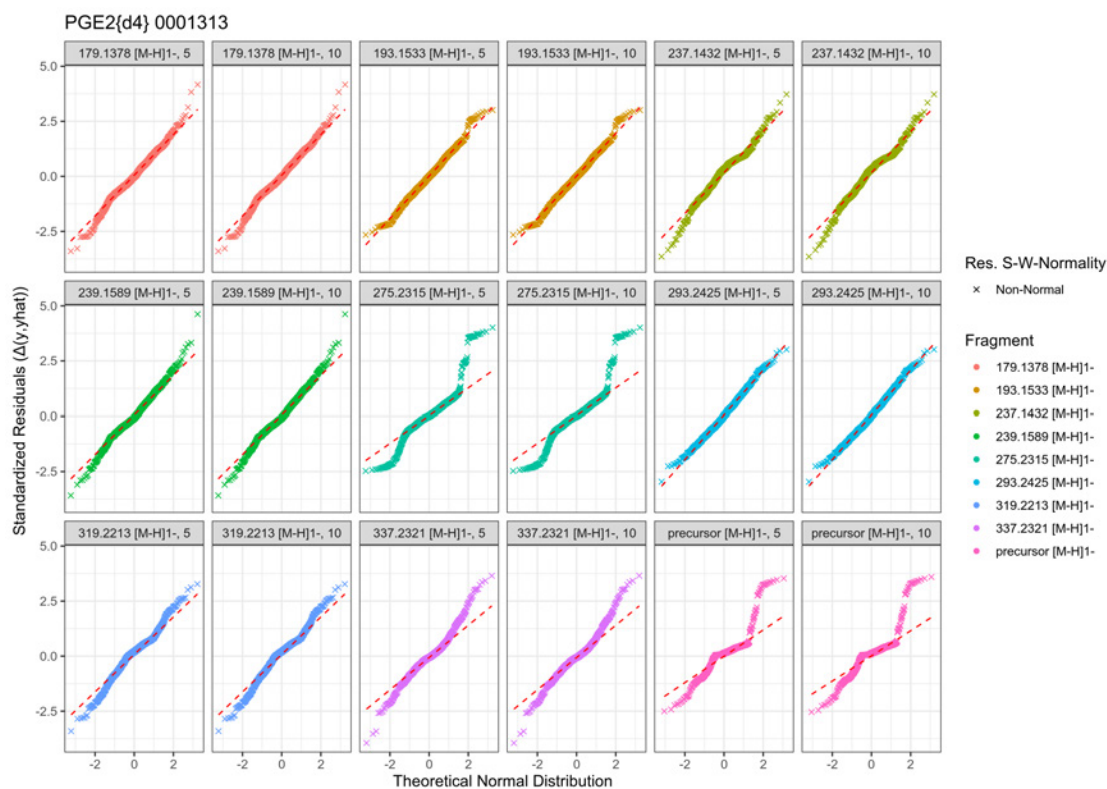

Figure 228. Quantile-quantile plot of residuals

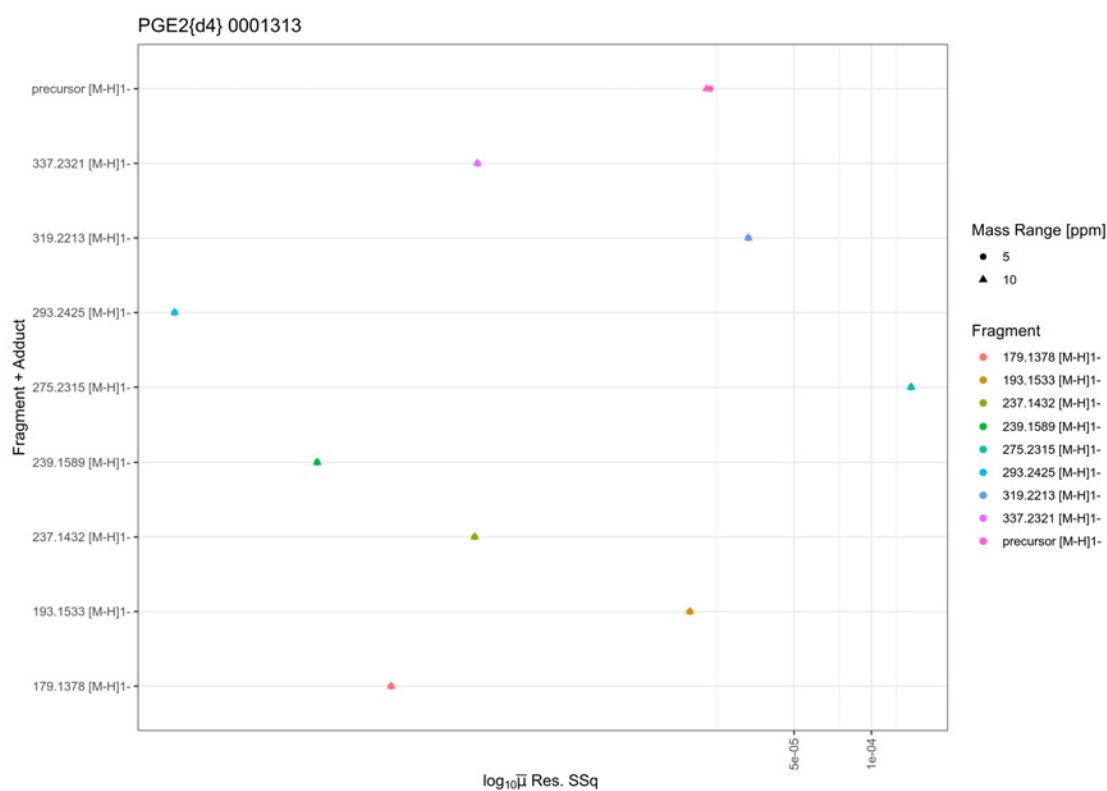

Figure 229. Normalized sum-of-squares of the residuals

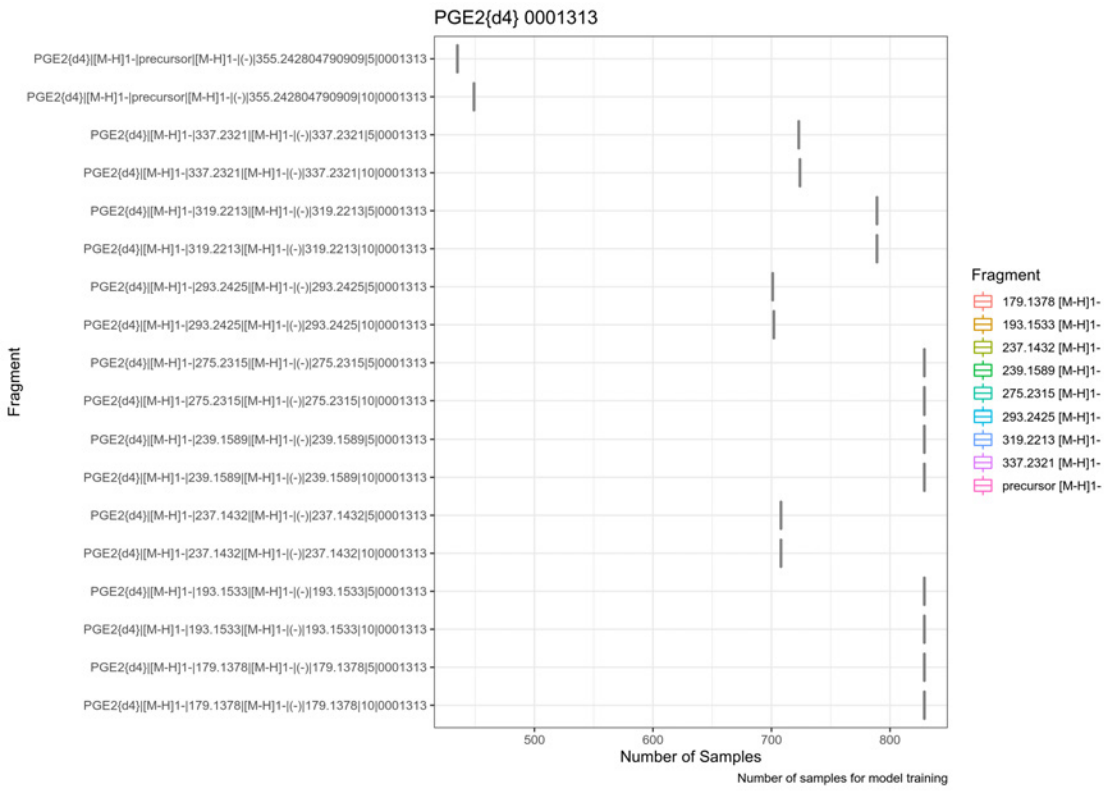

Figure 230. Number of samples used for training per combination Id

# 1.47. PGE2{d9} [M-H]1- 0001321

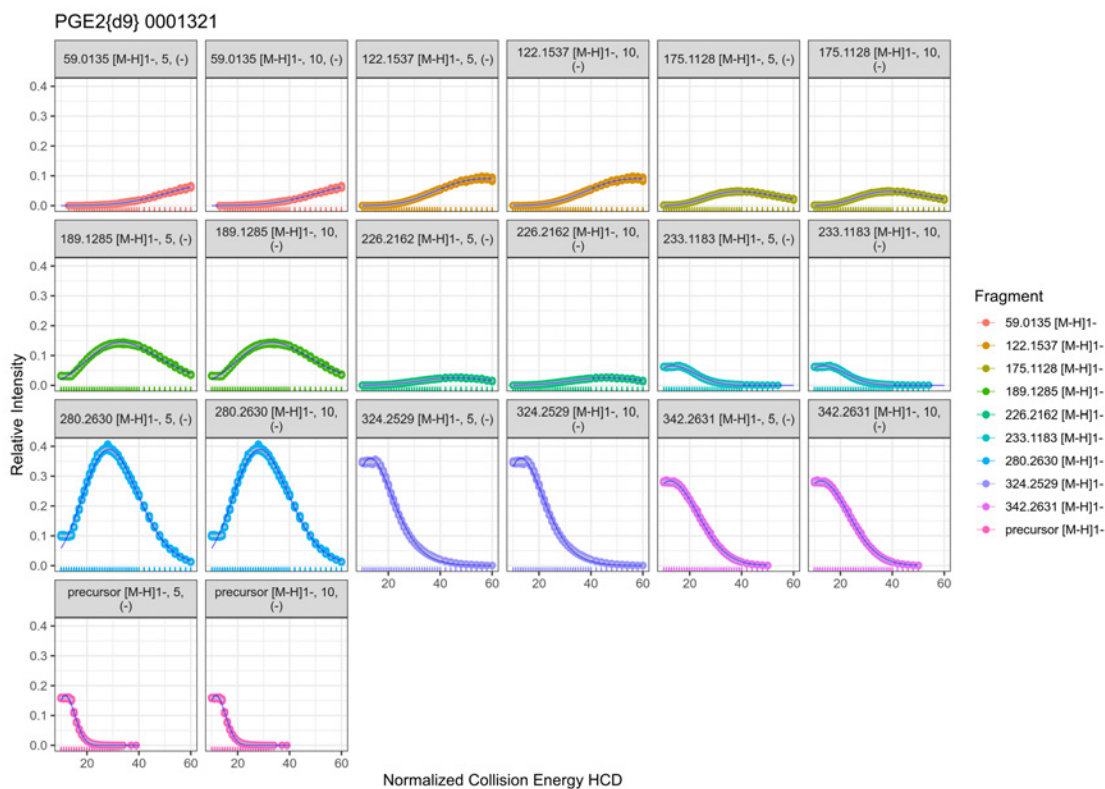

Figure 231. Nonlinear fit

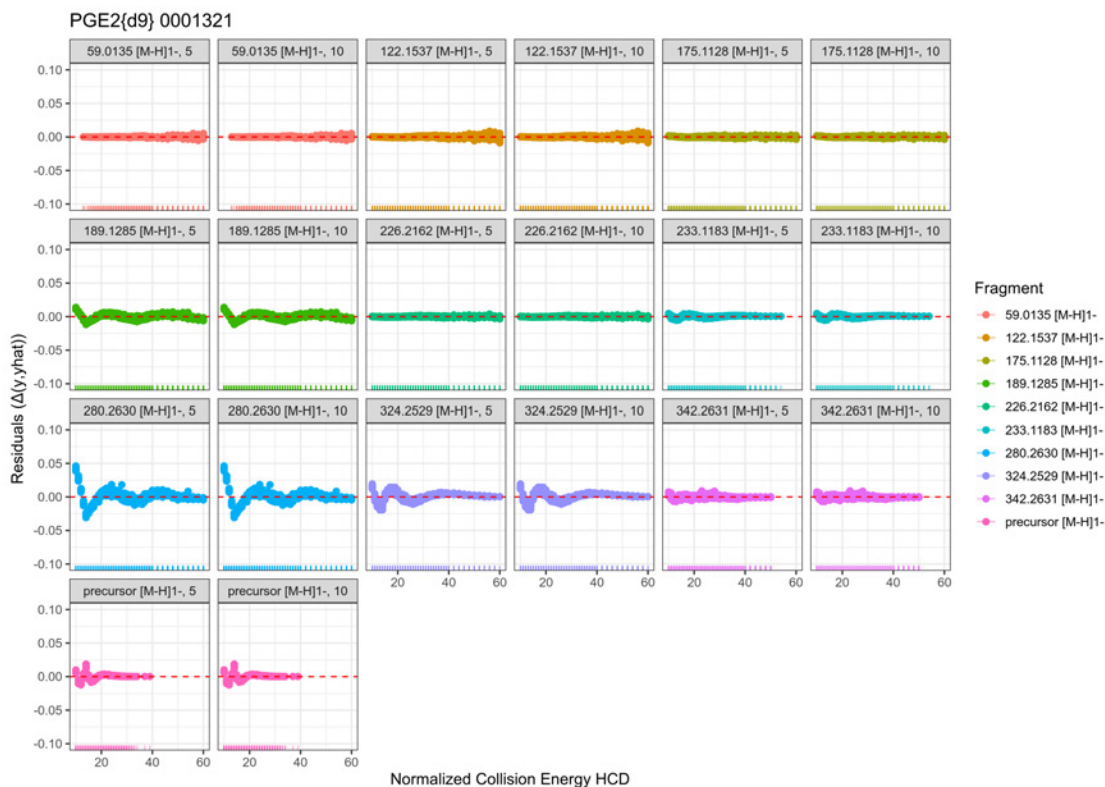

Figure 232. Residuals of nonlinear fit

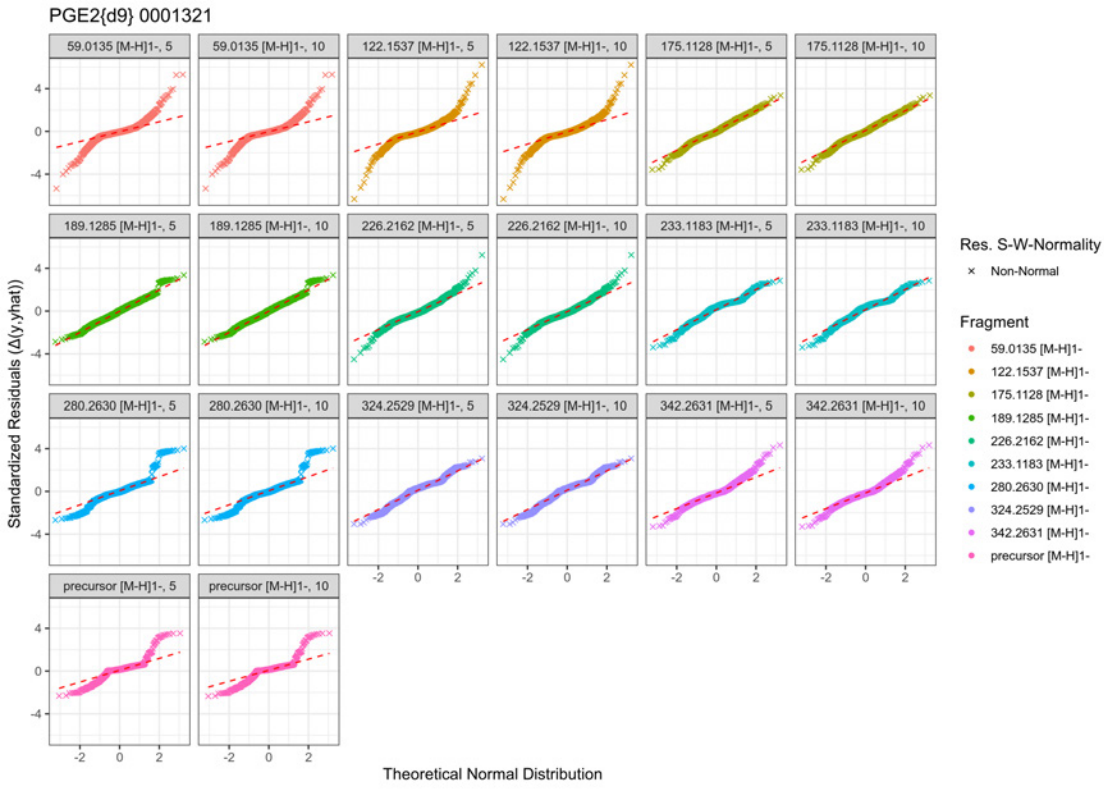

Figure 233. Quantile-quantile plot of residuals

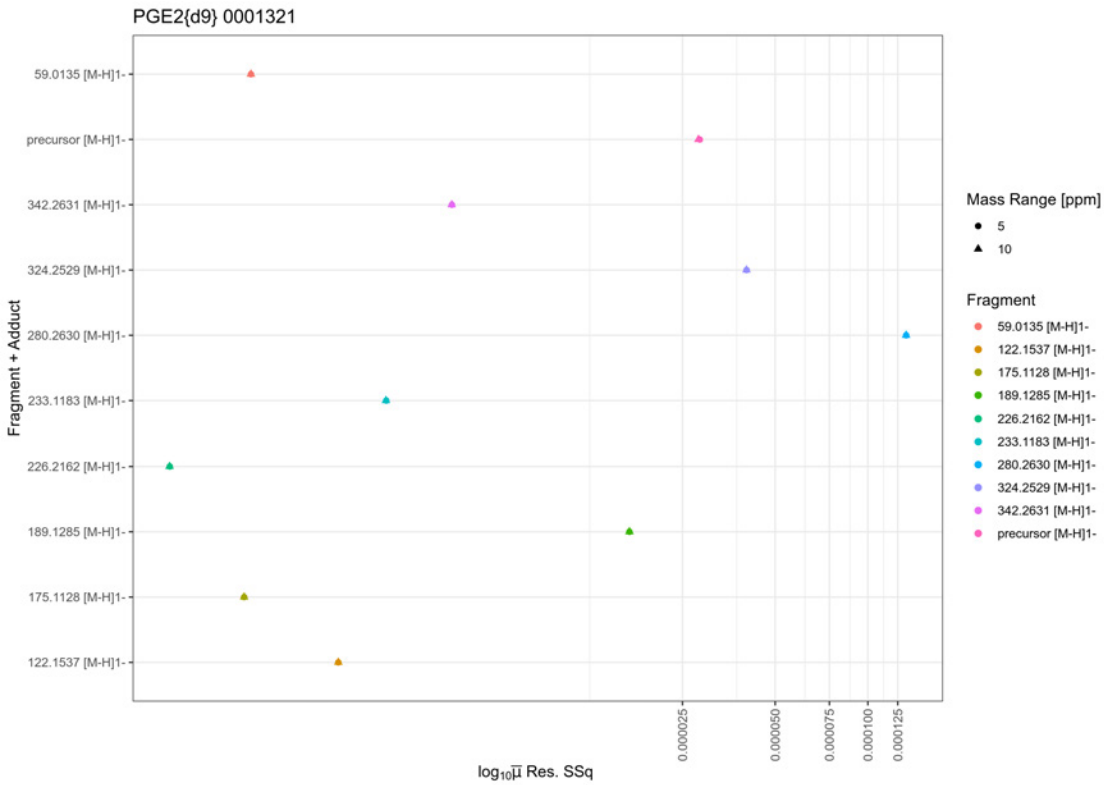

Figure 234. Normalized sum-of-squares of the residuals



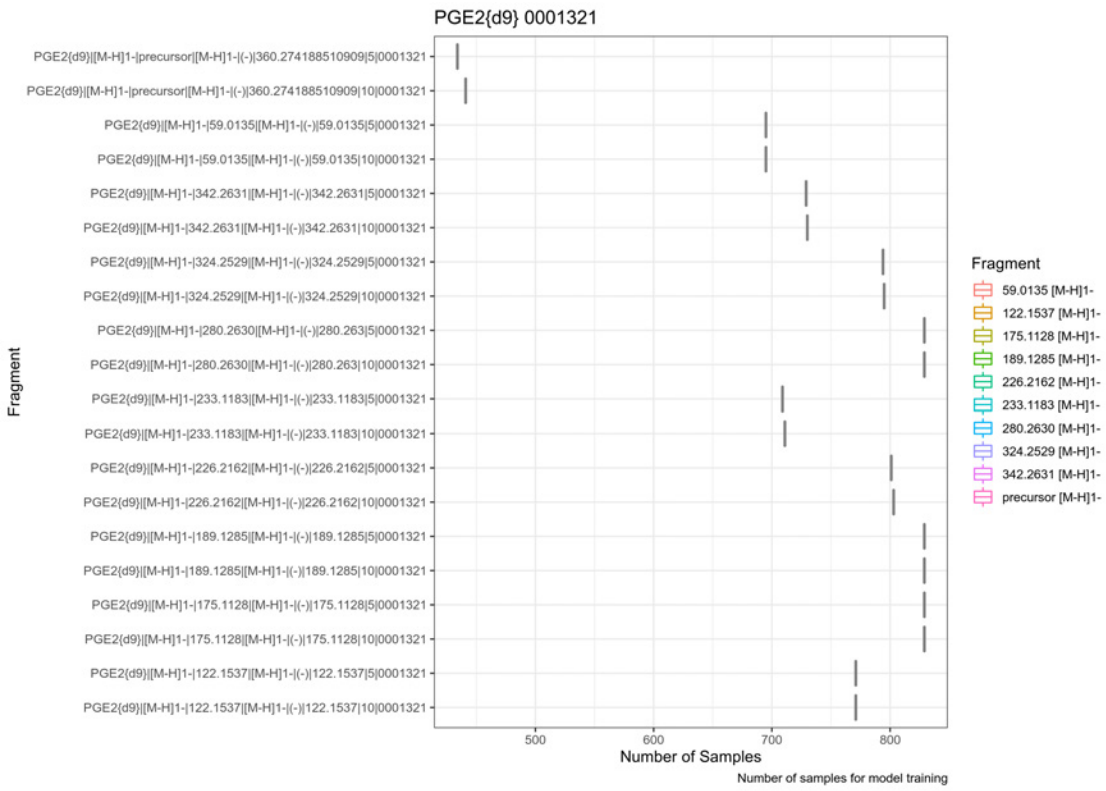

Figure 235. Number of samples used for training per combination Id

# 1.48. PGF2alpha{d4} [M-H]1- 0000125

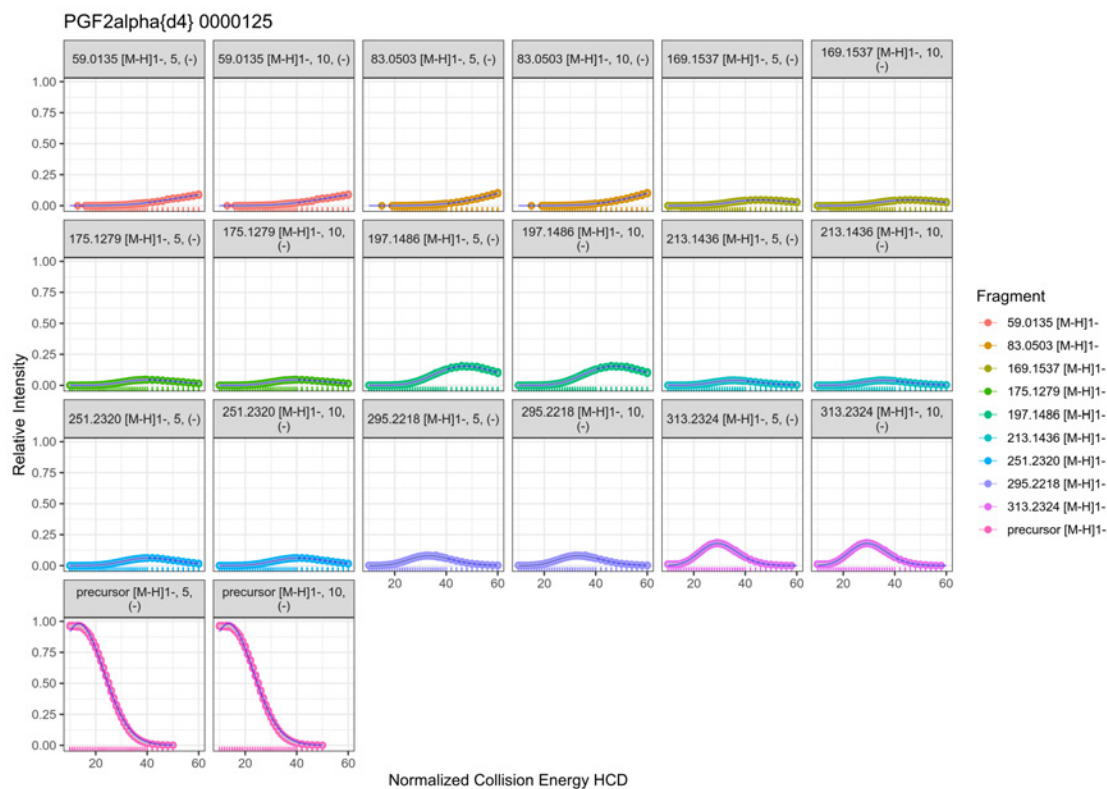

Figure 236. Nonlinear fit

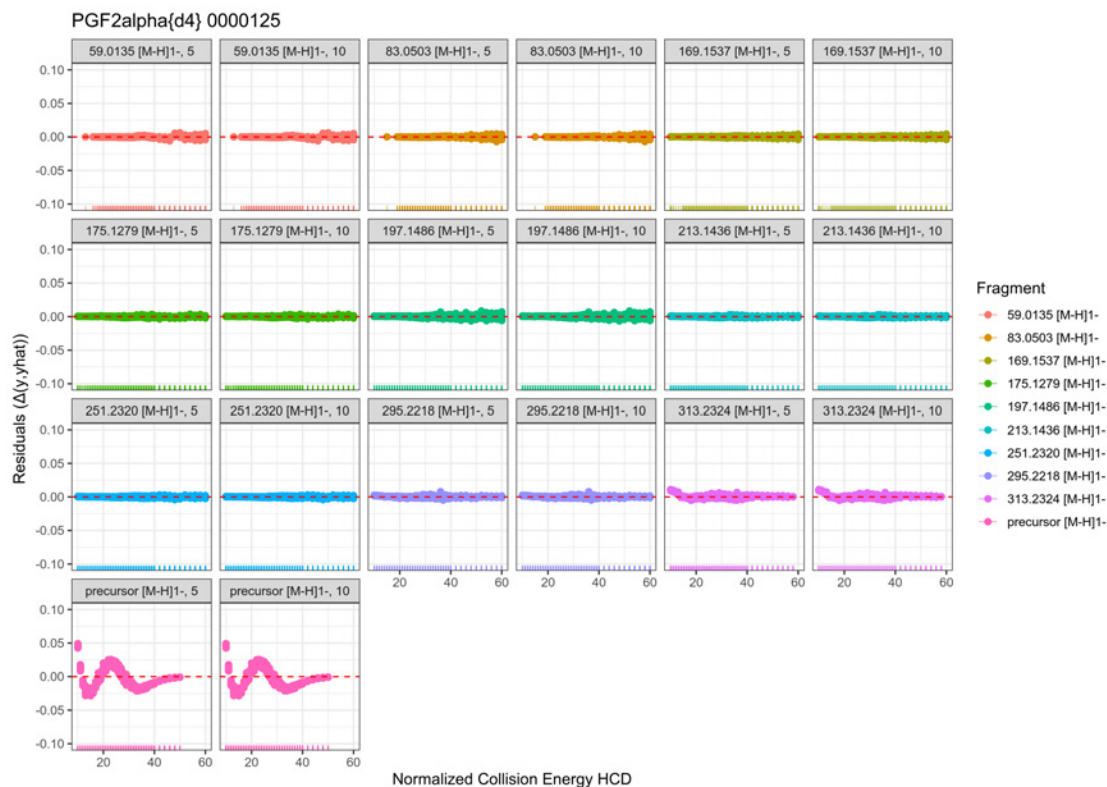

Figure 237. Residuals of nonlinear fit

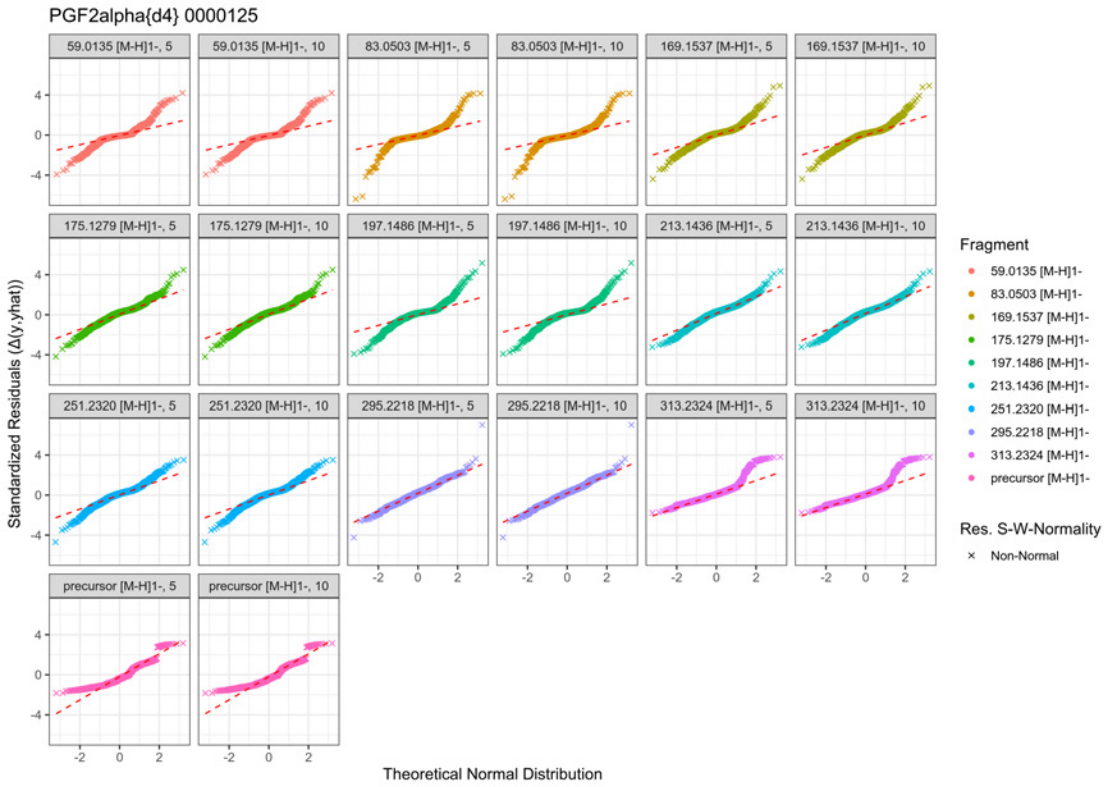

Figure 238. Quantile-quantile plot of residuals

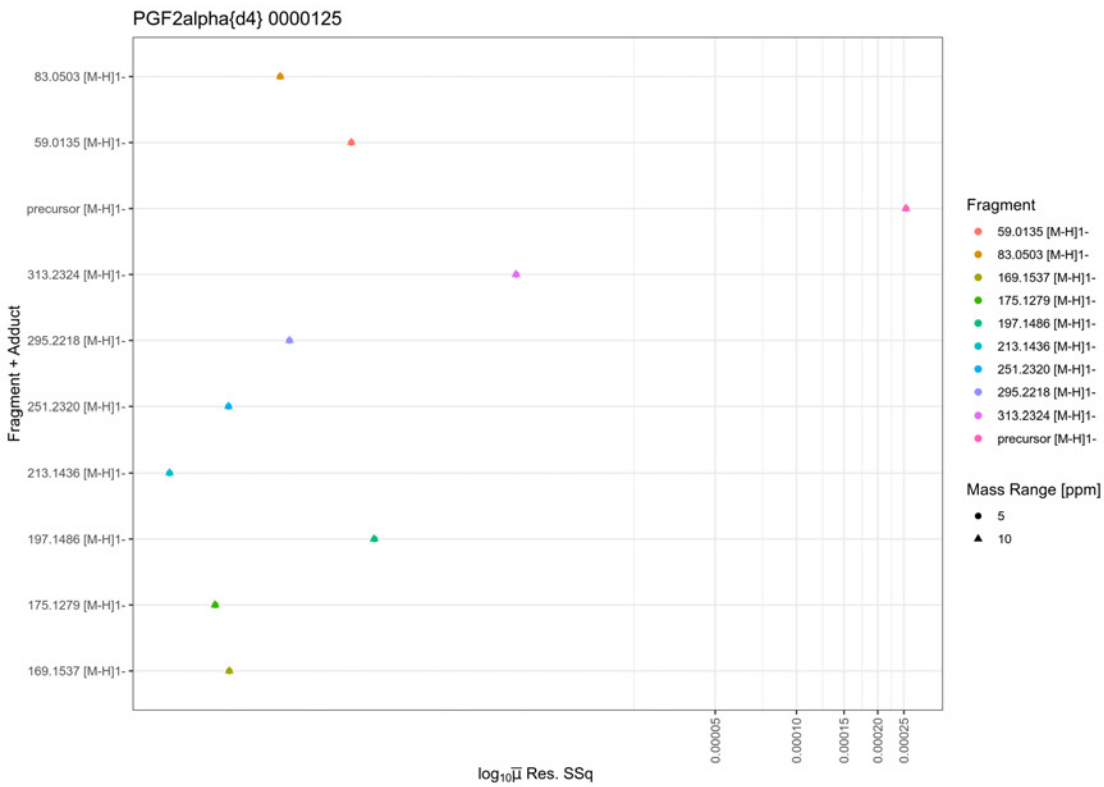

Figure 239. Normalized sum-of-squares of the residuals

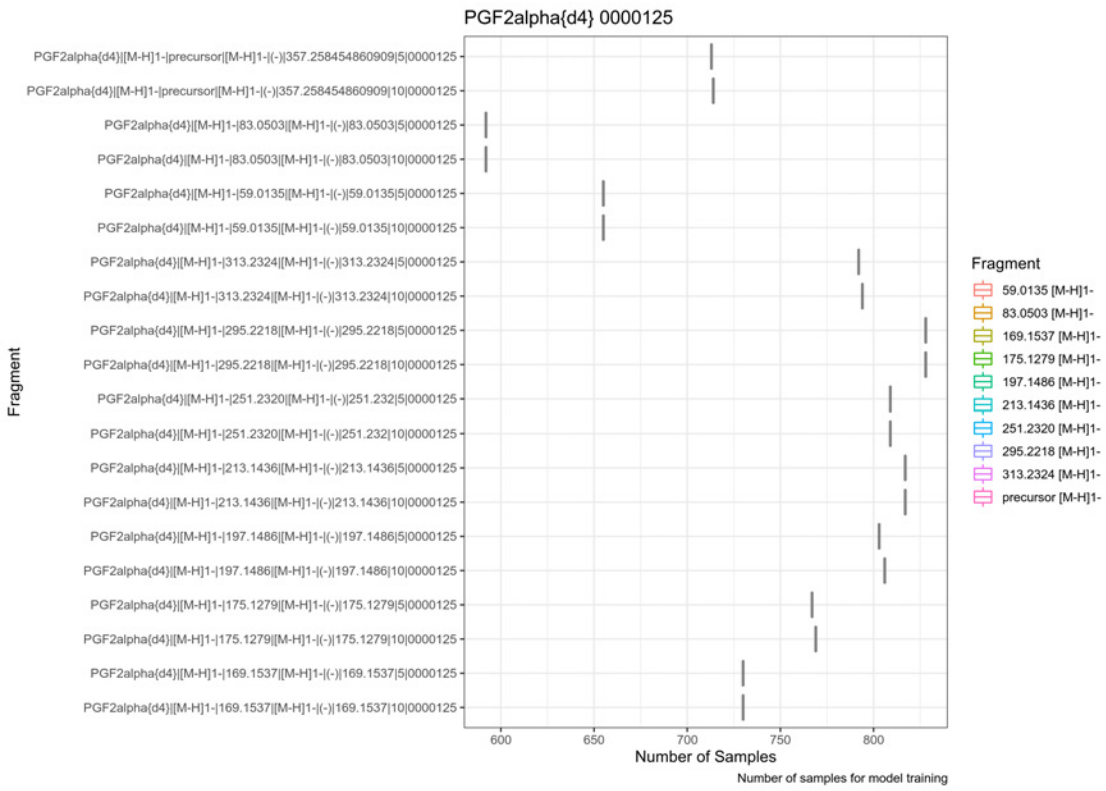

Figure 240. Number of samples used for training per combination Id

# 1.49. PGI2 [M-H]1- 0000127

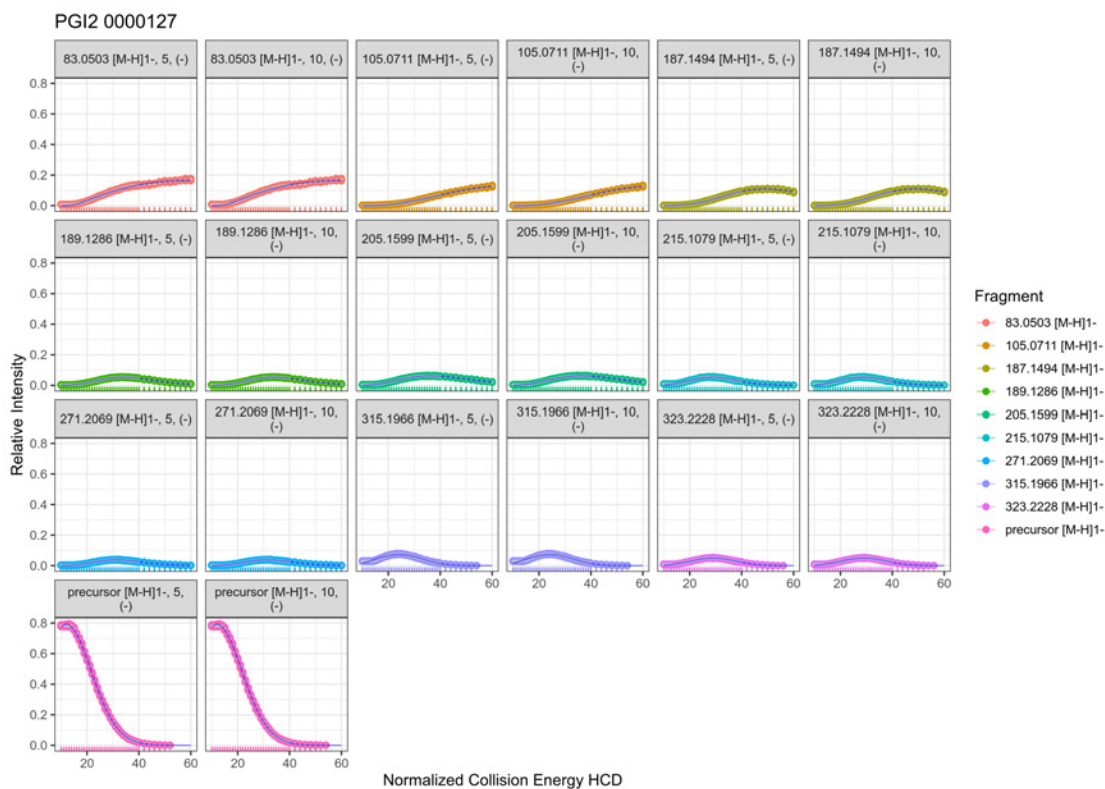

Figure 241. Nonlinear fit

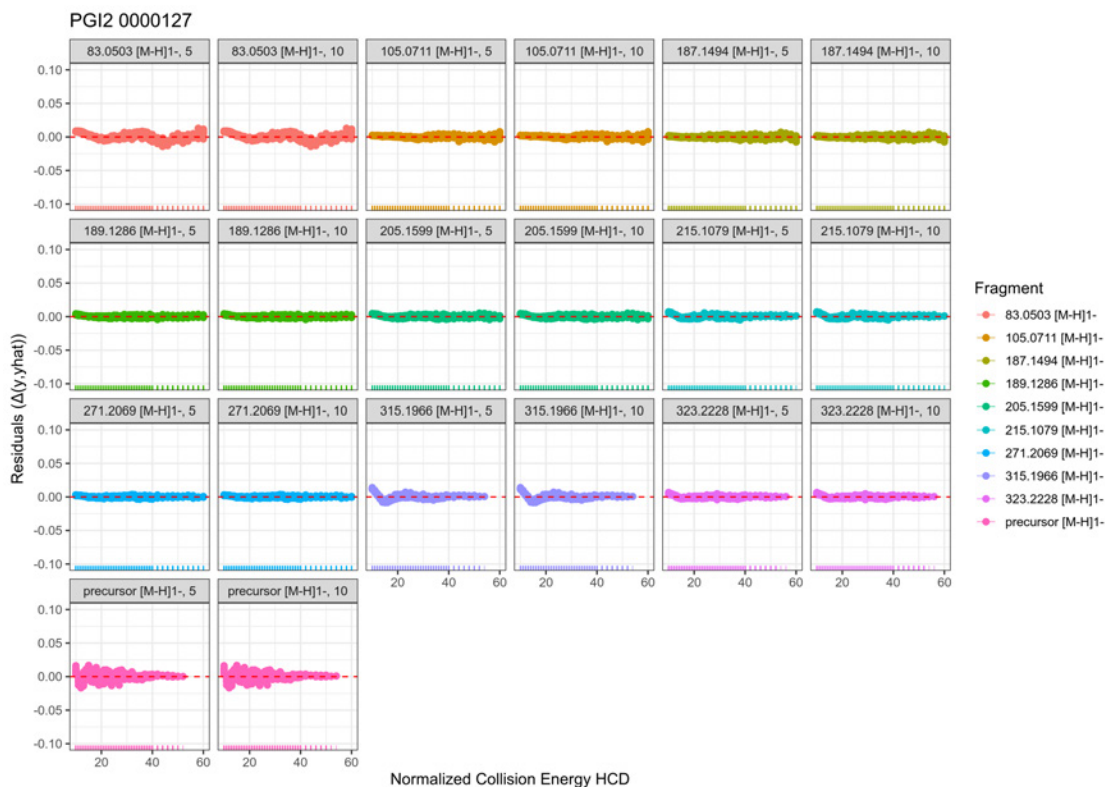

Figure 242. Residuals of nonlinear fit

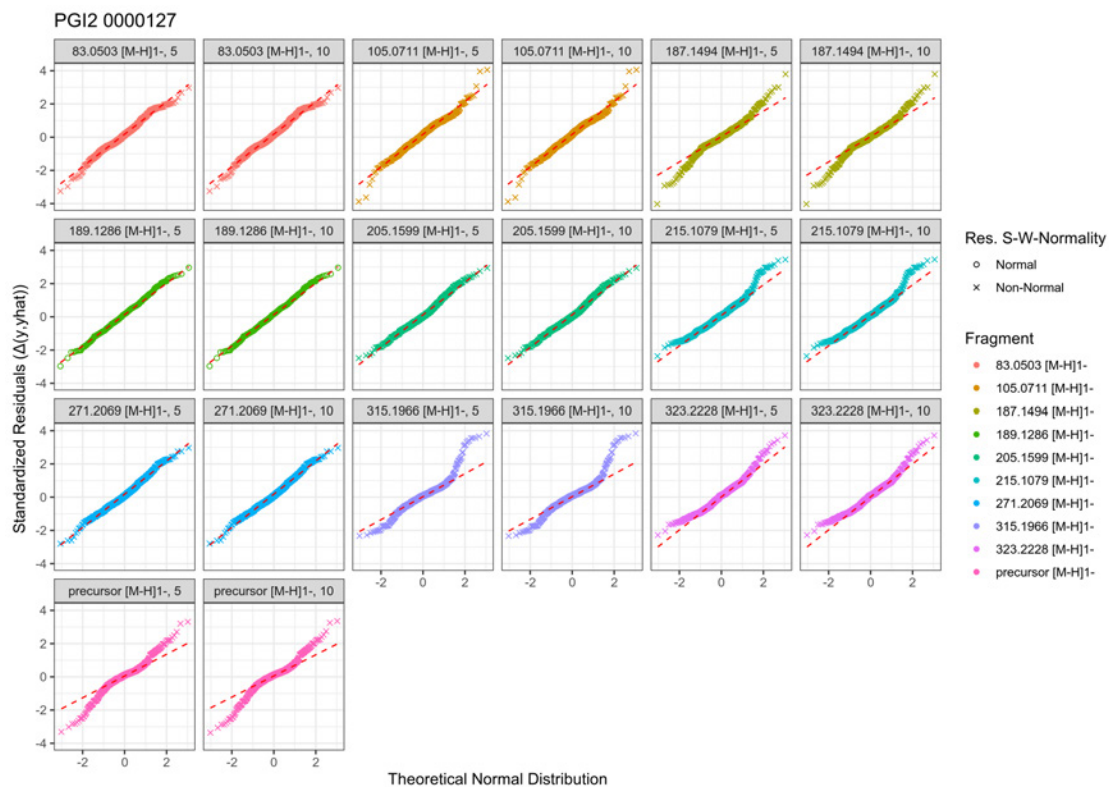

Figure 243. Quantile-quantile plot of residuals

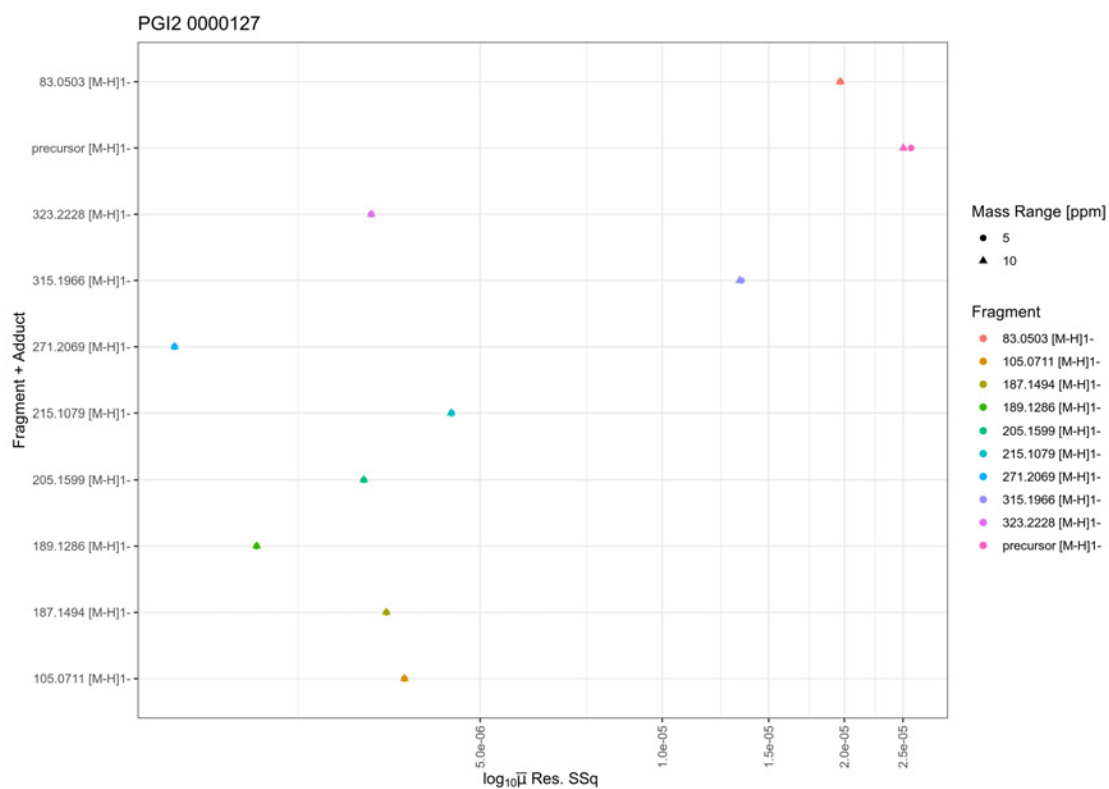

Figure 244. Normalized sum-of-squares of the residuals



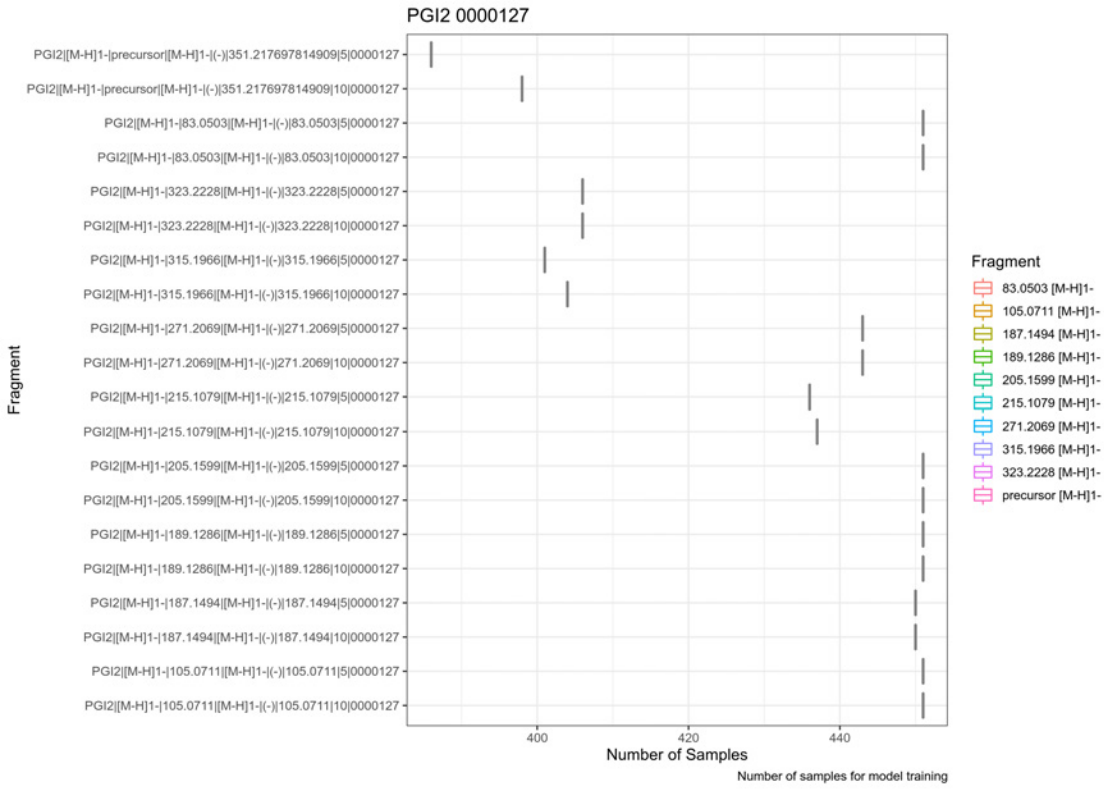

Figure 245. Number of samples used for training per combination Id

# 1.50. Resolvin D1{d5} [M-H]1- 0001333

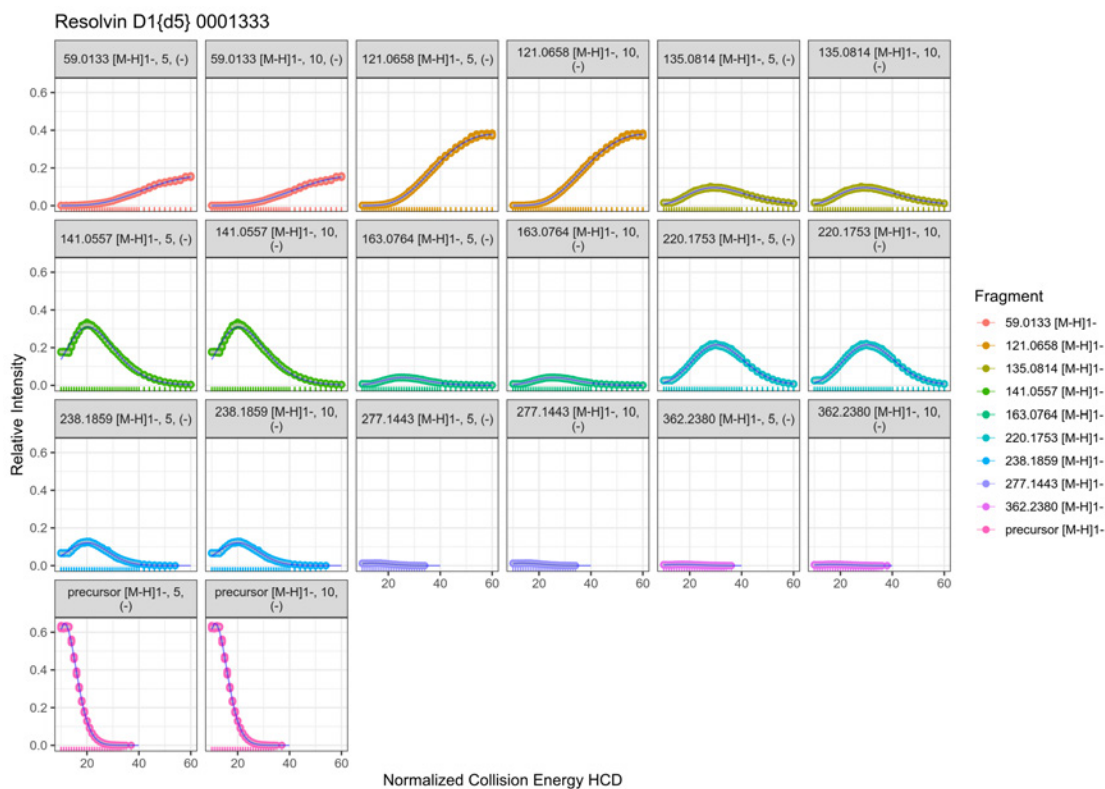

Figure 246. Nonlinear fit

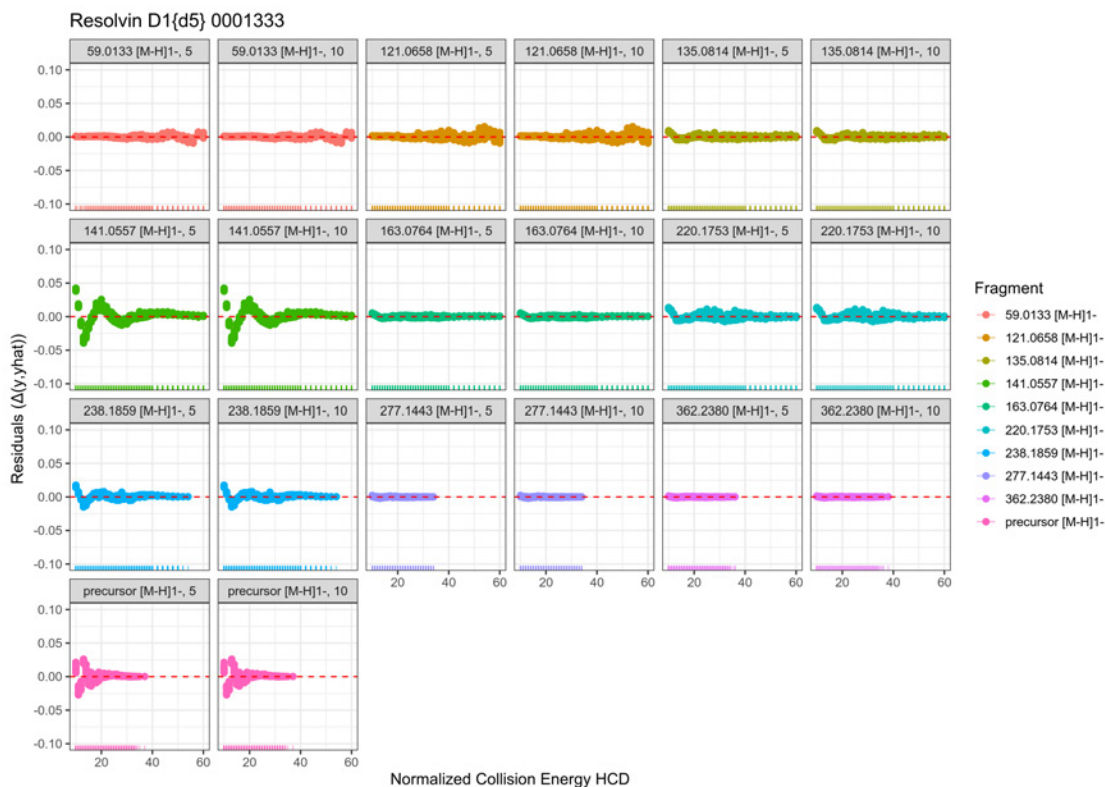

Figure 247. Residuals of nonlinear fit

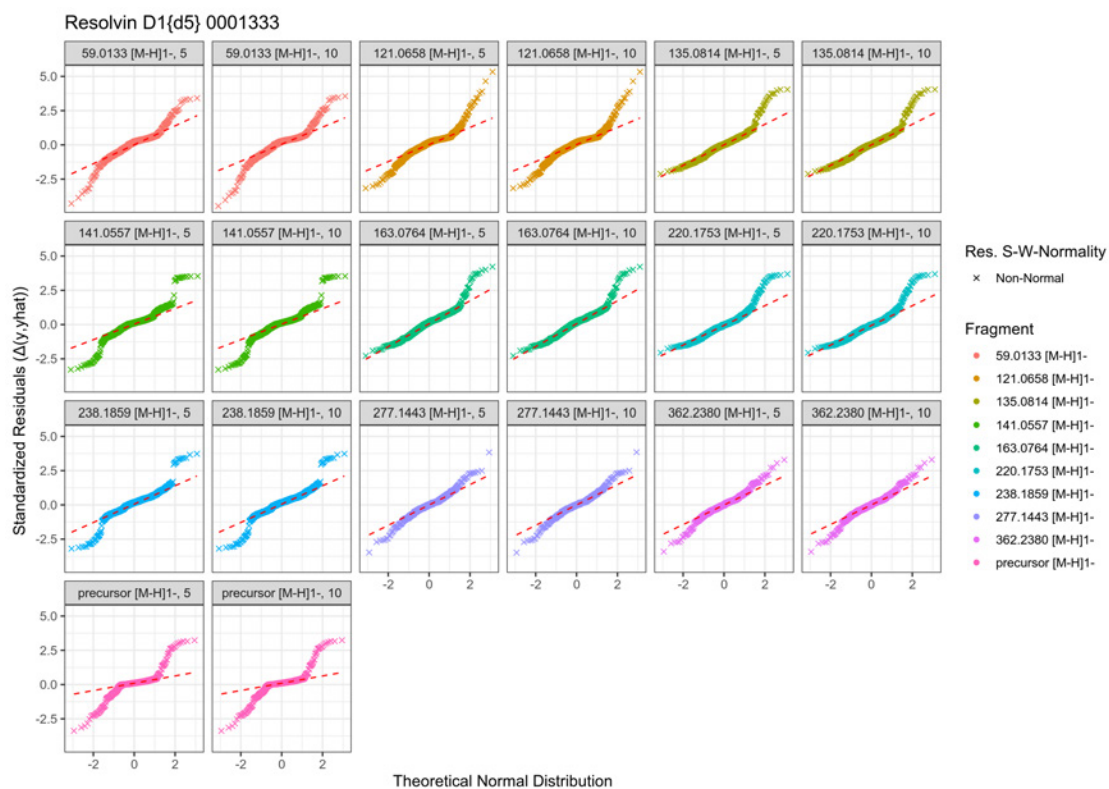

Figure 248. Quantile-quantile plot of residuals

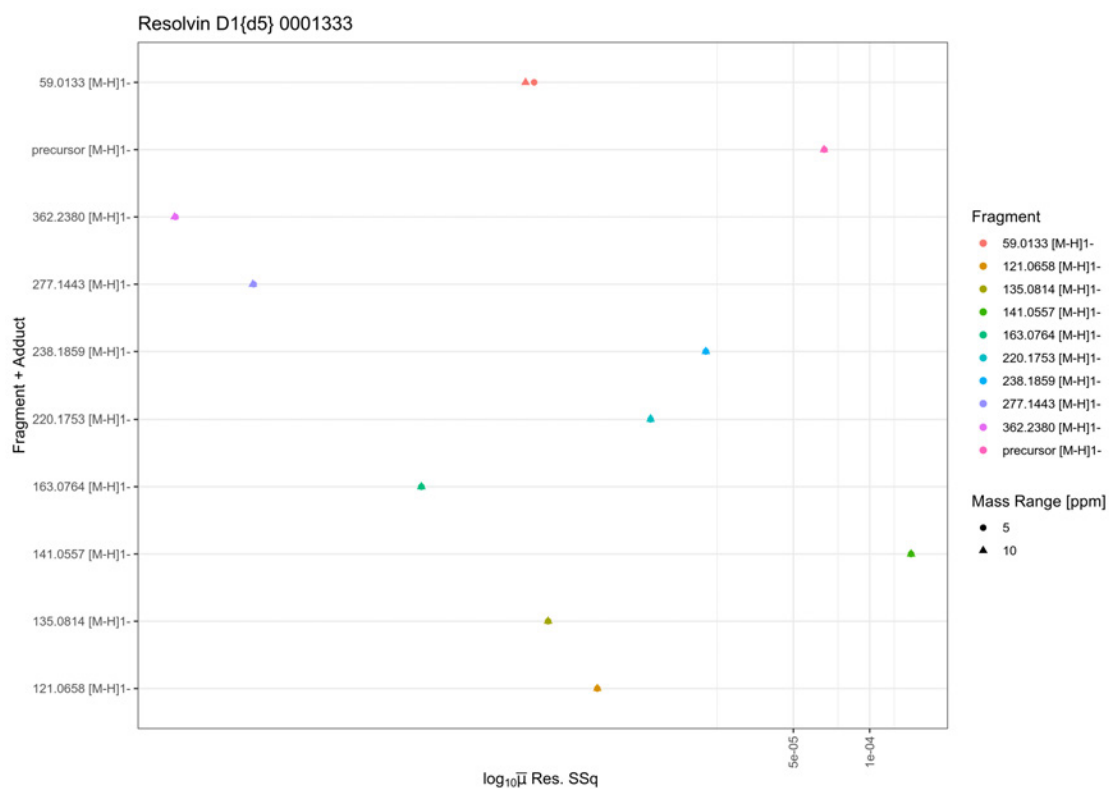

Figure 249. Normalized sum-of-squares of the residuals

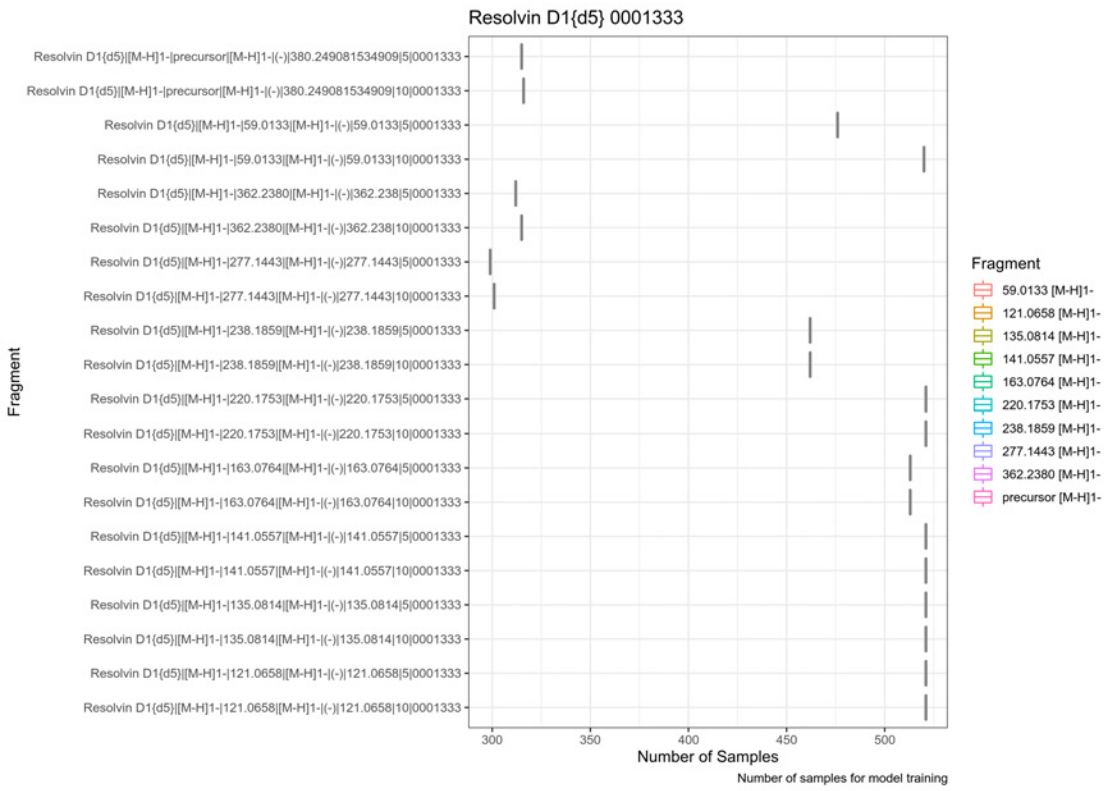

Figure 250. Number of samples used for training per combination Id

# 1.51. Resolvin D2{d5} [M-H]1- 0000129

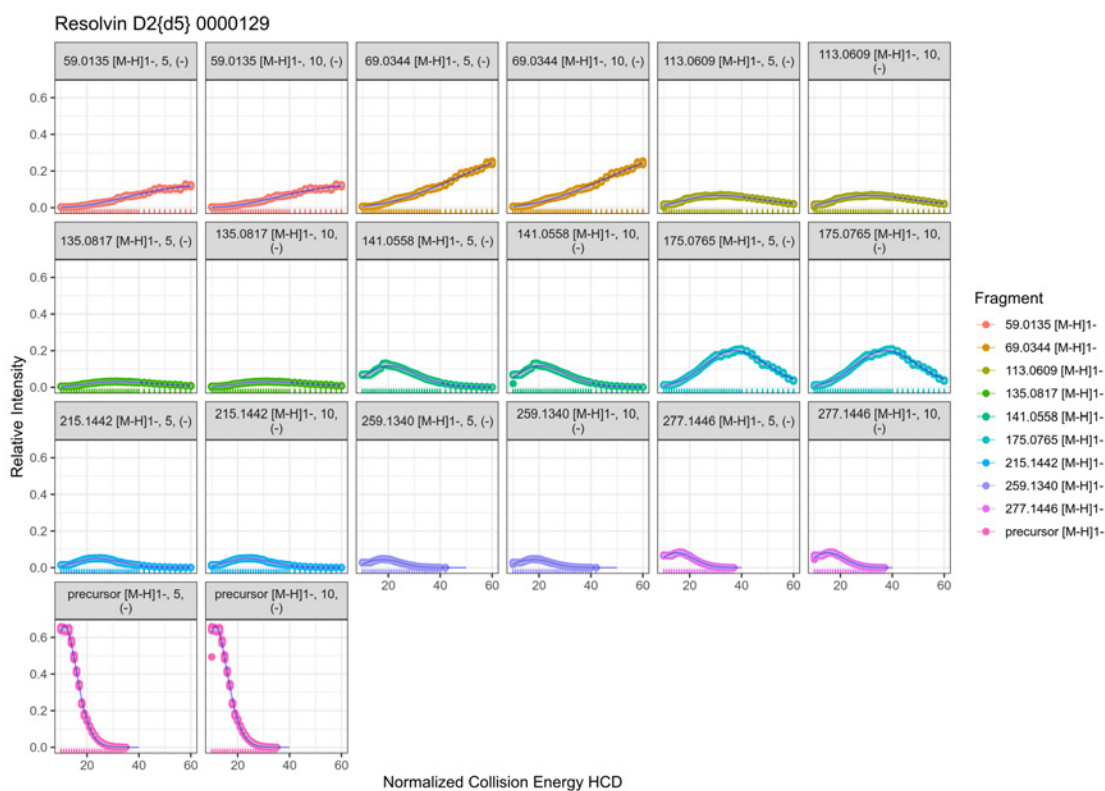

Figure 251. Nonlinear fit

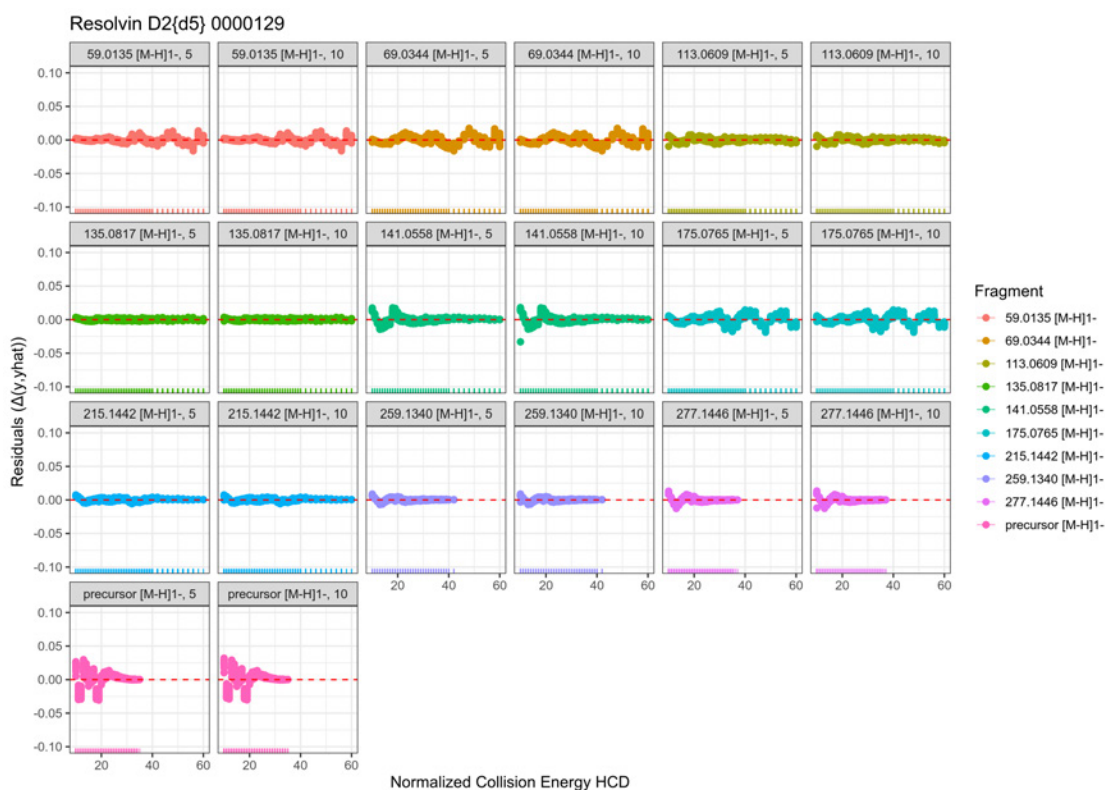

Figure 252. Residuals of nonlinear fit

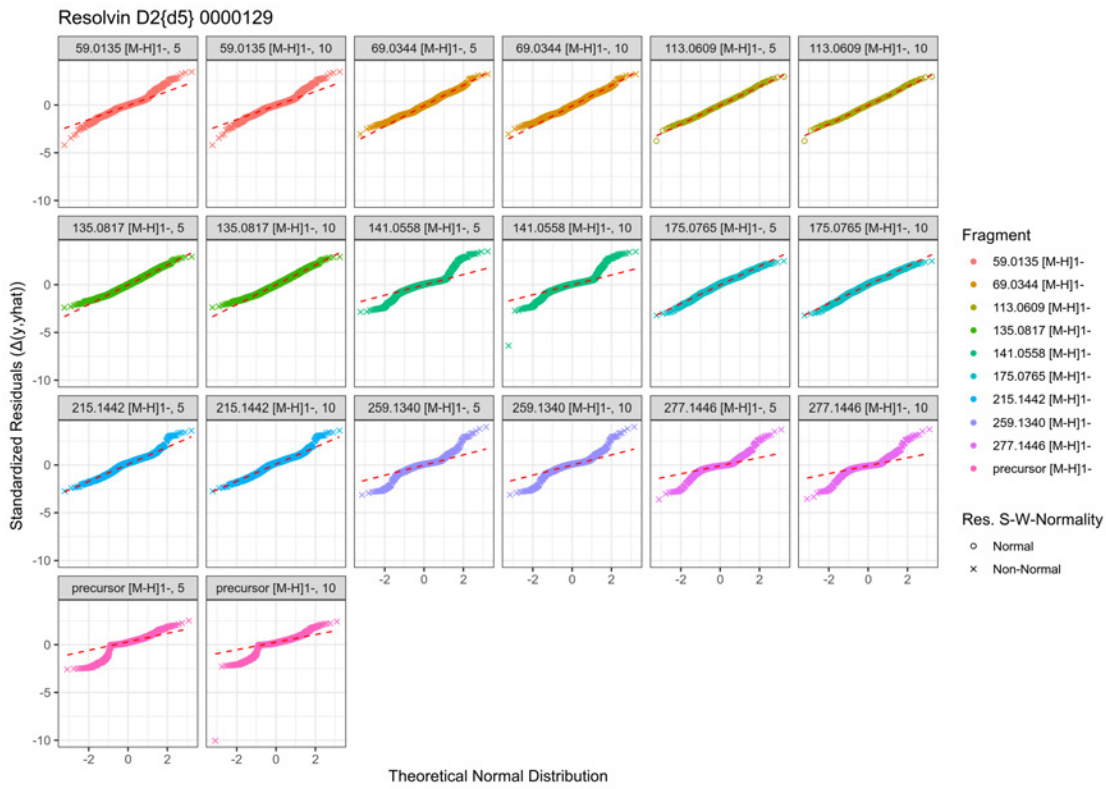

Figure 253. Quantile-quantile plot of residuals

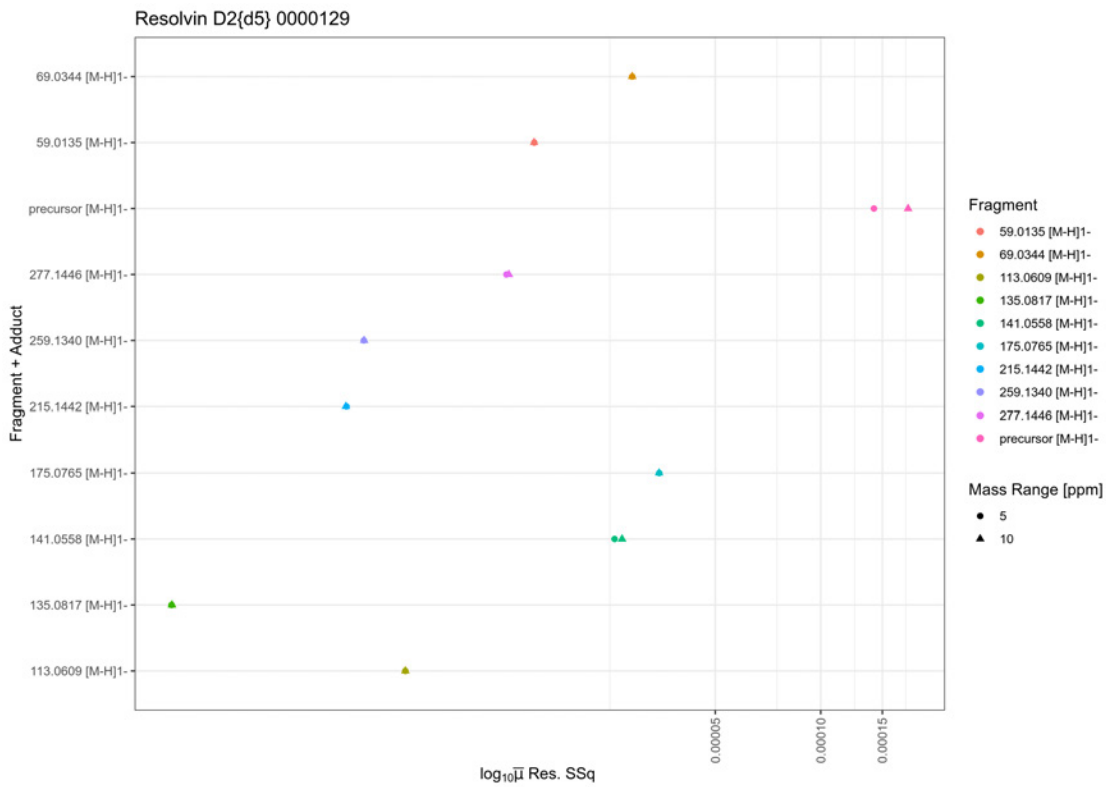

Figure 254. Normalized sum-of-squares of the residuals



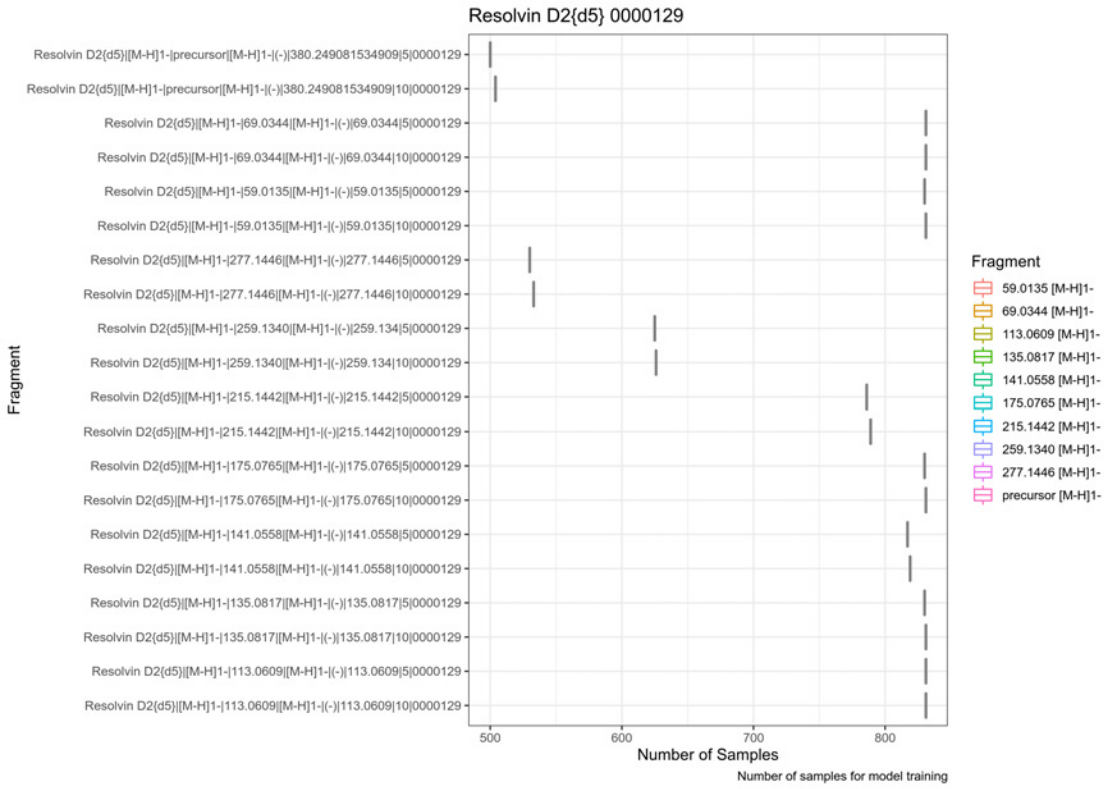

Figure 255. Number of samples used for training per combination Id

## 1.52. Resolvin D3 [M-H]1- 0000141

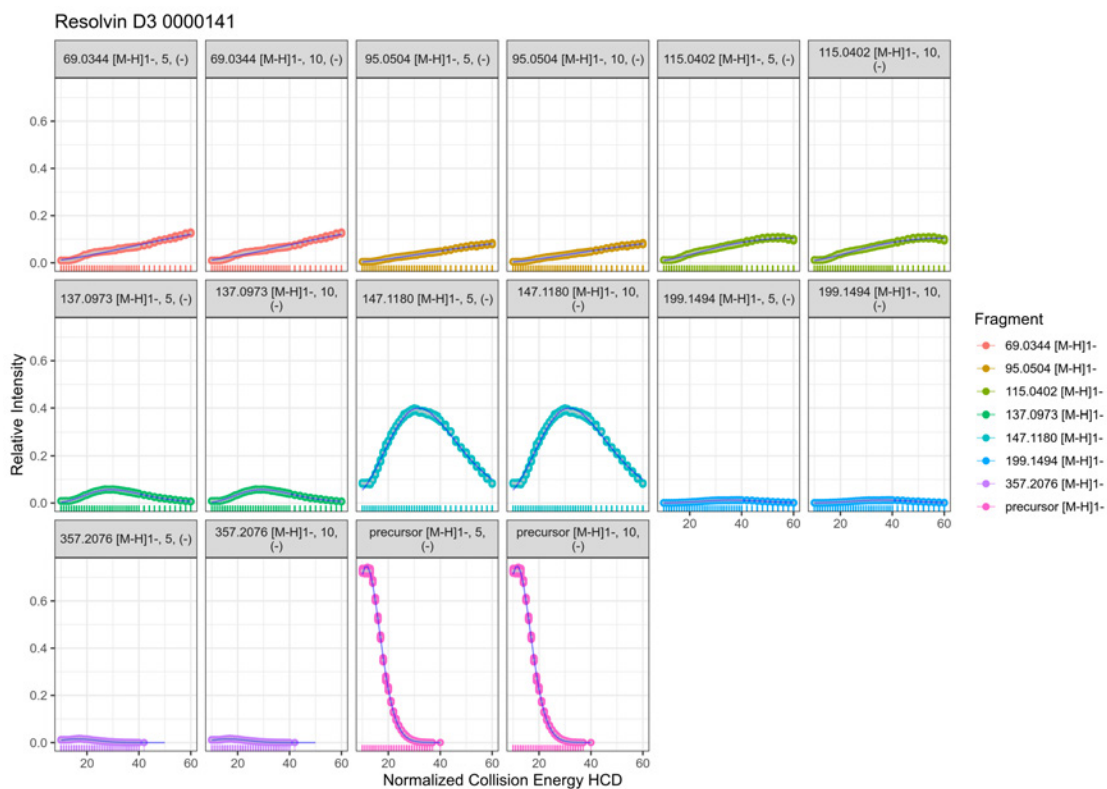

Figure 256. Nonlinear fit

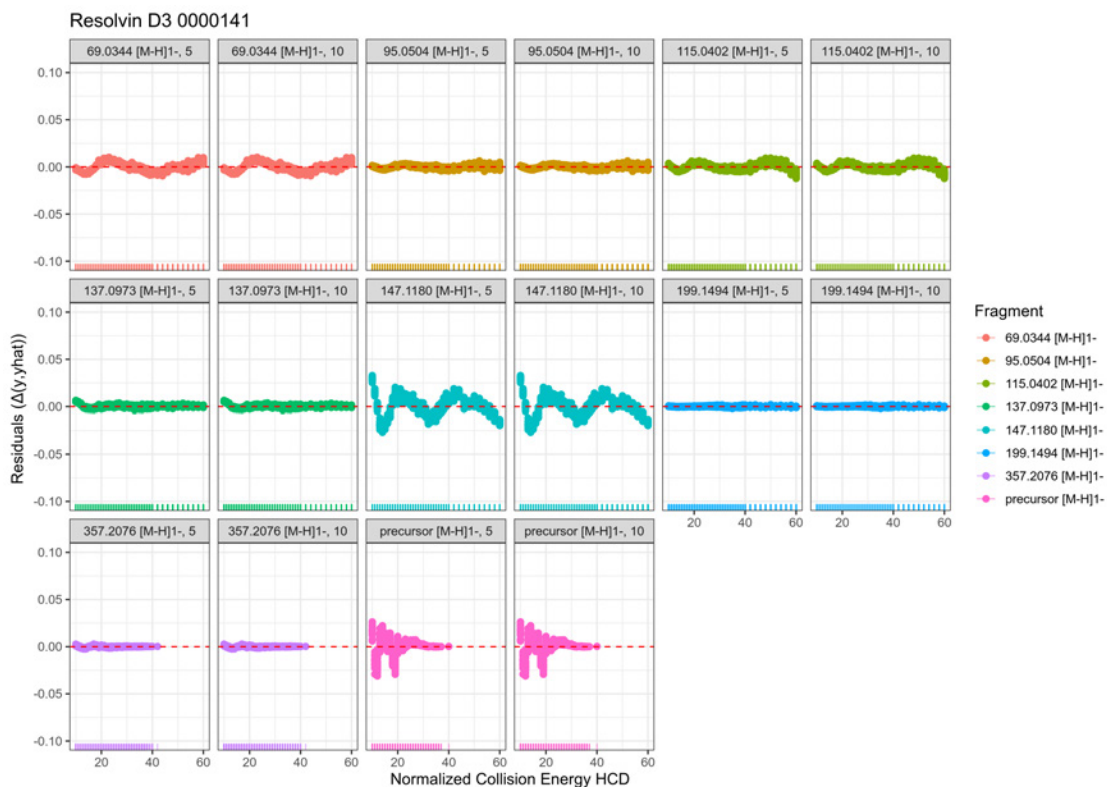

Figure 257. Residuals of nonlinear fit

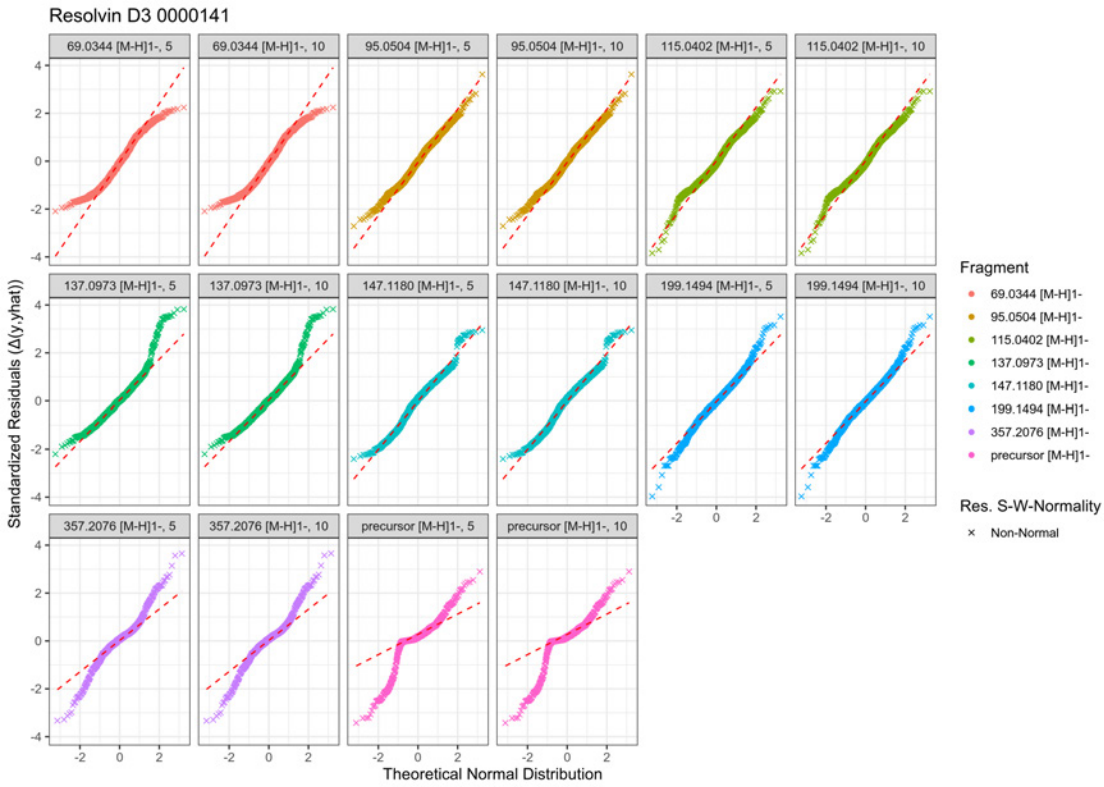

Figure 258. Quantile-quantile plot of residuals

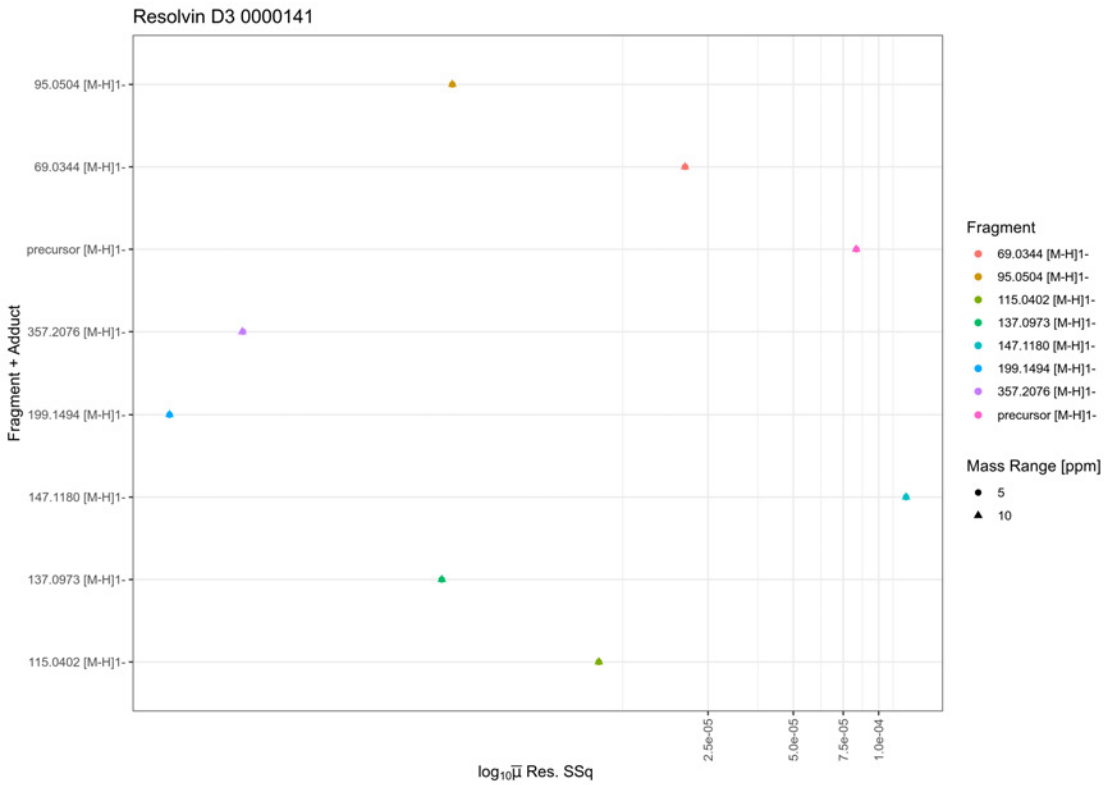

Figure 259. Normalized sum-of-squares of the residuals

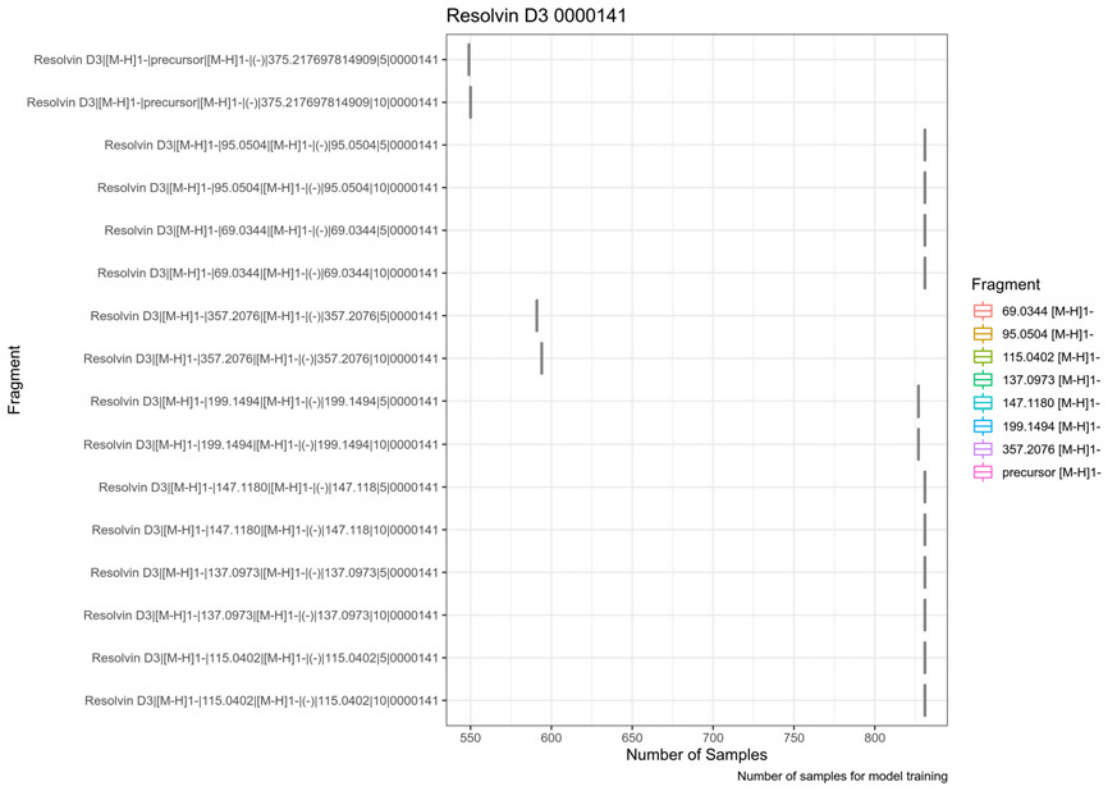

Figure 260. Number of samples used for training per combination Id

# 1.53. Resolvin D5 [M-H]1- 0000143

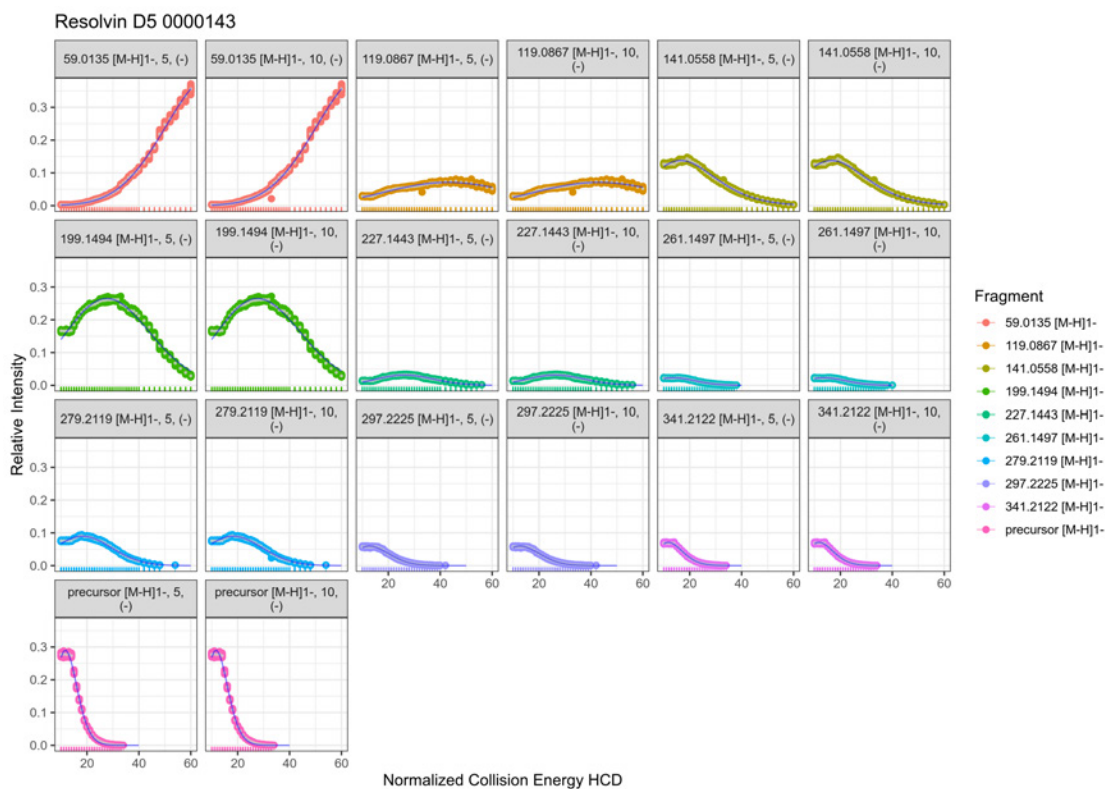

Figure 261. Nonlinear fit

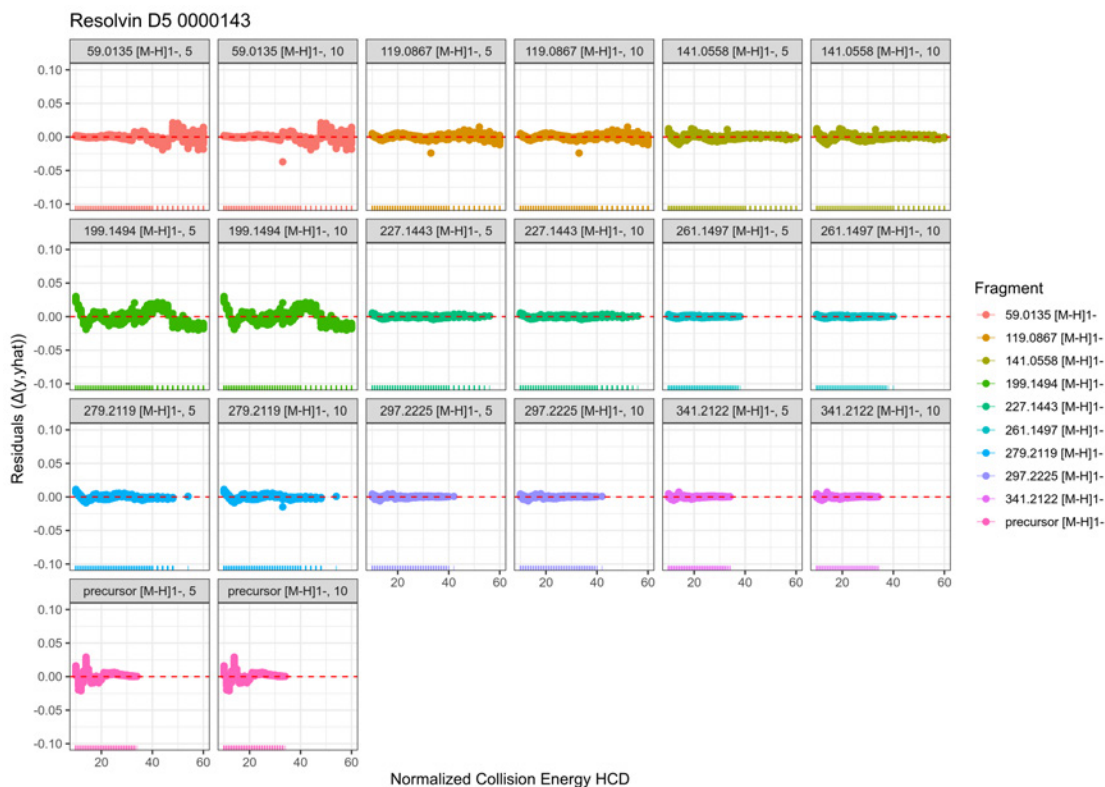

Figure 262. Residuals of nonlinear fit

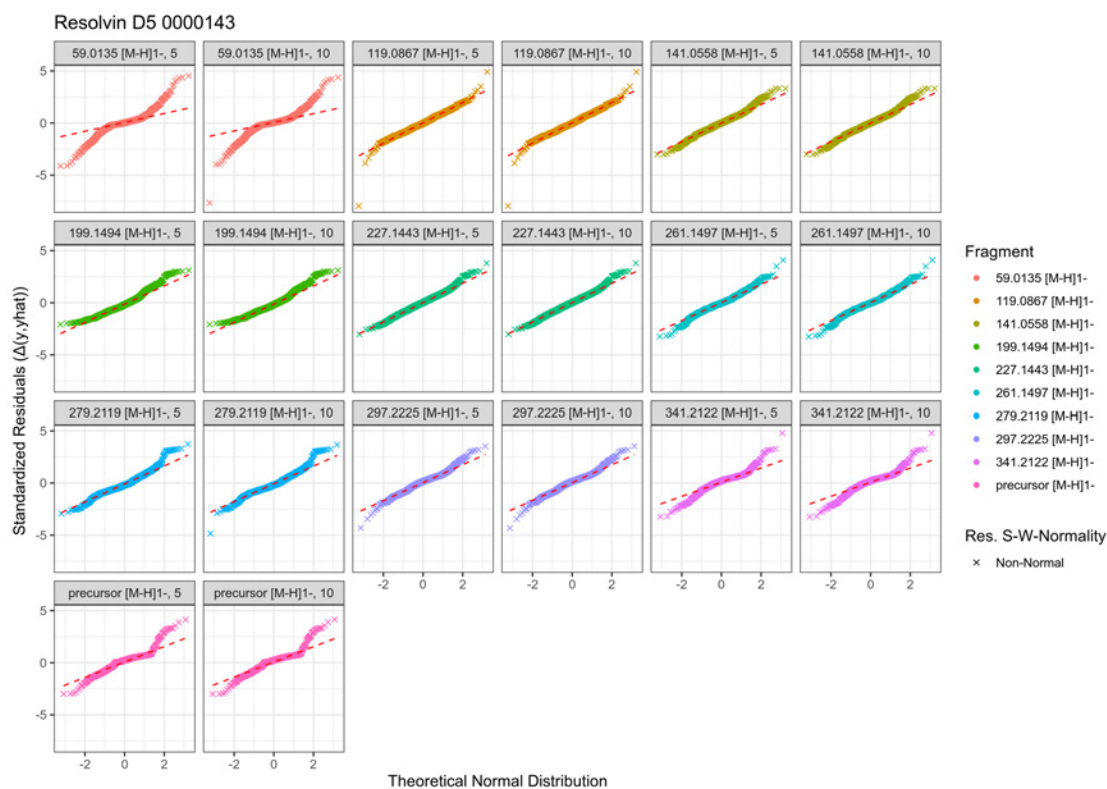

Figure 263. Quantile-quantile plot of residuals

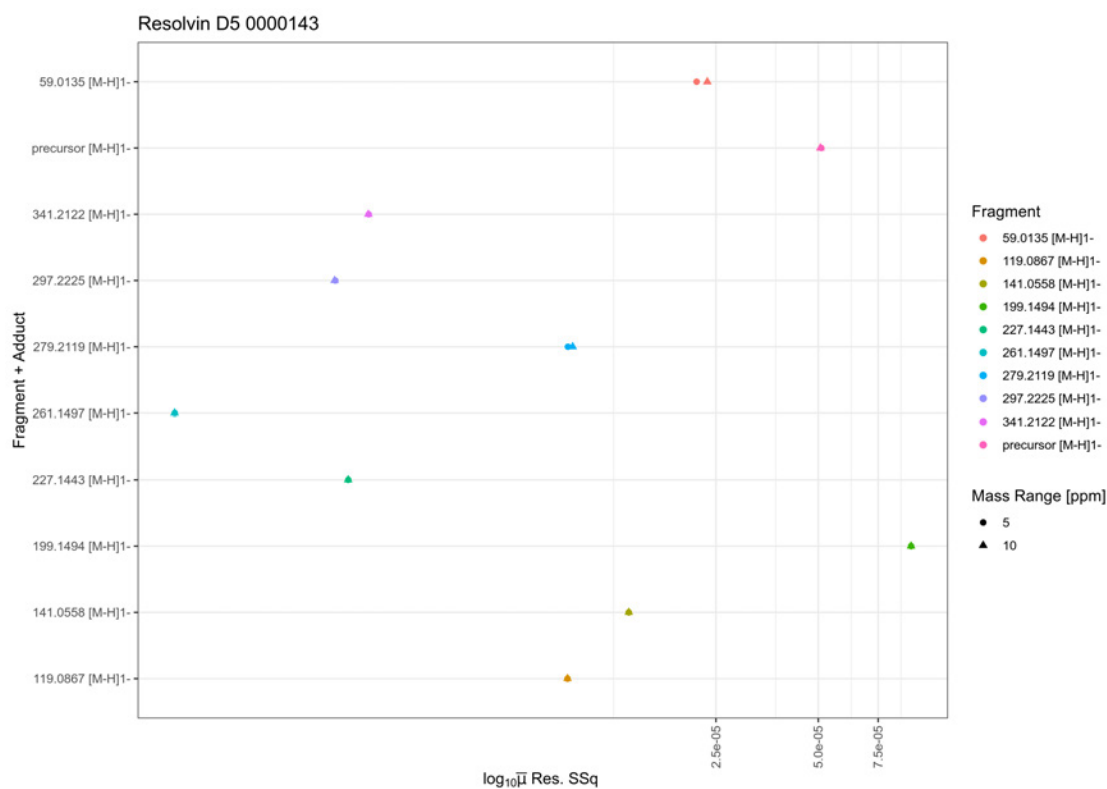

Figure 264. Normalized sum-of-squares of the residuals



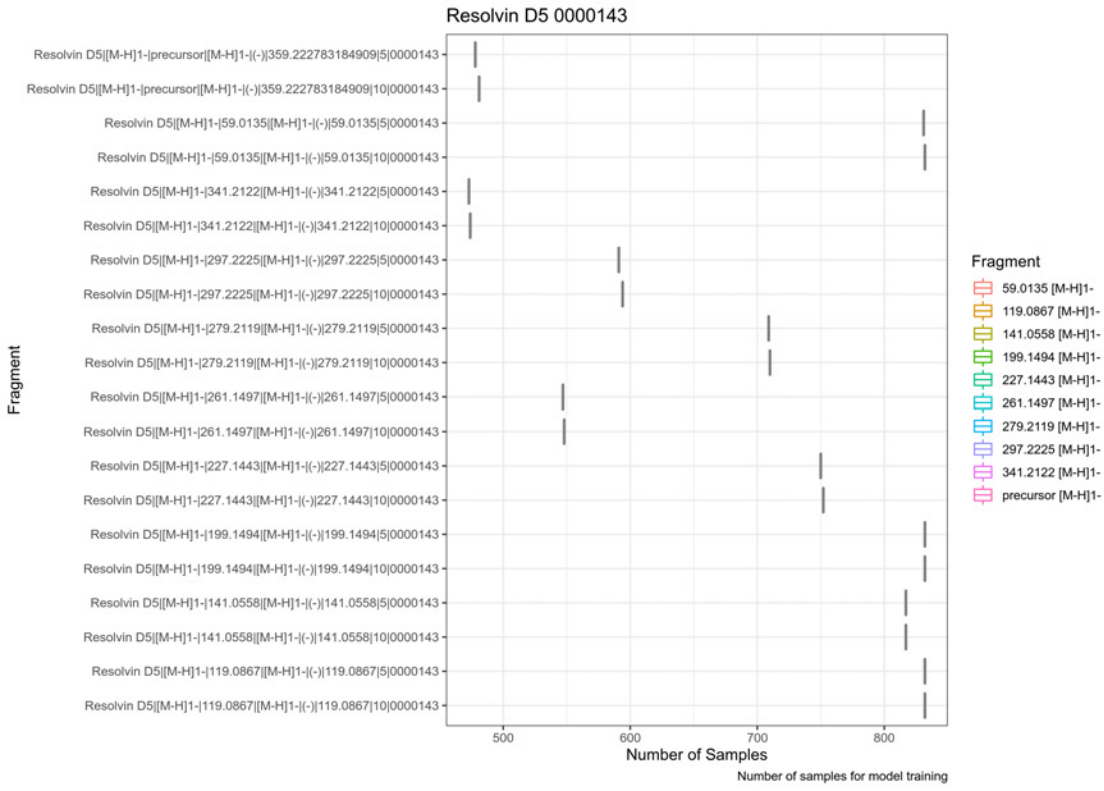

Figure 265. Number of samples used for training per combination Id

# 1.54. TXB1 [M-H]1- 0001325

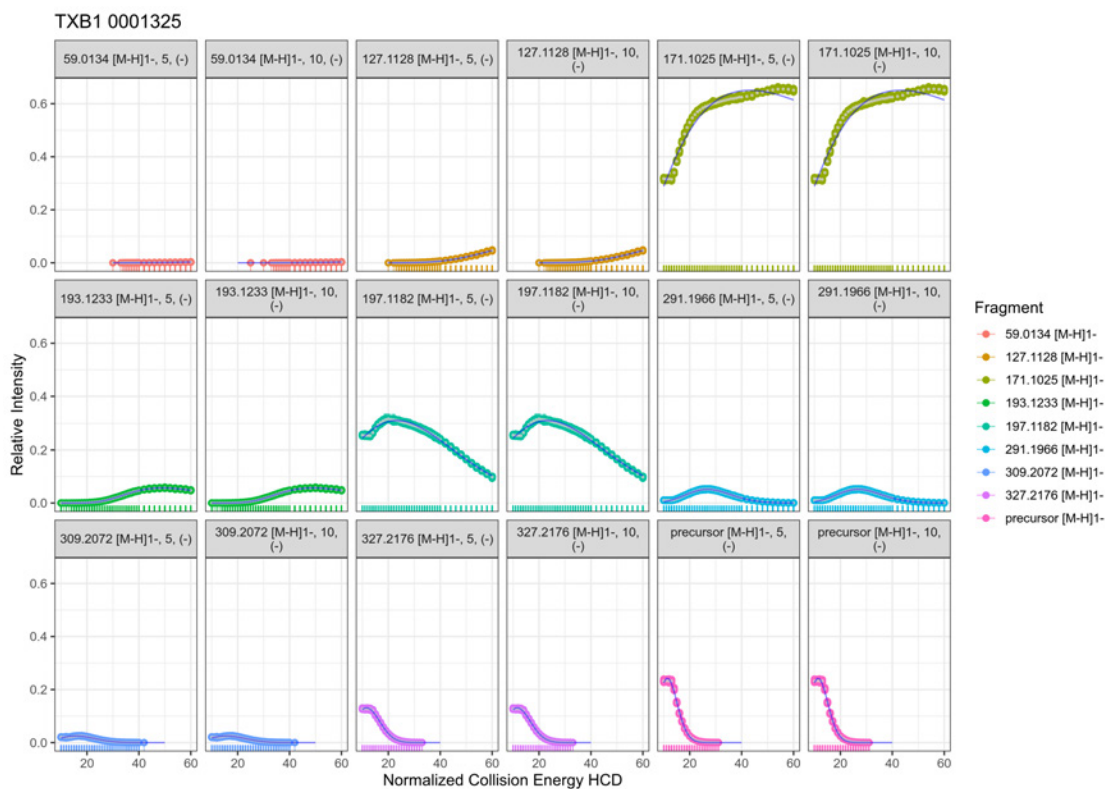

Figure 266. Nonlinear fit

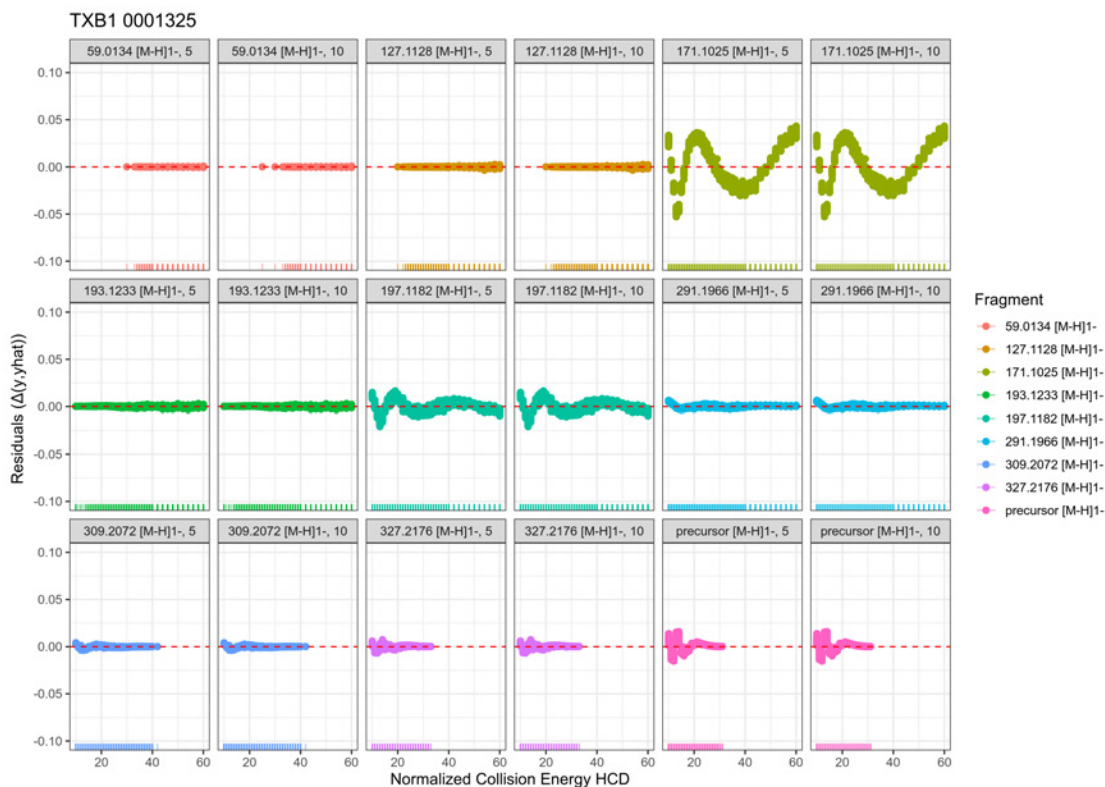

Figure 267. Residuals of nonlinear fit

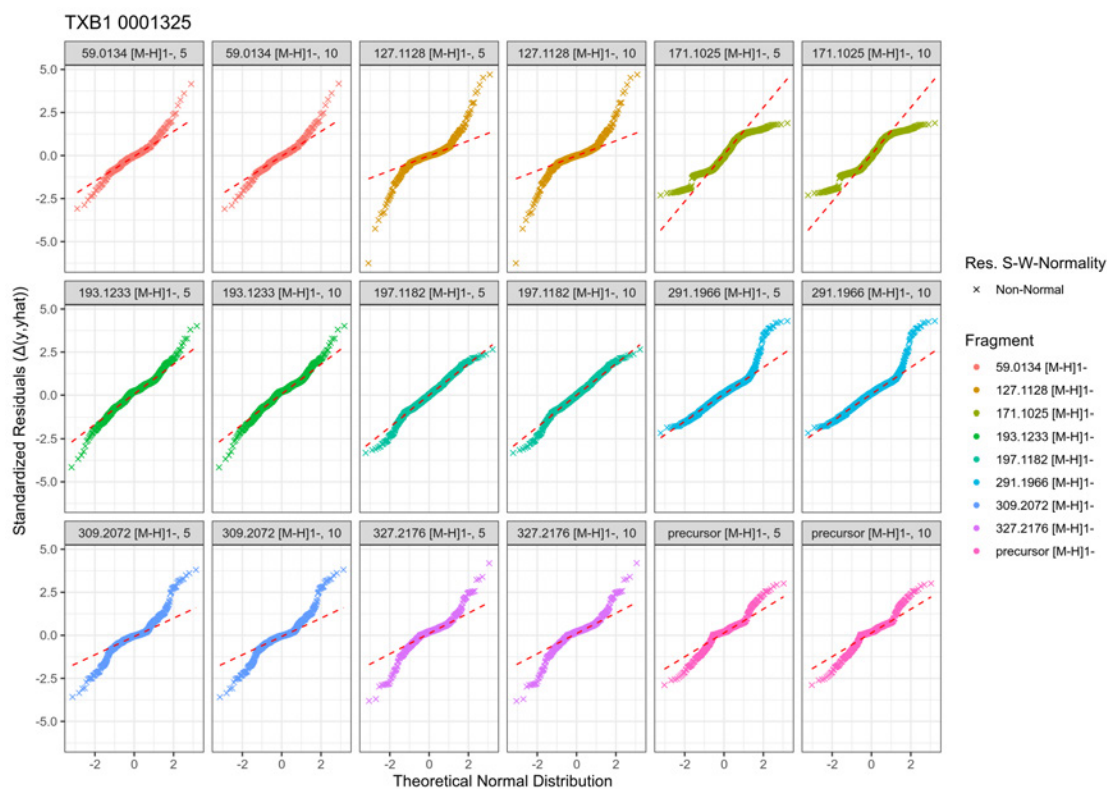

Figure 268. Quantile-quantile plot of residuals

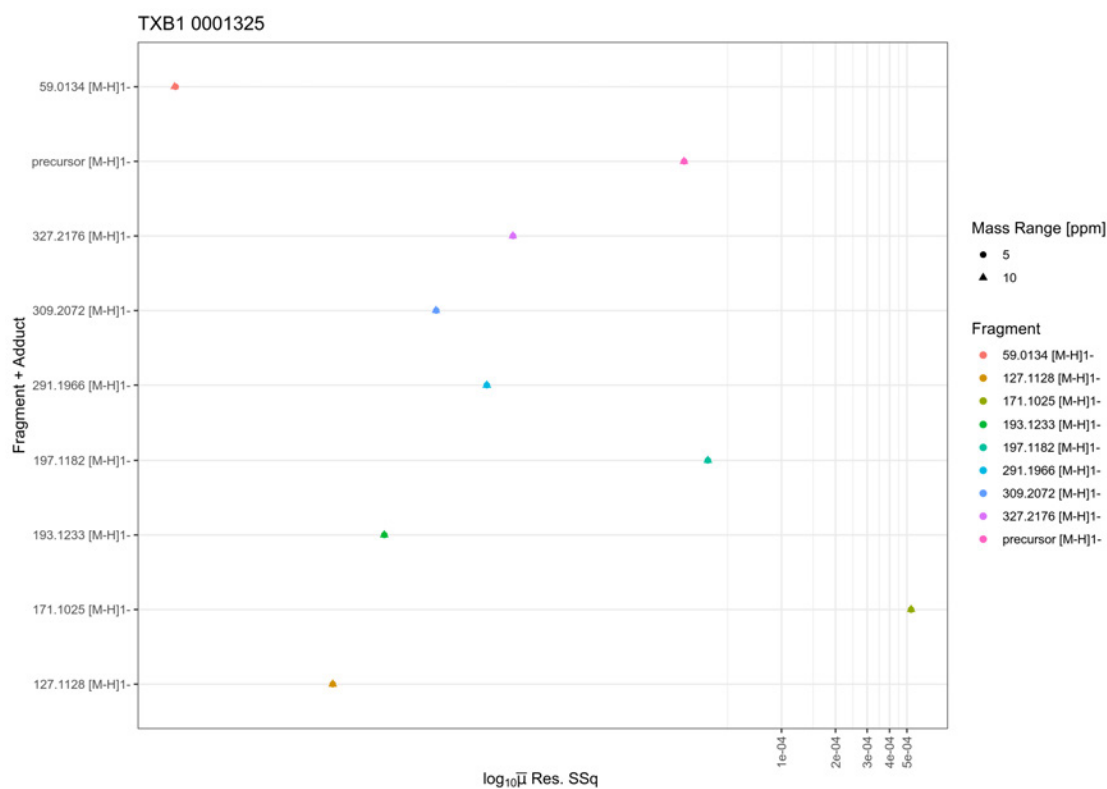

Figure 269. Normalized sum-of-squares of the residuals

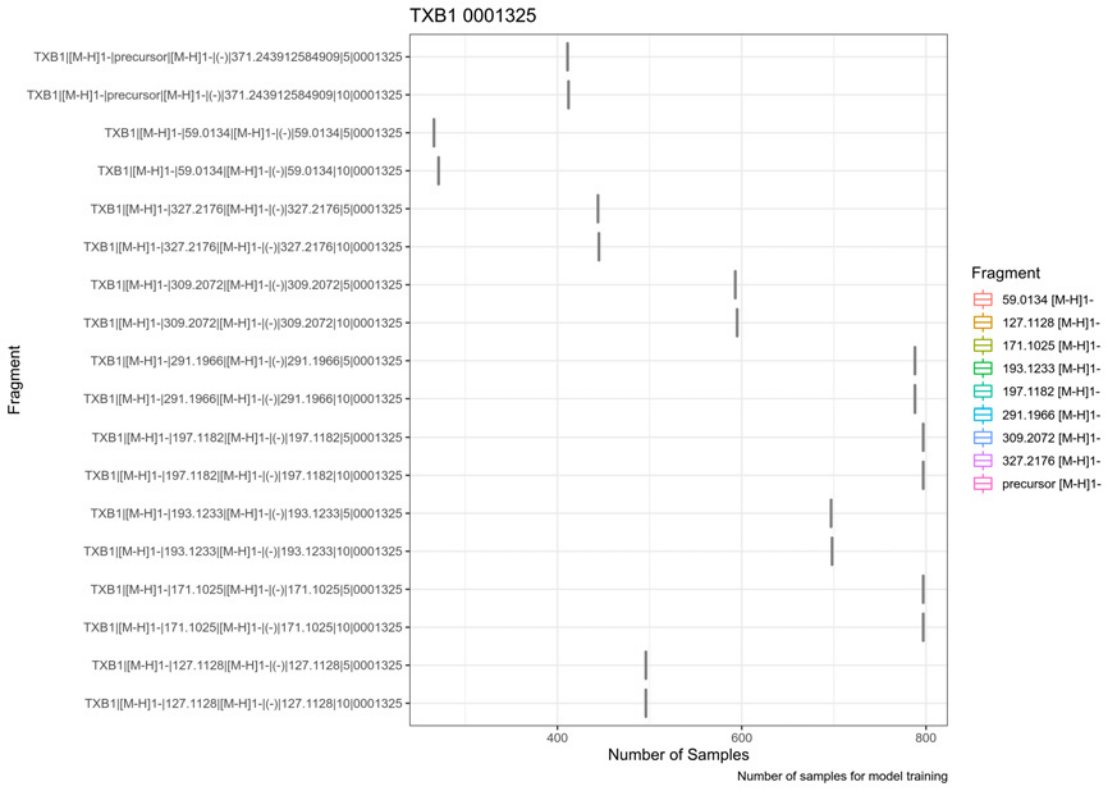

Figure 270. Number of samples used for training per combination Id

# 1.55. TXB2{d4} [M-H]1- 0001327

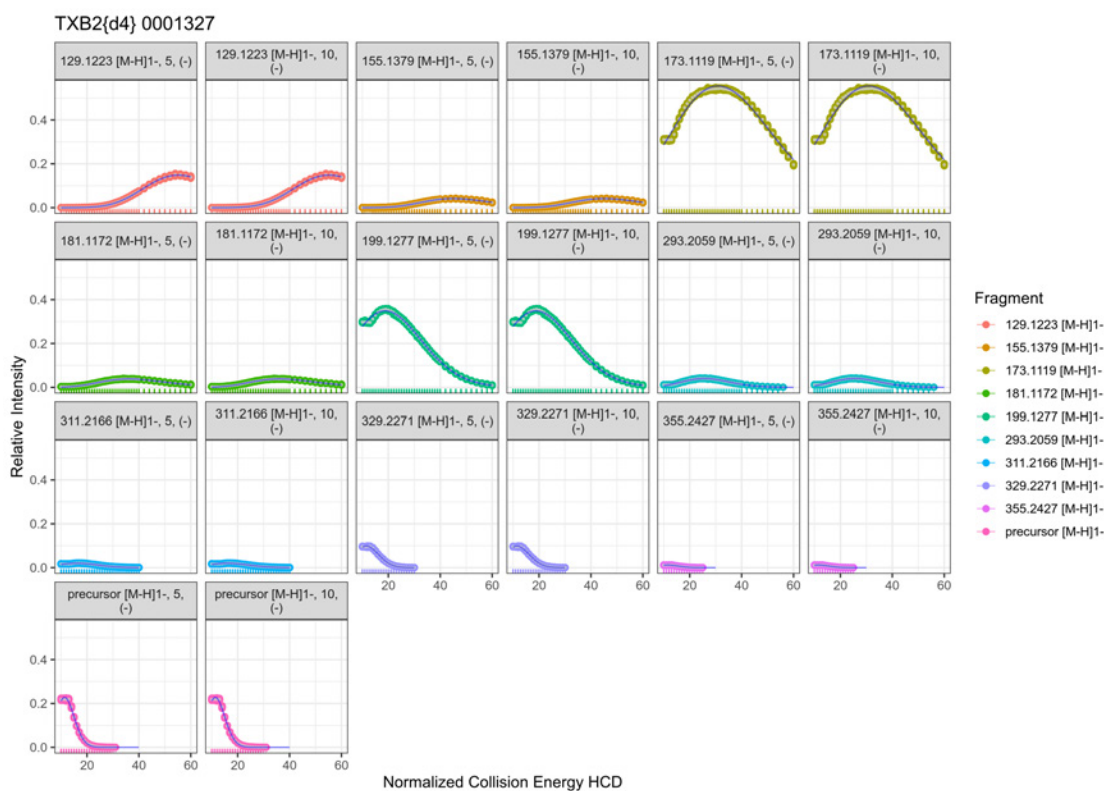

Figure 271. Nonlinear fit

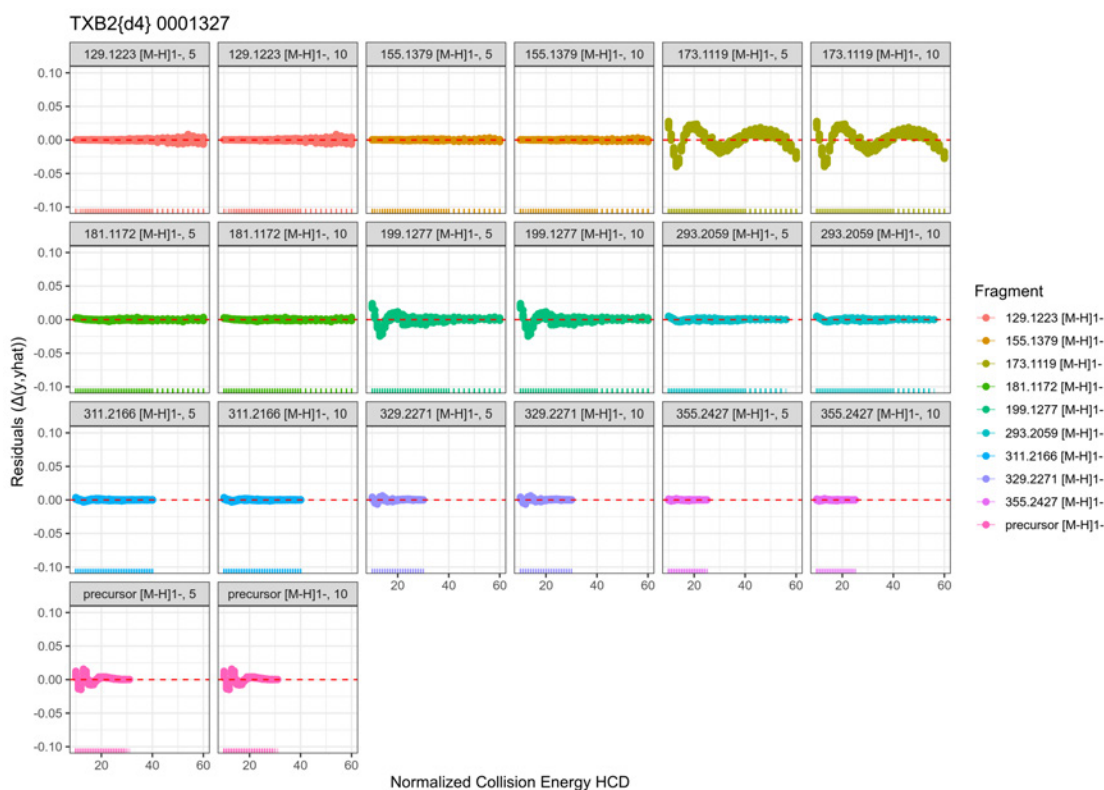

Figure 272. Residuals of nonlinear fit

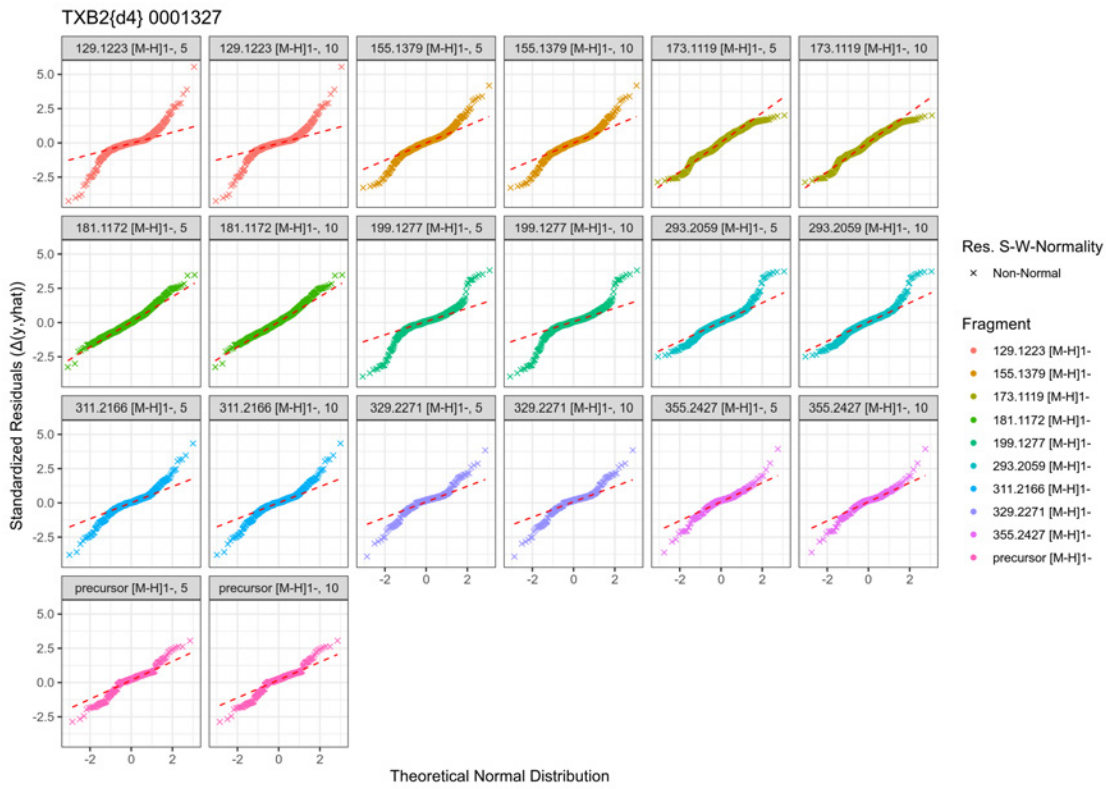

Figure 273. Quantile-quantile plot of residuals

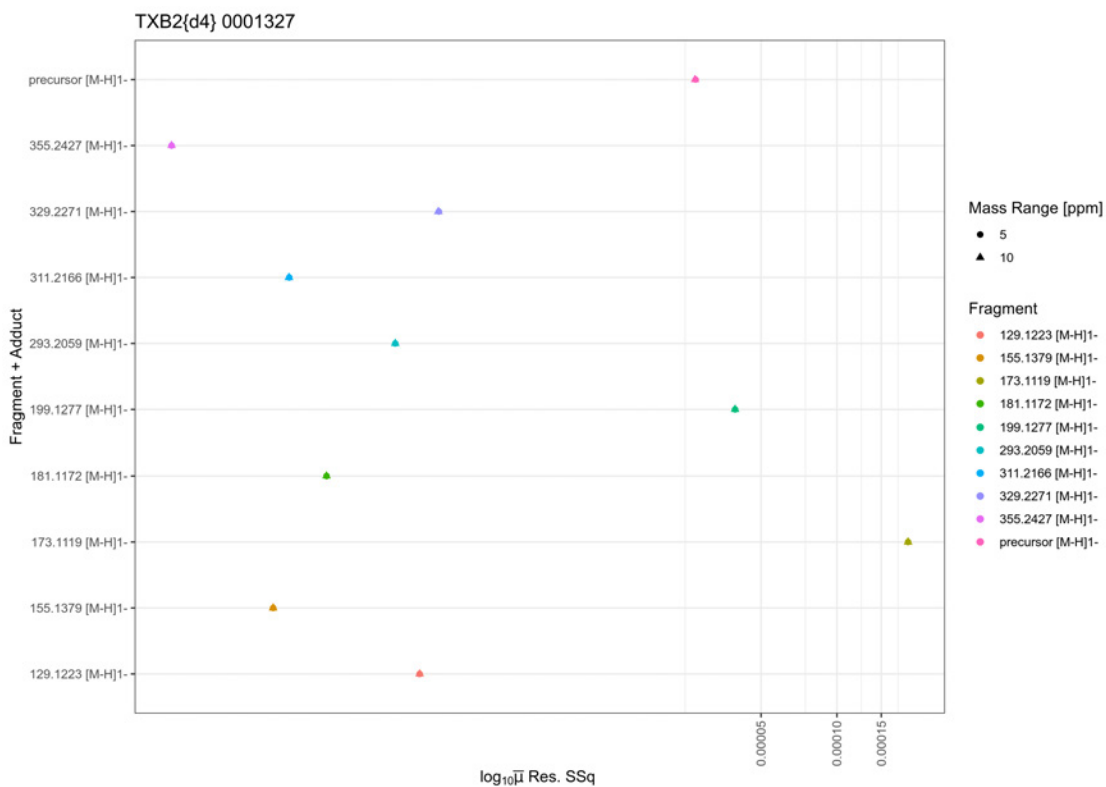

Figure 274. Normalized sum-of-squares of the residuals



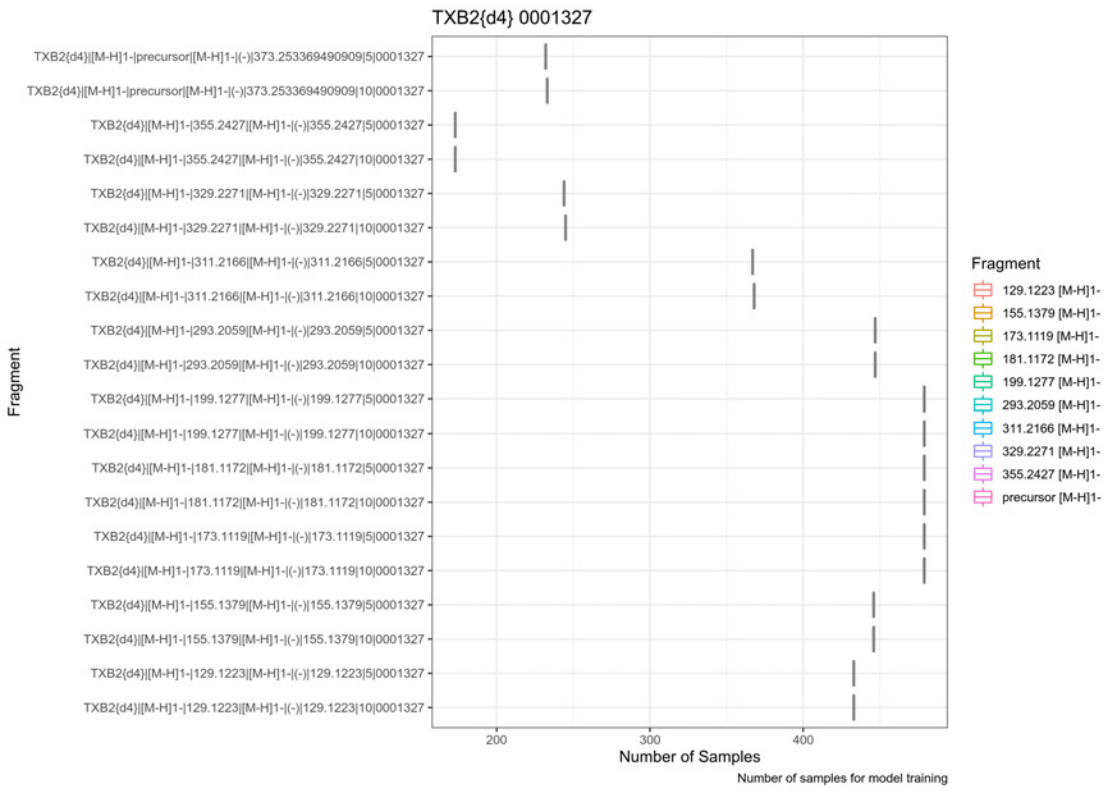

Figure 275. Number of samples used for training per combination Id

# 1.56. TXB3 [M-H]1- 0001323

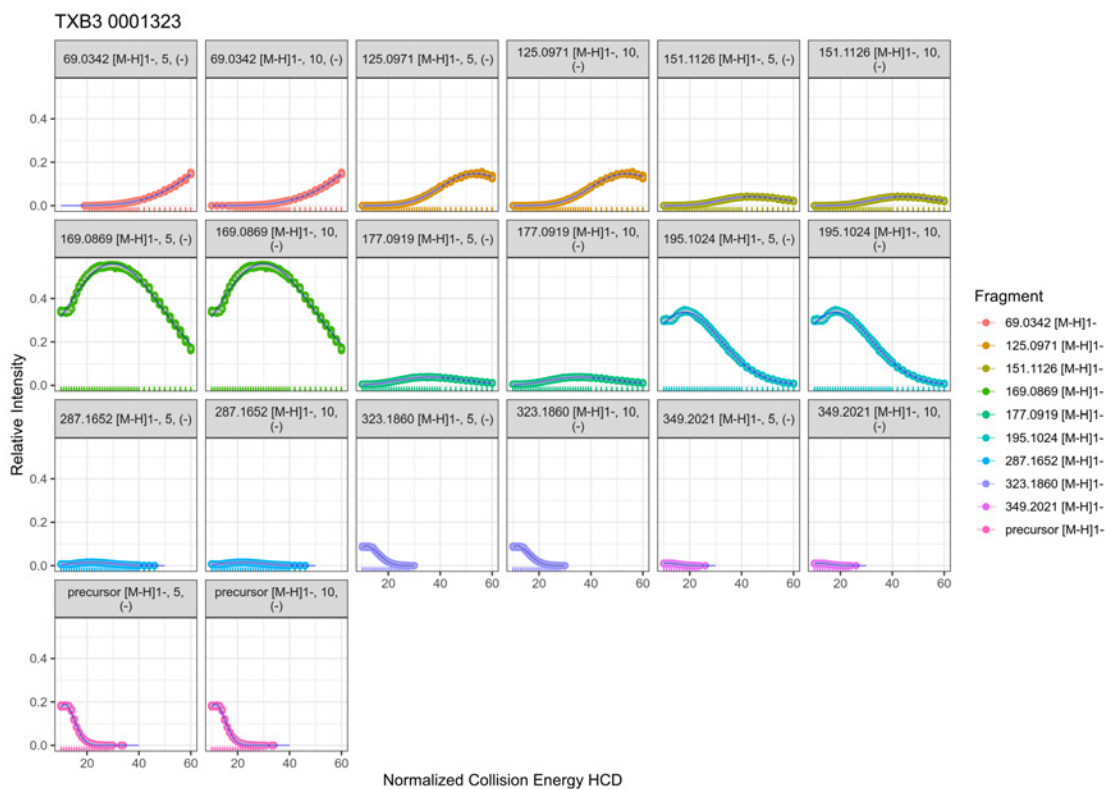

Figure 276. Nonlinear fit

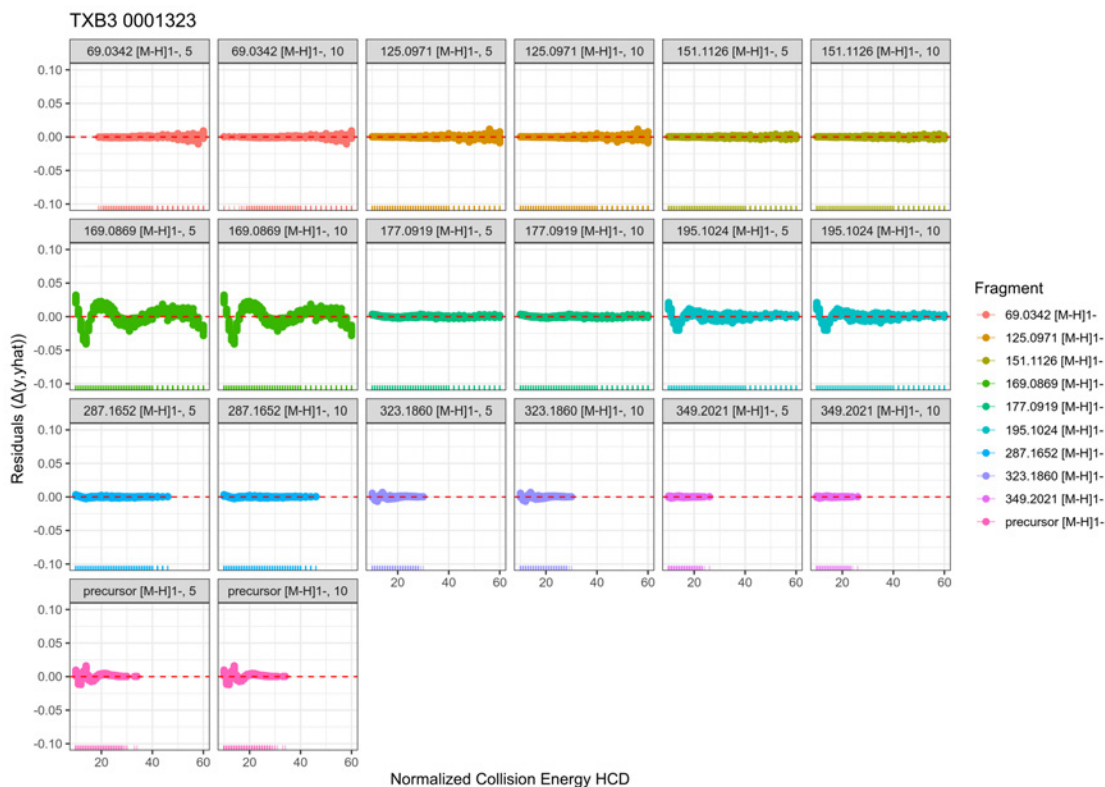

Figure 277. Residuals of nonlinear fit

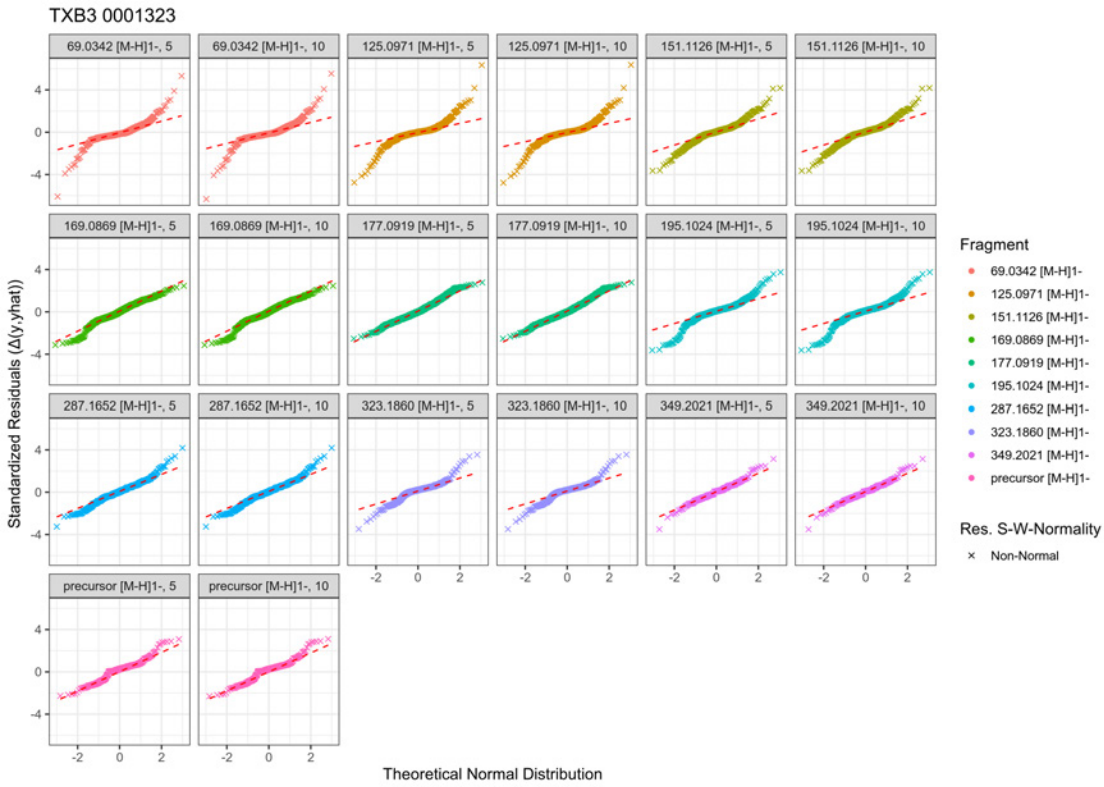

Figure 278. Quantile-quantile plot of residuals

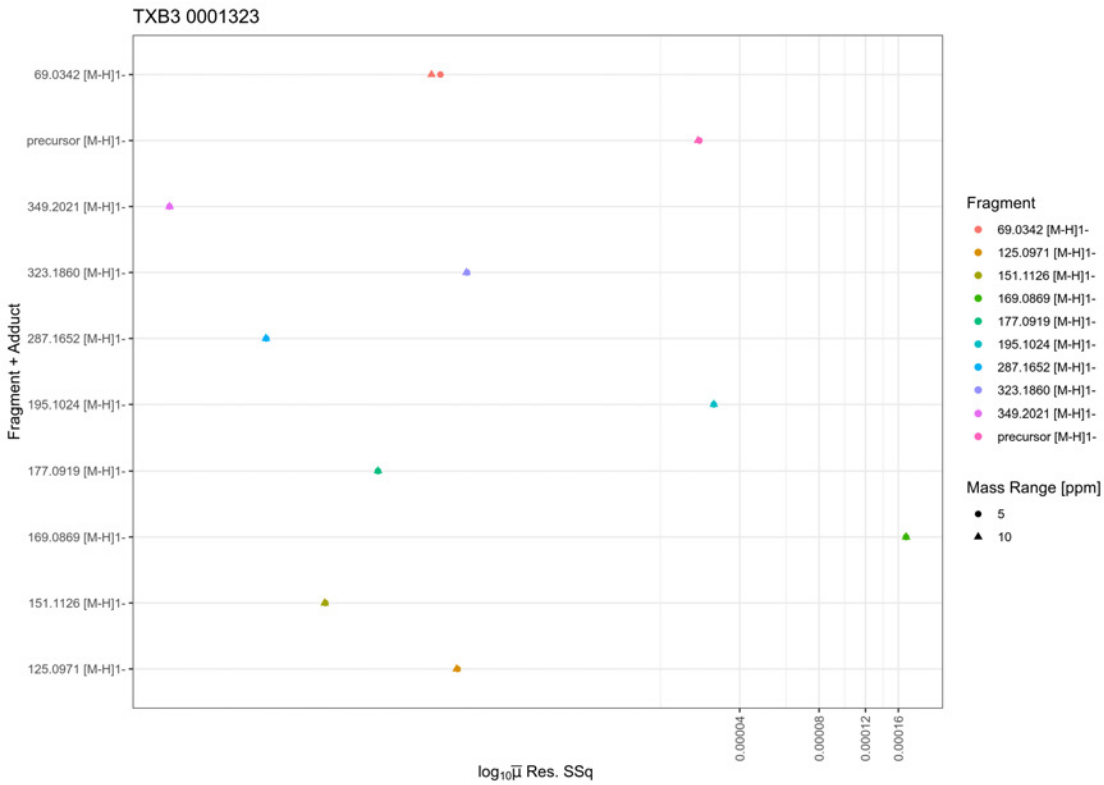

Figure 279. Normalized sum-of-squares of the residuals

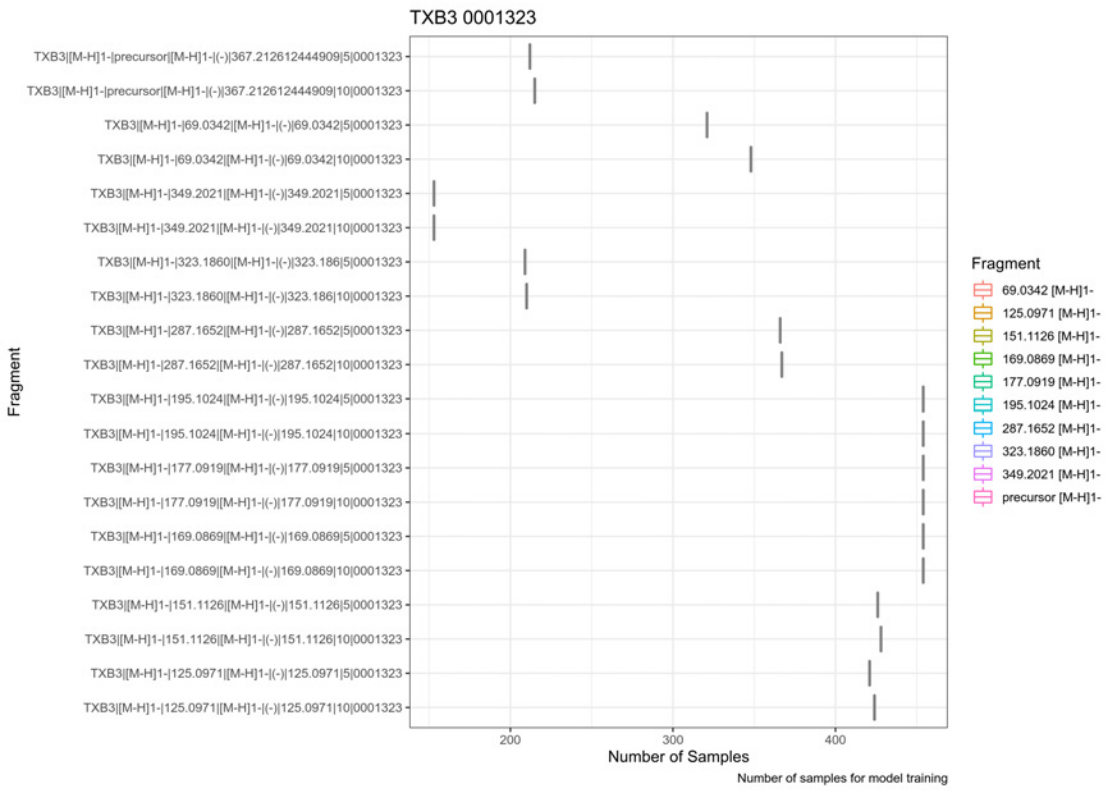

Figure 280. Number of samples used for training per combination Id

# 1.57. alpha-LA{d14} [M-H]1- 0000135

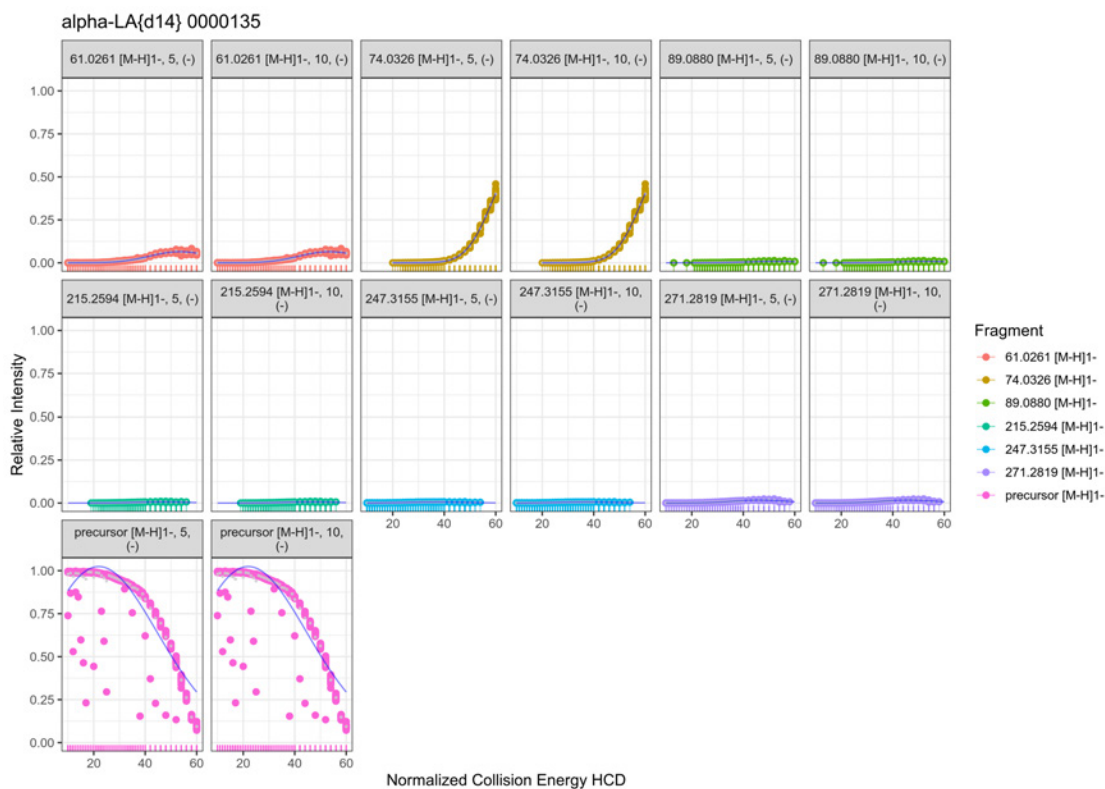

Figure 281. Nonlinear fit

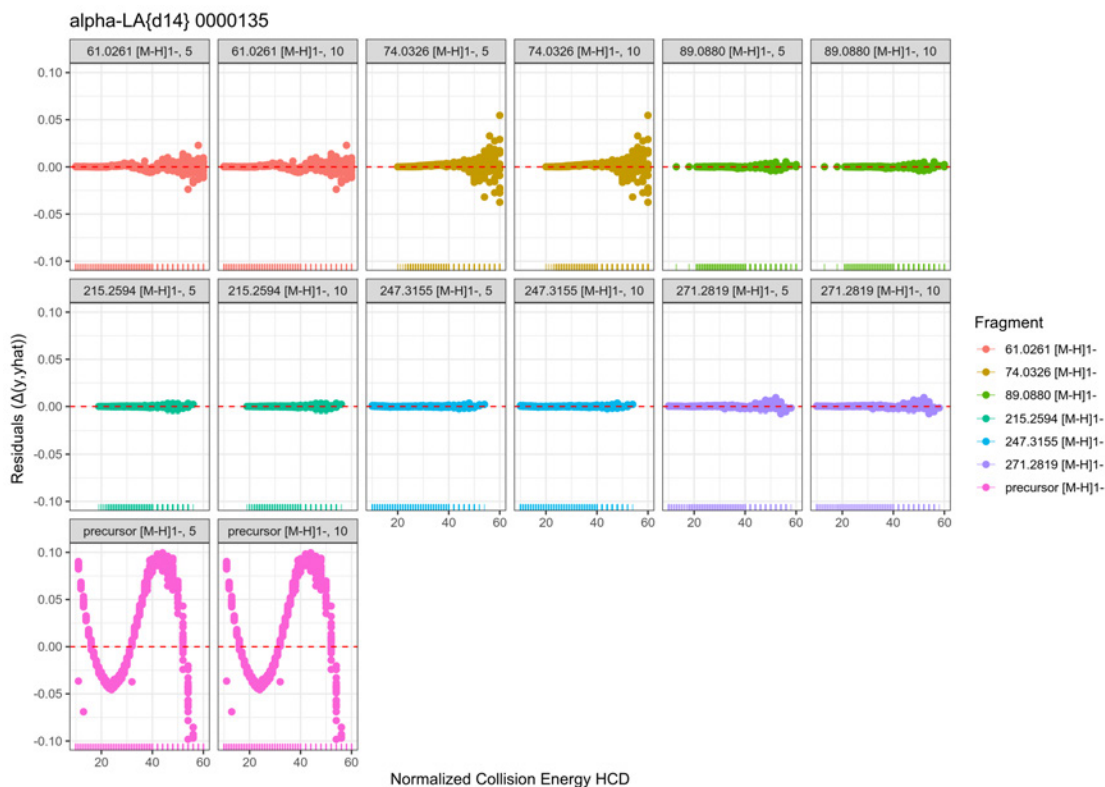

Figure 282. Residuals of nonlinear fit

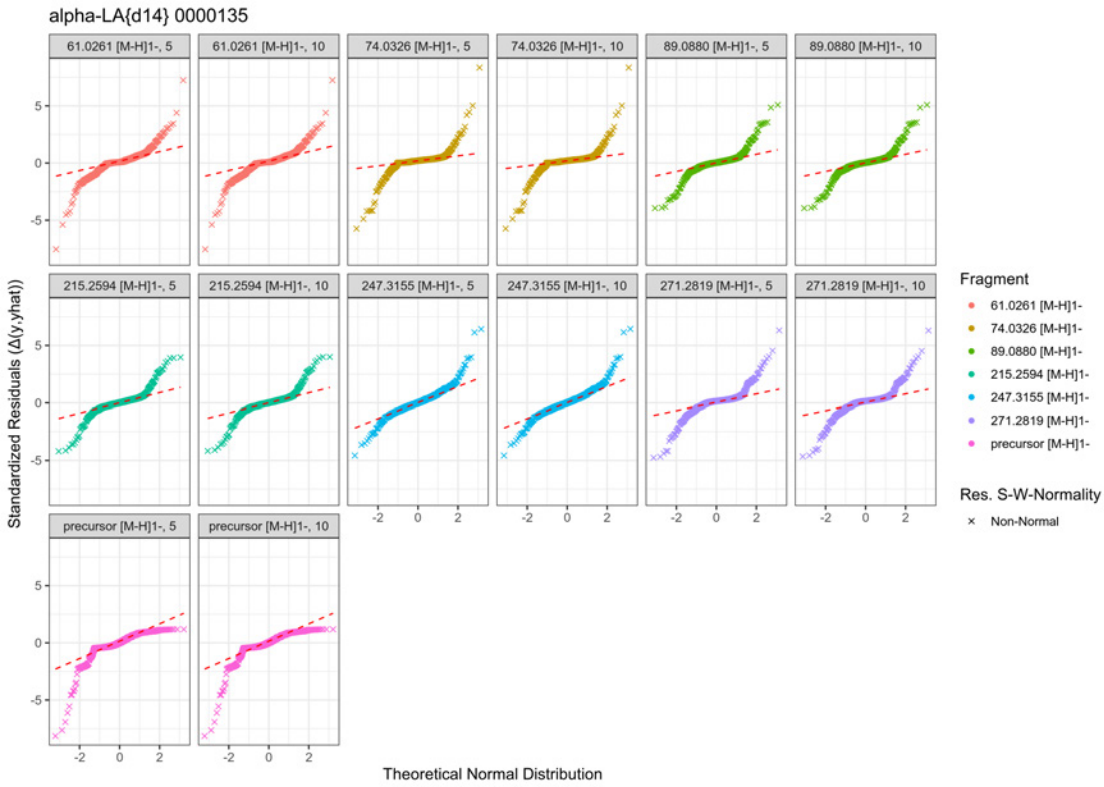

Figure 283. Quantile-quantile plot of residuals

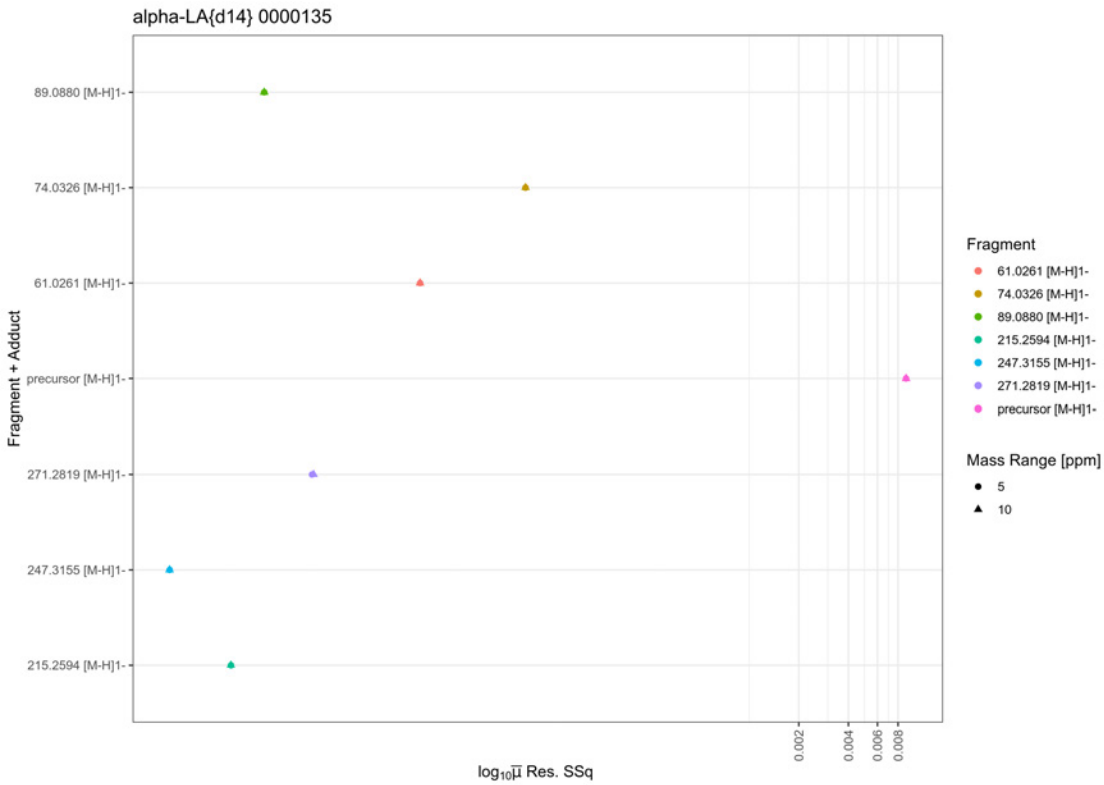

Figure 284. Normalized sum-of-squares of the residuals



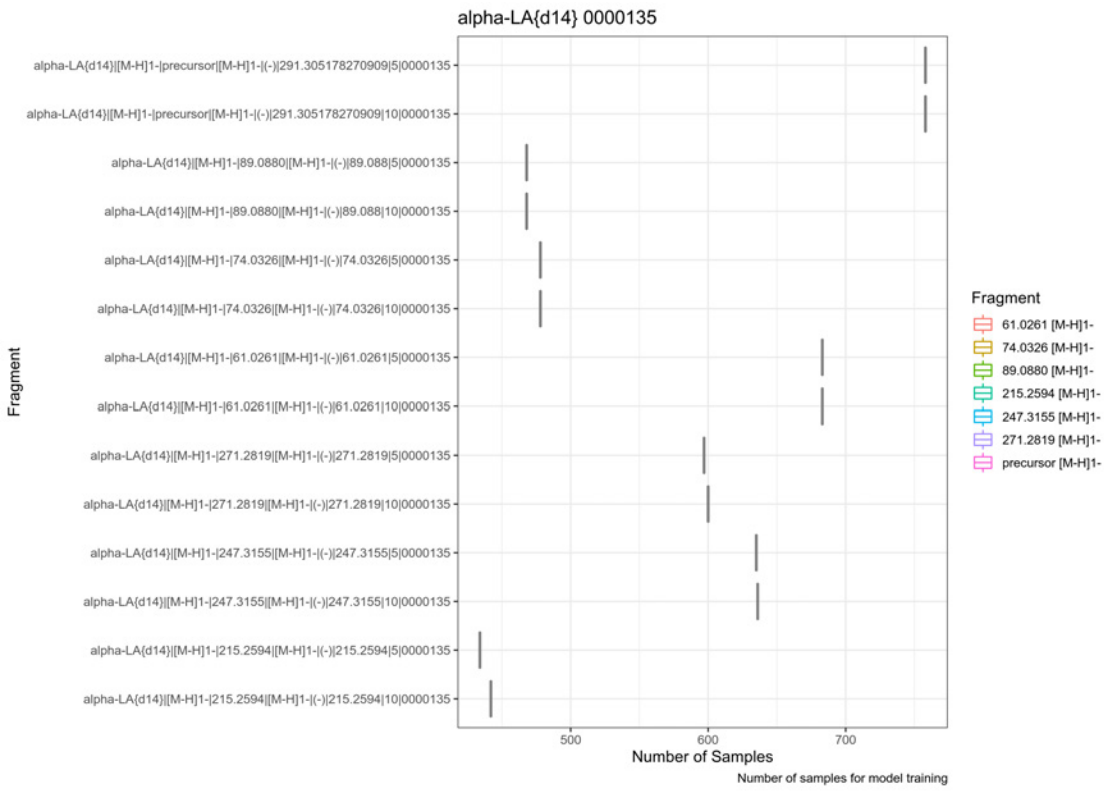

Figure 285. Number of samples used for training per combination Id

# 1.58. tetranor-12-HETE [M-H]1- 0001351

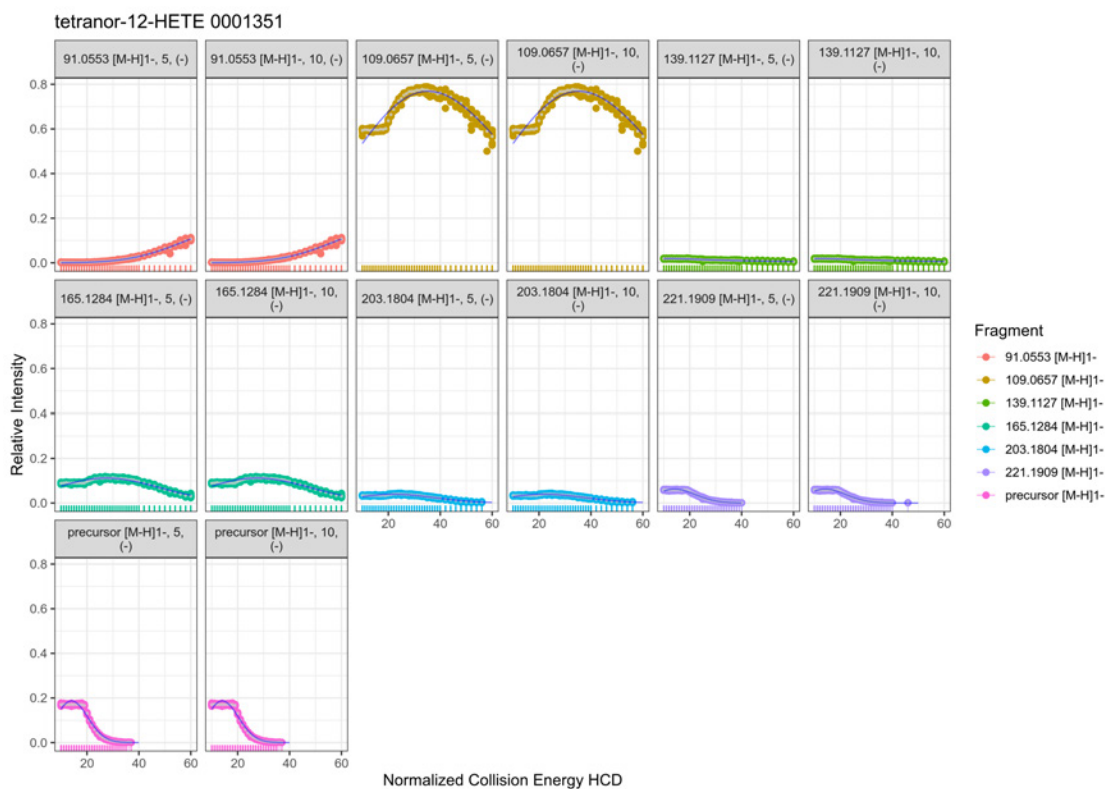

Figure 286. Nonlinear fit

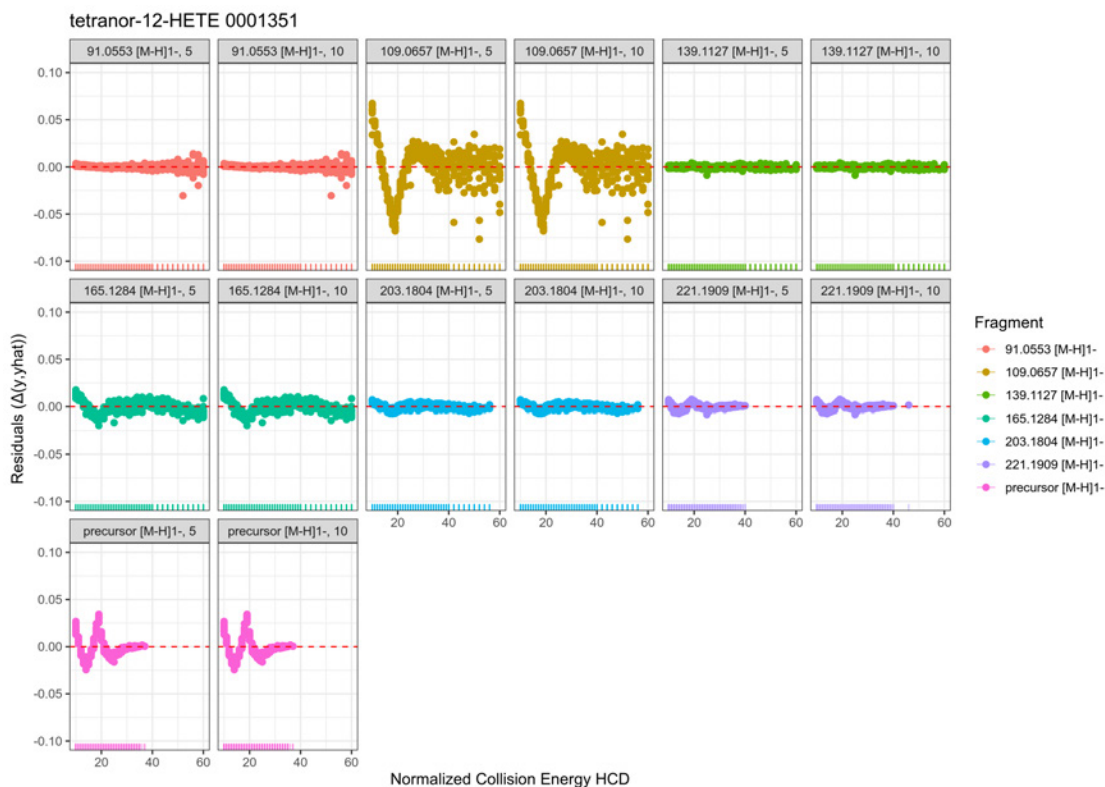

Figure 287. Residuals of nonlinear fit

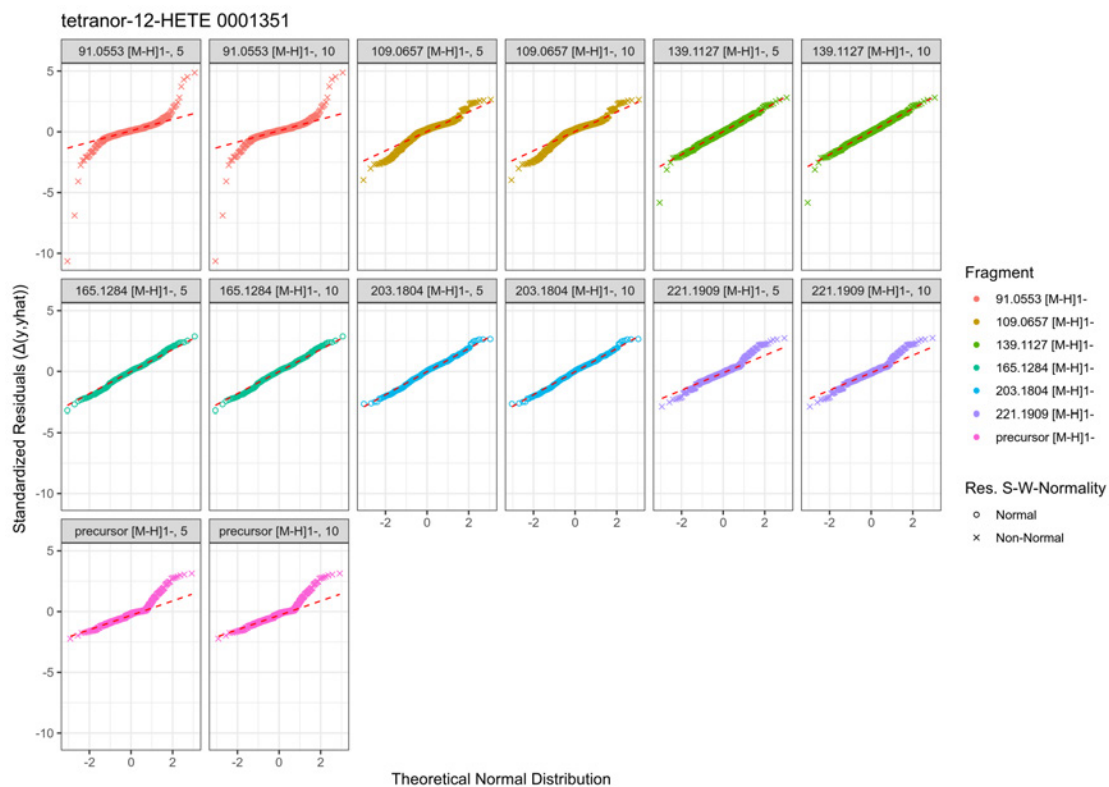

Figure 288. Quantile-quantile plot of residuals

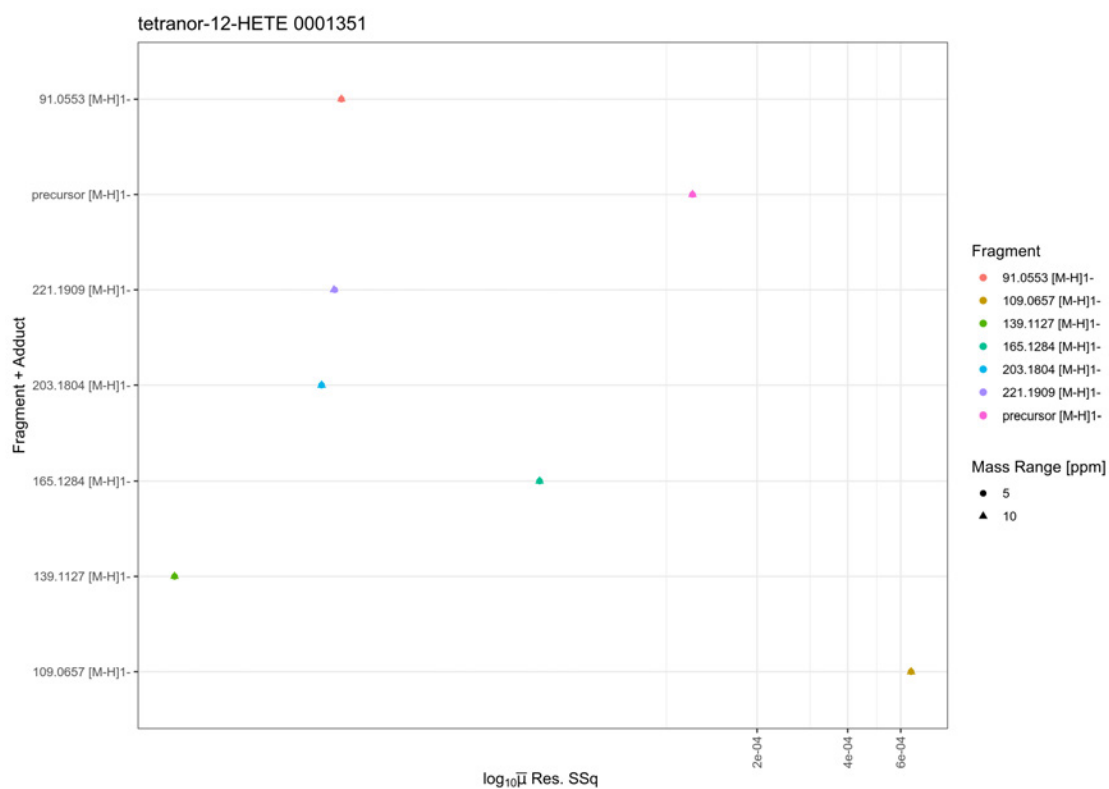

Figure 289. Normalized sum-of-squares of the residuals

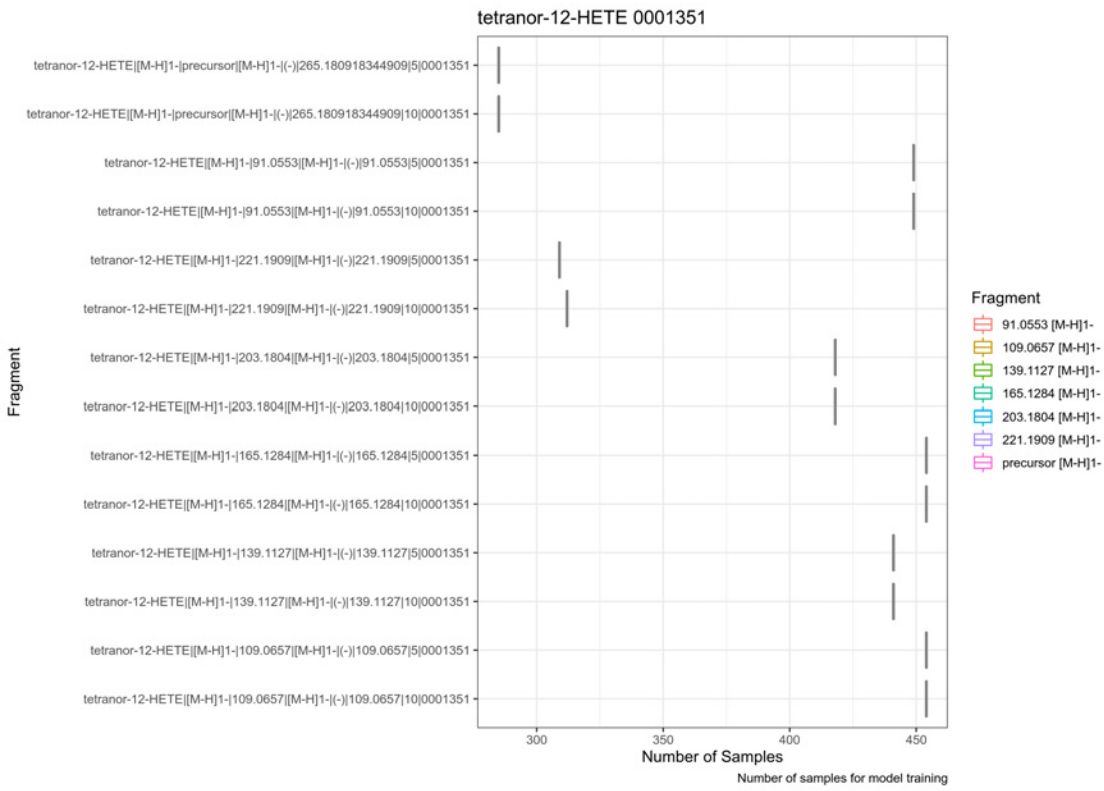

Figure 290. Number of samples used for training per combination Id
