# Supplementary material for: LipidCreator workbench to probe the lipidomic landscape
Source: PubMed Central journal article supplement (PMC7188904; doi:10.1038/s41467-020-15960-z), 2020-04-28
Supplement: 41467_2020_15960_MOESM9_ESM.pdf [file 41467_2020_15960_MOESM9_ESM.pdf]

# Supplementary Data 6 - Modeling Results for the Agilent 6545 Q-TOF LC/MS [MS:1002791] platform for:

## LipidCreator workbench to probe the lipidomic landscape

Bing Peng<sup>1,2, #</sup>, Dominik Kopczynski<sup>1,#</sup>, Brian S Pratt<sup>3</sup>, Christer S Ejsing<sup>4,5</sup>, Bo Burla<sup>6</sup>, Martin Hermansson<sup>4,7</sup>, Peter Imre Benke<sup>8</sup>, Sock Hwee Tan<sup>9,10</sup>, Mark Y Chan<sup>9,10,11</sup>, Federico Torta<sup>8</sup>, Dominik Schwudke<sup>12,13,14</sup>, Sven Meckelmann<sup>15</sup>, Cristina Coman<sup>1,17</sup>, Oliver J Schmitz<sup>15</sup>, Brendan MacLean<sup>3</sup>, Mailin-Christin Manke<sup>16</sup>, Oliver Borst<sup>16</sup>, Markus R Wenk<sup>6,8</sup>, Nils Hoffmann<sup>1</sup>, Robert Ahrends<sup>1,17,\*</sup>

<sup>1</sup> Leibniz-Institut für Analytische Wissenschaften – ISAS - e.V., 44139 Dortmund, Germany

<sup>2</sup> Division of Rheumatology, Department of Medicine Solna, Karolinska Institutet, Karolinska University Hospital, SE-171 76 Stockholm, Sweden

<sup>3</sup> University of Washington, Department of Genome Sciences, WA 98195 Seattle, USA

<sup>4</sup> Department of Biochemistry and Molecular Biology, University of Southern Denmark, DK-5230 Odense, Denmark

<sup>5</sup> Cell Biology and Biophysics Unit, European Molecular Biology Laboratory, 69117 Heidelberg, Germany

<sup>6</sup> Singapore Lipidomics Incubator (SLING), Life Science Institute, National University of Singapore, 117456 Singapore, Singapore

<sup>7</sup> Wihuri Research Institute, 00290 Helsinki, Finland

<sup>8</sup> Singapore Lipidomics Incubator (SLING), Department of Biochemistry, Yong Loo Lin School of Medicine, National University of Singapore, 117596 Singapore, Singapore

<sup>9</sup> Department of Medicine, Yong Loo Lin School of Medicine, National University Hospital, 119228 Singapore, Singapore

<sup>10</sup> Cardiovascular Research Institute, National University of Singapore, 117599 Singapore, Singapore

<sup>11</sup> National University Heart Centre, National University Health System, 117599 Singapore, Singapore

<sup>12</sup> Research Center Borstel, Leibniz Lung Center, Borstel, Germany

<sup>13</sup> German Center for Infection Research (DZIF), 38124 Braunschweig, Germany

<sup>14</sup> Airway Research Center North Member of the German Center for Lung Research (DZL), 22927 Großhansdorf, Germany

<sup>15</sup> Institute of Applied Analytical Chemistry, University of Duisburg-Essen, 45141 Essen, Germany

<sup>16</sup> Department of Cardiology and Cardiovascular Medicine, University of Tübingen, 72076 Tübingen, Germany

<sup>17</sup> Department of Analytical Chemistry, University of Vienna, Währinger Strasse 38, 1090 Vienna, Austria

# Two authors contributed equally to this work

\* Corresponding author

# Table of Contents

|                                          |     |
|------------------------------------------|-----|
| 1. Agilent 6545 Q-TOF LC/MS [MS:1002791] | 2   |
| 1.1. 10-HDoHE [M-H]1- 1min0239           | 2   |
| 1.2. 11(12)-EET{d11} [M-H]1- 1min0077    | 5   |
| 1.3. 11,12-DHET{d11} [M-H]1- 1min0230    | 8   |
| 1.4. 11-HDoHE [M-H]1- 1min0079           | 11  |
| 1.5. 11-HETE [M-H]1- 1min0081            | 14  |
| 1.6. 12(13)-EpOME{d4} [M-H]1- 1min0082   | 17  |
| 1.7. 12-HEPE [M-H]1- 1min0085            | 20  |
| 1.8. 12-HETE{d8} [M-H]1- 1min0088        | 23  |
| 1.9. 12-HHTrE [M-H]1- 1min0089           | 26  |
| 1.10. 12-OxoETE [M-H]1- 1min0165         | 29  |
| 1.11. 13-HODE{d4} [M-H]1- 1min0095       | 32  |
| 1.12. 13-HOTrE [M-H]1- 1min0099          | 35  |
| 1.13. 14(15)-EET{d11} [M-H]1- 1min0101   | 38  |
| 1.14. 14(15)-EpETE [M-H]1- 1min0104      | 41  |
| 1.15. 14,15-DHET{d11} [M-H]1- 1min0224   | 44  |
| 1.16. 15-HEPE [M-H]1- 1min0208           | 47  |
| 1.17. 15-HETE{d8} [M-H]1- 1min0108       | 50  |
| 1.18. 15d-PGJ2{d4} [M-H]1- 1min0219      | 53  |
| 1.19. 16-HDoHE [M-H]1- 1min0112          | 56  |
| 1.20. 18-HEPE [M-H]1- 1min0199           | 59  |
| 1.21. 5(6)-EET{d11} [M-H]1- 1min0227     | 62  |
| 1.22. 5,6-DiHETE [M-H]1- 1min0116        | 65  |
| 1.23. 5-HEPE [M-H]1- 1min0203            | 68  |
| 1.24. 5-HETE{d8} [M-H]1- 1min0215        | 71  |
| 1.25. 5-OxoETE{d7} [M-H]1- 1min0217      | 74  |
| 1.26. 8(9)-EET{d11} [M-H]1- 1min0118     | 77  |
| 1.27. 8,9-DHET{d11} [M-H]1- 1min0235     | 80  |
| 1.28. 8-HDoHE [M-H]1- 1min0120           | 83  |
| 1.29. 8-HETE [M-H]1- 1min0122            | 86  |
| 1.30. 9(10)-EpOME{d4} [M-H]1- 1min0124   | 89  |
| 1.31. 9-HEPE [M-H]1- 1min0128            | 92  |
| 1.32. 9-HETE [M-H]1- 1min0130            | 95  |
| 1.33. 9-HODE [M-H]1- 1min0132            | 98  |
| 1.34. 9-HOTrE [M-H]1- 1min0205           | 101 |
| 1.35. AA{d8} [M-H]1- 1min0134            | 104 |
| 1.36. DHA{d5} [M-H]1- 1min0137           | 107 |
| 1.37. EPA{d5} [M-H]1- 1min0139           | 110 |
| 1.38. LTB4{d4} [M-H]1- 1min0145          | 113 |
| 1.39. LTC4{d5} [M-H]1- 1min0232          | 116 |
| 1.40. LTD4{d5} [M-H]1- 1min0222          | 119 |

|                                         |     |
|-----------------------------------------|-----|
| 1.41. PGB2{d4} [M-H]1- 1min0220         | 122 |
| 1.42. PGD2{d4} [M-H]1- 1min0151         | 125 |
| 1.43. PGE2{d4} [M-H]1- 1min0241         | 128 |
| 1.44. PGE2{d9} [M-H]1- 1min0164         | 131 |
| 1.45. PGF2alpha{d4} [M-H]1- 1min0194    | 134 |
| 1.46. PGI2 [M-H]1- 1min0196             | 137 |
| 1.47. Resolvin D1{d5} [M-H]1- 1min0152  | 140 |
| 1.48. Resolvin D2{d5} [M-H]1- 1min0197  | 143 |
| 1.49. Resolvin D3 [M-H]1- 1min0210      | 146 |
| 1.50. Resolvin D5 [M-H]1- 1min0212      | 149 |
| 1.51. TXB1 [M-H]1- 1min0155             | 152 |
| 1.52. TXB2{d4} [M-H]1- 1min0071         | 155 |
| 1.53. TXB3 [M-H]1- 1min0072             | 158 |
| 1.54. alpha-LA{d14} [M-H]1- 1min0201    | 161 |
| 1.55. tetranor-12-HETE [M-H]1- 1min0069 | 164 |

## 1. Agilent 6545 Q-TOF LC/MS [MS:1002791]

### 1.1. 10-HDoHE [M-H]1- 1min0239

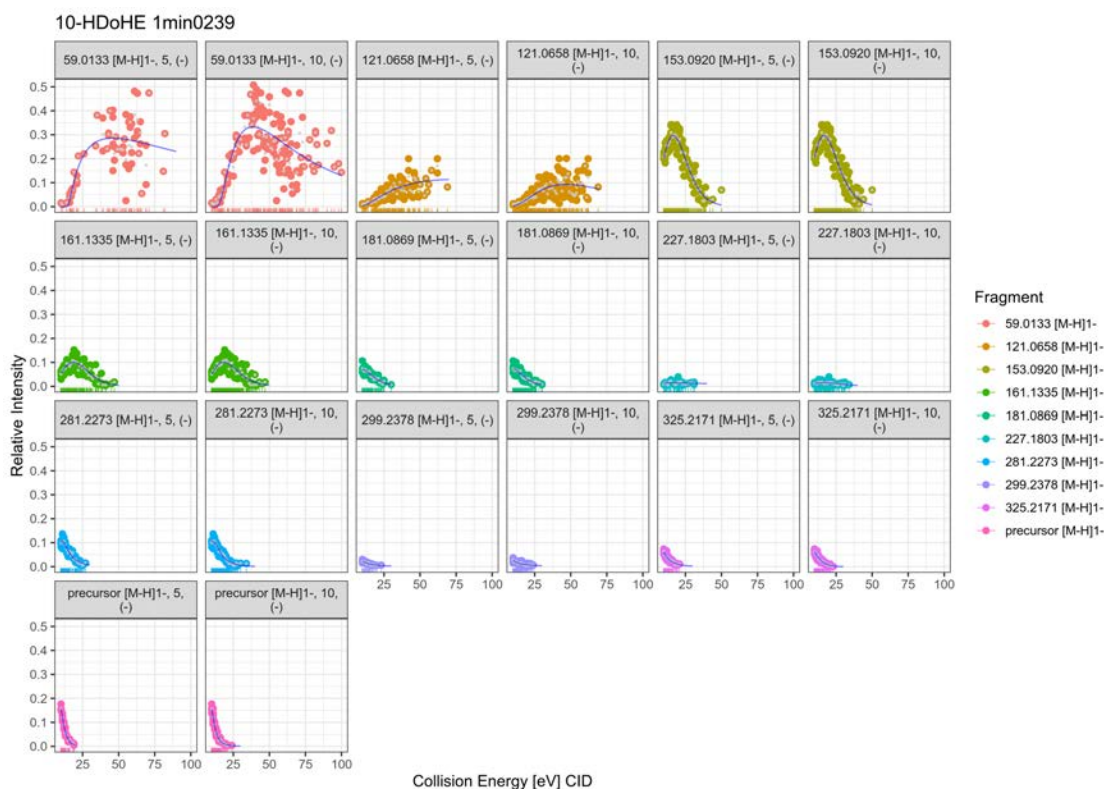

Figure 1. Nonlinear fit

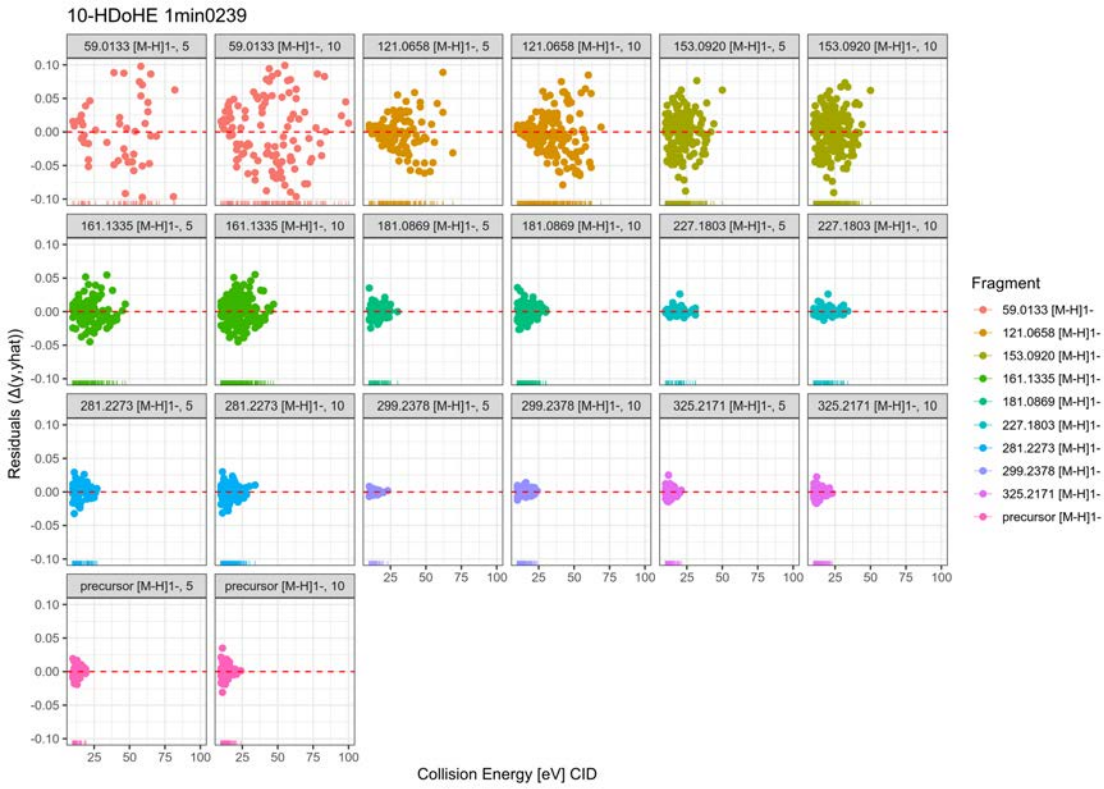

Figure 2. Residuals of nonlinear fit

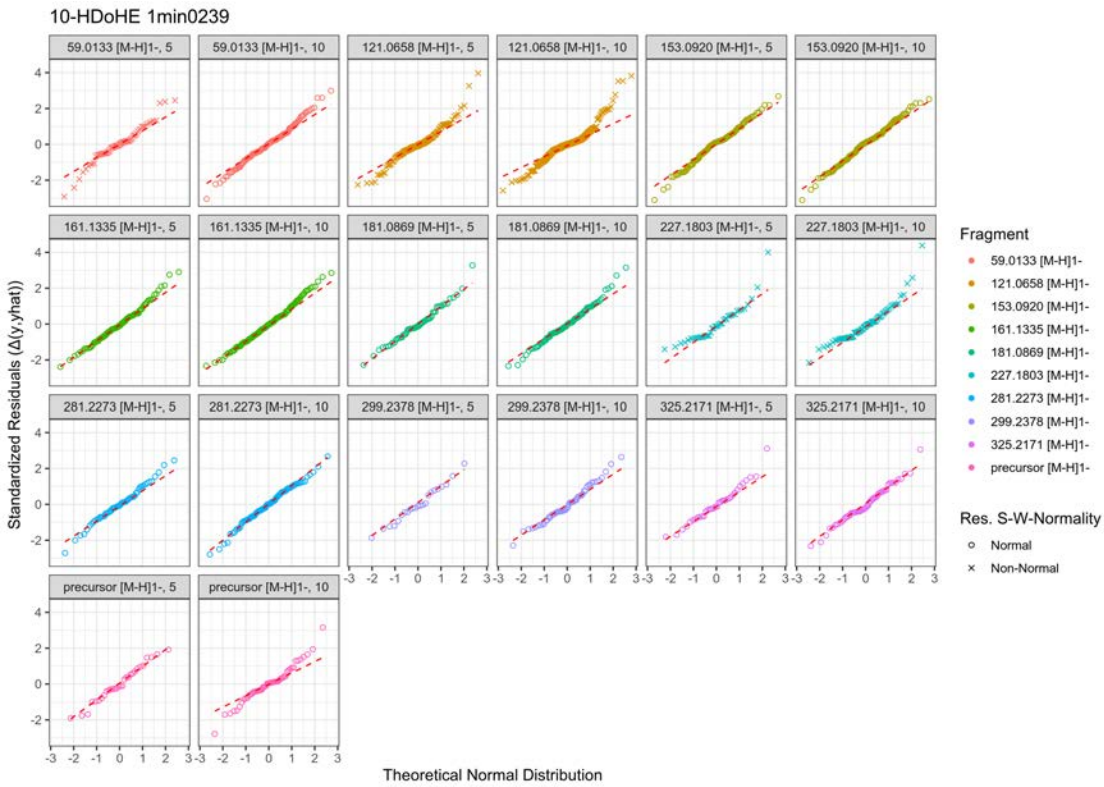

Figure 3. Quantile-quantile plot of residuals



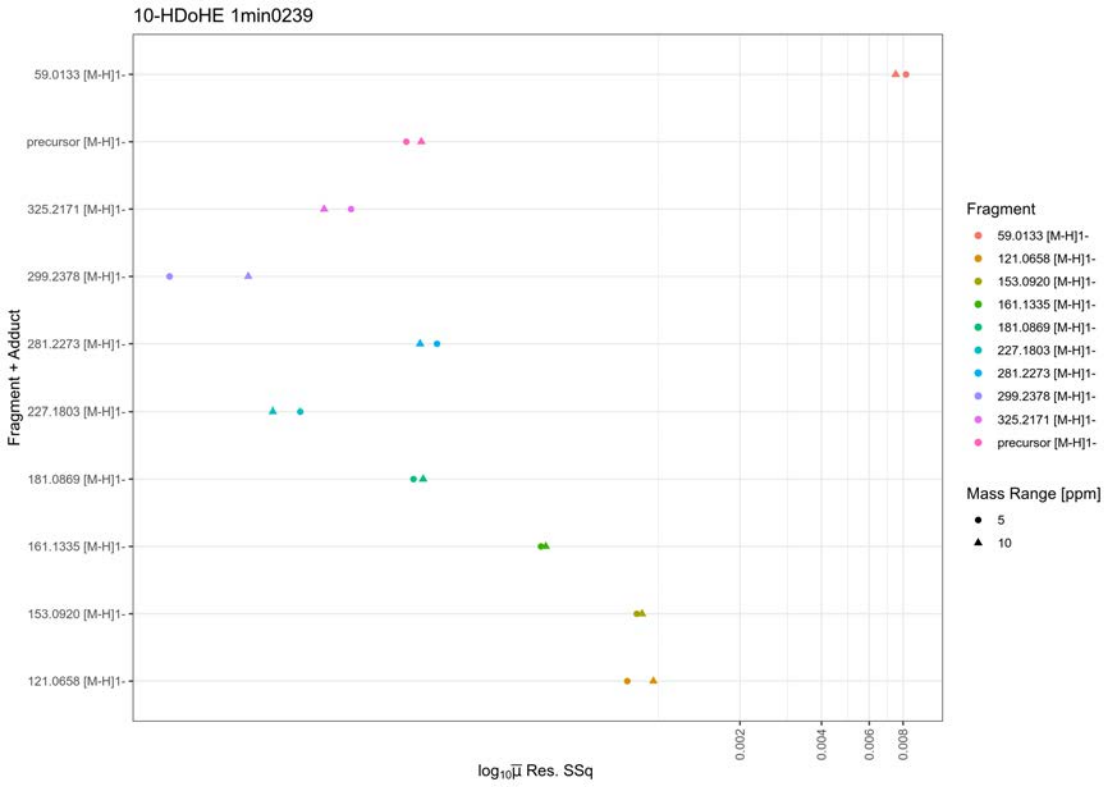

Figure 4. Normalized sum-of-squares of the residuals

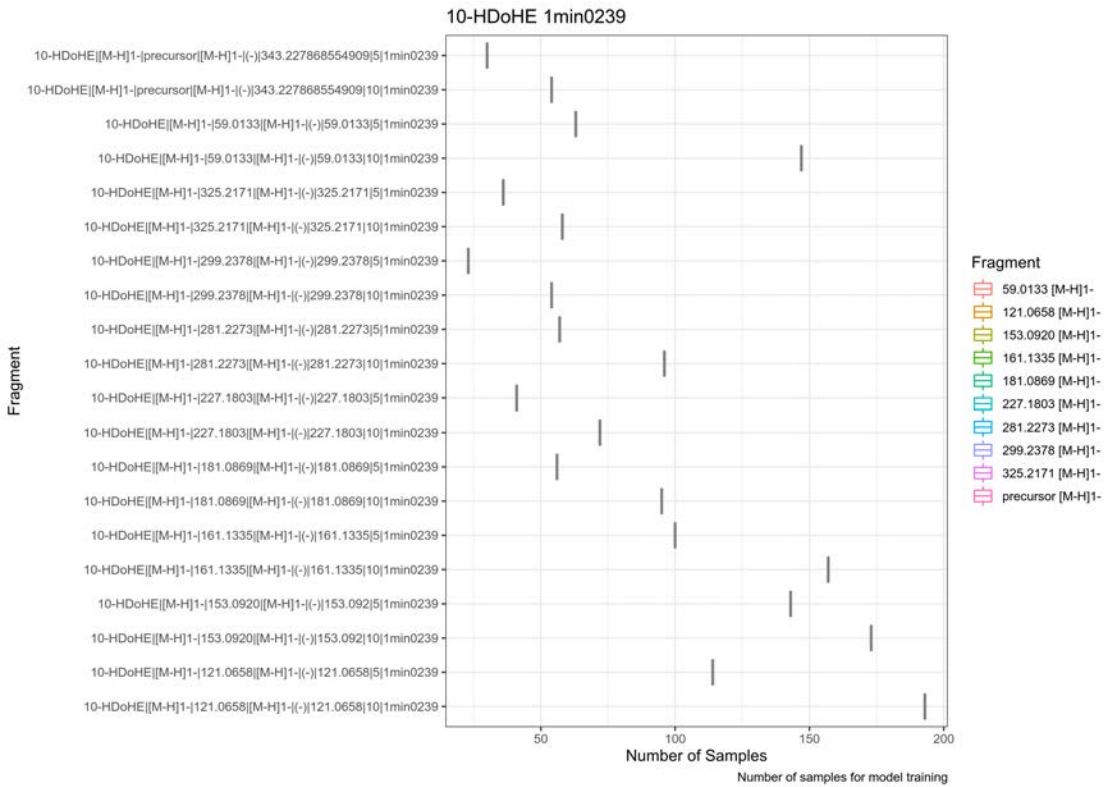

Figure 5. Number of samples used for training per combination Id

## 1.2. 11(12)-EET{d11} [M-H]1- 1min0077

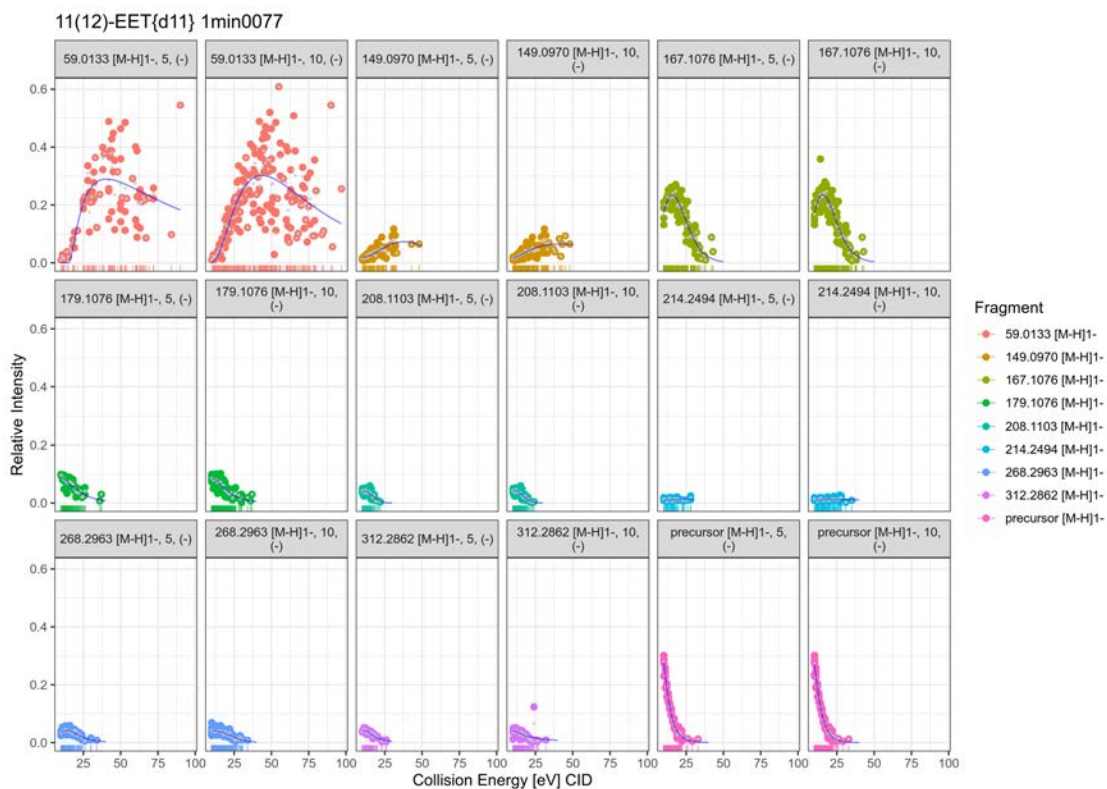

Figure 6. Nonlinear fit

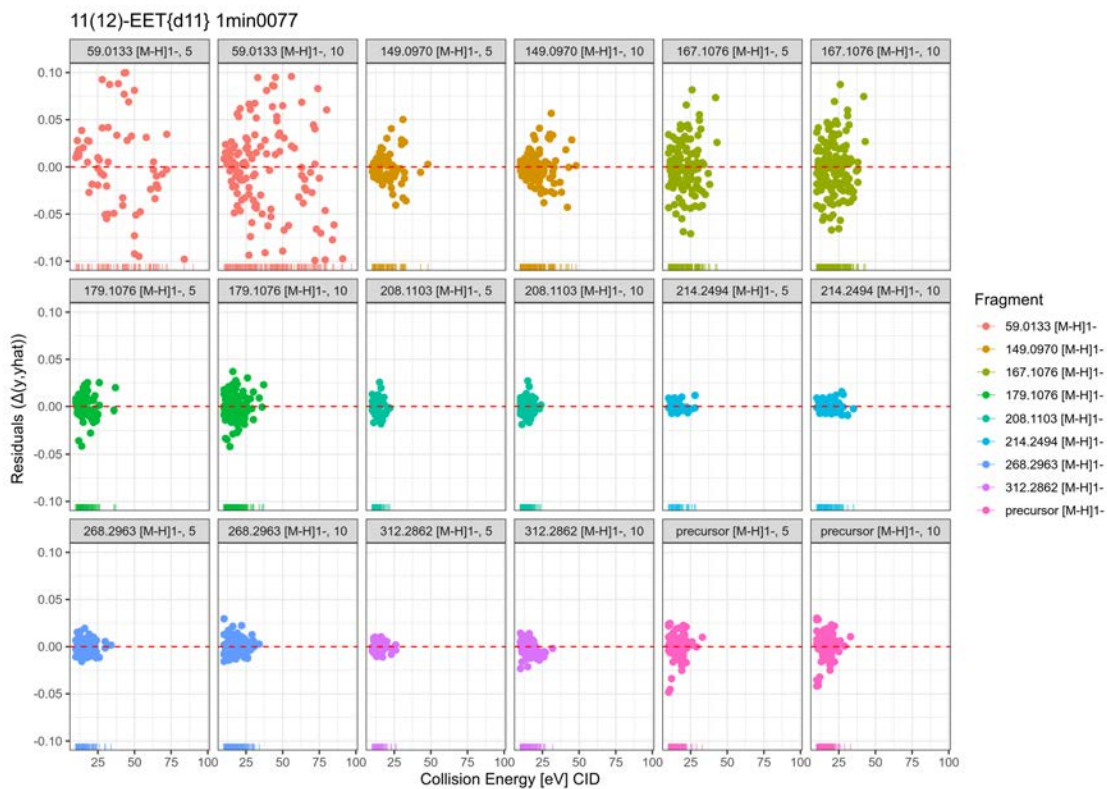

Figure 7. Residuals of nonlinear fit

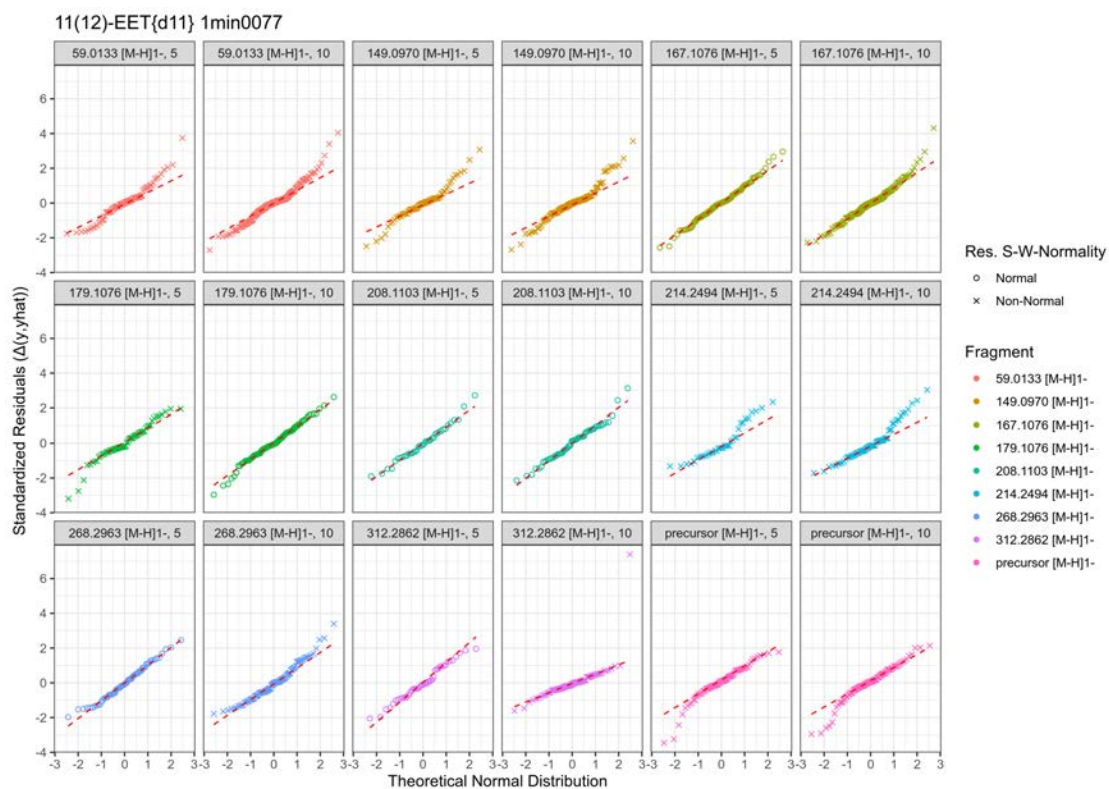

Figure 8. Quantile-quantile plot of residuals

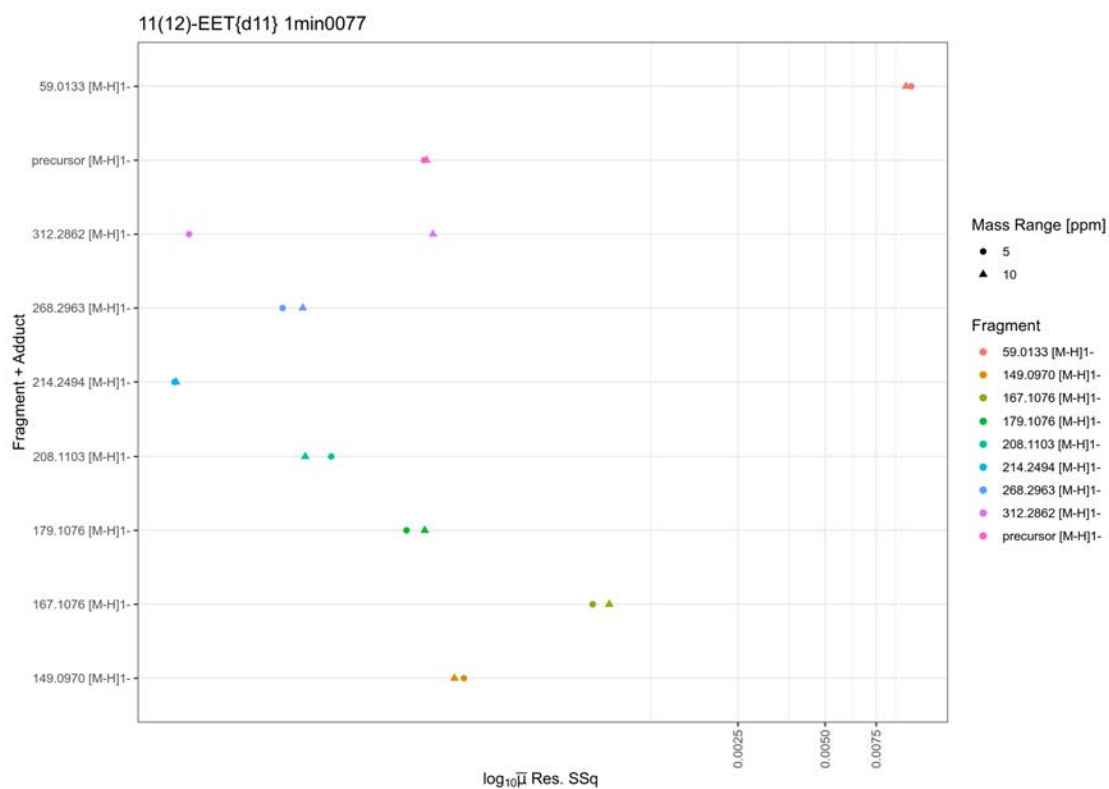

Figure 9. Normalized sum-of-squares of the residuals

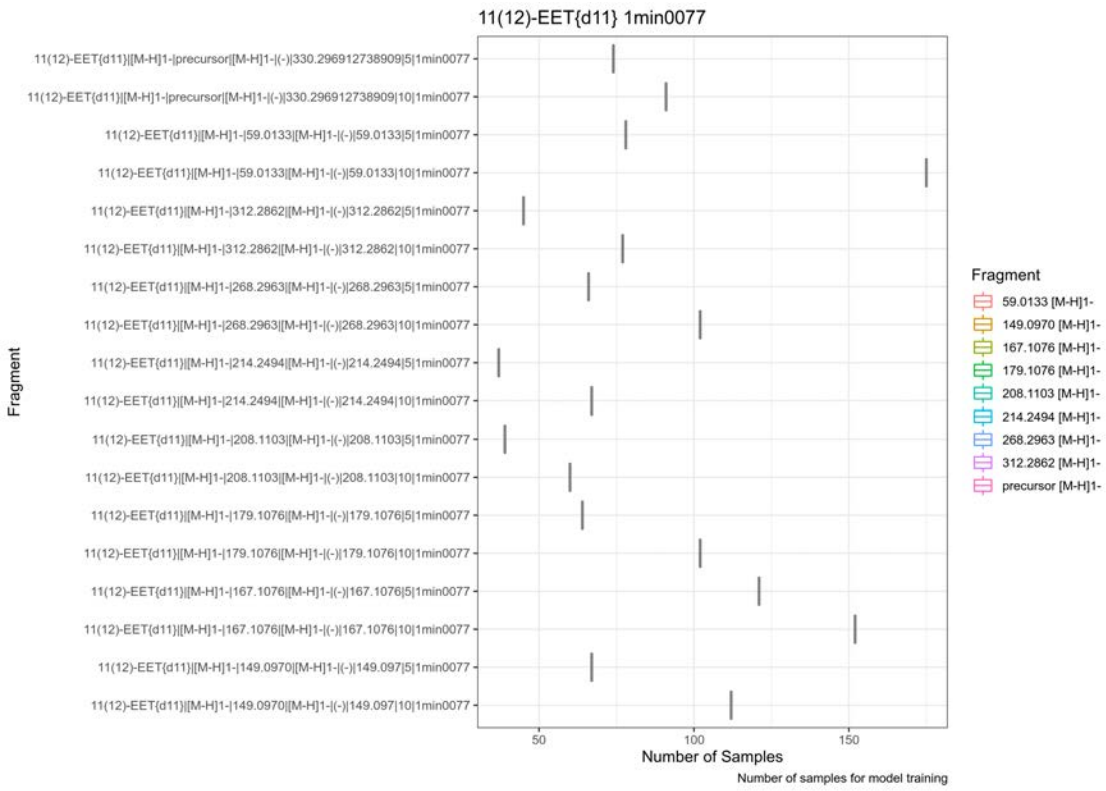

Figure 10. Number of samples used for training per combination Id

### 1.3. 11,12-DHET{d11} [M-H]1- 1min0230

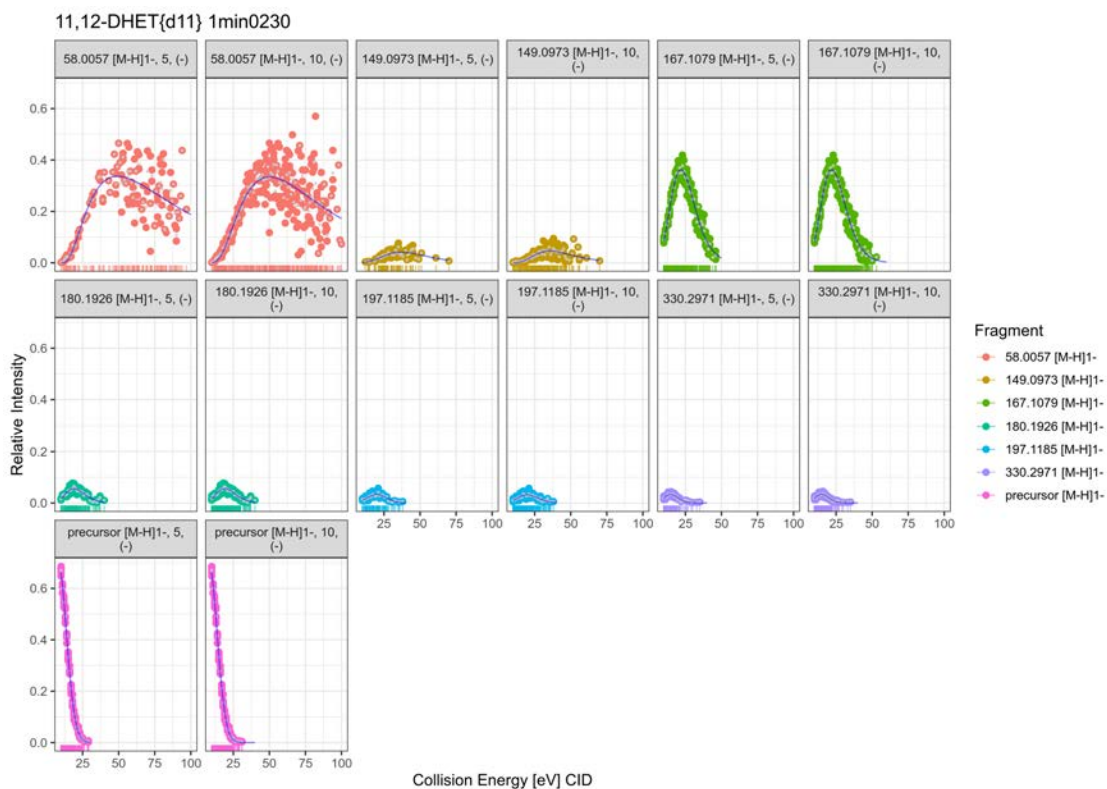

Figure 11. Nonlinear fit

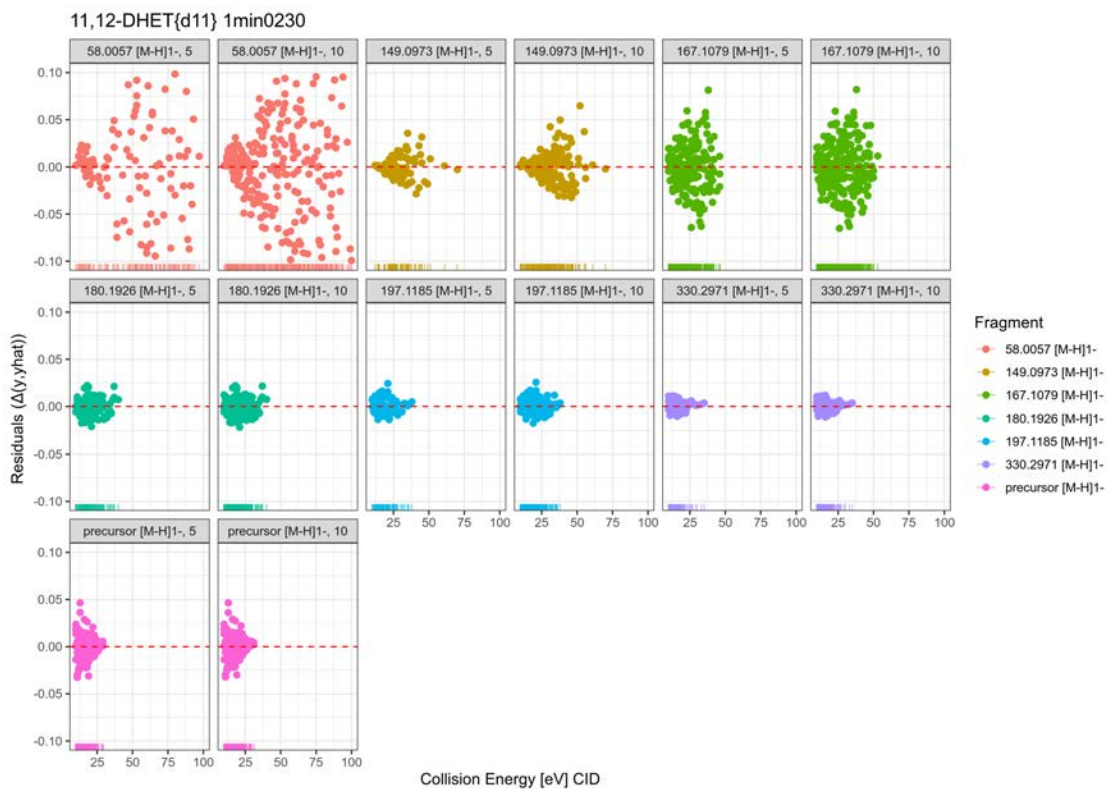

Figure 12. Residuals of nonlinear fit



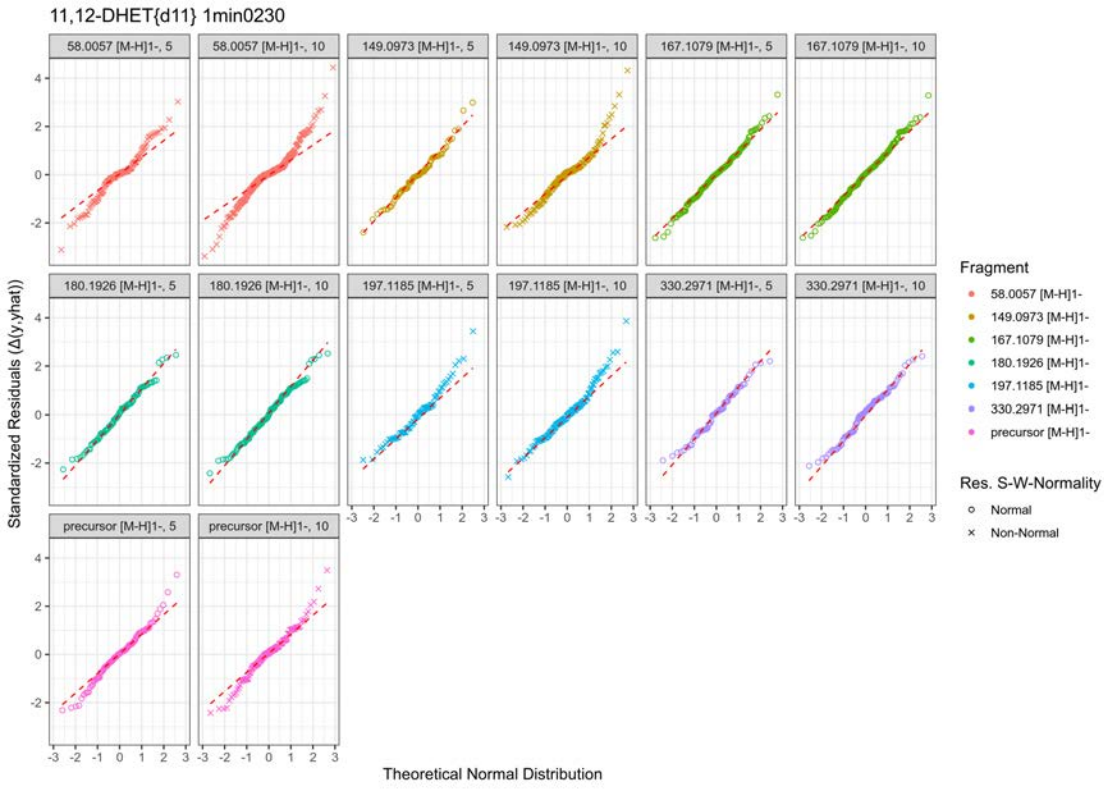

Figure 13. Quantile-quantile plot of residuals

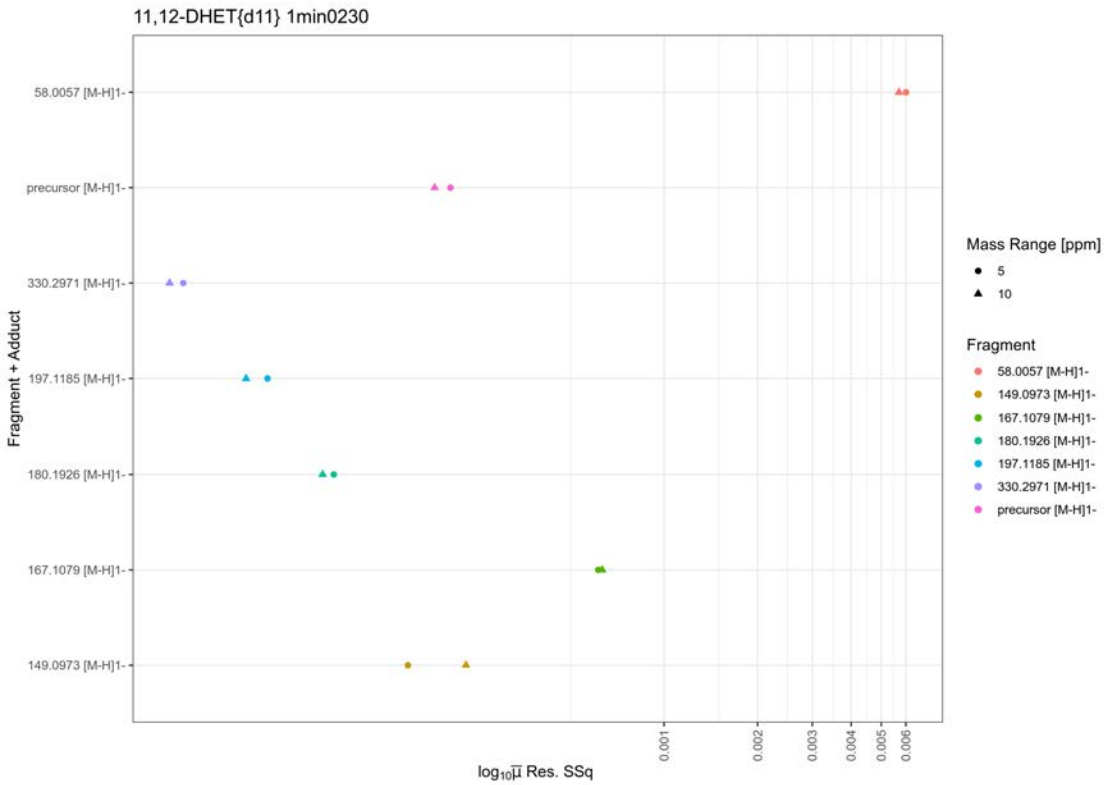

Figure 14. Normalized sum-of-squares of the residuals



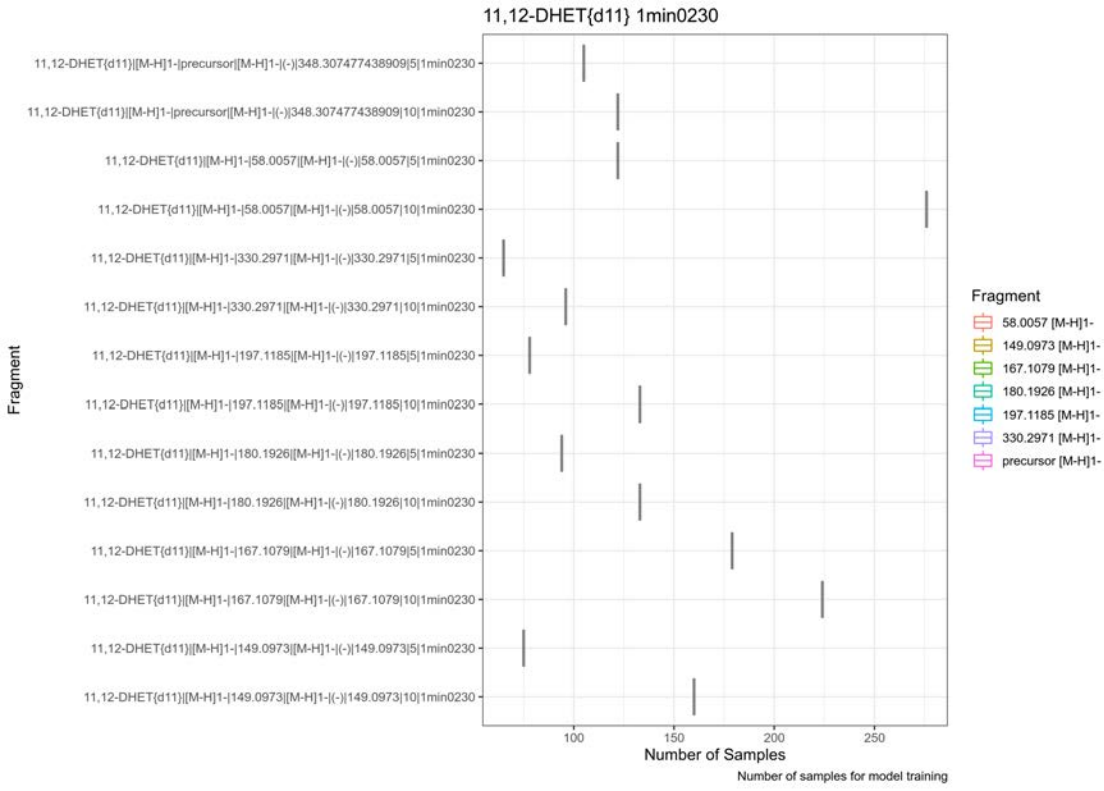

Figure 15. Number of samples used for training per combination Id

# 1.4. 11-HDoHE [M-H]1- 1min0079

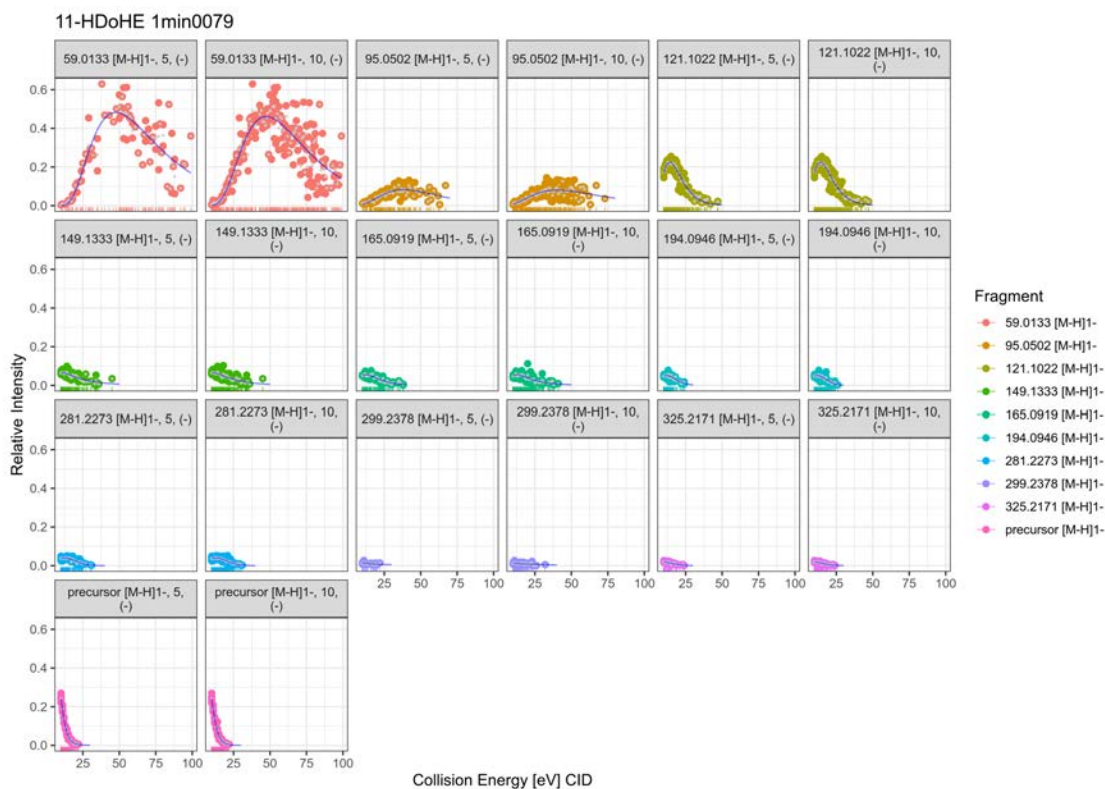

Figure 16. Nonlinear fit

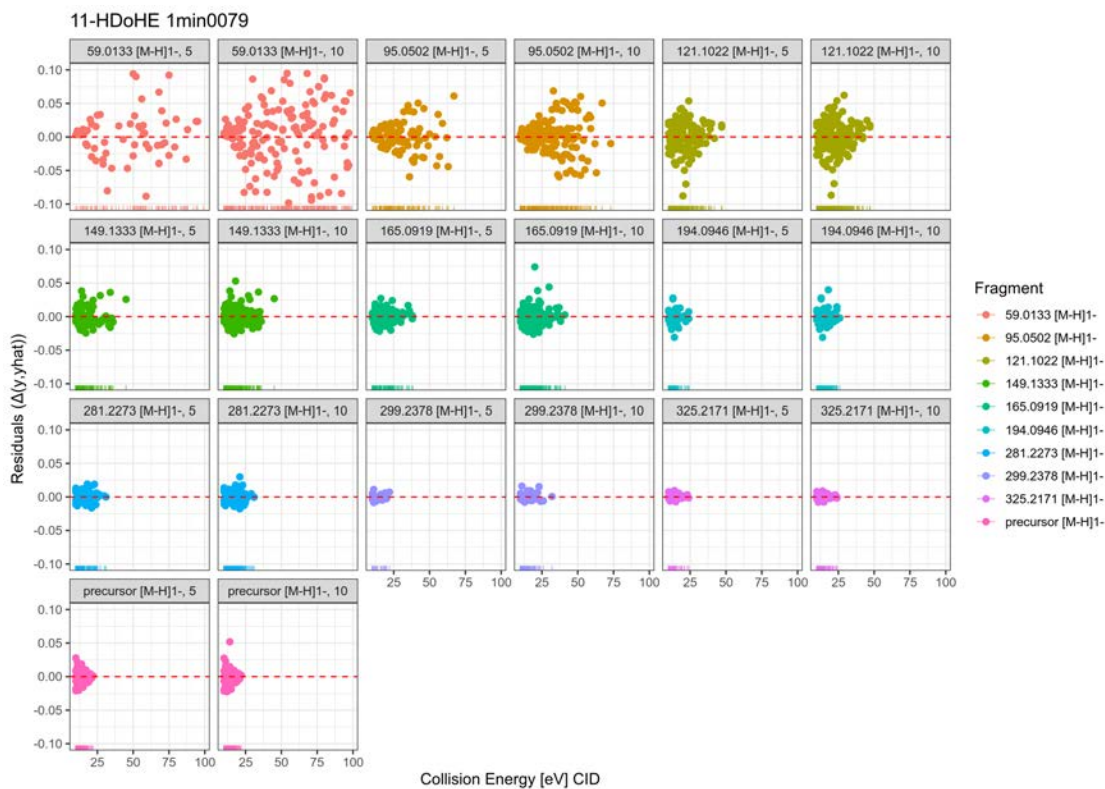

Figure 17. Residuals of nonlinear fit

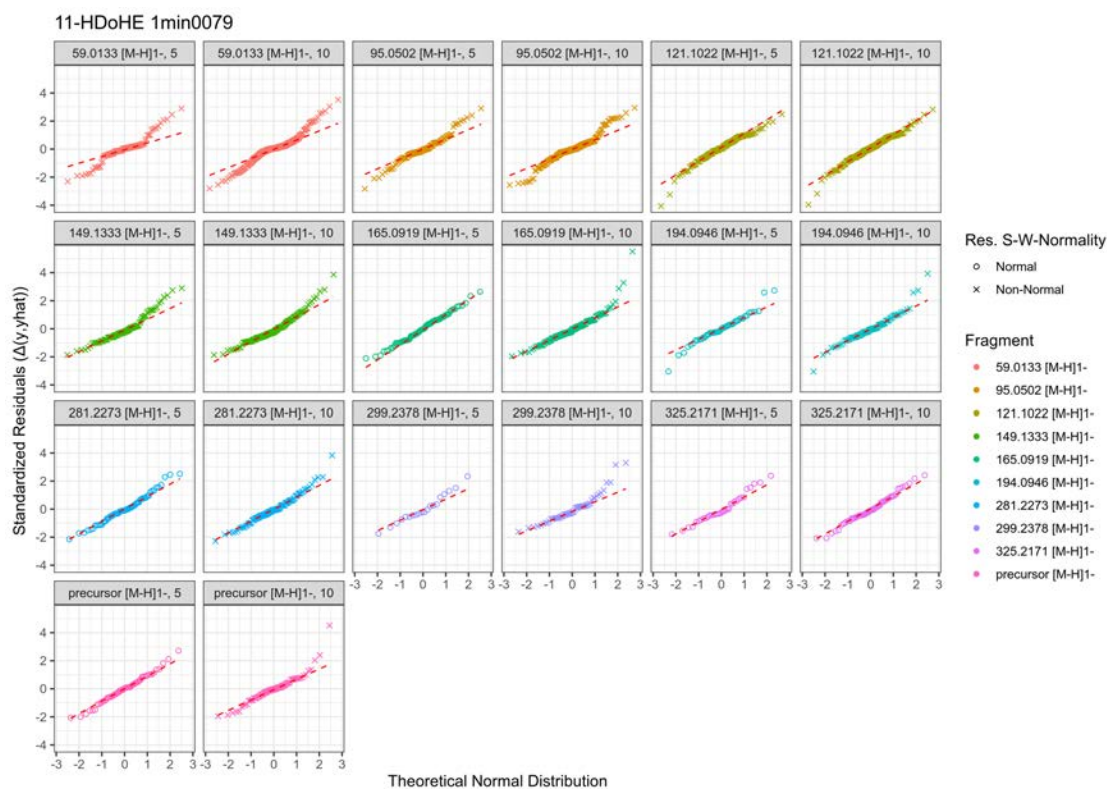

Figure 18. Quantile-quantile plot of residuals

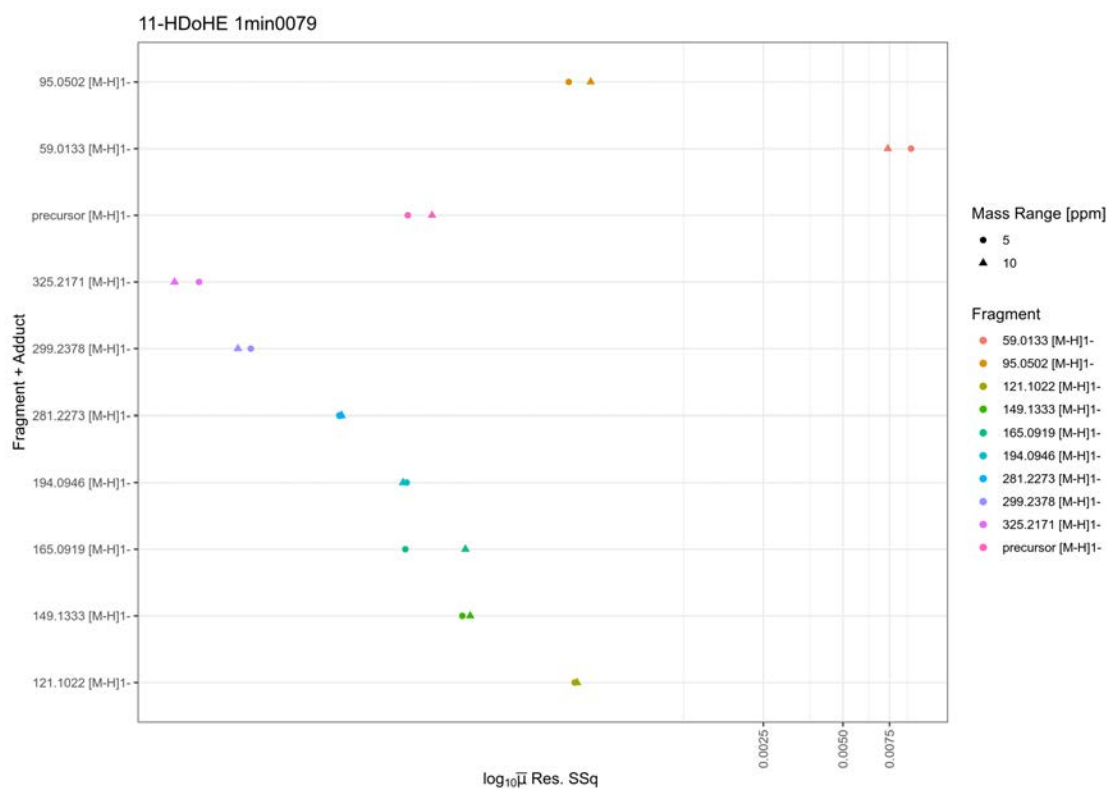

Figure 19. Normalized sum-of-squares of the residuals

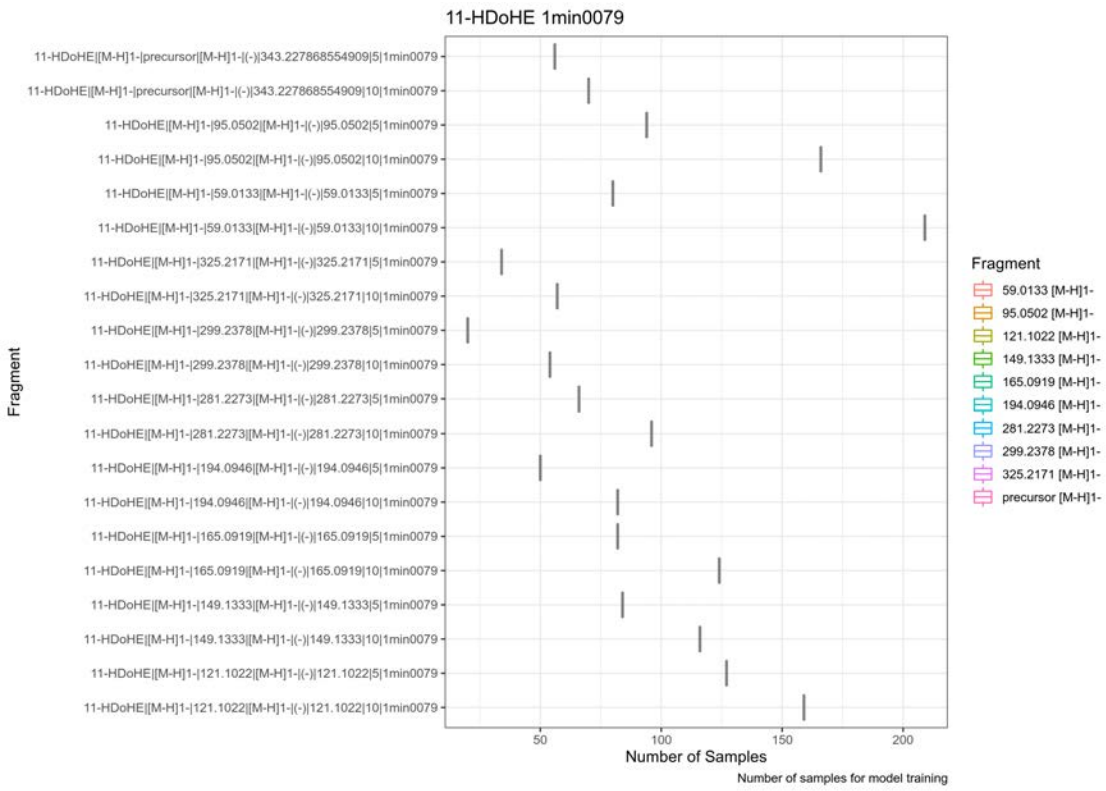

Figure 20. Number of samples used for training per combination Id

# 1.5. 11-HETE [M-H]1- 1min0081

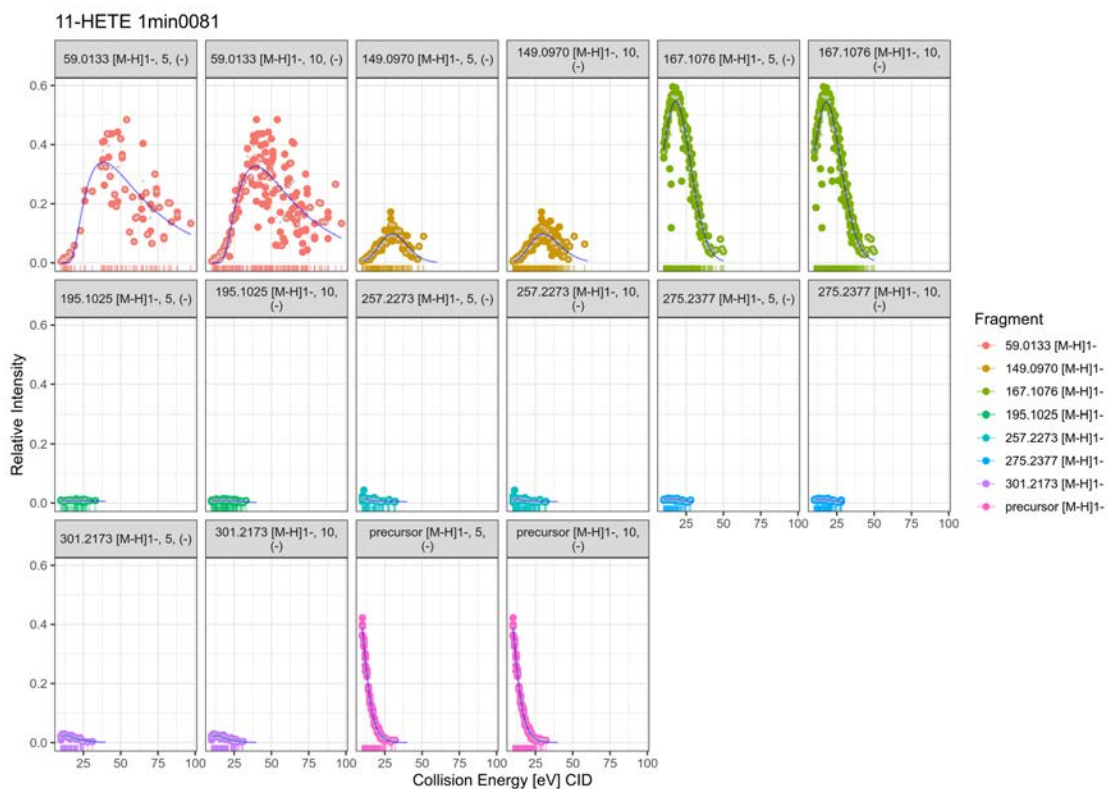

Figure 21. Nonlinear fit

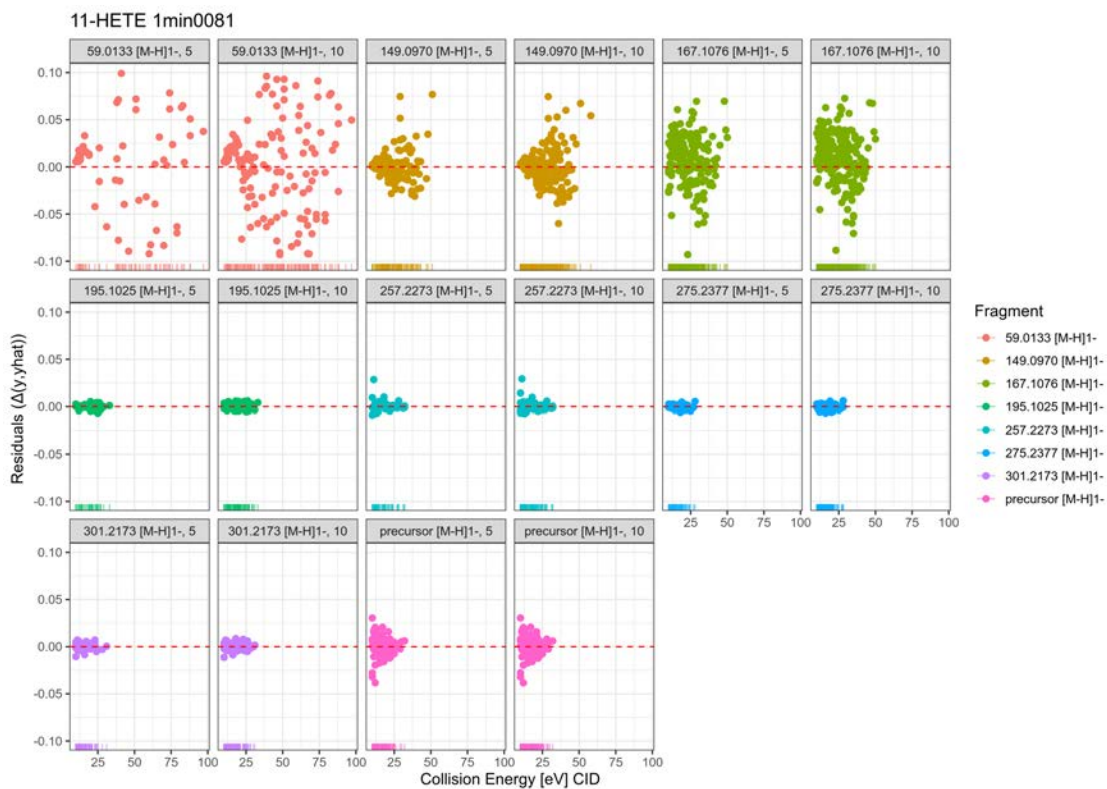

Figure 22. Residuals of nonlinear fit



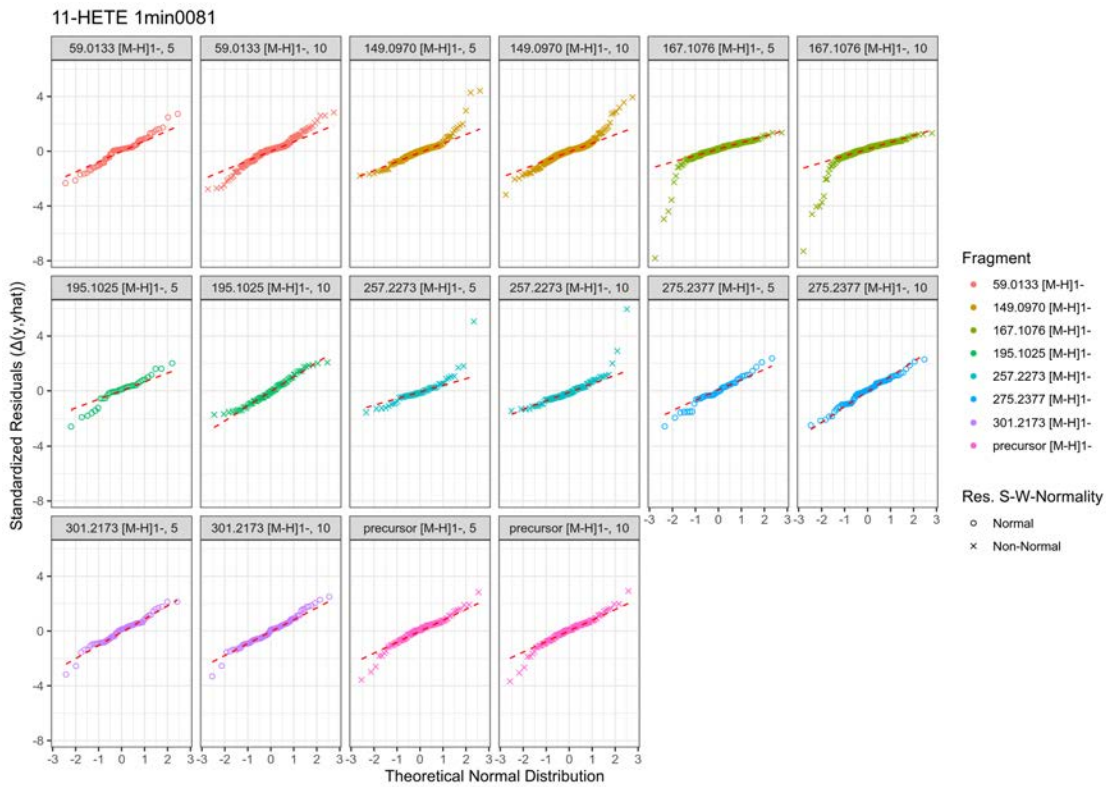

Figure 23. Quantile-quantile plot of residuals

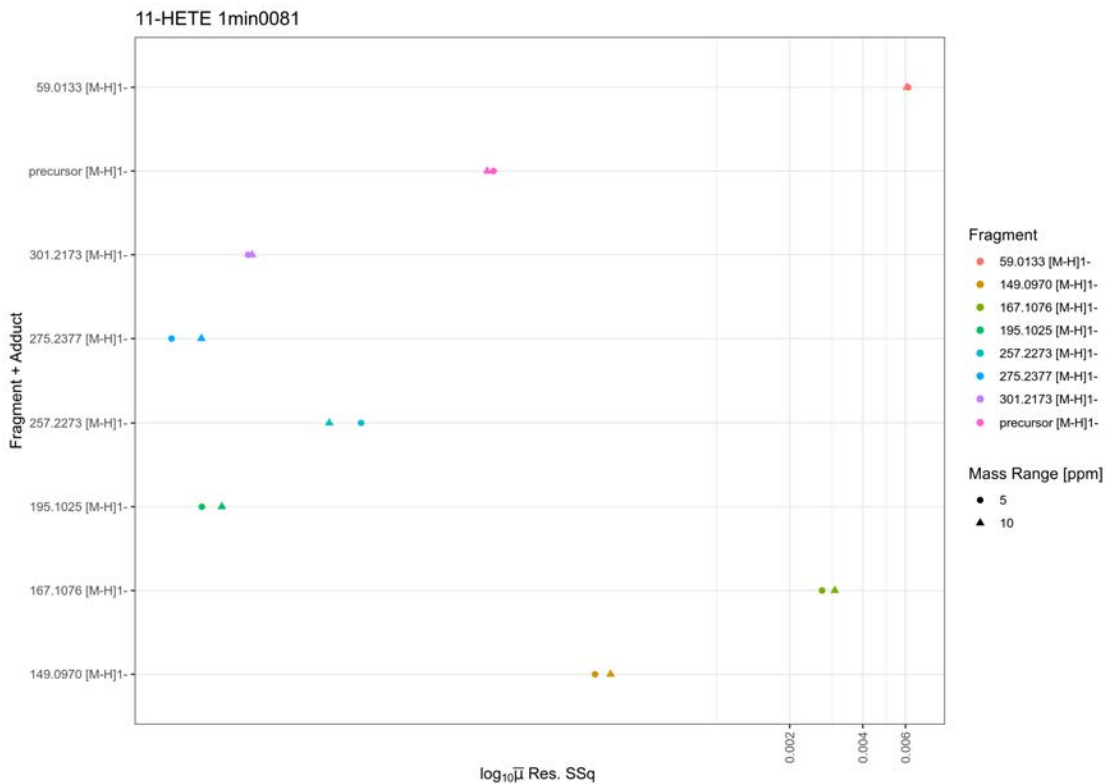

Figure 24. Normalized sum-of-squares of the residuals



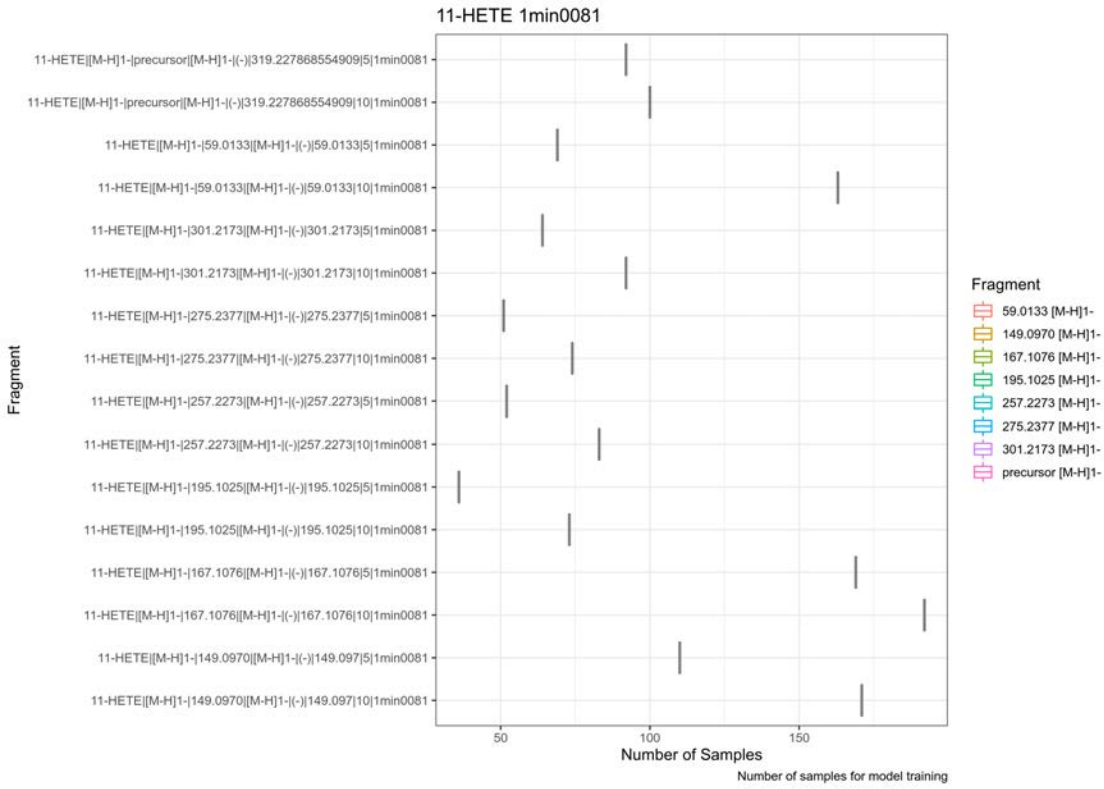

Figure 25. Number of samples used for training per combination Id

## 1.6. 12(13)-EpOME{d4} [M-H]1- 1min0082

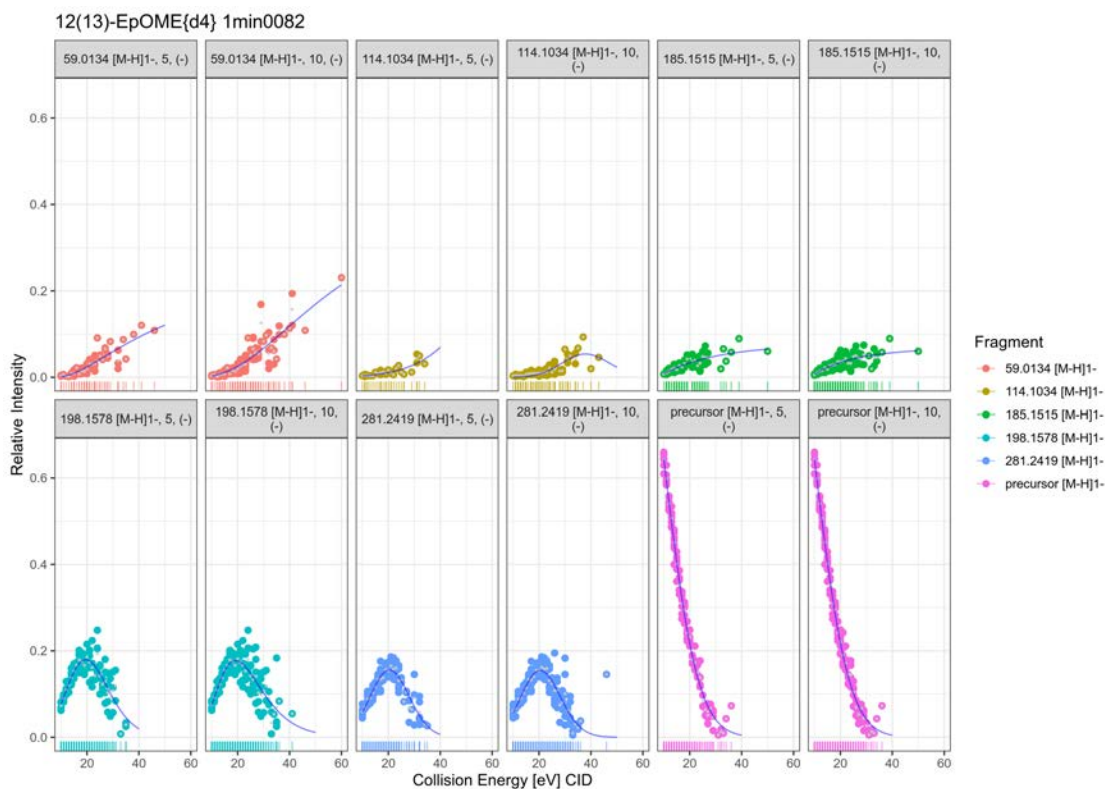

Figure 26. Nonlinear fit

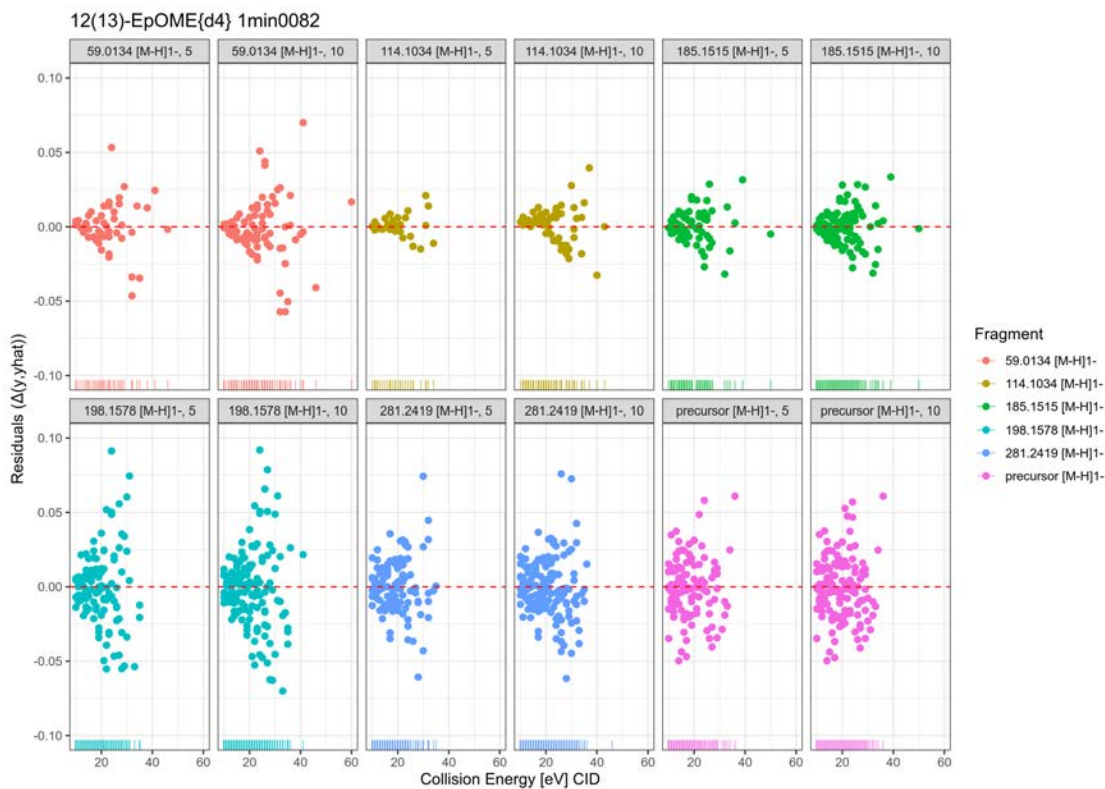

Figure 27. Residuals of nonlinear fit

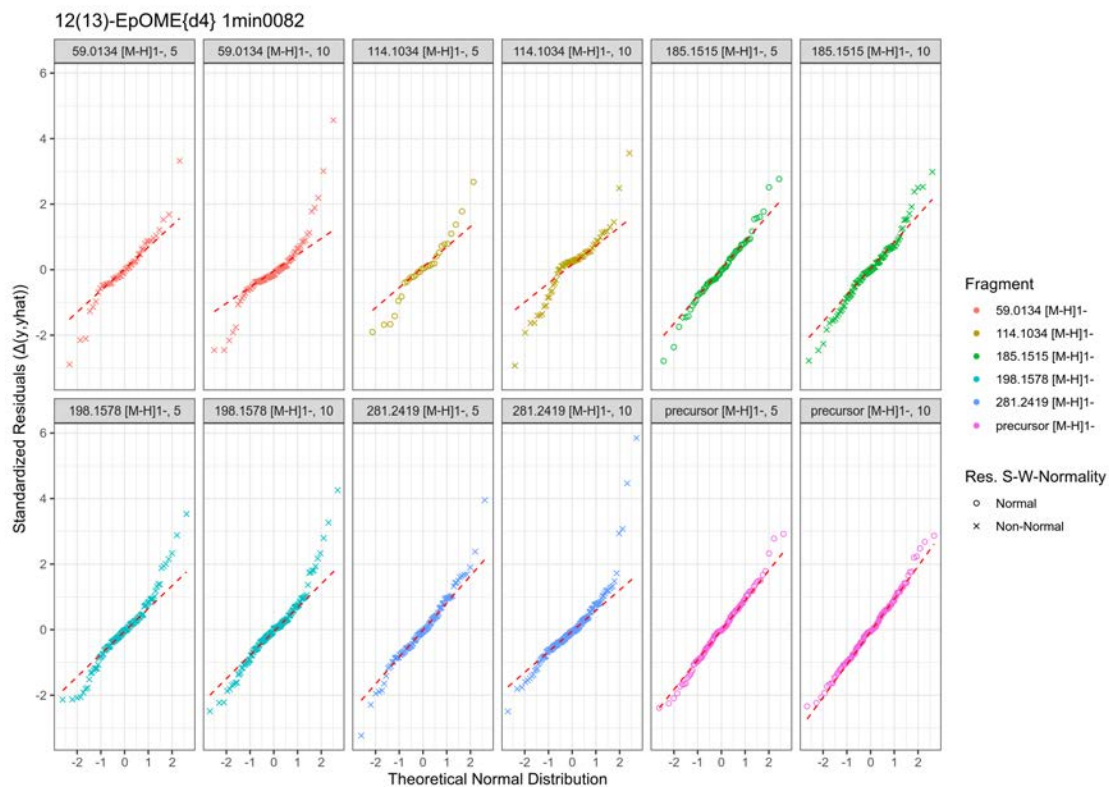

Figure 28. Quantile-quantile plot of residuals

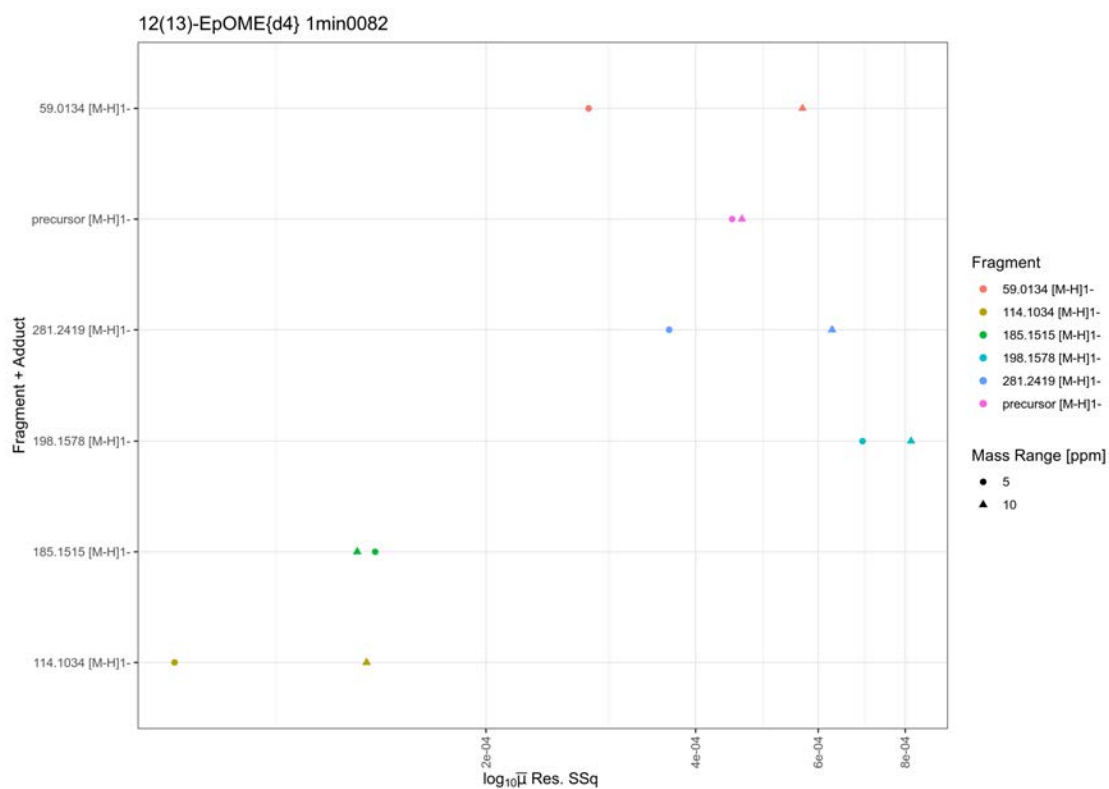

Figure 29. Normalized sum-of-squares of the residuals

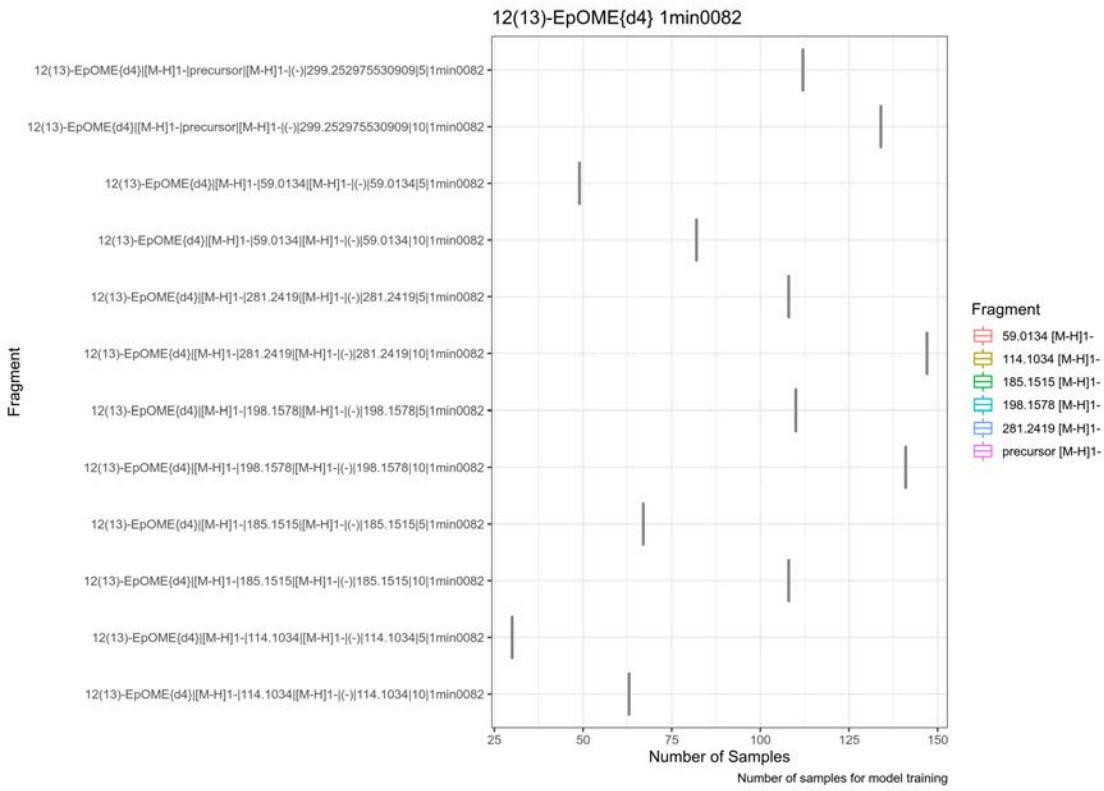

Figure 30. Number of samples used for training per combination Id

# 1.7. 12-HEPE [M-H]1- 1min0085

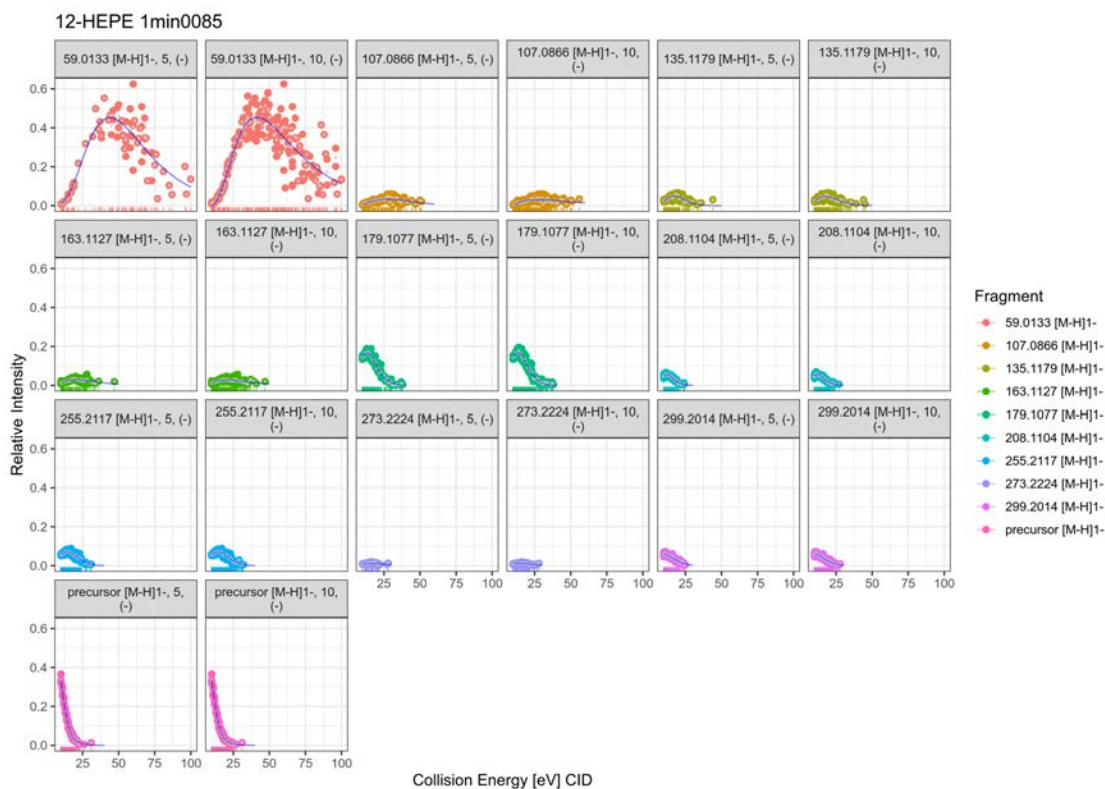

Figure 31. Nonlinear fit

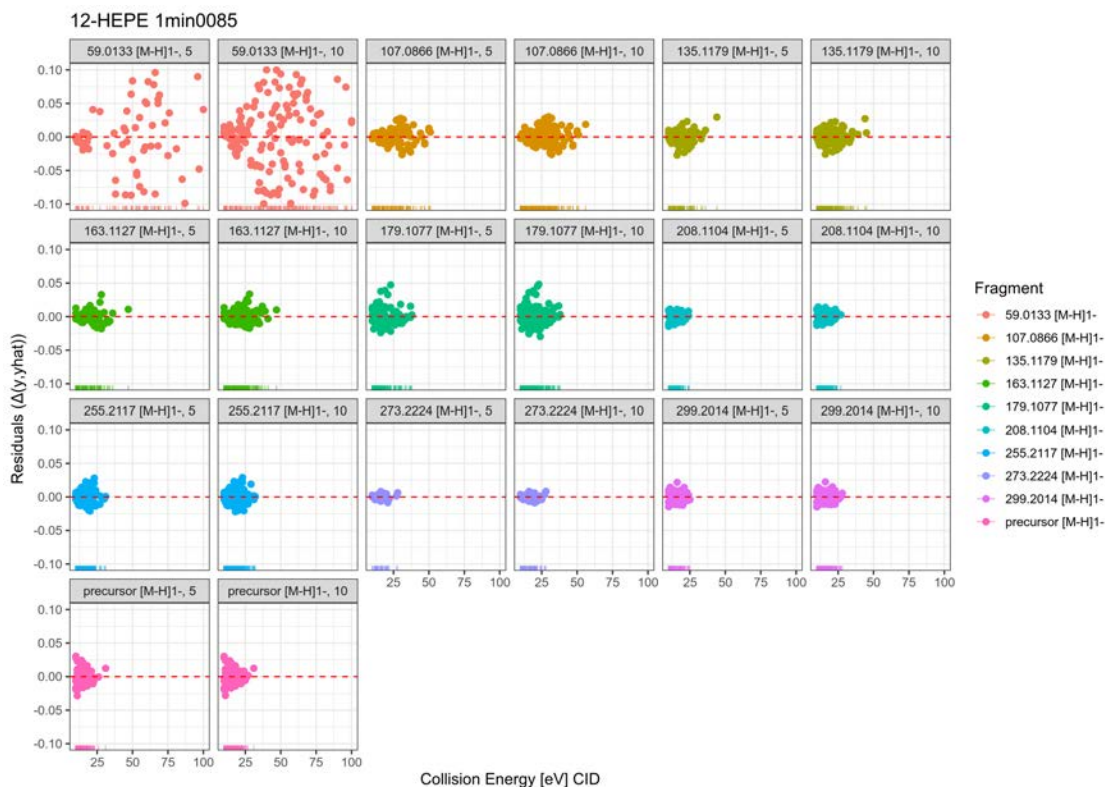

Figure 32. Residuals of nonlinear fit

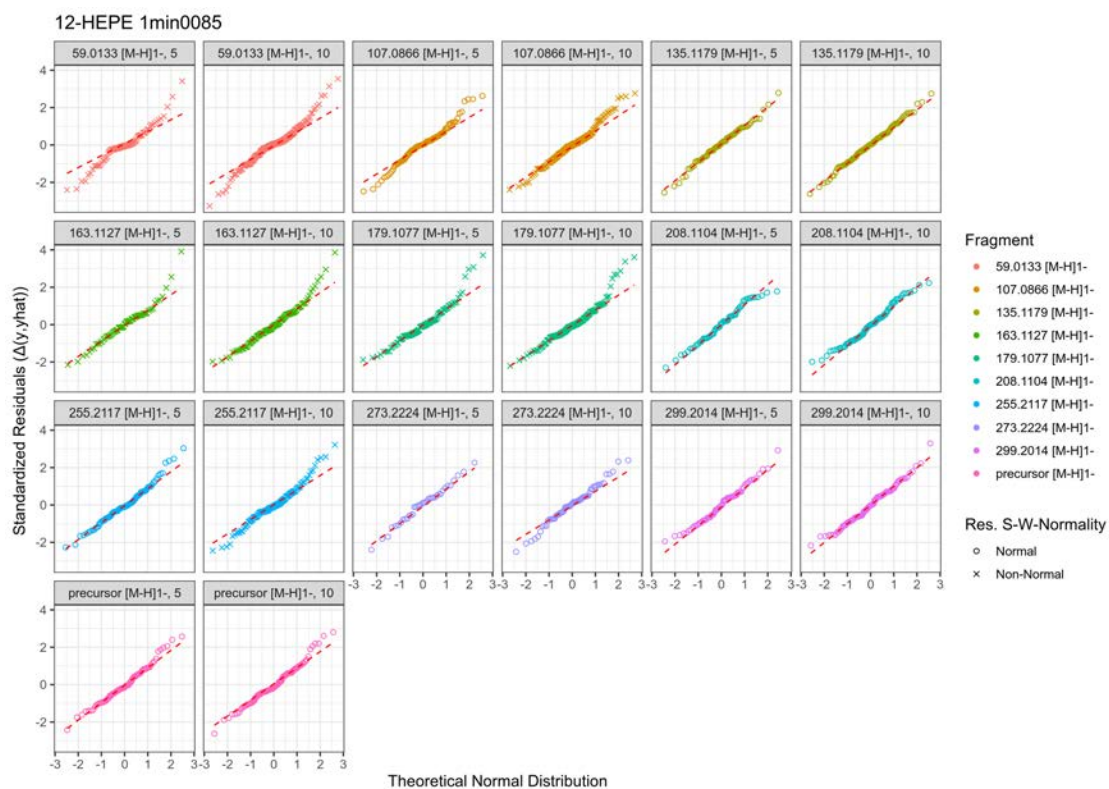

Figure 33. Quantile-quantile plot of residuals

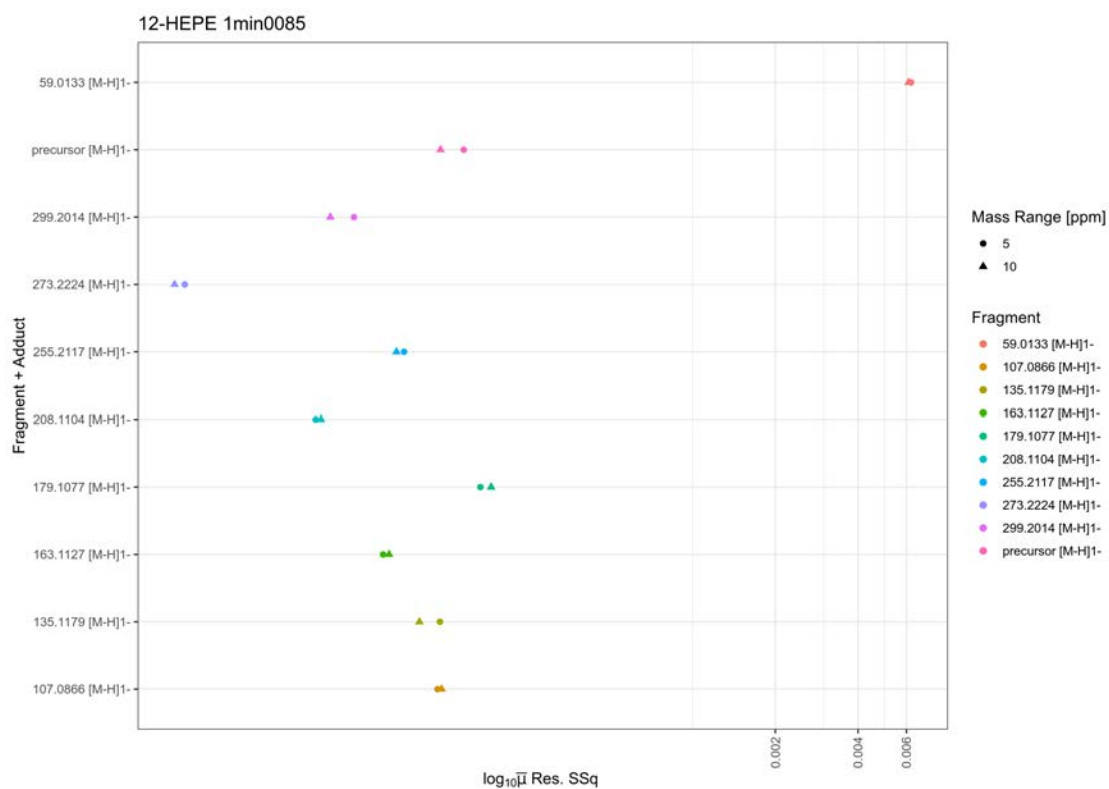

Figure 34. Normalized sum-of-squares of the residuals



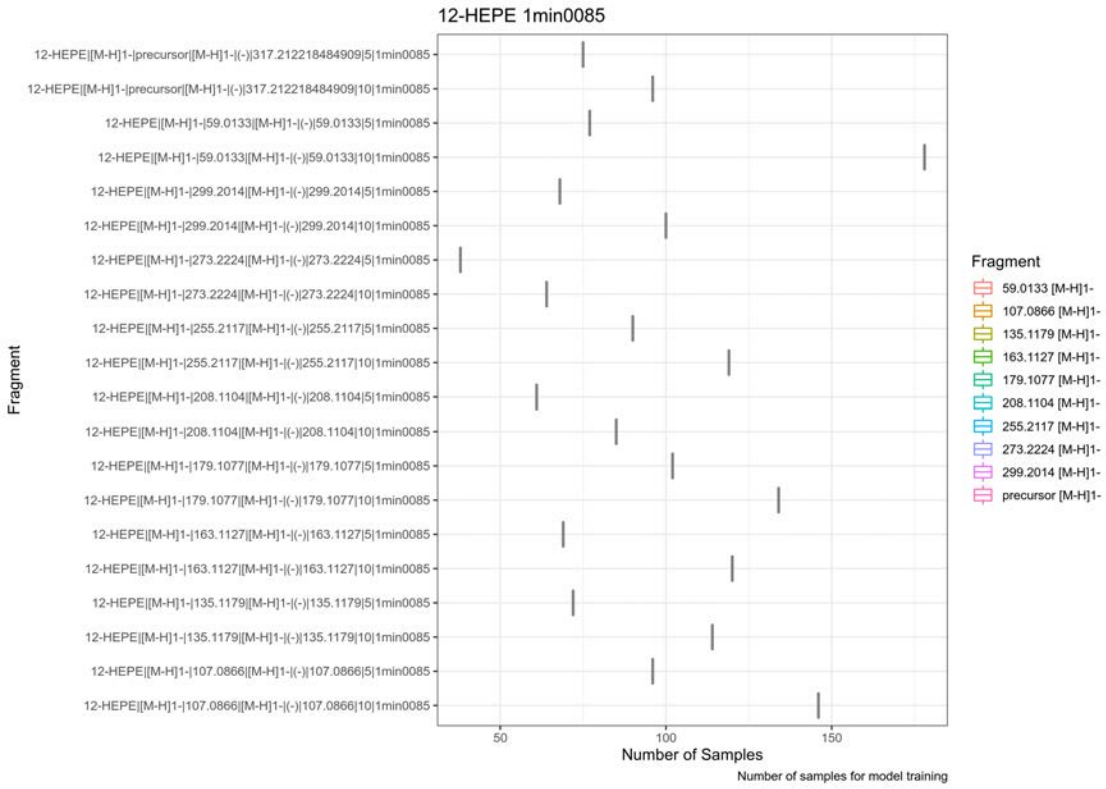

Figure 35. Number of samples used for training per combination Id

# 1.8. 12-HETE{d8} [M-H]1- 1min0088

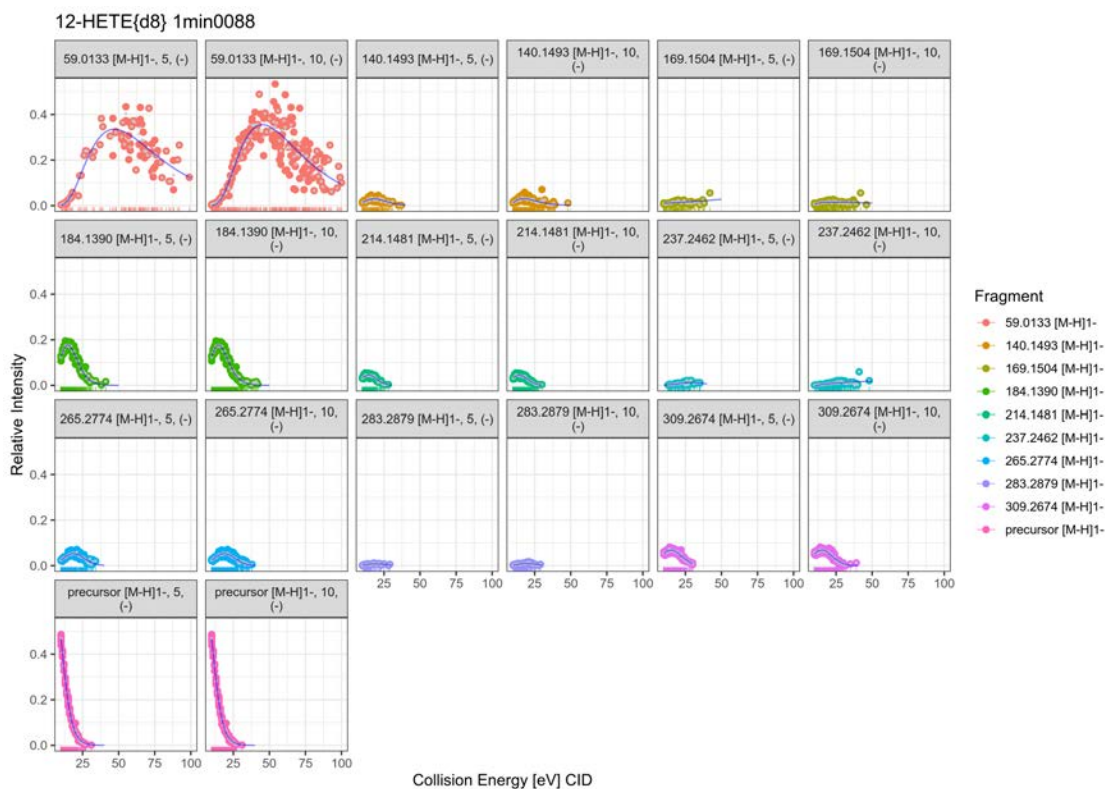

Figure 36. Nonlinear fit

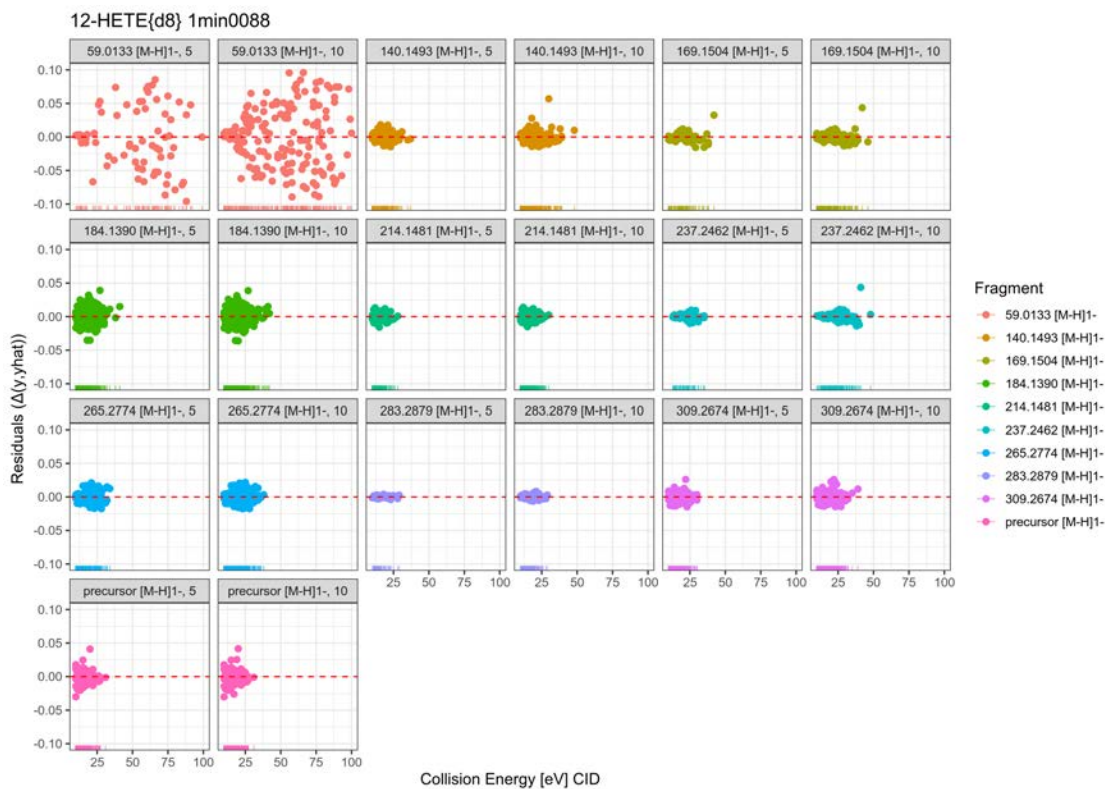

Figure 37. Residuals of nonlinear fit

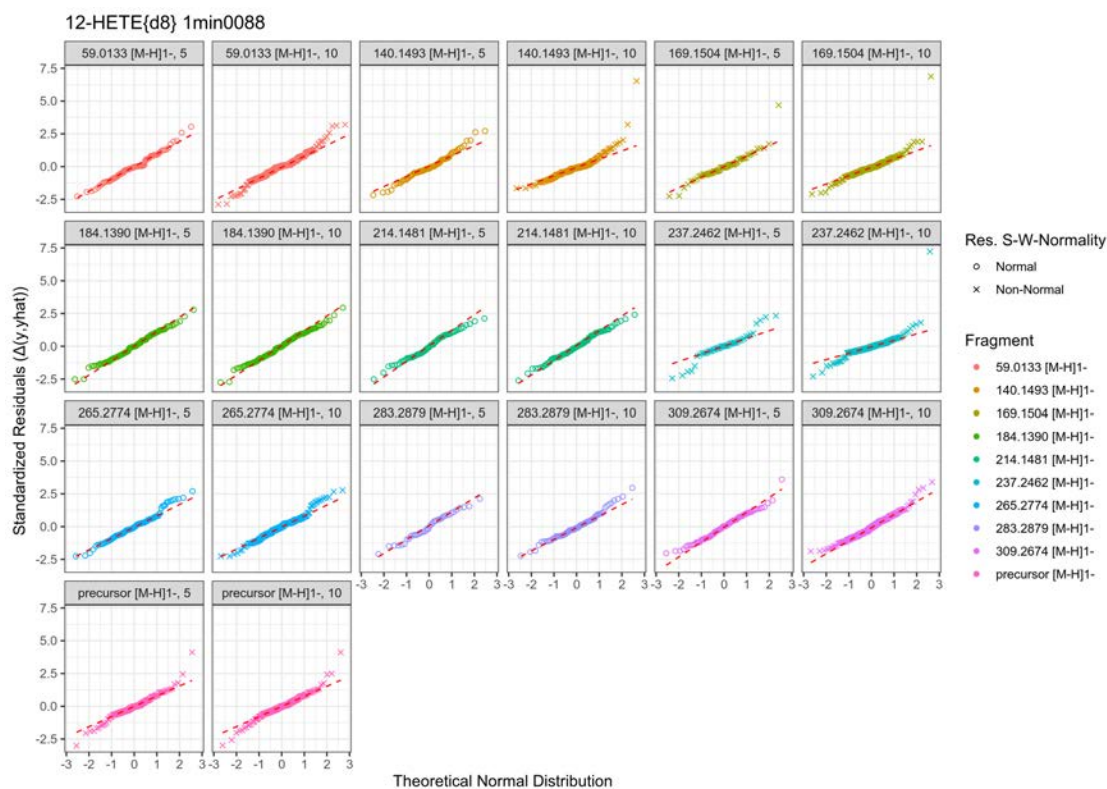

Figure 38. Quantile-quantile plot of residuals

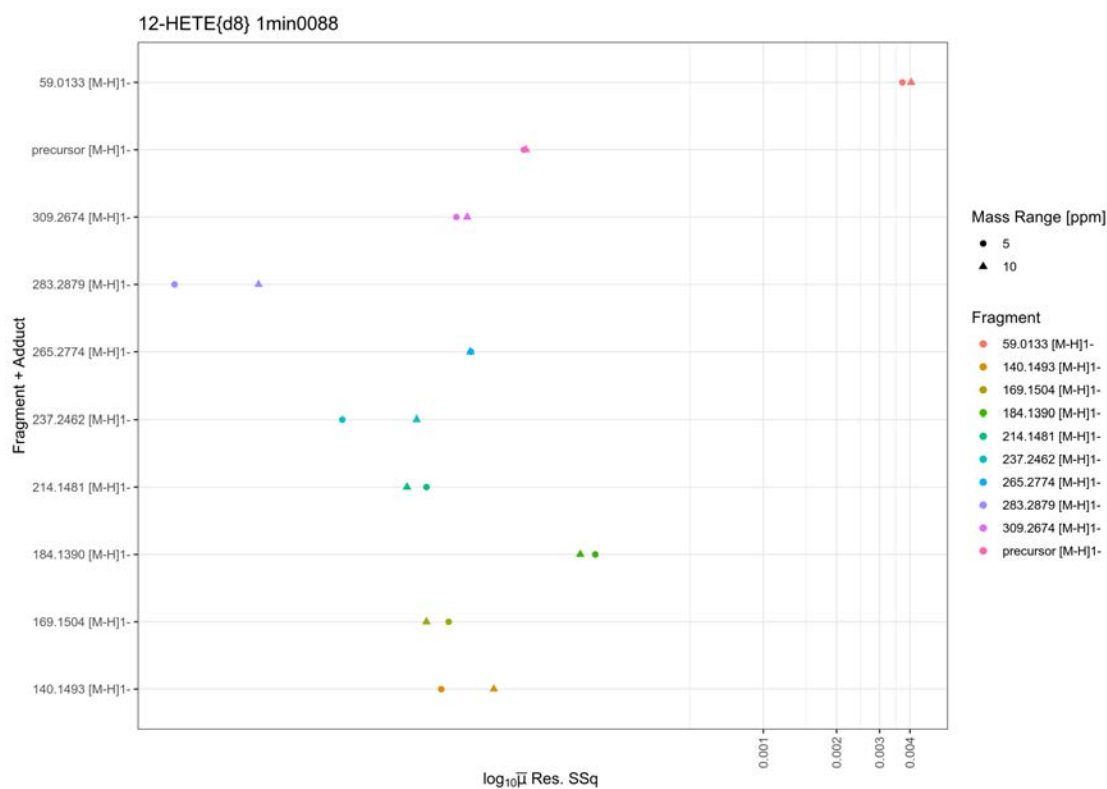

Figure 39. Normalized sum-of-squares of the residuals

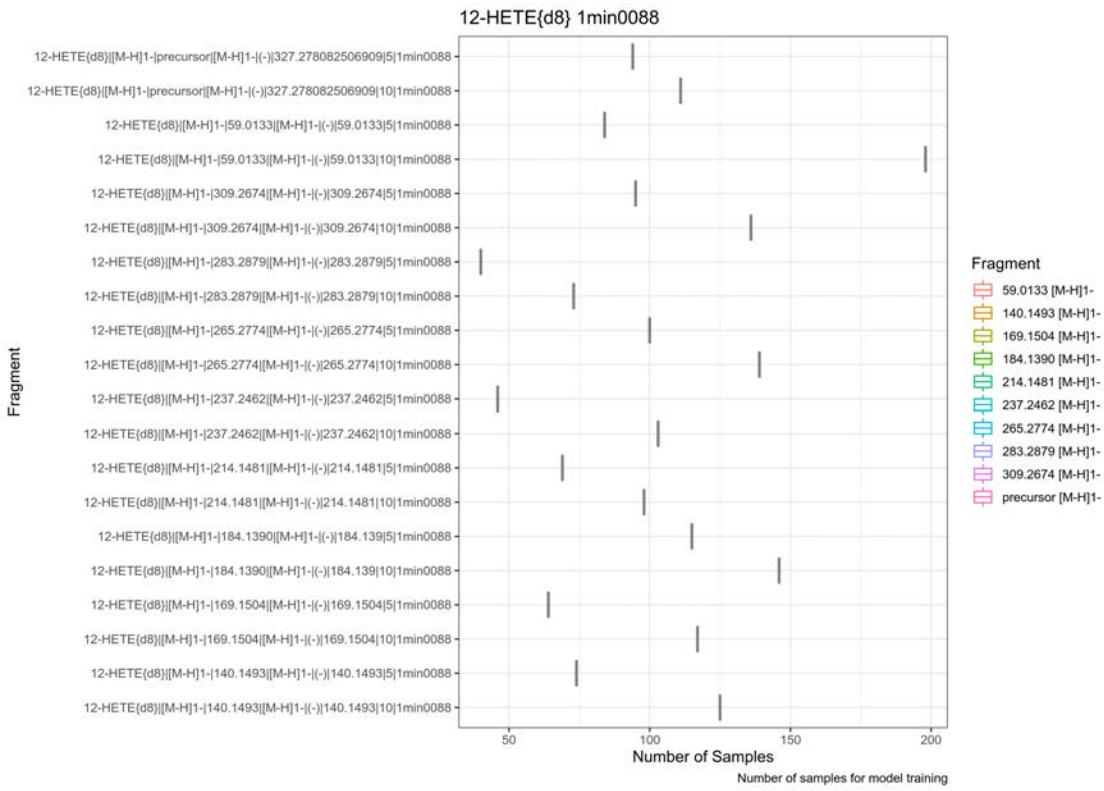

Figure 40. Number of samples used for training per combination Id

# 1.9. 12-HHTrE [M-H]1- 1min0089

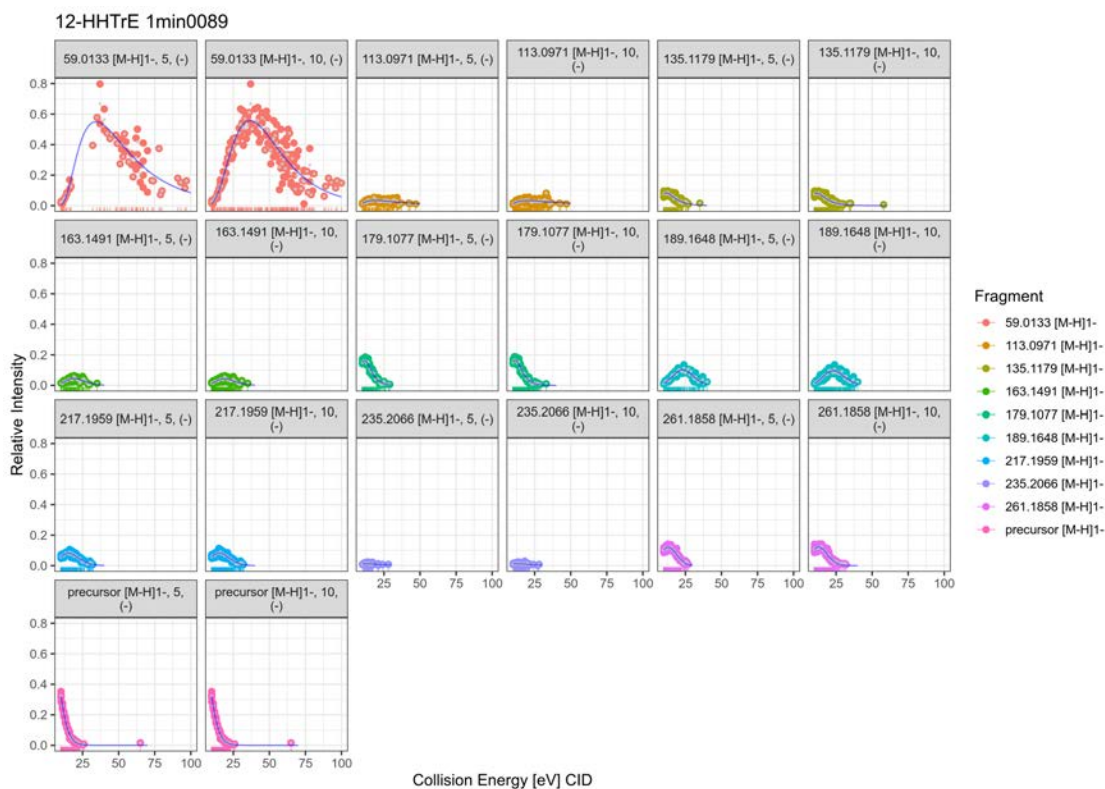

Figure 41. Nonlinear fit

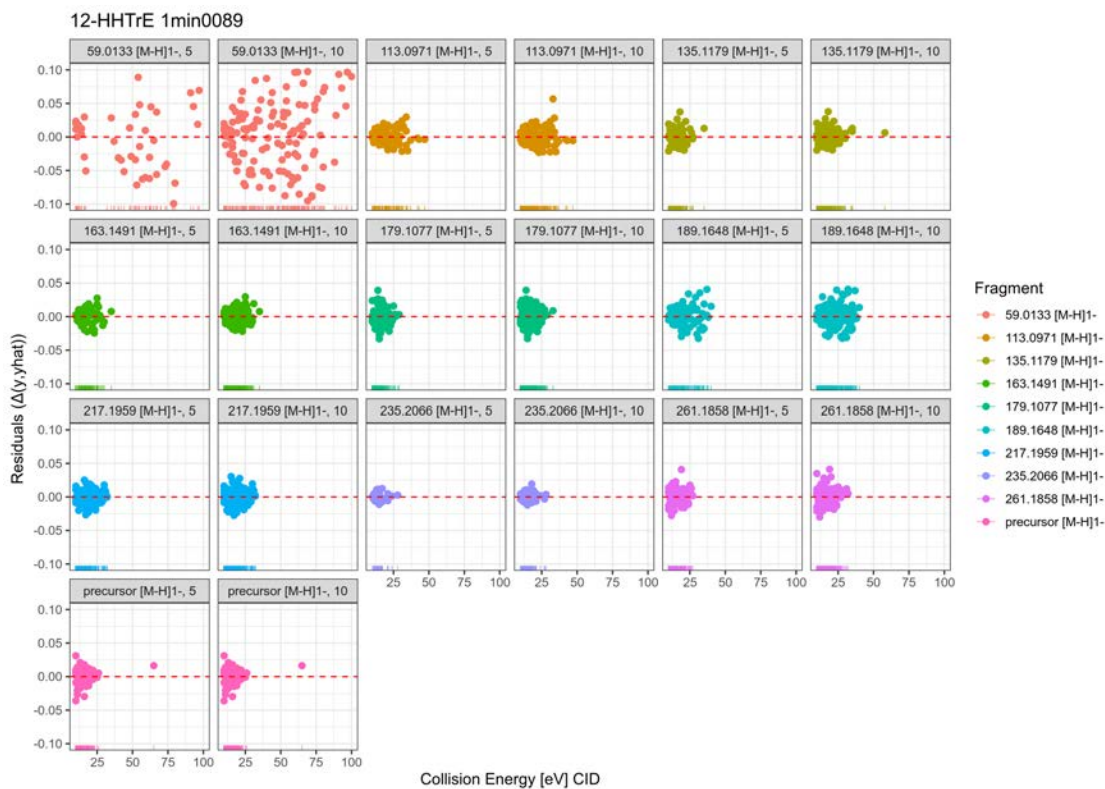

Figure 42. Residuals of nonlinear fit



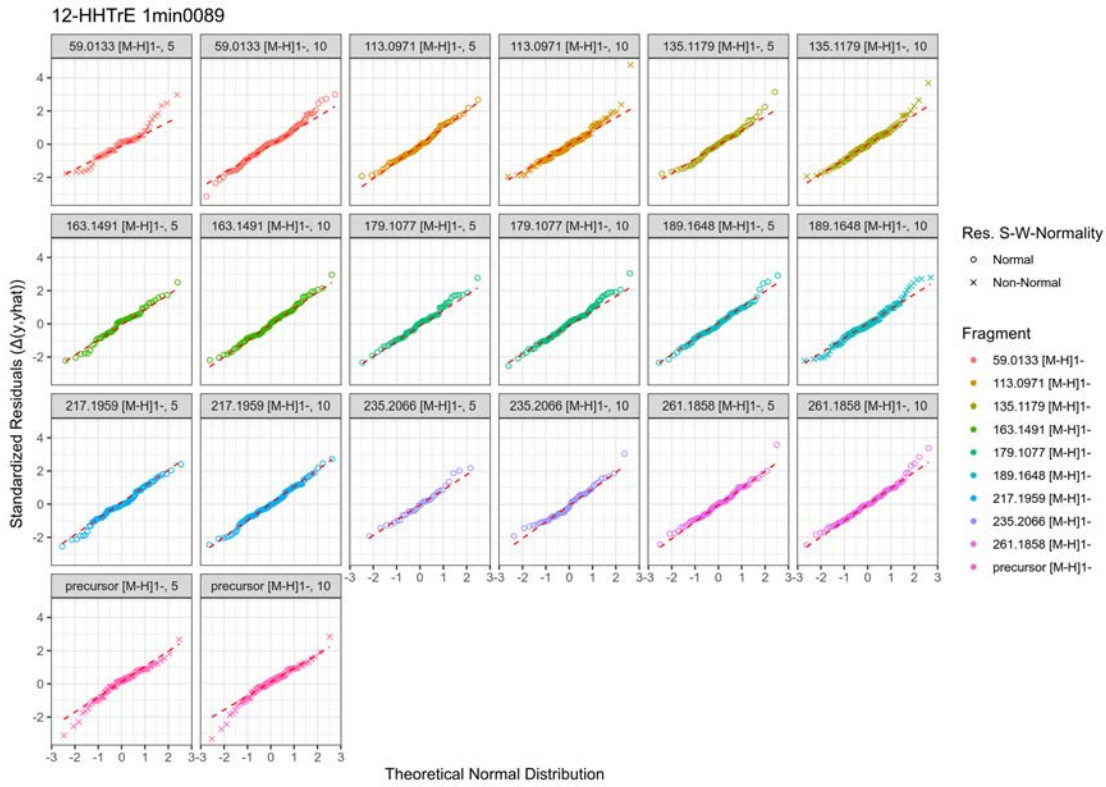

Figure 43. Quantile-quantile plot of residuals

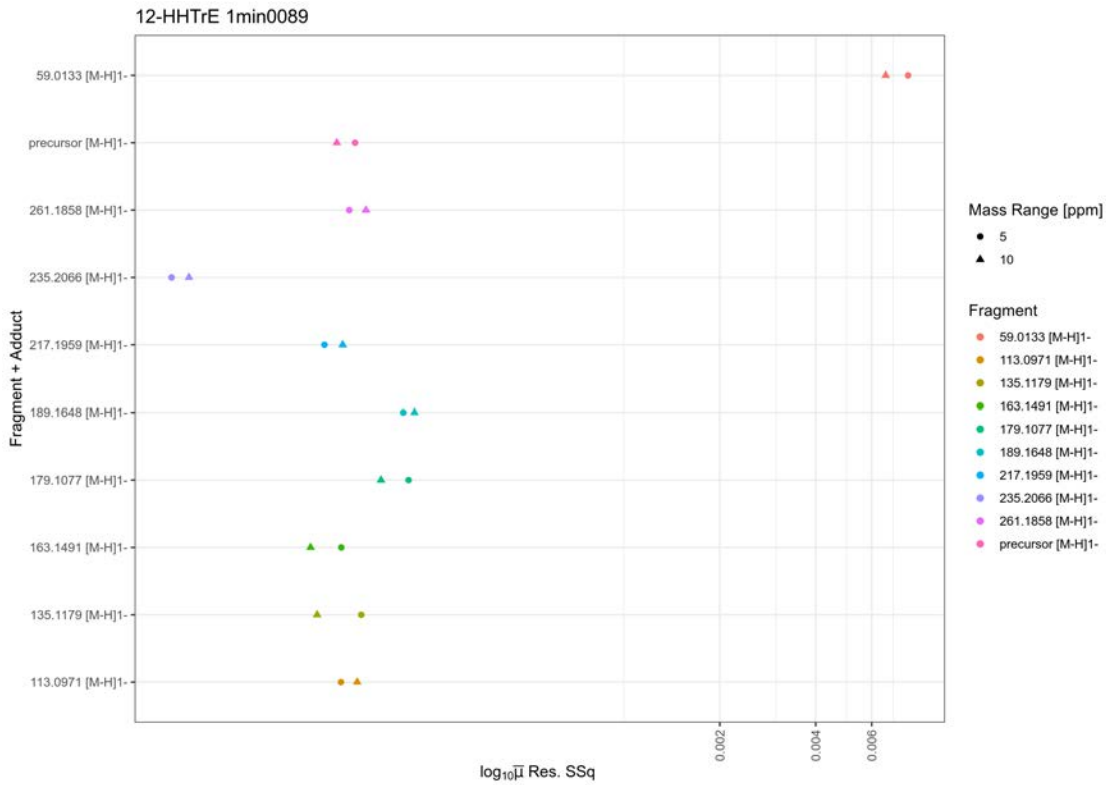

Figure 44. Normalized sum-of-squares of the residuals



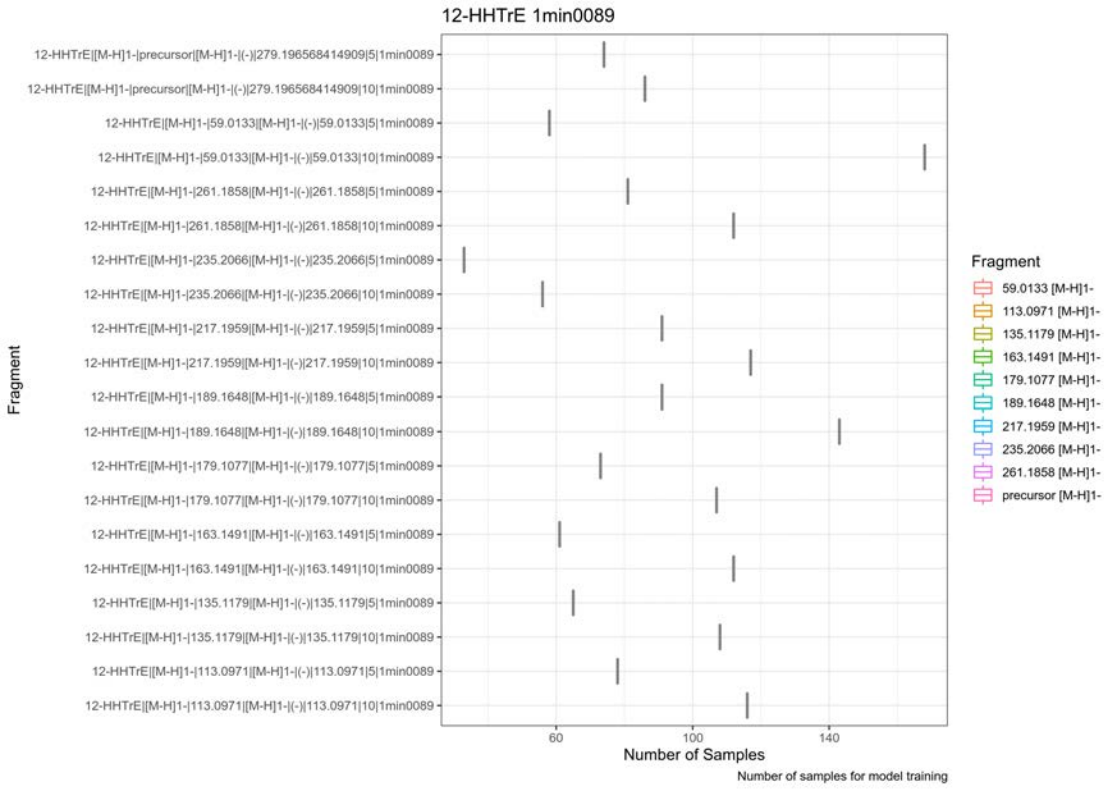

Figure 45. Number of samples used for training per combination Id

# 1.10. 12-OxoETE [M-H]1- 1min0165

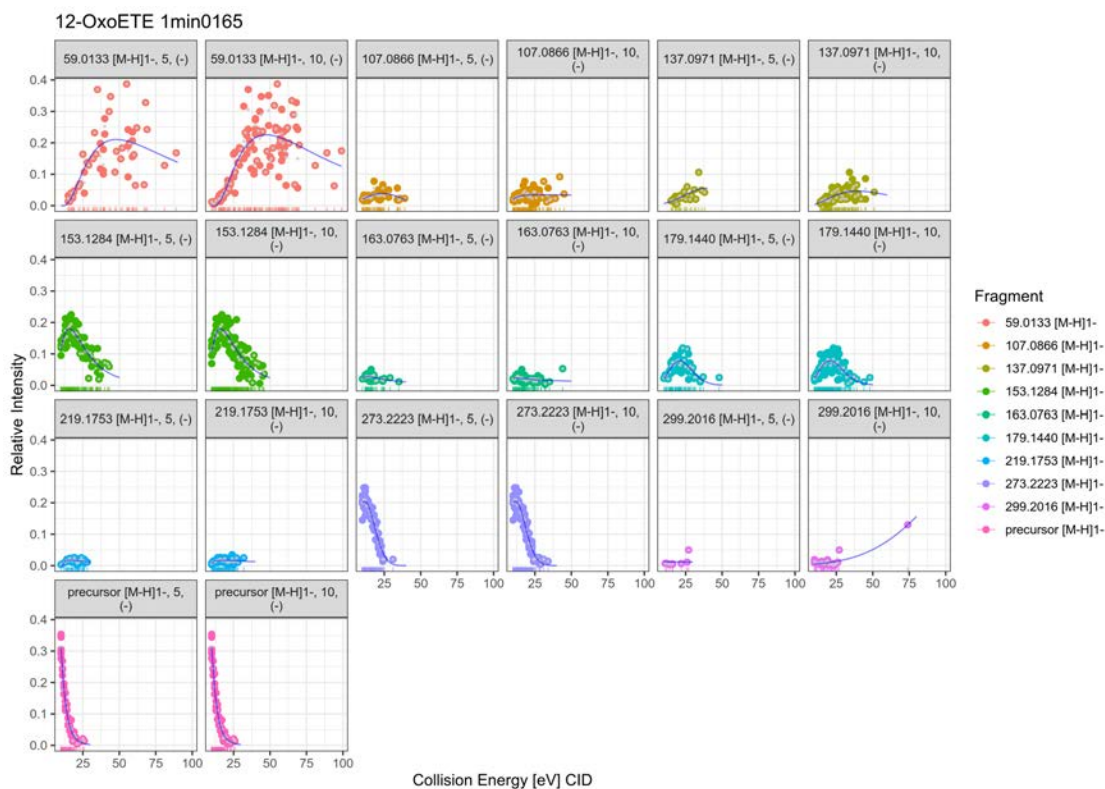

Figure 46. Nonlinear fit

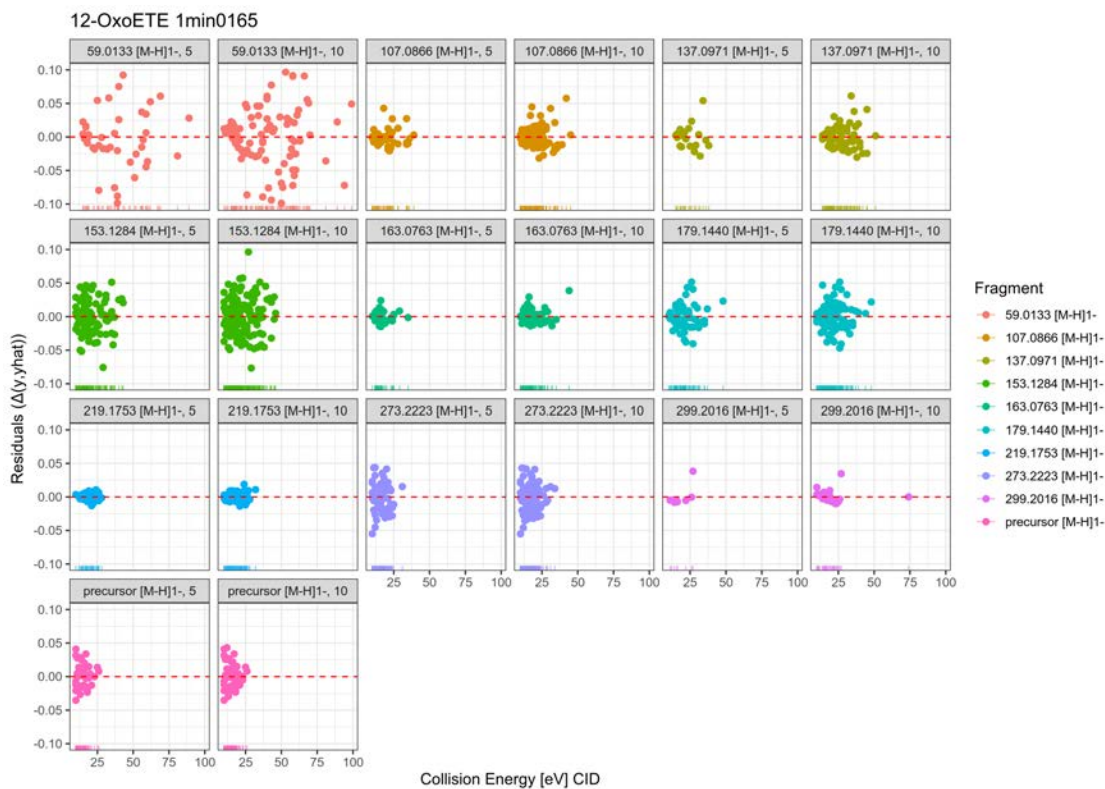

Figure 47. Residuals of nonlinear fit

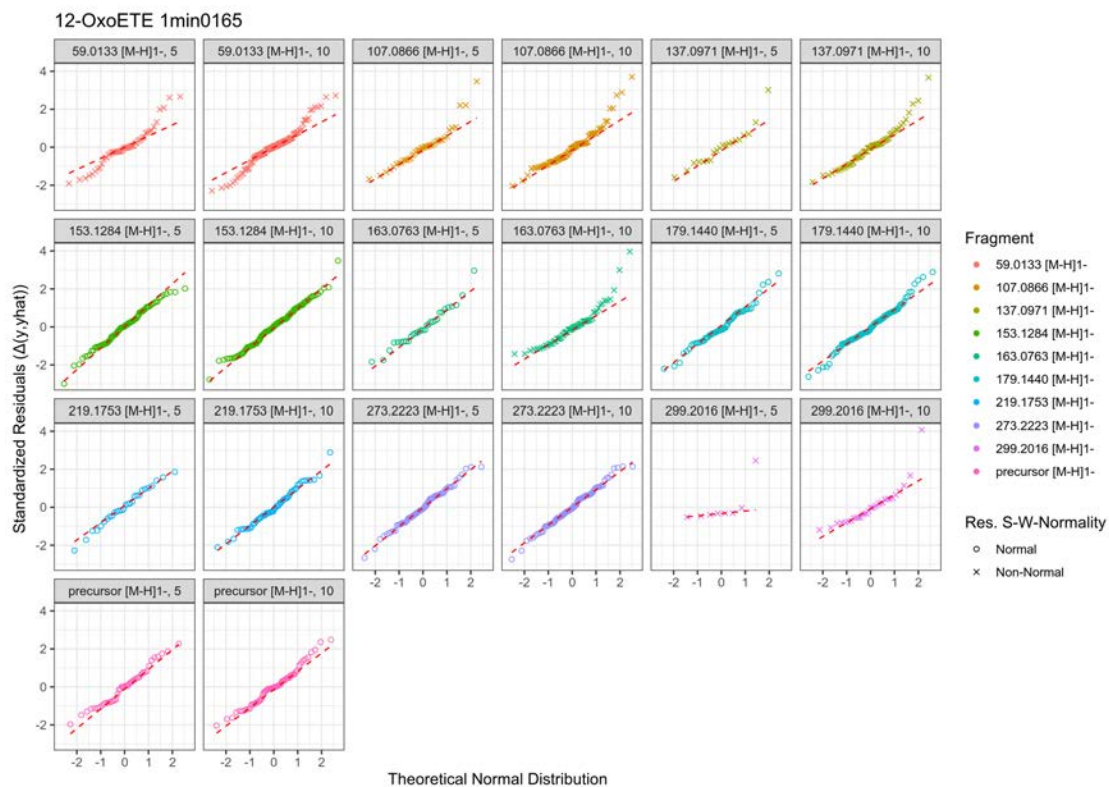

Figure 48. Quantile-quantile plot of residuals

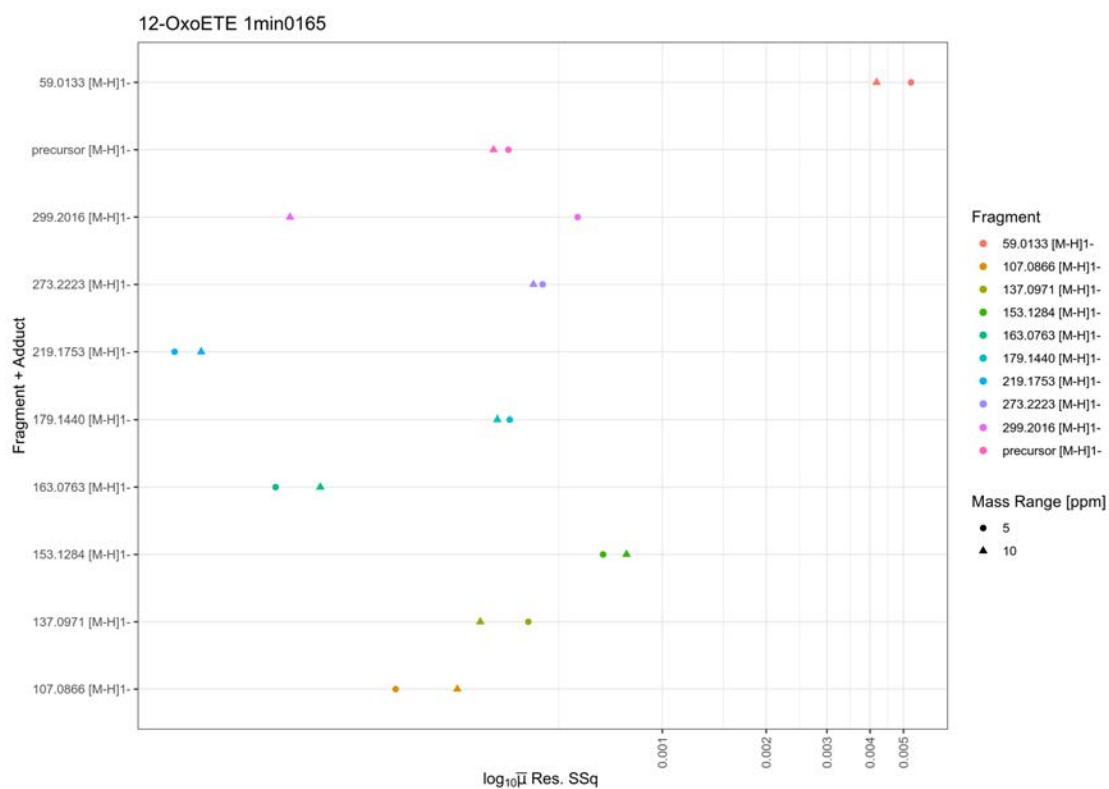

Figure 49. Normalized sum-of-squares of the residuals

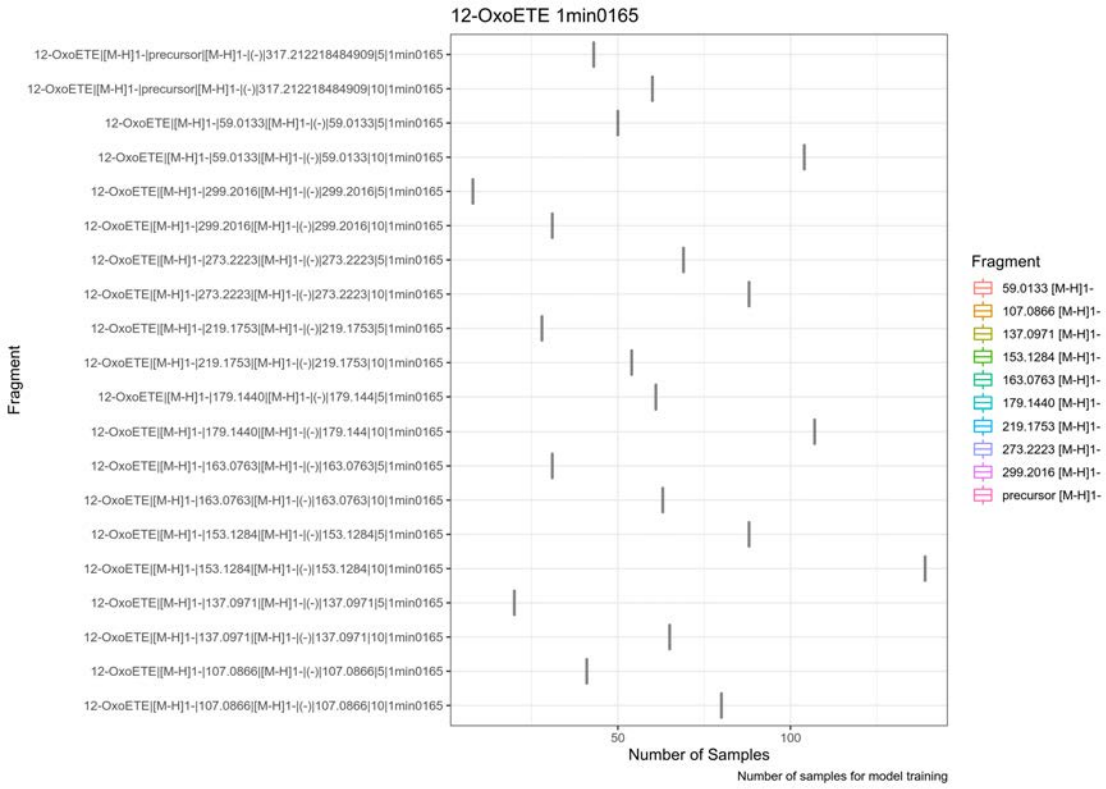

*Figure 50. Number of samples used for training per combination Id*

# 1.11. 13-HODE{d4} [M-H]1- 1min0095

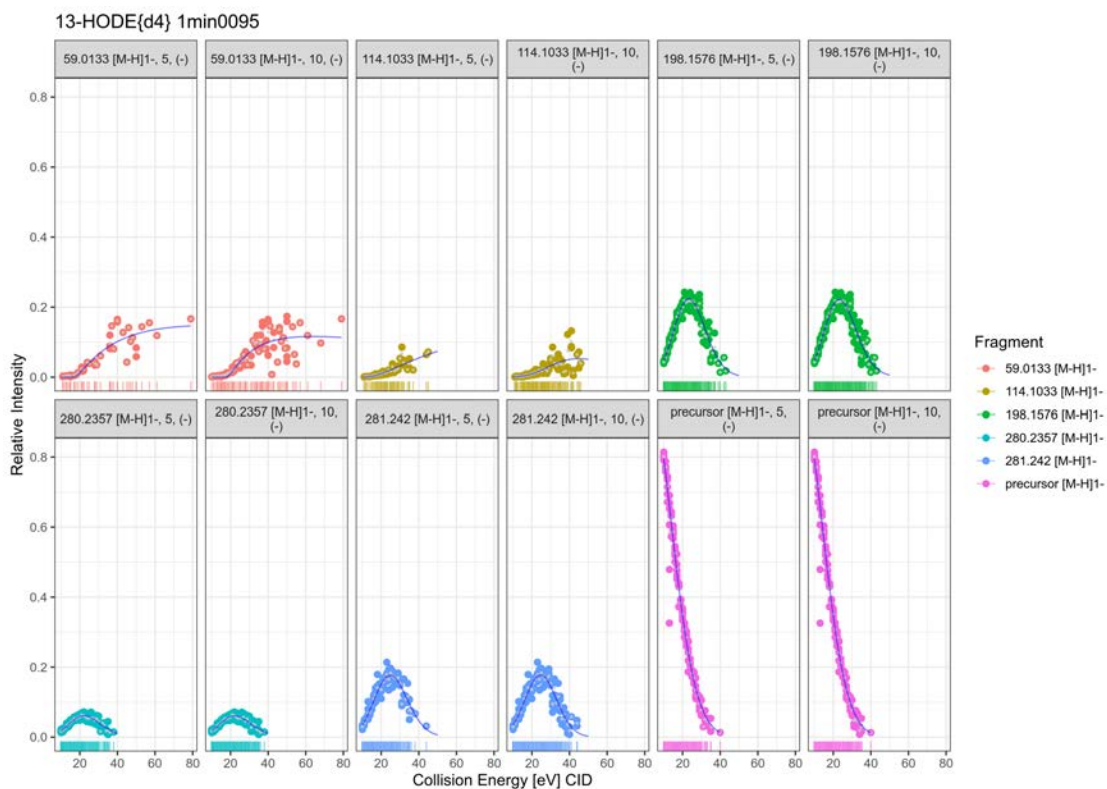

Figure 51. Nonlinear fit

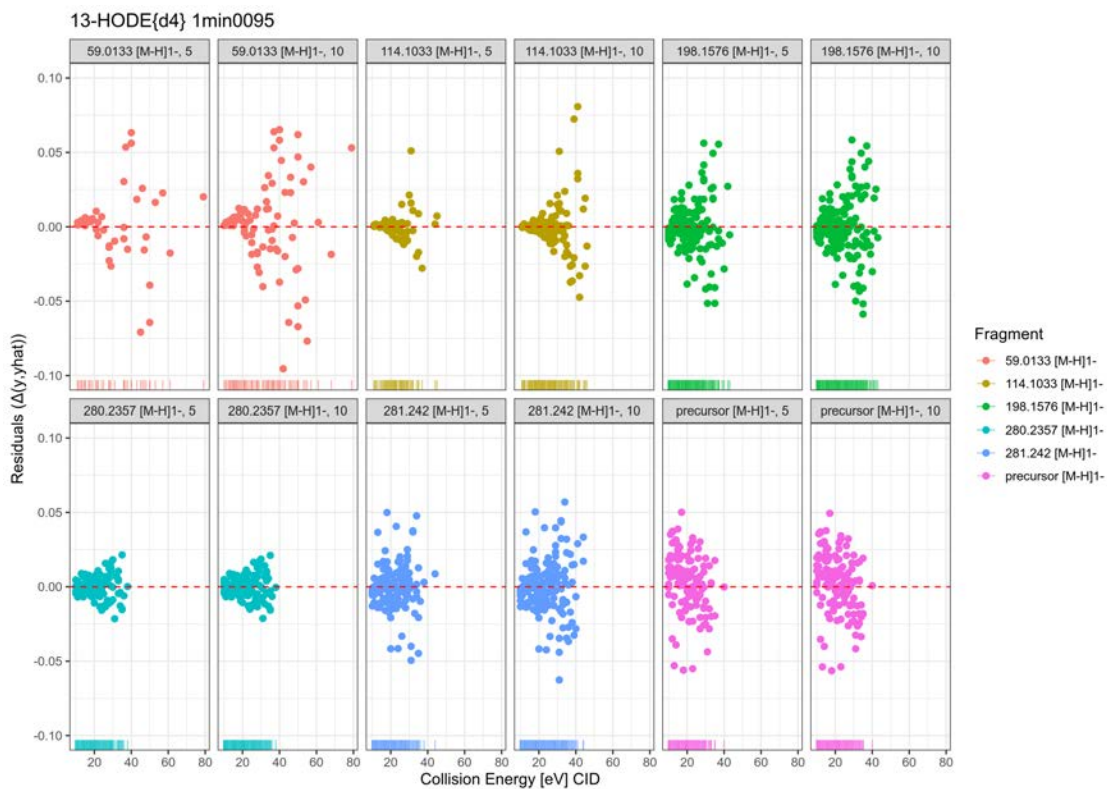

Figure 52. Residuals of nonlinear fit



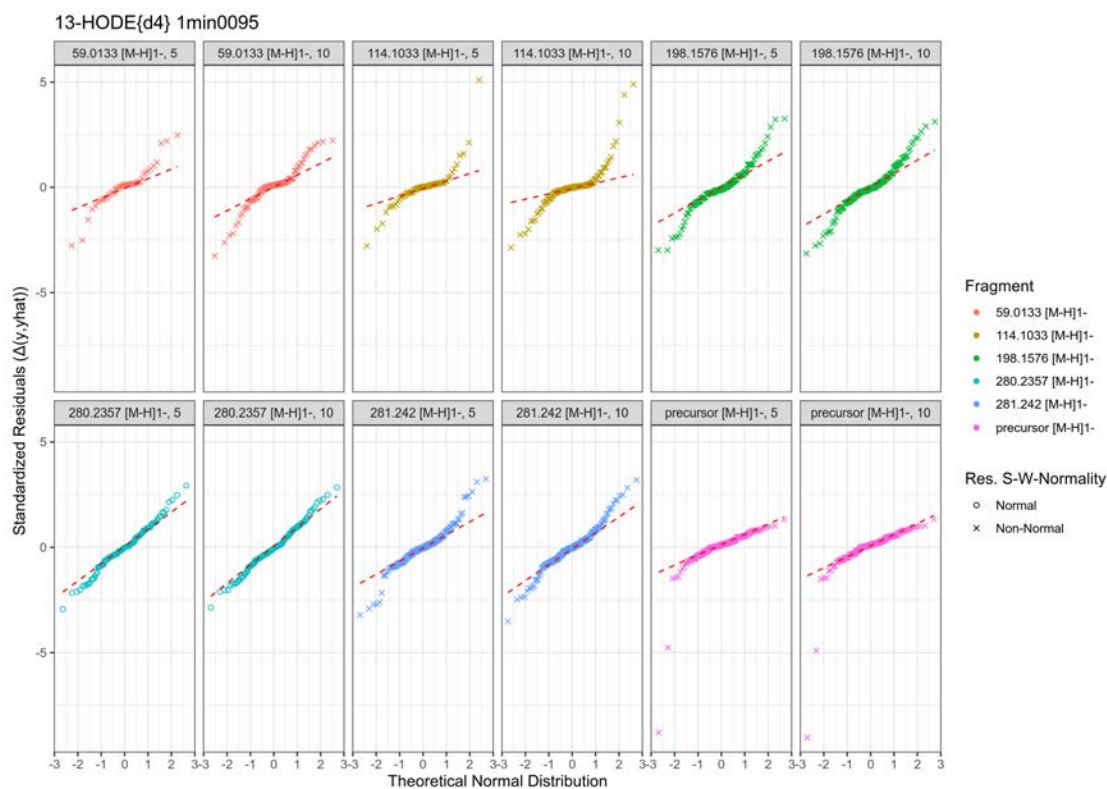

Figure 53. Quantile-quantile plot of residuals

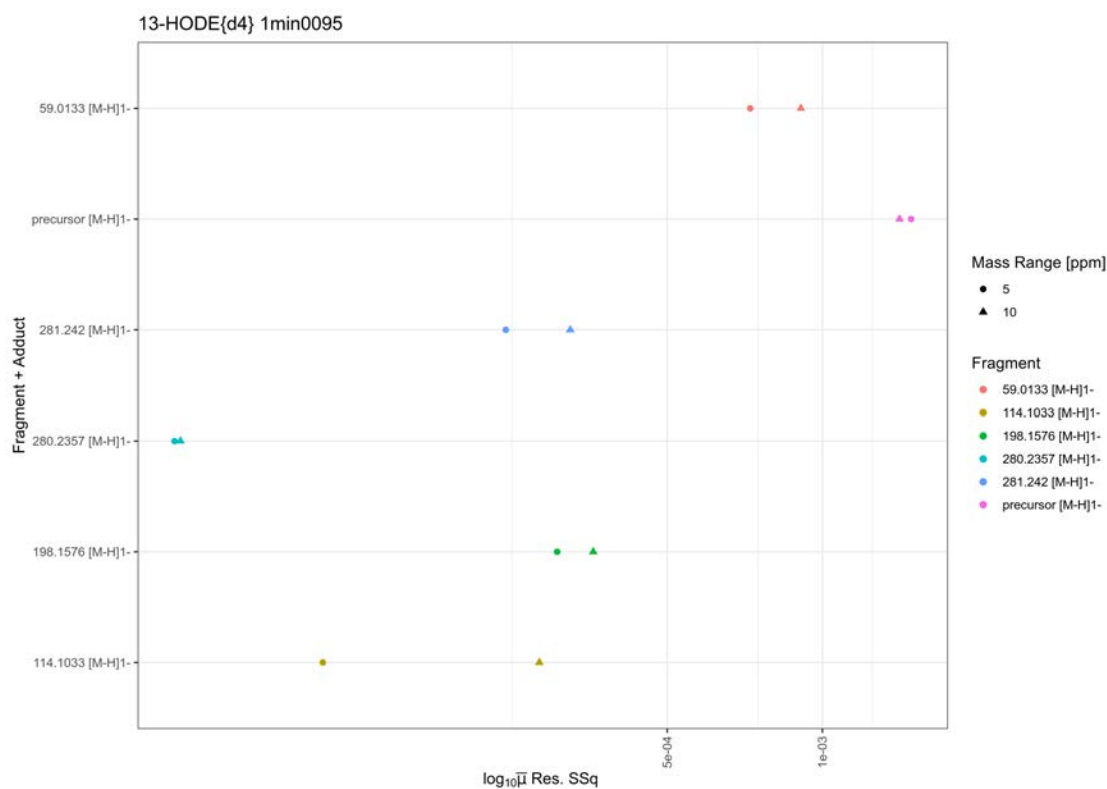

Figure 54. Normalized sum-of-squares of the residuals

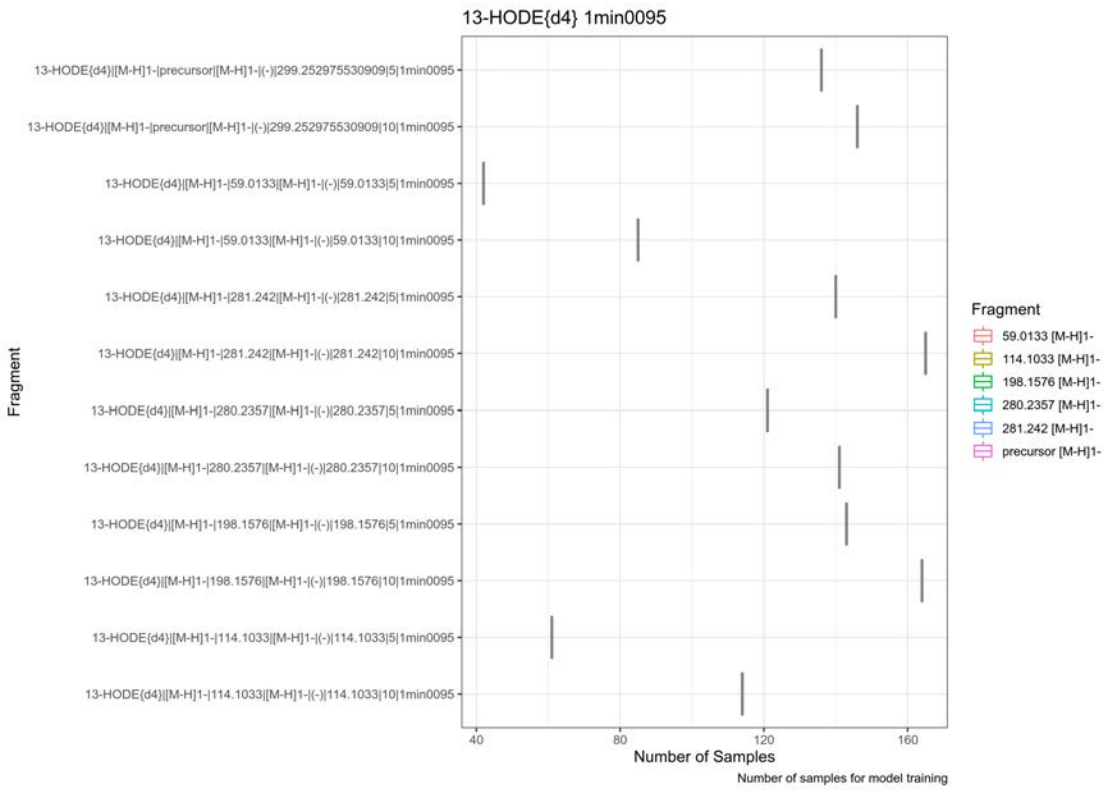

Figure 55. Number of samples used for training per combination Id

# 1.12. 13-HOTrE [M-H]1- 1min0099

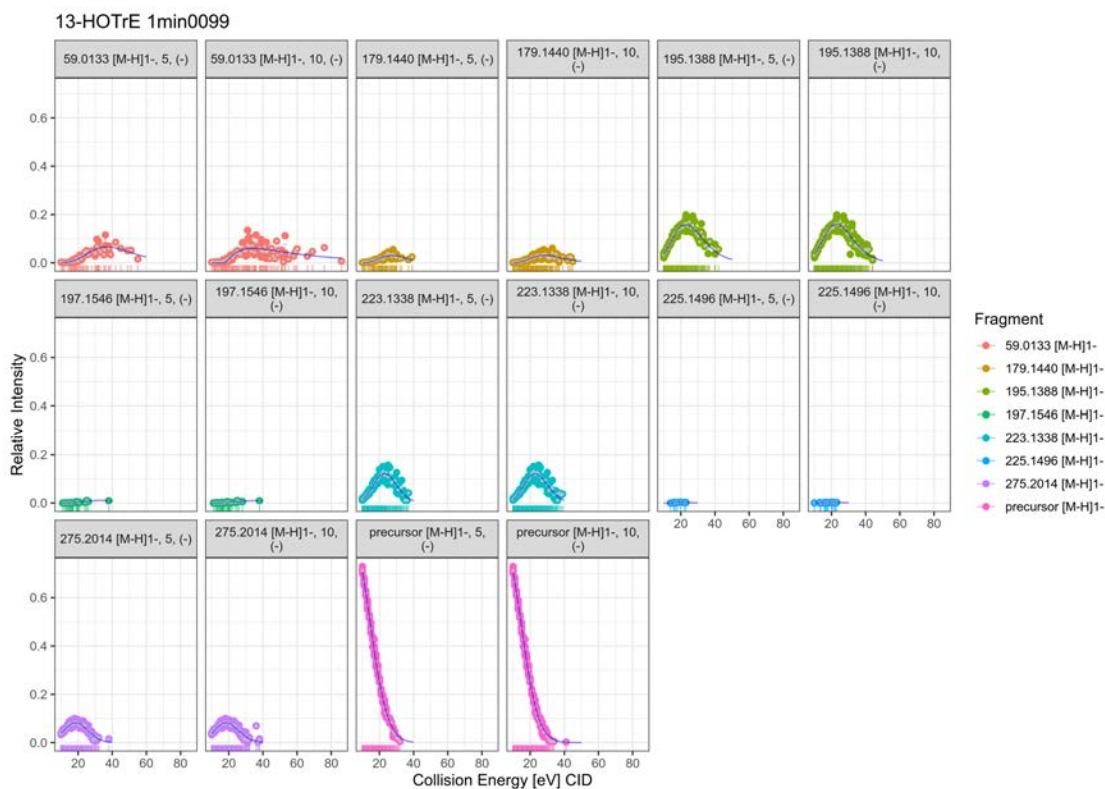

Figure 56. Nonlinear fit

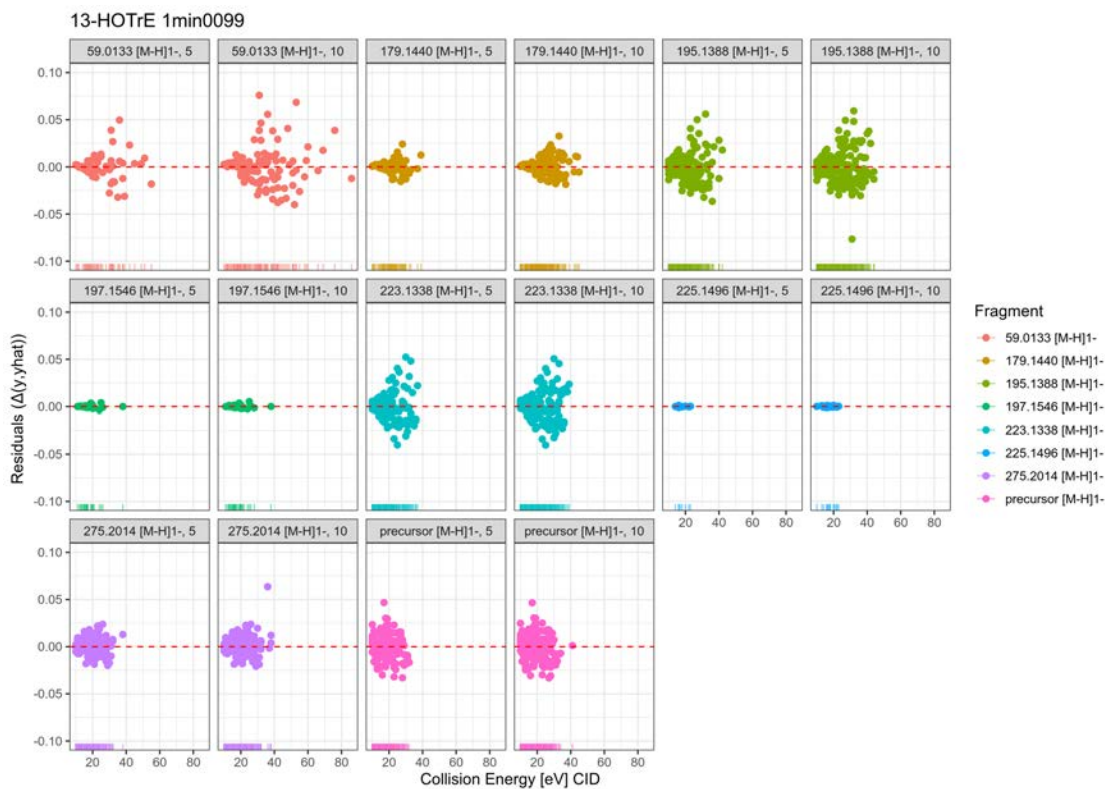

Figure 57. Residuals of nonlinear fit

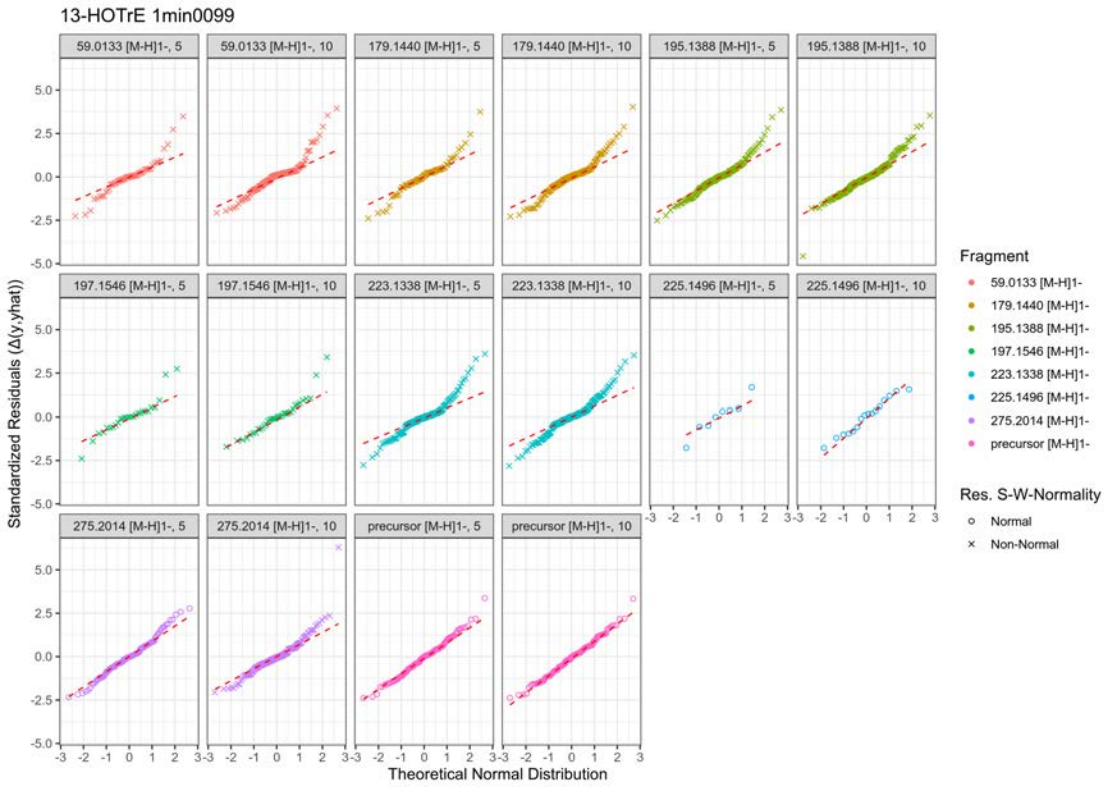

Figure 58. Quantile-quantile plot of residuals

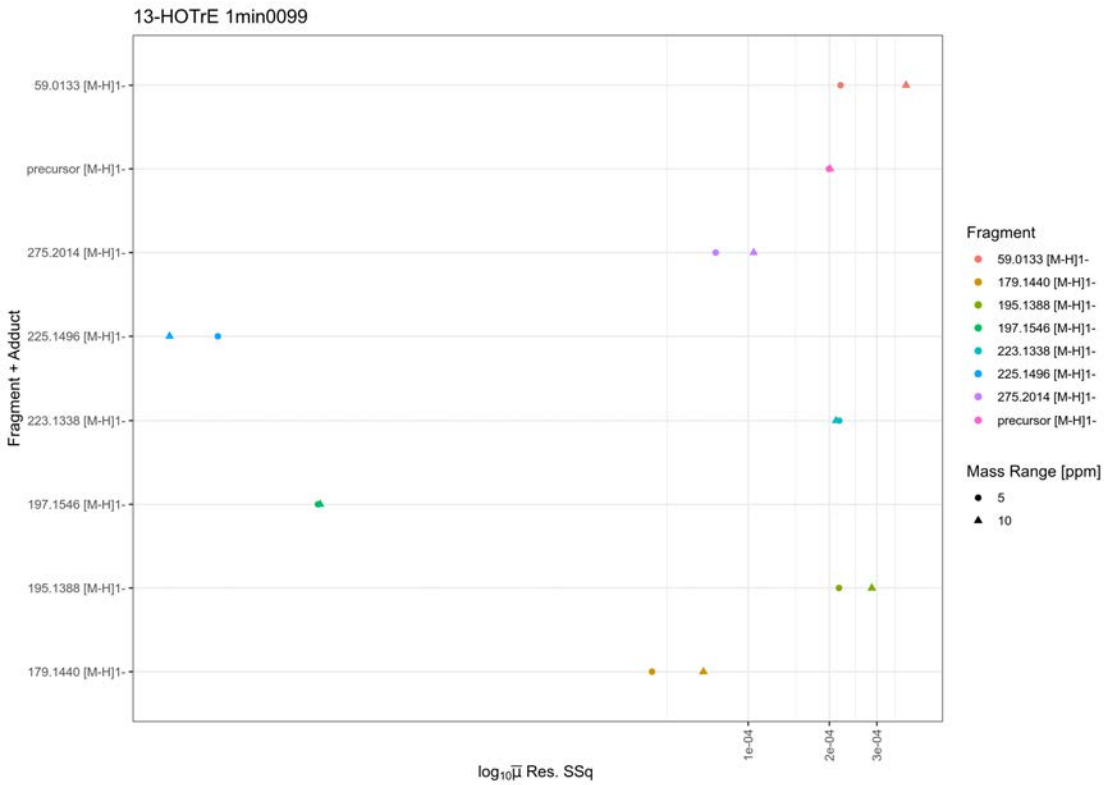

Figure 59. Normalized sum-of-squares of the residuals

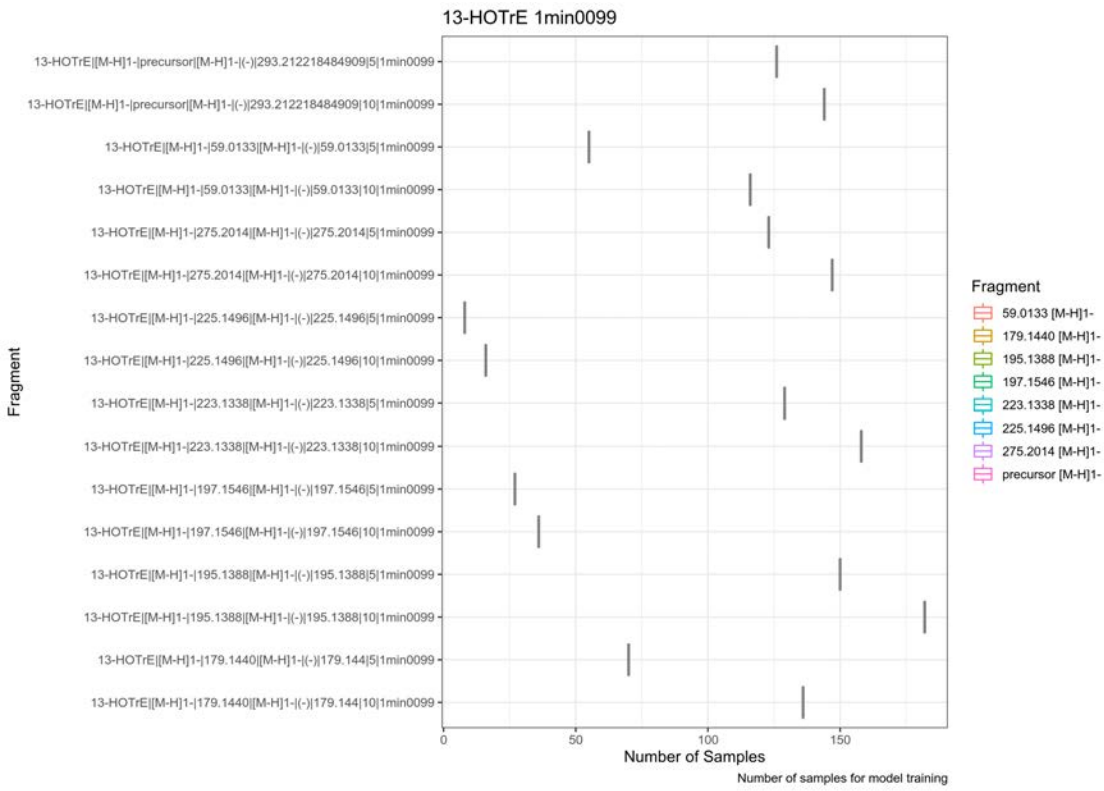

Figure 60. Number of samples used for training per combination Id



# 1.13. 14(15)-EET{d11} [M-H]1- 1min0101

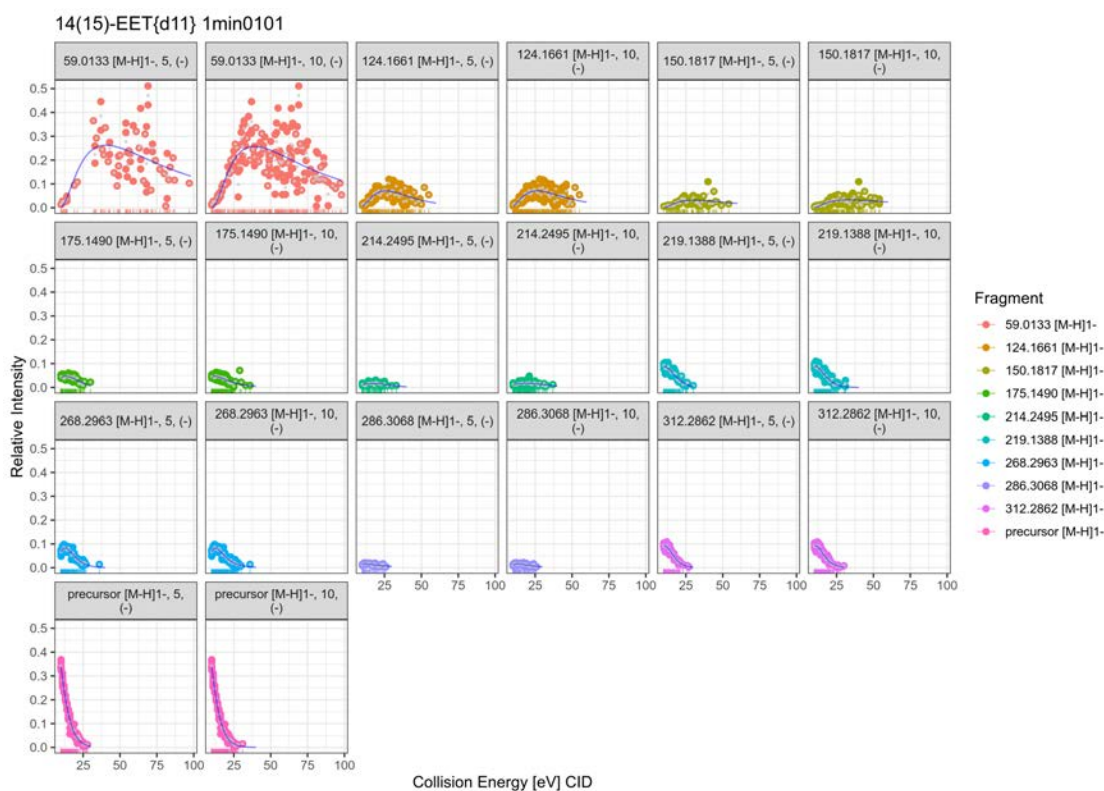

Figure 61. Nonlinear fit

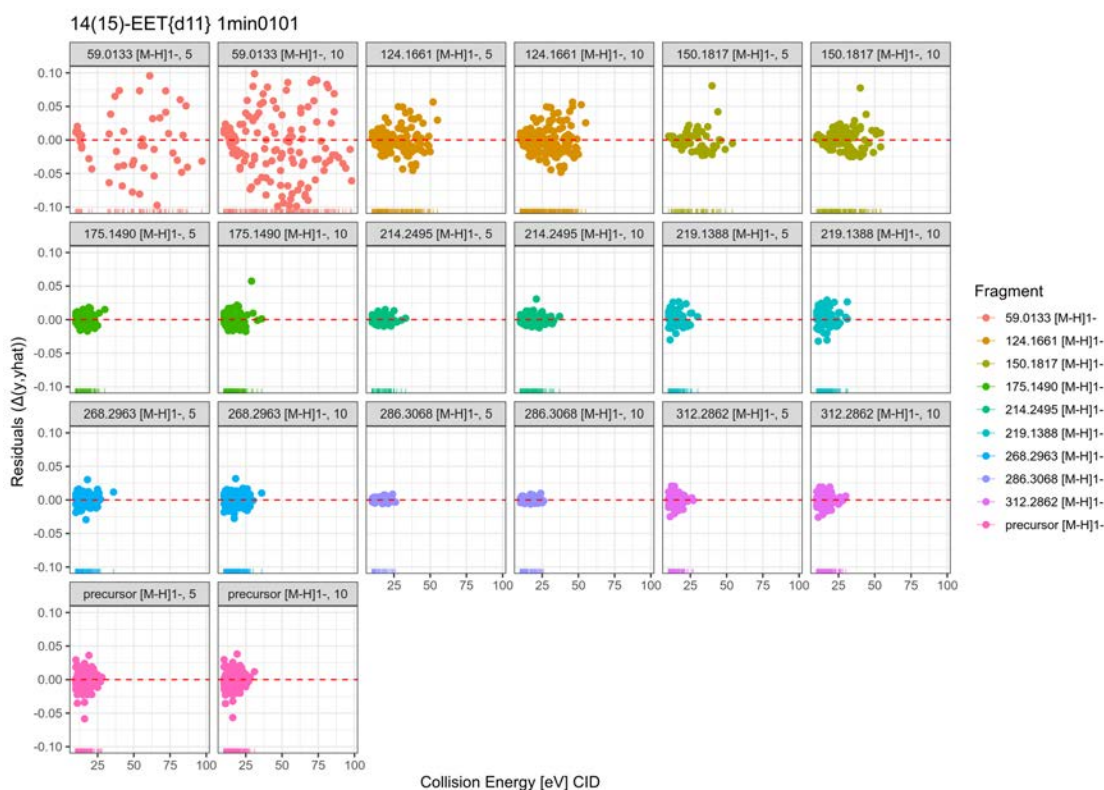

Figure 62. Residuals of nonlinear fit

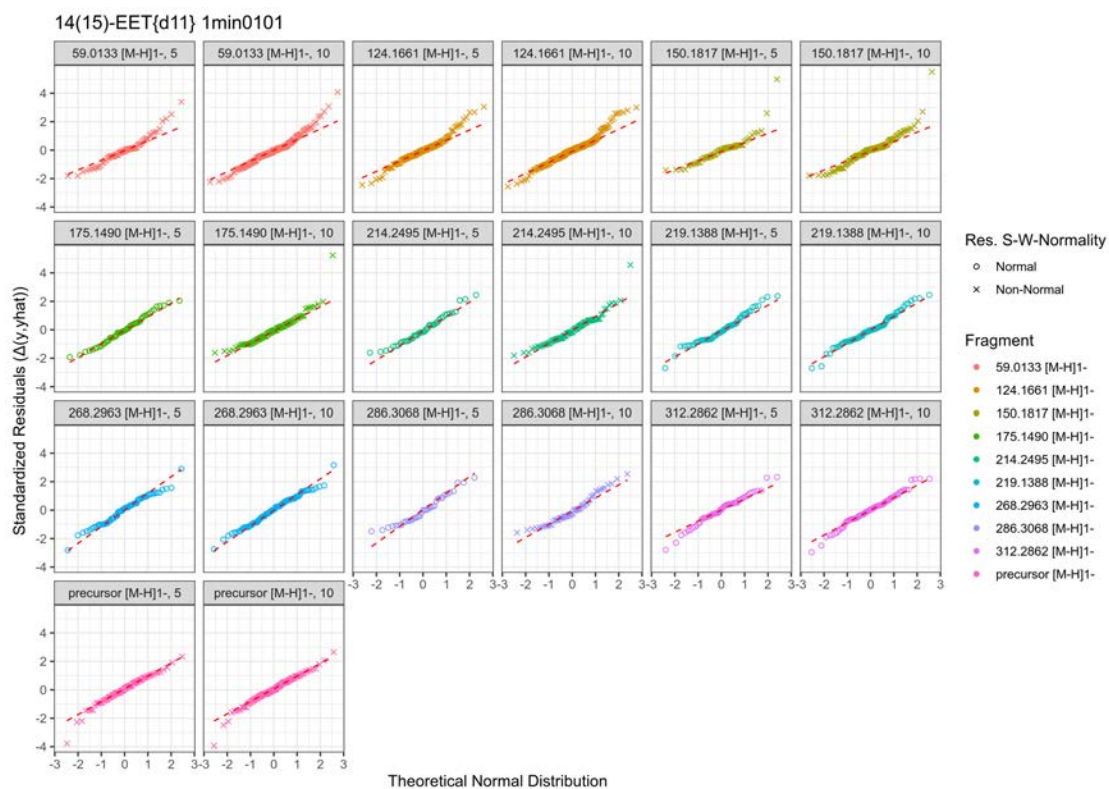

Figure 63. Quantile-quantile plot of residuals

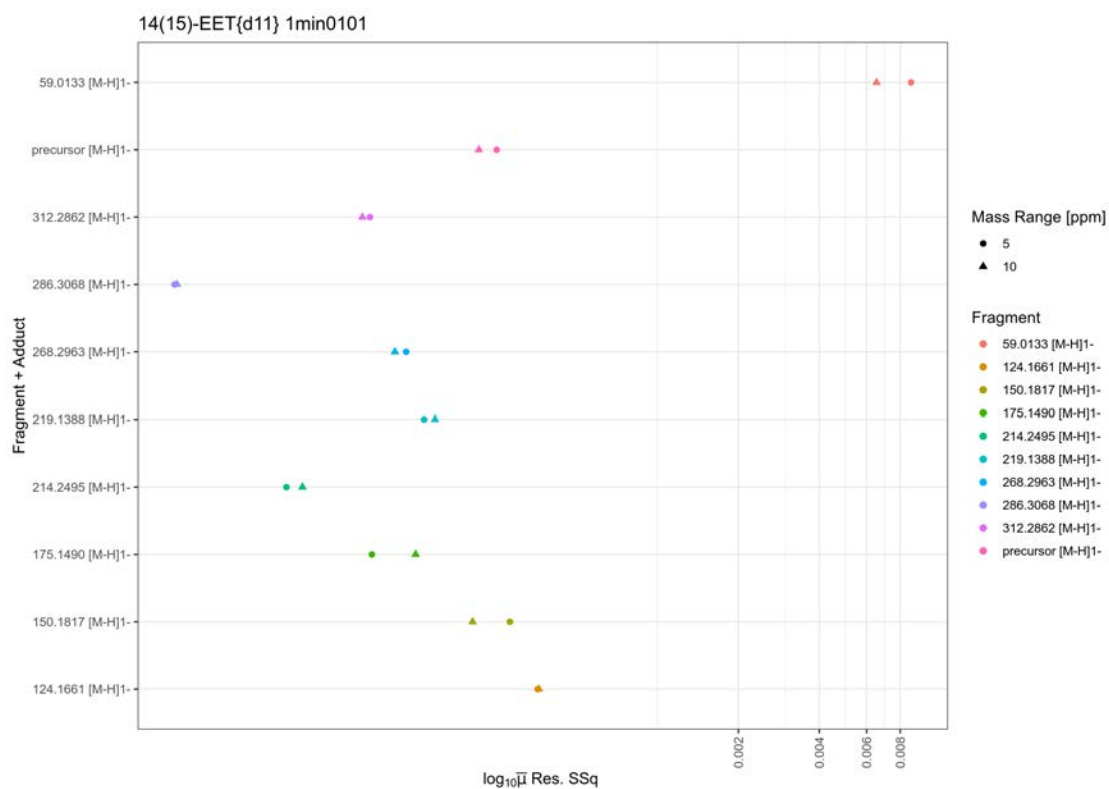

Figure 64. Normalized sum-of-squares of the residuals

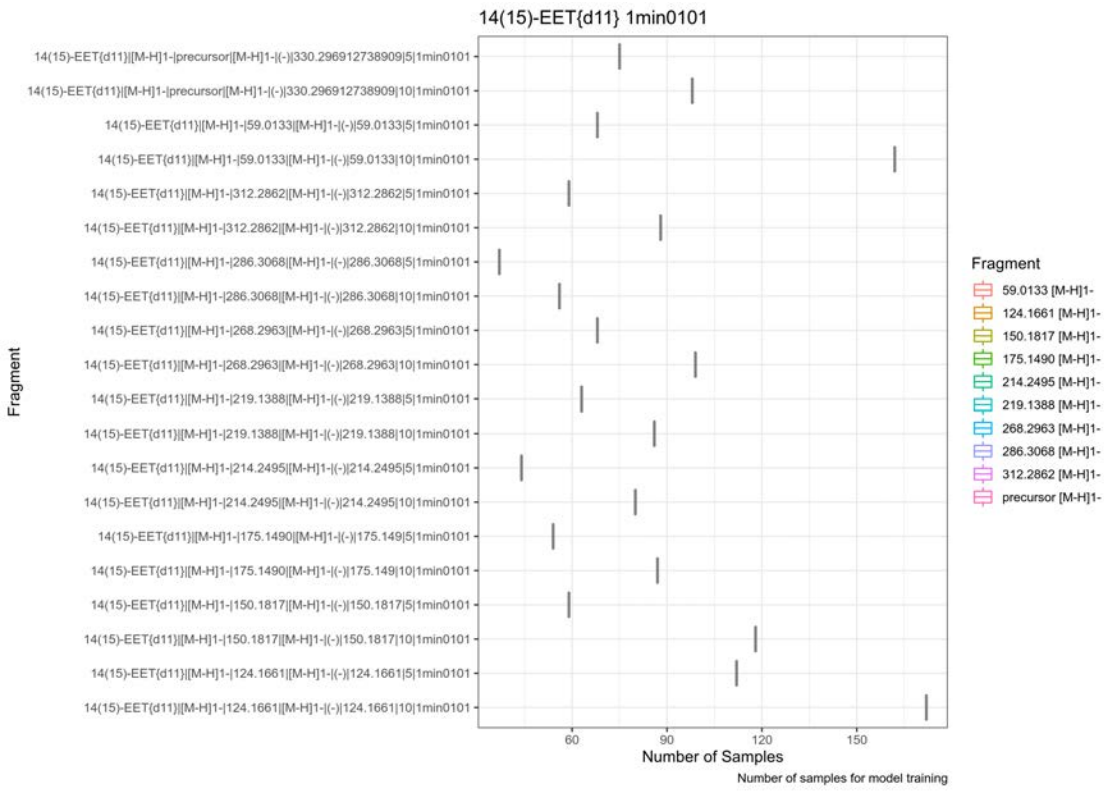

Figure 65. Number of samples used for training per combination Id

# 1.14. 14(15)-EpETE [M-H]1- 1min0104

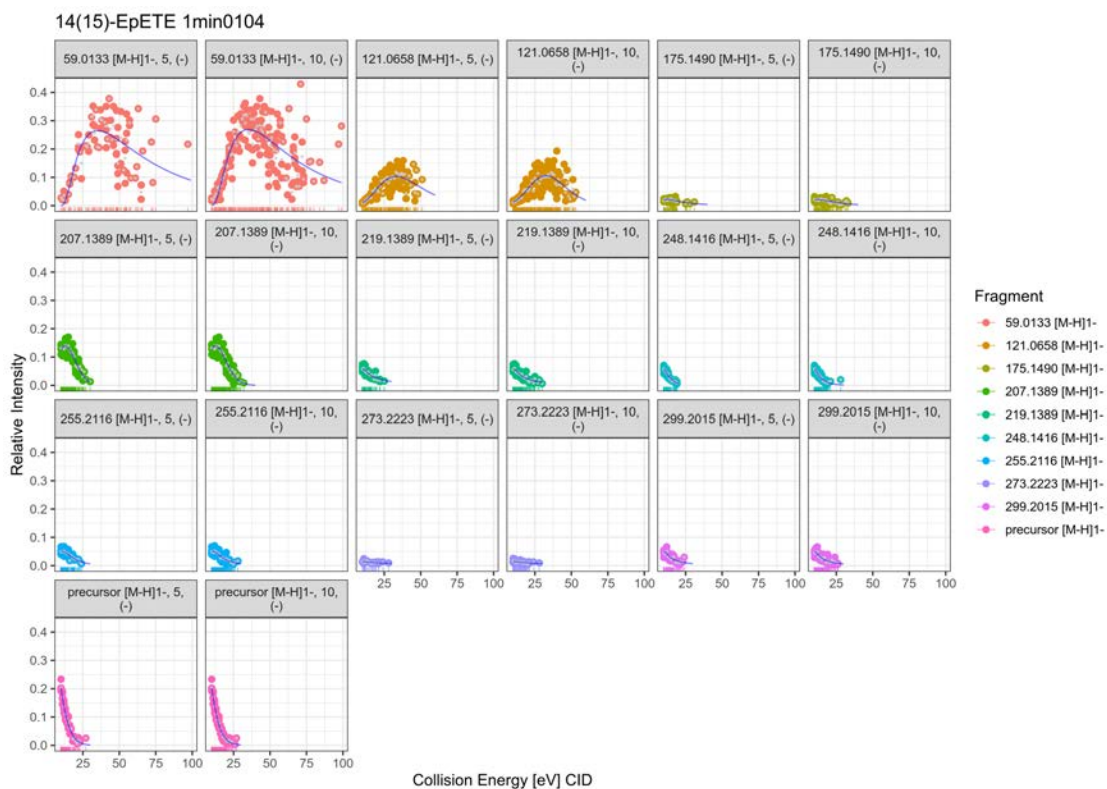

Figure 66. Nonlinear fit

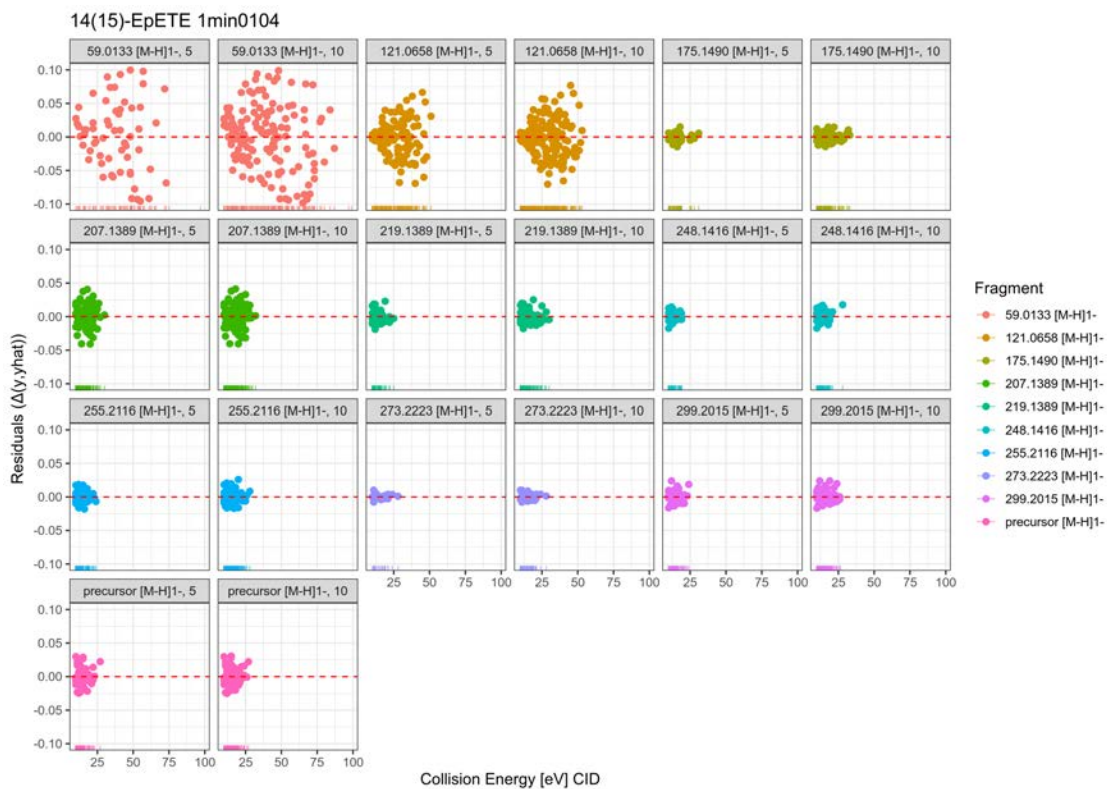

Figure 67. Residuals of nonlinear fit



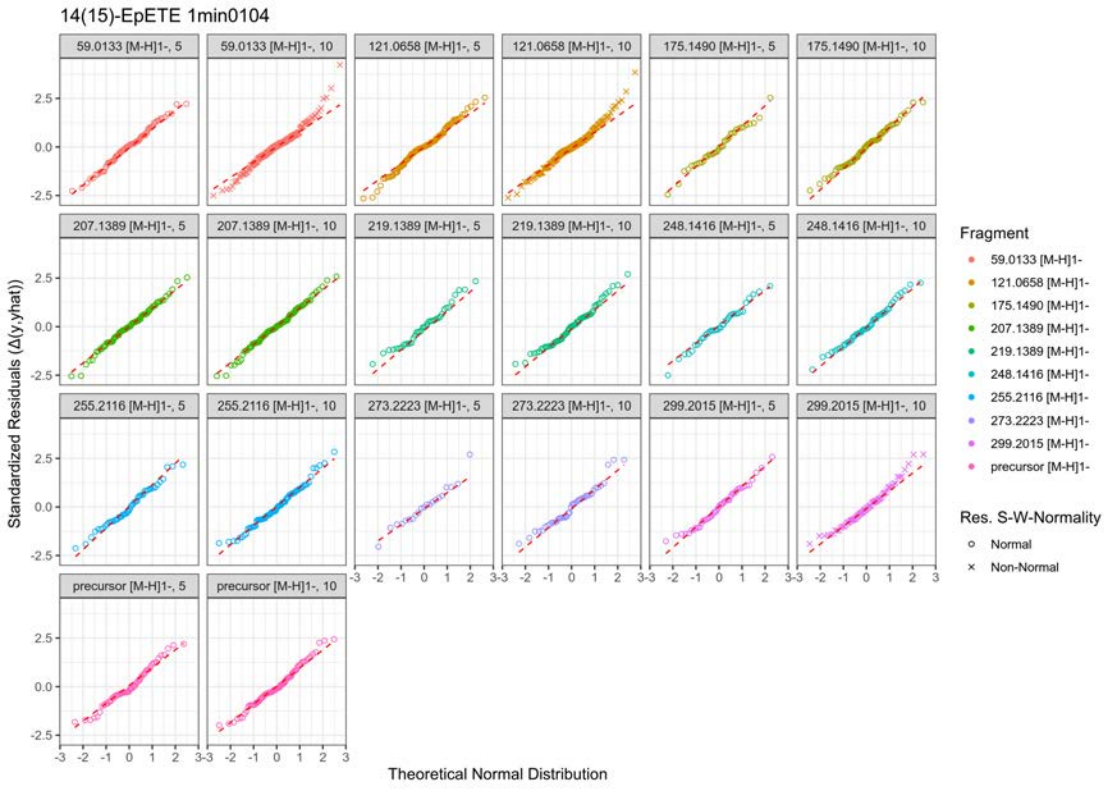

Figure 68. Quantile-quantile plot of residuals

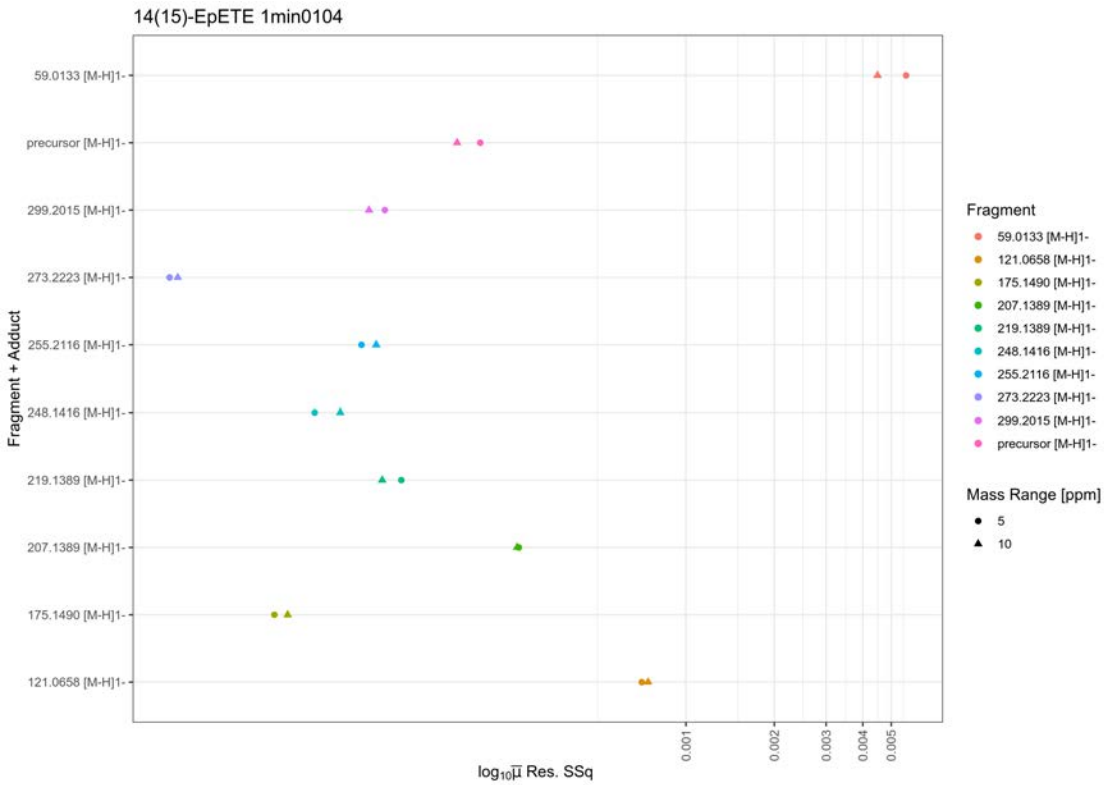

Figure 69. Normalized sum-of-squares of the residuals



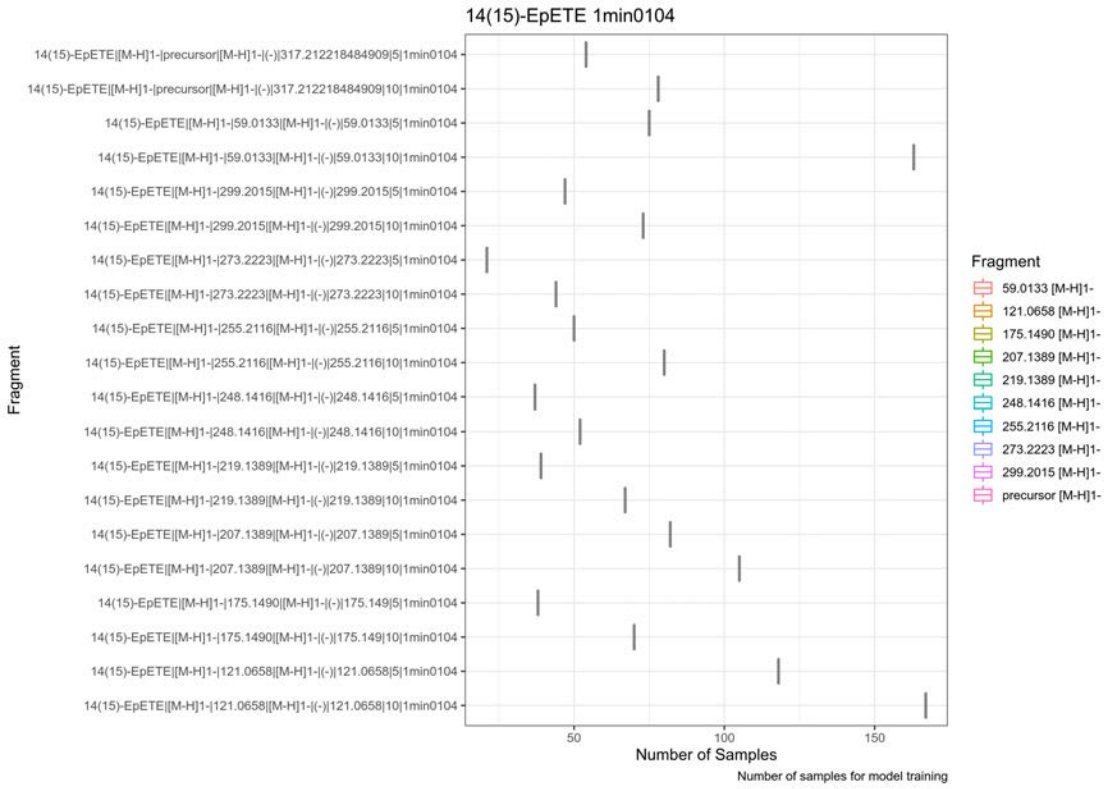

Figure 70. Number of samples used for training per combination Id

# 1.15. 14,15-DHET{d11} [M-H]1- 1min0224

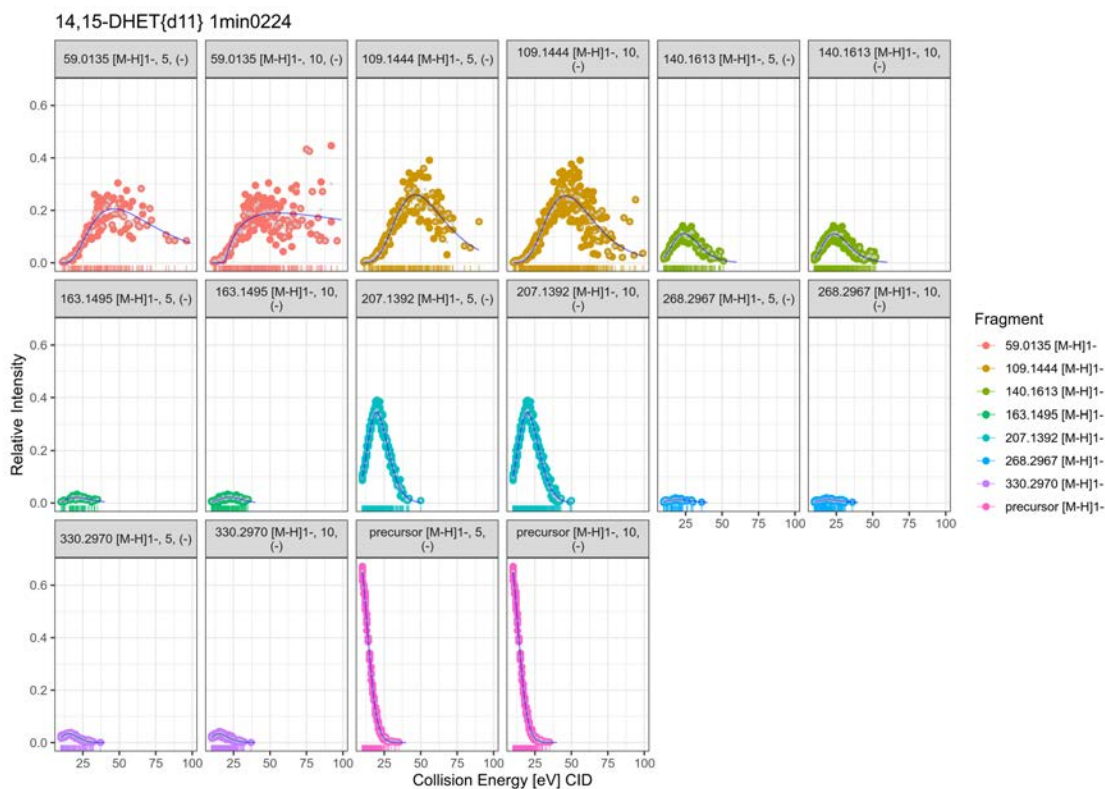

Figure 71. Nonlinear fit

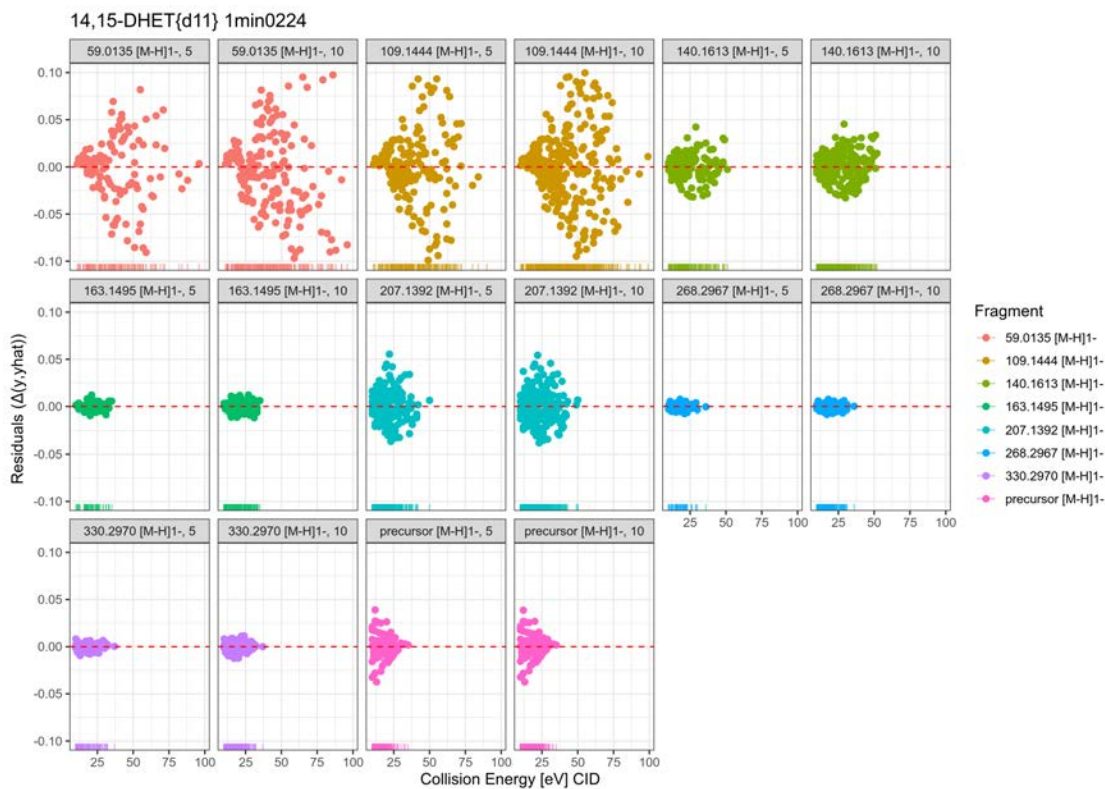

Figure 72. Residuals of nonlinear fit

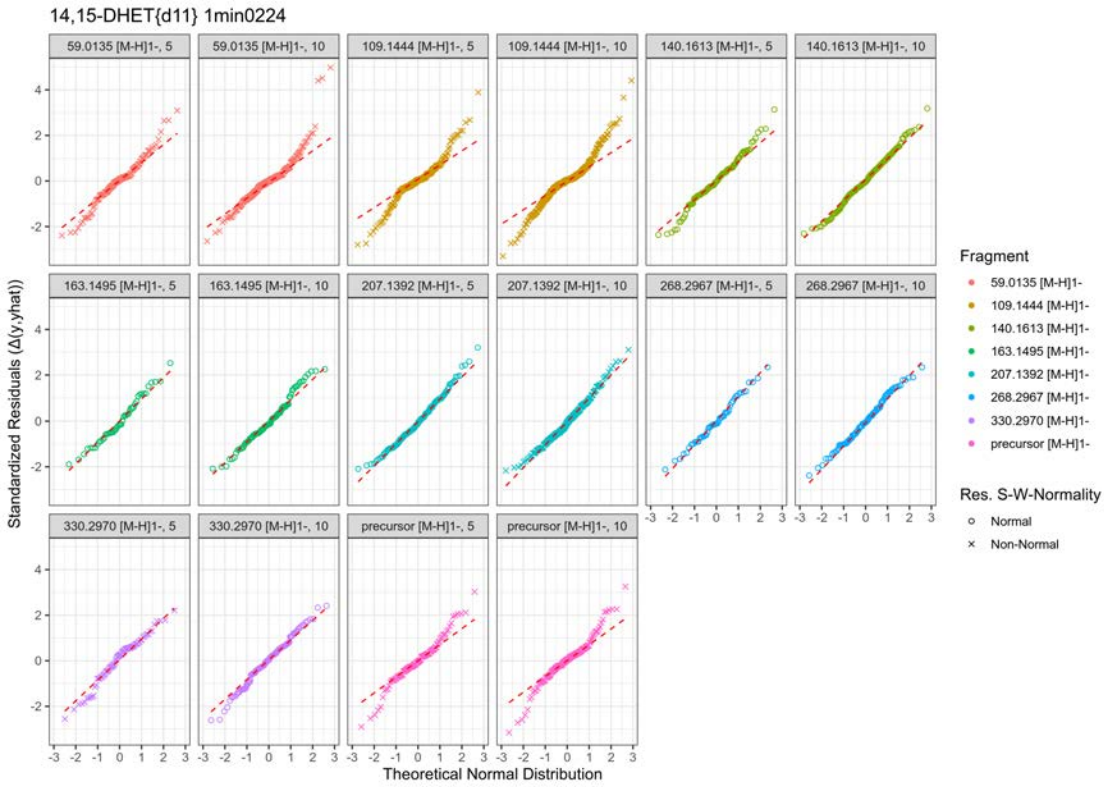

Figure 73. Quantile-quantile plot of residuals

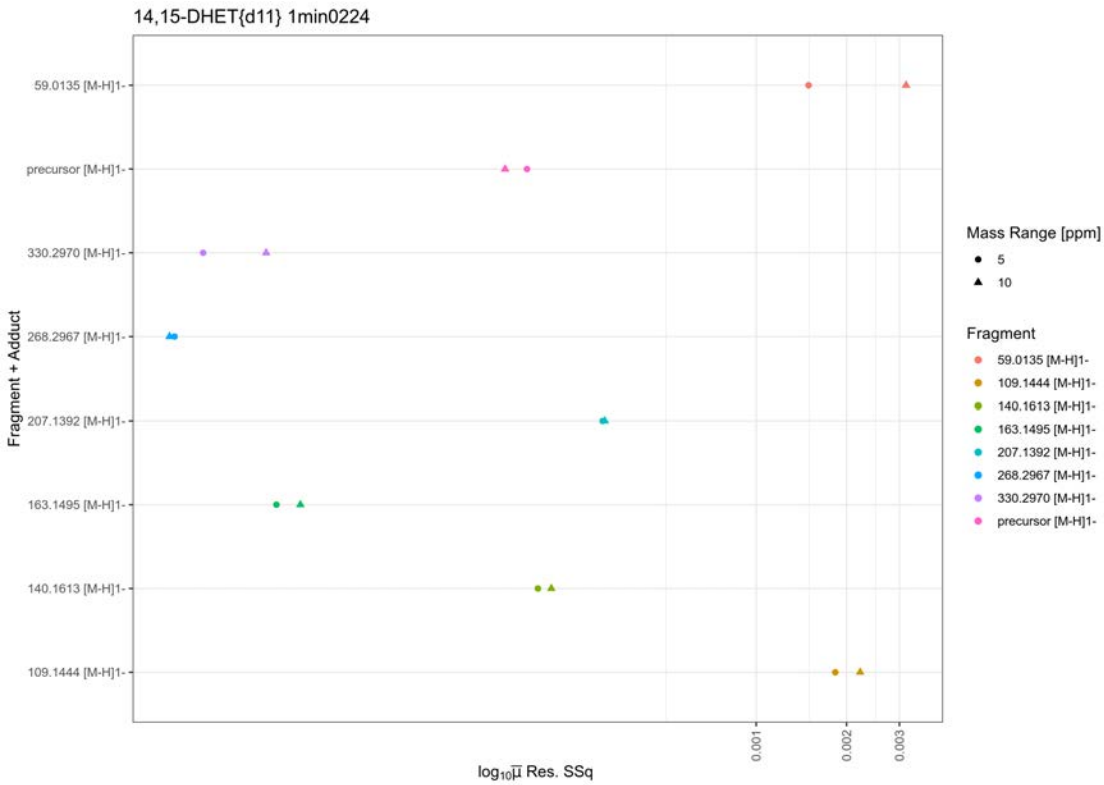

Figure 74. Normalized sum-of-squares of the residuals

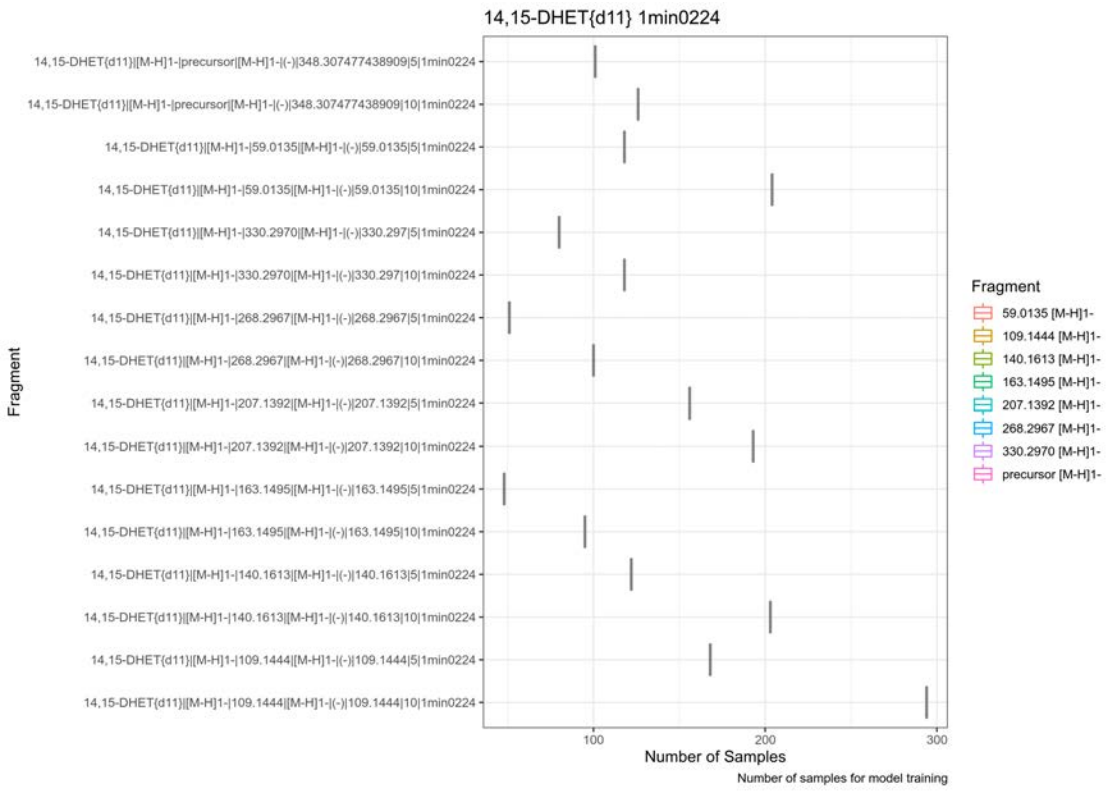

Figure 75. Number of samples used for training per combination Id

# 1.16. 15-HEPE [M-H]1- 1min0208

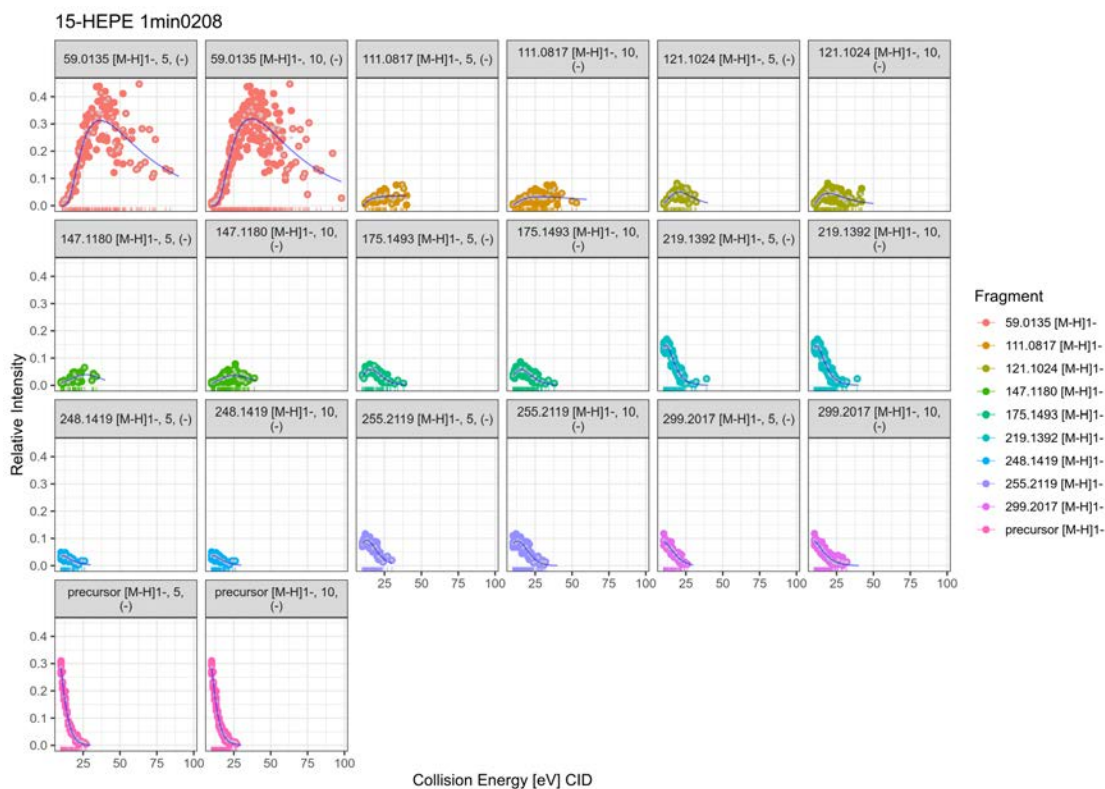

Figure 76. Nonlinear fit

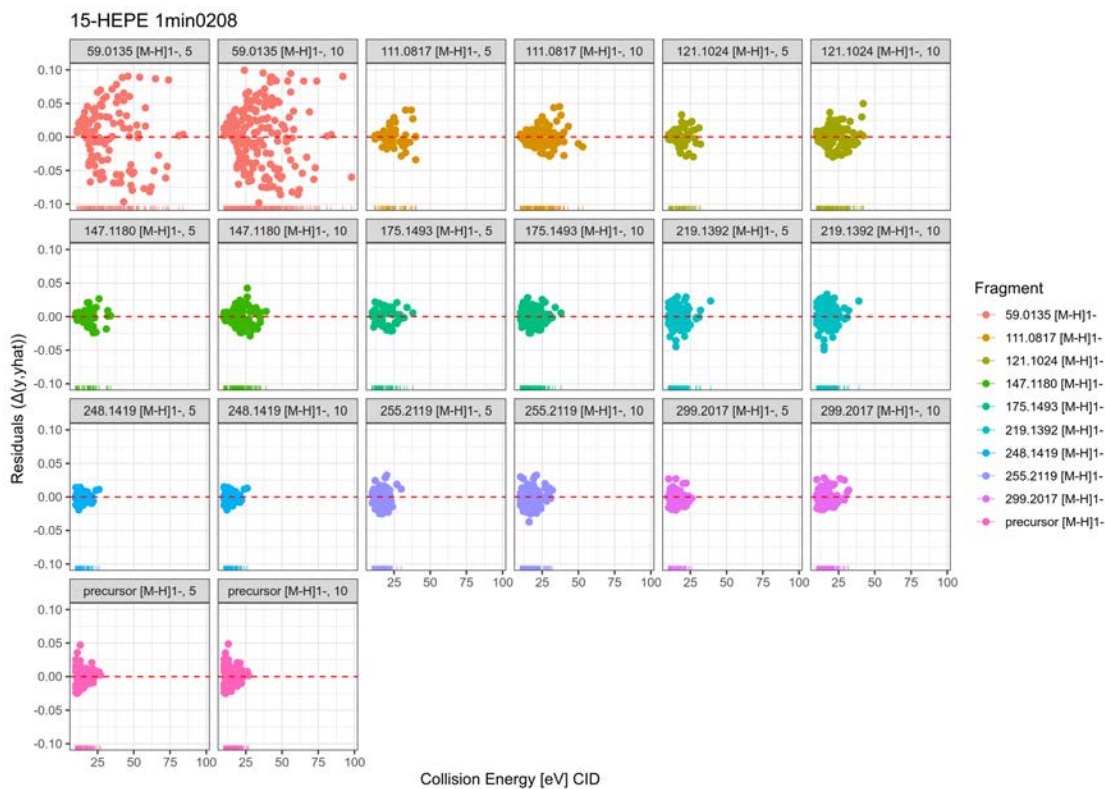

Figure 77. Residuals of nonlinear fit



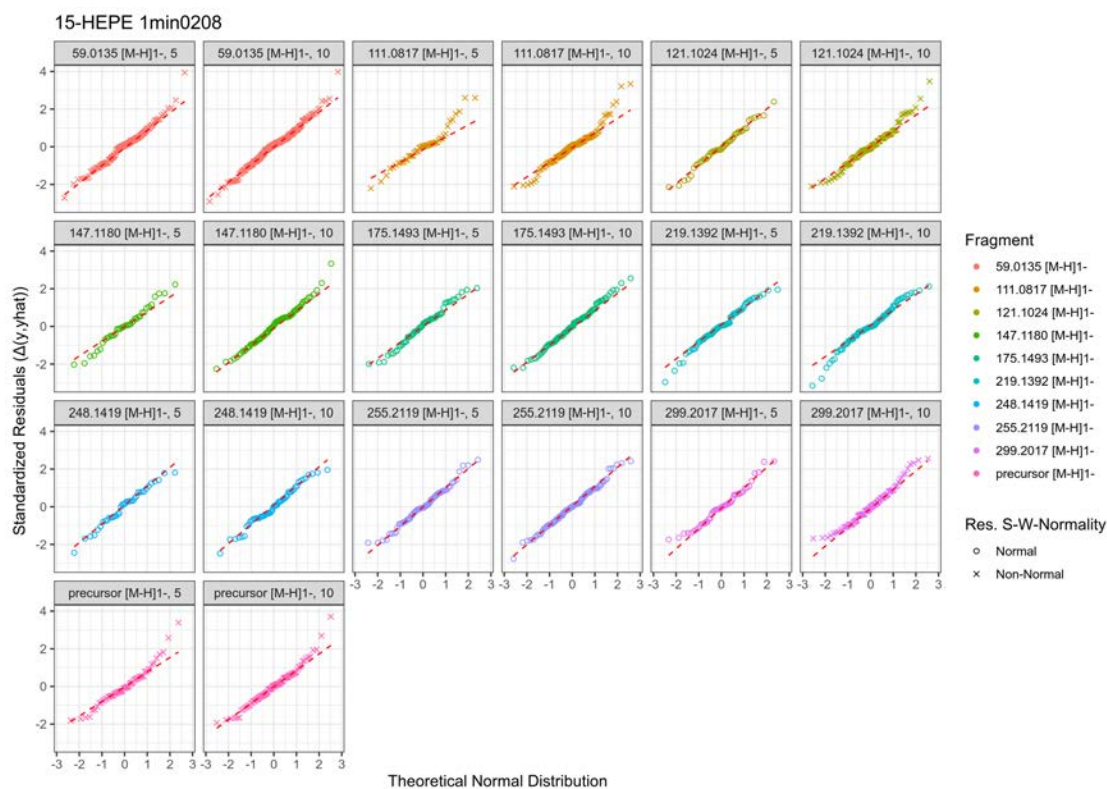

Figure 78. Quantile-quantile plot of residuals

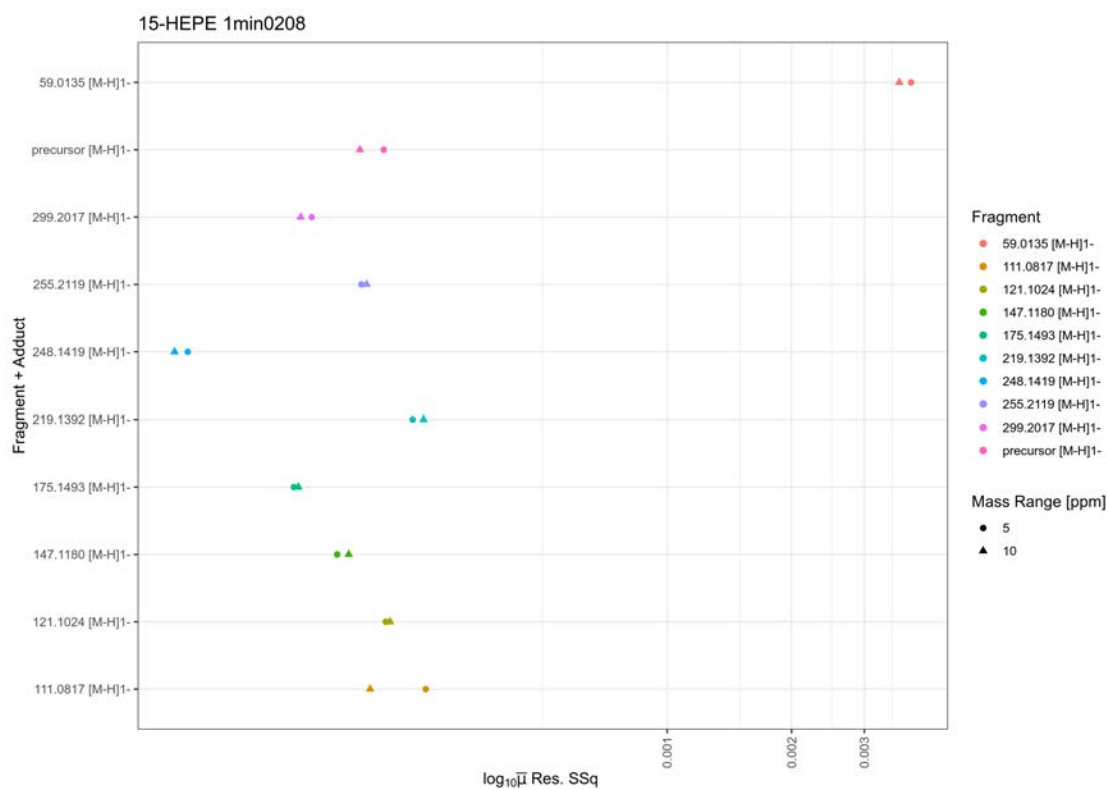

Figure 79. Normalized sum-of-squares of the residuals

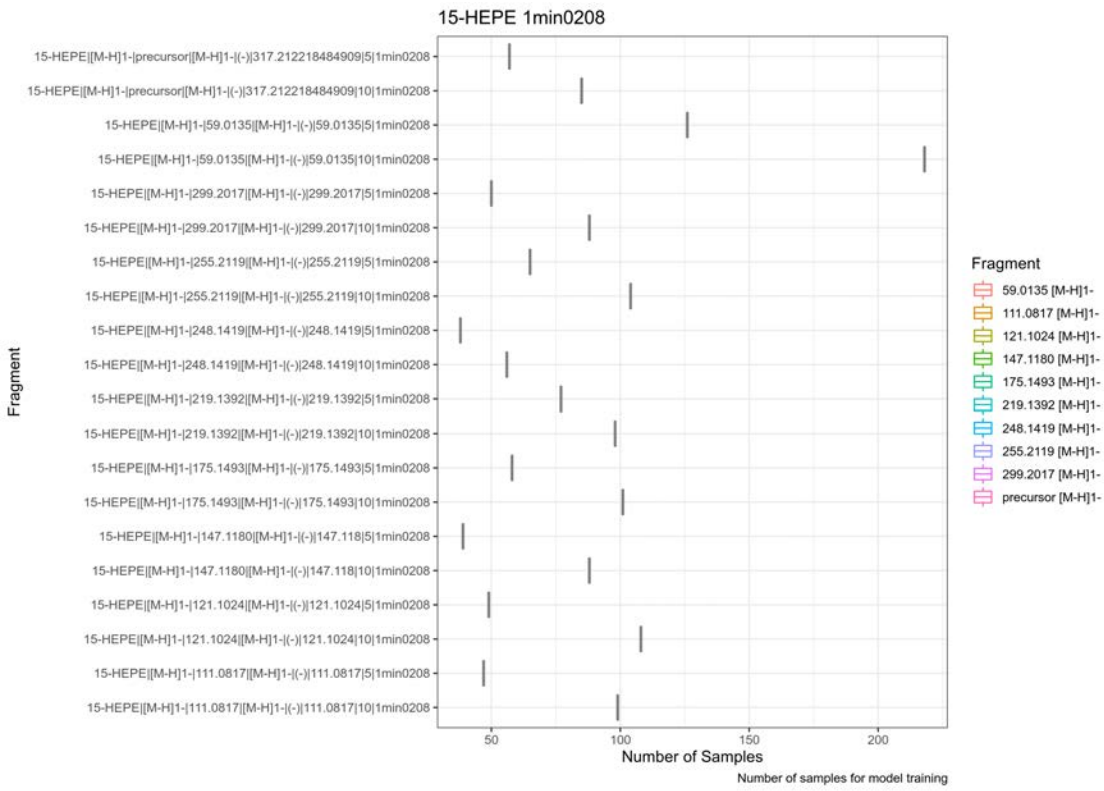

Figure 80. Number of samples used for training per combination Id

# 1.17. 15-HETE{d8} [M-H]1- 1min0108

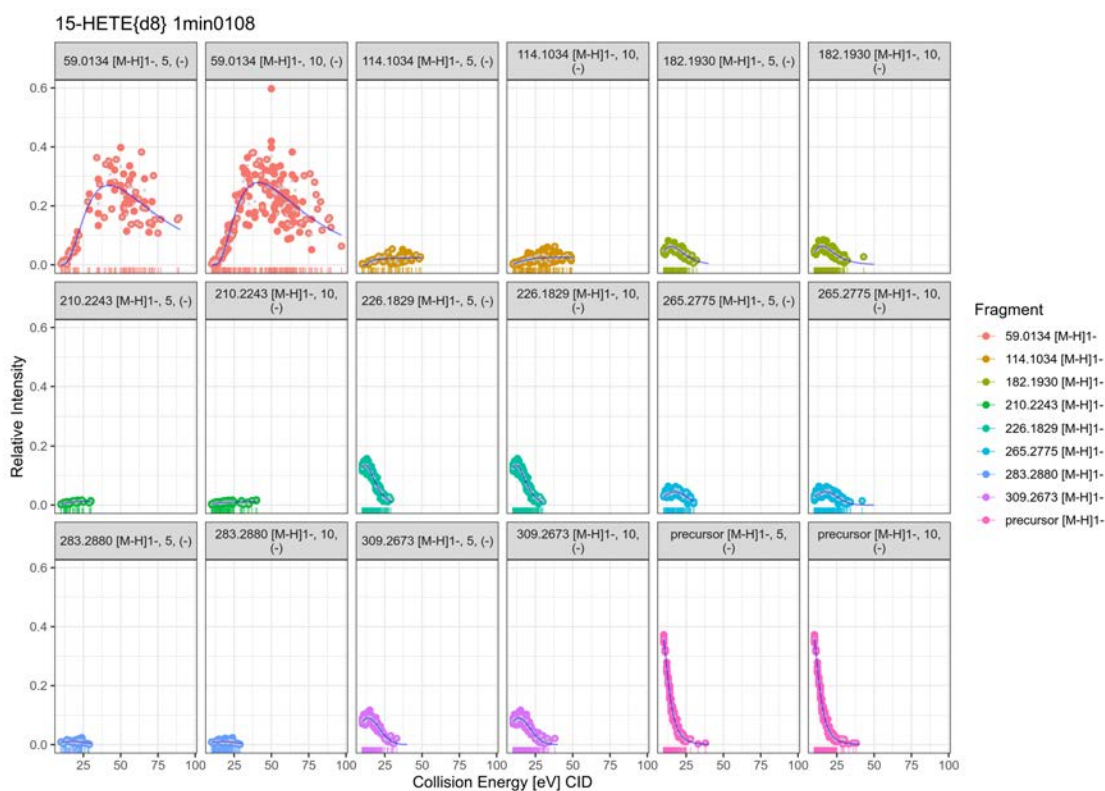

Figure 81. Nonlinear fit

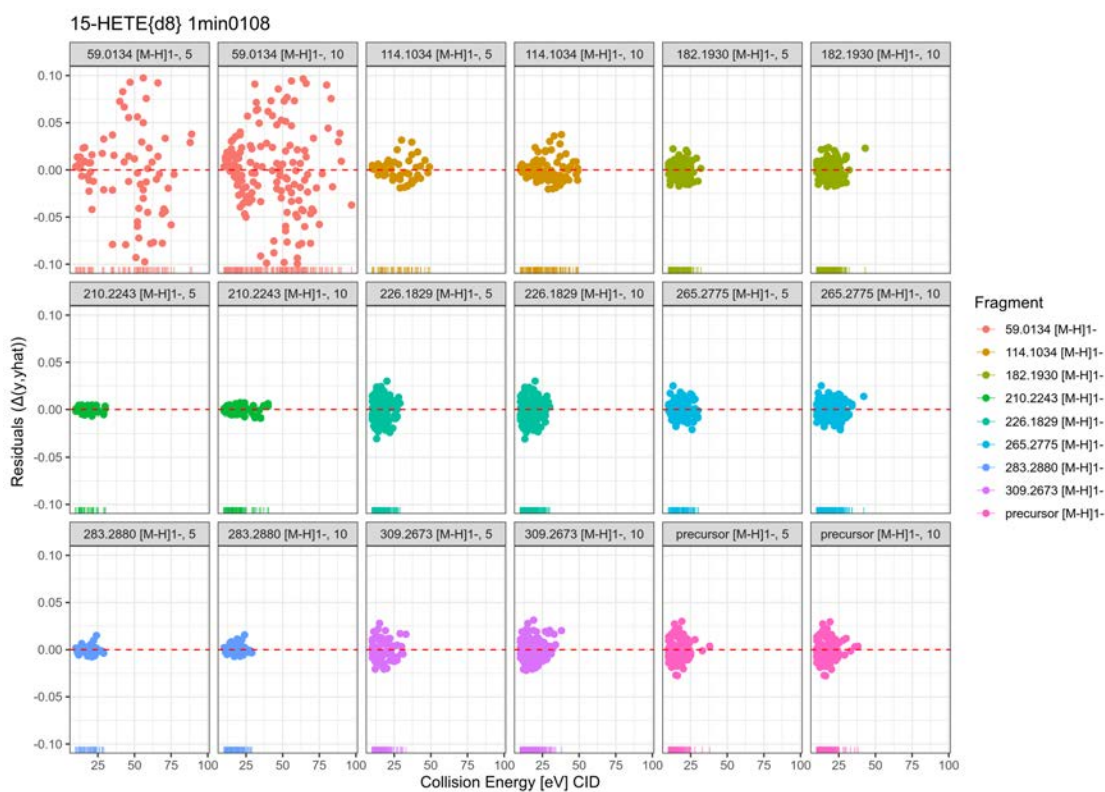

Figure 82. Residuals of nonlinear fit

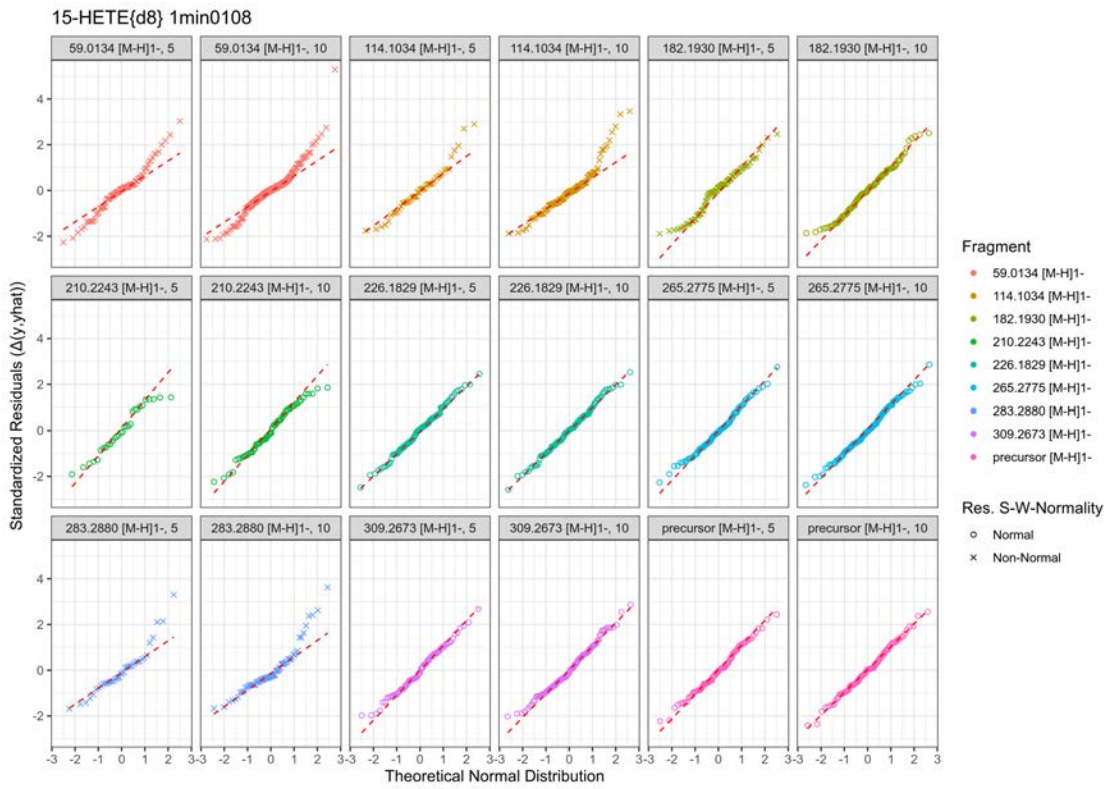

Figure 83. Quantile-quantile plot of residuals

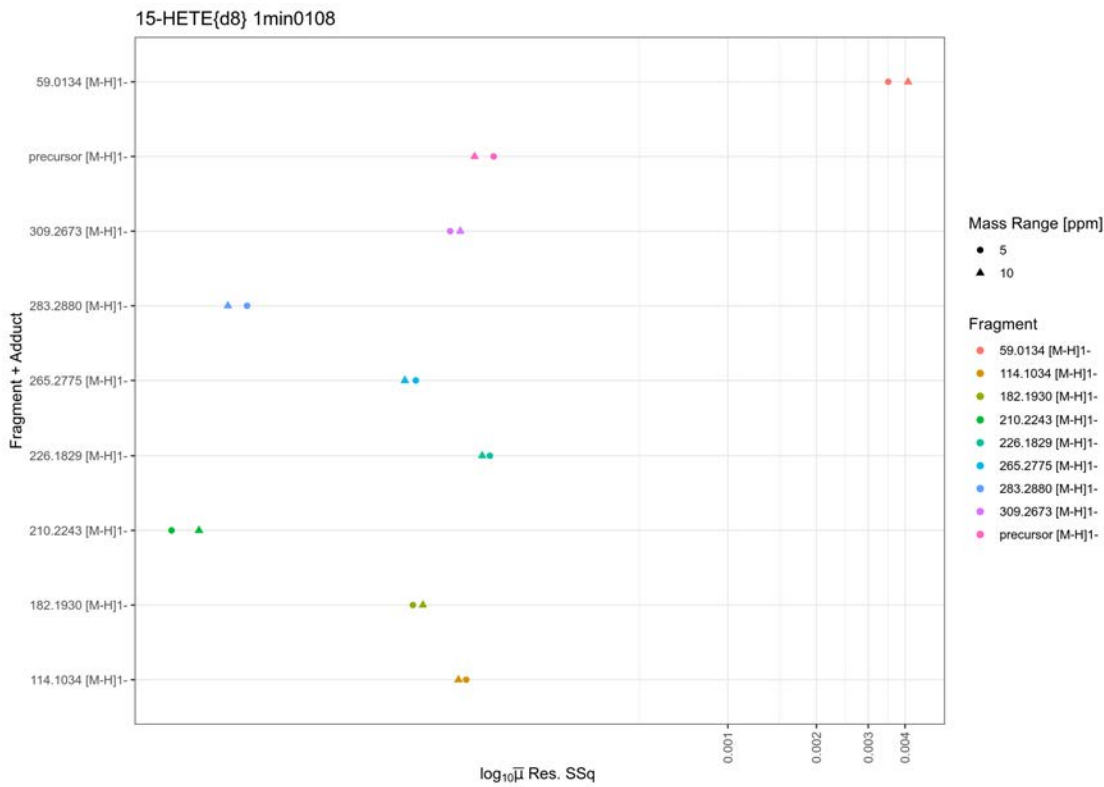

Figure 84. Normalized sum-of-squares of the residuals

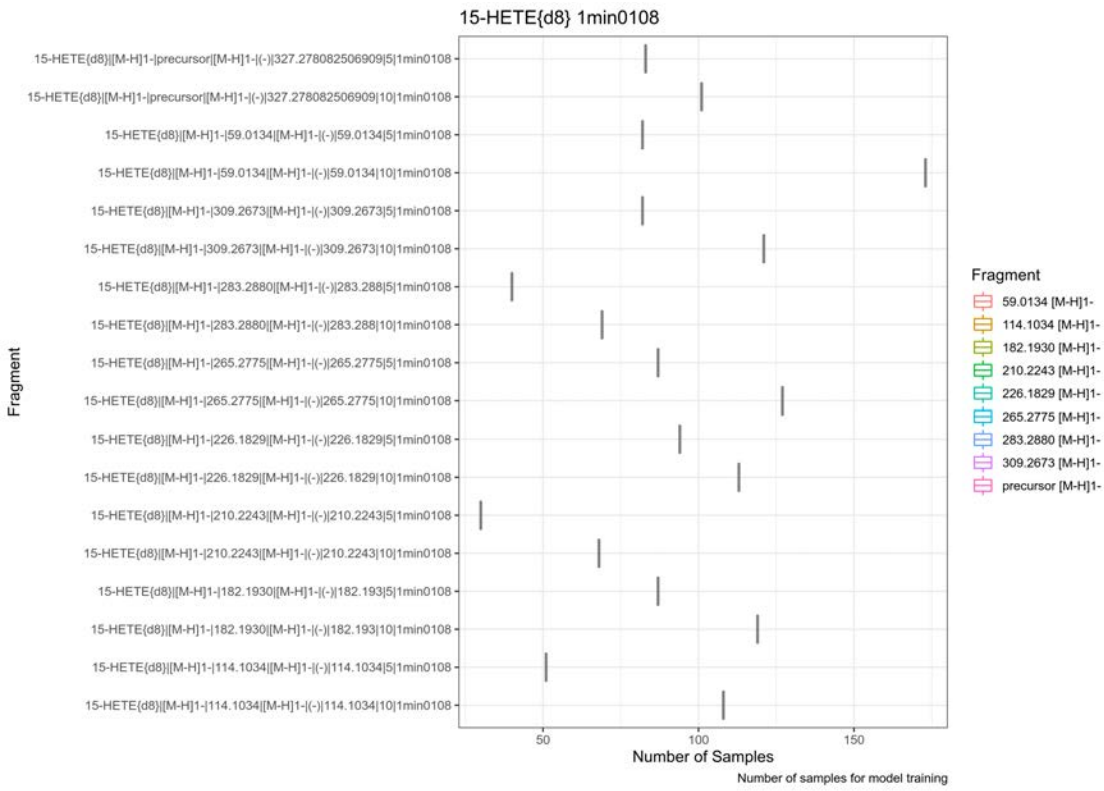

Figure 85. Number of samples used for training per combination Id



# 1.18. 15d-PGJ2{d4} [M-H]1- 1min0219

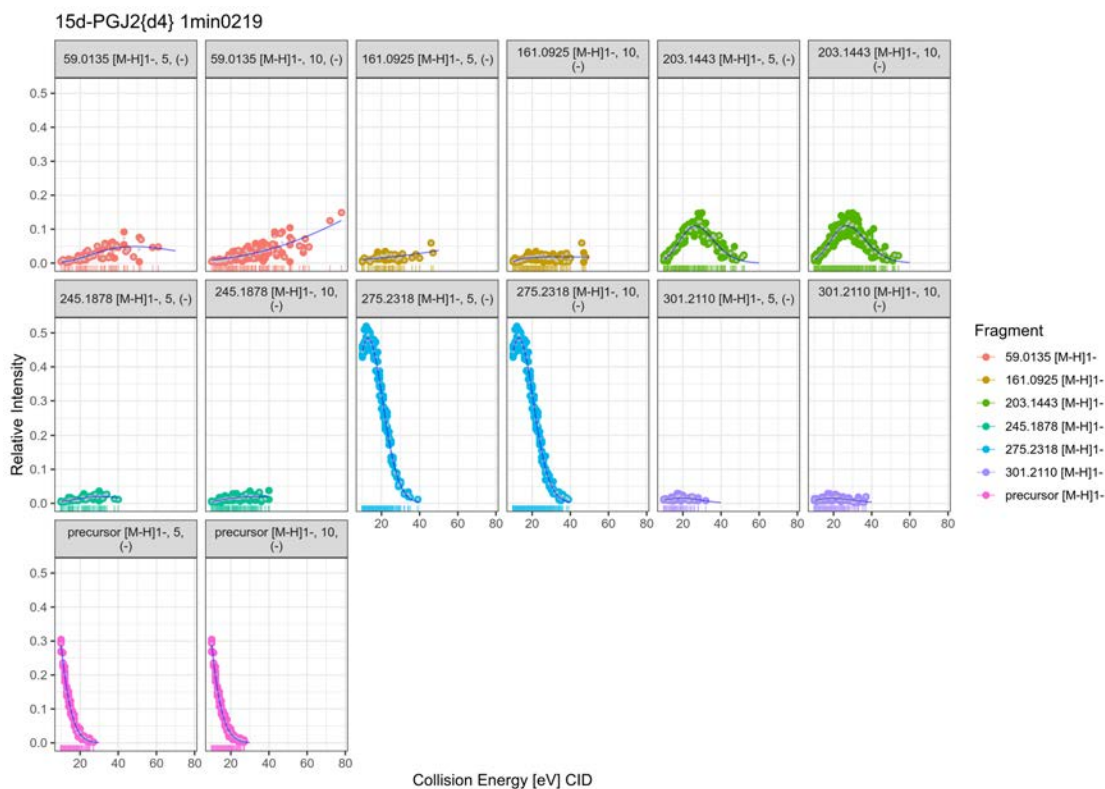

Figure 86. Nonlinear fit

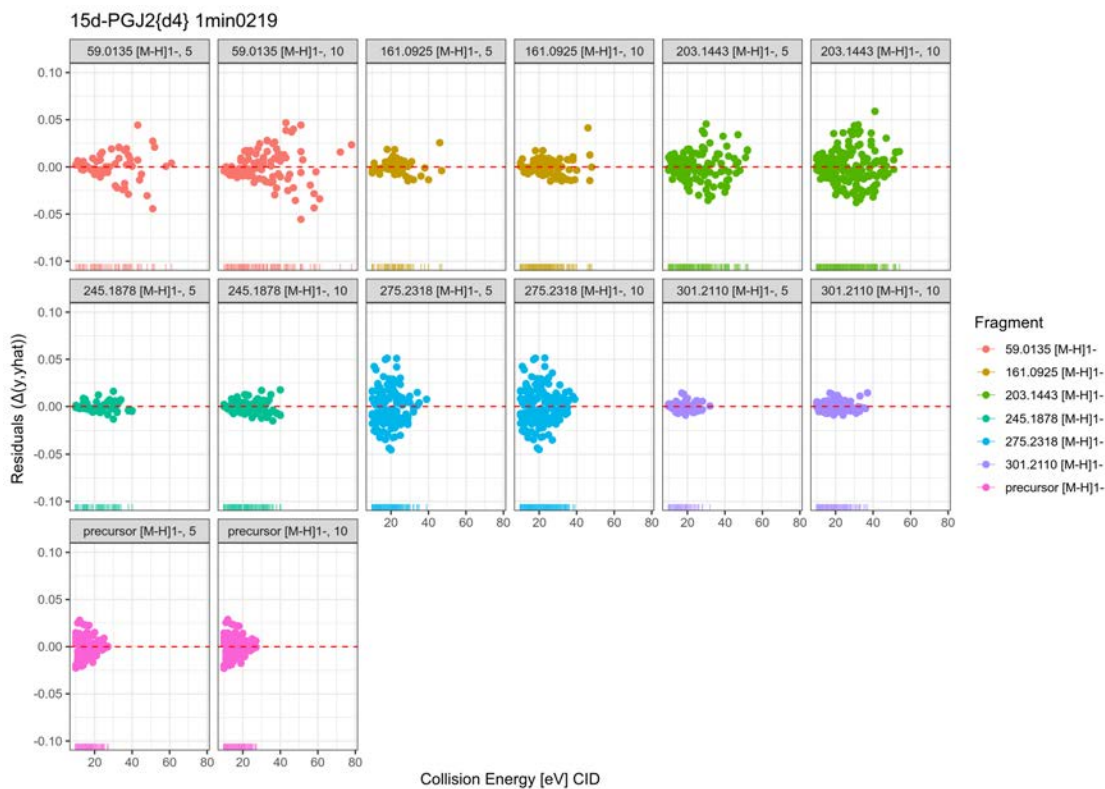

Figure 87. Residuals of nonlinear fit

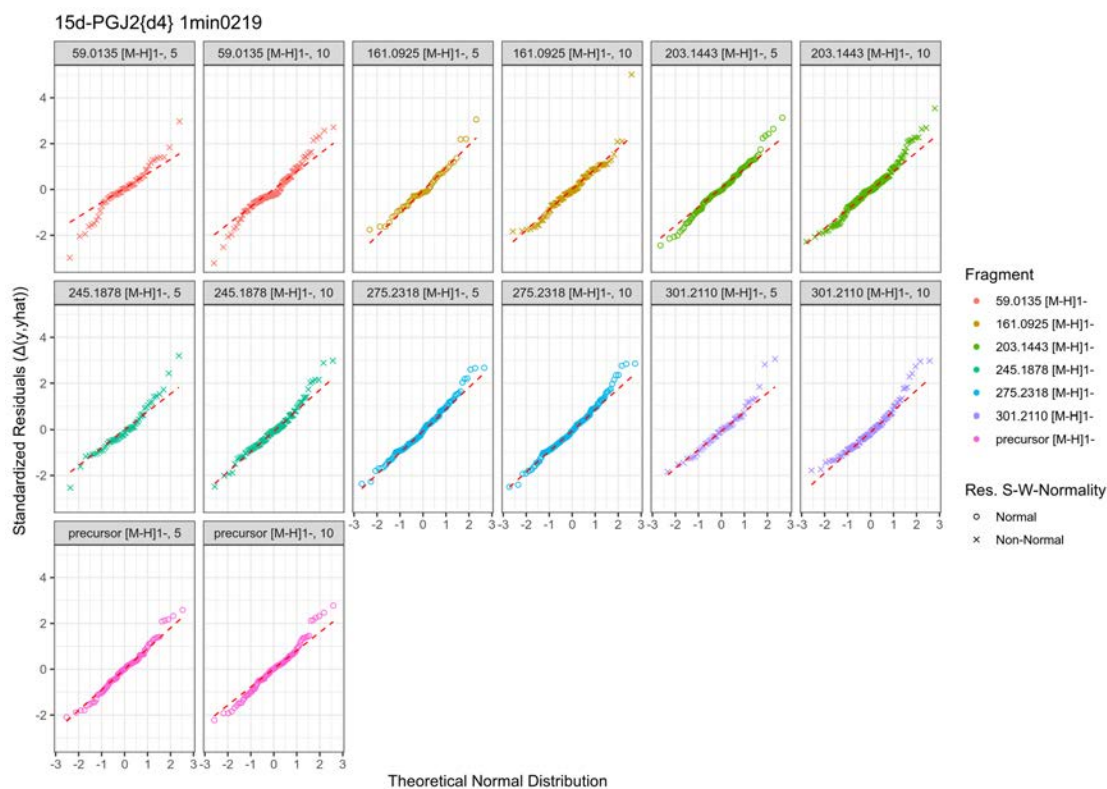

Figure 88. Quantile-quantile plot of residuals

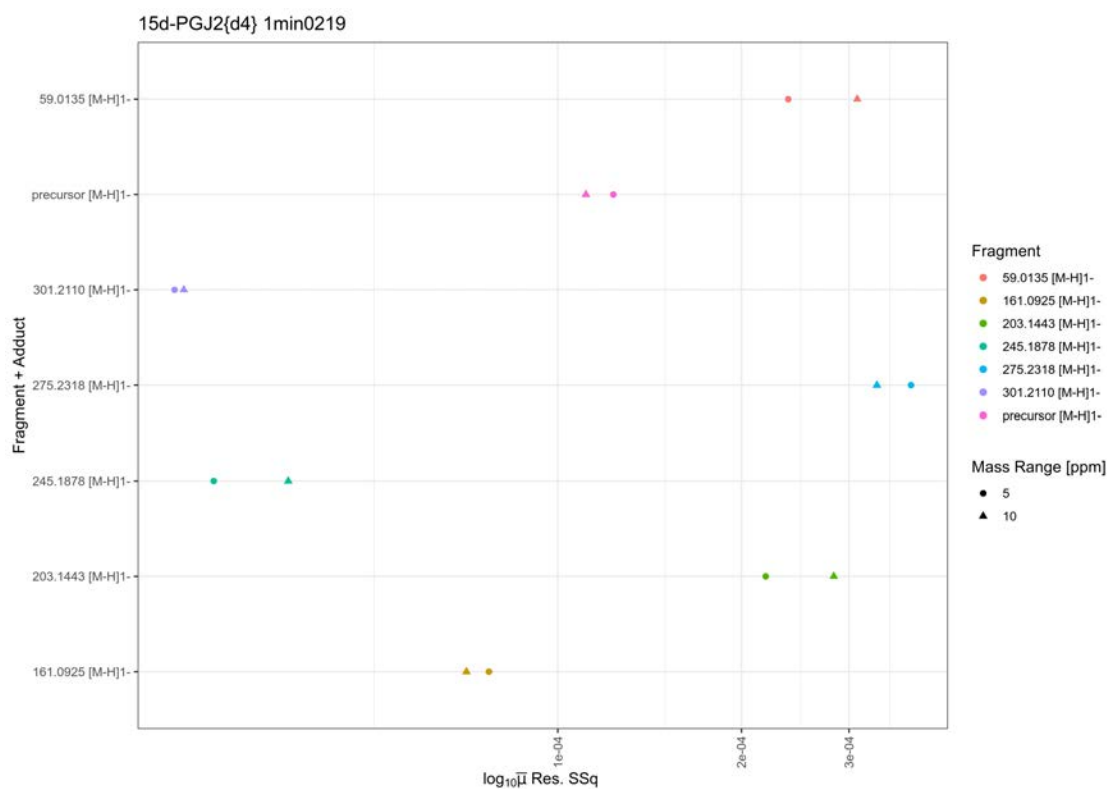

Figure 89. Normalized sum-of-squares of the residuals

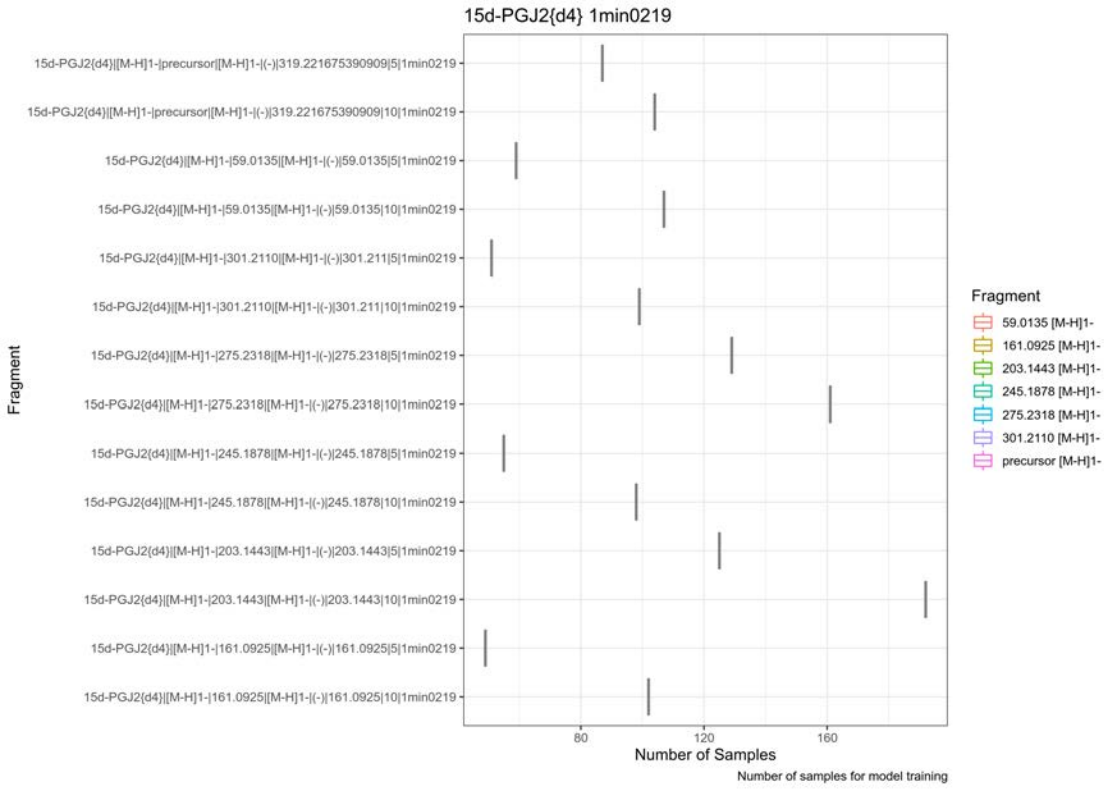

Figure 90. Number of samples used for training per combination Id

# 1.19. 16-HDoHE [M-H]1- 1min0112

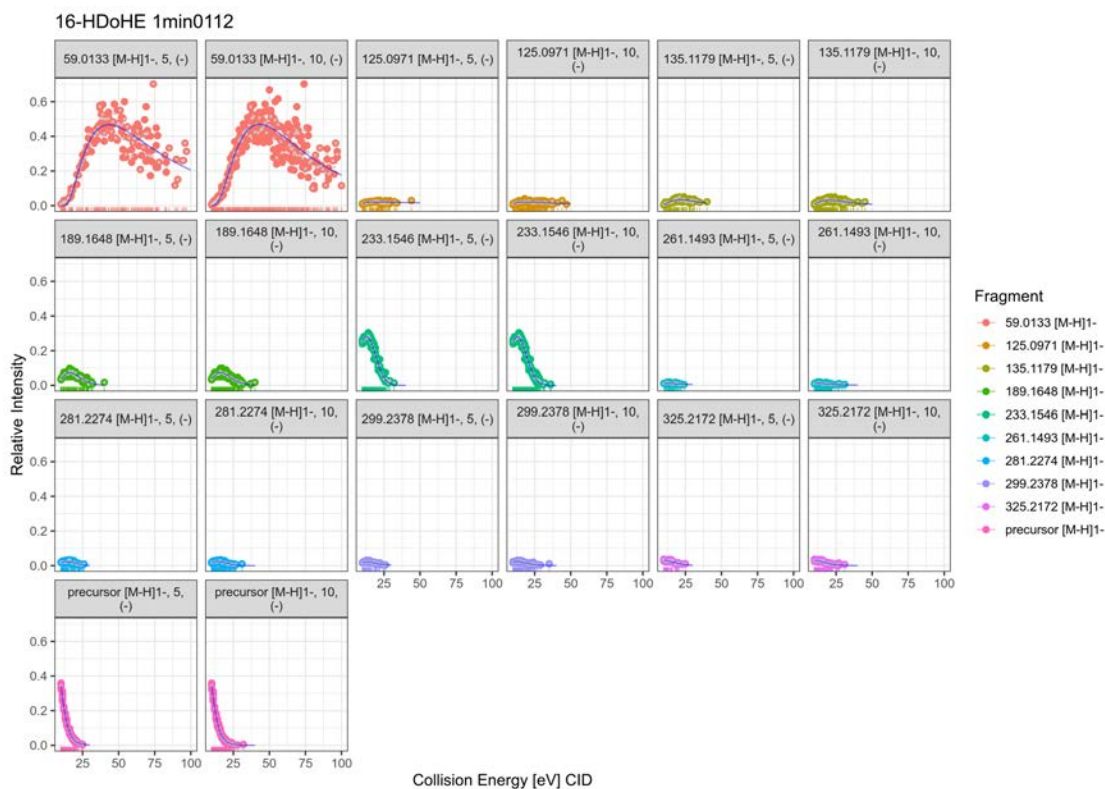

Figure 91. Nonlinear fit

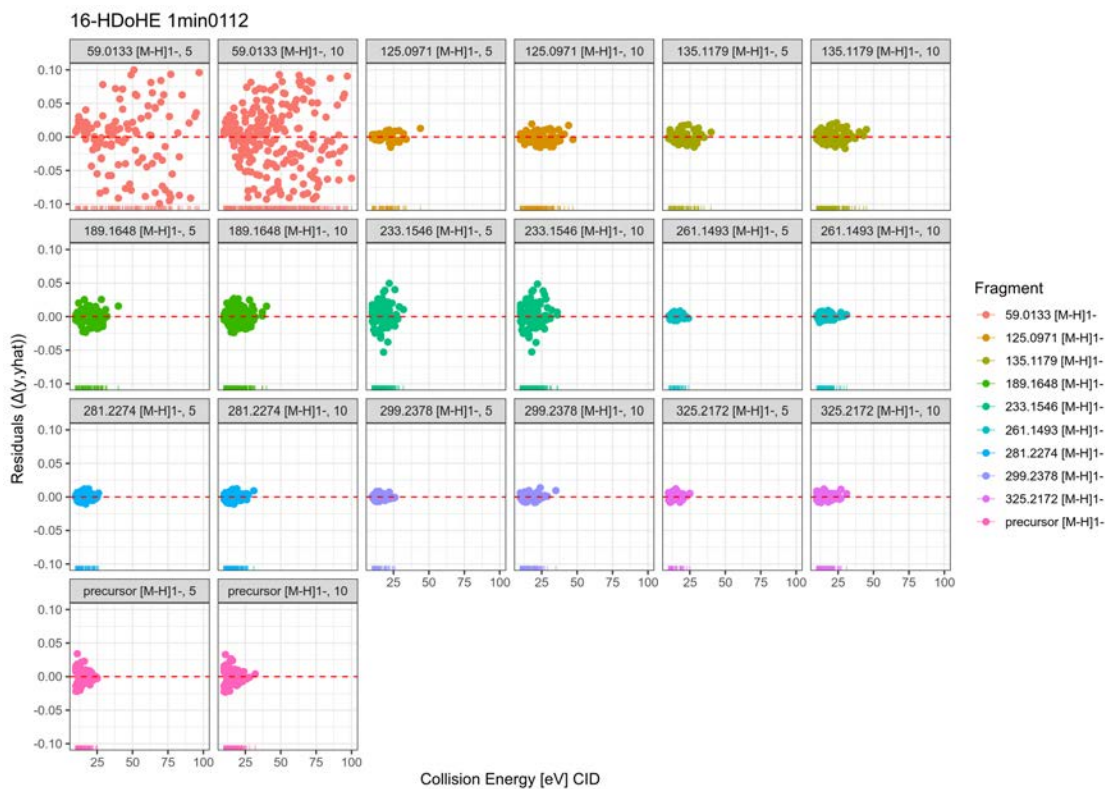

Figure 92. Residuals of nonlinear fit

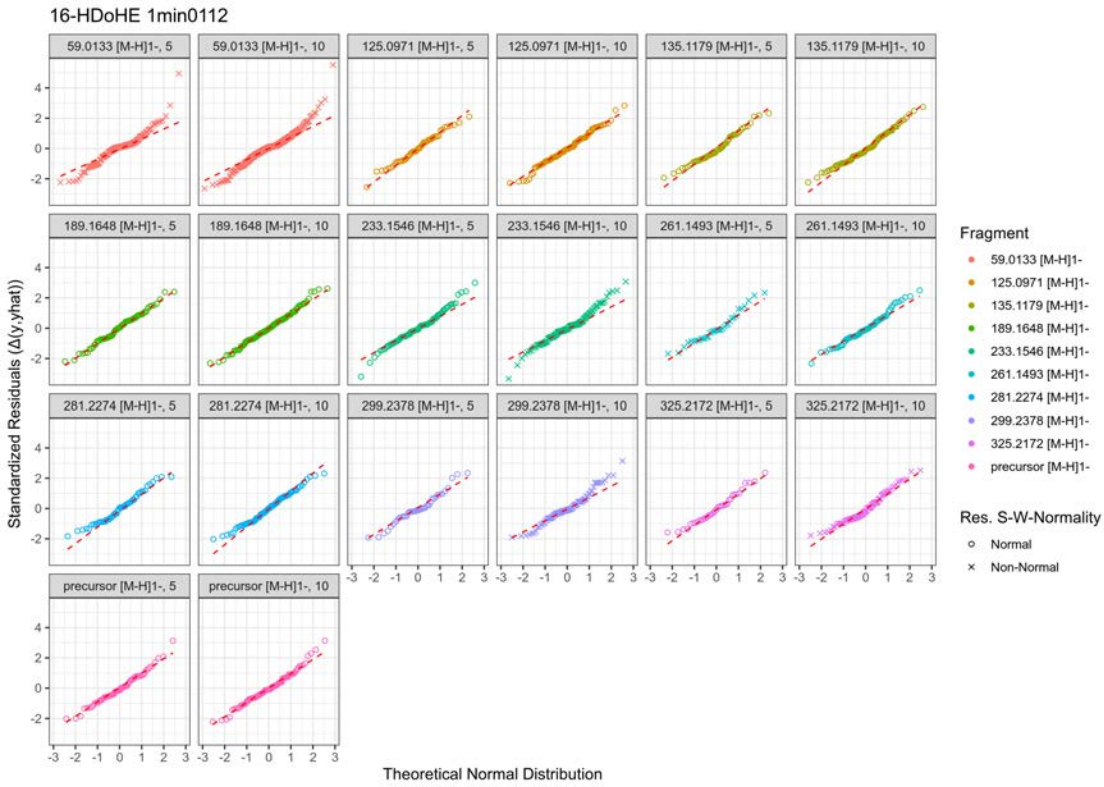

Figure 93. Quantile-quantile plot of residuals

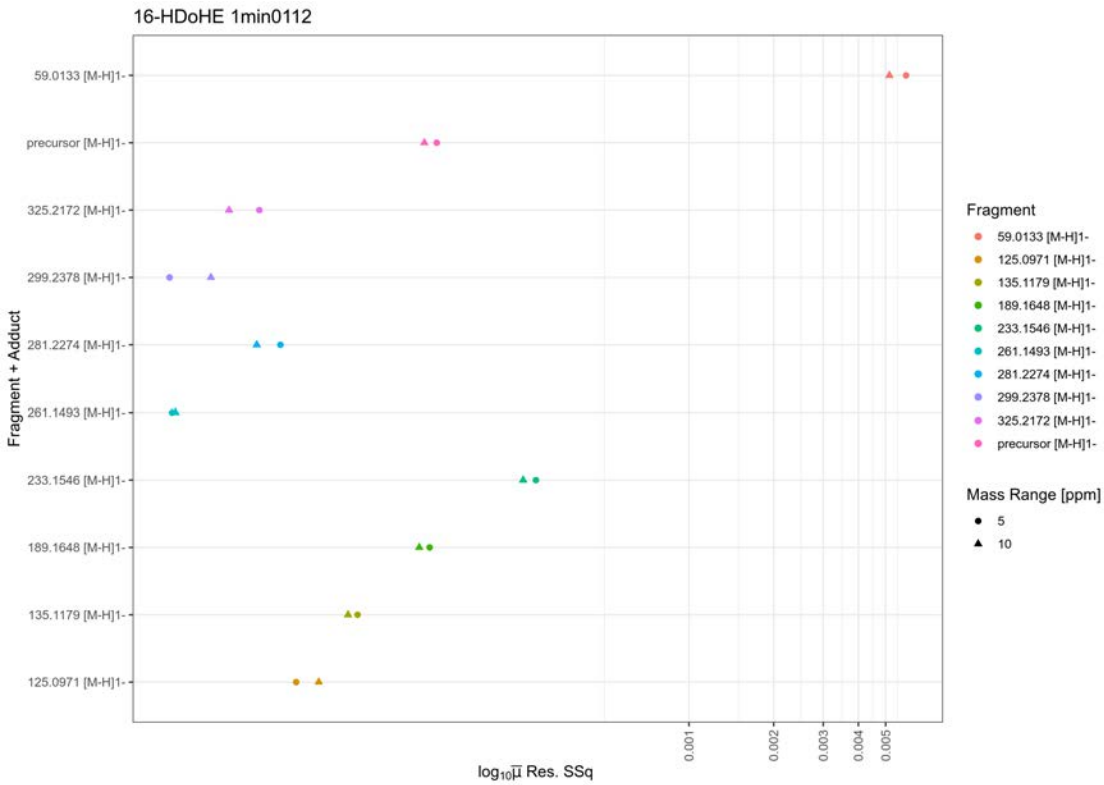

Figure 94. Normalized sum-of-squares of the residuals



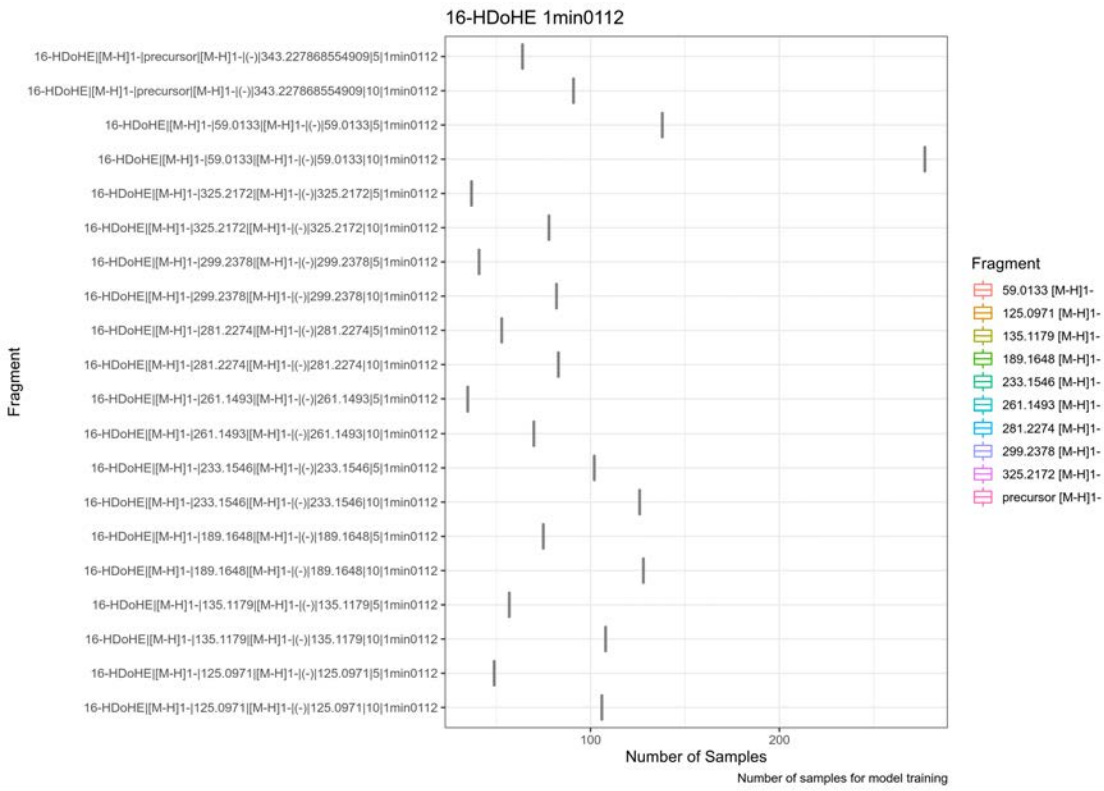

Figure 95. Number of samples used for training per combination Id

# 1.20. 18-HEPE [M-H]1- 1min0199

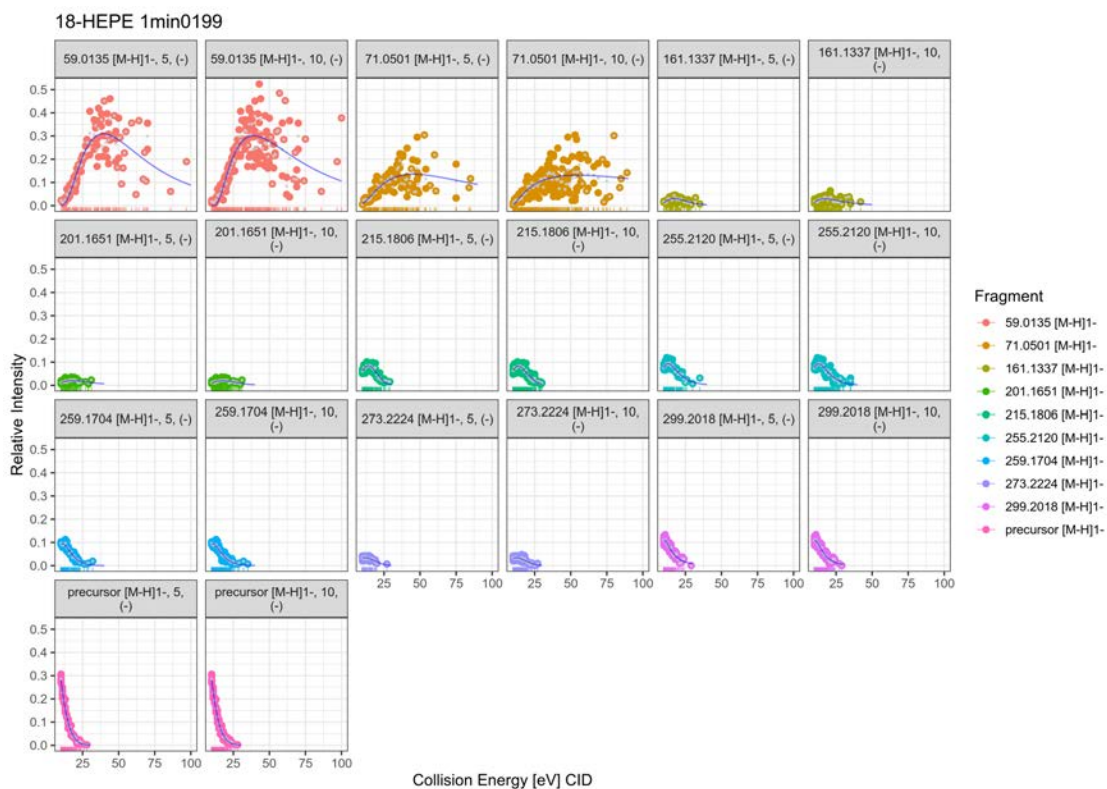

Figure 96. Nonlinear fit

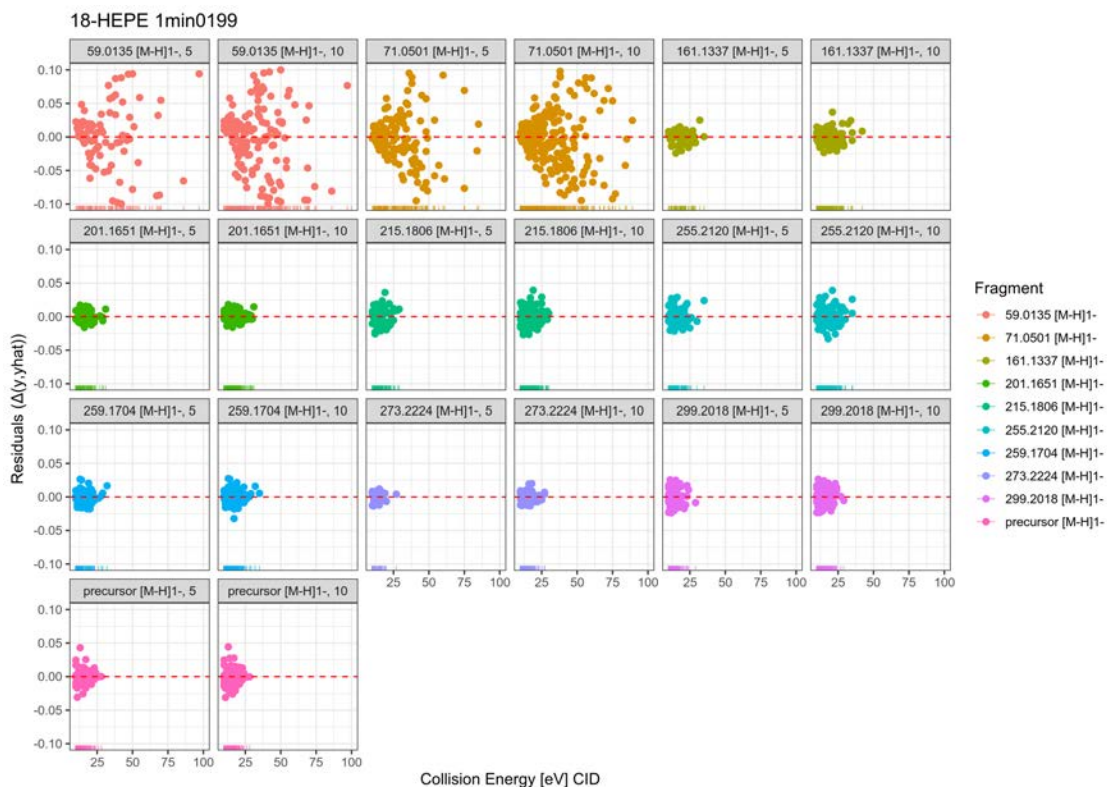

Figure 97. Residuals of nonlinear fit

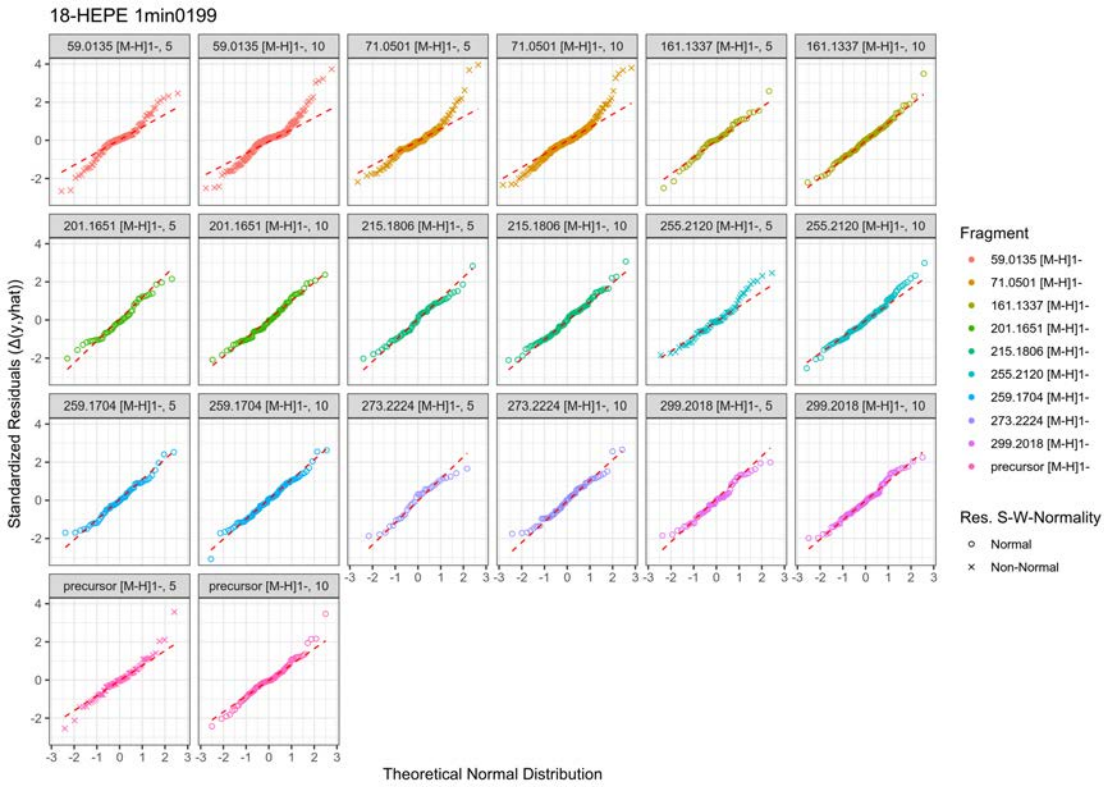

Figure 98. Quantile-quantile plot of residuals

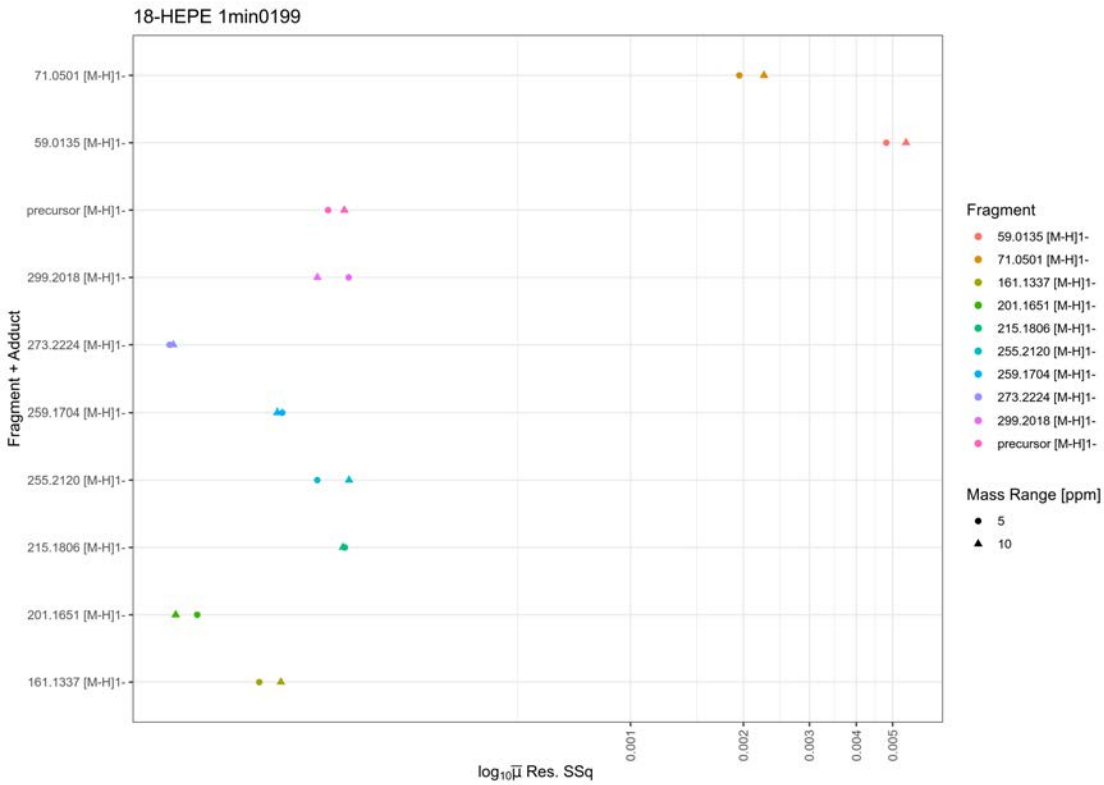

Figure 99. Normalized sum-of-squares of the residuals

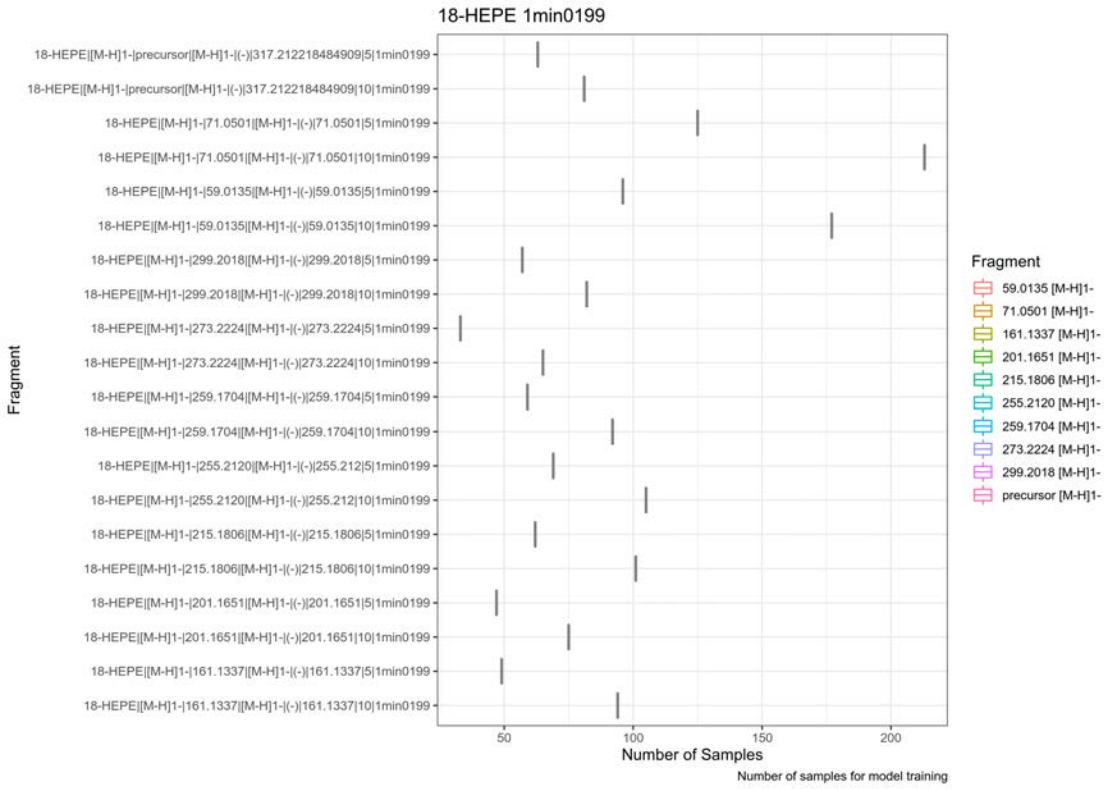

Figure 100. Number of samples used for training per combination Id

# 1.21. 5(6)-EET{d11} [M-H]1- 1min0227

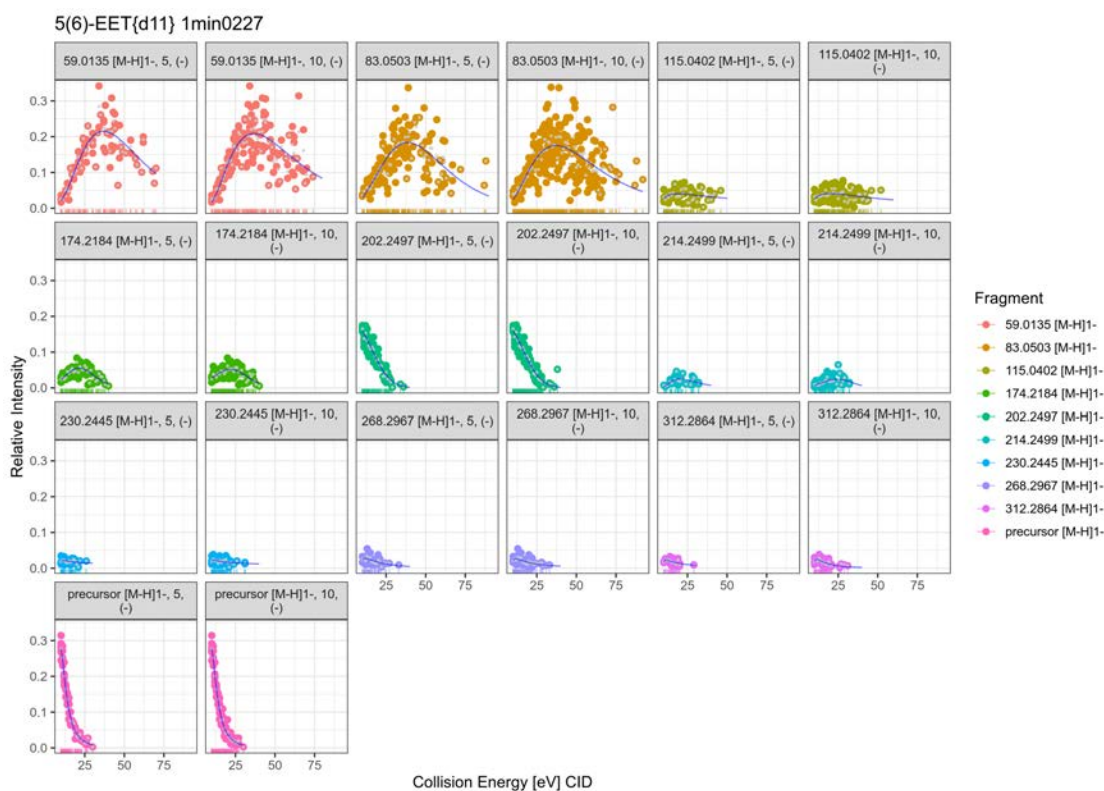

Figure 101. Nonlinear fit

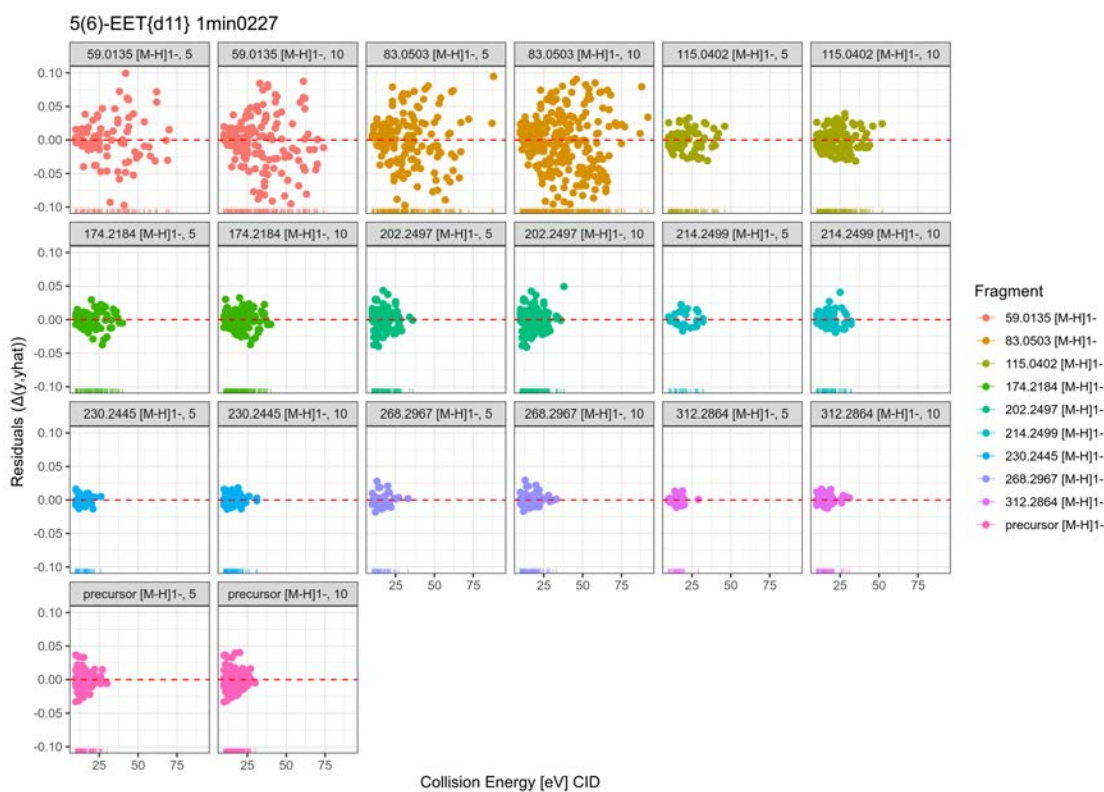

Figure 102. Residuals of nonlinear fit



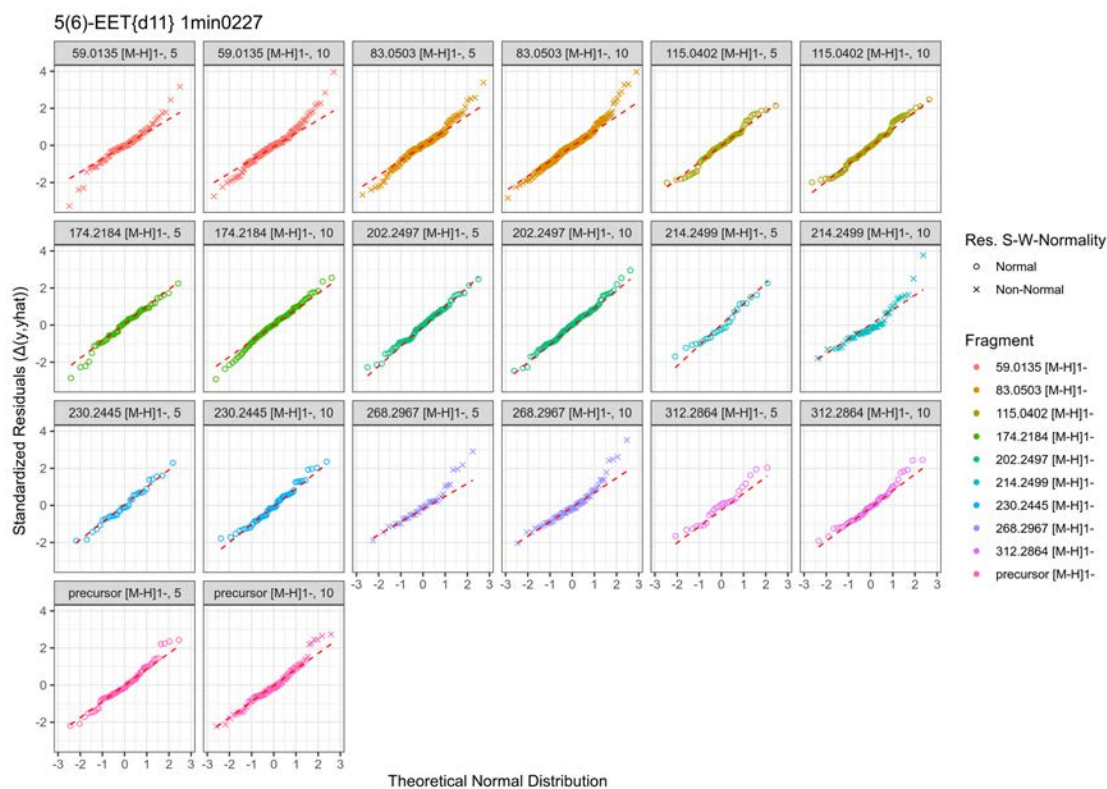

Figure 103. Quantile-quantile plot of residuals

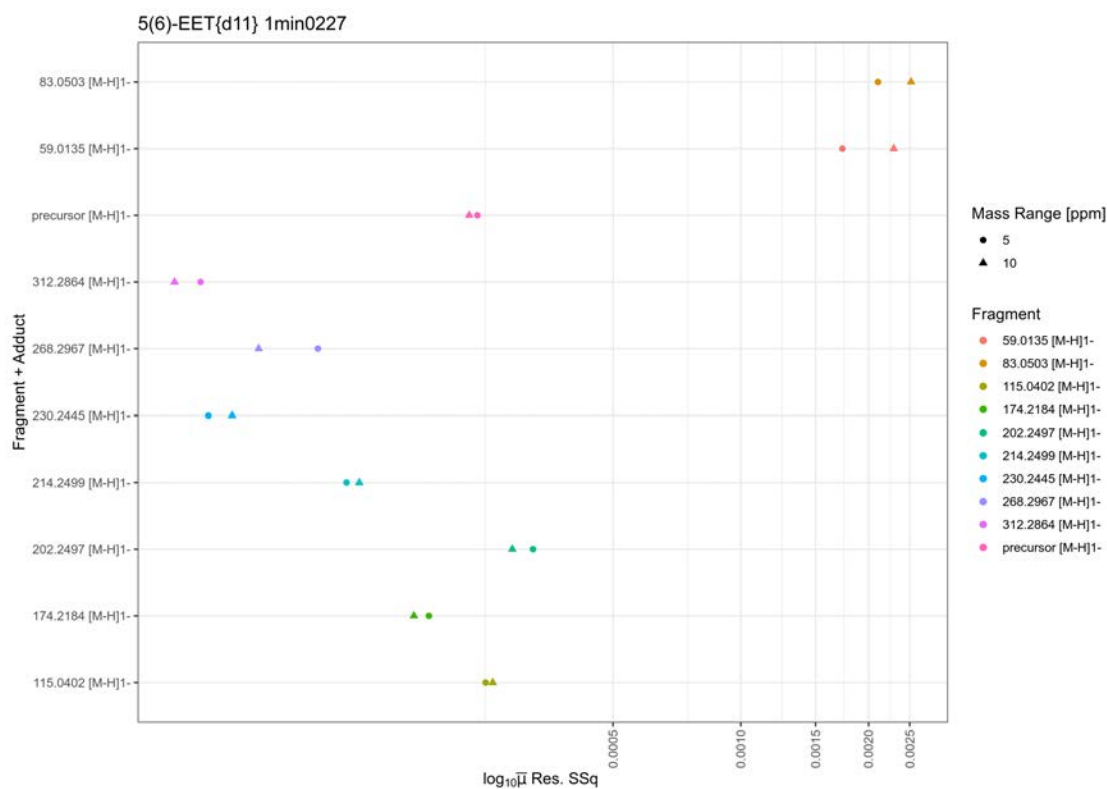

Figure 104. Normalized sum-of-squares of the residuals

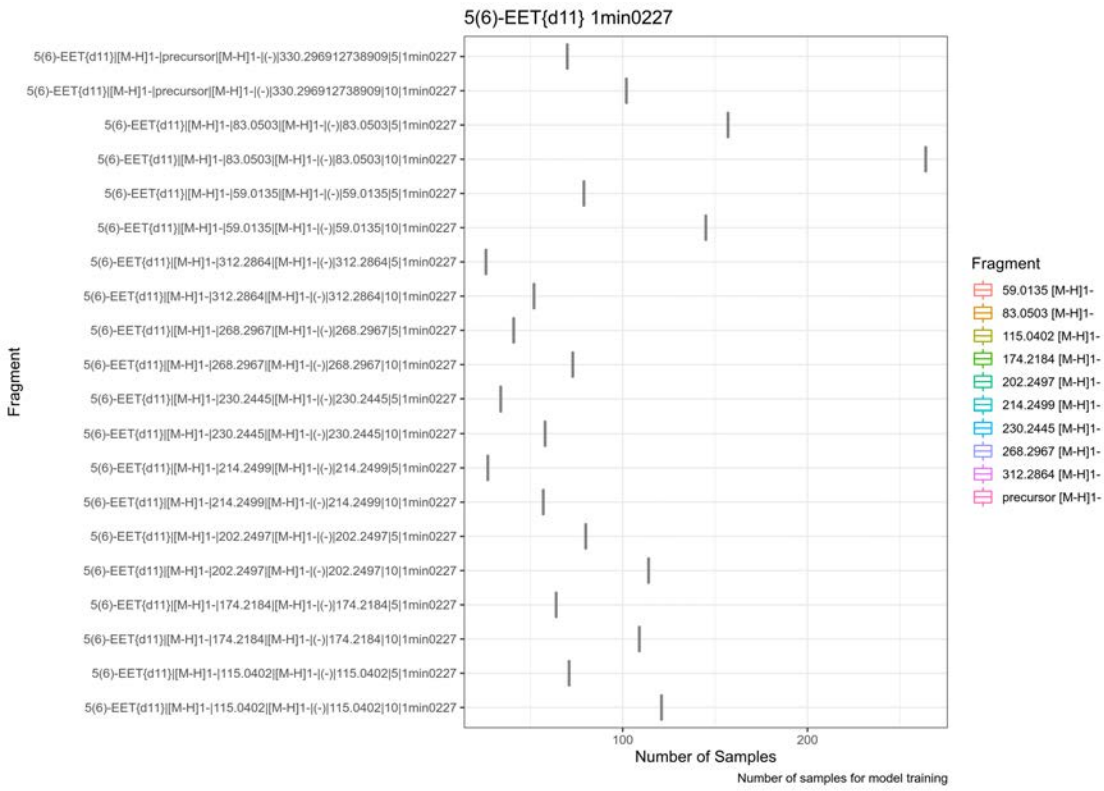

Figure 105. Number of samples used for training per combination Id

## 1.22. 5,6-DiHETE [M-H]1- 1min0116

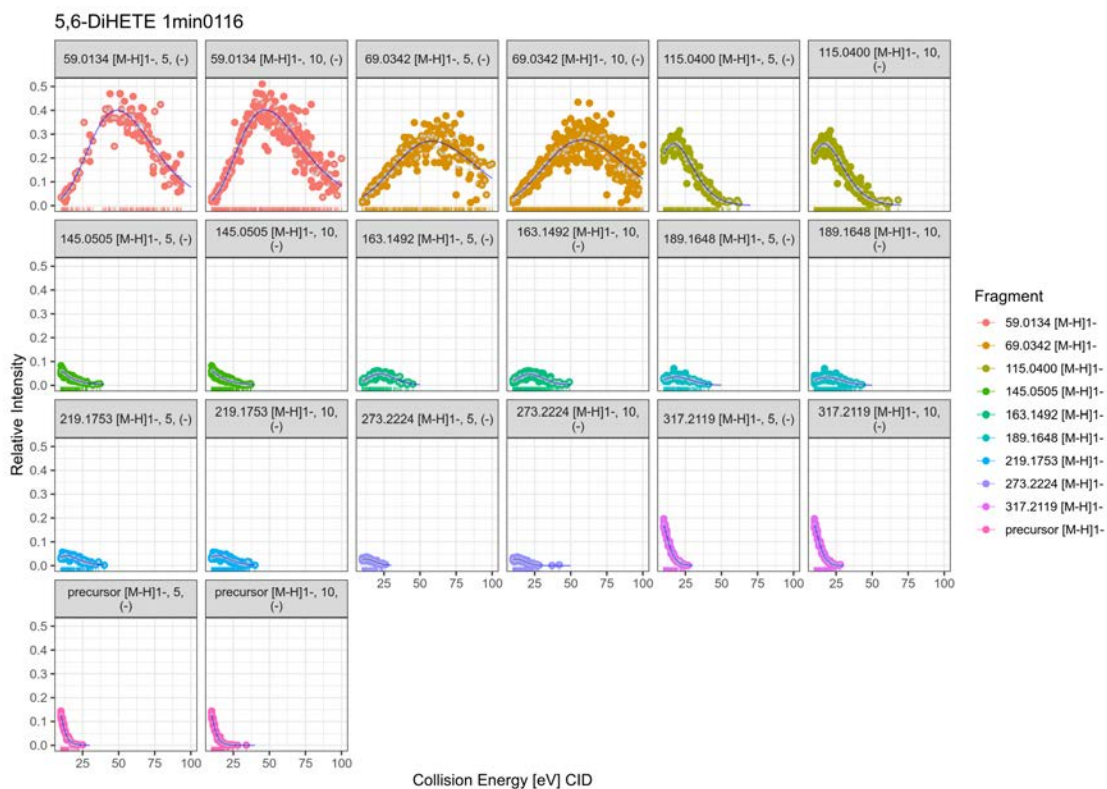

Figure 106. Nonlinear fit

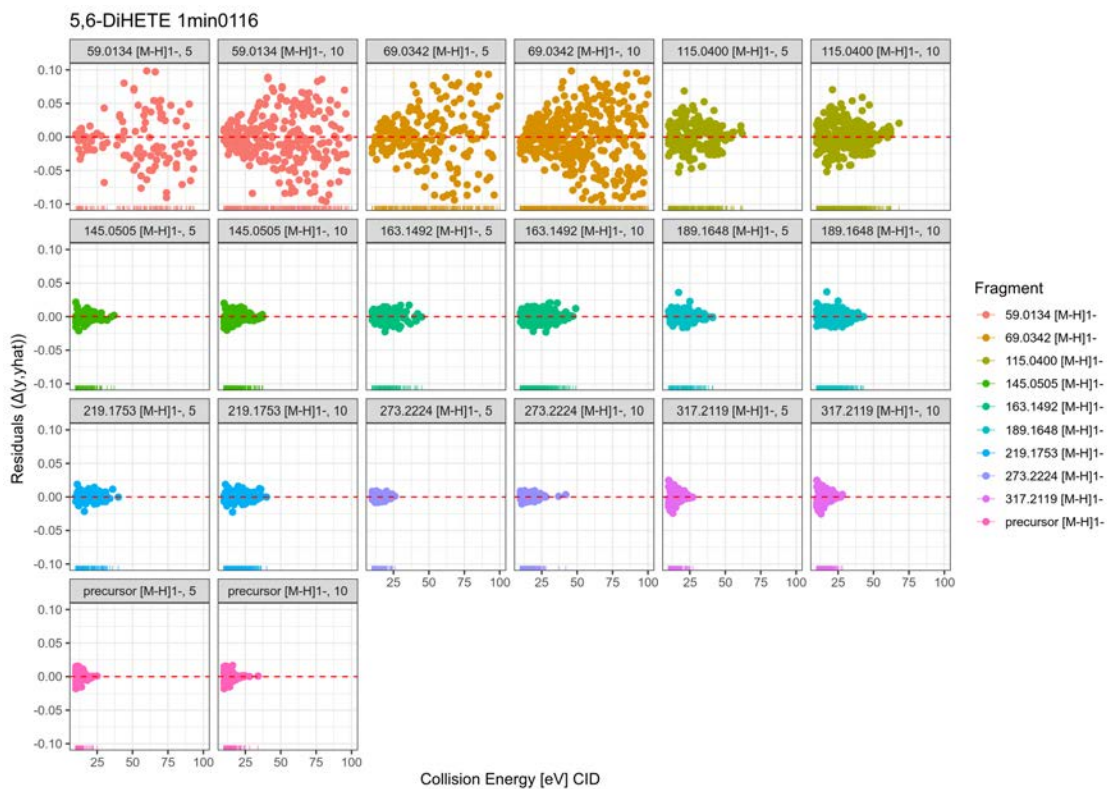

Figure 107. Residuals of nonlinear fit

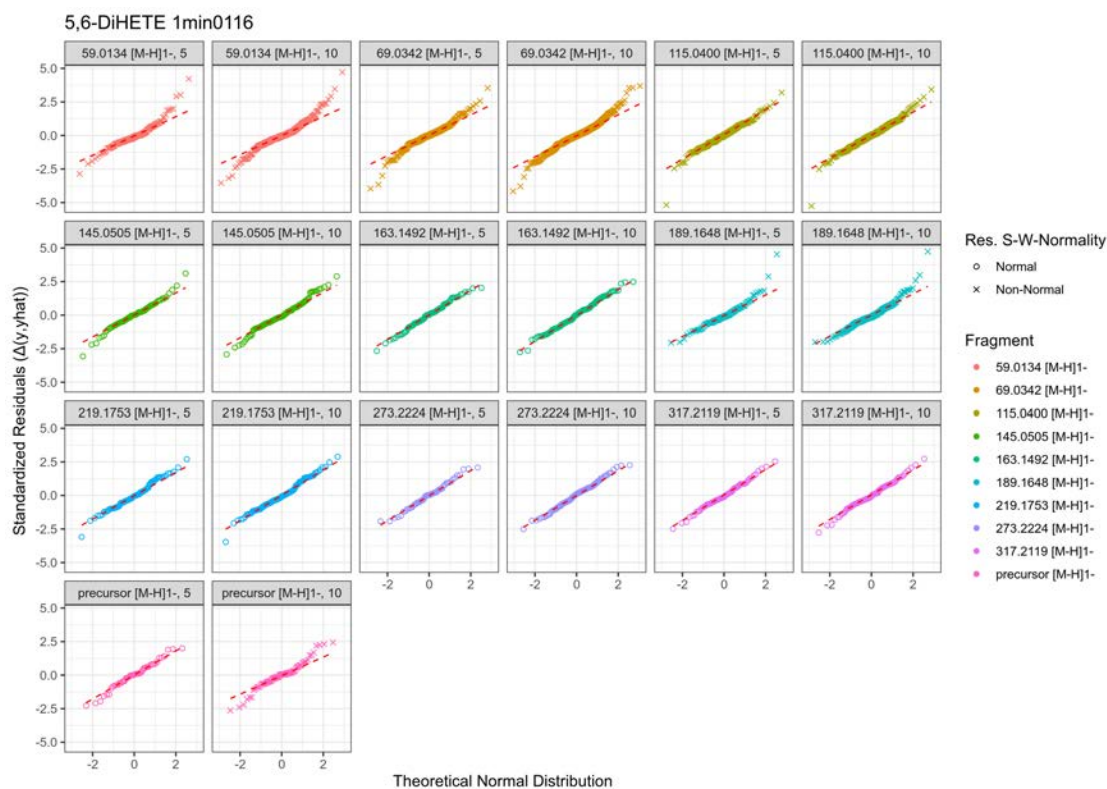

Figure 108. Quantile-quantile plot of residuals

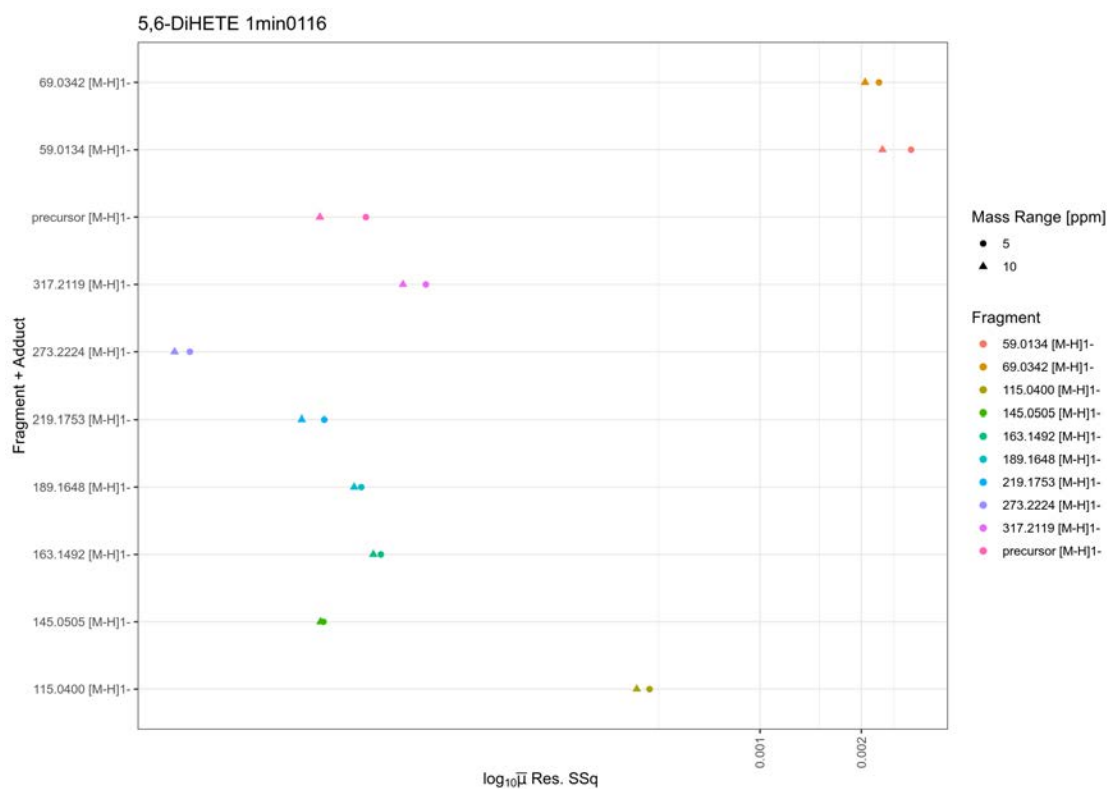

Figure 109. Normalized sum-of-squares of the residuals

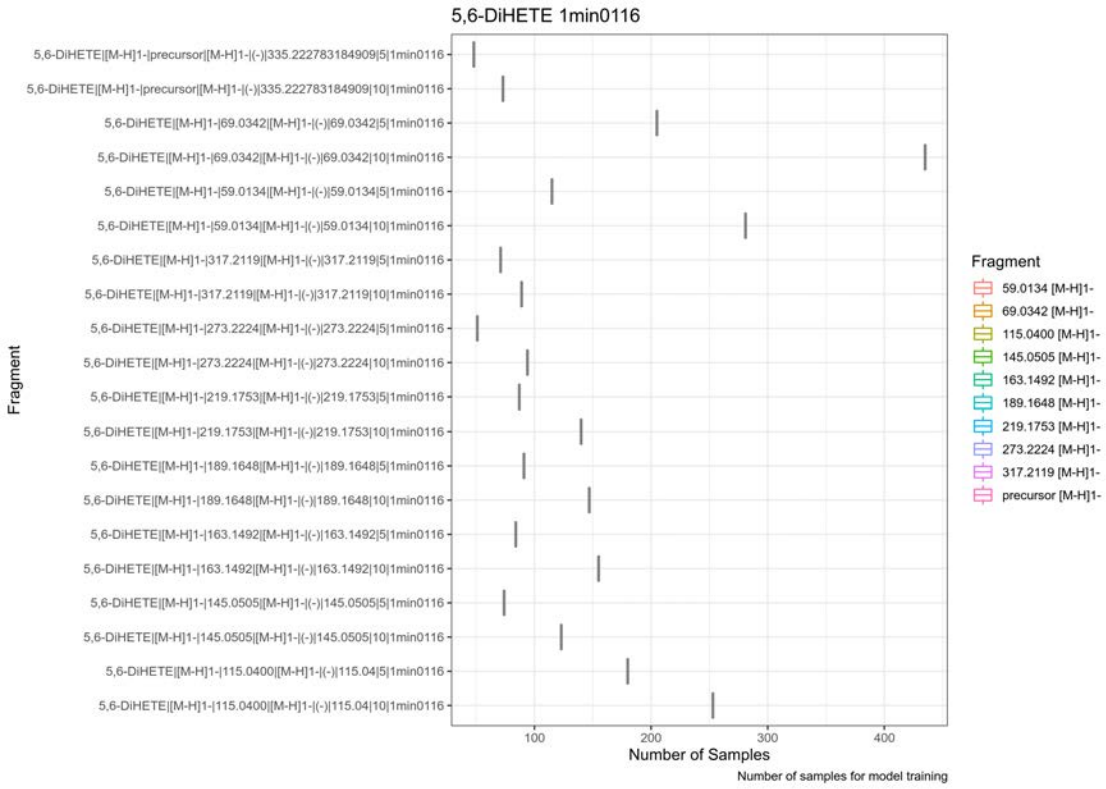

Figure 110. Number of samples used for training per combination Id



## 1.23. 5-HEPE [M-H]1- 1min0203

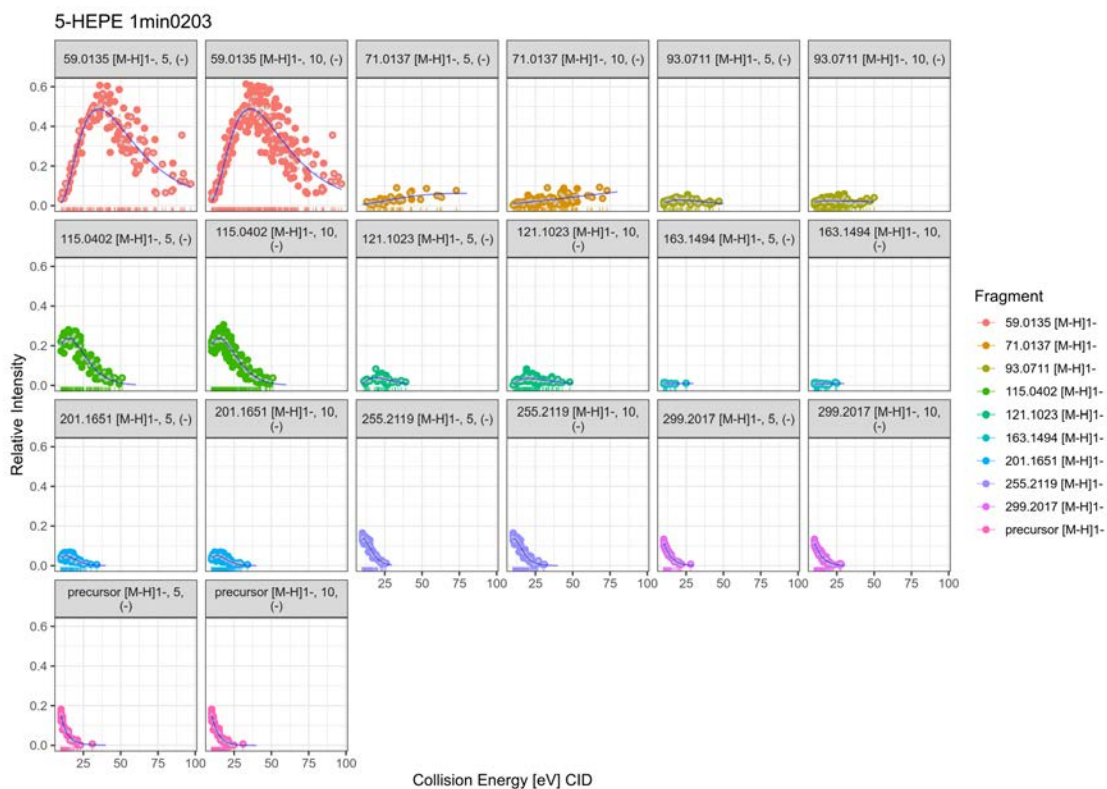

Figure 111. Nonlinear fit

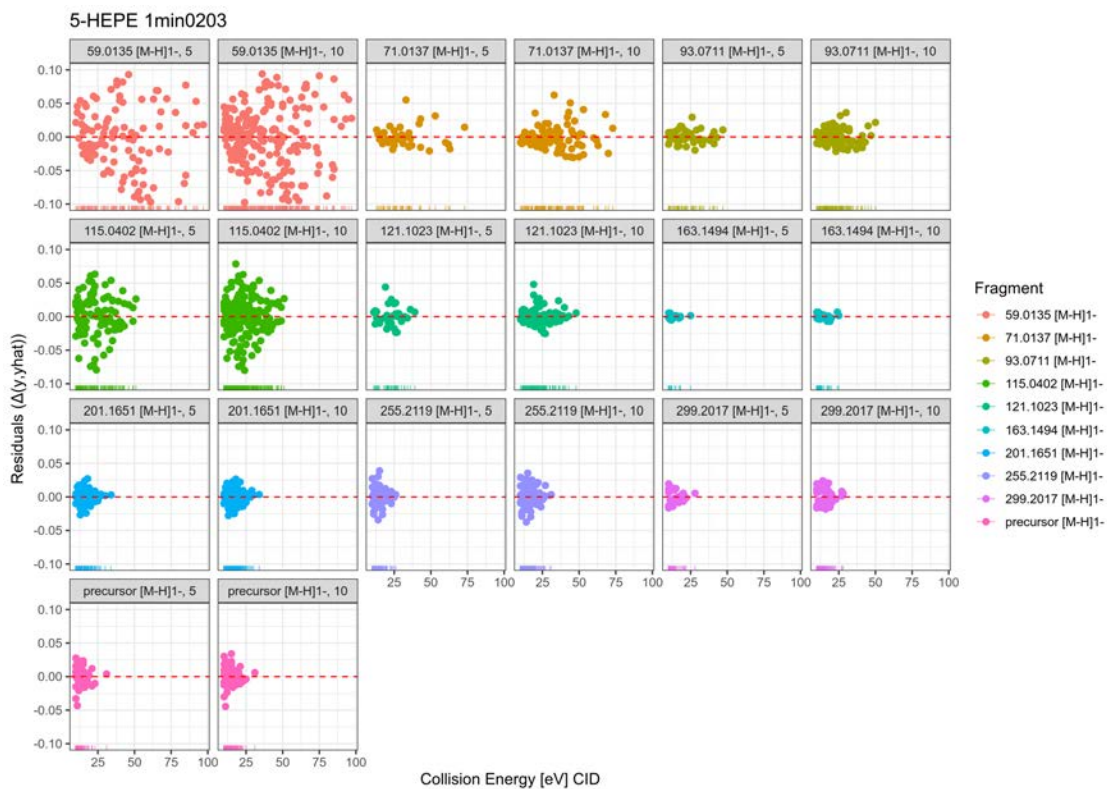

Figure 112. Residuals of nonlinear fit

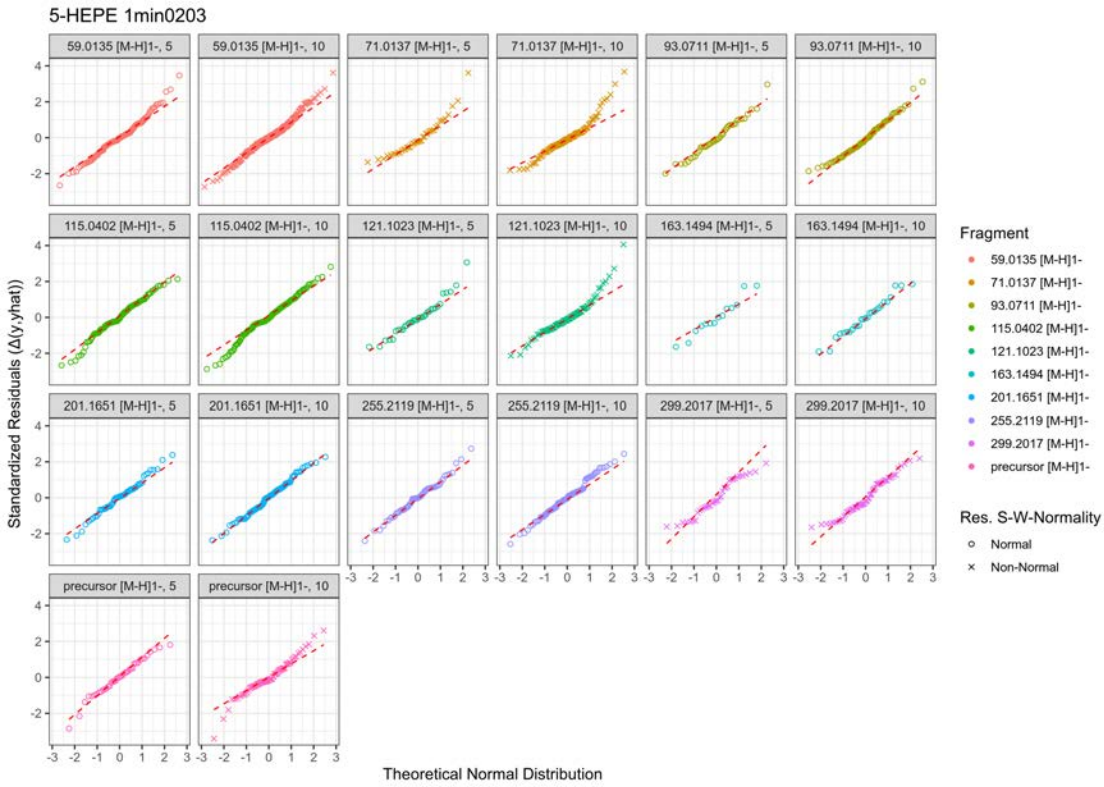

Figure 113. Quantile-quantile plot of residuals

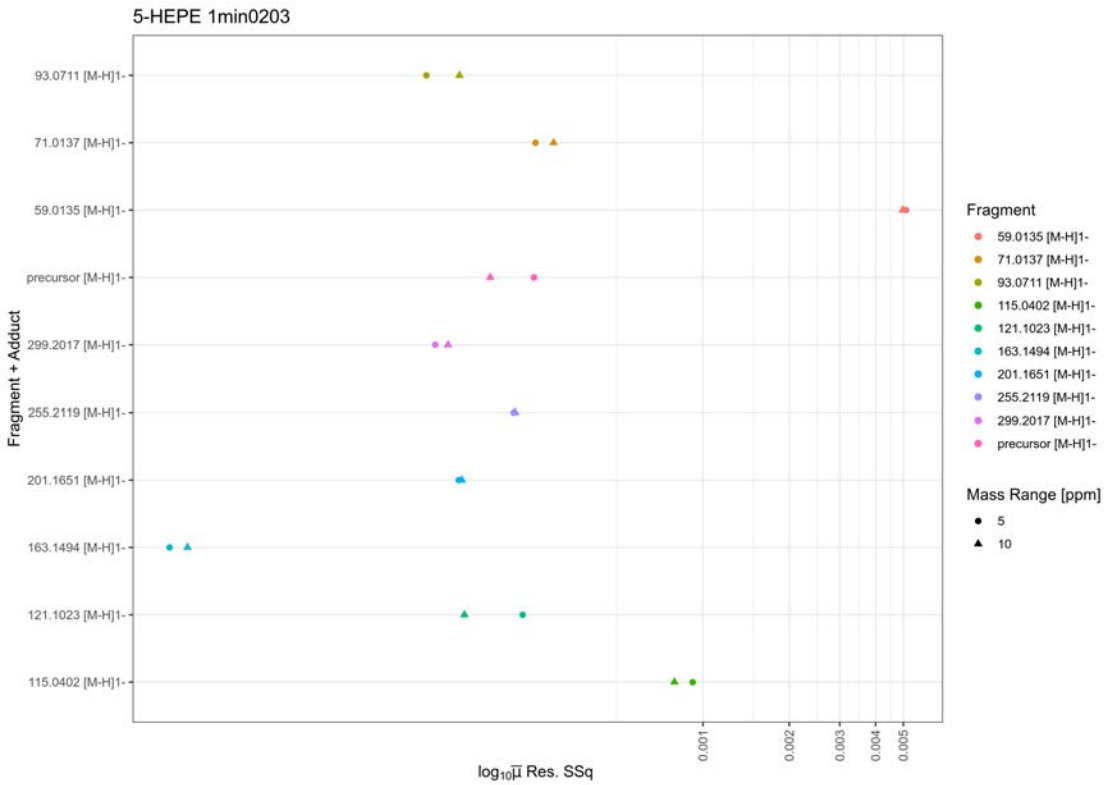

Figure 114. Normalized sum-of-squares of the residuals

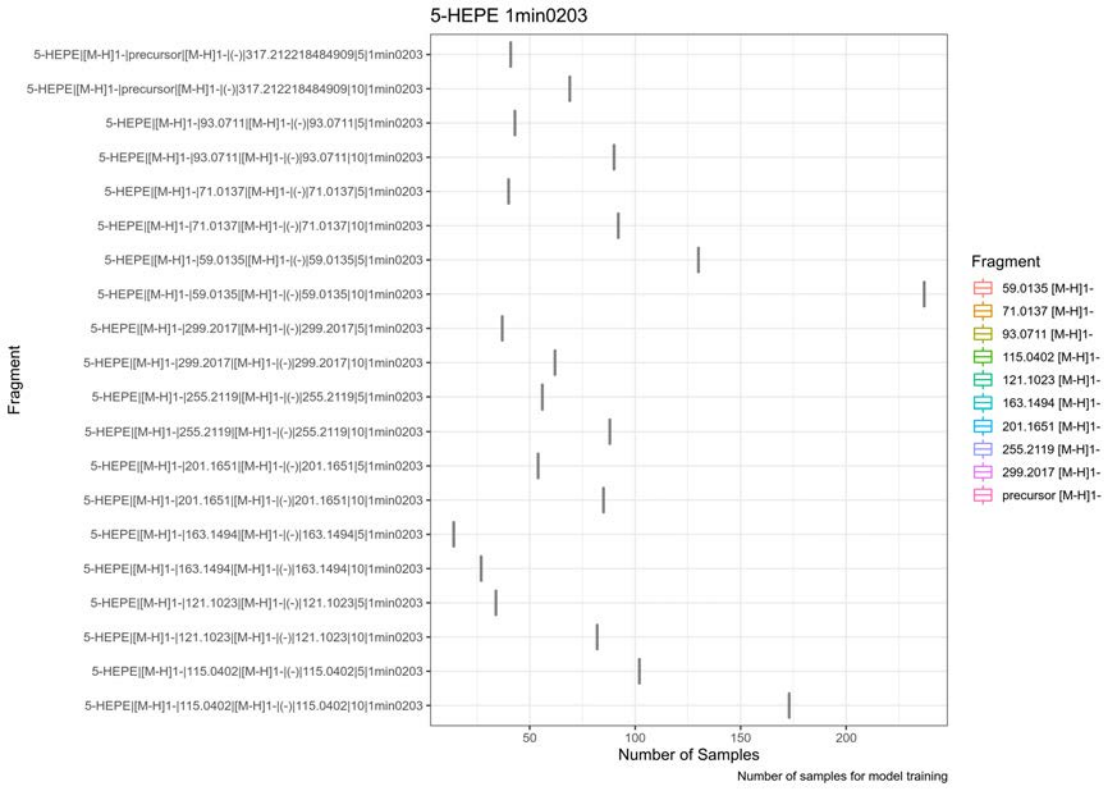

Figure 115. Number of samples used for training per combination Id

## 1.24. 5-HETE{d8} [M-H]1- 1min0215

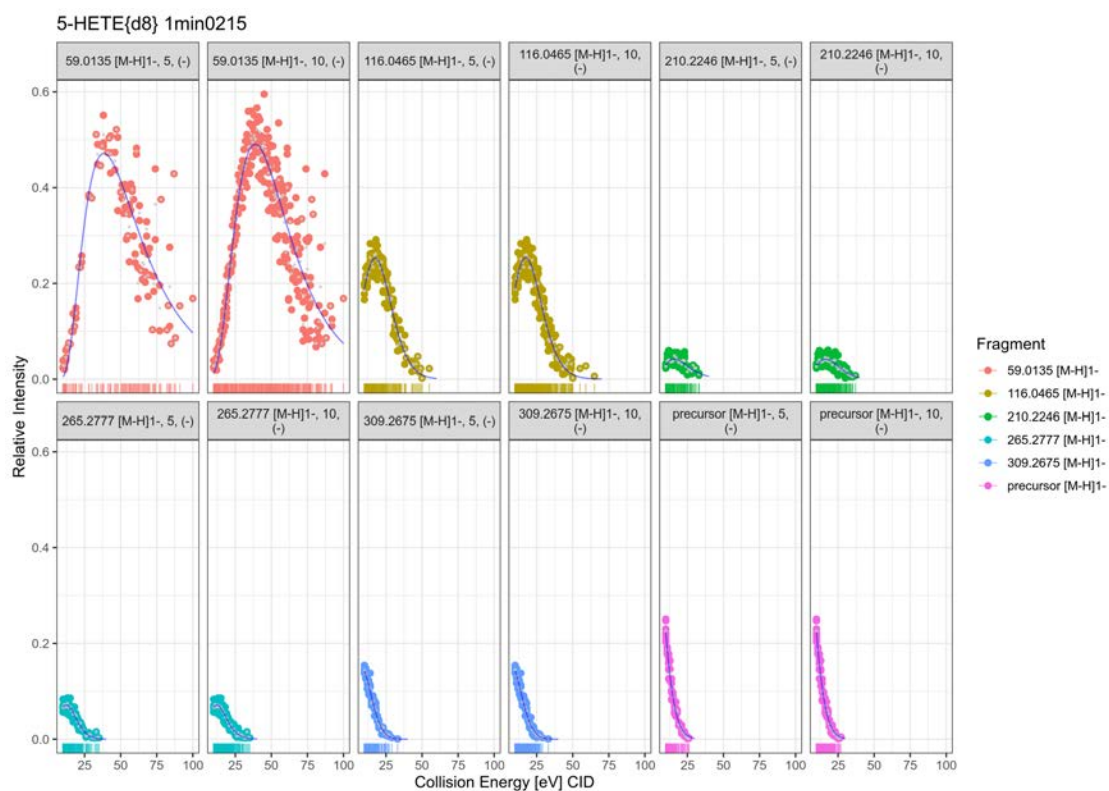

Figure 116. Nonlinear fit

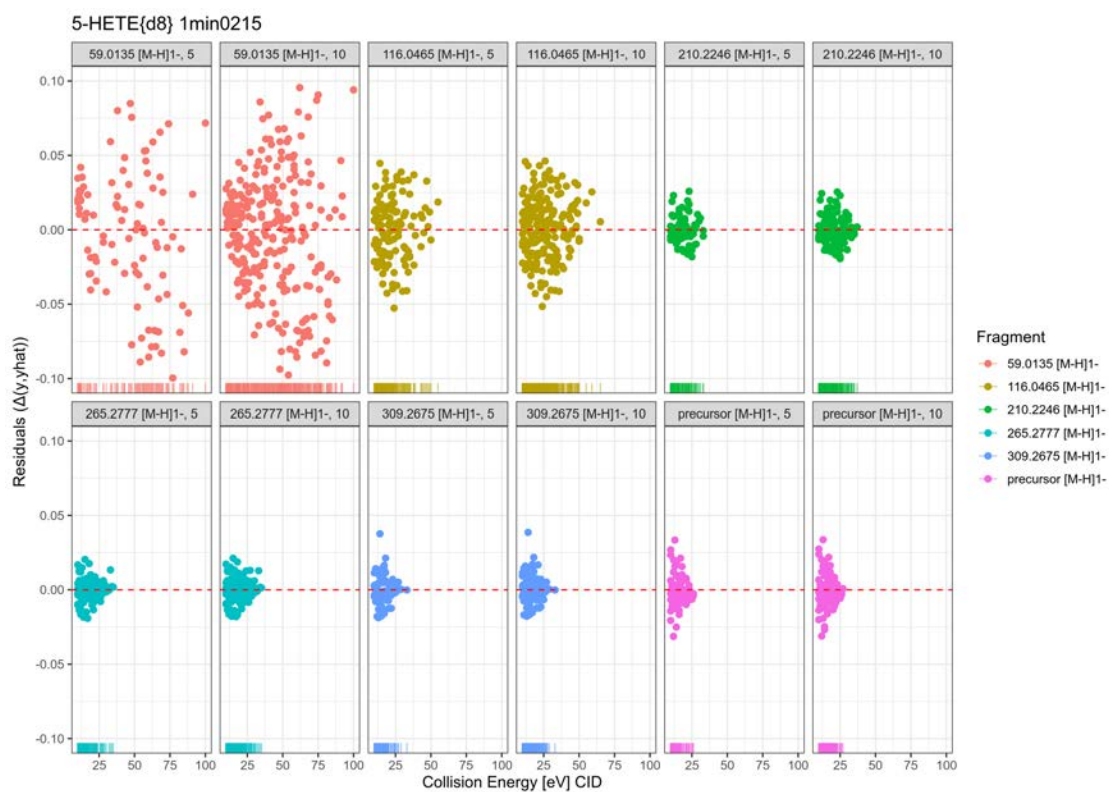

Figure 117. Residuals of nonlinear fit

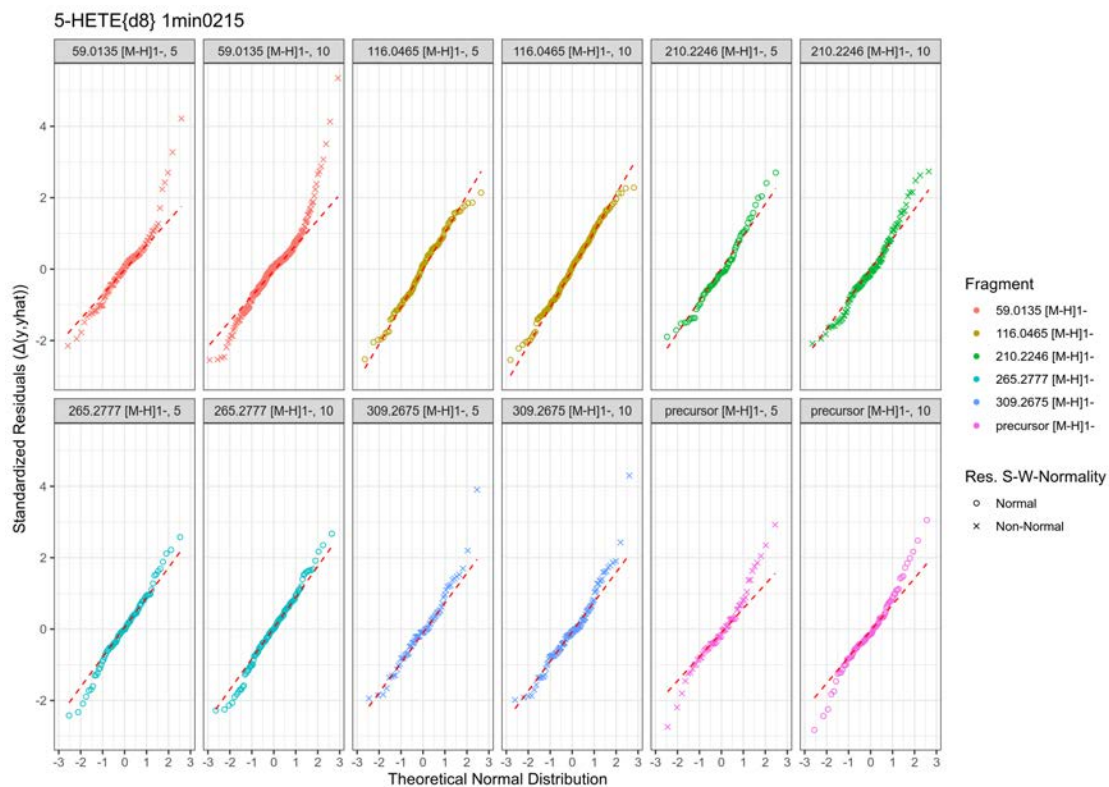

Figure 118. Quantile-quantile plot of residuals

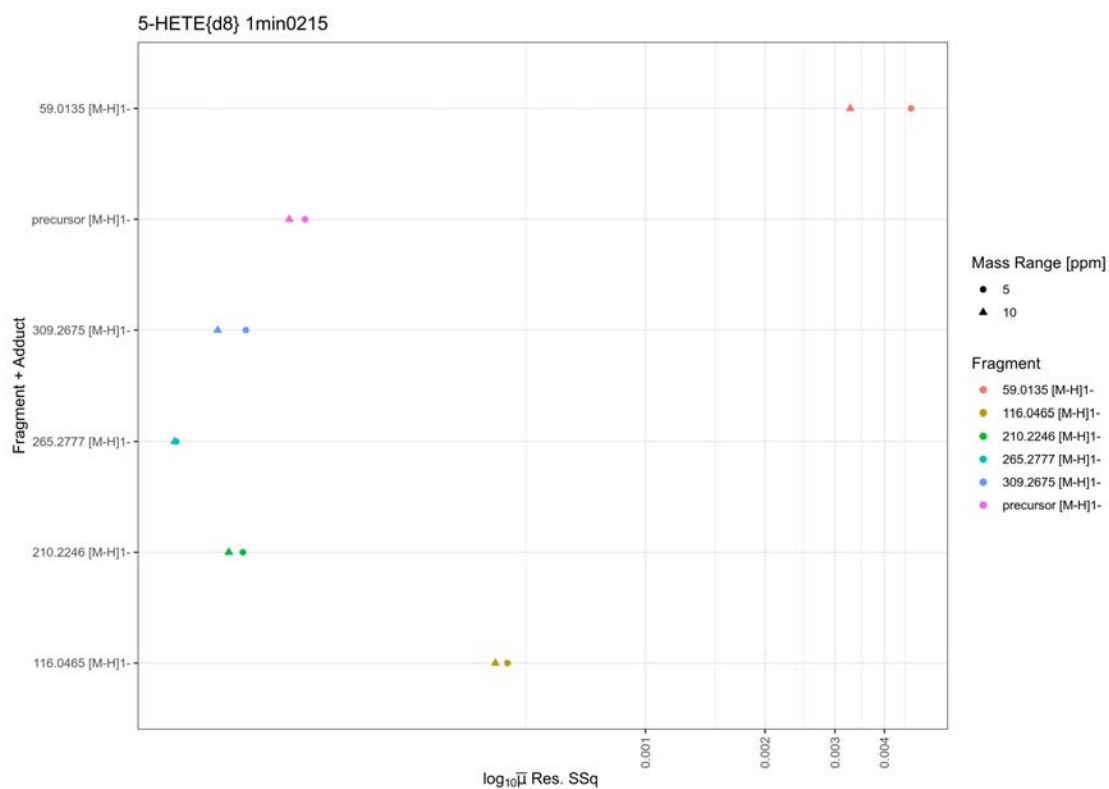

Figure 119. Normalized sum-of-squares of the residuals



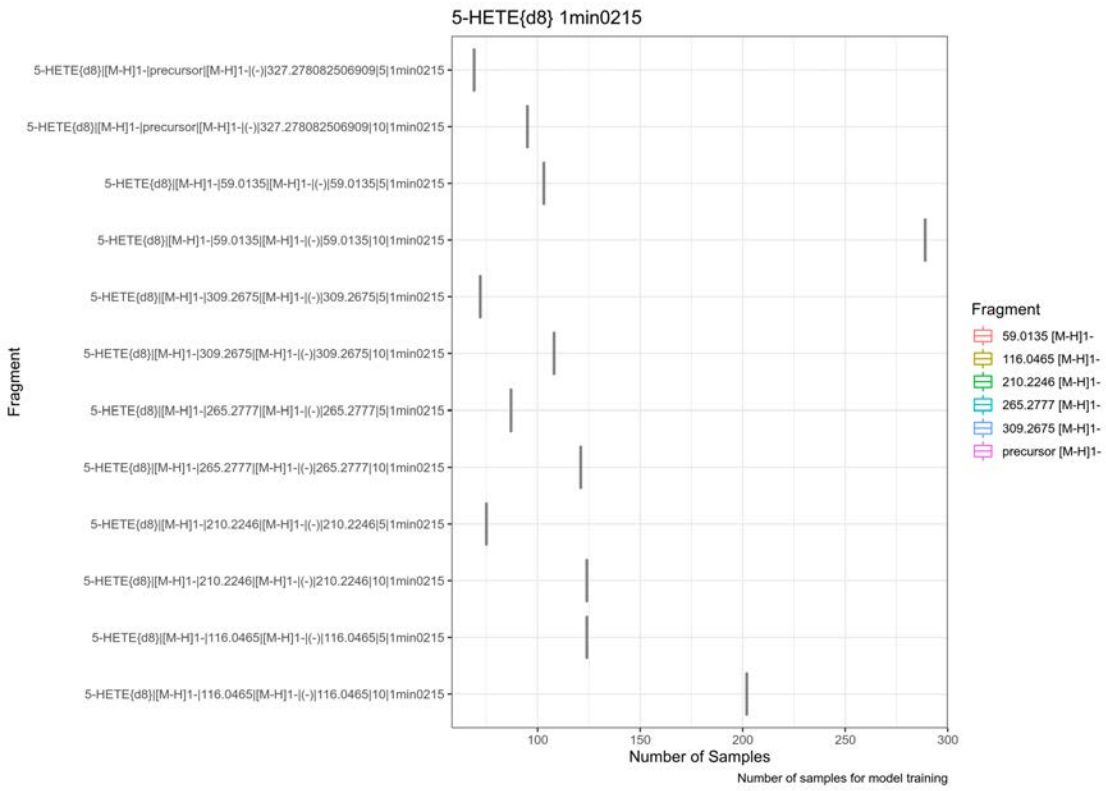

Figure 120. Number of samples used for training per combination Id

# 1.25. 5-OxoETE{d7} [M-H]1- 1min0217

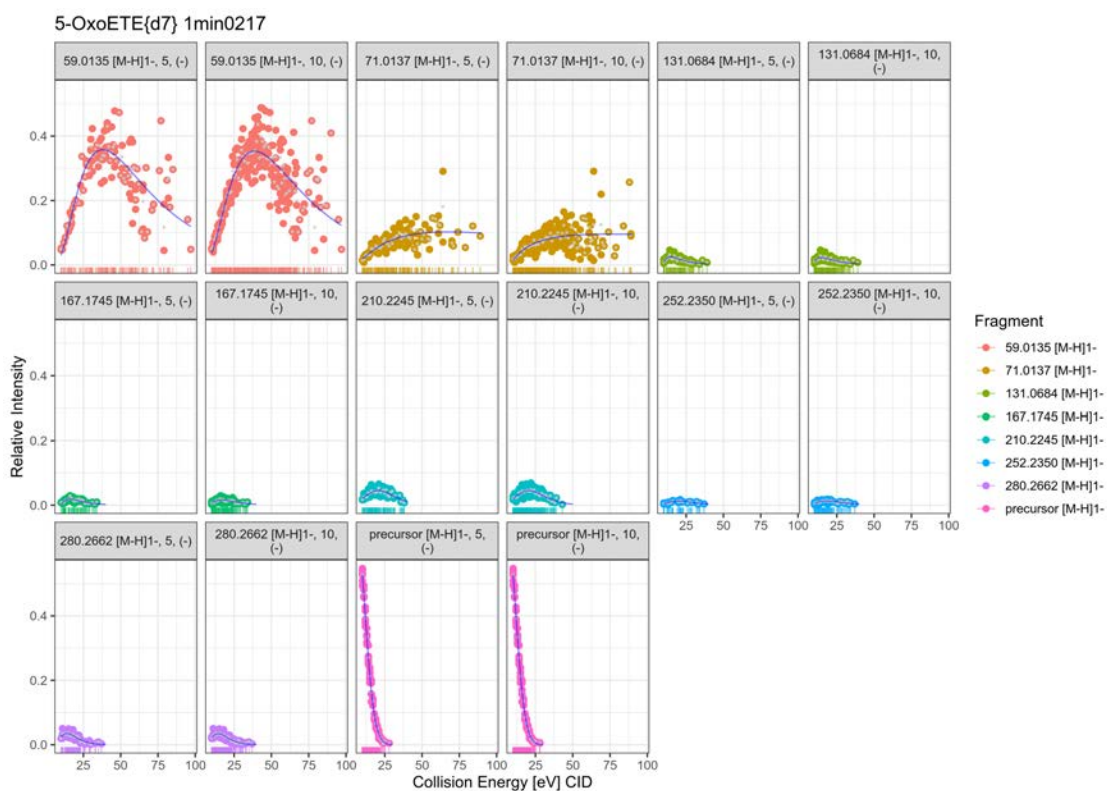

Figure 121. Nonlinear fit

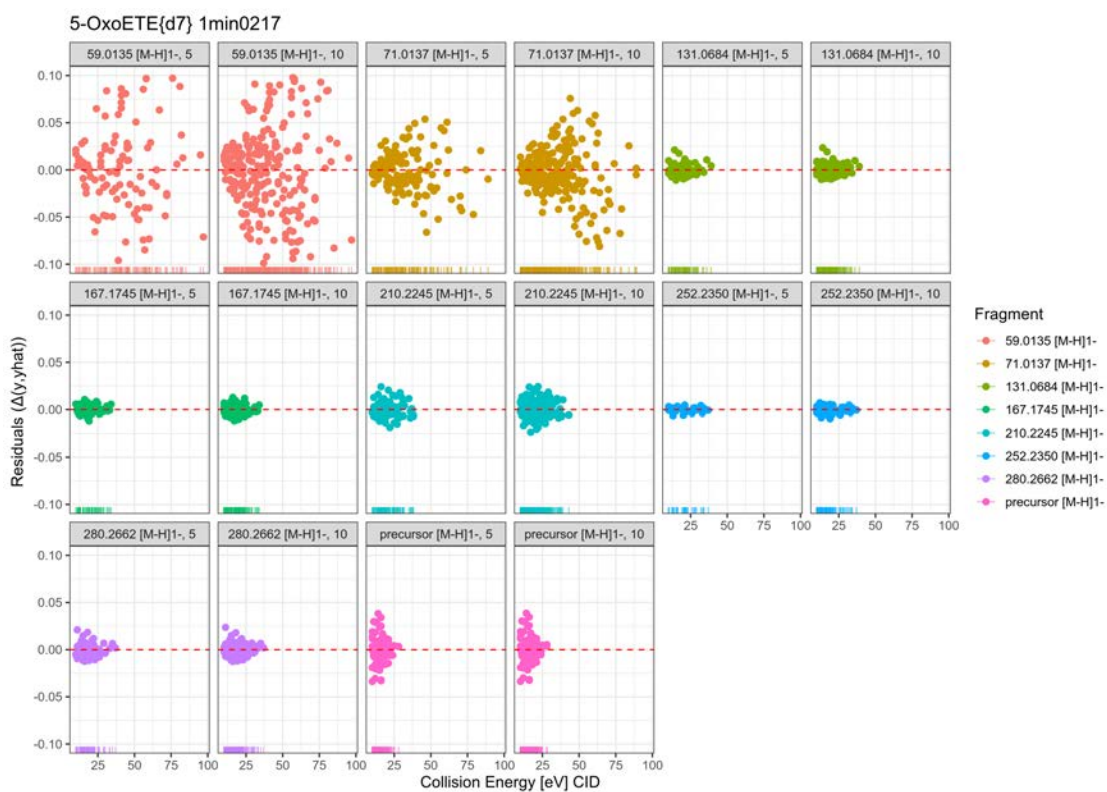

Figure 122. Residuals of nonlinear fit

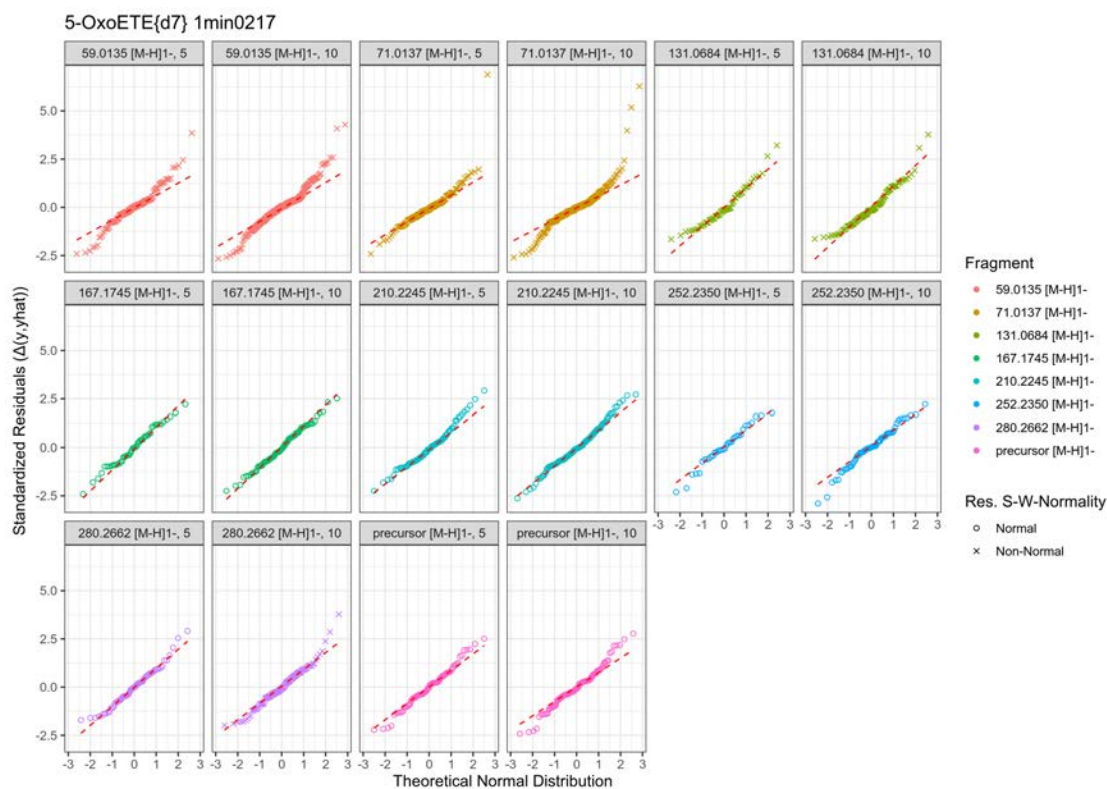

Figure 123. Quantile-quantile plot of residuals

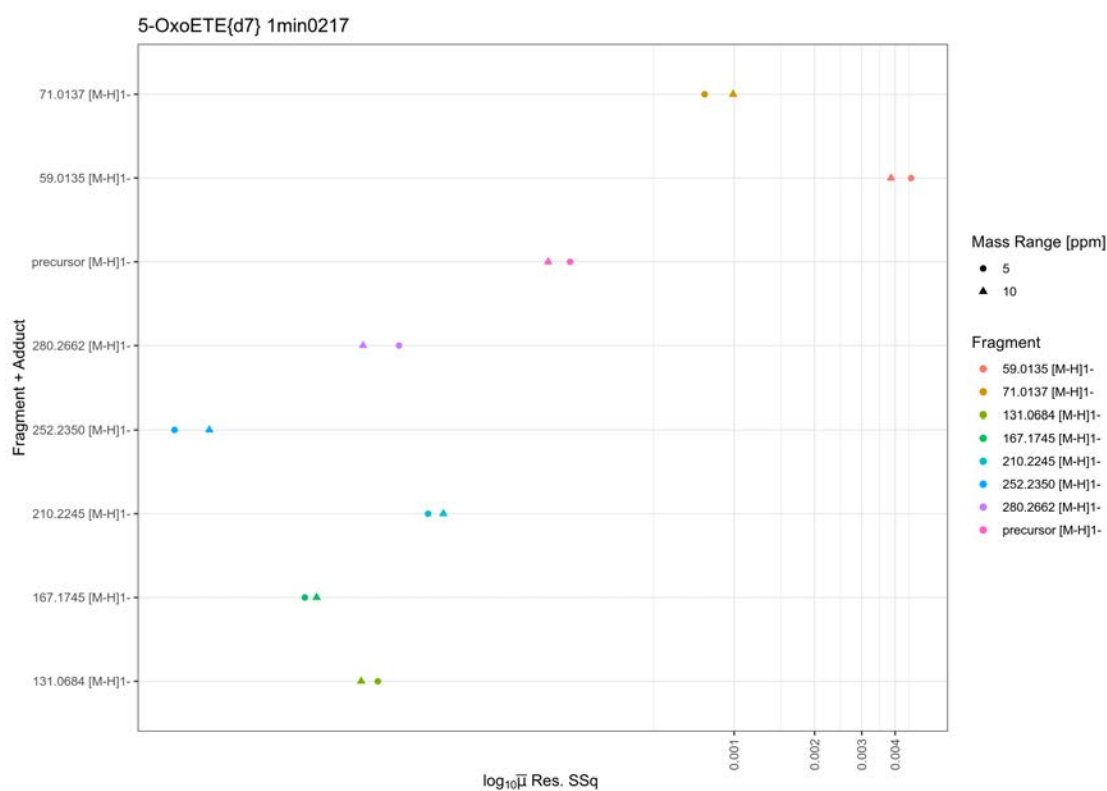

Figure 124. Normalized sum-of-squares of the residuals

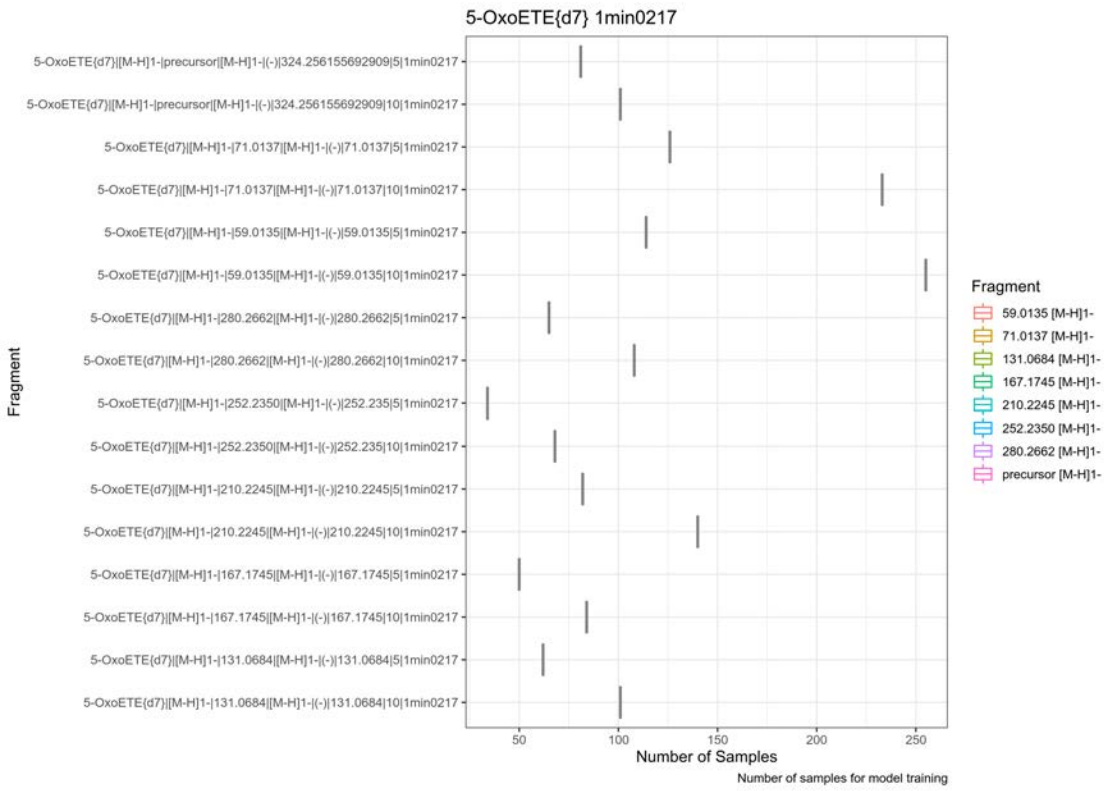

Figure 125. Number of samples used for training per combination Id

# 1.26. 8(9)-EET{d11} [M-H]1- 1min0118

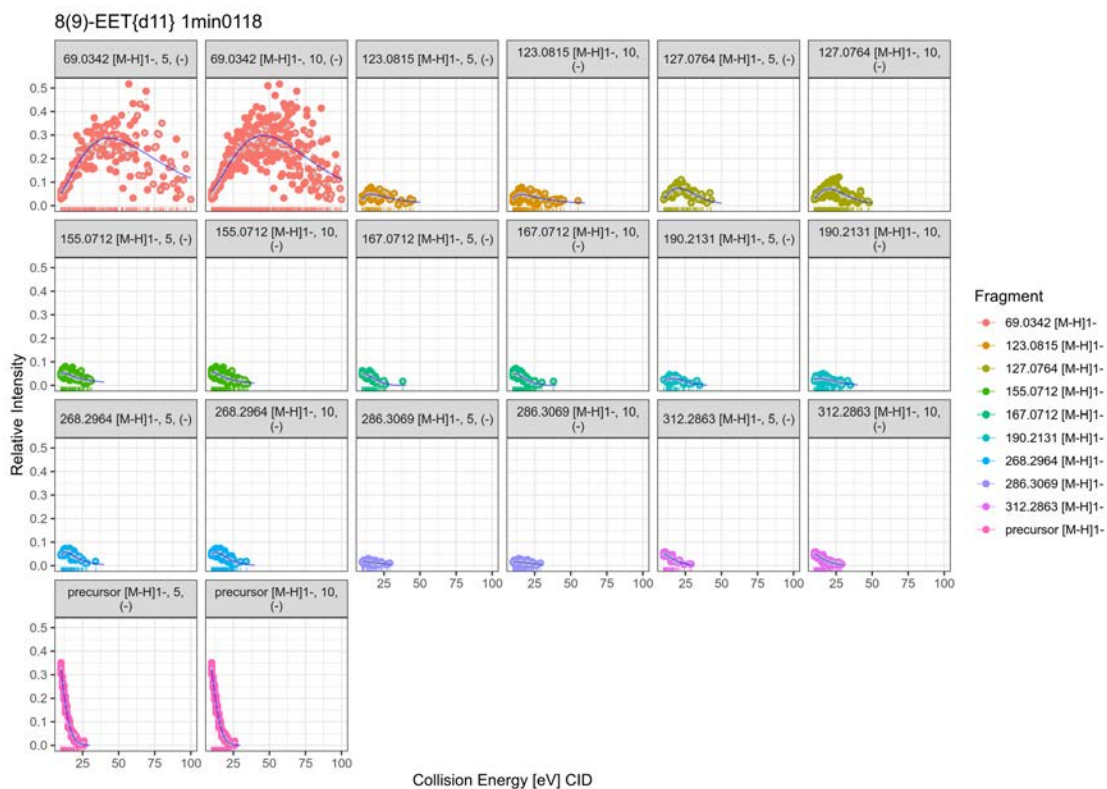

Figure 126. Nonlinear fit

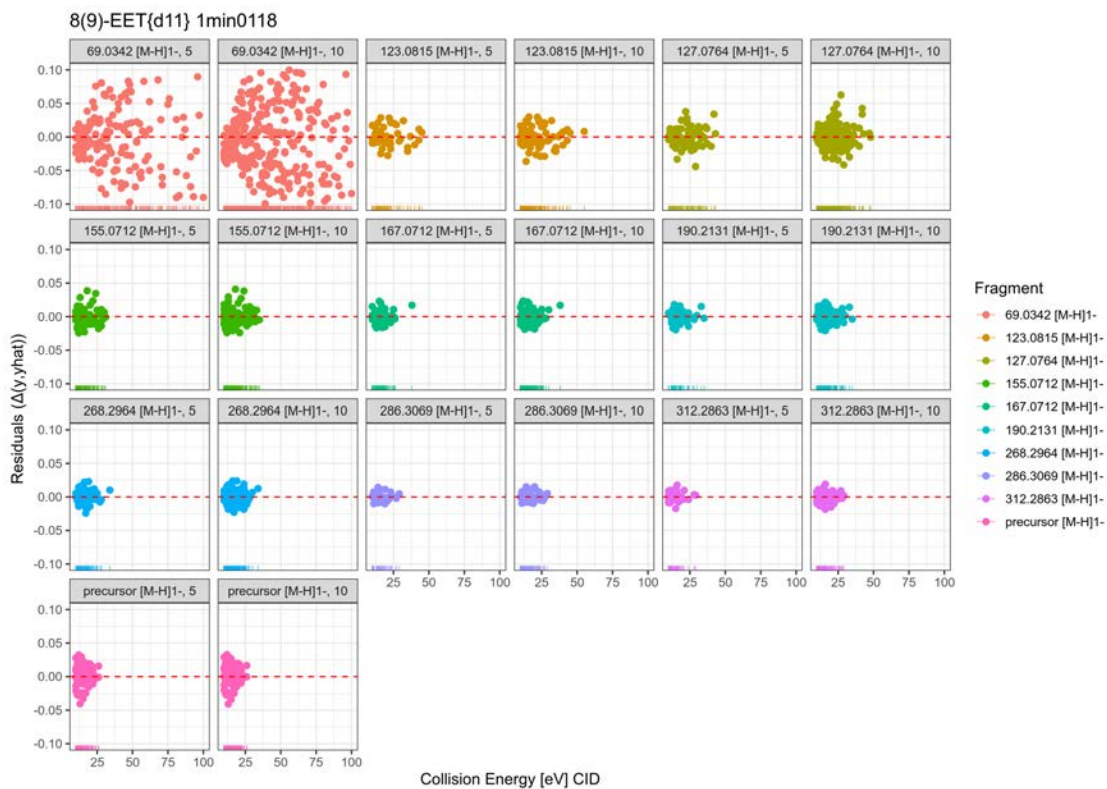

Figure 127. Residuals of nonlinear fit



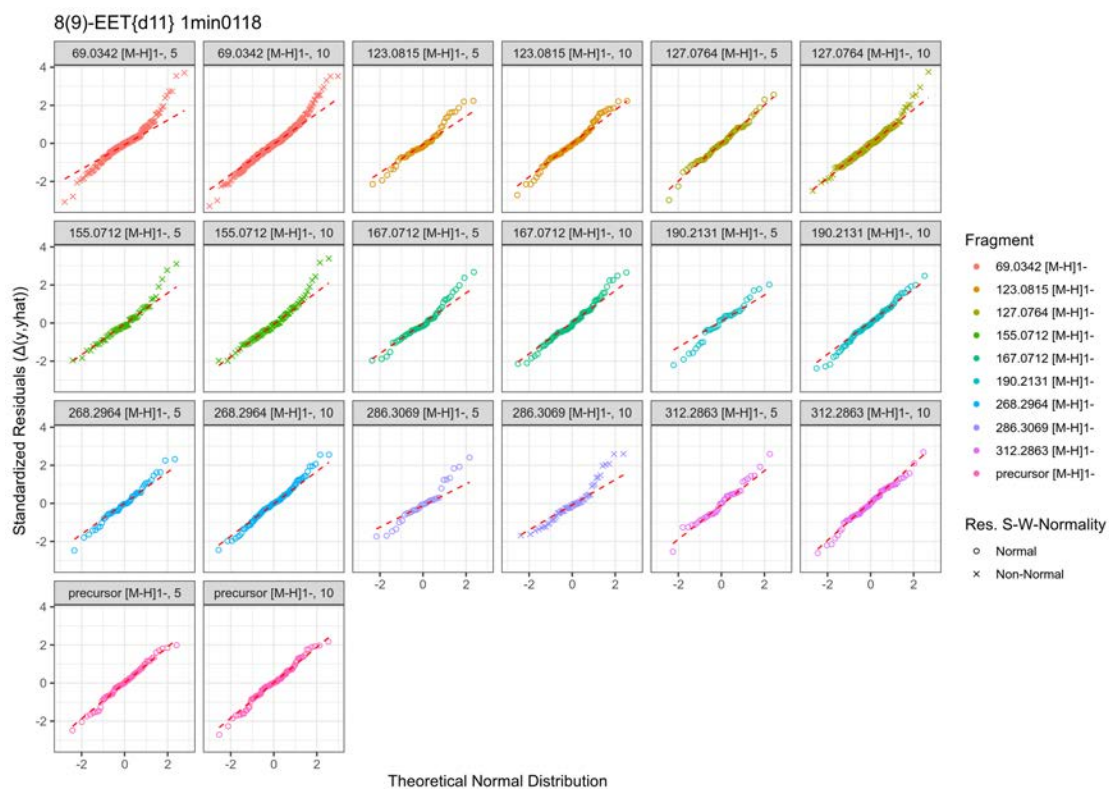

Figure 128. Quantile-quantile plot of residuals

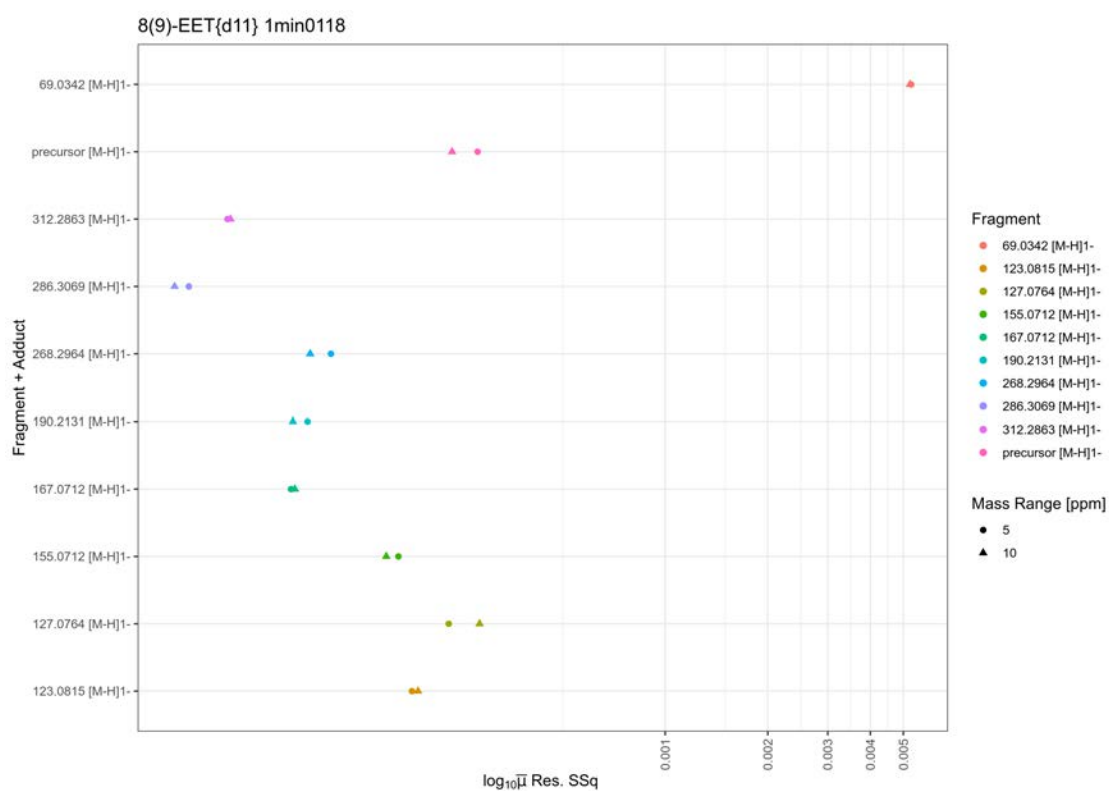

Figure 129. Normalized sum-of-squares of the residuals

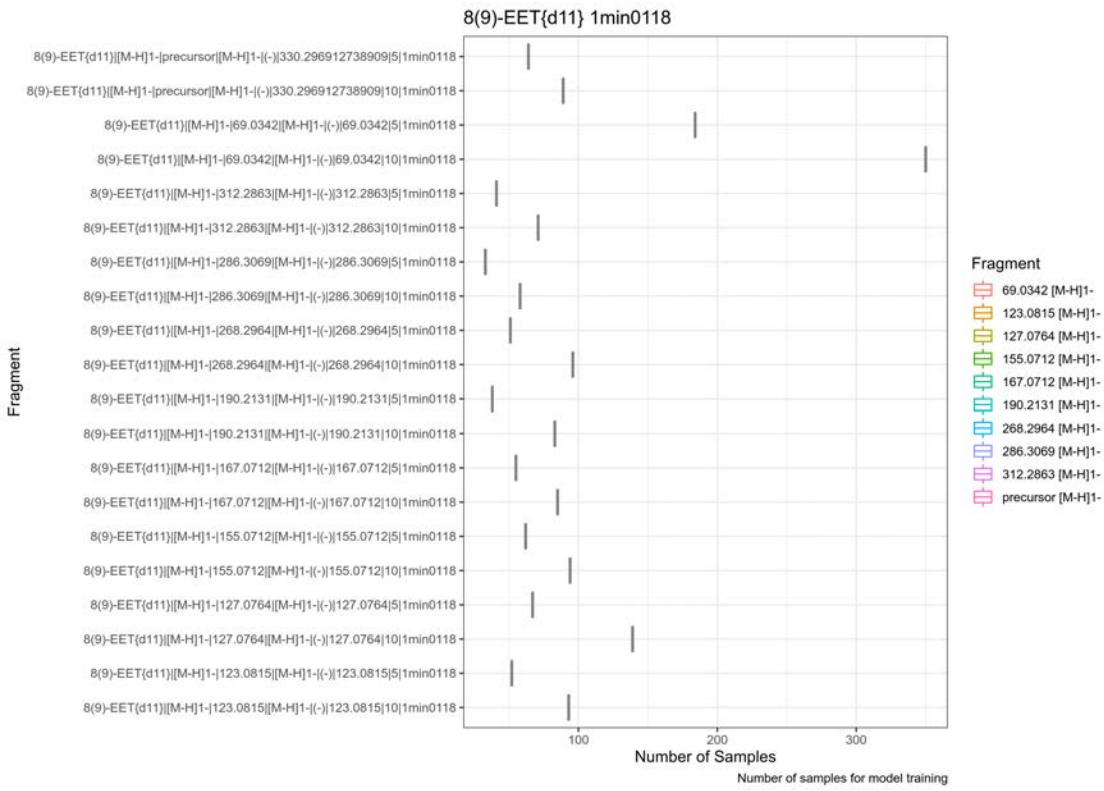

Figure 130. Number of samples used for training per combination Id

# 1.27. 8,9-DHET{d11} [M-H]1- 1min0235

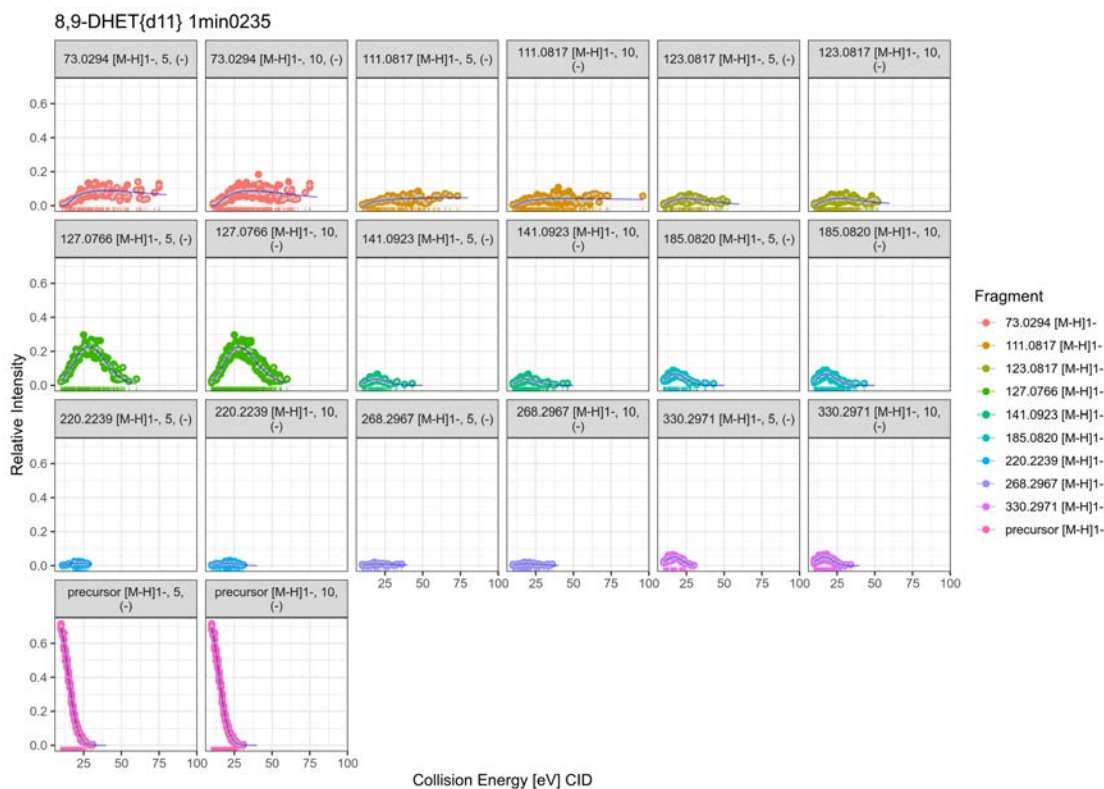

Figure 131. Nonlinear fit

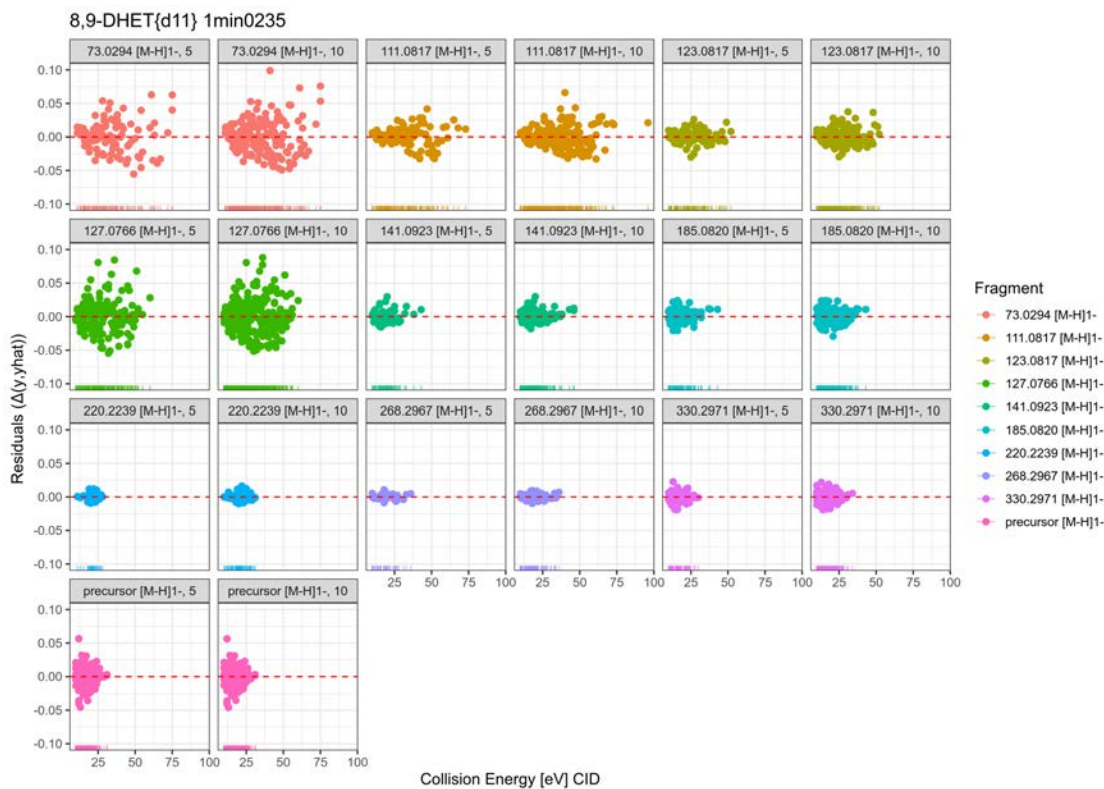

Figure 132. Residuals of nonlinear fit

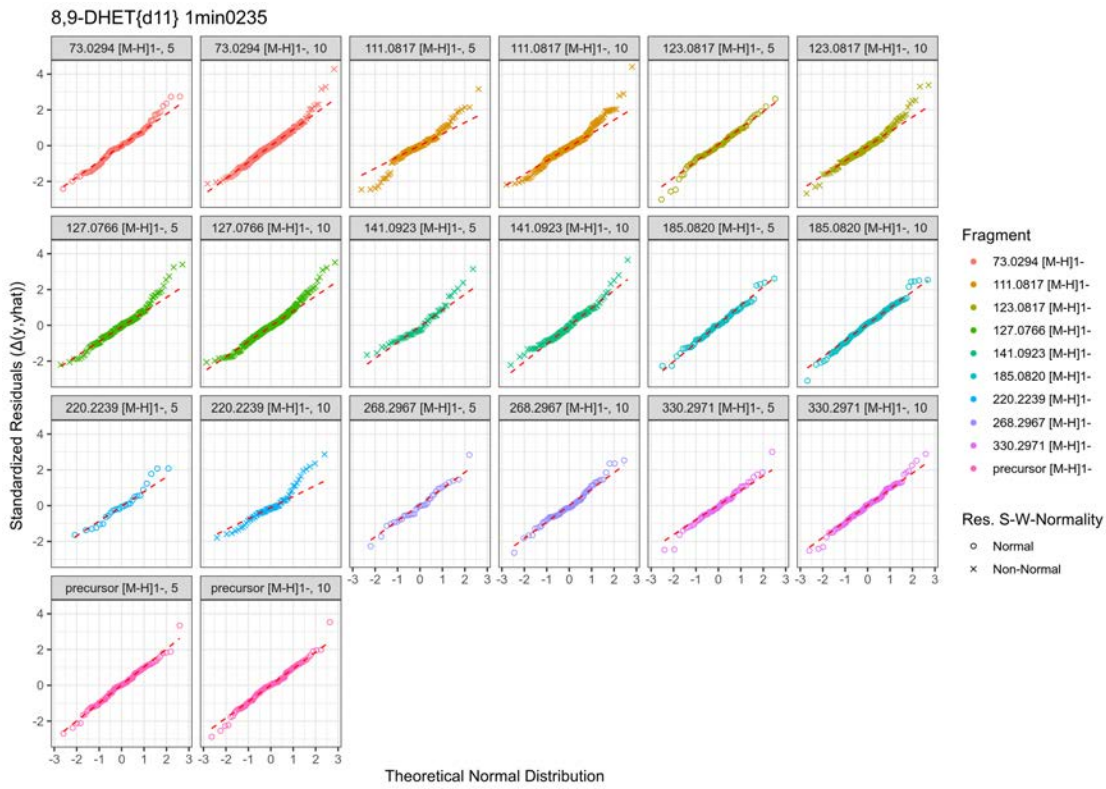

Figure 133. Quantile-quantile plot of residuals

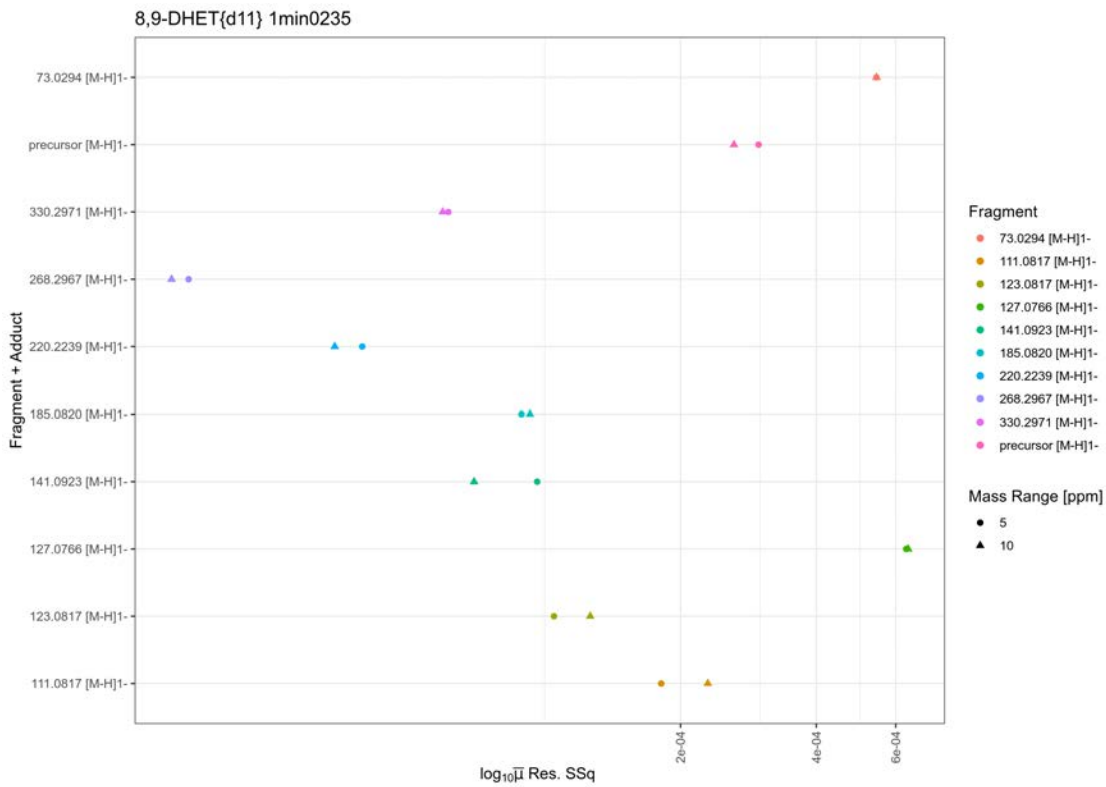

Figure 134. Normalized sum-of-squares of the residuals

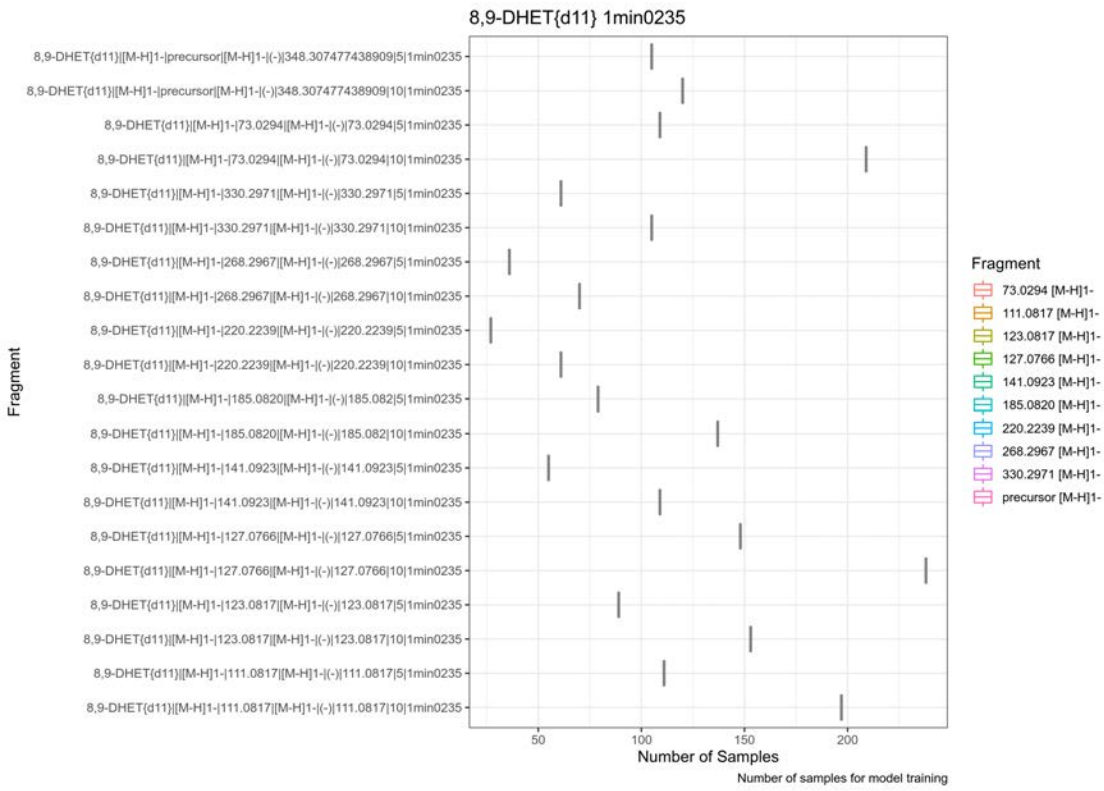

Figure 135. Number of samples used for training per combination Id



# 1.28. 8-HDoHE [M-H]1- 1min0120

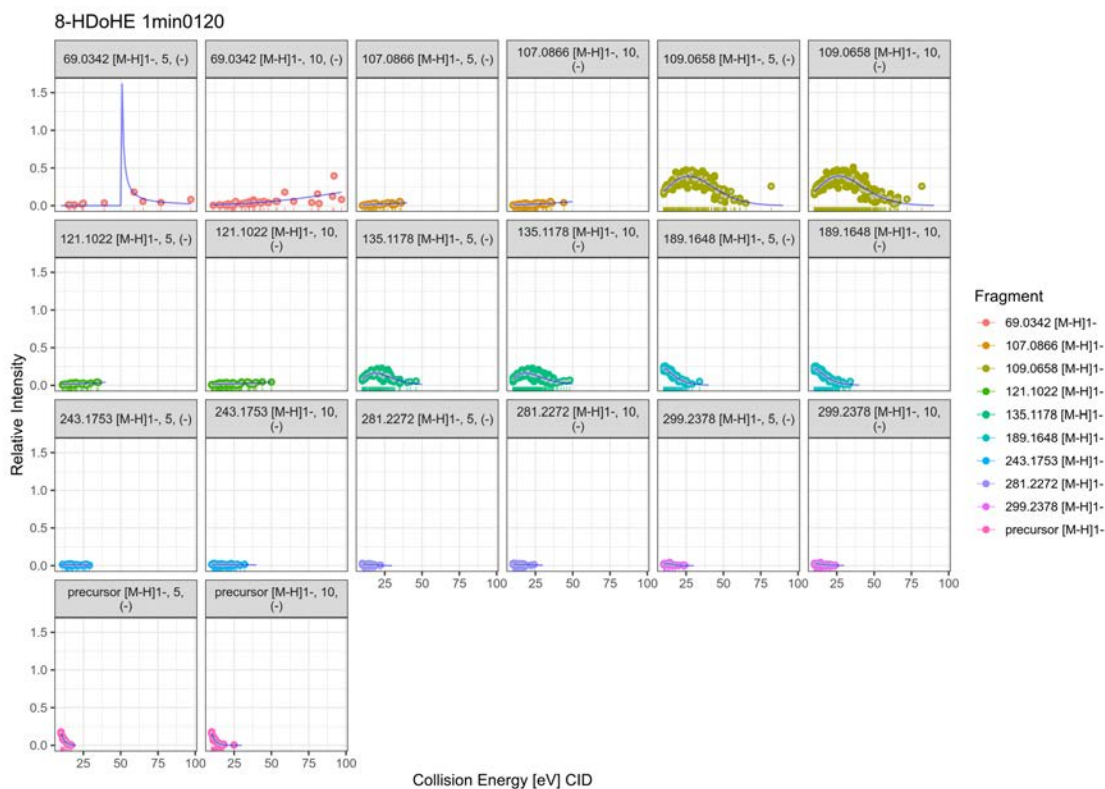

Figure 136. Nonlinear fit

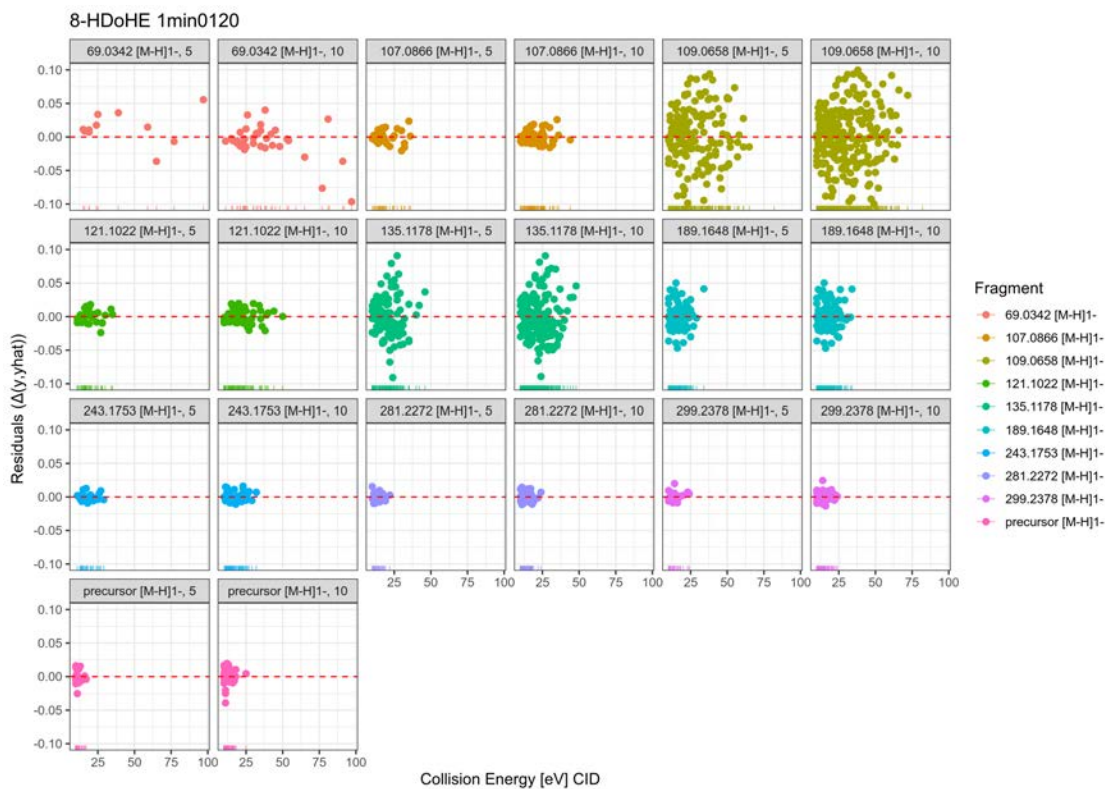

Figure 137. Residuals of nonlinear fit

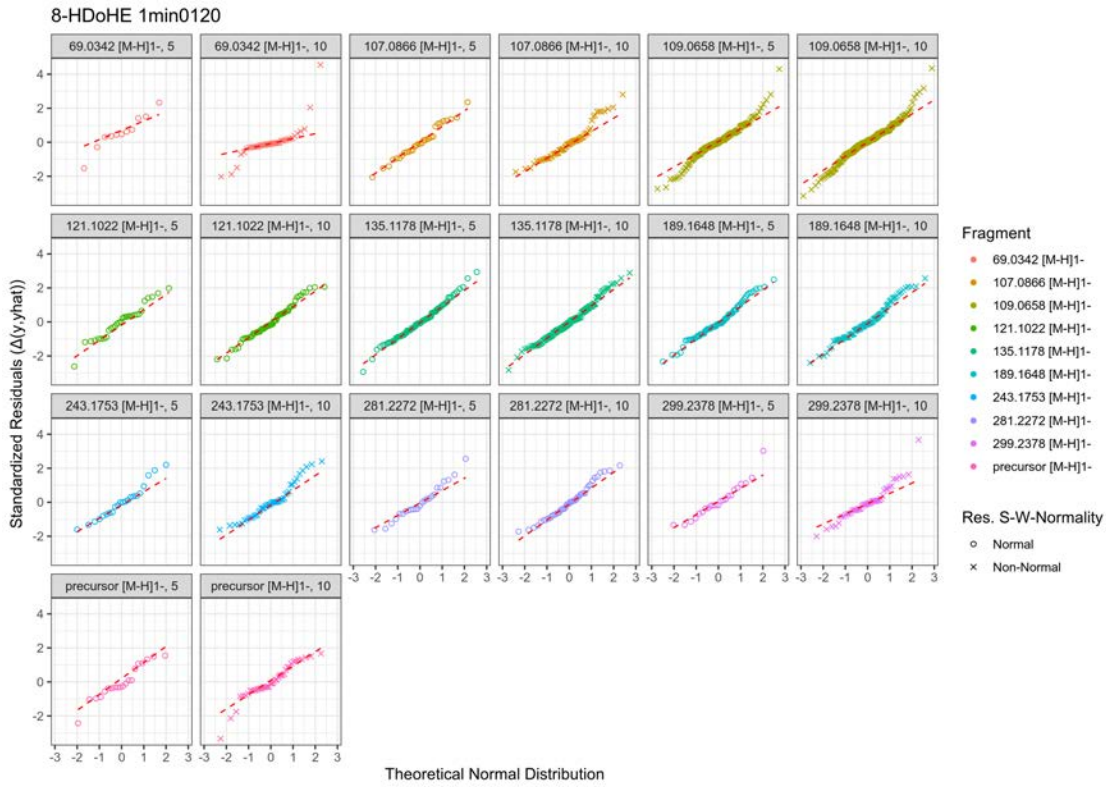

Figure 138. Quantile-quantile plot of residuals

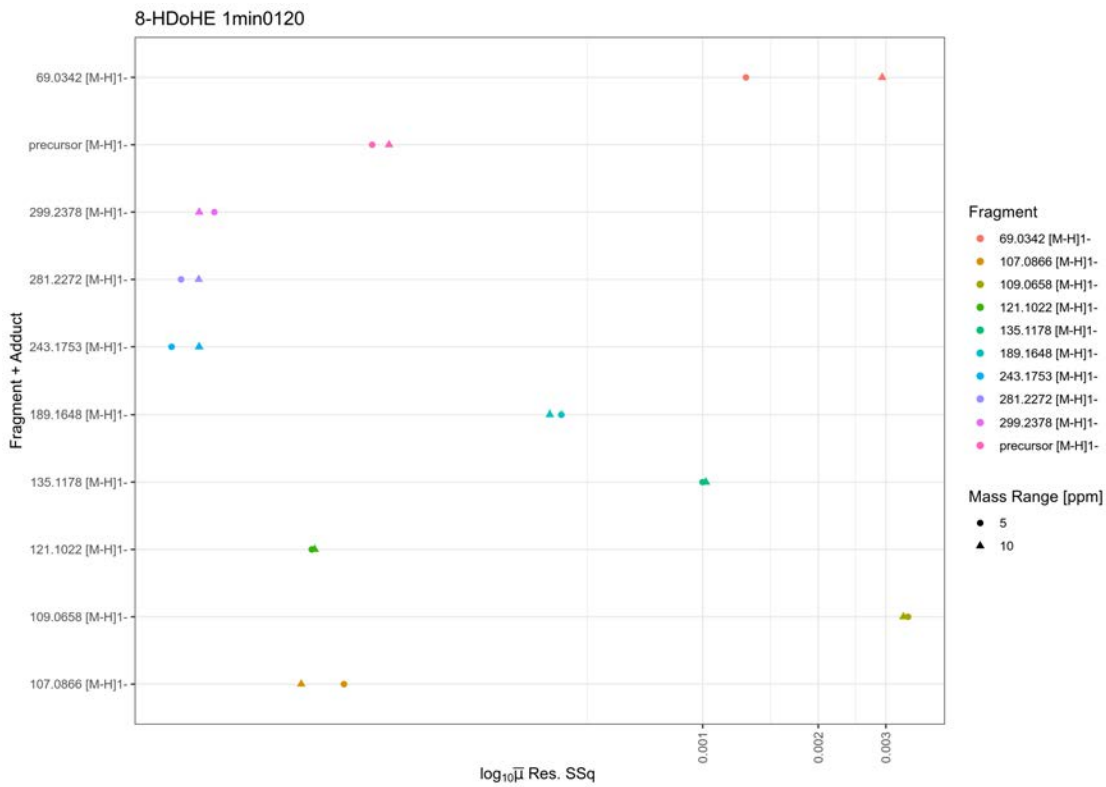

Figure 139. Normalized sum-of-squares of the residuals

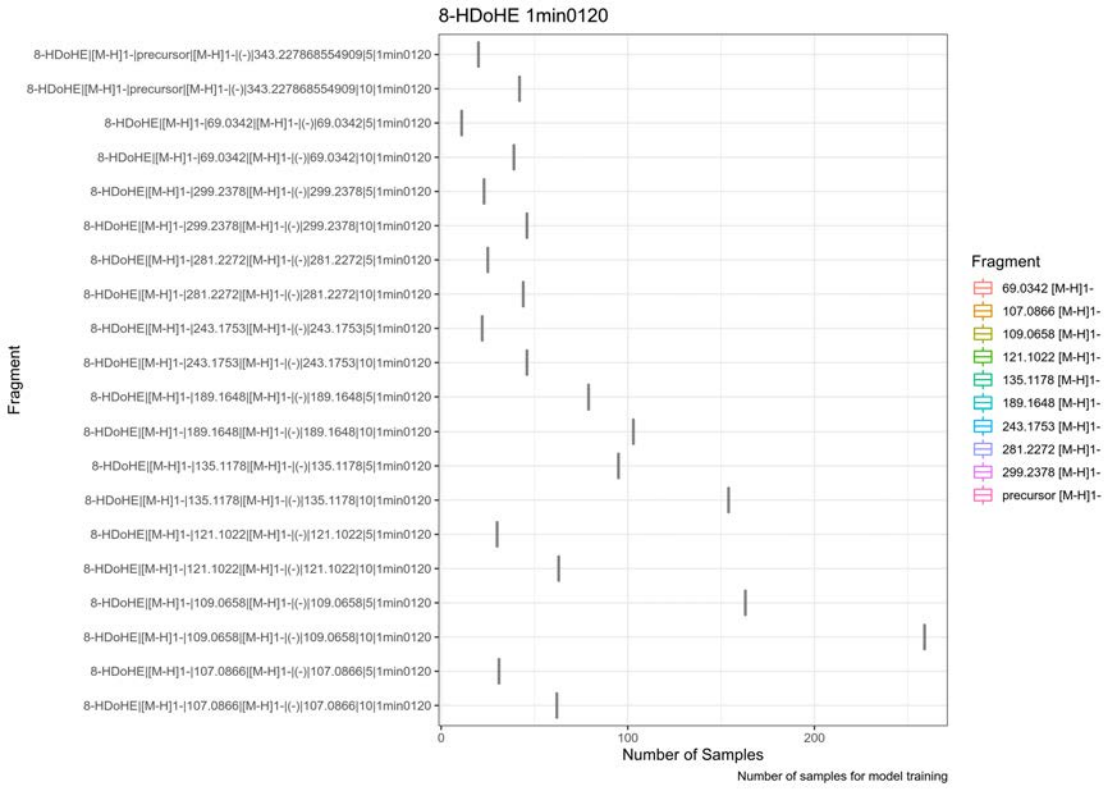

Figure 140. Number of samples used for training per combination Id

# 1.29. 8-HETE [M-H]1- 1min0122

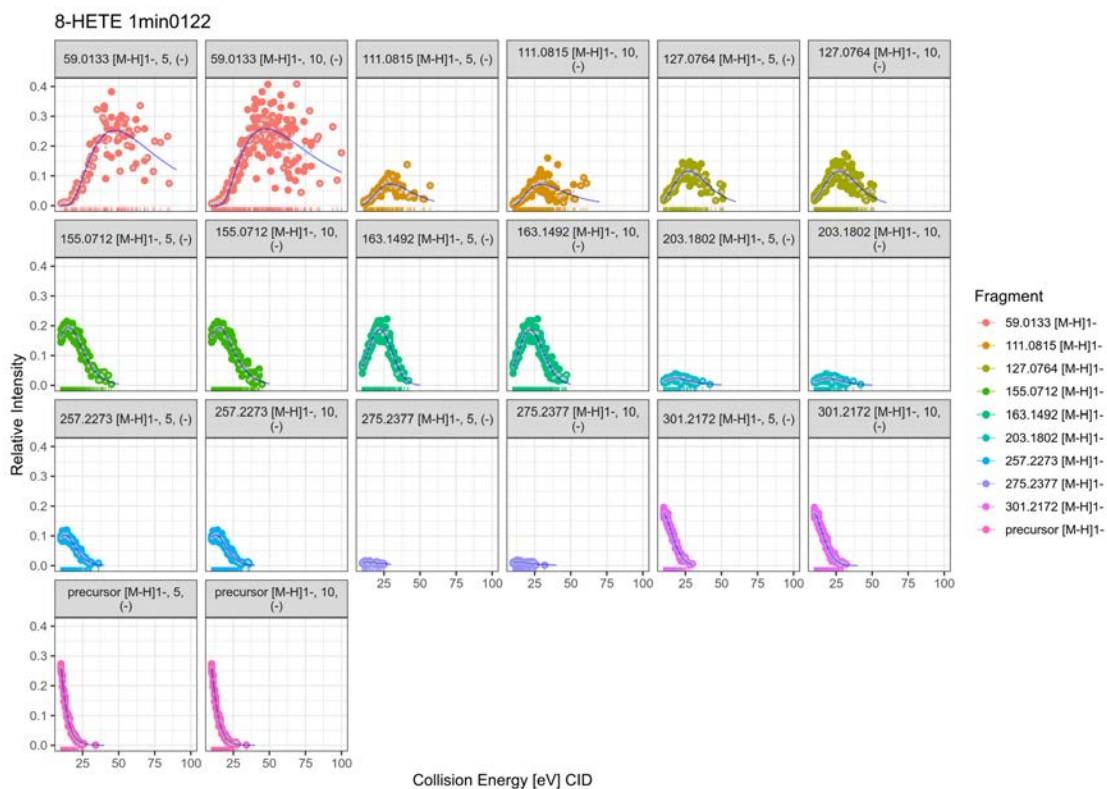

Figure 141. Nonlinear fit

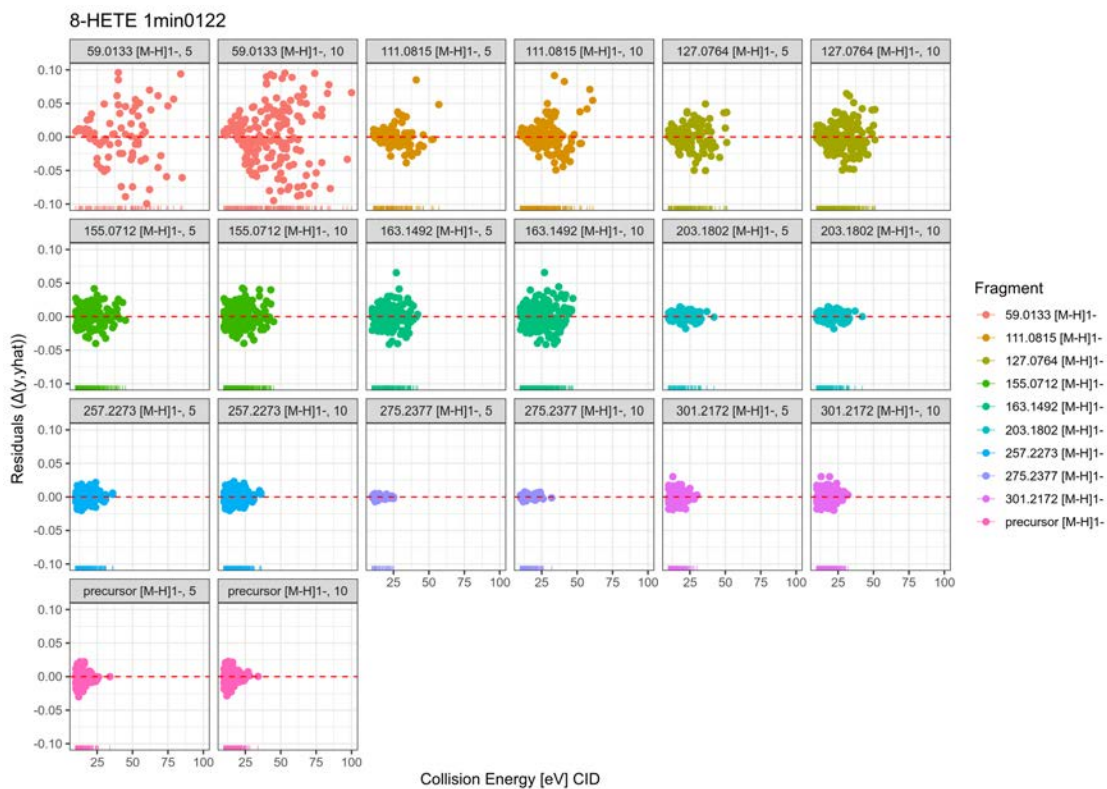

Figure 142. Residuals of nonlinear fit



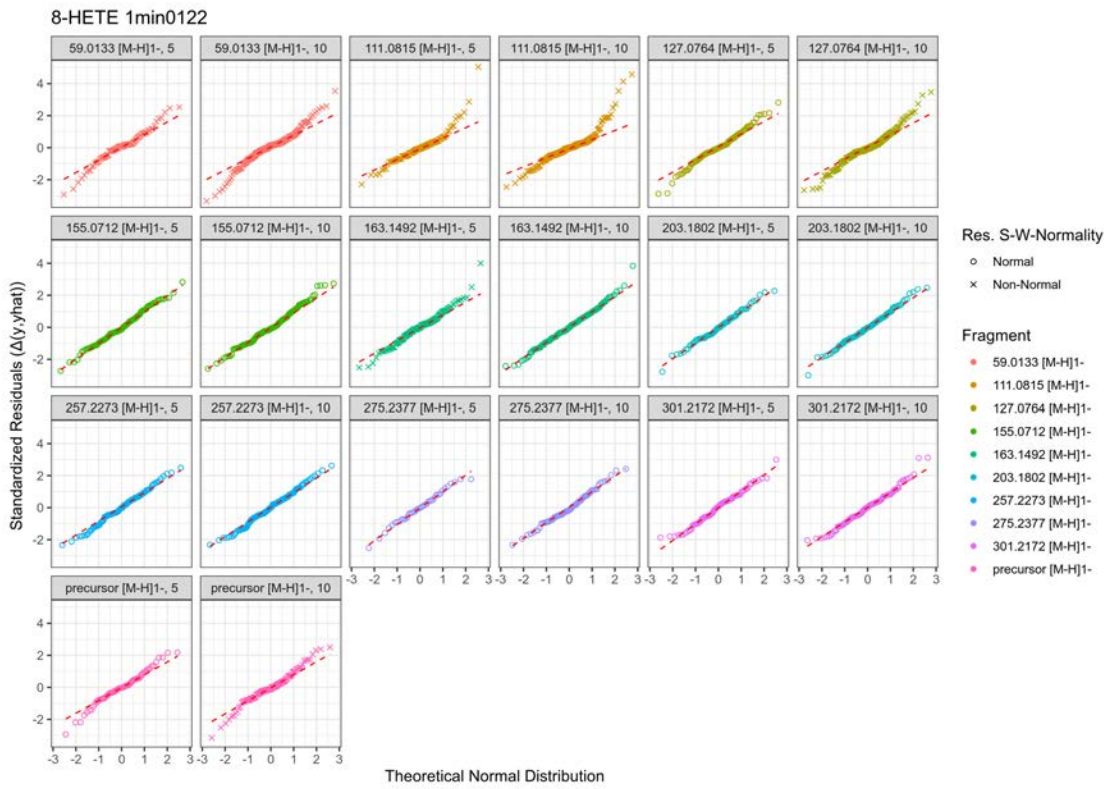

Figure 143. Quantile-quantile plot of residuals

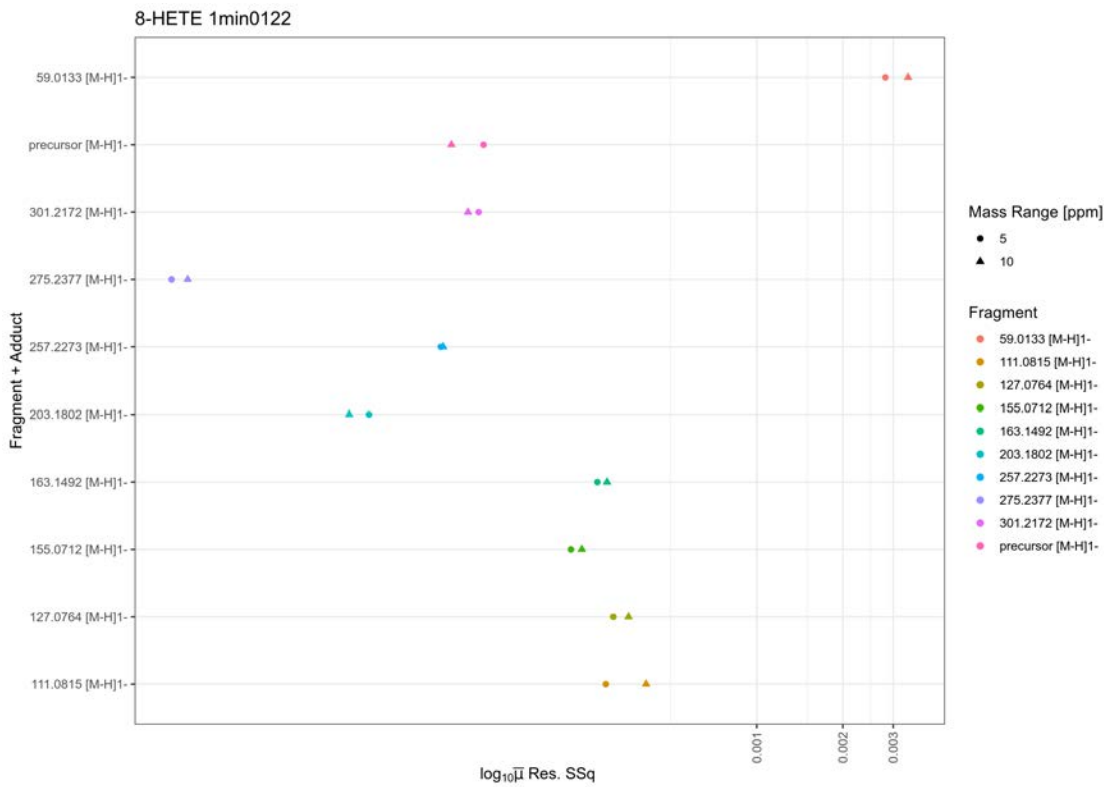

Figure 144. Normalized sum-of-squares of the residuals



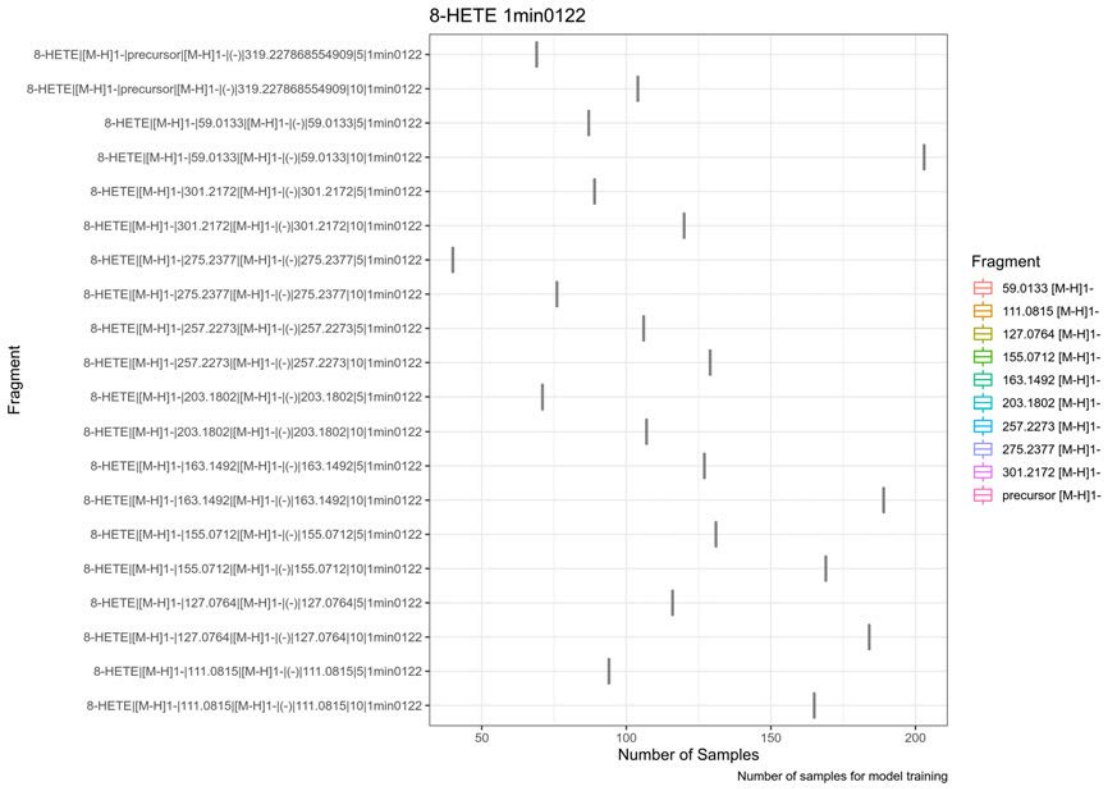

Figure 145. Number of samples used for training per combination Id

# 1.30. 9(10)-EpOME{d4} [M-H]1- 1min0124

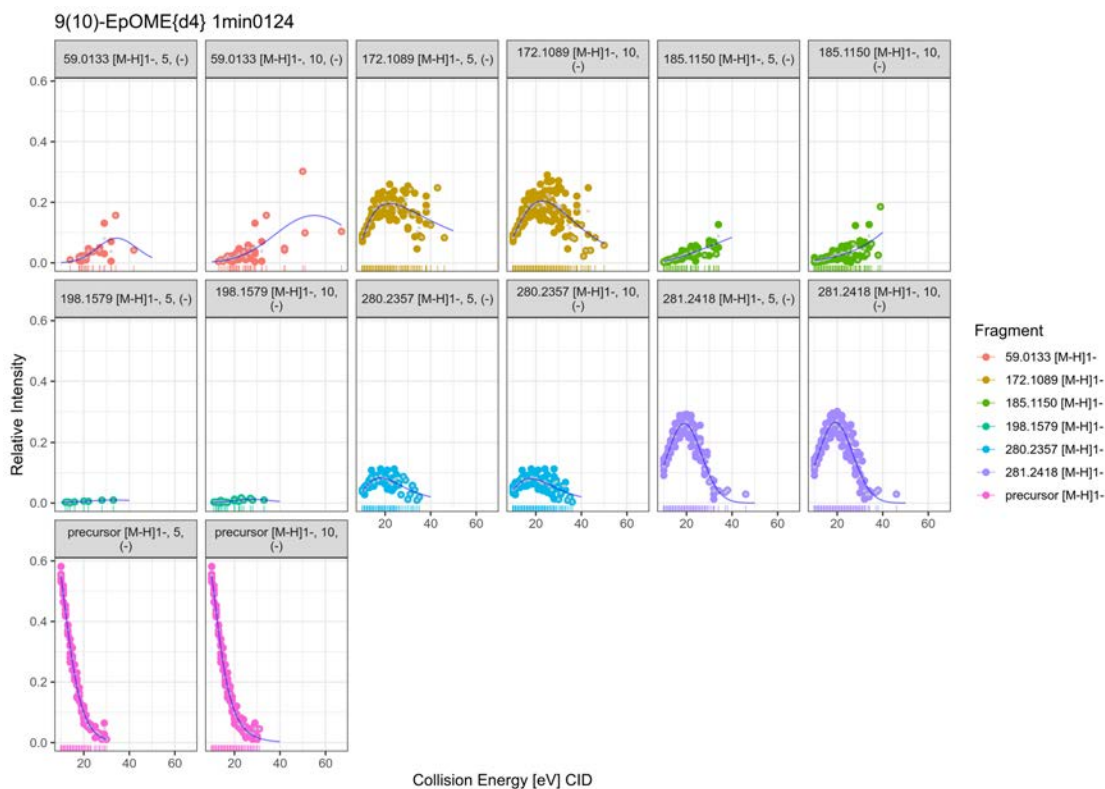

Figure 146. Nonlinear fit

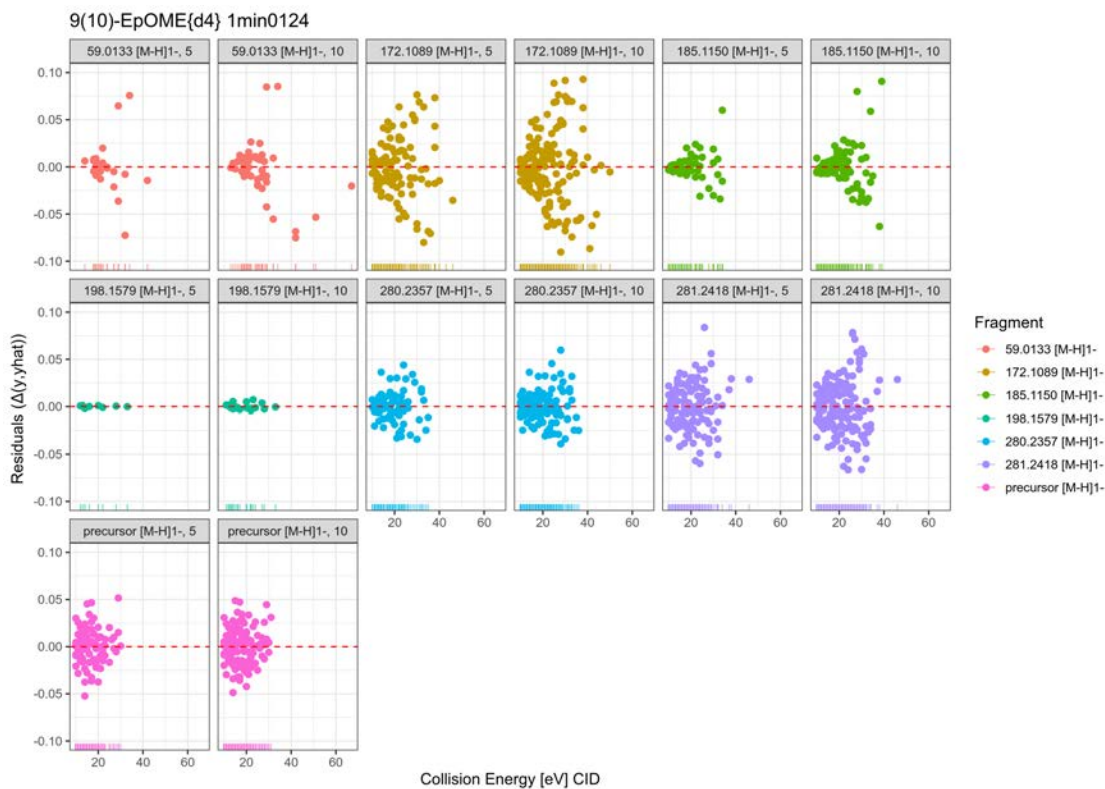

Figure 147. Residuals of nonlinear fit

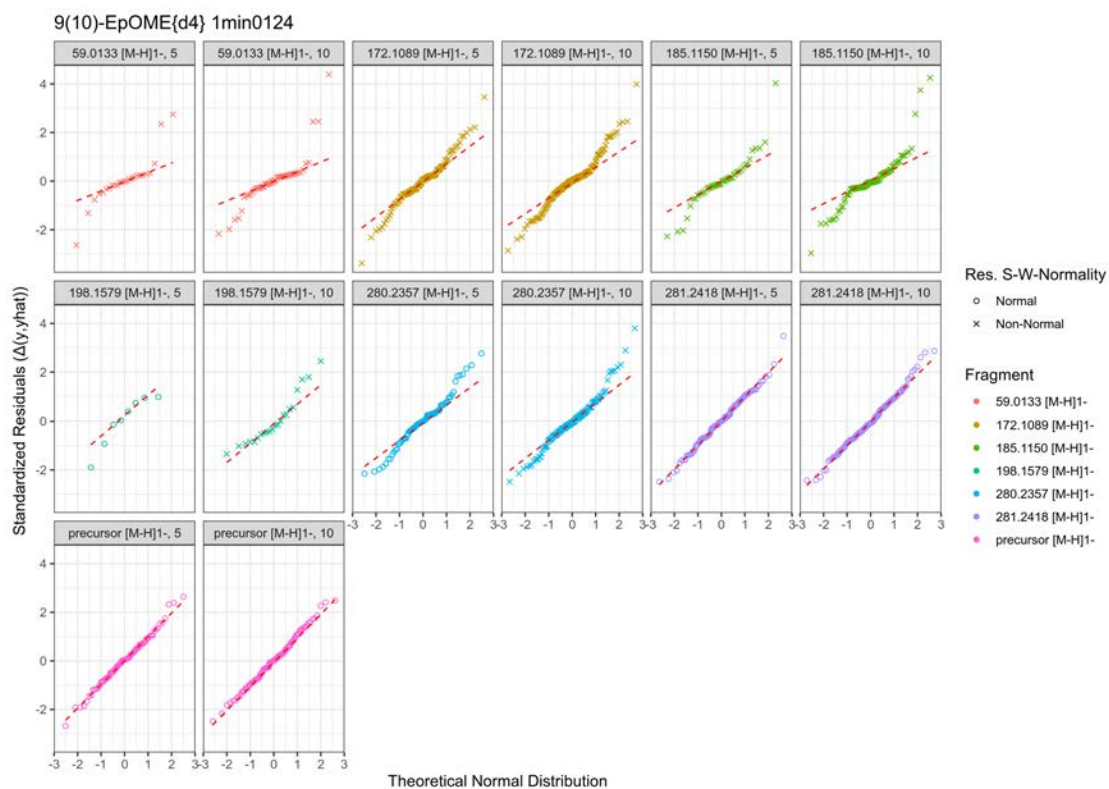

Figure 148. Quantile-quantile plot of residuals

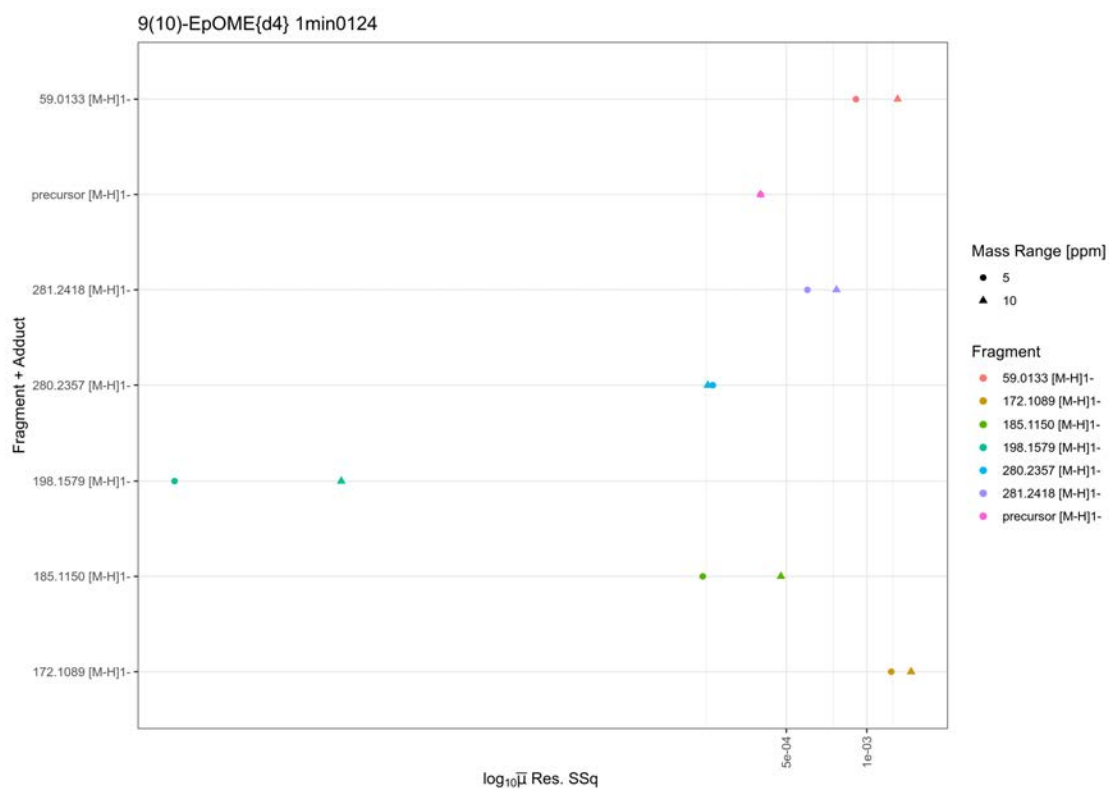

Figure 149. Normalized sum-of-squares of the residuals

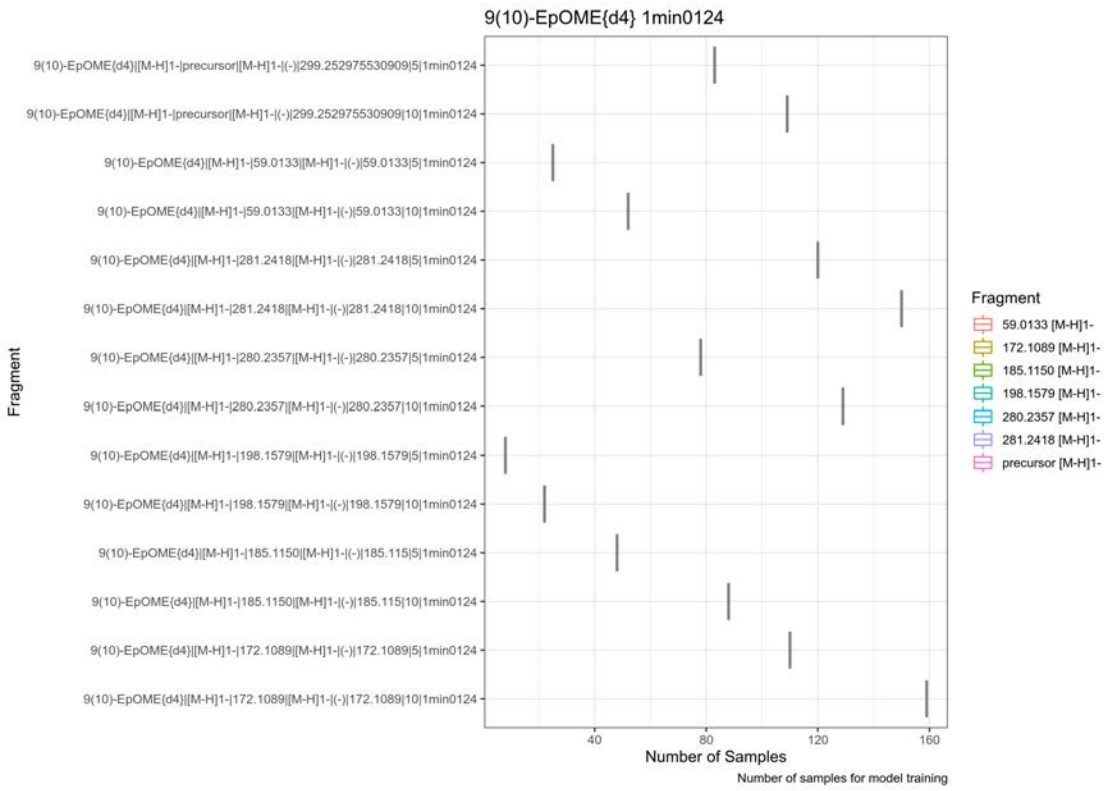

Figure 150. Number of samples used for training per combination Id

# 1.31. 9-HEPE [M-H]1- 1min0128

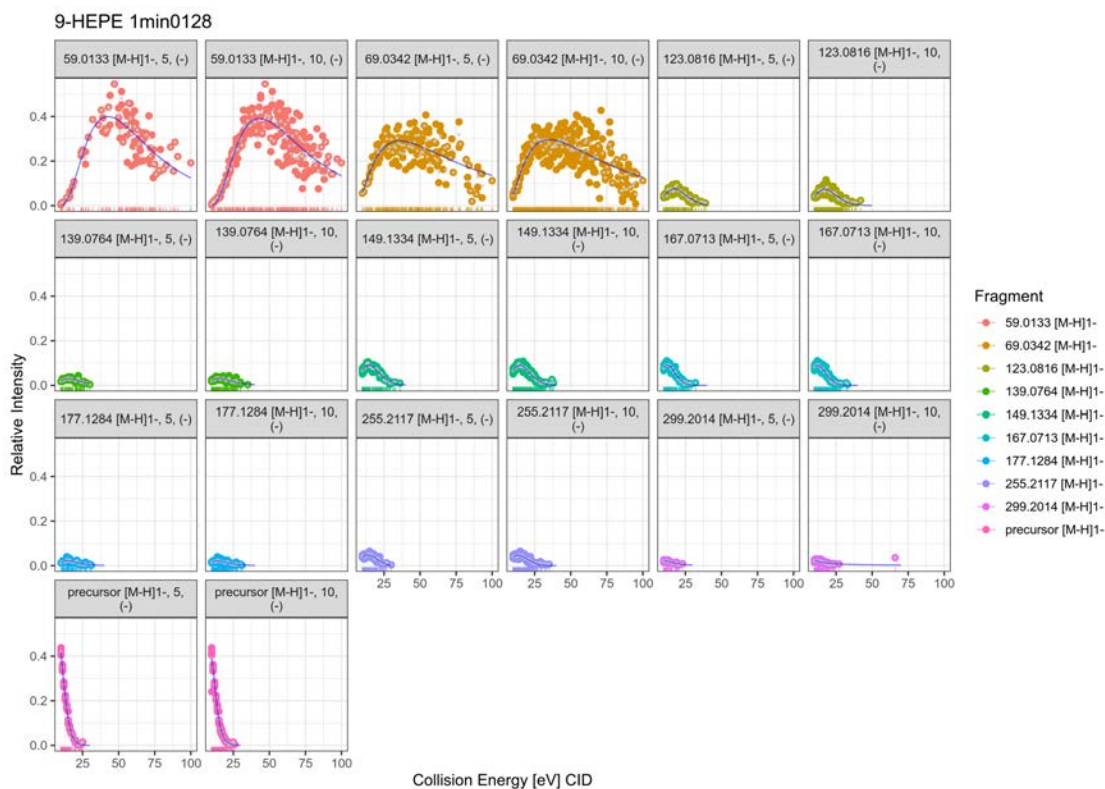

Figure 151. Nonlinear fit

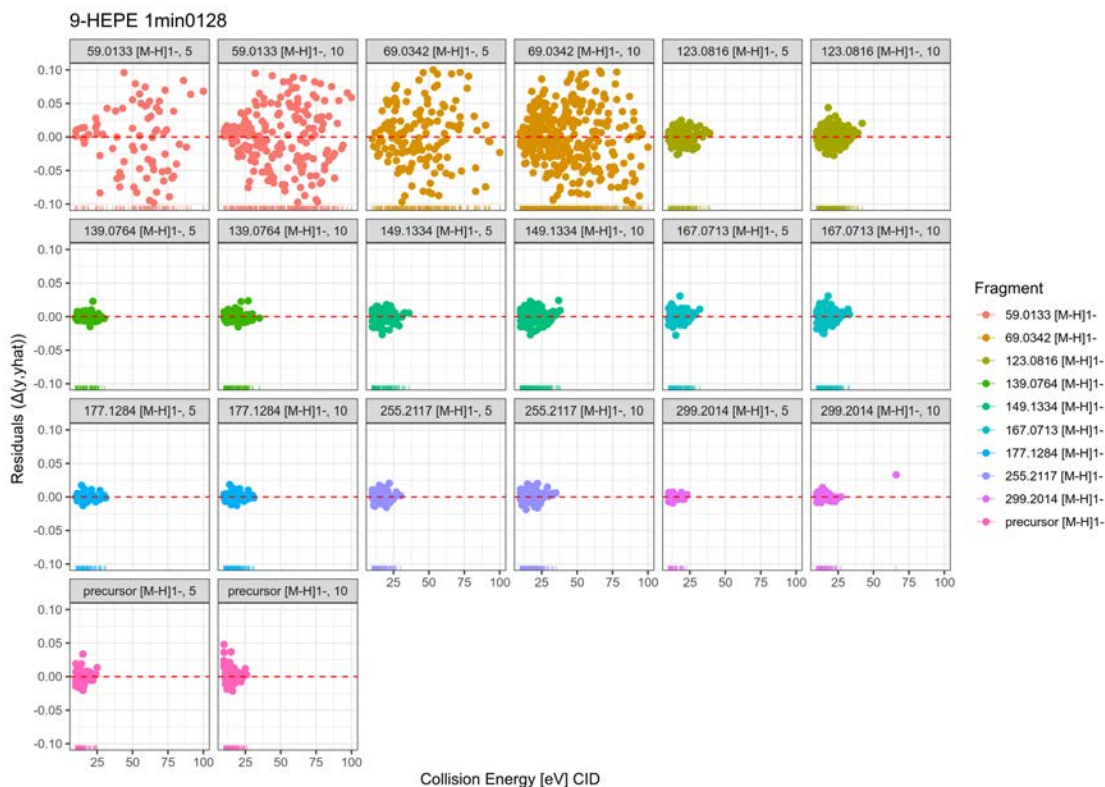

Figure 152. Residuals of nonlinear fit



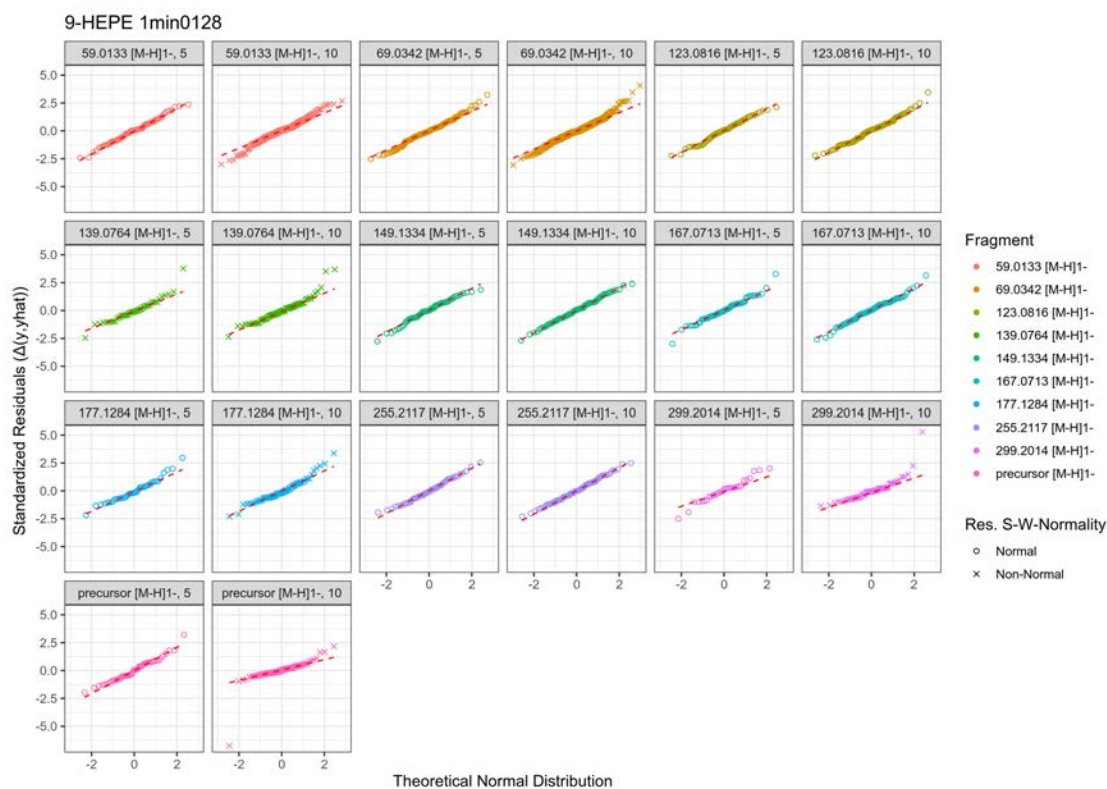

Figure 153. Quantile-quantile plot of residuals

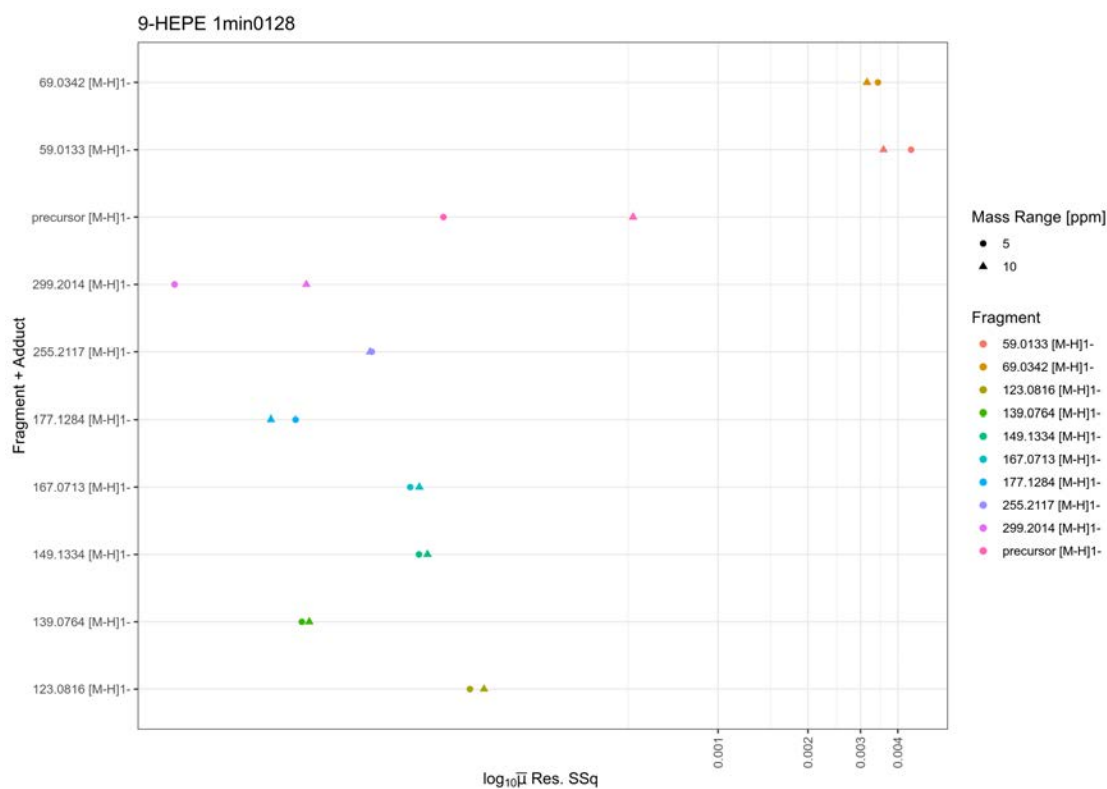

Figure 154. Normalized sum-of-squares of the residuals

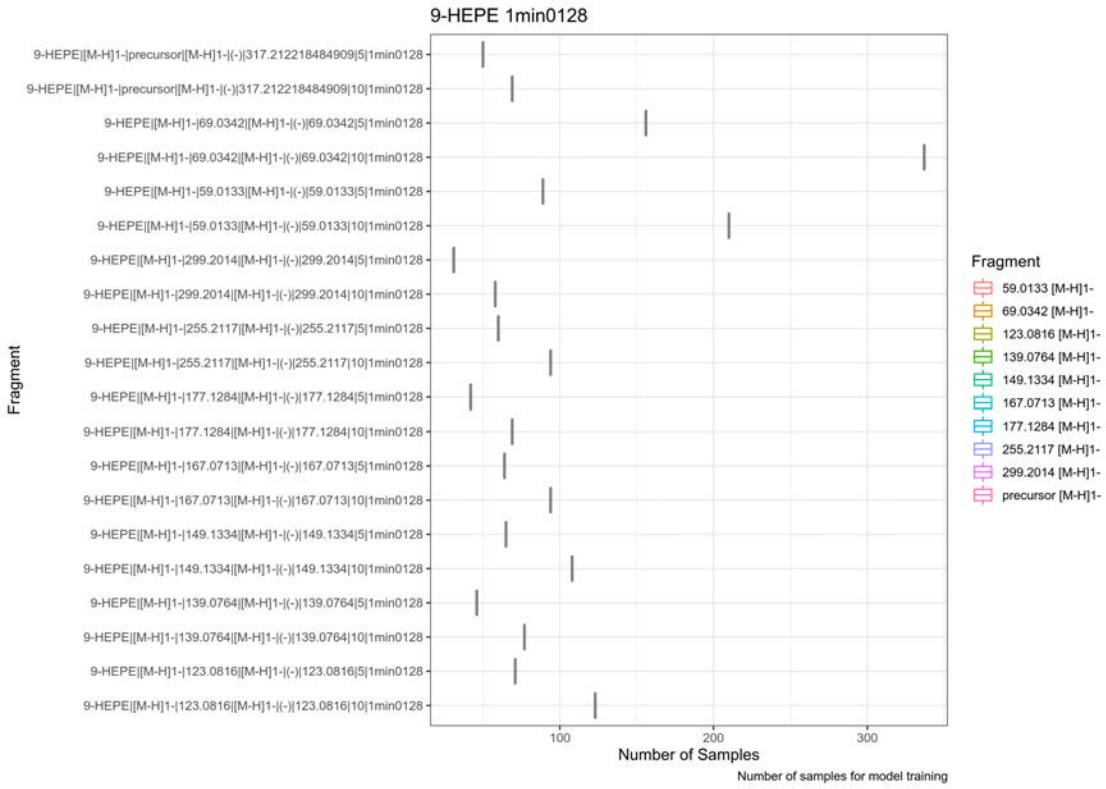

Figure 155. Number of samples used for training per combination Id

# 1.32. 9-HETE [M-H]1- 1min0130

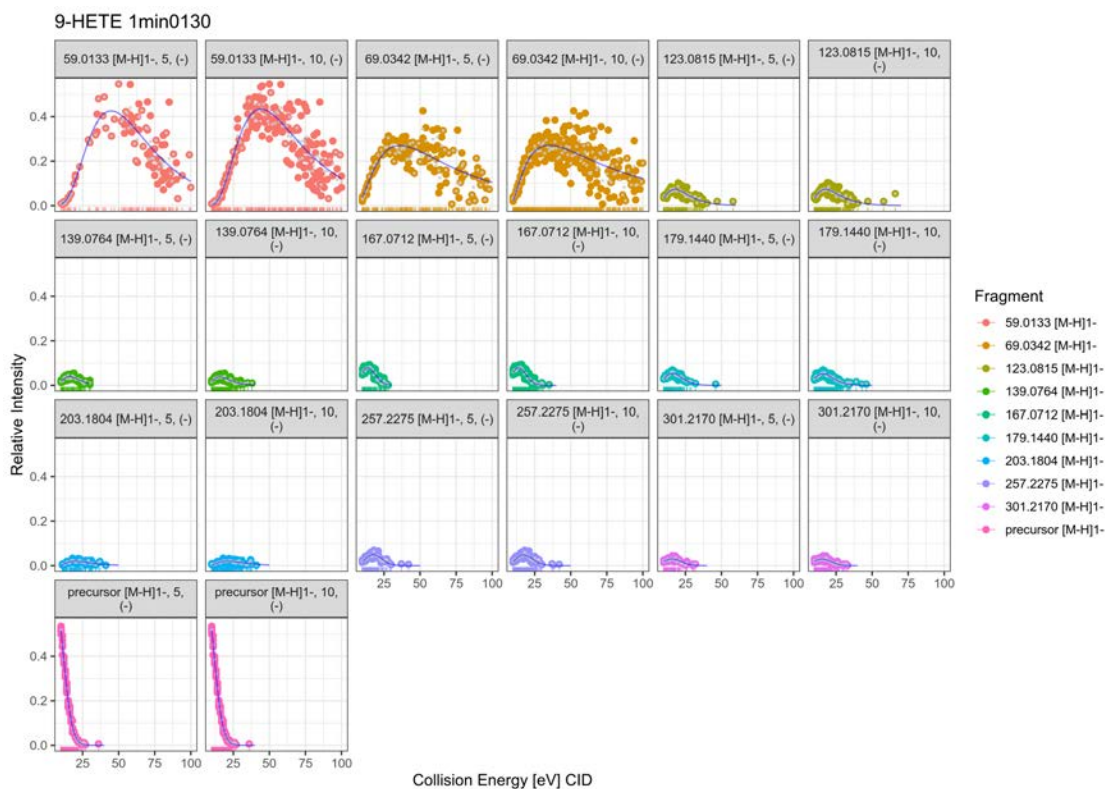

Figure 156. Nonlinear fit

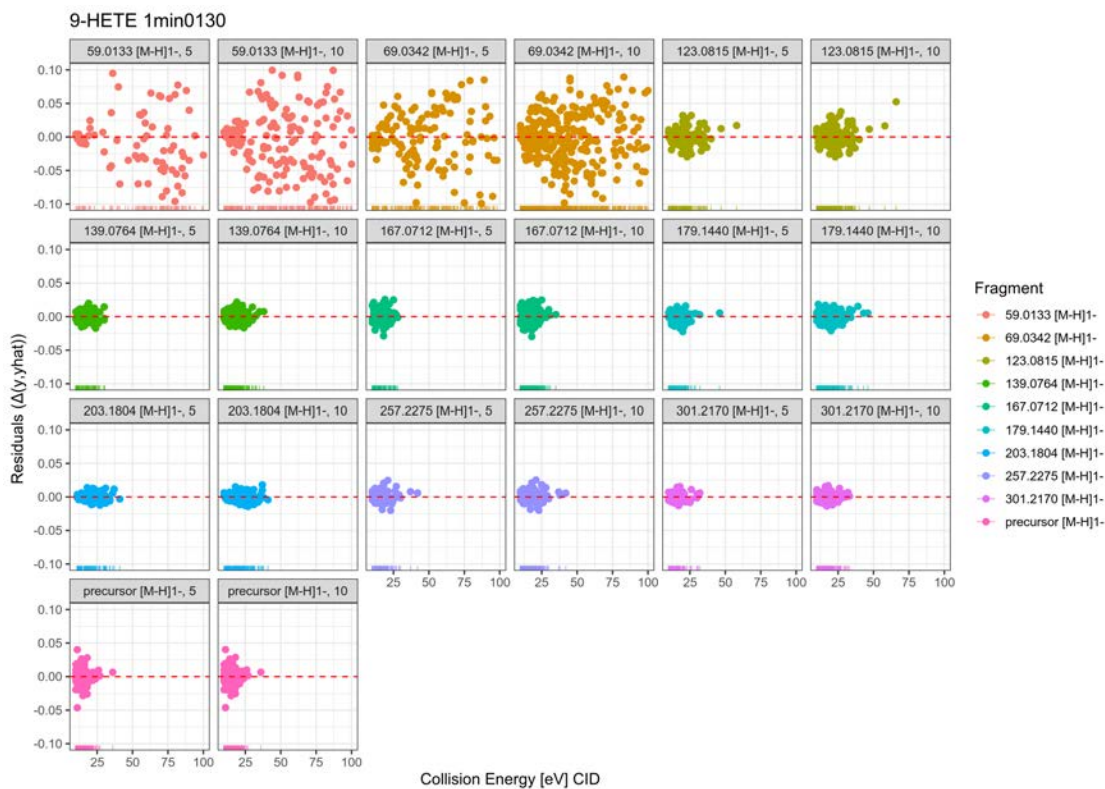

Figure 157. Residuals of nonlinear fit

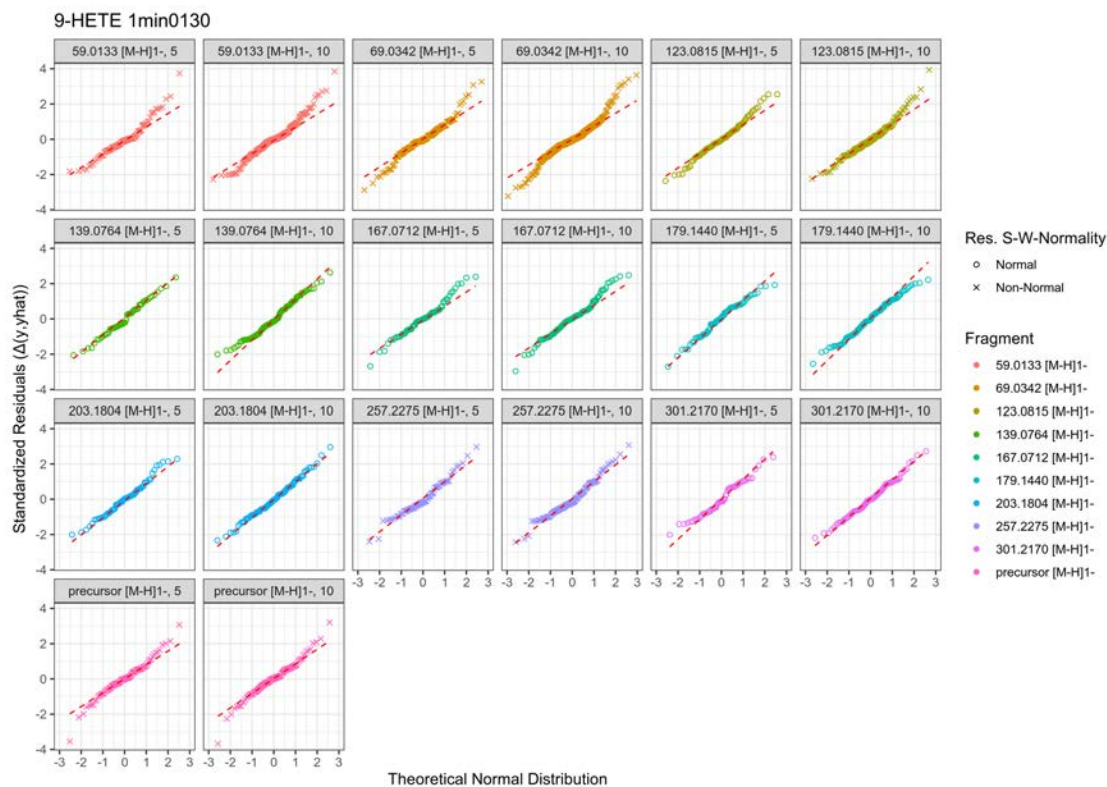

Figure 158. Quantile-quantile plot of residuals

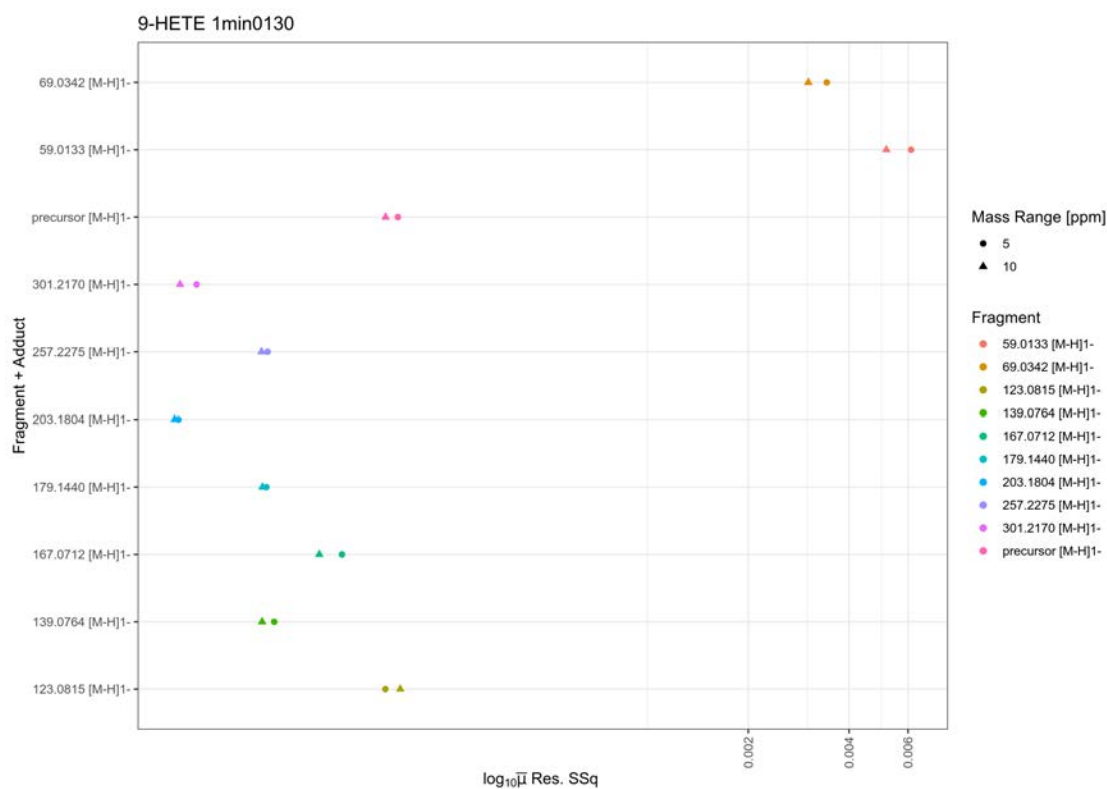

Figure 159. Normalized sum-of-squares of the residuals

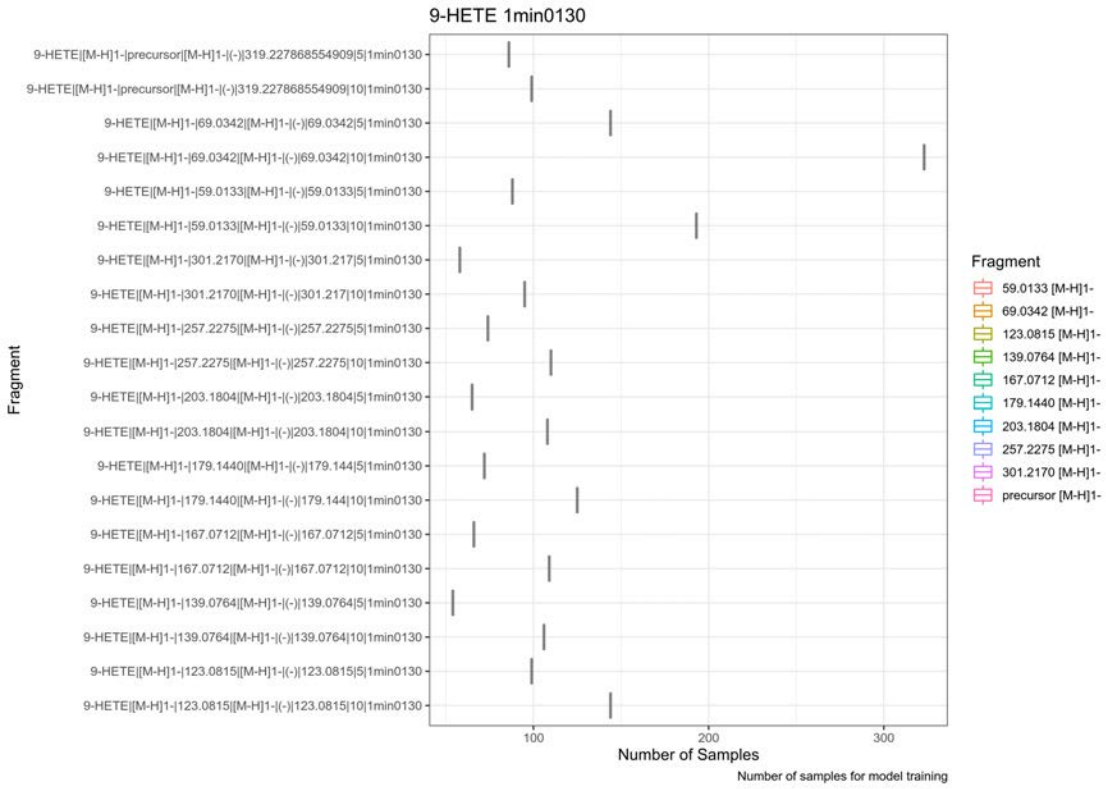

Figure 160. Number of samples used for training per combination Id



### 1.33. 9-HODE [M-H]1- 1min0132

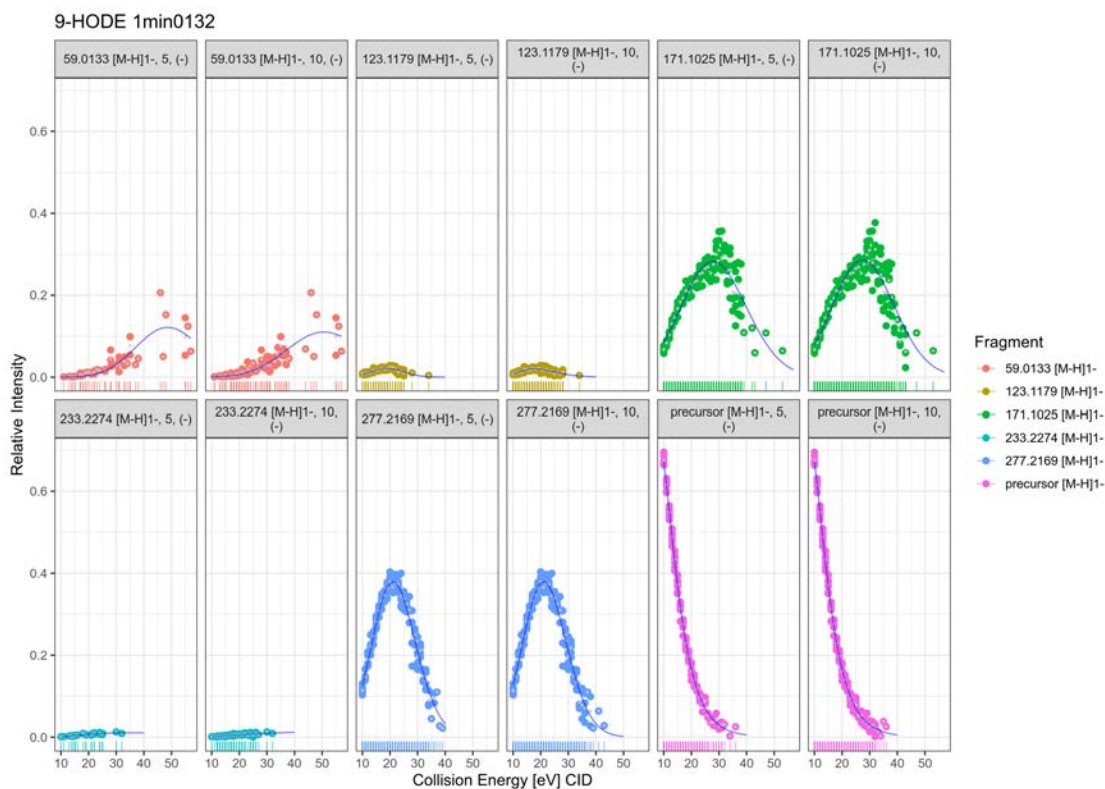

Figure 161. Nonlinear fit

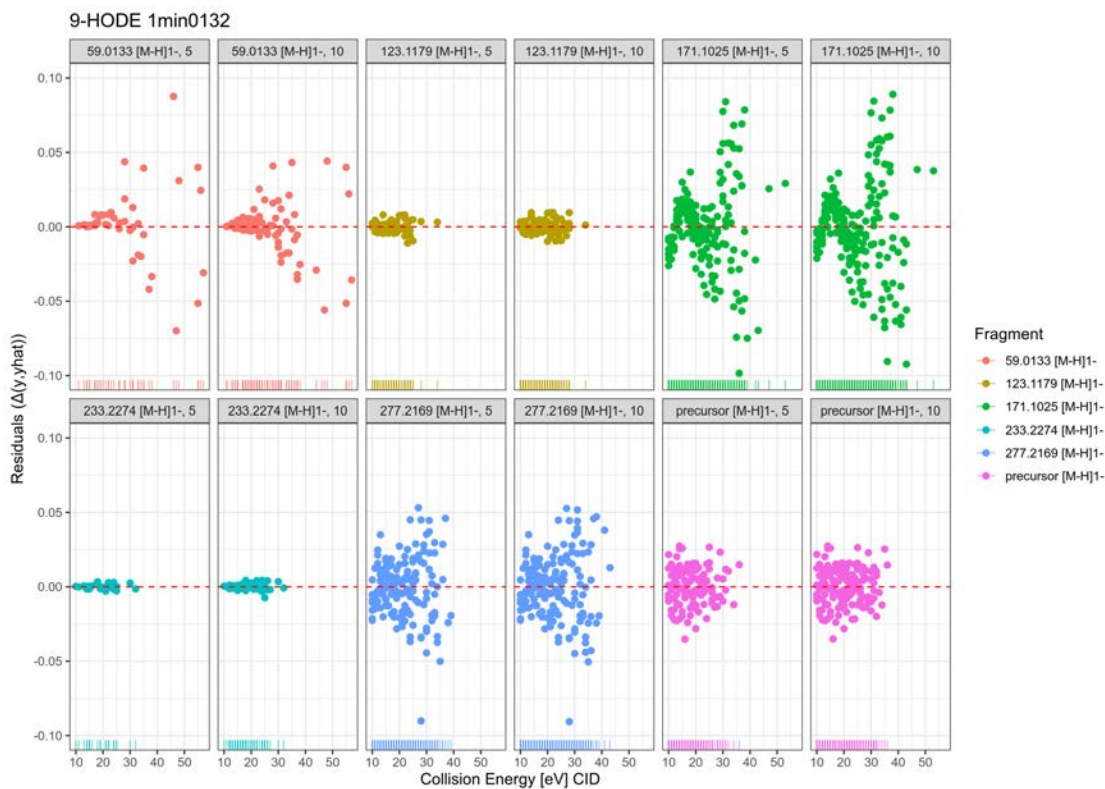

Figure 162. Residuals of nonlinear fit

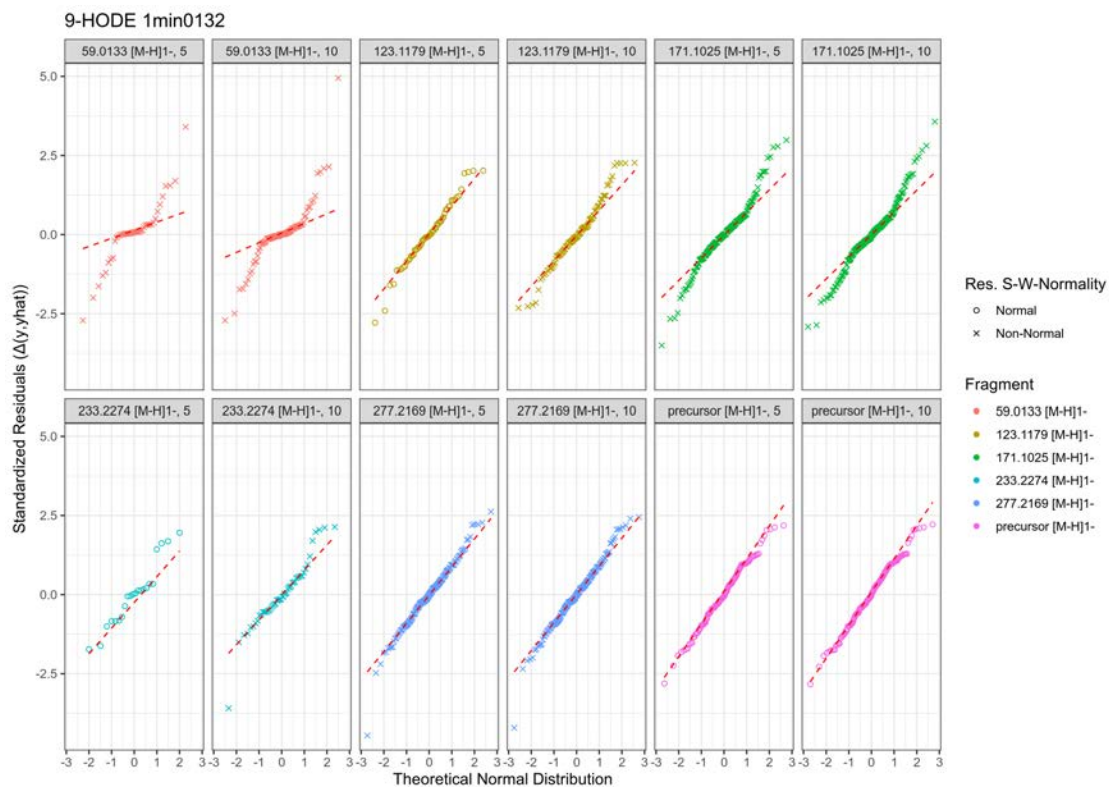

Figure 163. Quantile-quantile plot of residuals

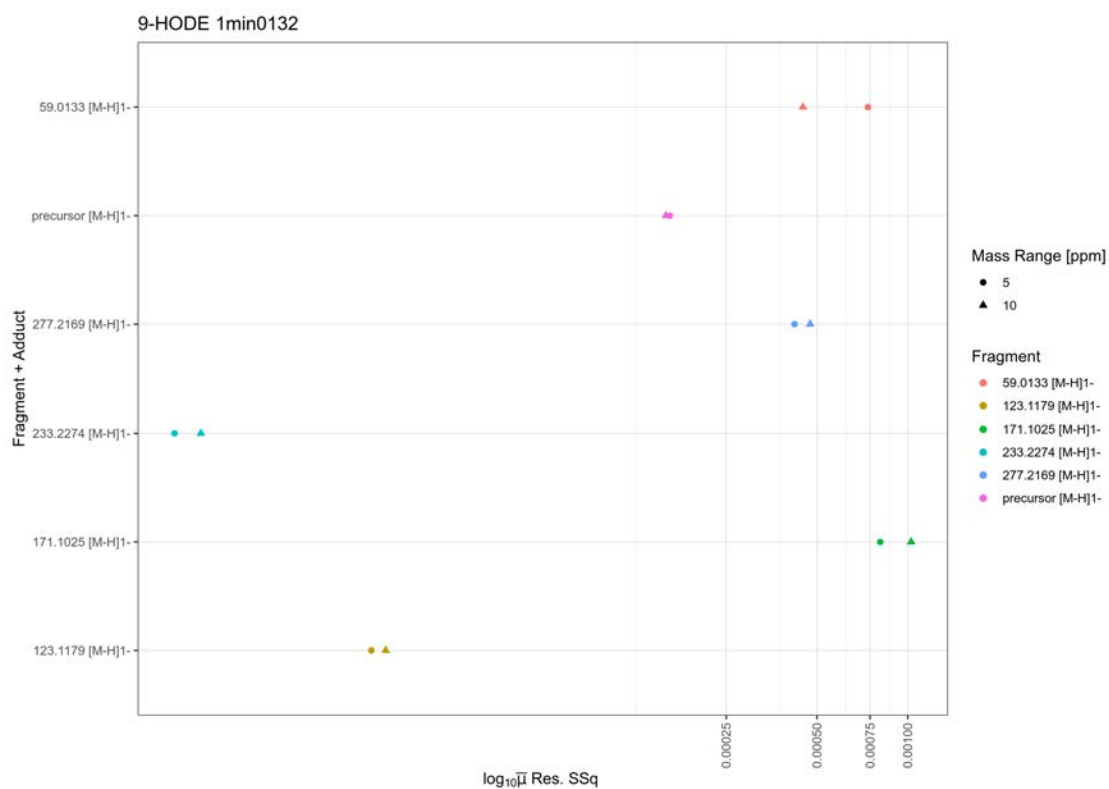

Figure 164. Normalized sum-of-squares of the residuals

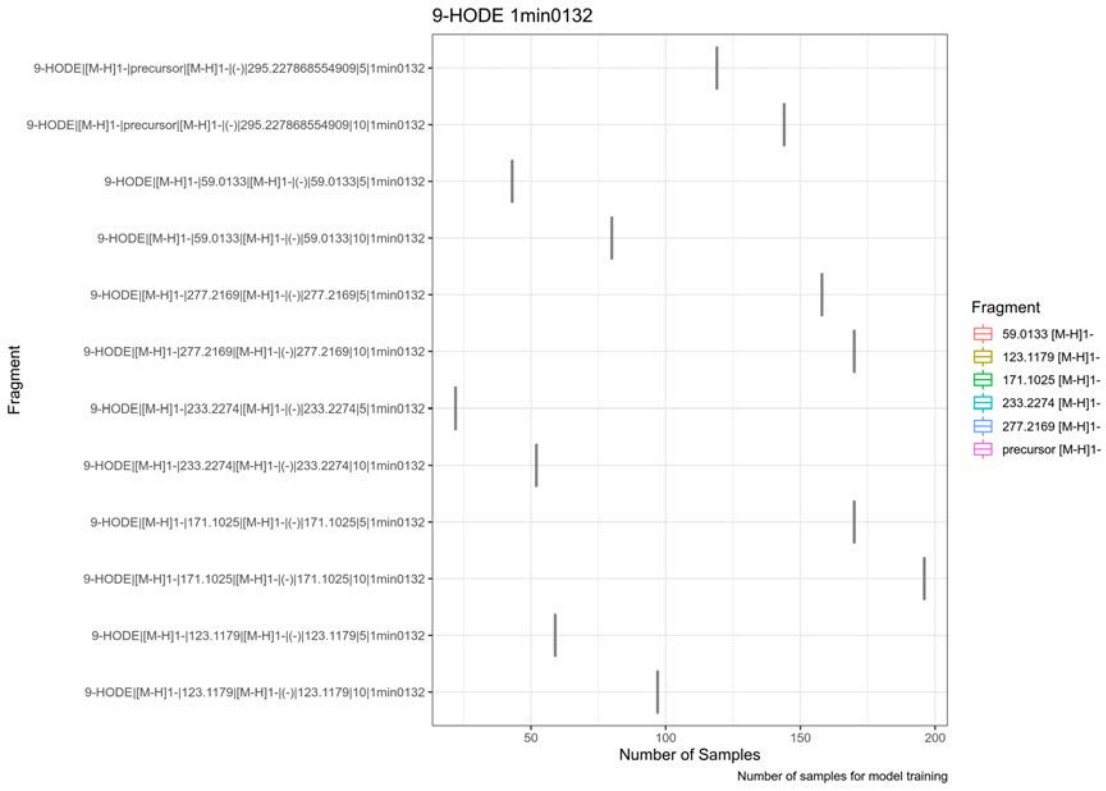

Figure 165. Number of samples used for training per combination Id

# 1.34. 9-HOTrE [M-H]1- 1min0205

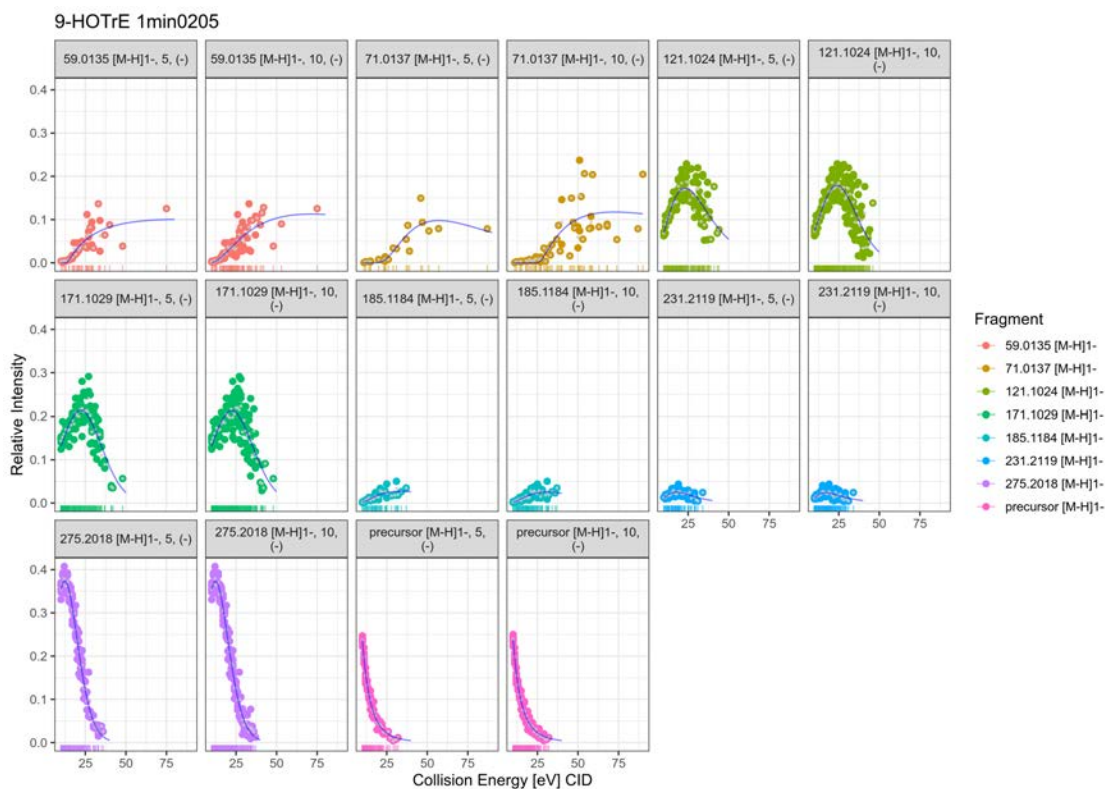

Figure 166. Nonlinear fit

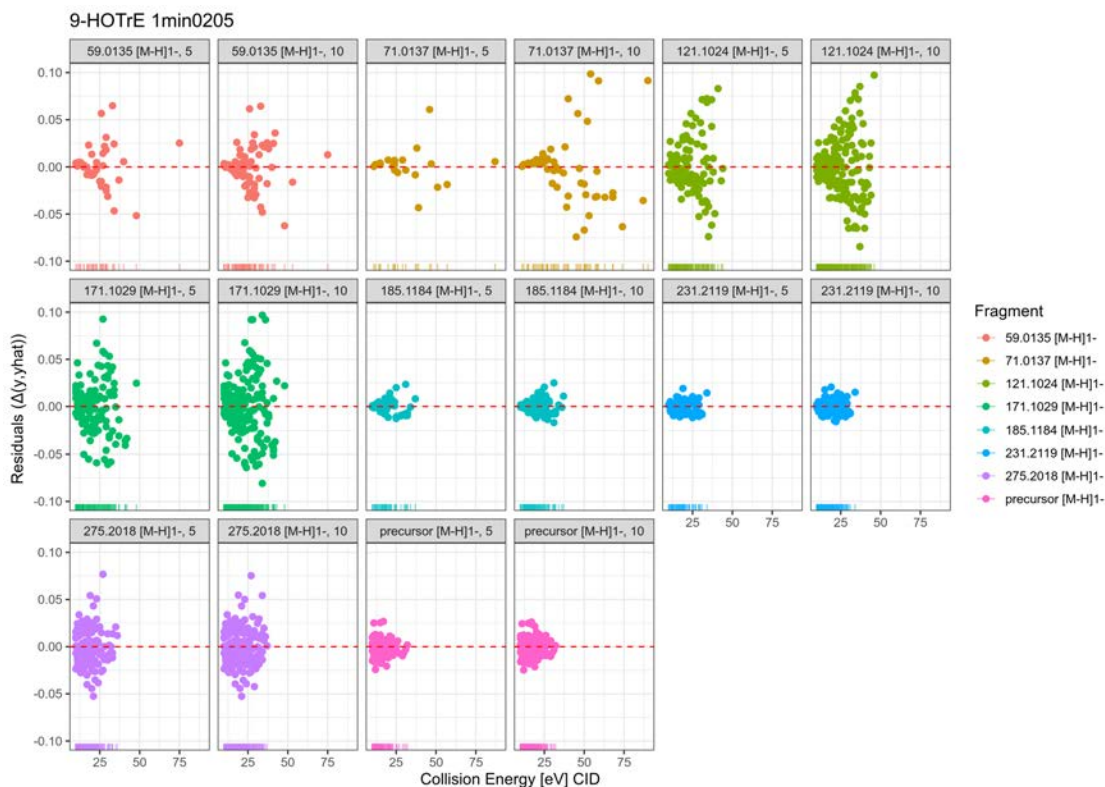

Figure 167. Residuals of nonlinear fit

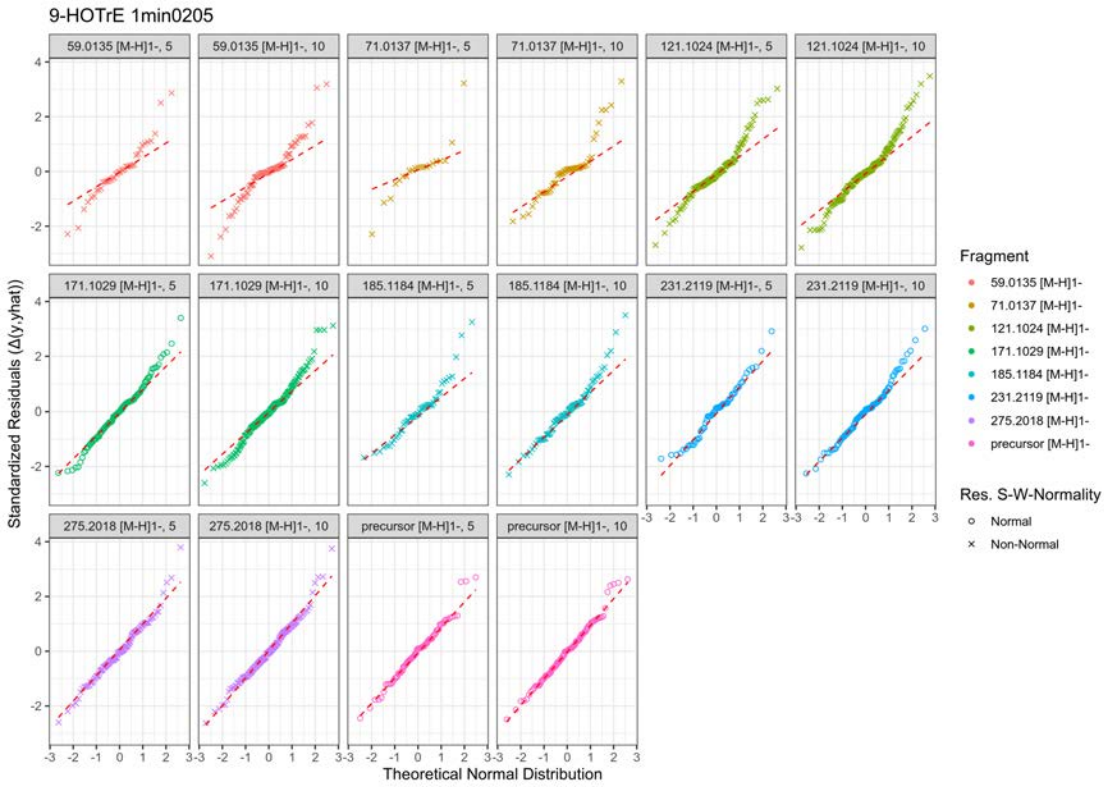

Figure 168. Quantile-quantile plot of residuals

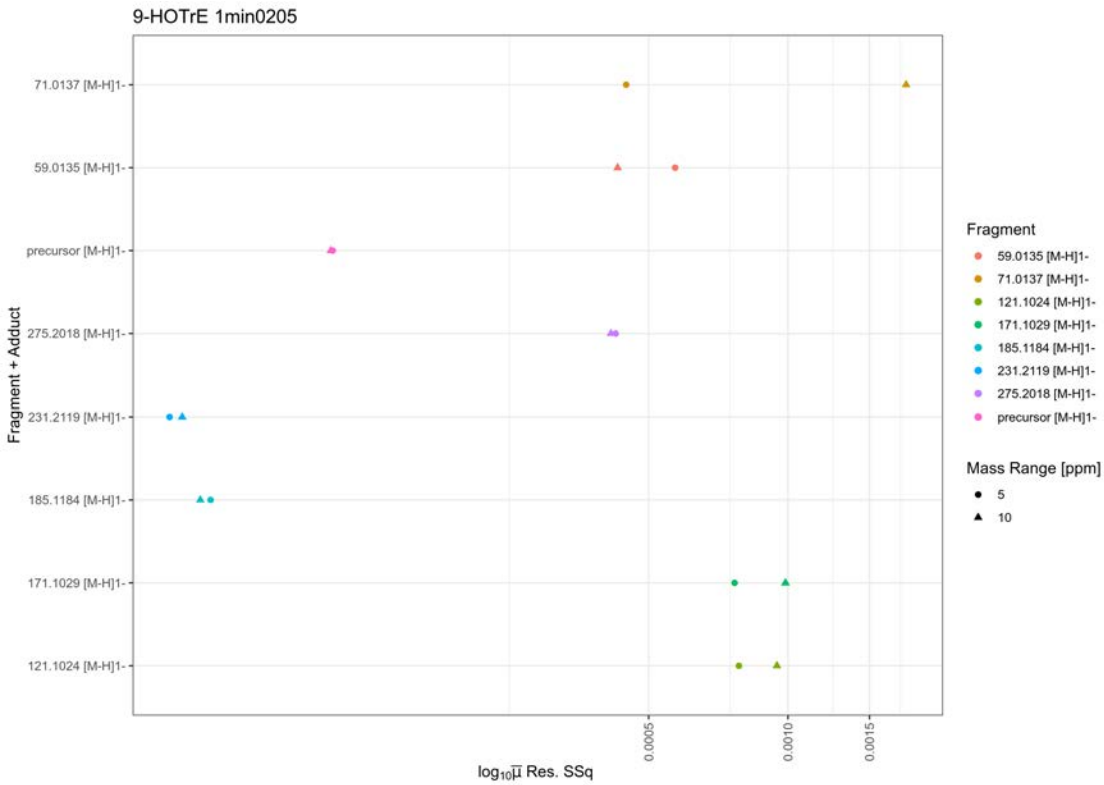

Figure 169. Normalized sum-of-squares of the residuals



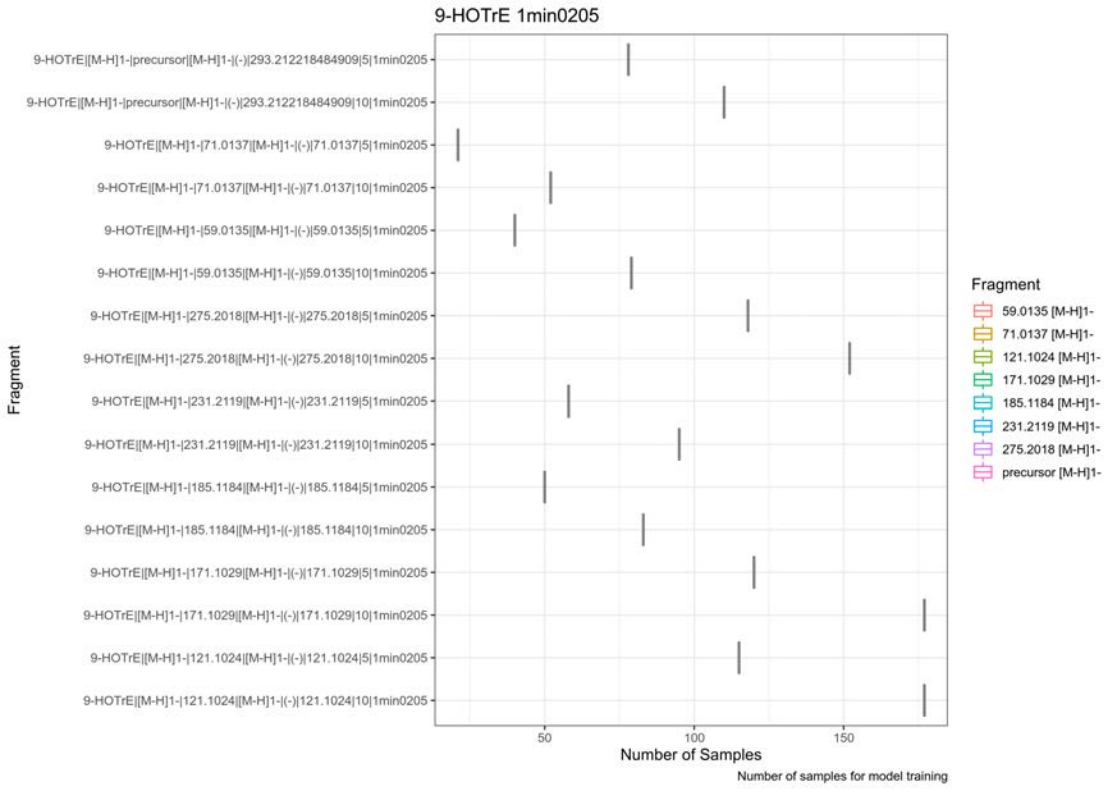

Figure 170. Number of samples used for training per combination Id

# 1.35. AA{d8} [M-H]1- 1min0134

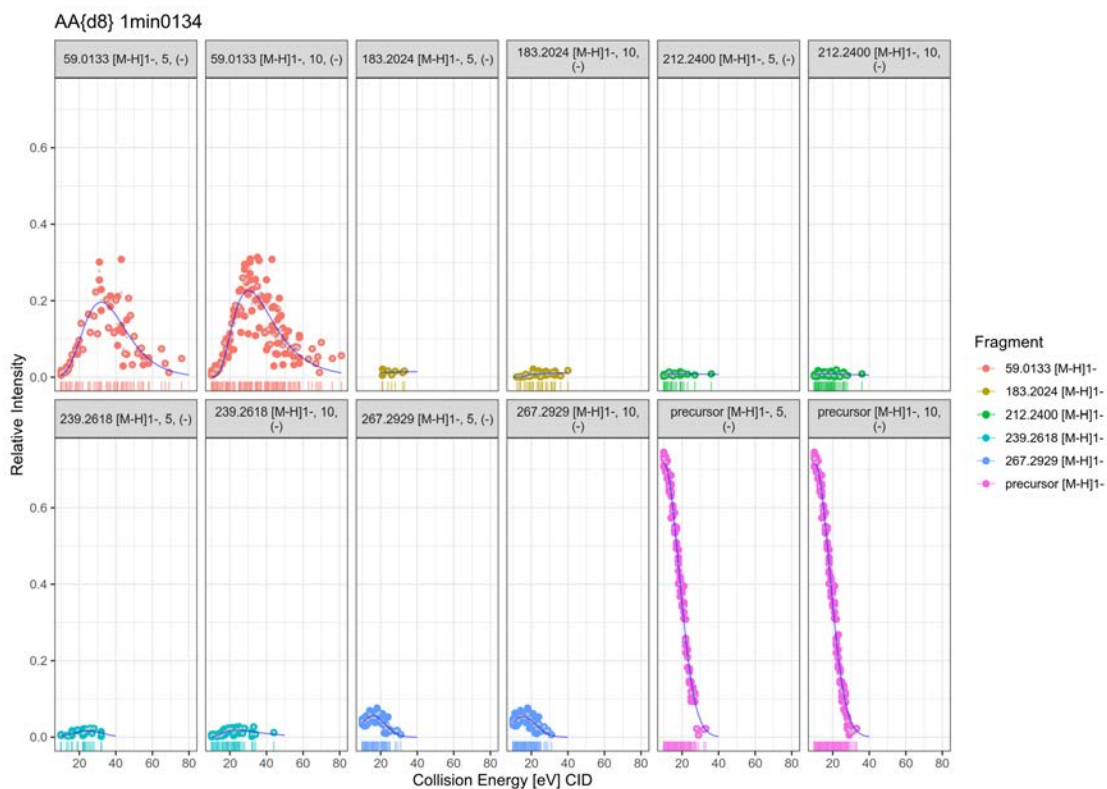

Figure 171. Nonlinear fit

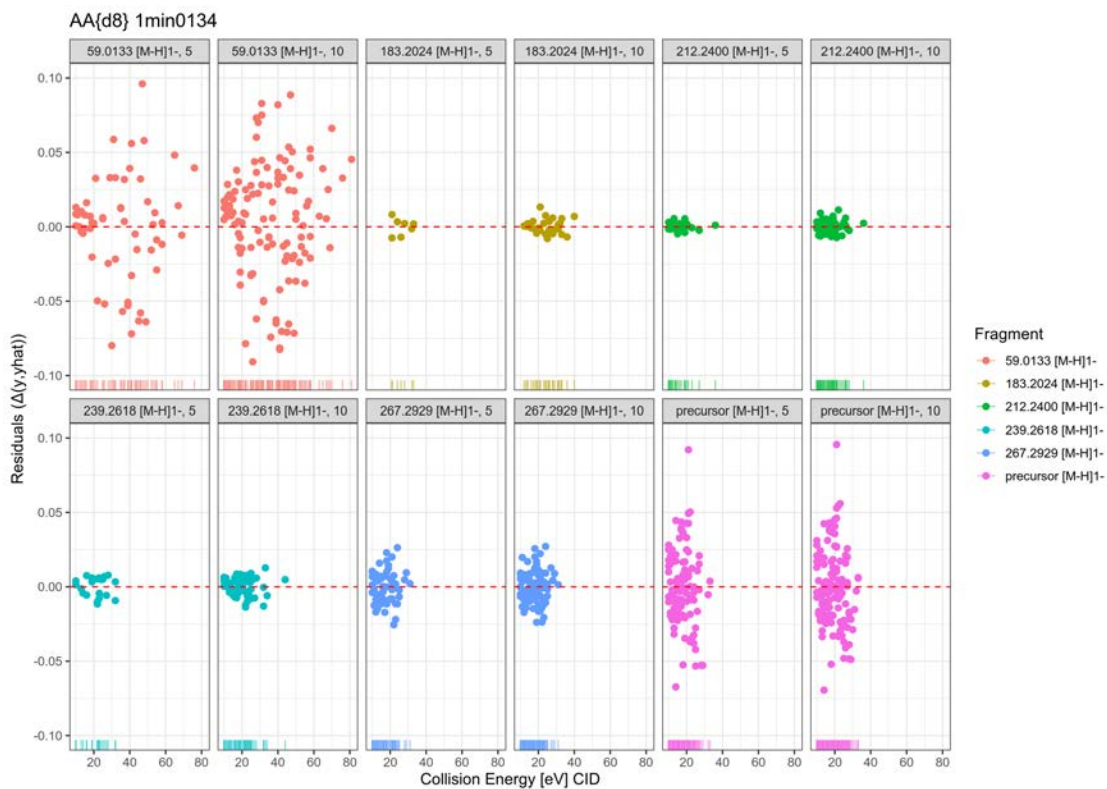

Figure 172. Residuals of nonlinear fit

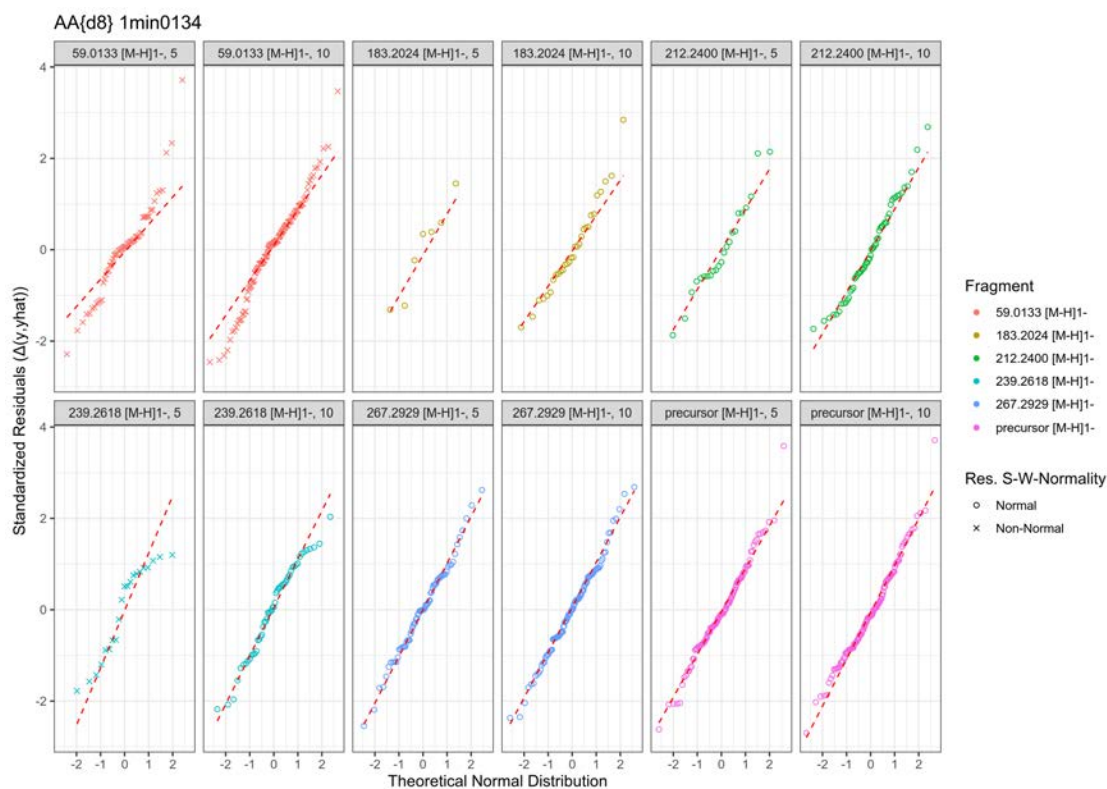

Figure 173. Quantile-quantile plot of residuals

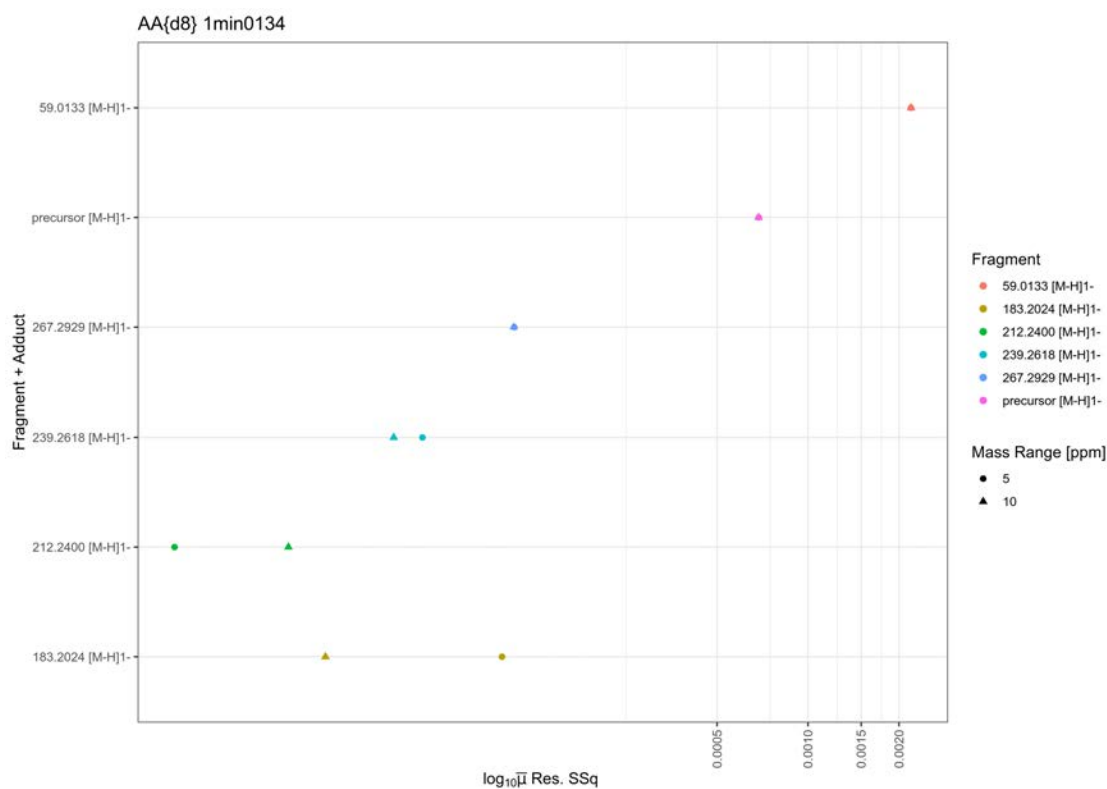

Figure 174. Normalized sum-of-squares of the residuals

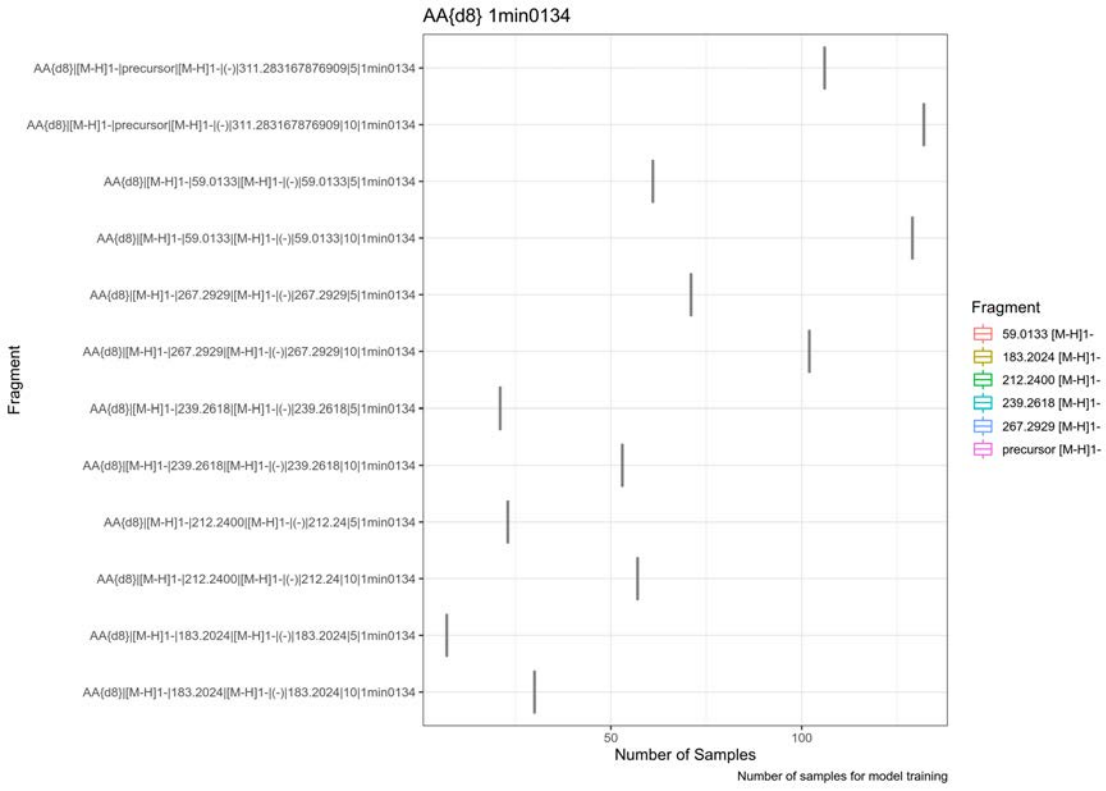

Figure 175. Number of samples used for training per combination Id

# 1.36. DHA{d5} [M-H]1- 1min0137

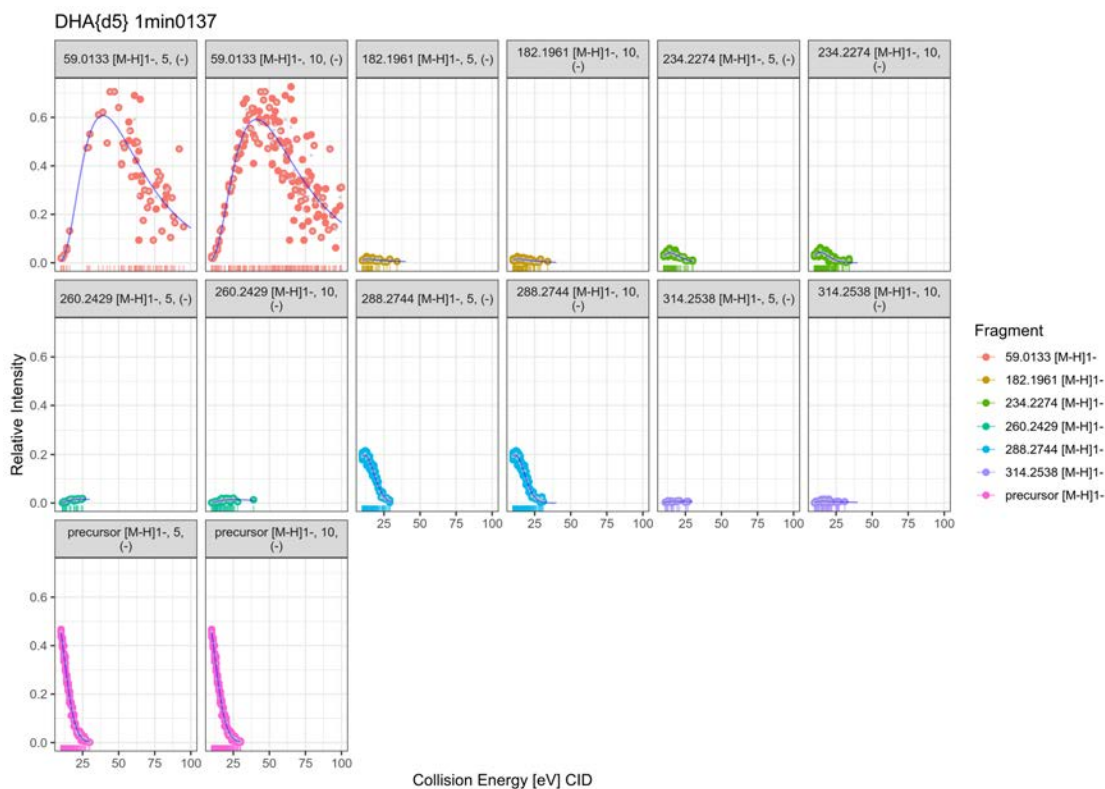

Figure 176. Nonlinear fit

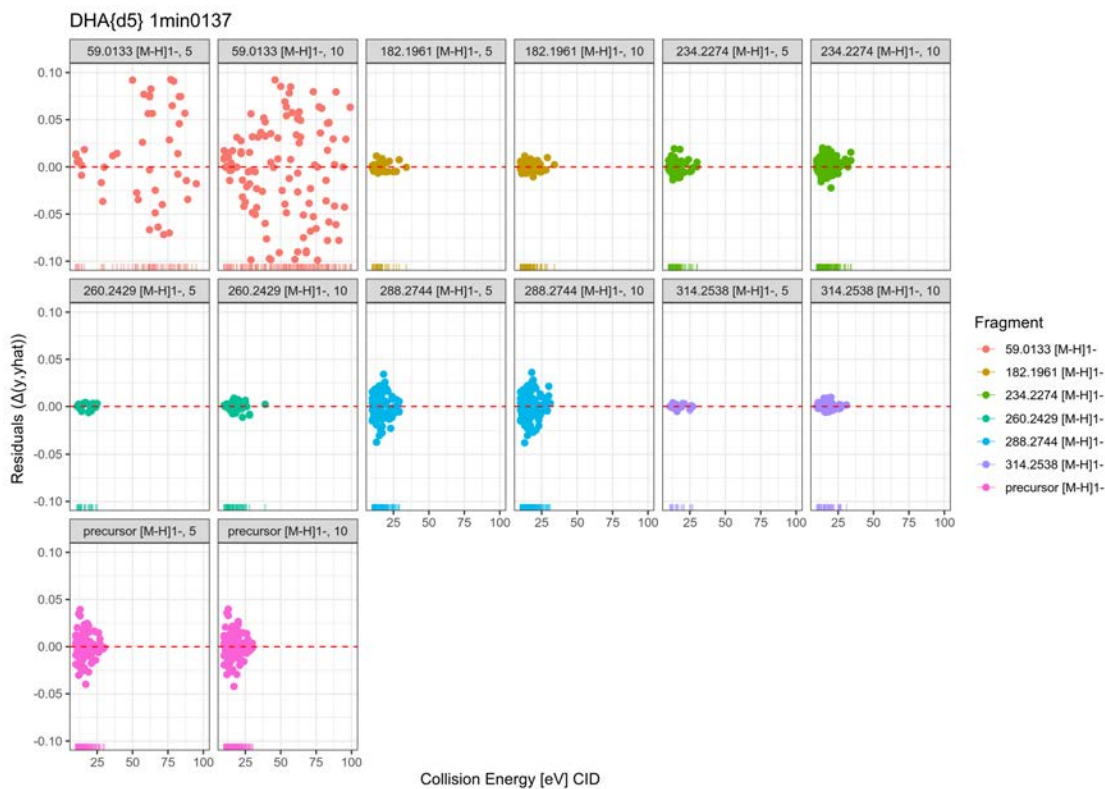

Figure 177. Residuals of nonlinear fit



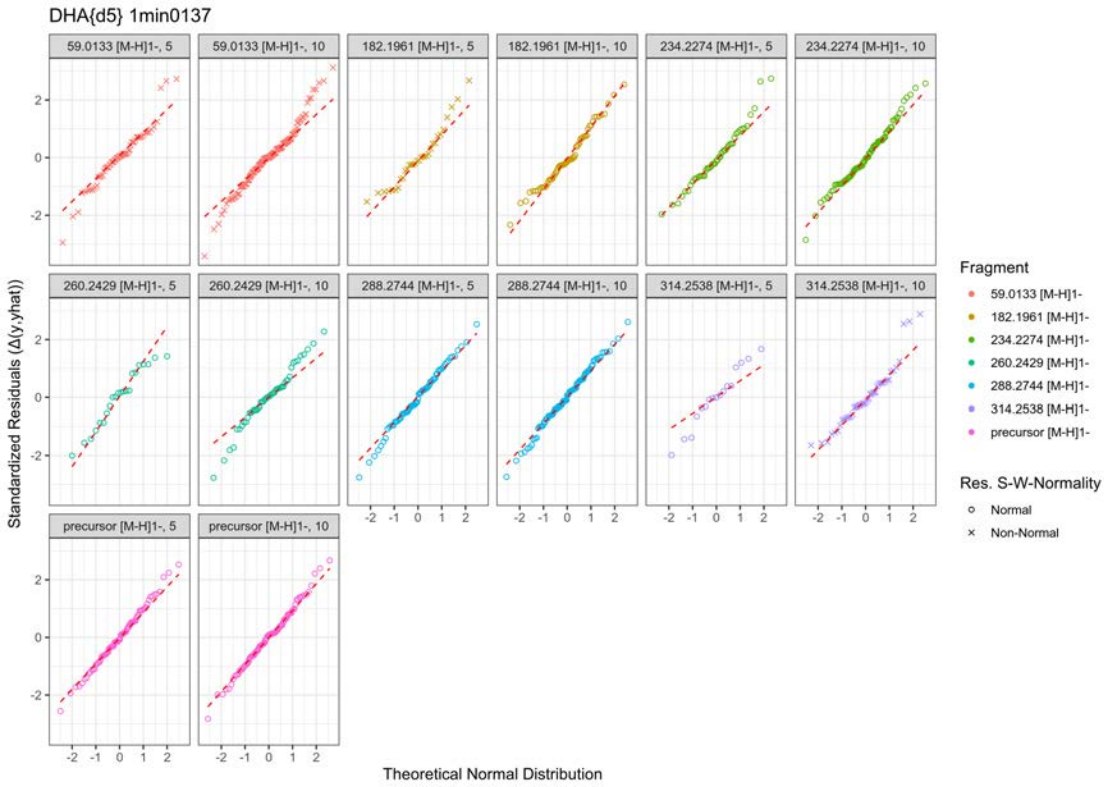

Figure 178. Quantile-quantile plot of residuals

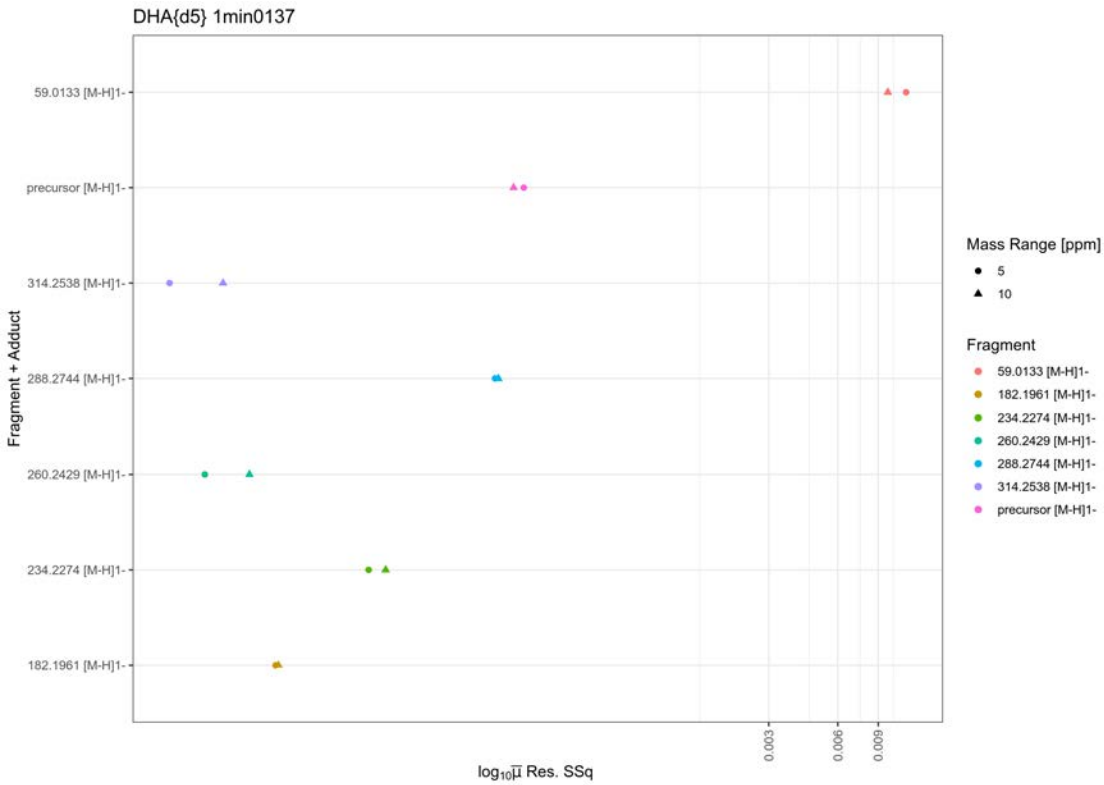

Figure 179. Normalized sum-of-squares of the residuals

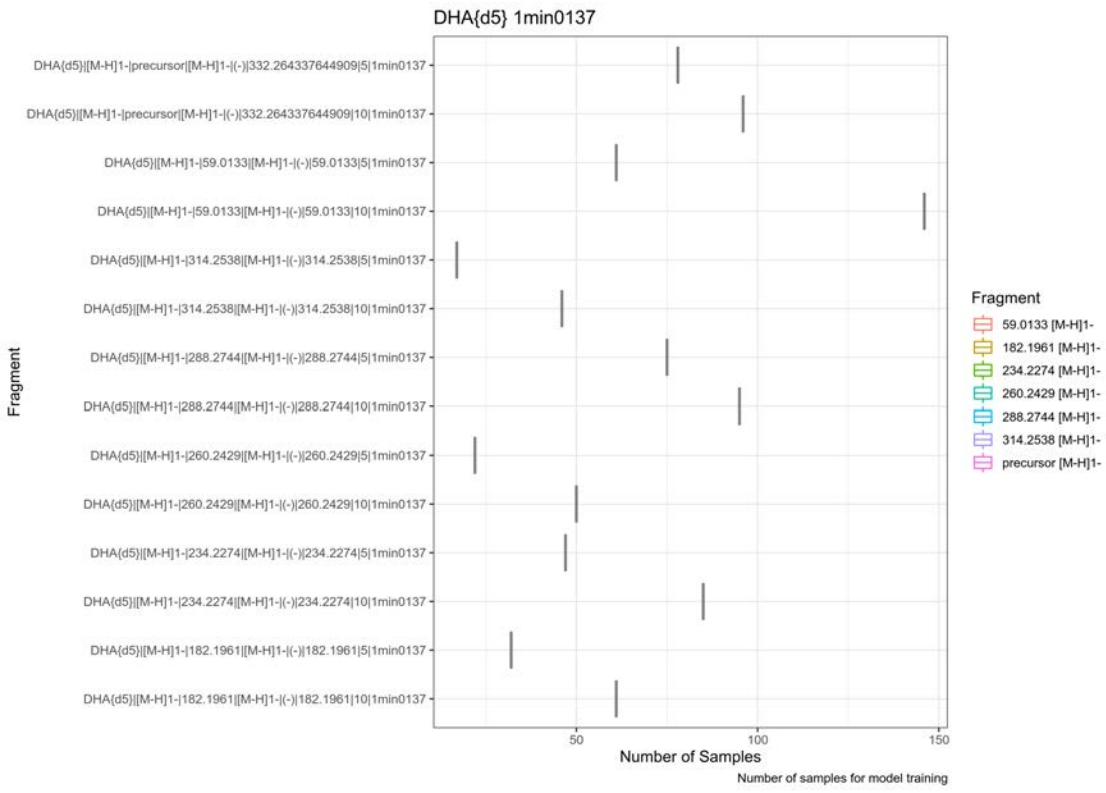

Figure 180. Number of samples used for training per combination Id

# 1.37. EPA{d5} [M-H]1- 1min0139

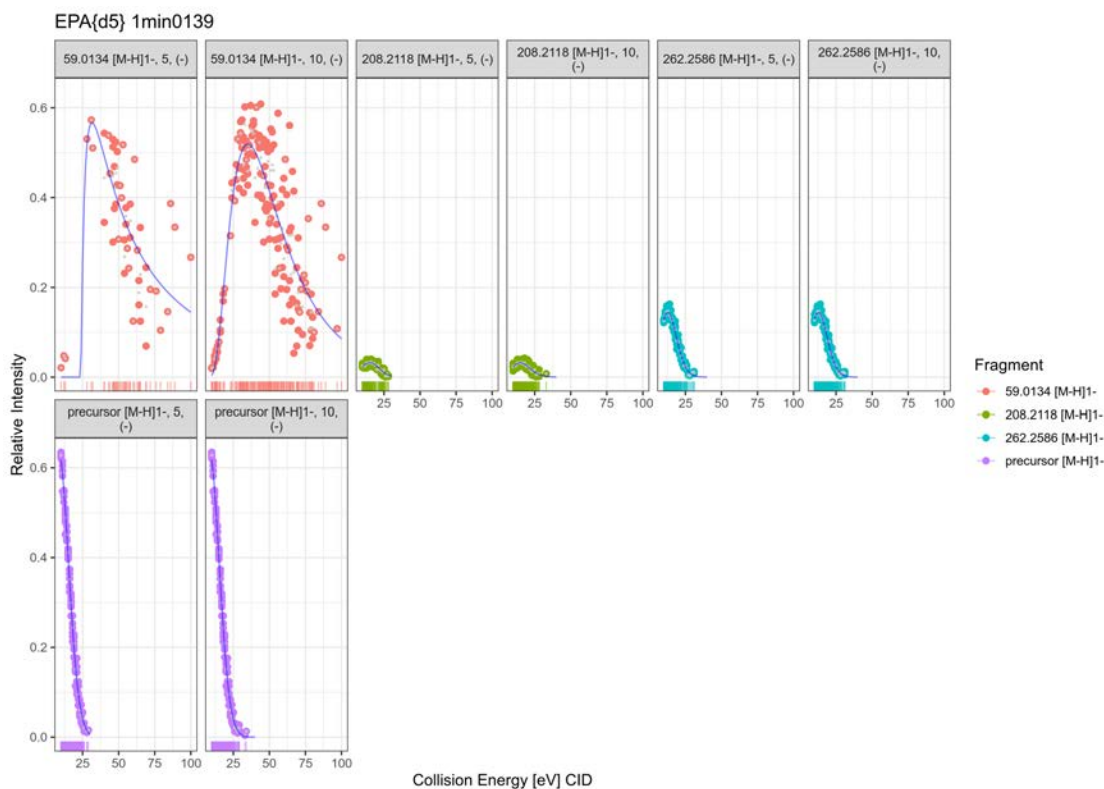

Figure 181. Nonlinear fit

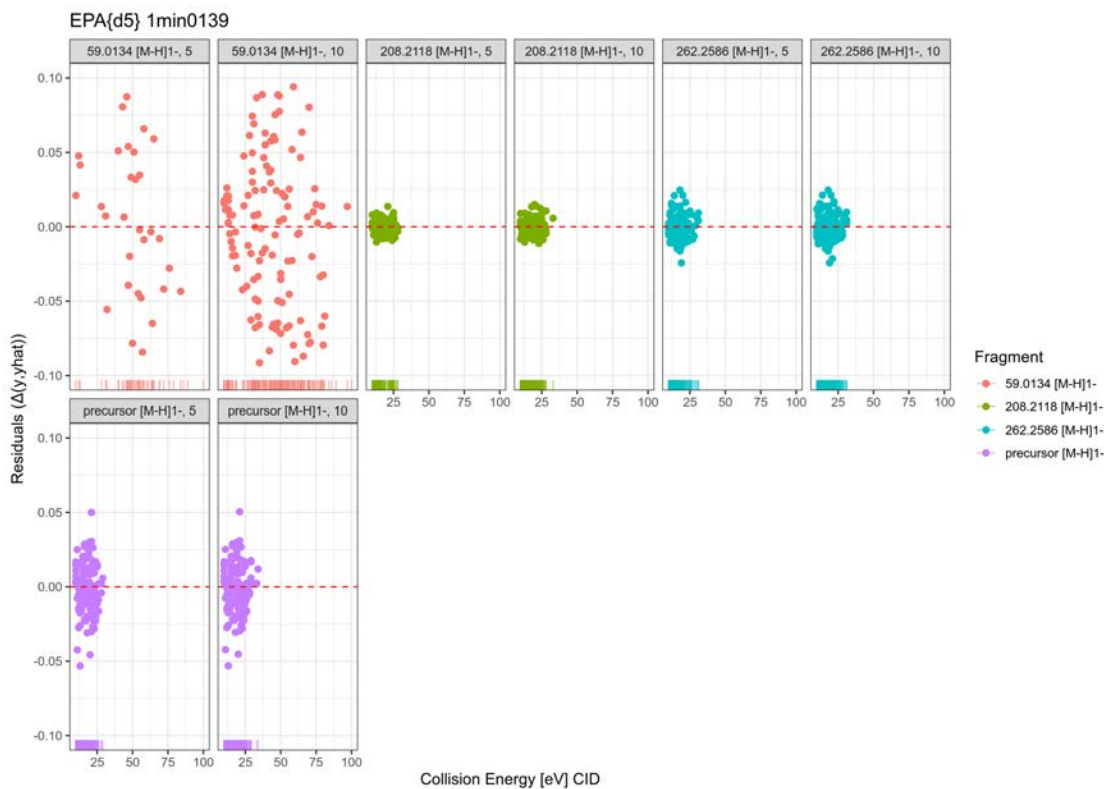

Figure 182. Residuals of nonlinear fit

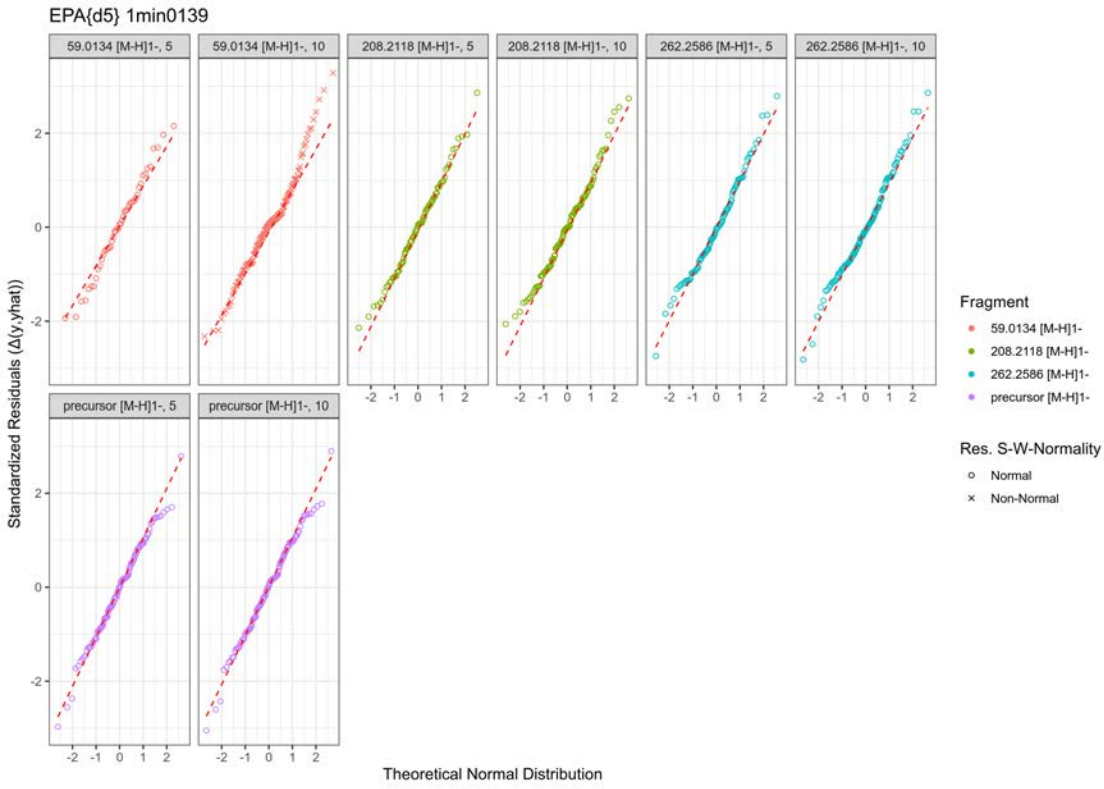

Figure 183. Quantile-quantile plot of residuals

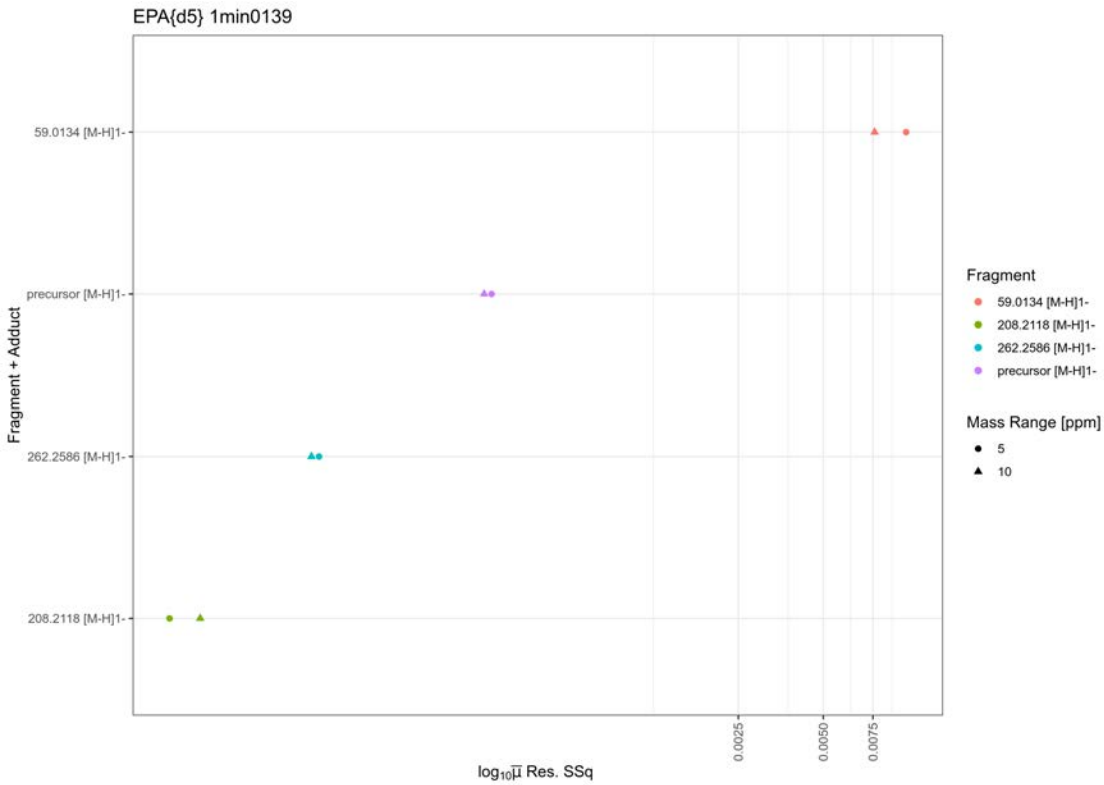

Figure 184. Normalized sum-of-squares of the residuals

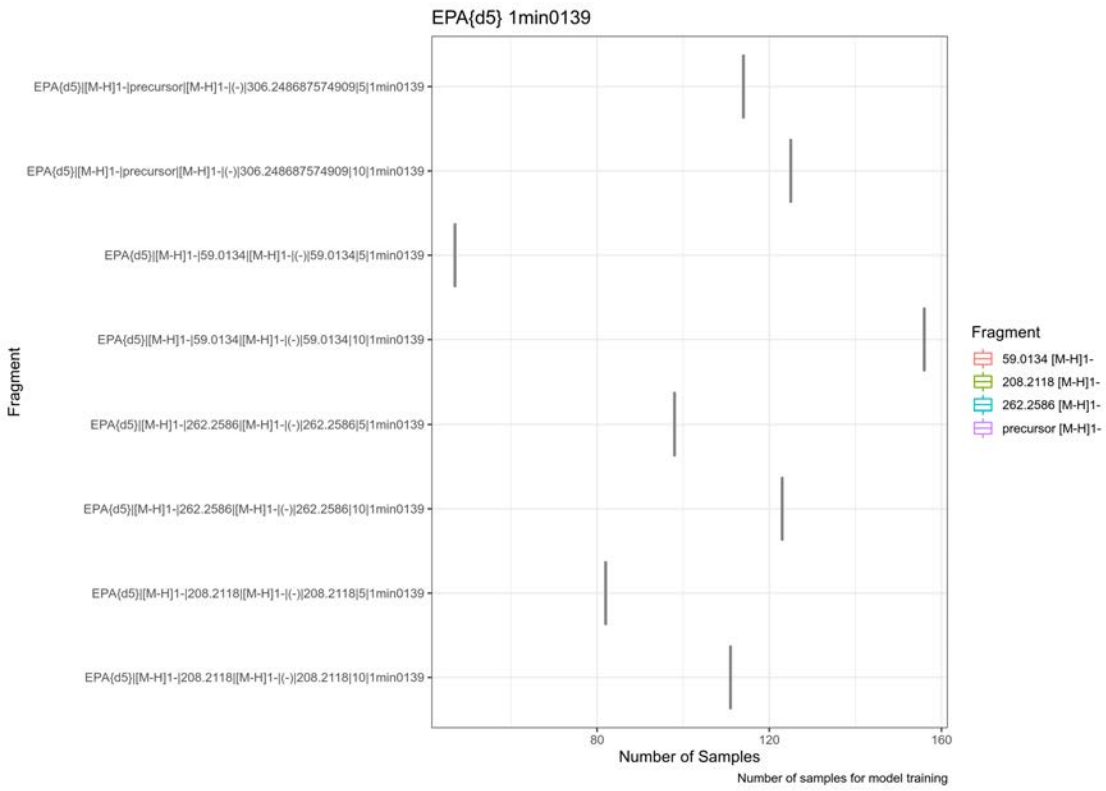

Figure 185. Number of samples used for training per combination Id



# 1.38. LTB4{d4} [M-H]1- 1min0145

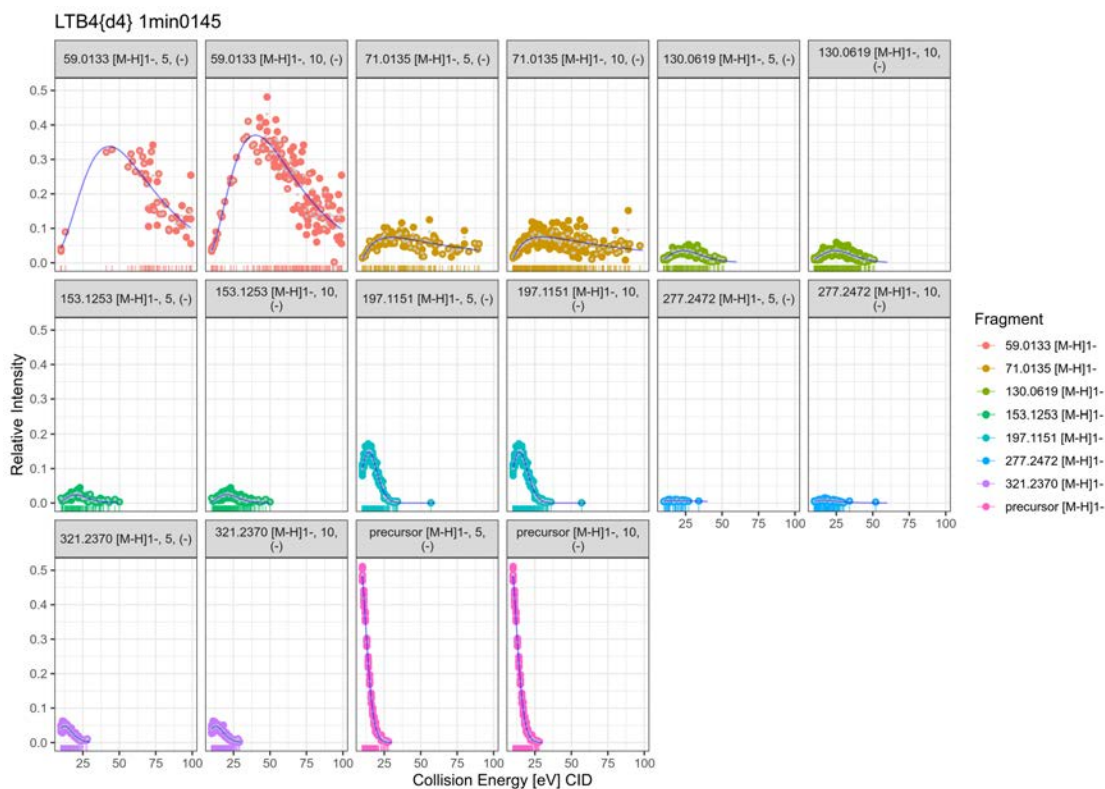

Figure 186. Nonlinear fit

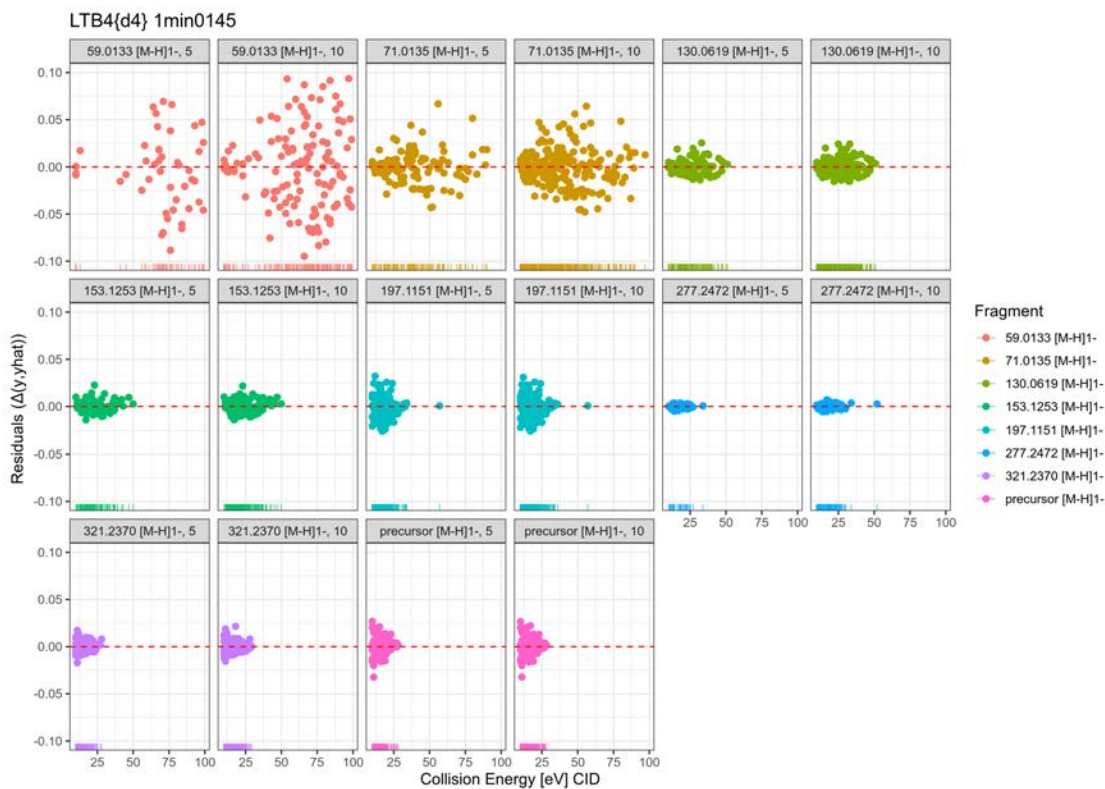

Figure 187. Residuals of nonlinear fit

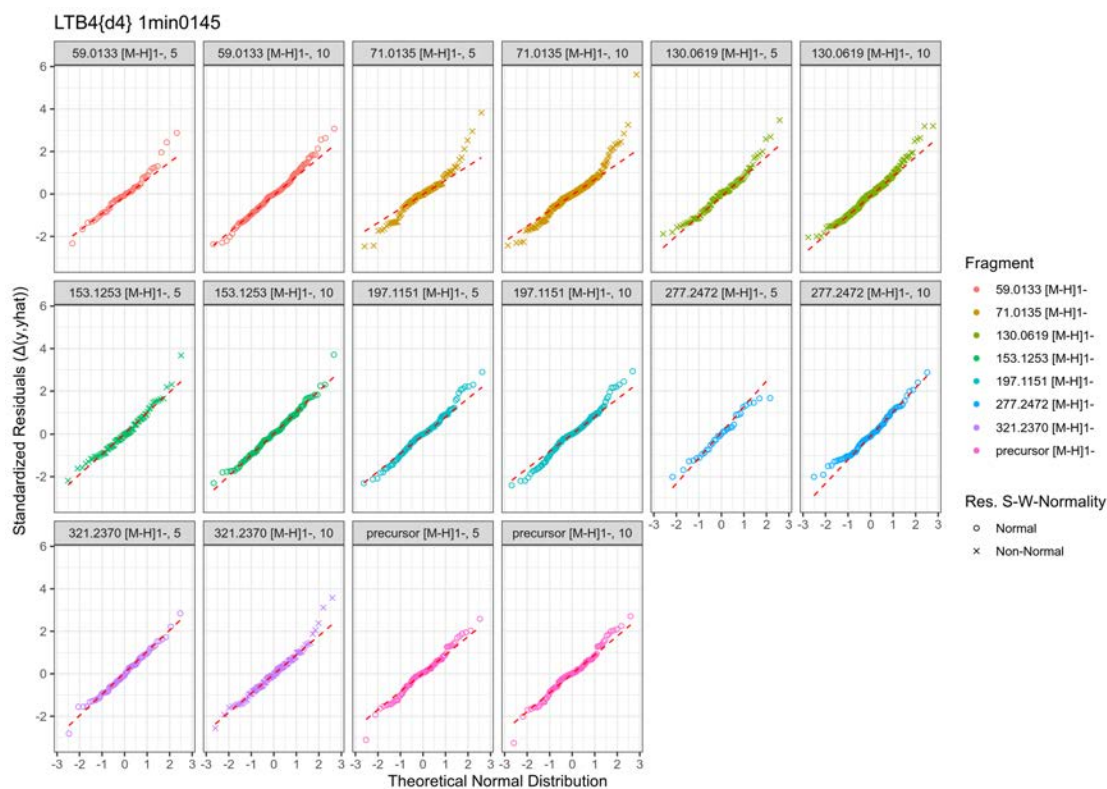

Figure 188. Quantile-quantile plot of residuals

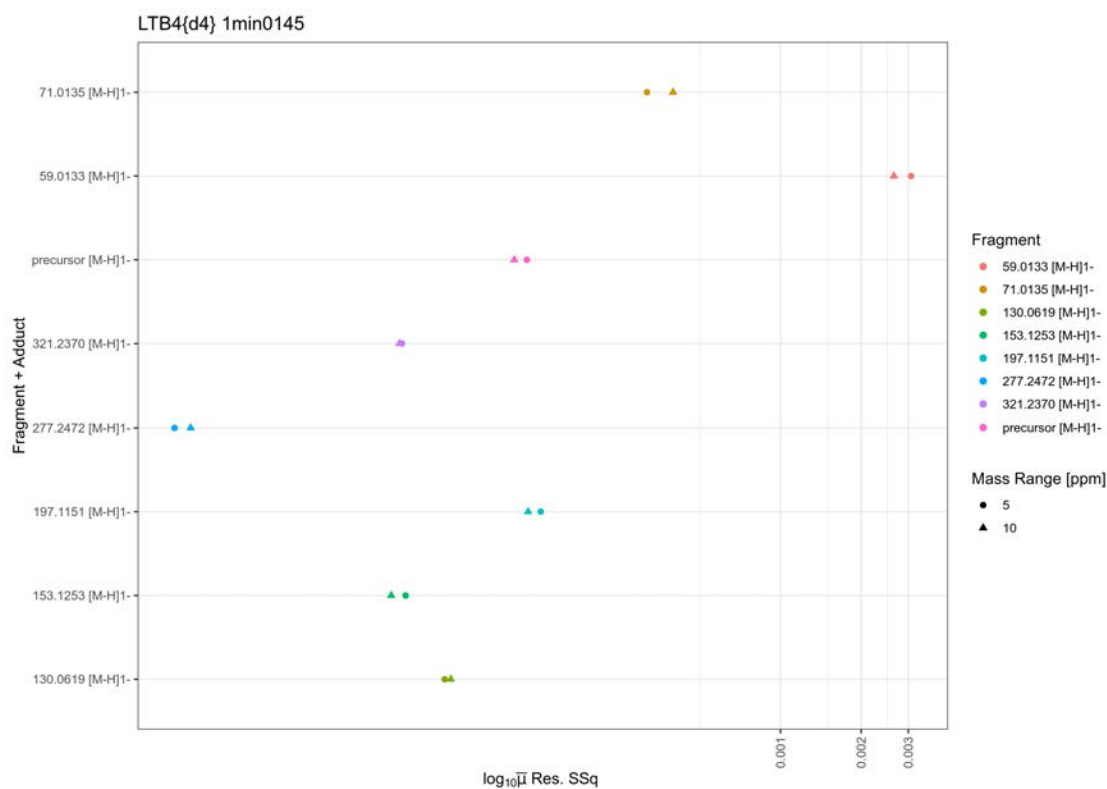

Figure 189. Normalized sum-of-squares of the residuals

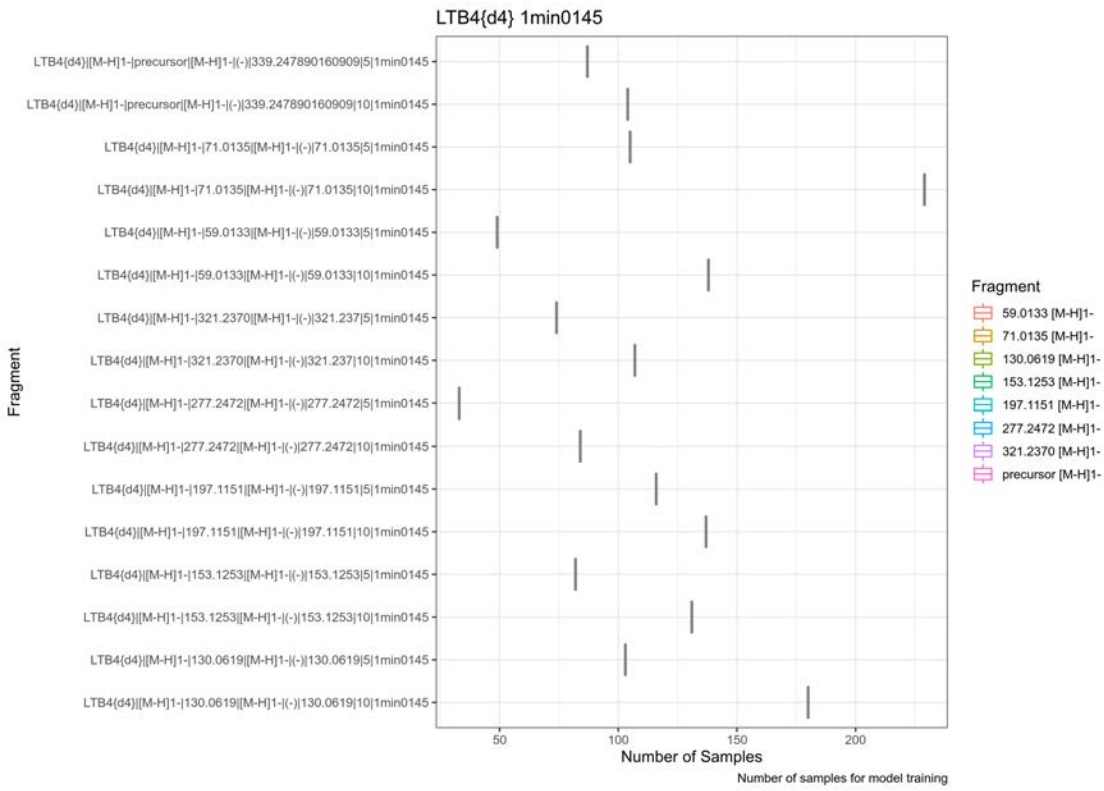

Figure 190. Number of samples used for training per combination Id

# 1.39. LTC4{d5} [M-H]1- 1min0232

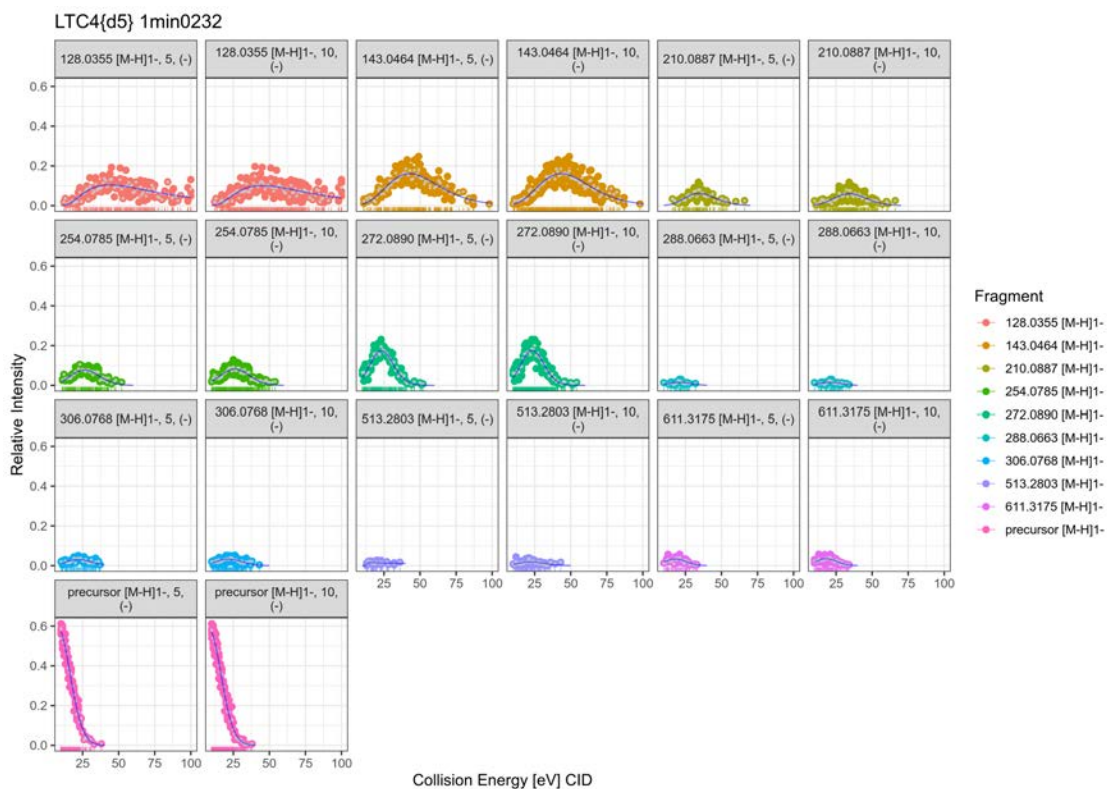

Figure 191. Nonlinear fit

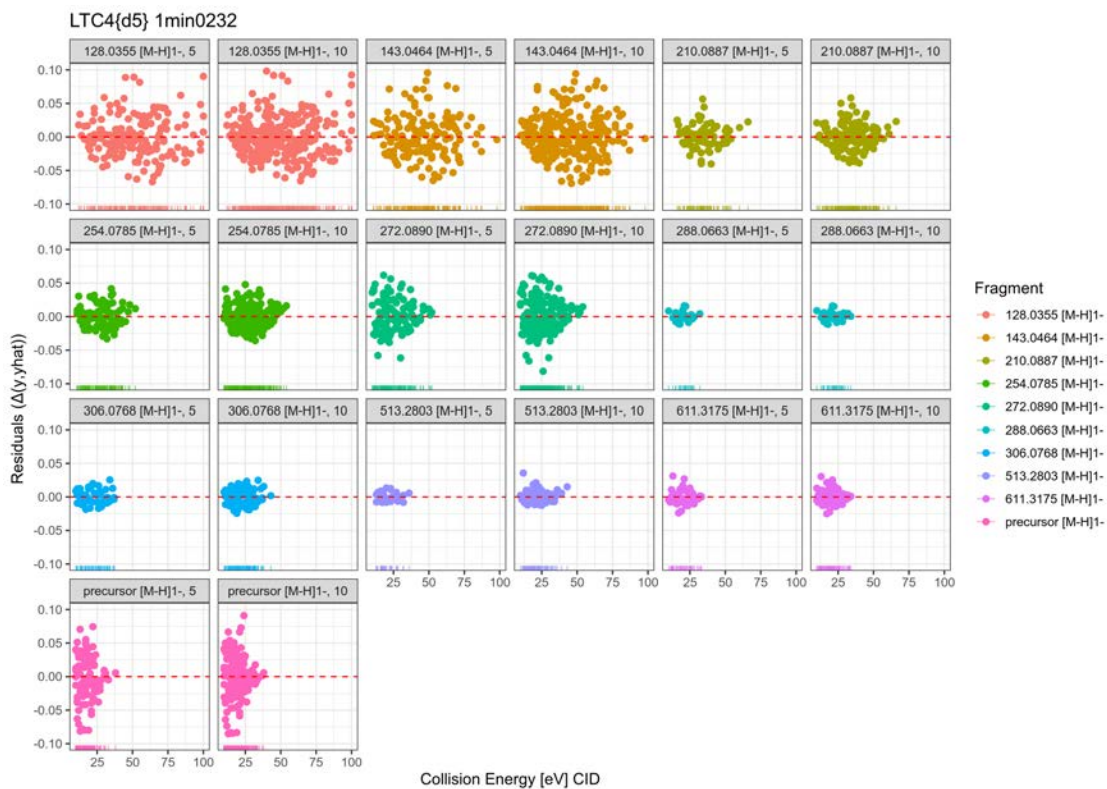

Figure 192. Residuals of nonlinear fit

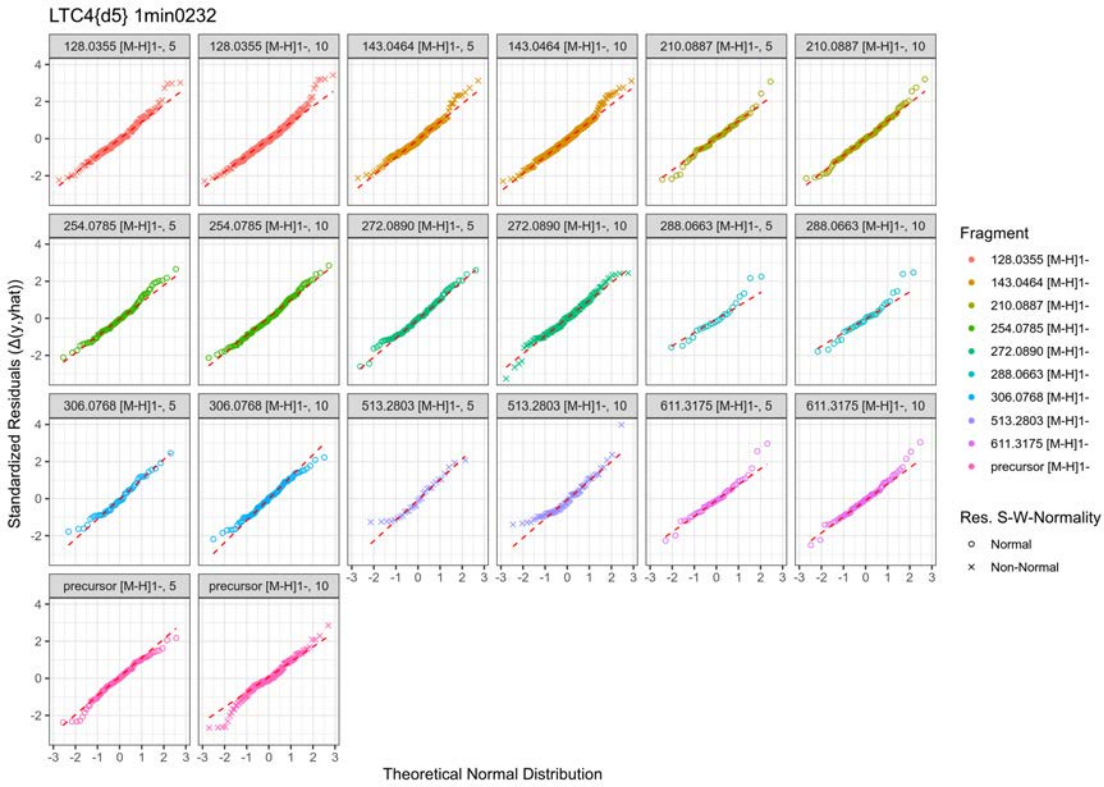

Figure 193. Quantile-quantile plot of residuals

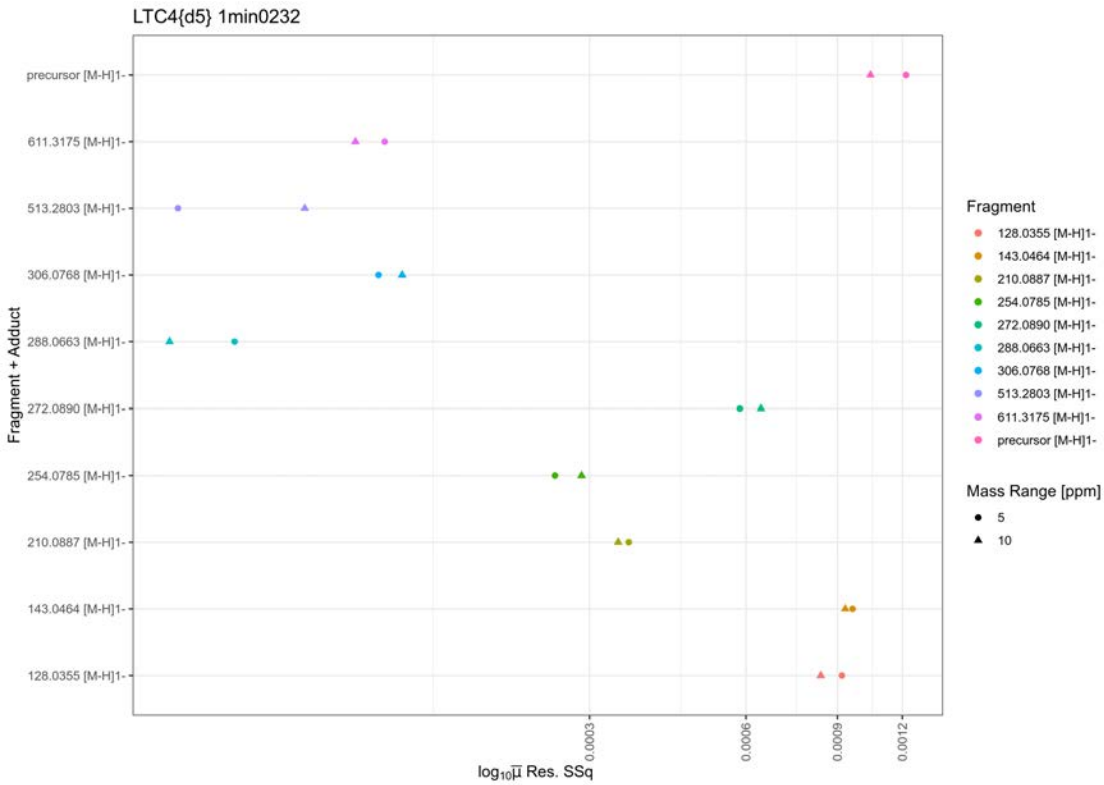

Figure 194. Normalized sum-of-squares of the residuals



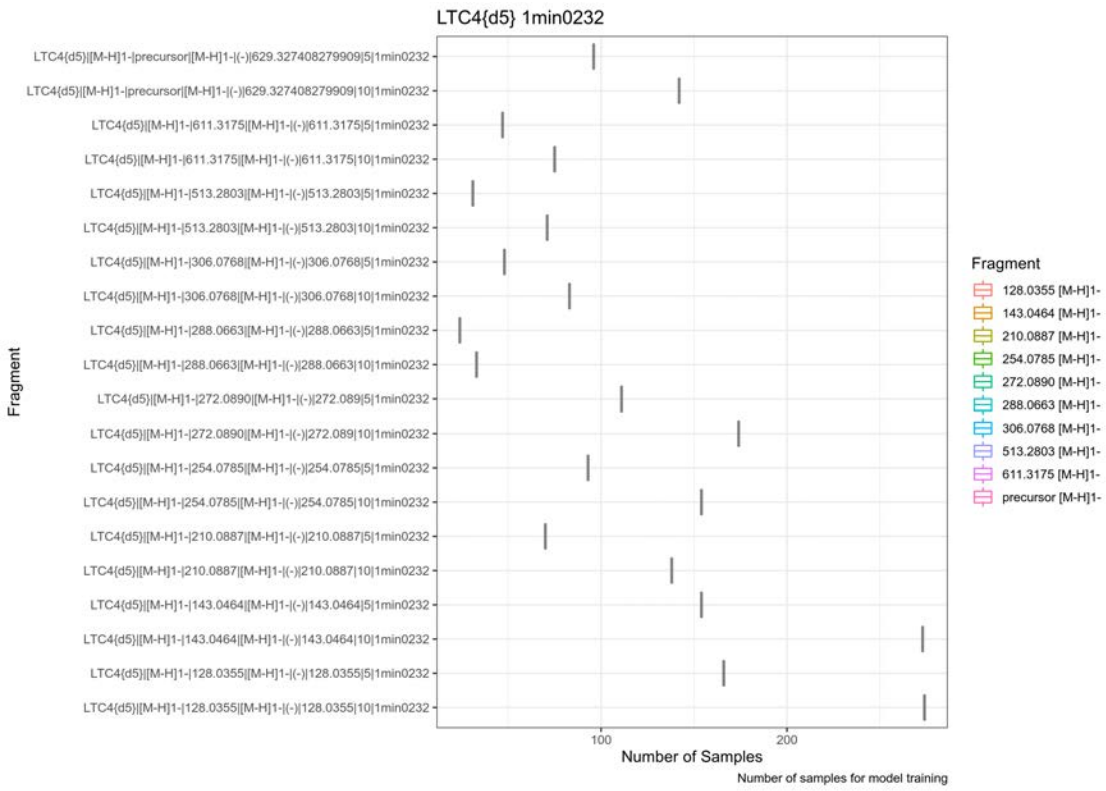

Figure 195. Number of samples used for training per combination Id

# 1.40. LTD4{d5} [M-H]1- 1min0222

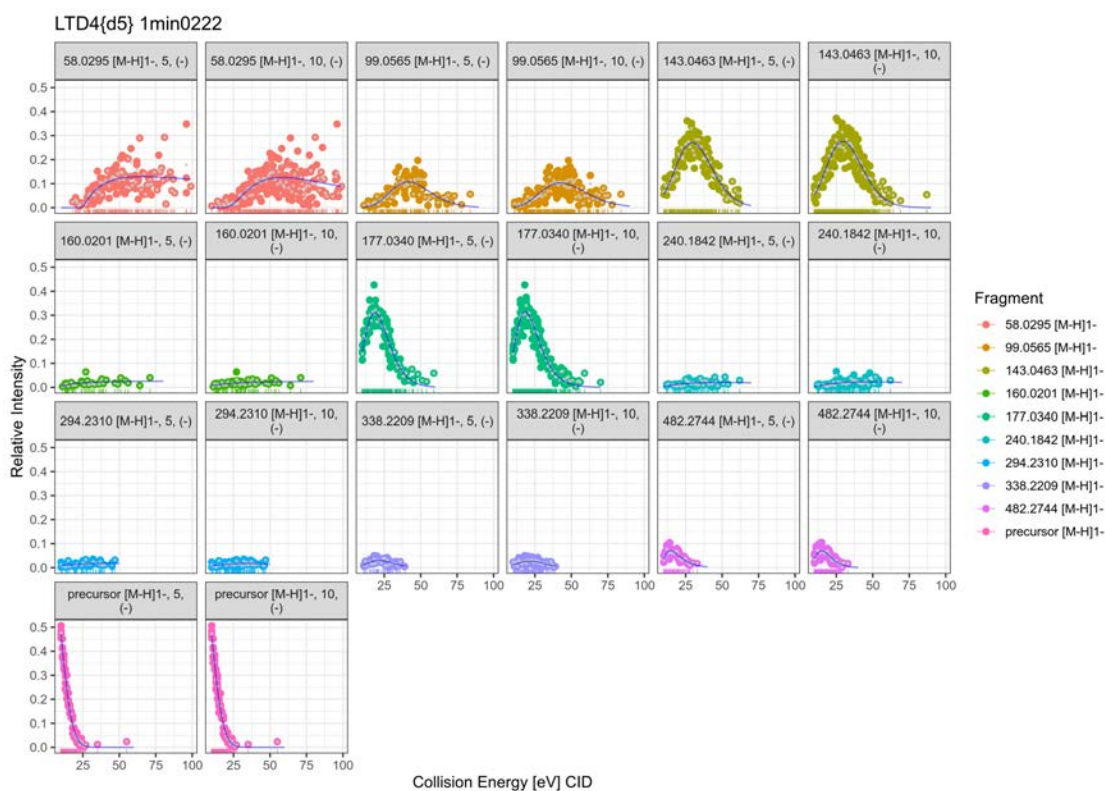

Figure 196. Nonlinear fit

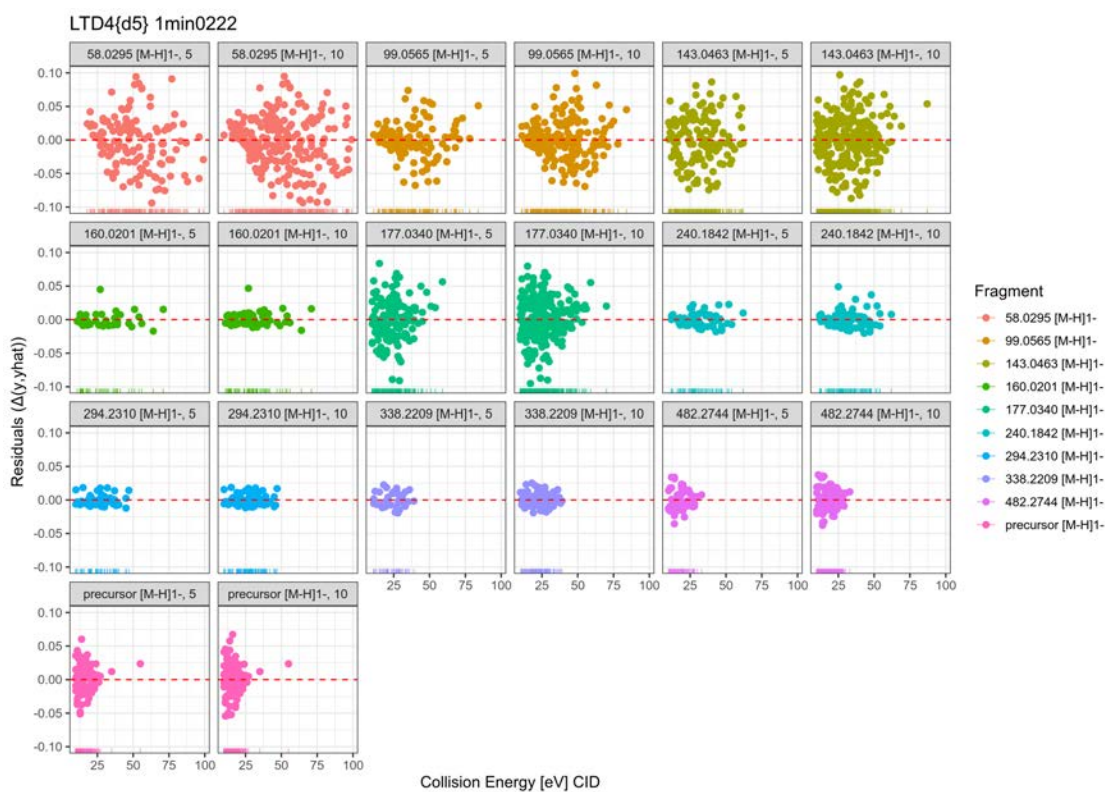

Figure 197. Residuals of nonlinear fit

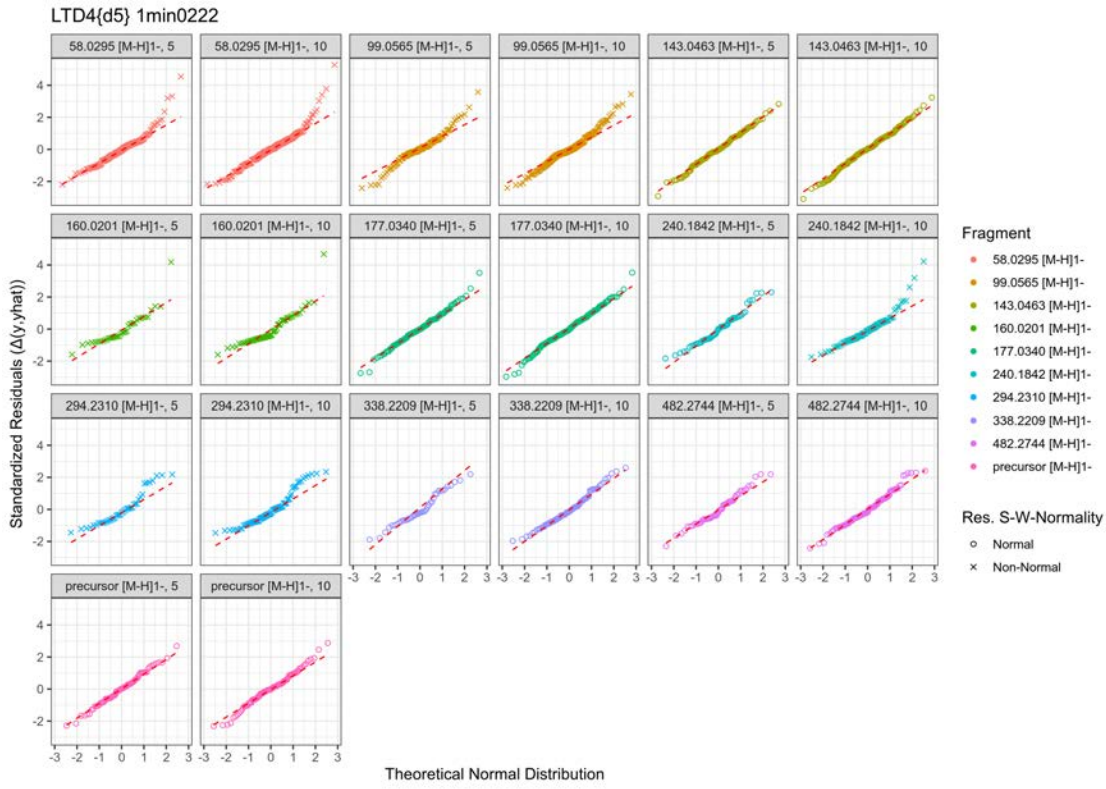

Figure 198. Quantile-quantile plot of residuals

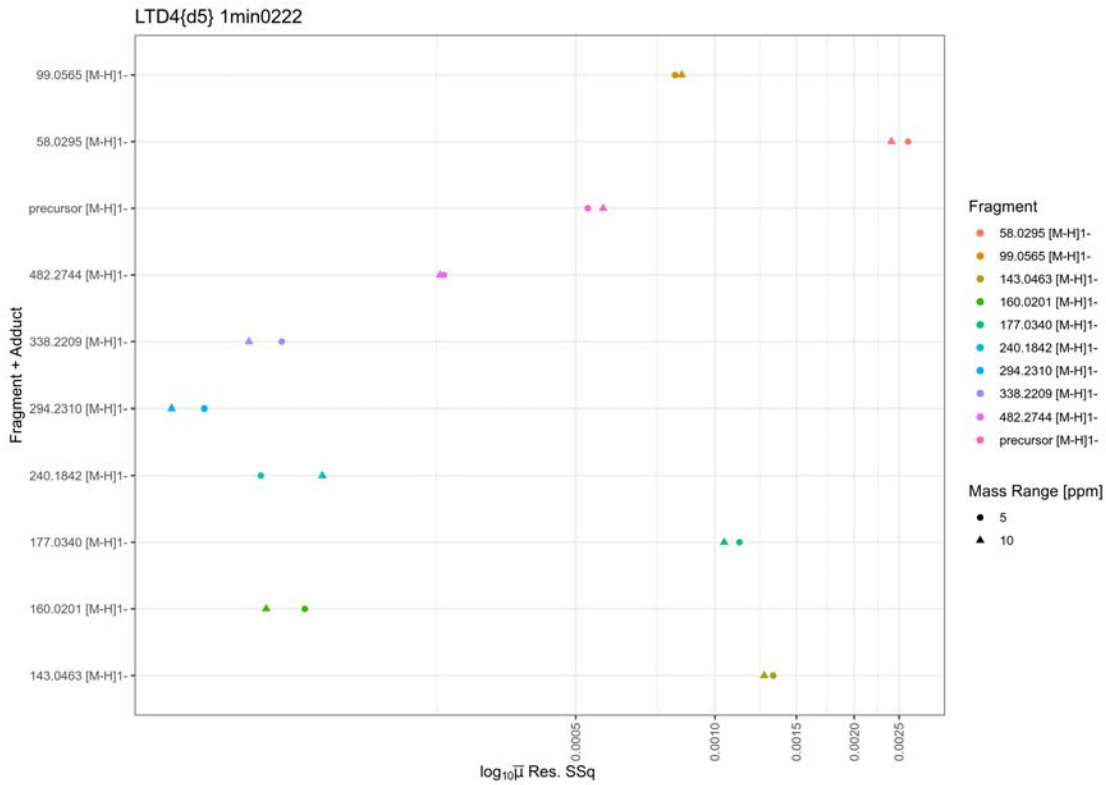

Figure 199. Normalized sum-of-squares of the residuals

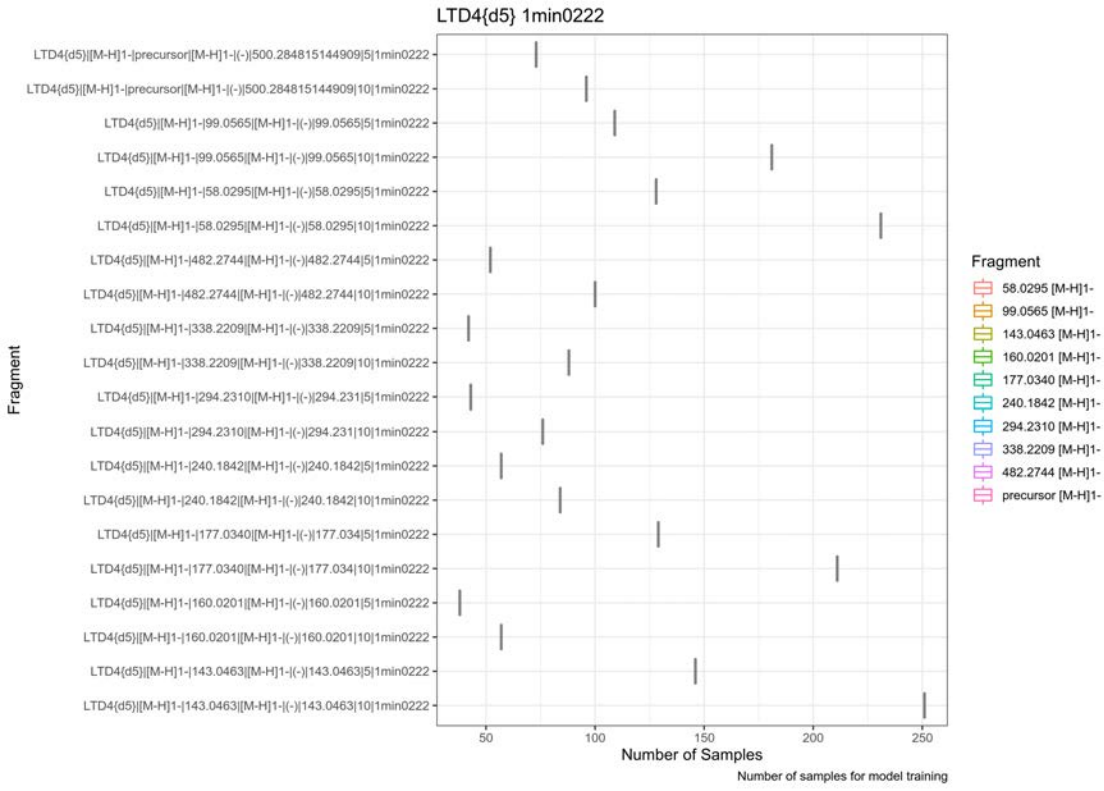

Figure 200. Number of samples used for training per combination Id

# 1.41. PGB2{d4} [M-H]1- 1min0220

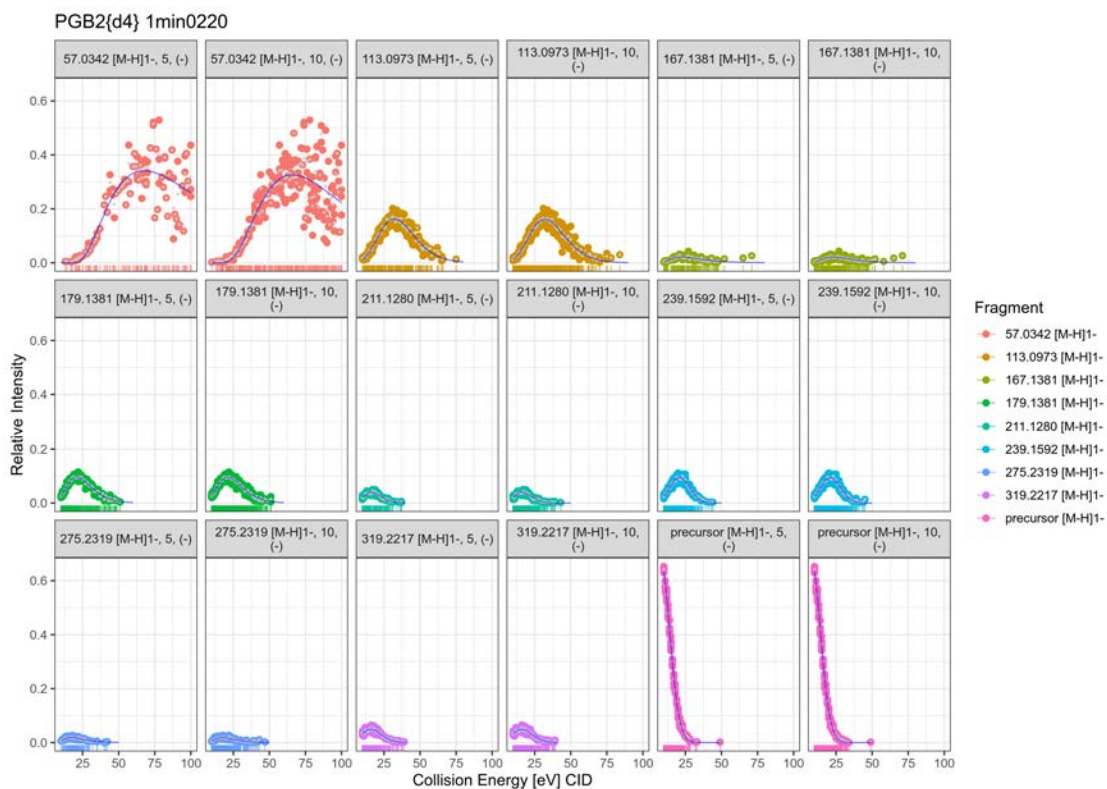

Figure 201. Nonlinear fit

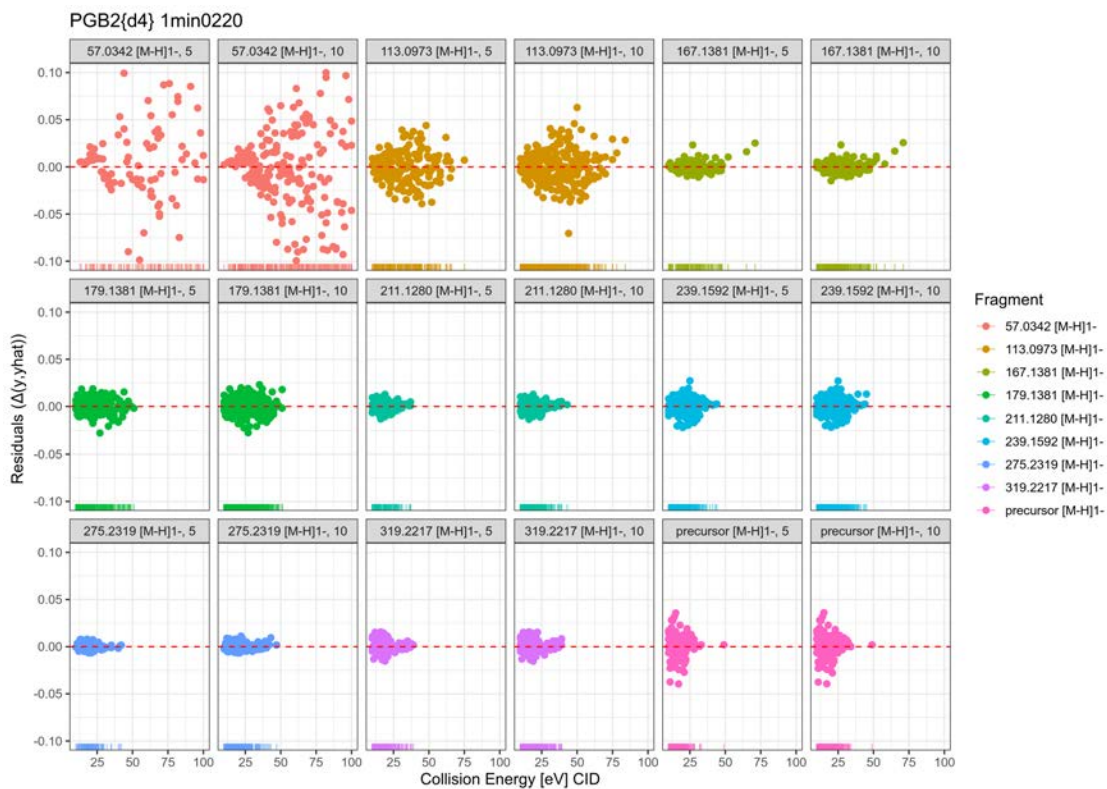

Figure 202. Residuals of nonlinear fit



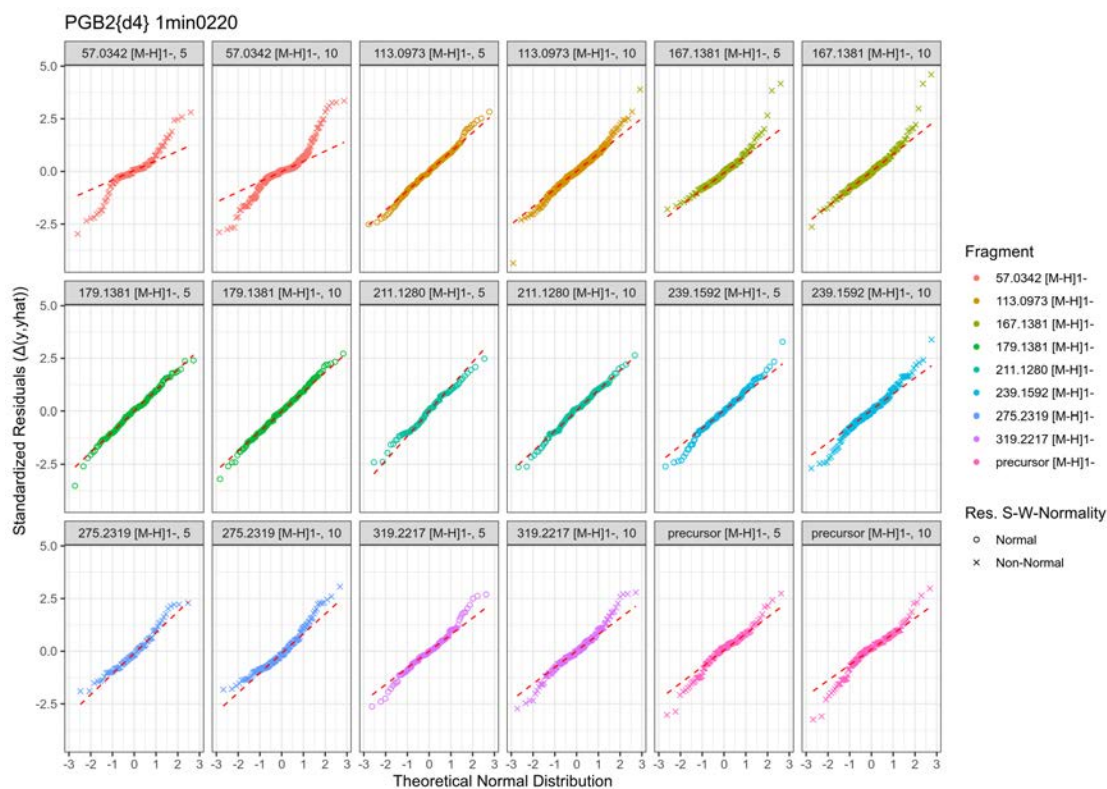

Figure 203. Quantile-quantile plot of residuals

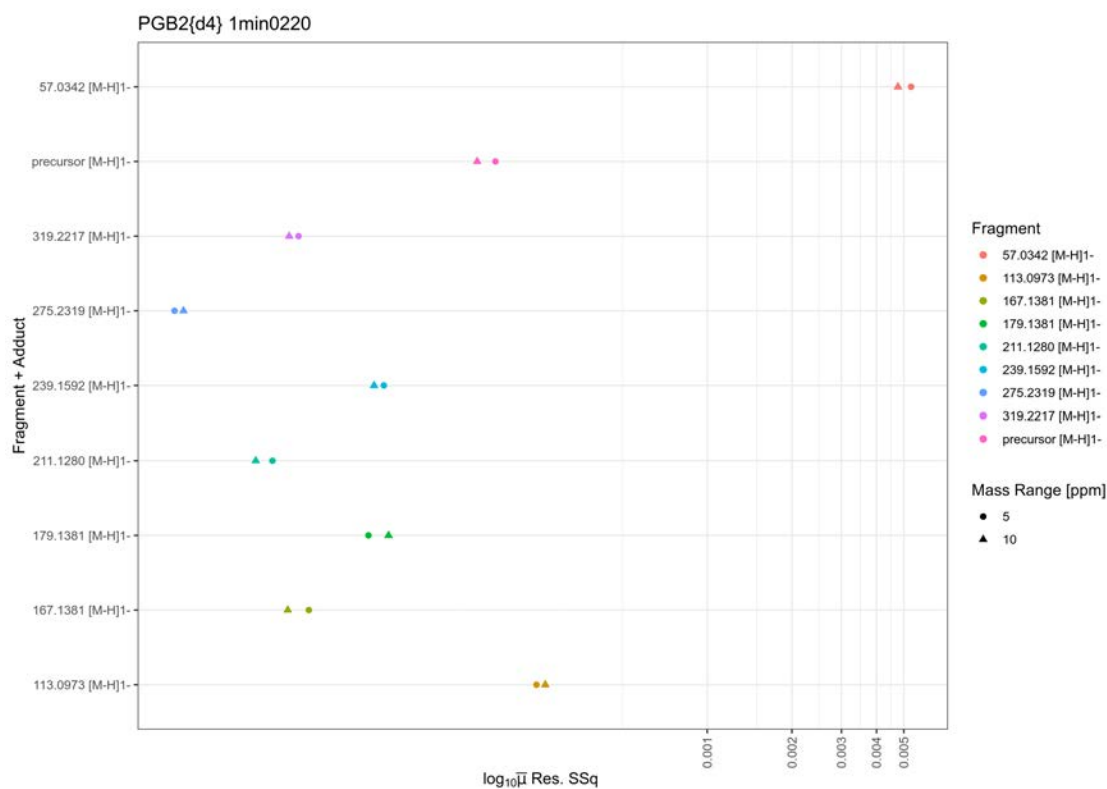

Figure 204. Normalized sum-of-squares of the residuals

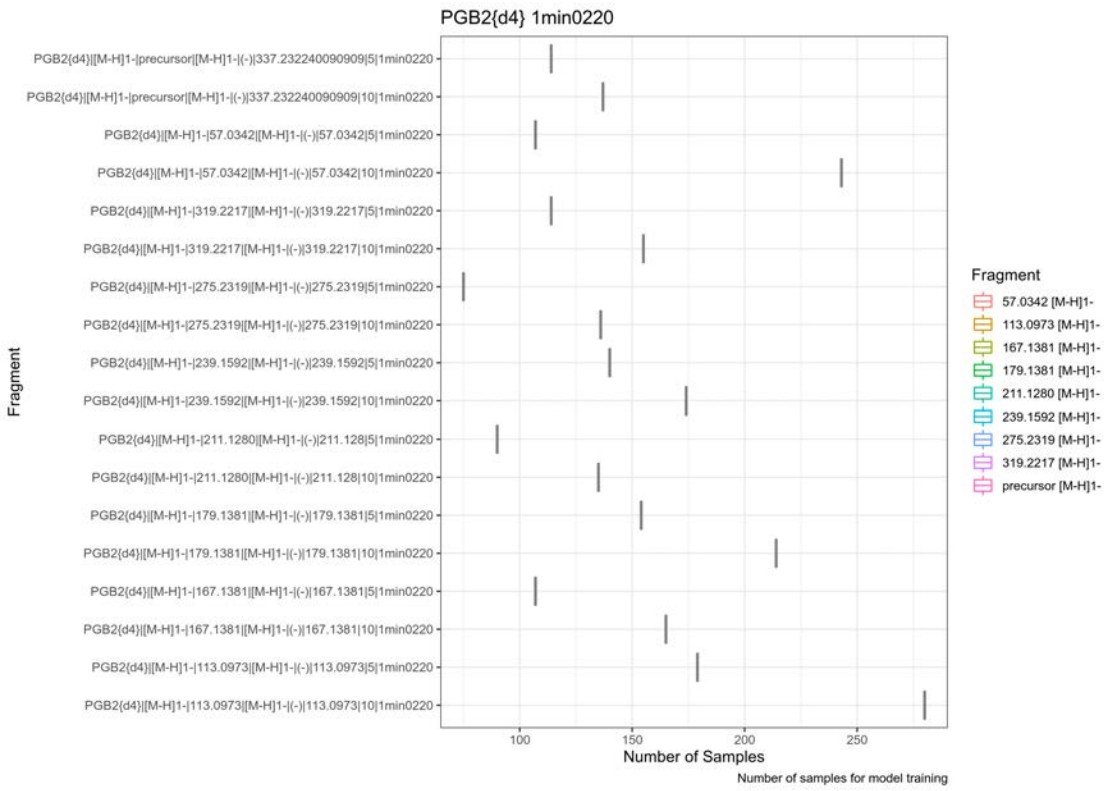

Figure 205. Number of samples used for training per combination Id

# 1.42. PGD2{d4} [M-H]1- 1min0151

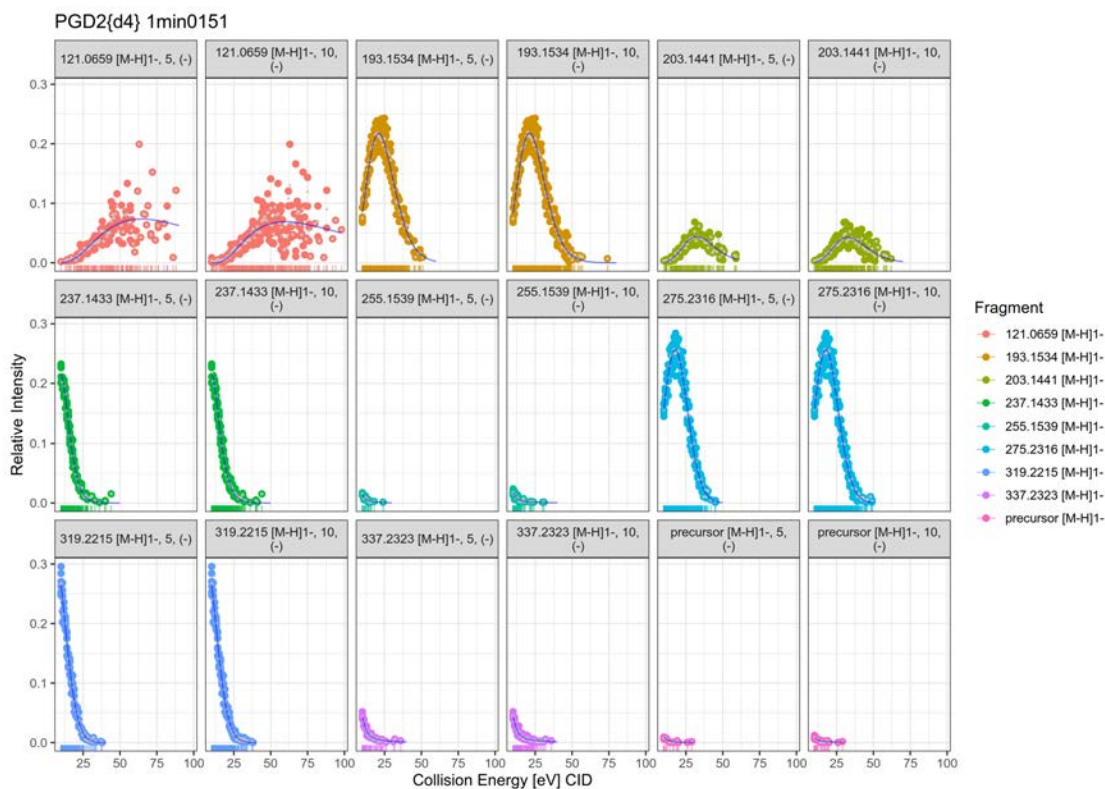

Figure 206. Nonlinear fit

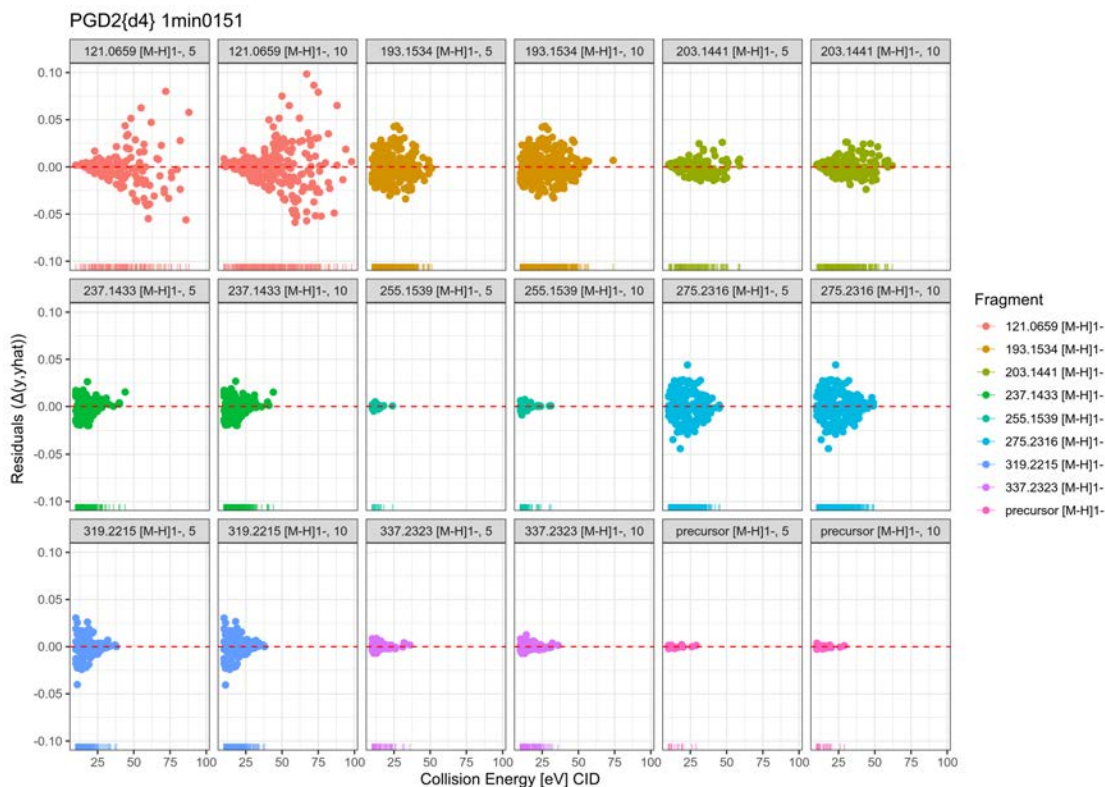

Figure 207. Residuals of nonlinear fit

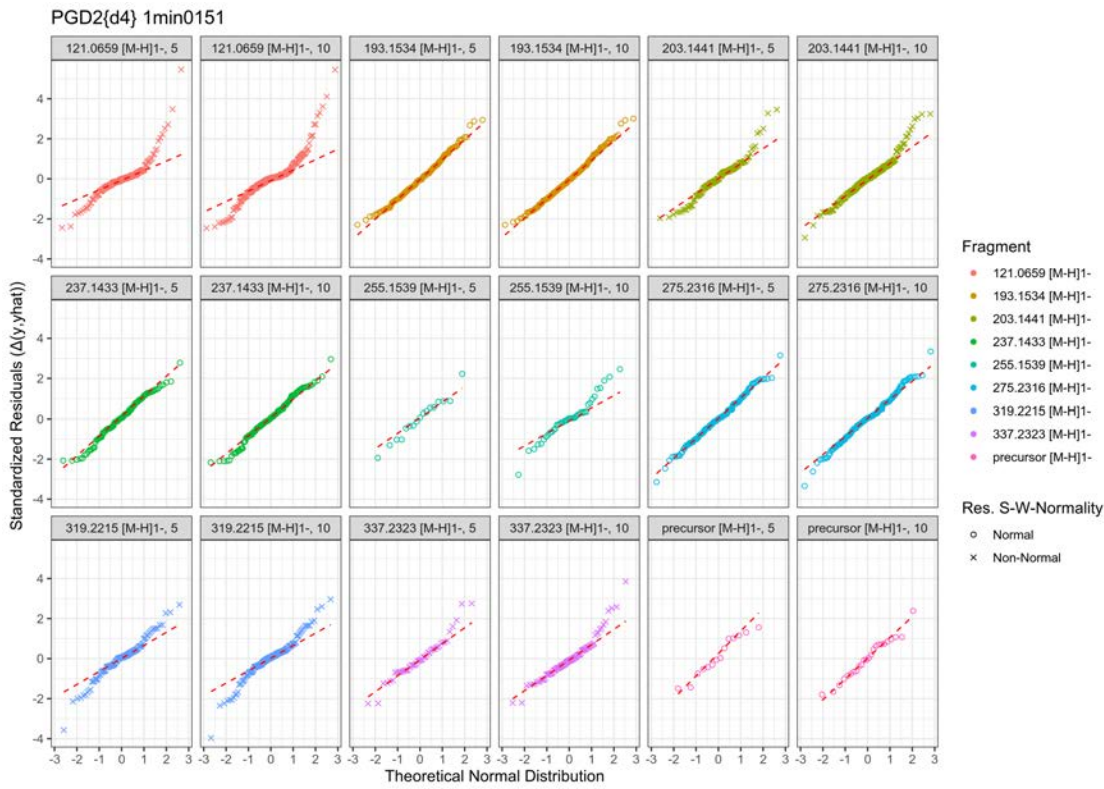

Figure 208. Quantile-quantile plot of residuals

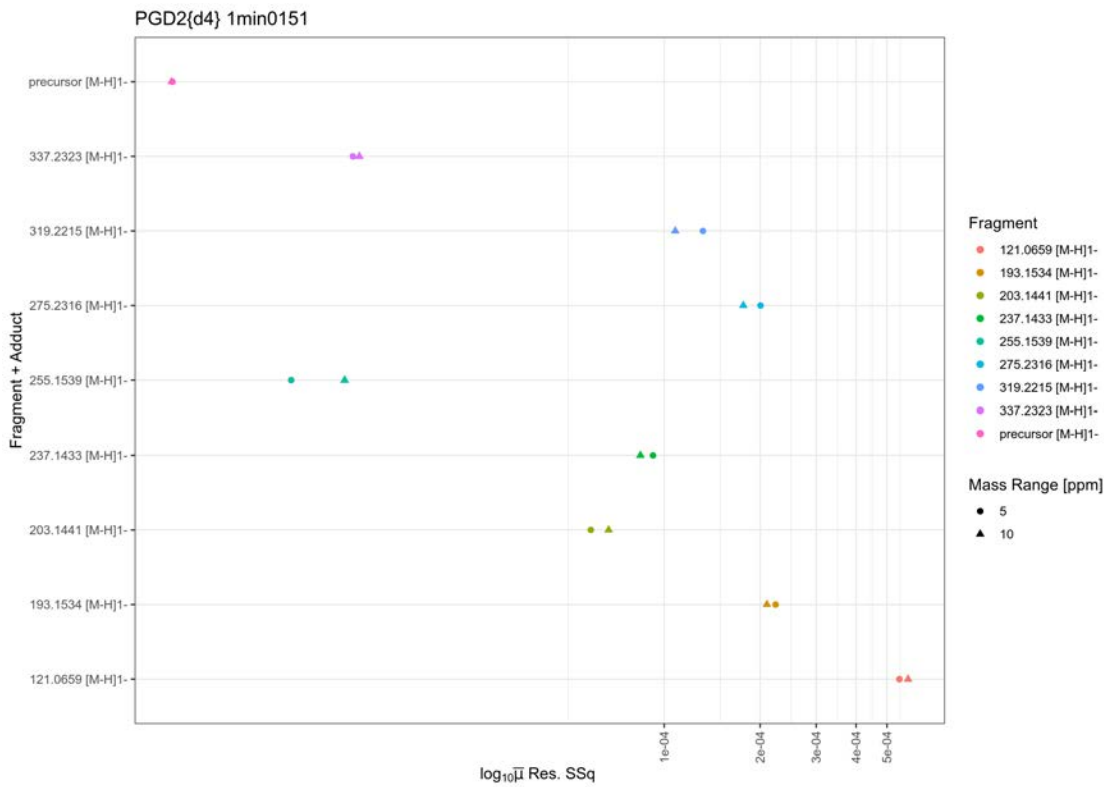

Figure 209. Normalized sum-of-squares of the residuals

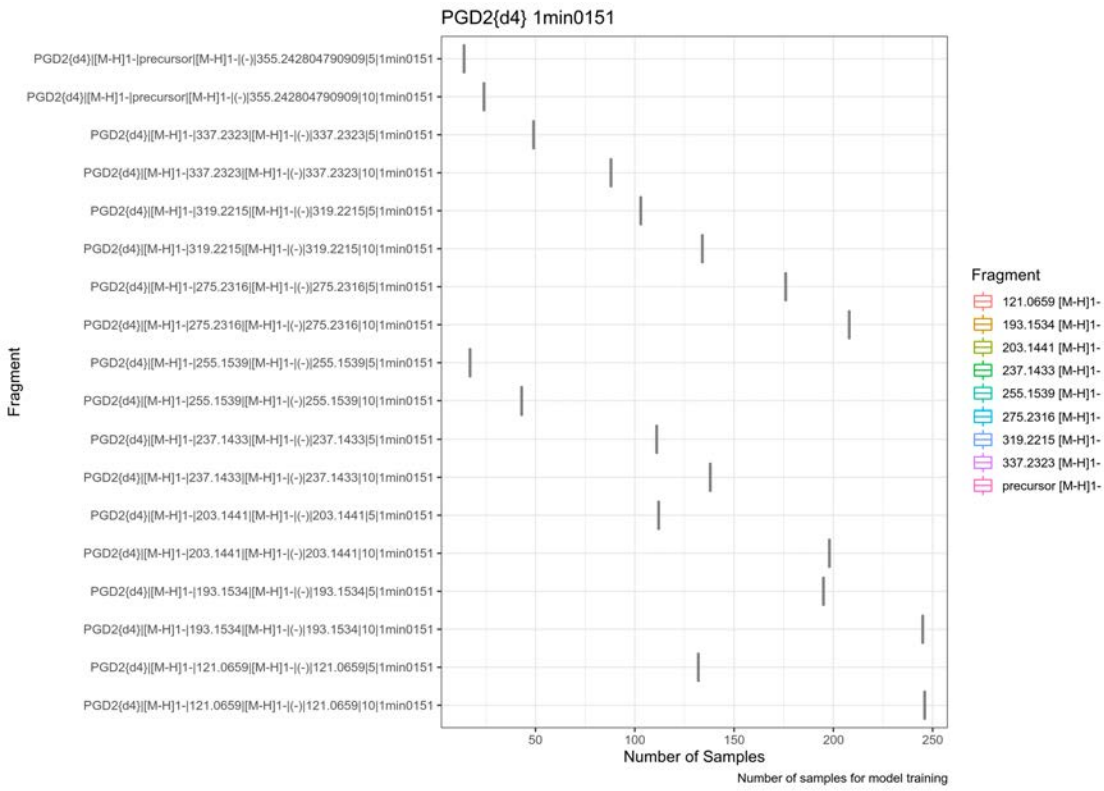

Figure 210. Number of samples used for training per combination Id



# 1.43. PGE2{d4} [M-H]1- 1min0241

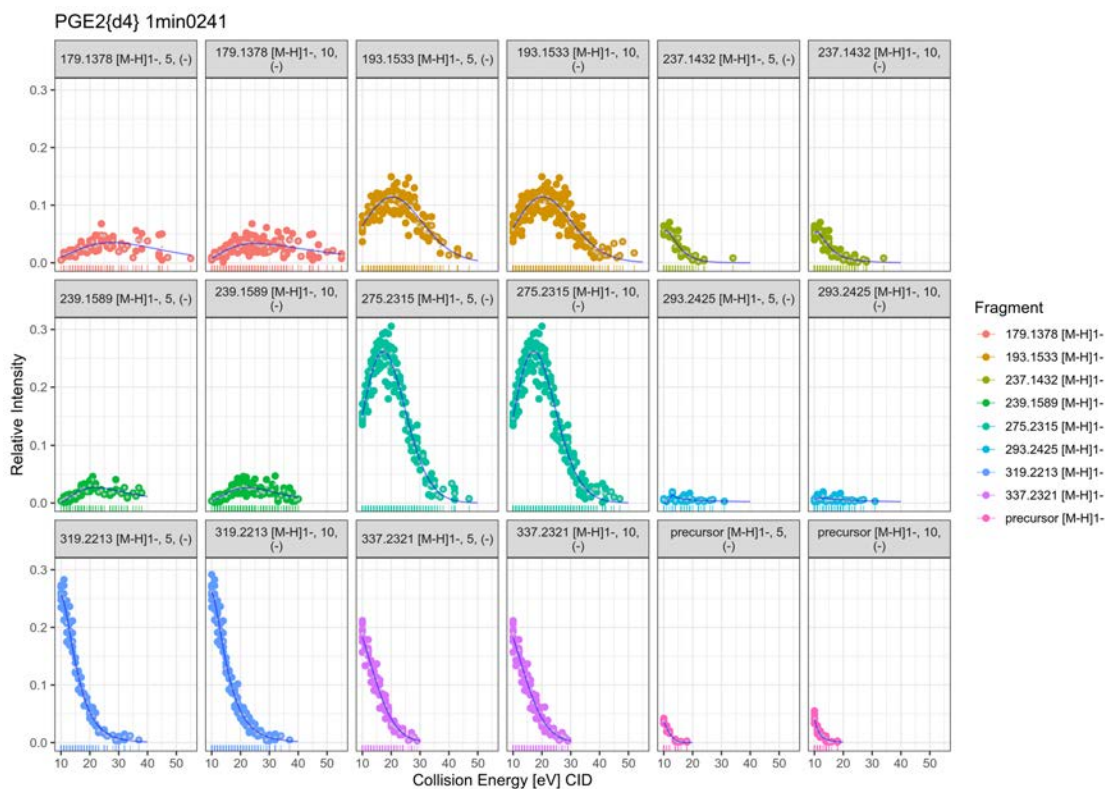

Figure 211. Nonlinear fit

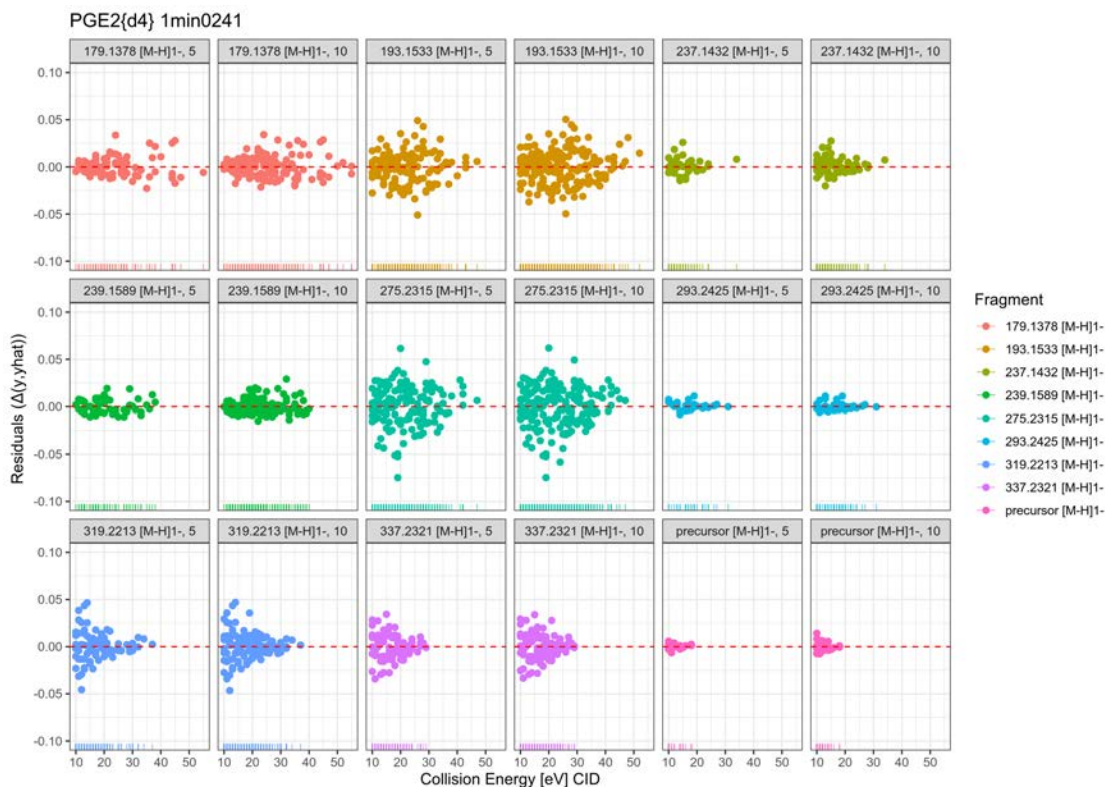

Figure 212. Residuals of nonlinear fit

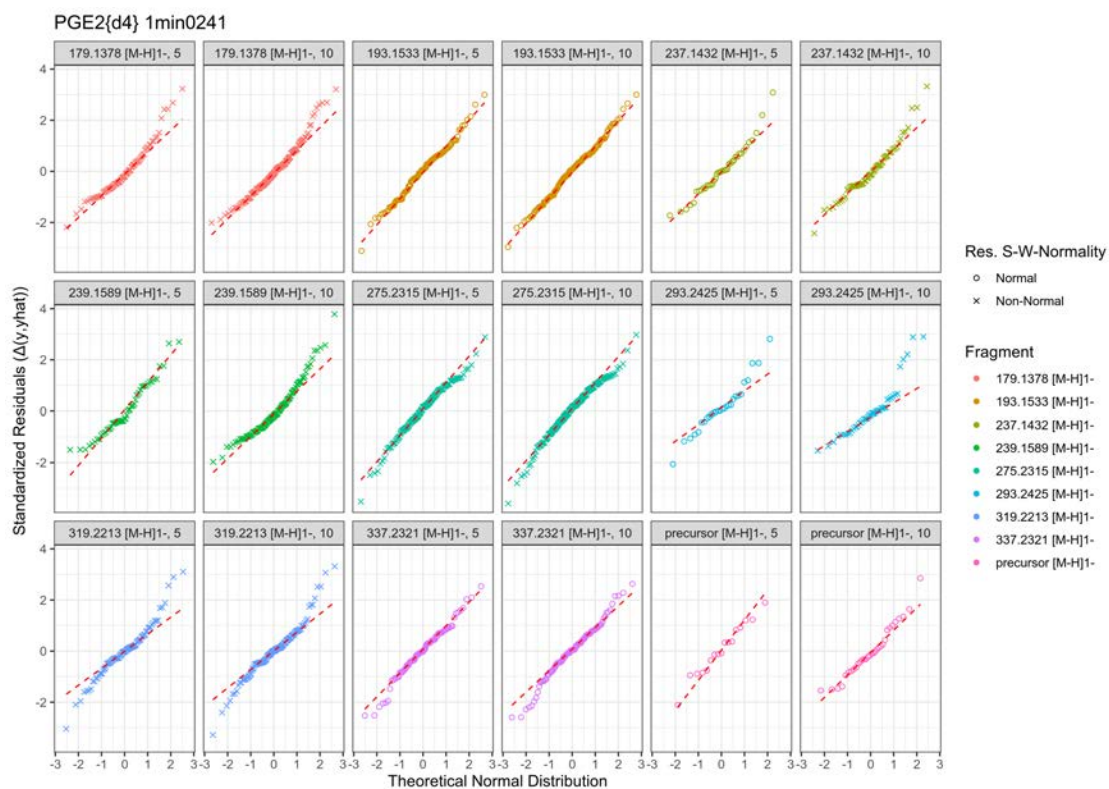

Figure 213. Quantile-quantile plot of residuals

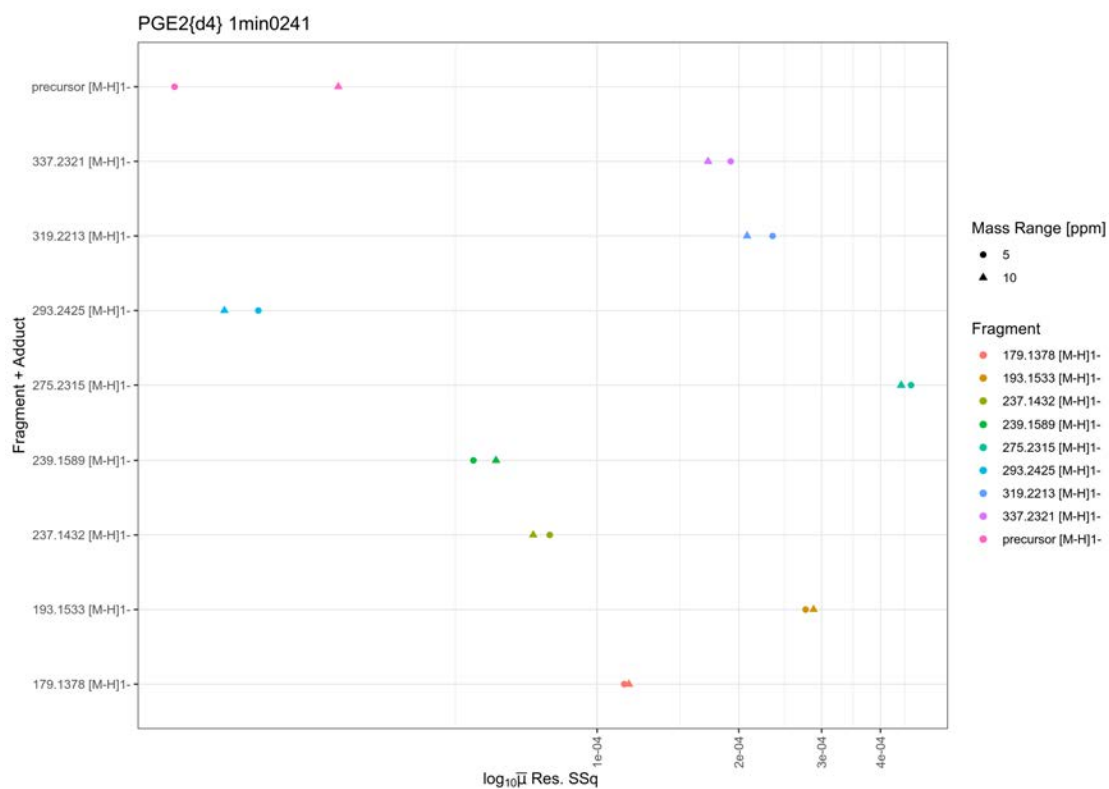

Figure 214. Normalized sum-of-squares of the residuals

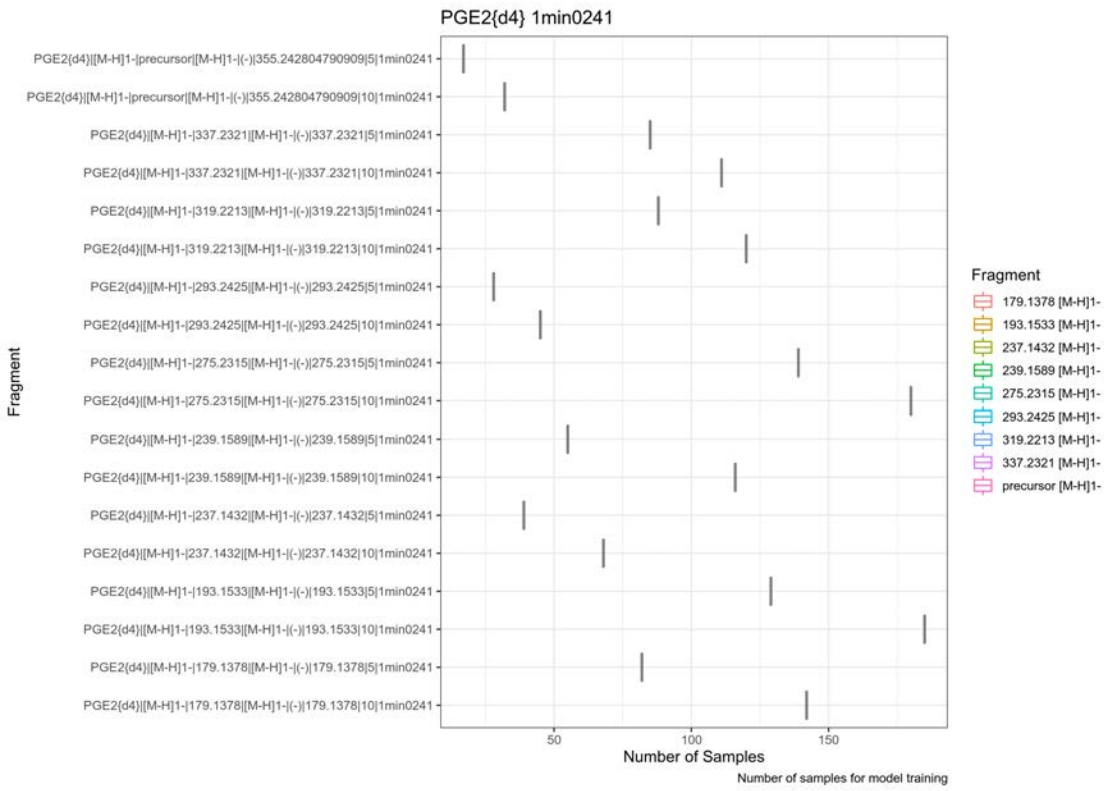

Figure 215. Number of samples used for training per combination Id

# 1.44. PGE2{d9} [M-H]1- 1min0164

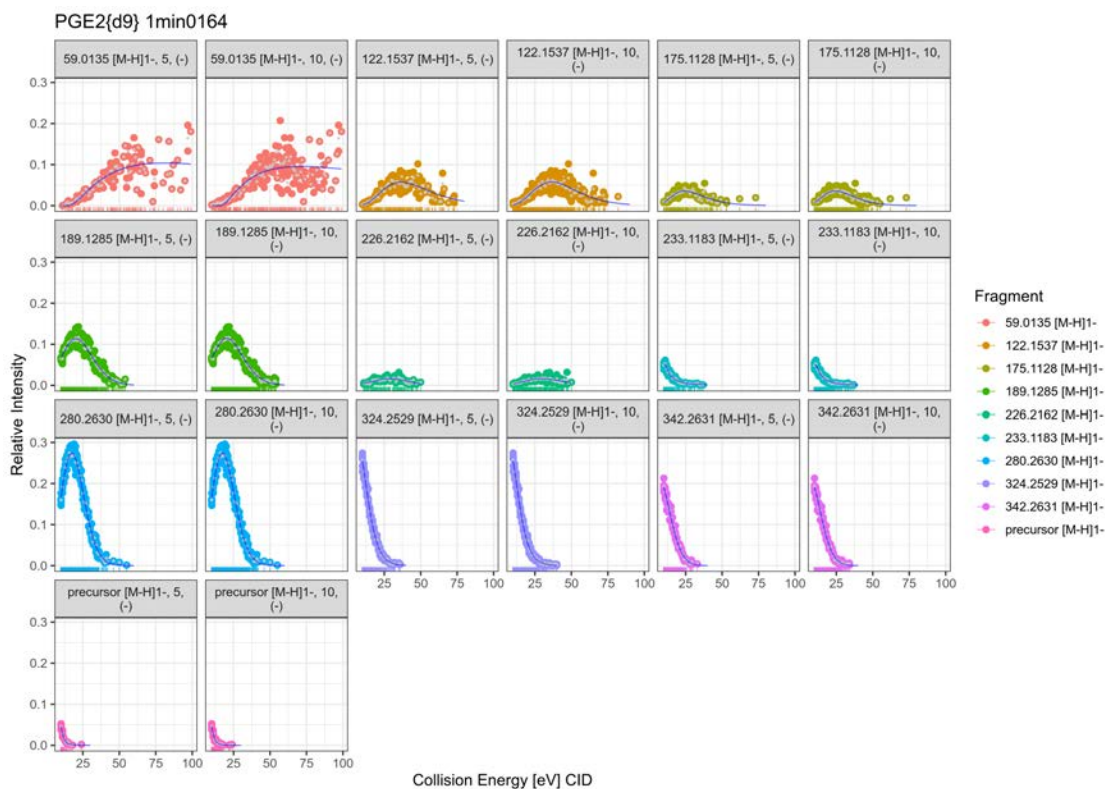

Figure 216. Nonlinear fit

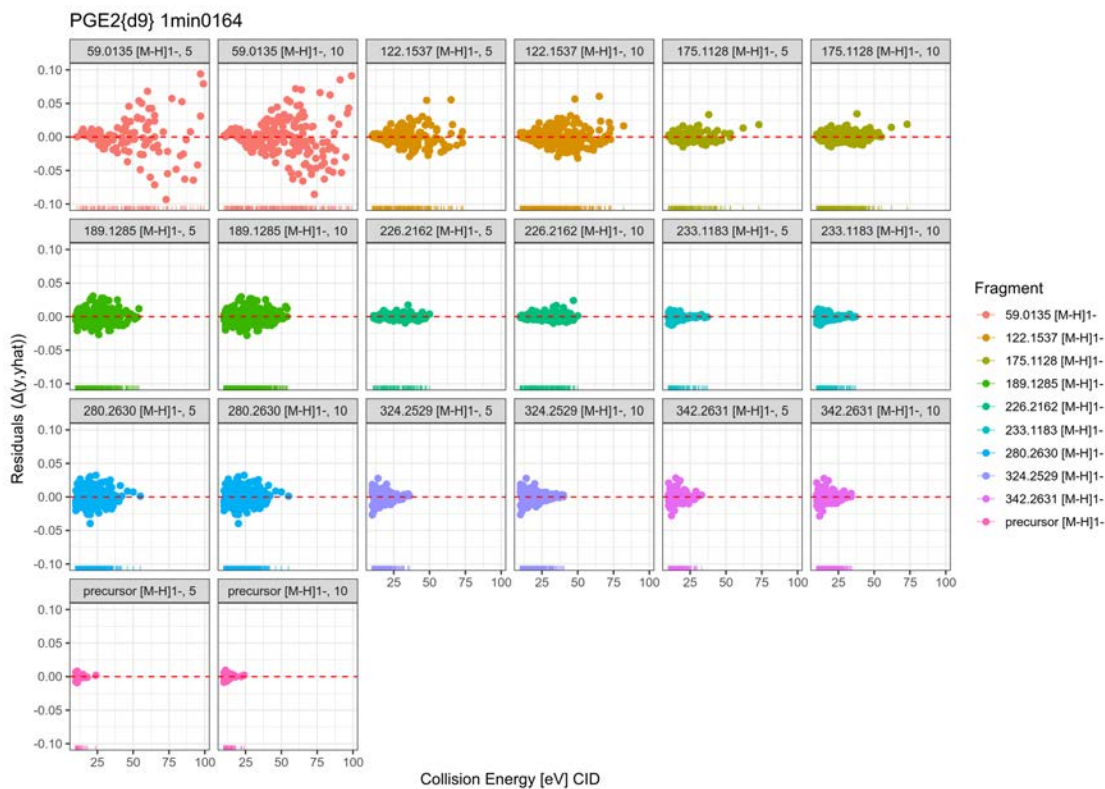

Figure 217. Residuals of nonlinear fit



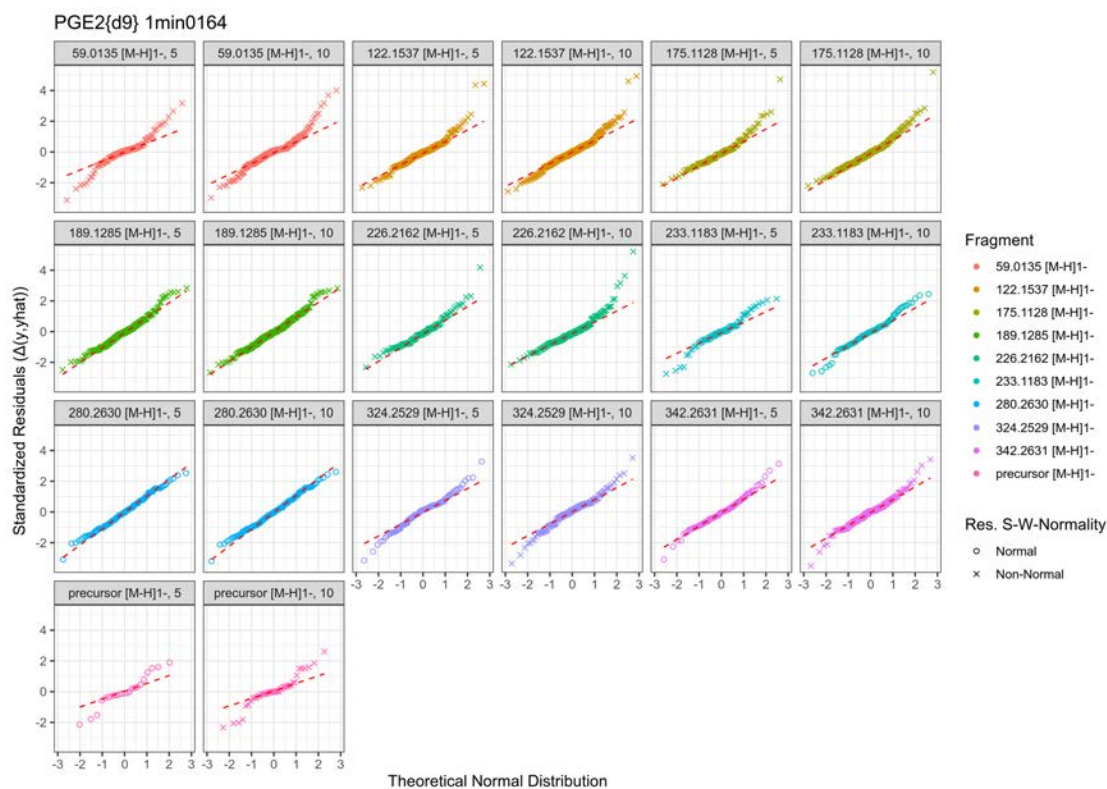

Figure 218. Quantile-quantile plot of residuals

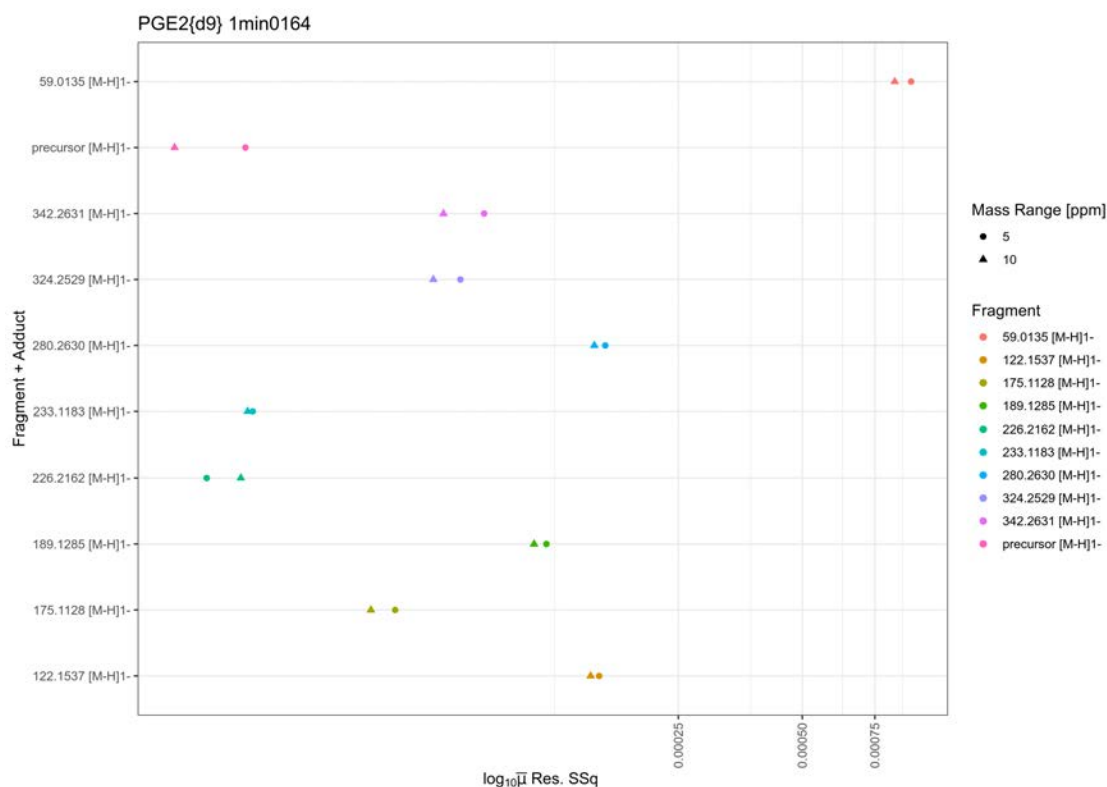

Figure 219. Normalized sum-of-squares of the residuals



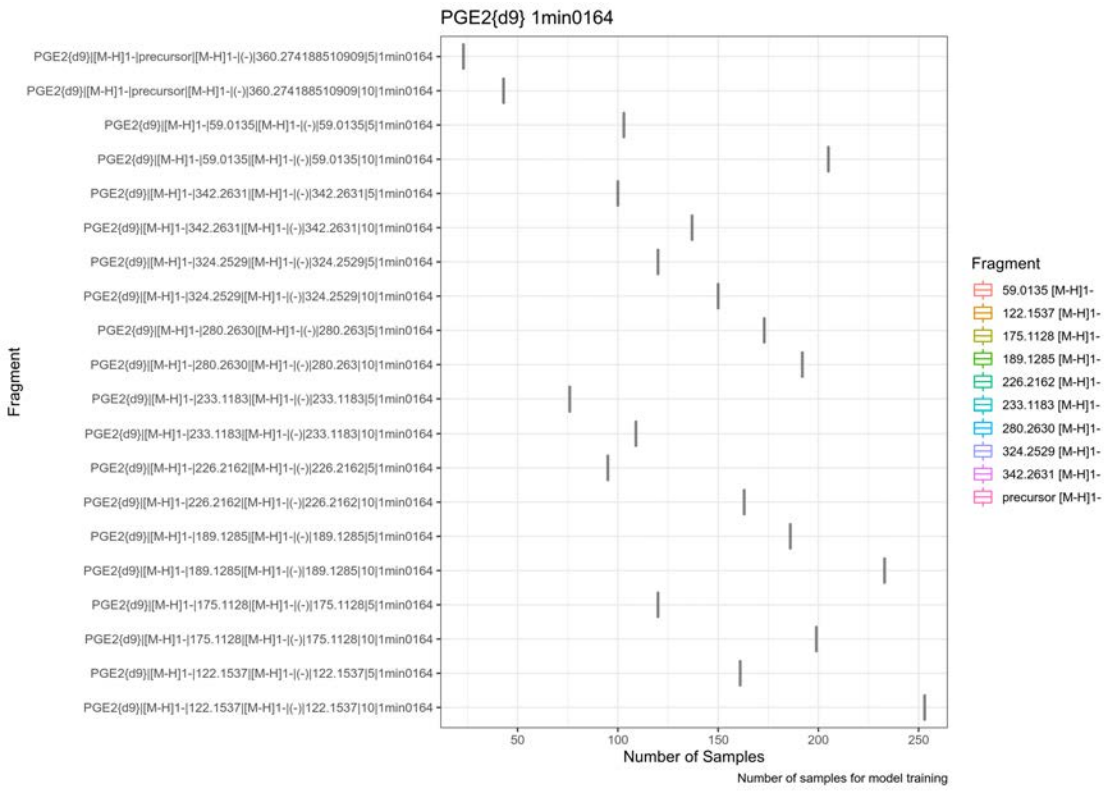

Figure 220. Number of samples used for training per combination Id

# 1.45. PGF2alpha{d4} [M-H]1- 1min0194

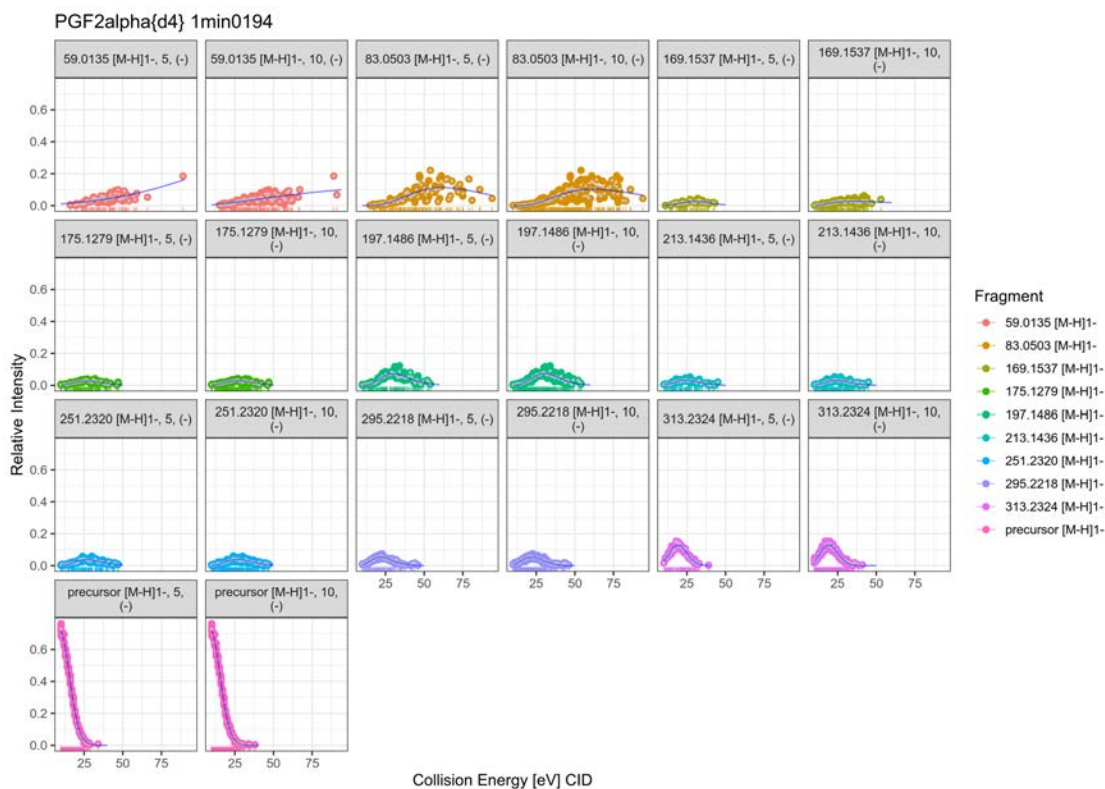

Figure 221. Nonlinear fit

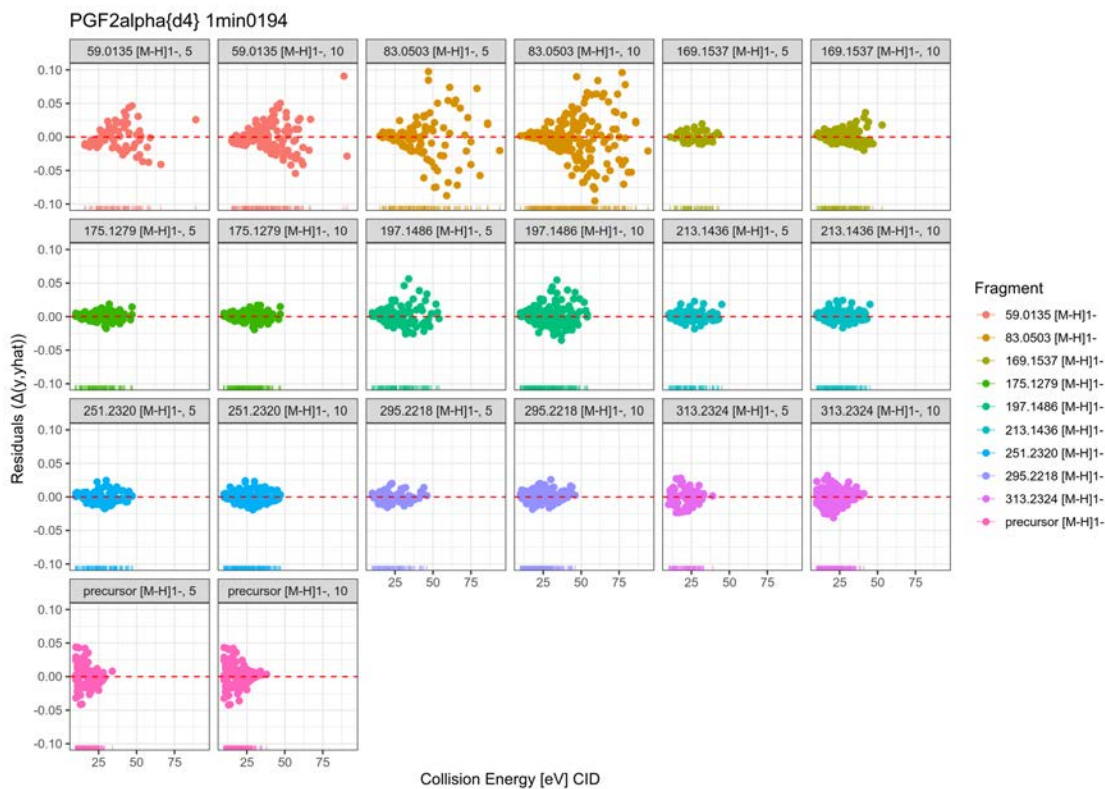

Figure 222. Residuals of nonlinear fit

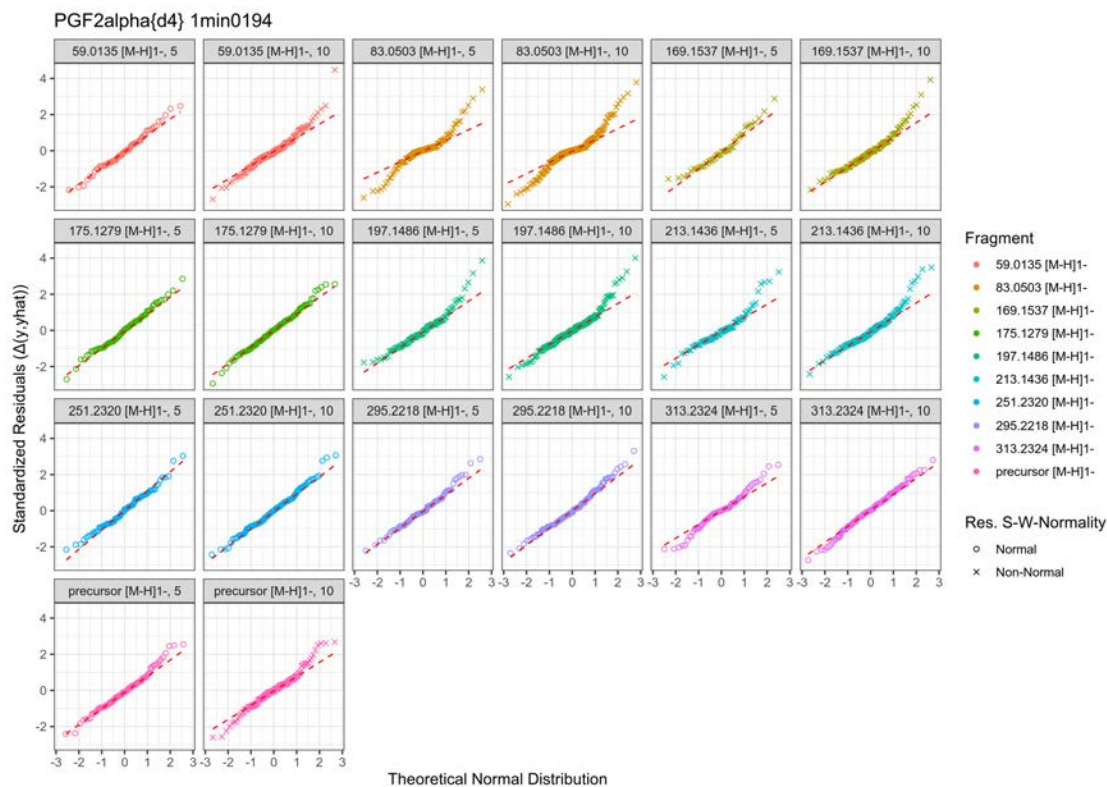

Figure 223. Quantile-quantile plot of residuals

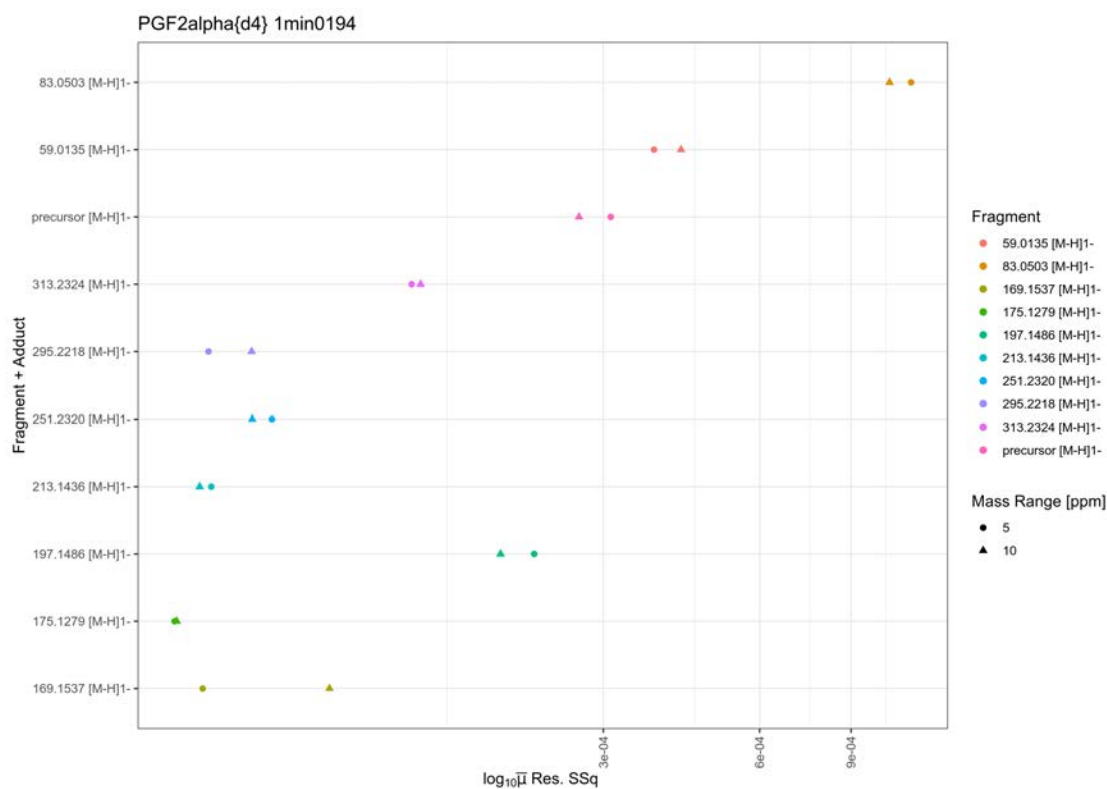

Figure 224. Normalized sum-of-squares of the residuals

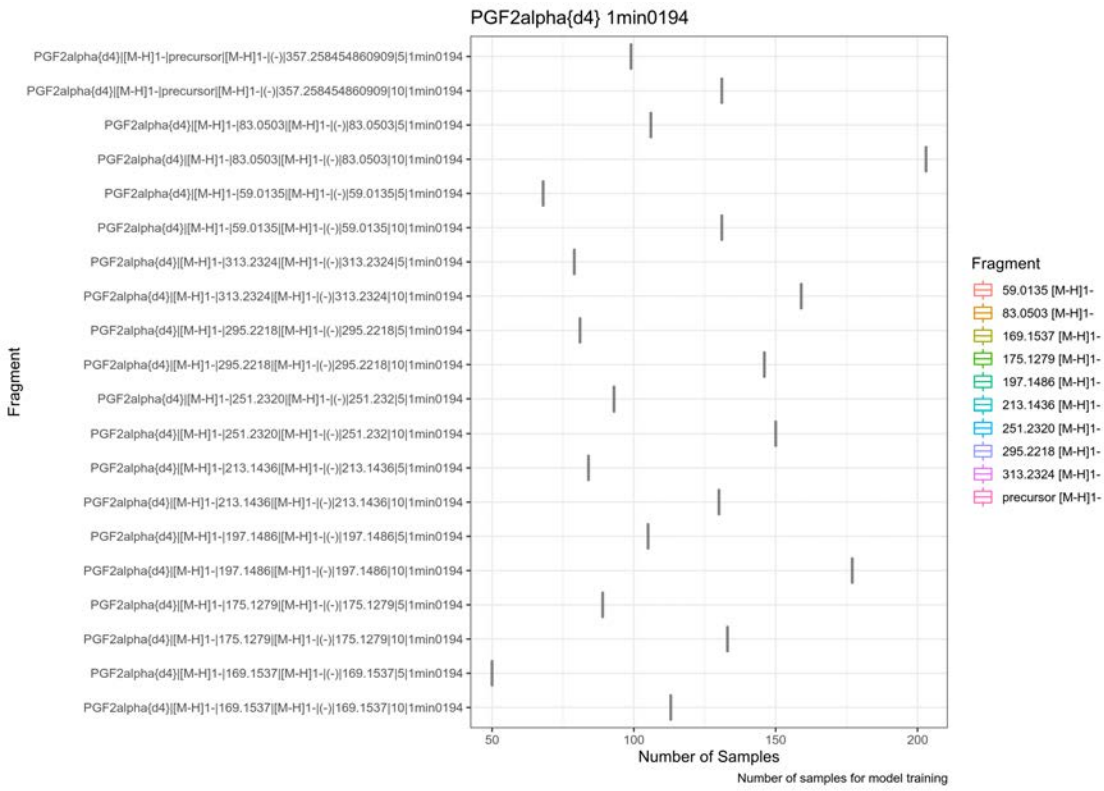

Figure 225. Number of samples used for training per combination Id

# 1.46. PGI2 [M-H]1- 1min0196

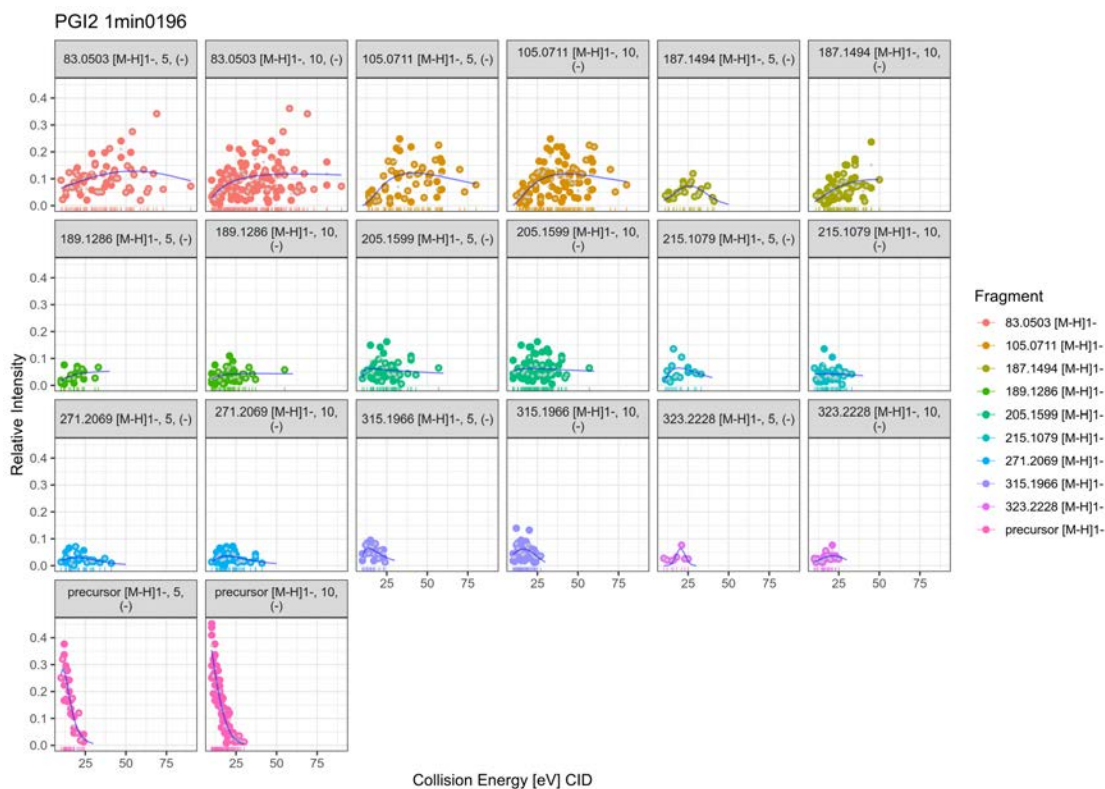

Figure 226. Nonlinear fit

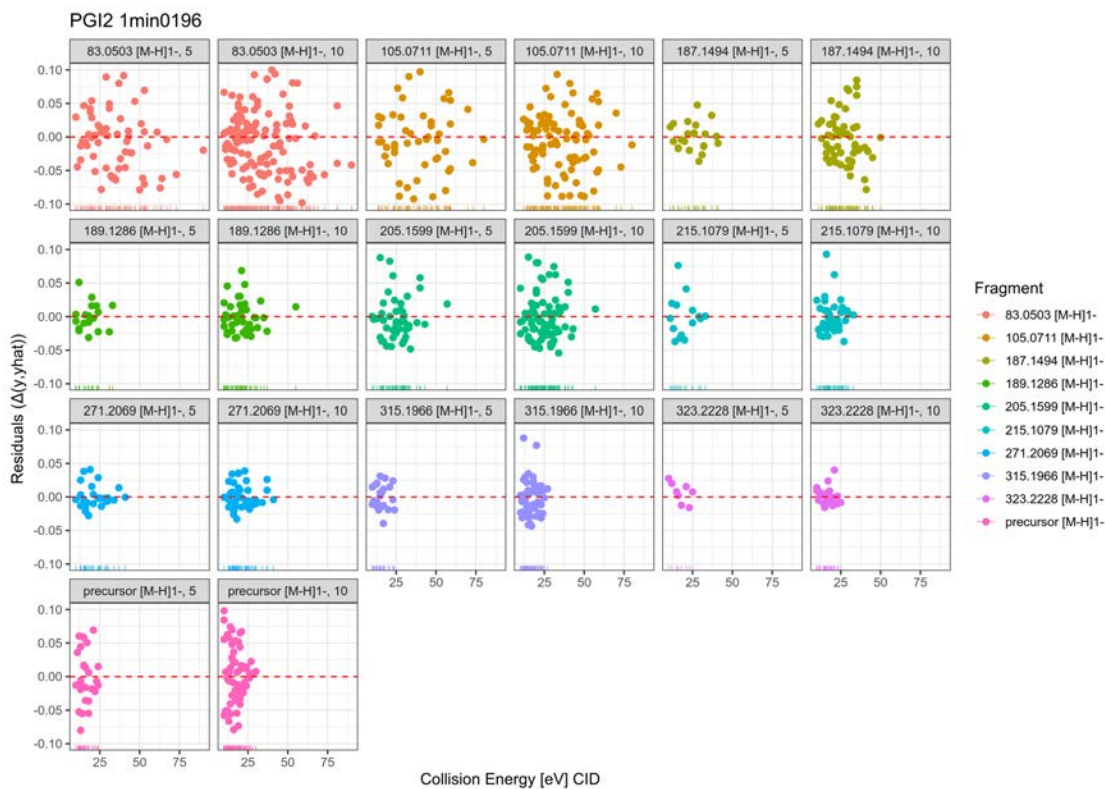

Figure 227. Residuals of nonlinear fit



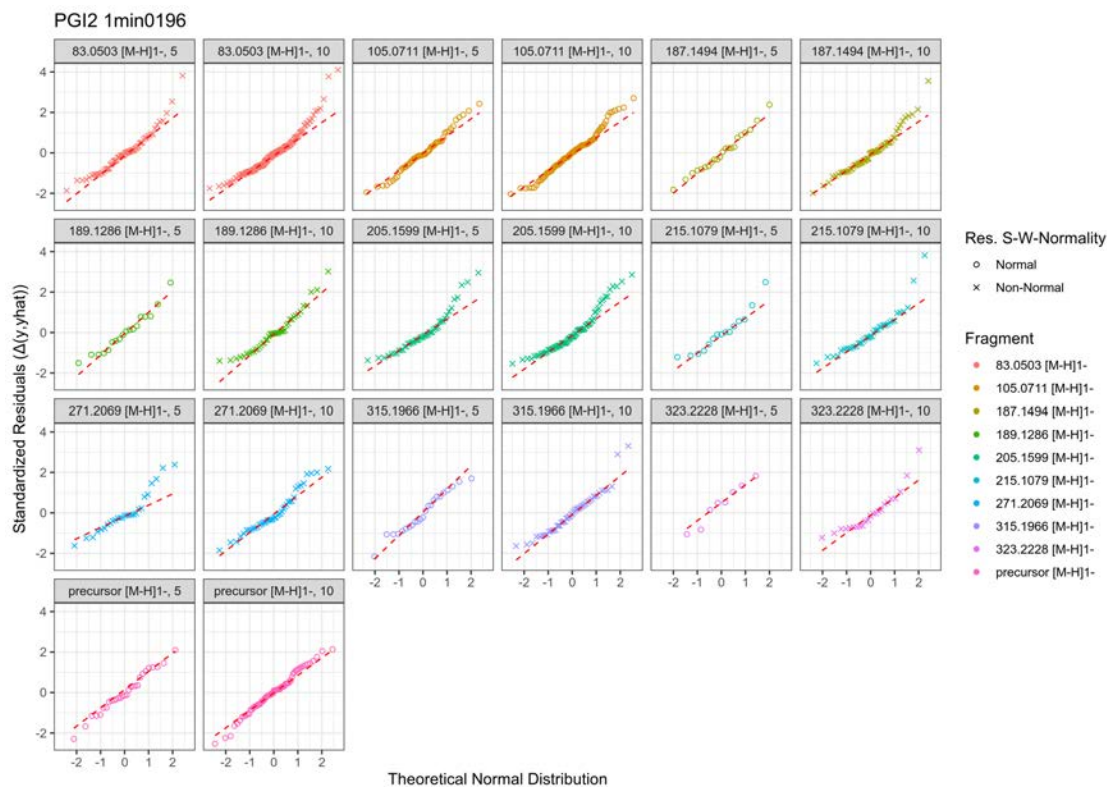

Figure 228. Quantile-quantile plot of residuals

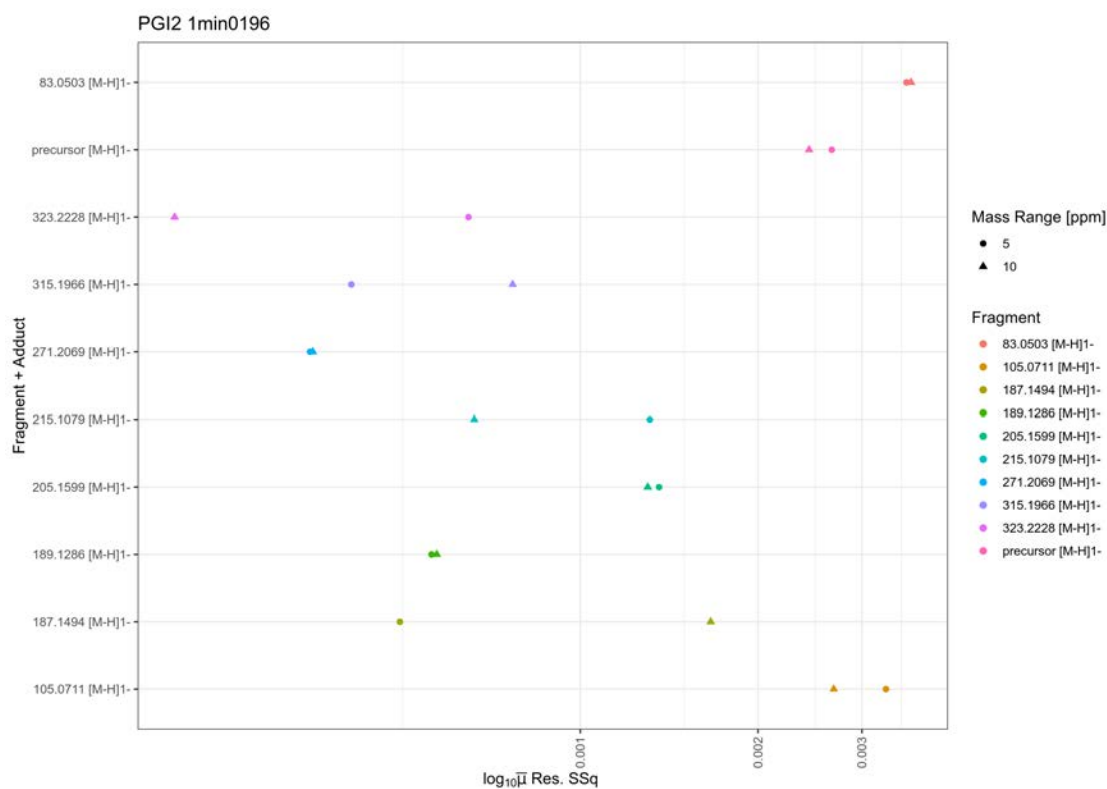

Figure 229. Normalized sum-of-squares of the residuals

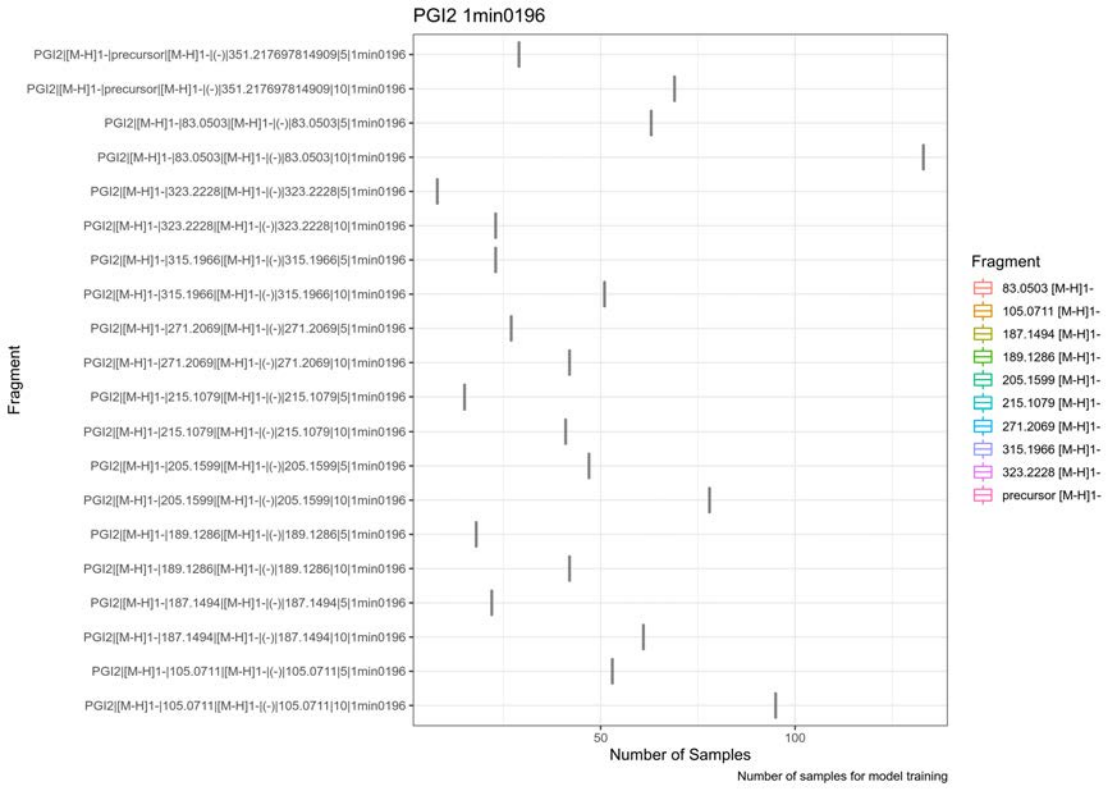

Figure 230. Number of samples used for training per combination Id

# 1.47. Resolvin D1{d5} [M-H]1- 1min0152

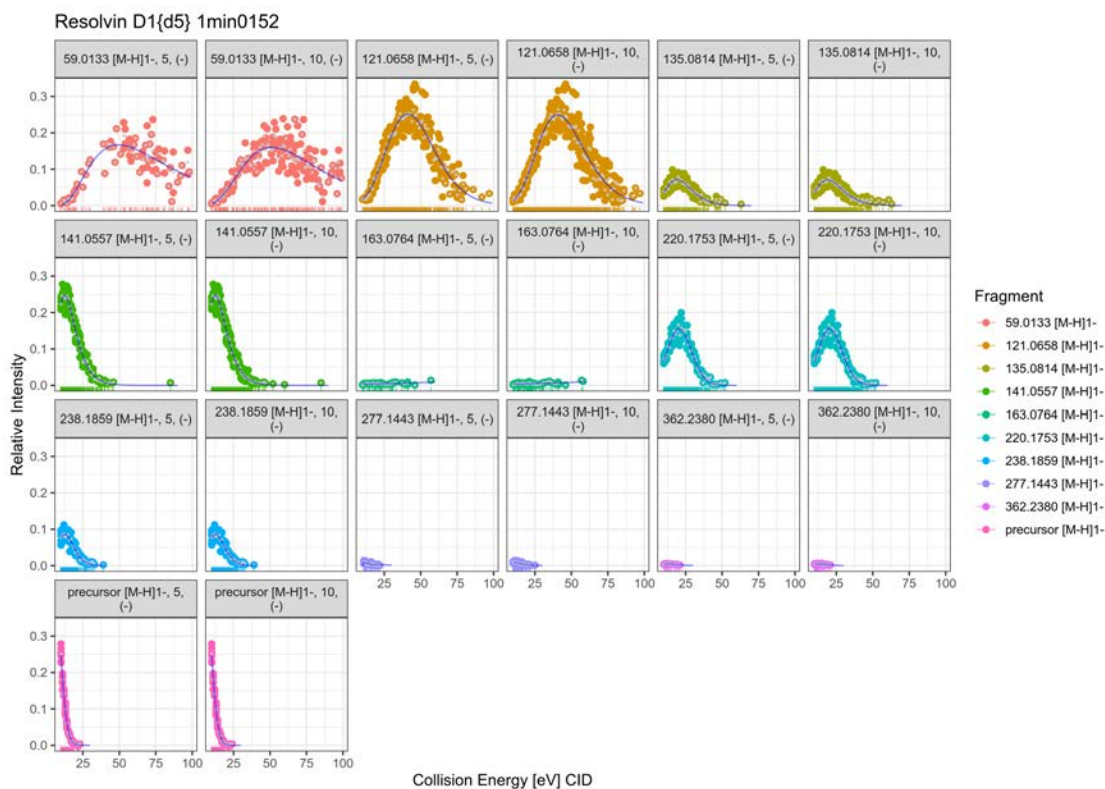

Figure 231. Nonlinear fit

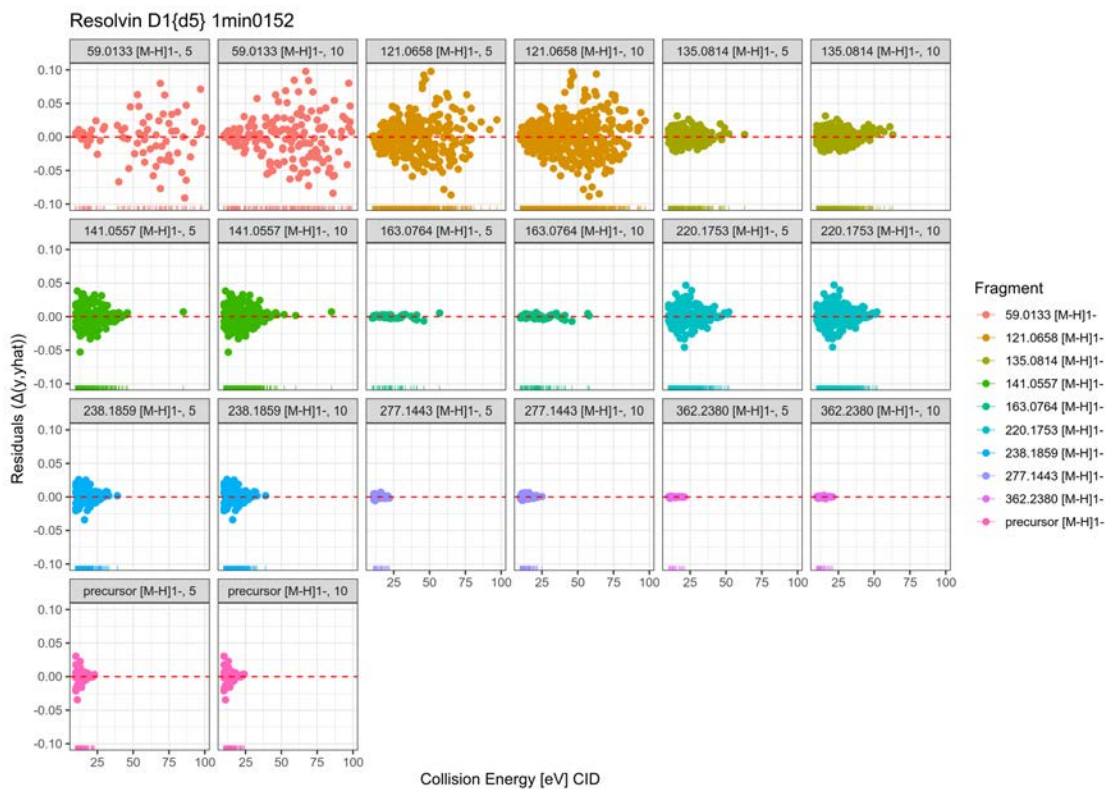

Figure 232. Residuals of nonlinear fit

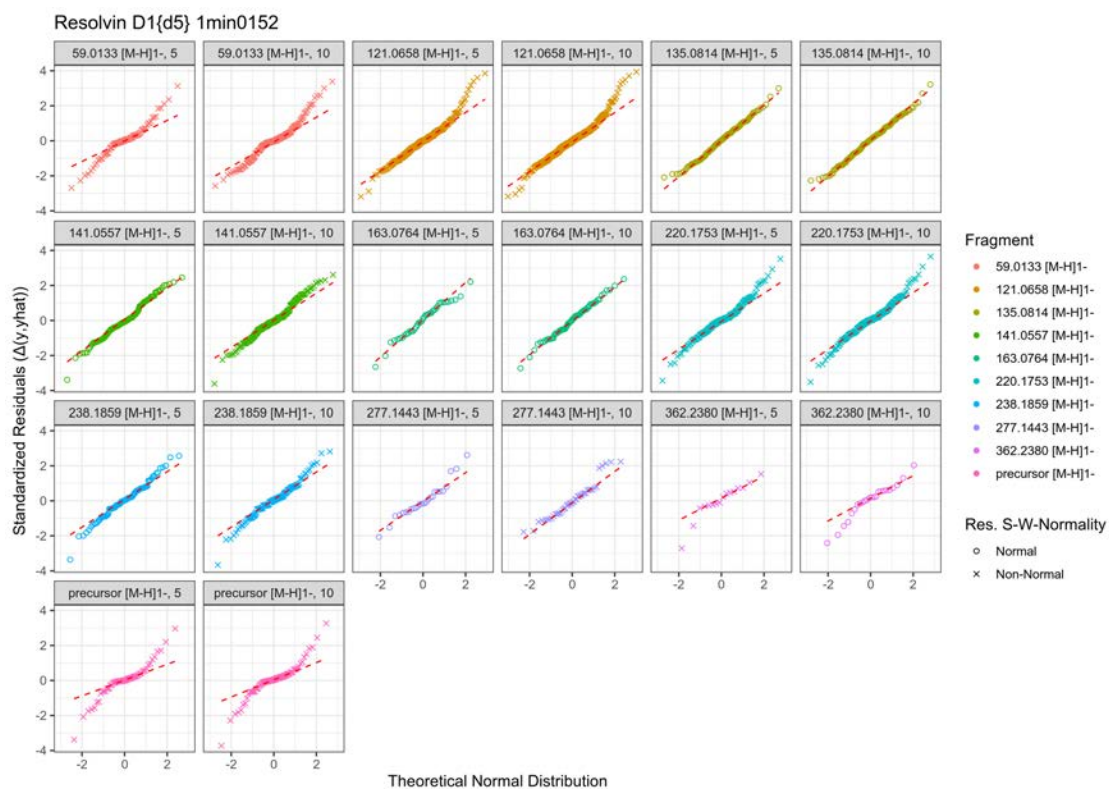

Figure 233. Quantile-quantile plot of residuals

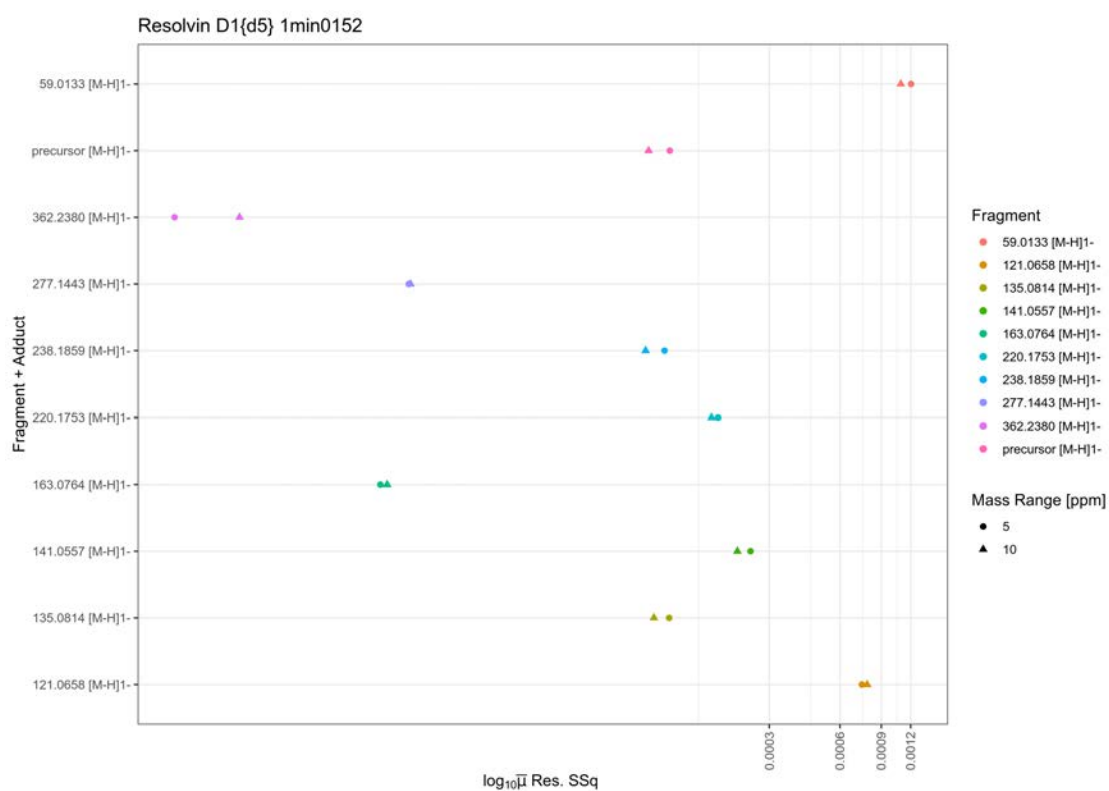

Figure 234. Normalized sum-of-squares of the residuals

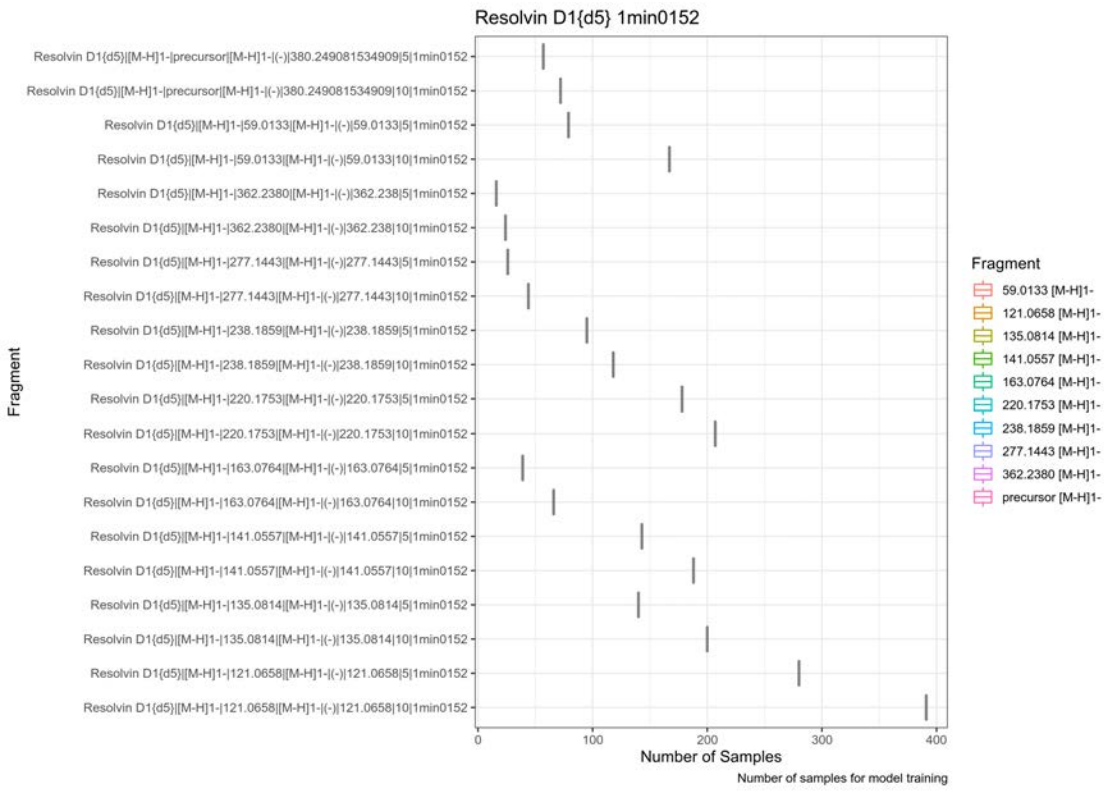

Figure 235. Number of samples used for training per combination Id



# 1.48. Resolvin D2{d5} [M-H]1- 1min0197

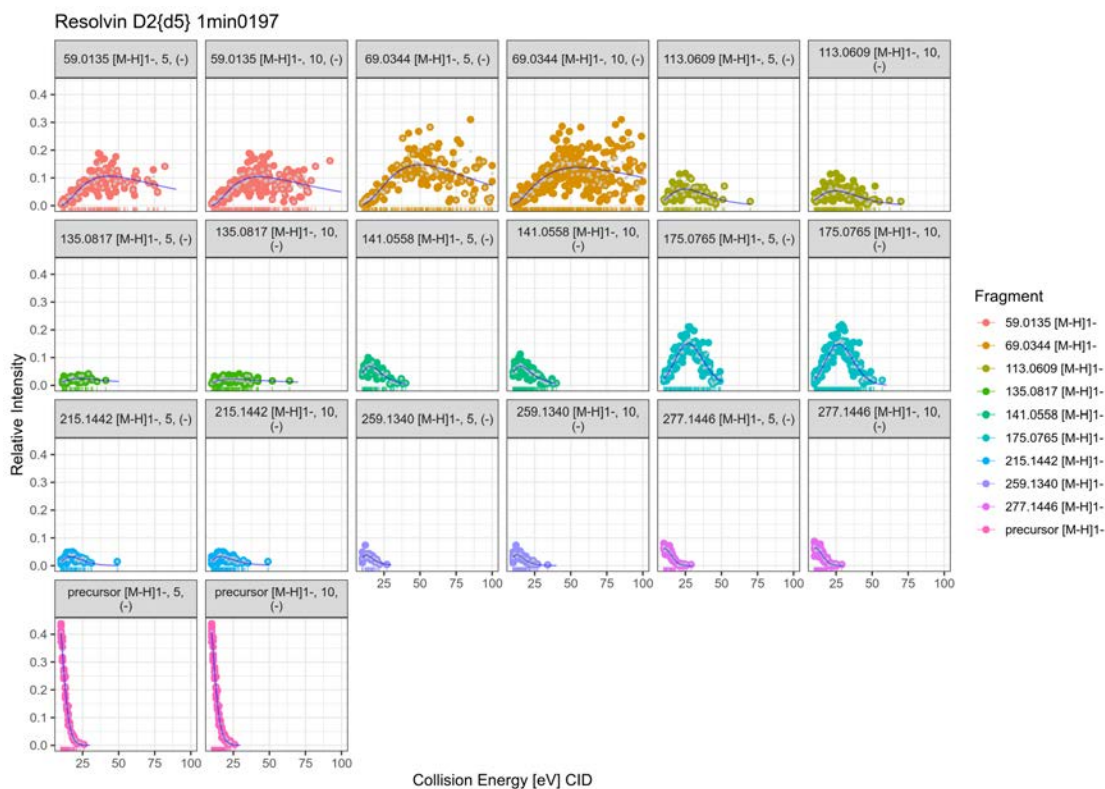

Figure 236. Nonlinear fit

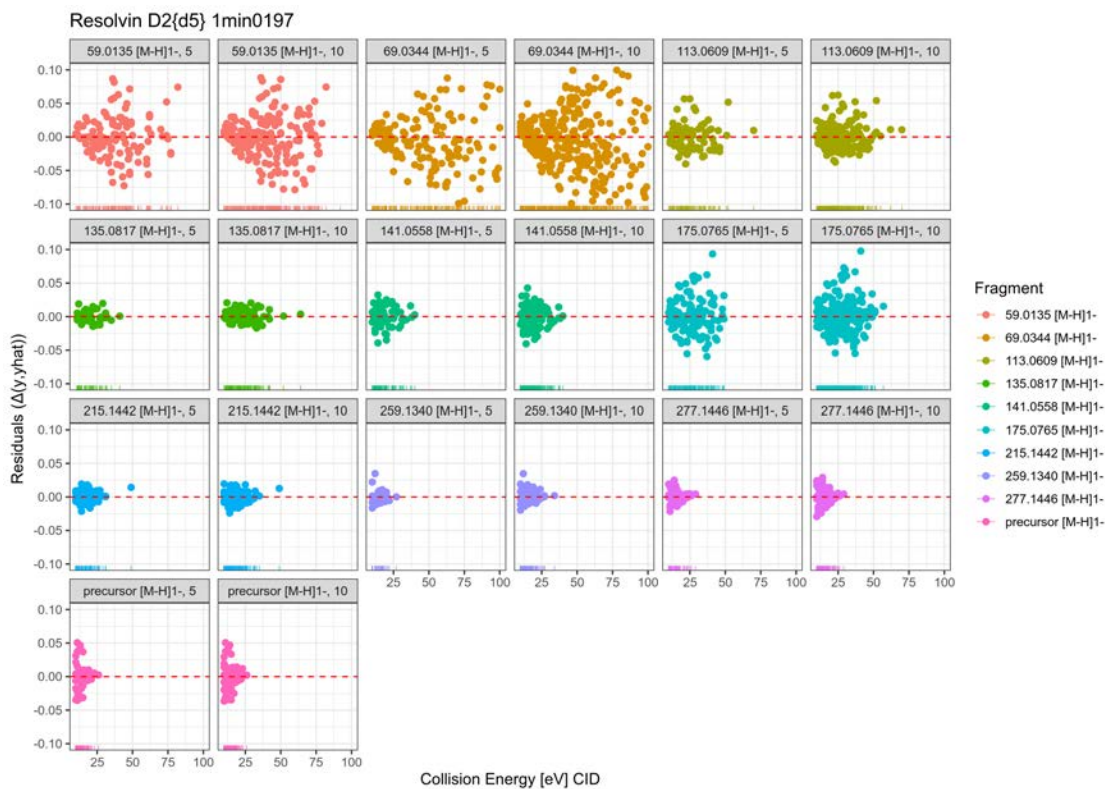

Figure 237. Residuals of nonlinear fit

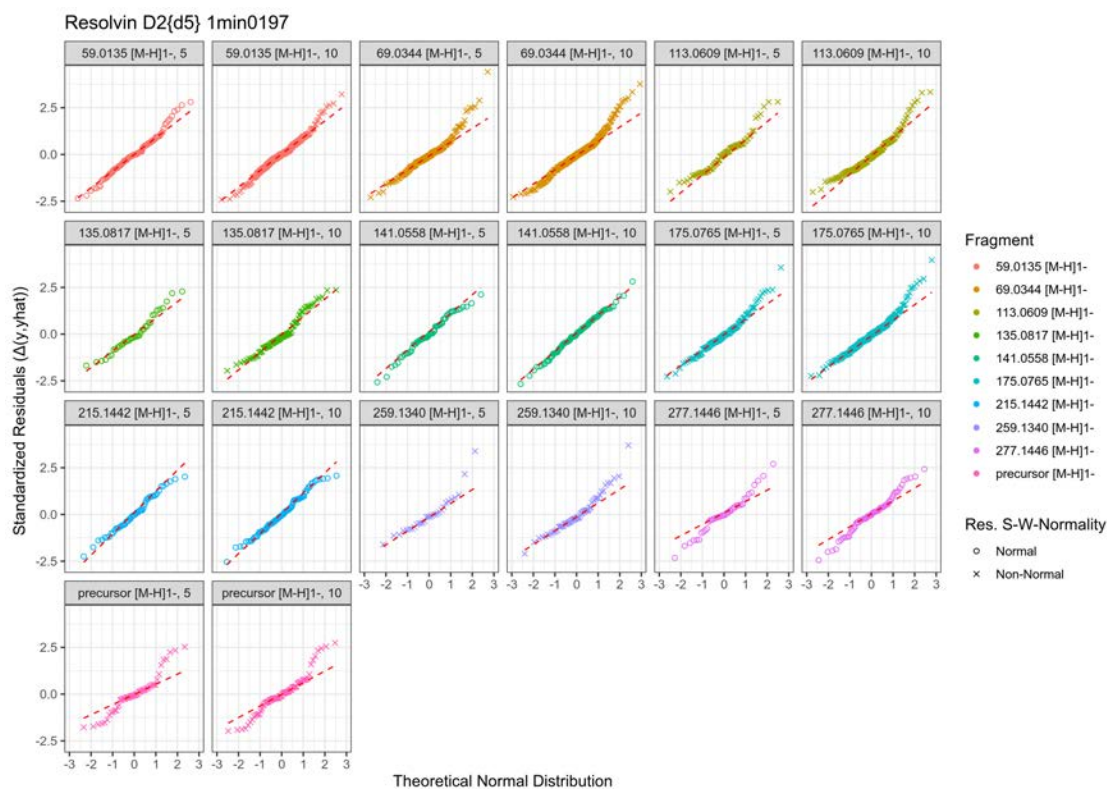

Figure 238. Quantile-quantile plot of residuals

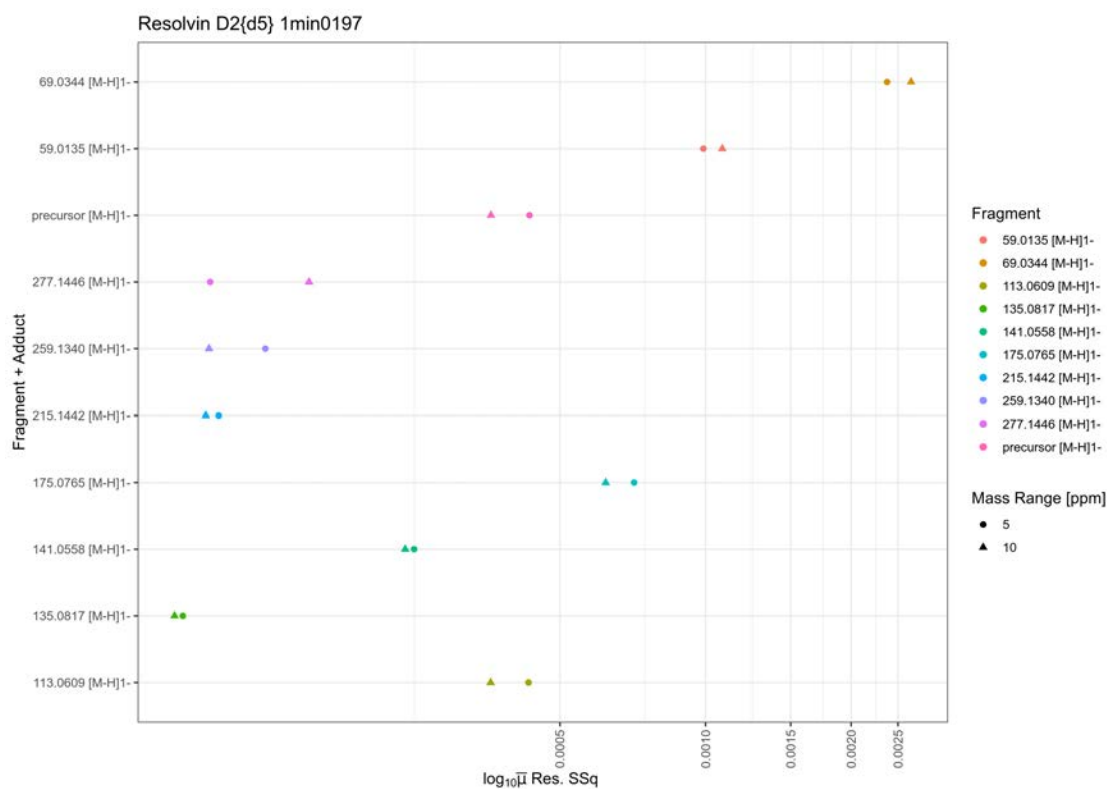

Figure 239. Normalized sum-of-squares of the residuals

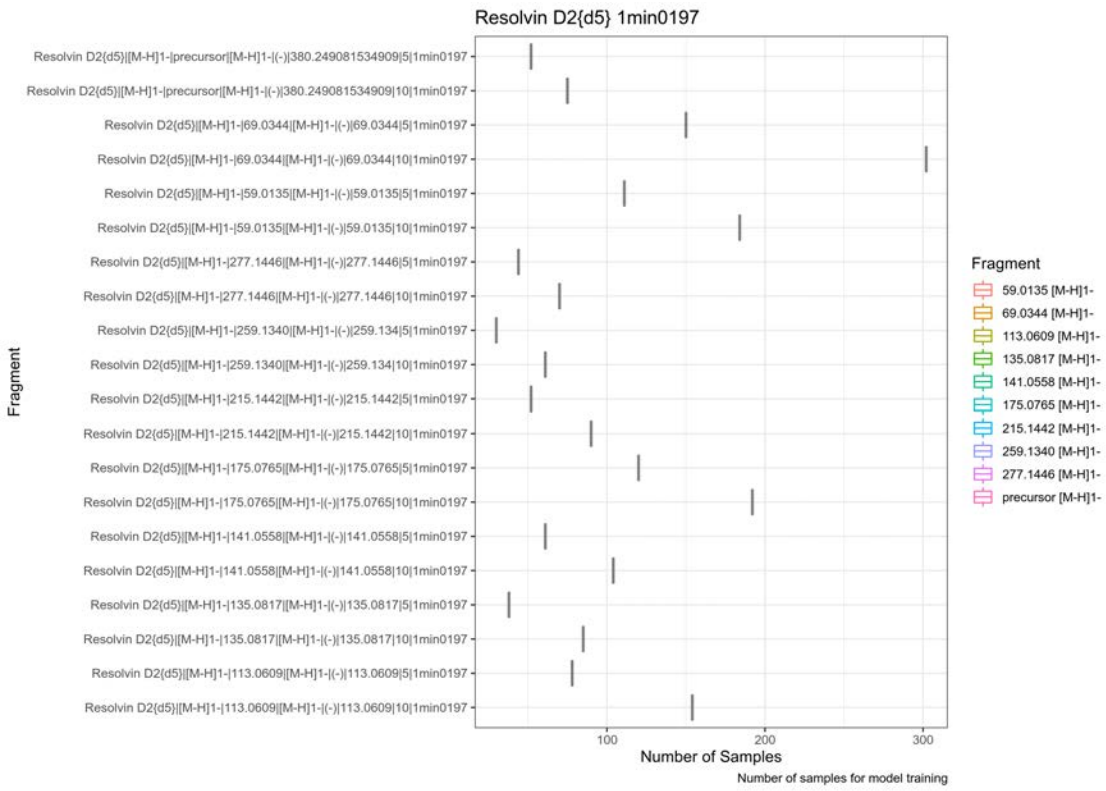

Figure 240. Number of samples used for training per combination Id

# 1.49. Resolvin D3 [M-H]1- 1min0210

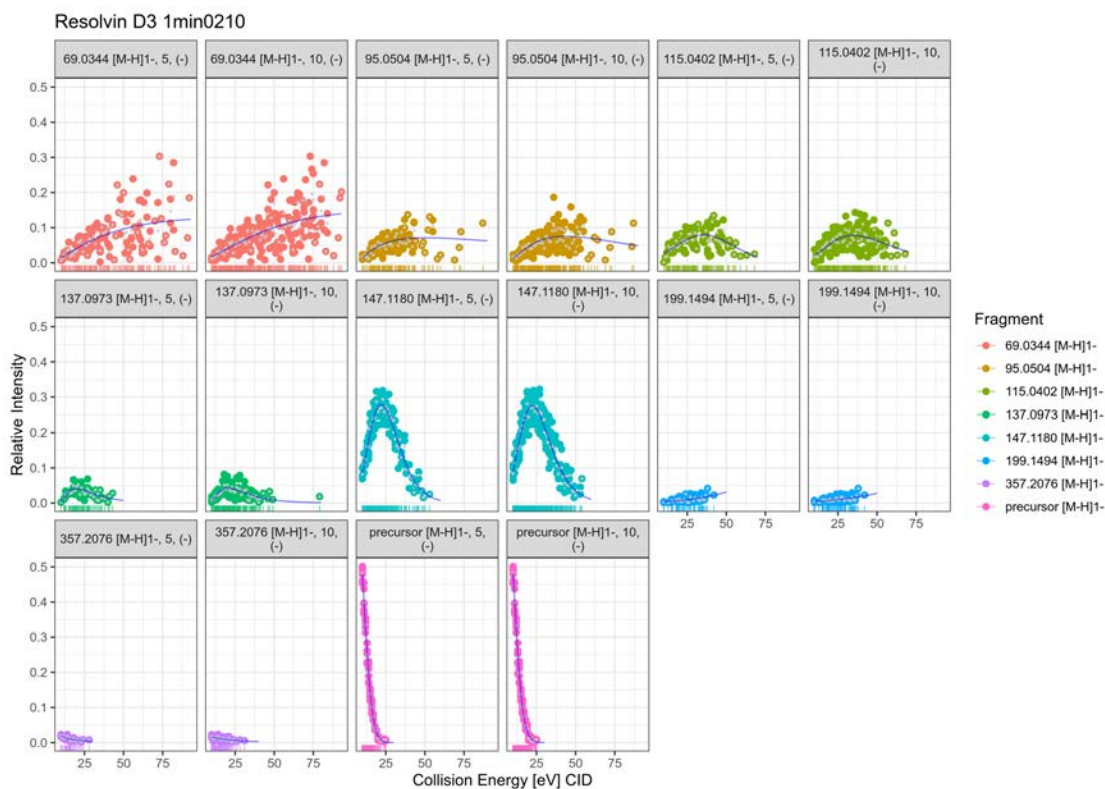

Figure 241. Nonlinear fit

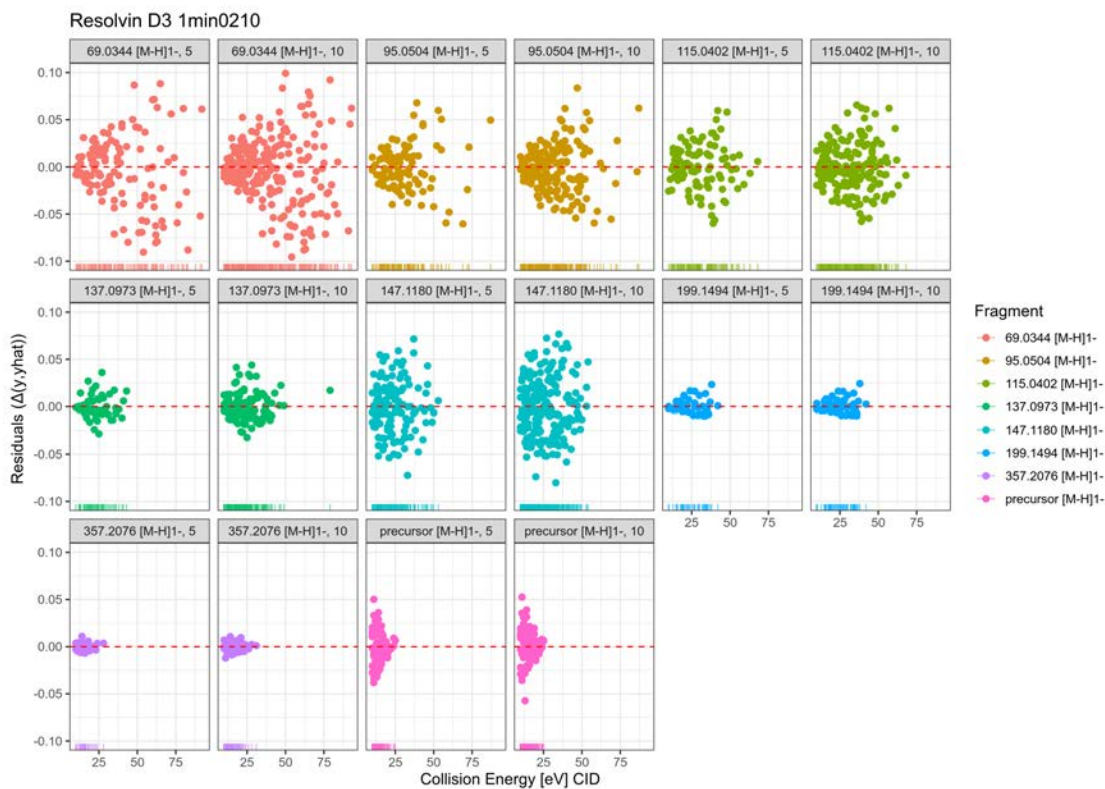

Figure 242. Residuals of nonlinear fit



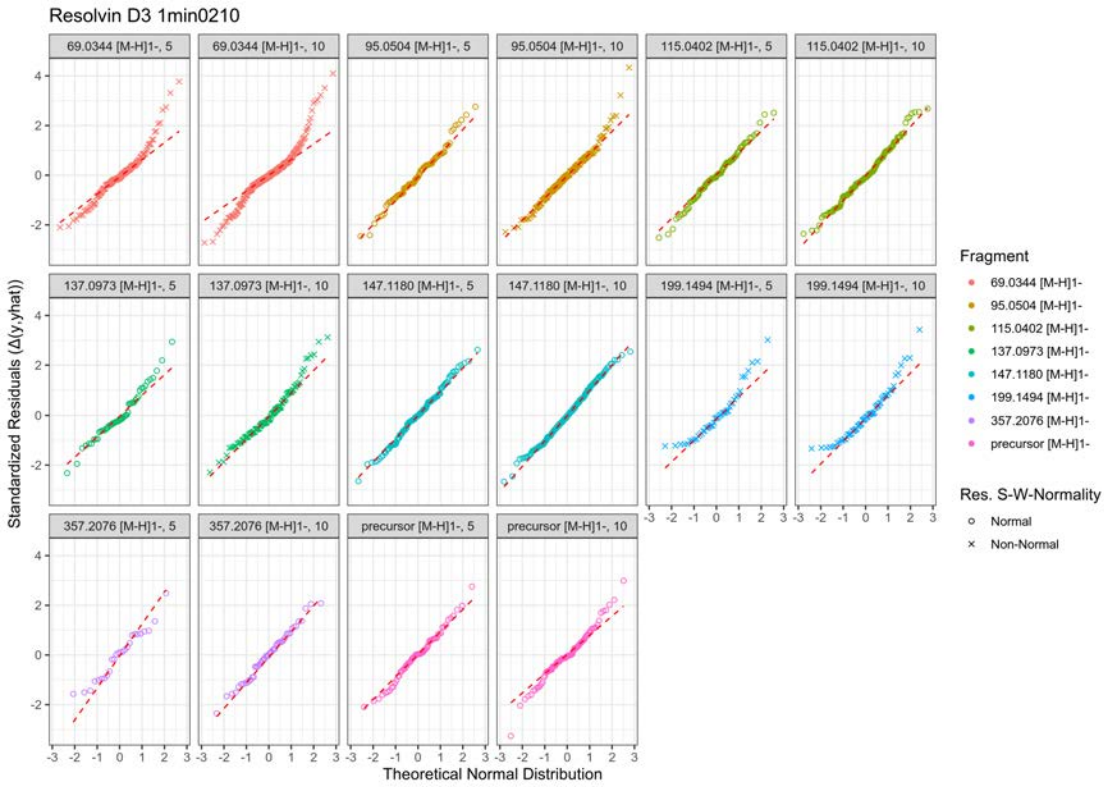

Figure 243. Quantile-quantile plot of residuals

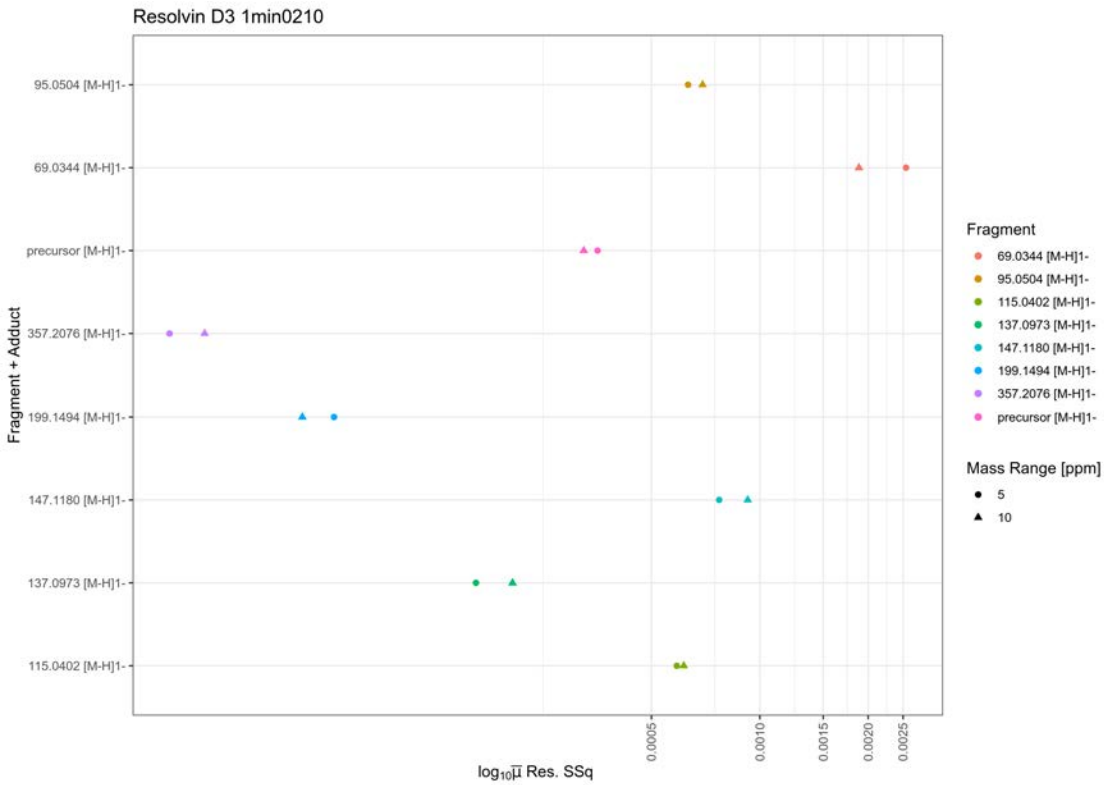

Figure 244. Normalized sum-of-squares of the residuals



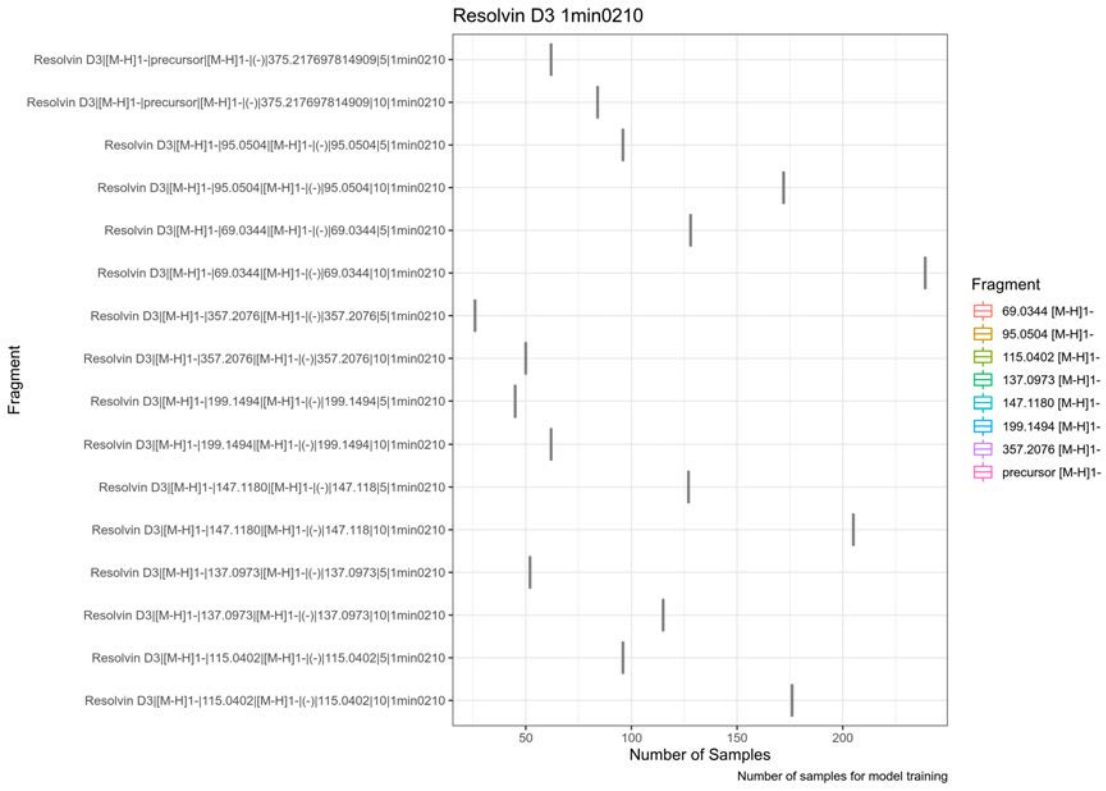

Figure 245. Number of samples used for training per combination Id

# 1.50. Resolvin D5 [M-H]1- 1min0212

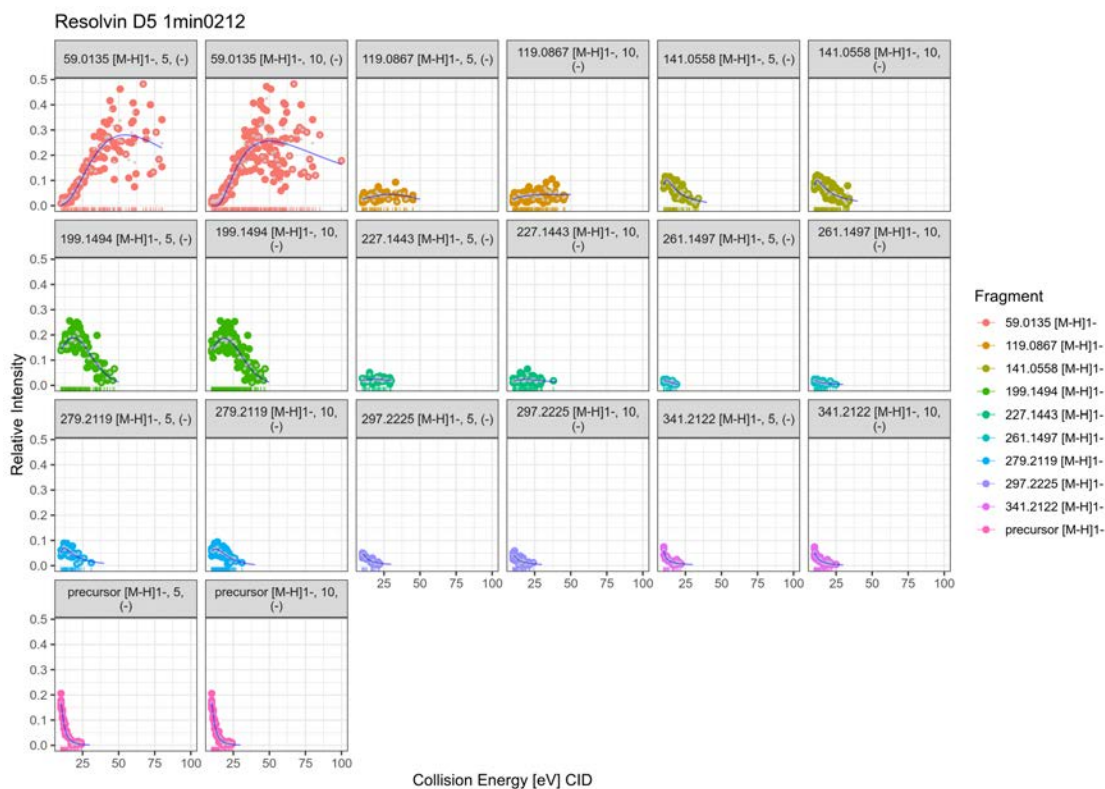

Figure 246. Nonlinear fit

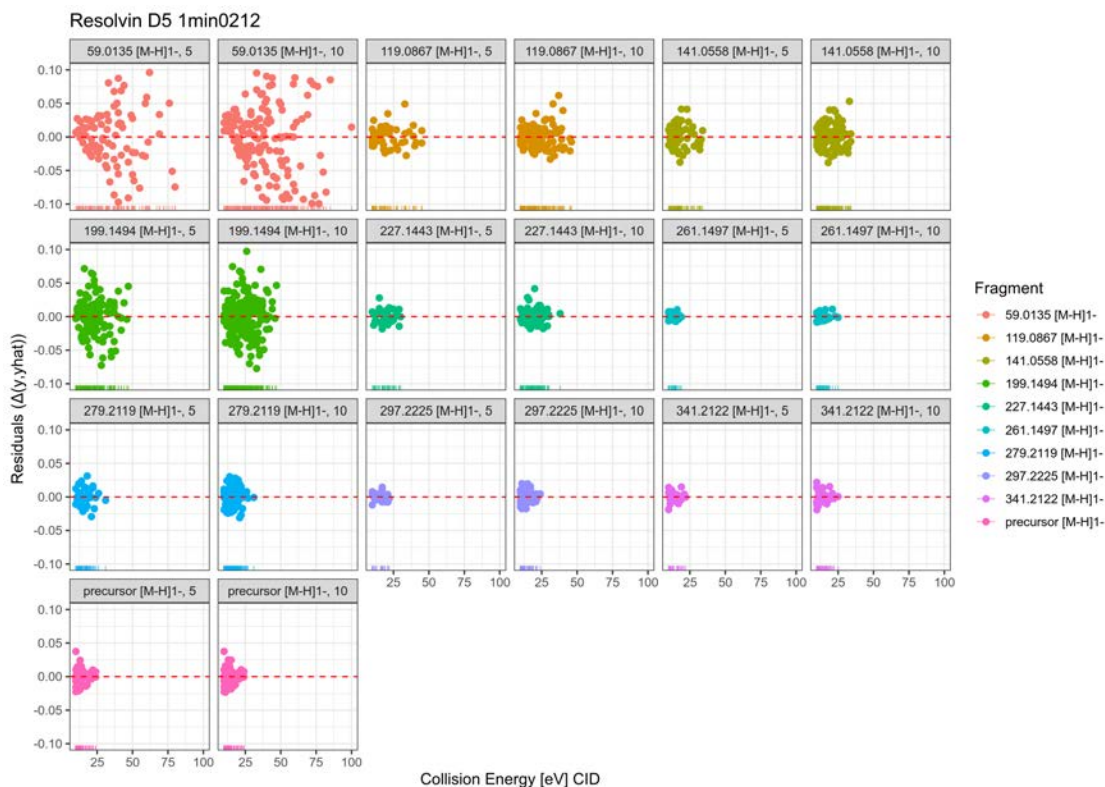

Figure 247. Residuals of nonlinear fit

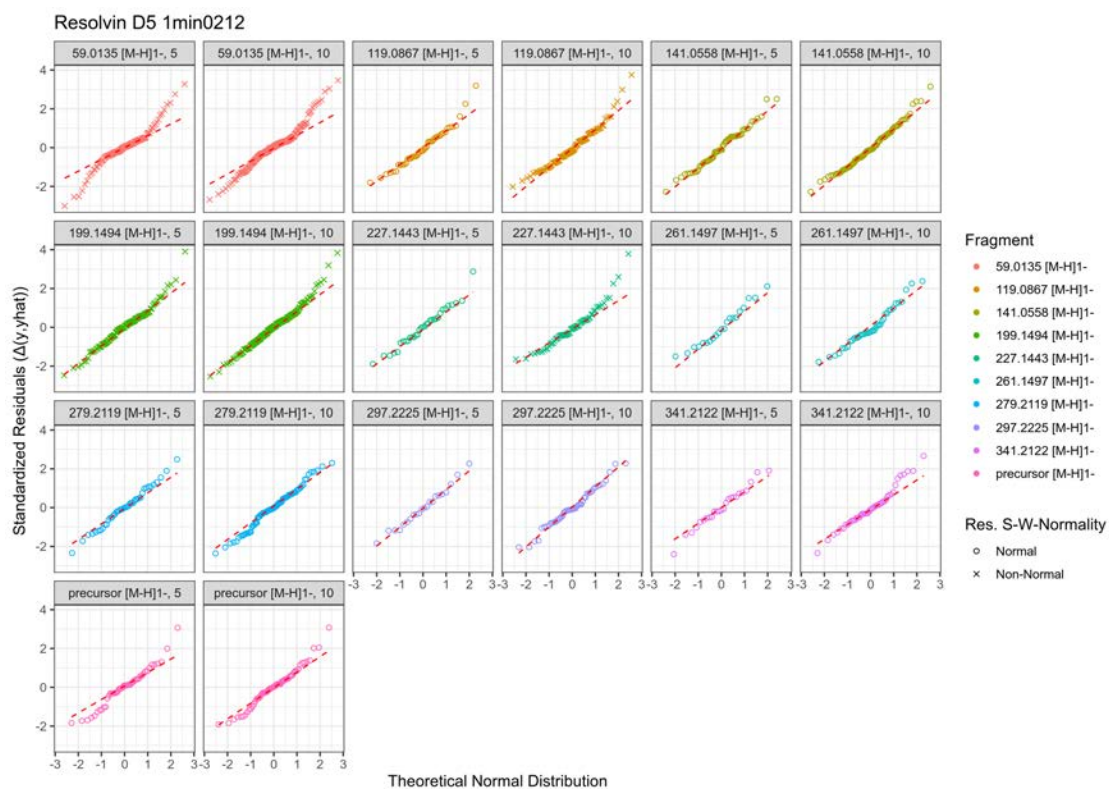

Figure 248. Quantile-quantile plot of residuals

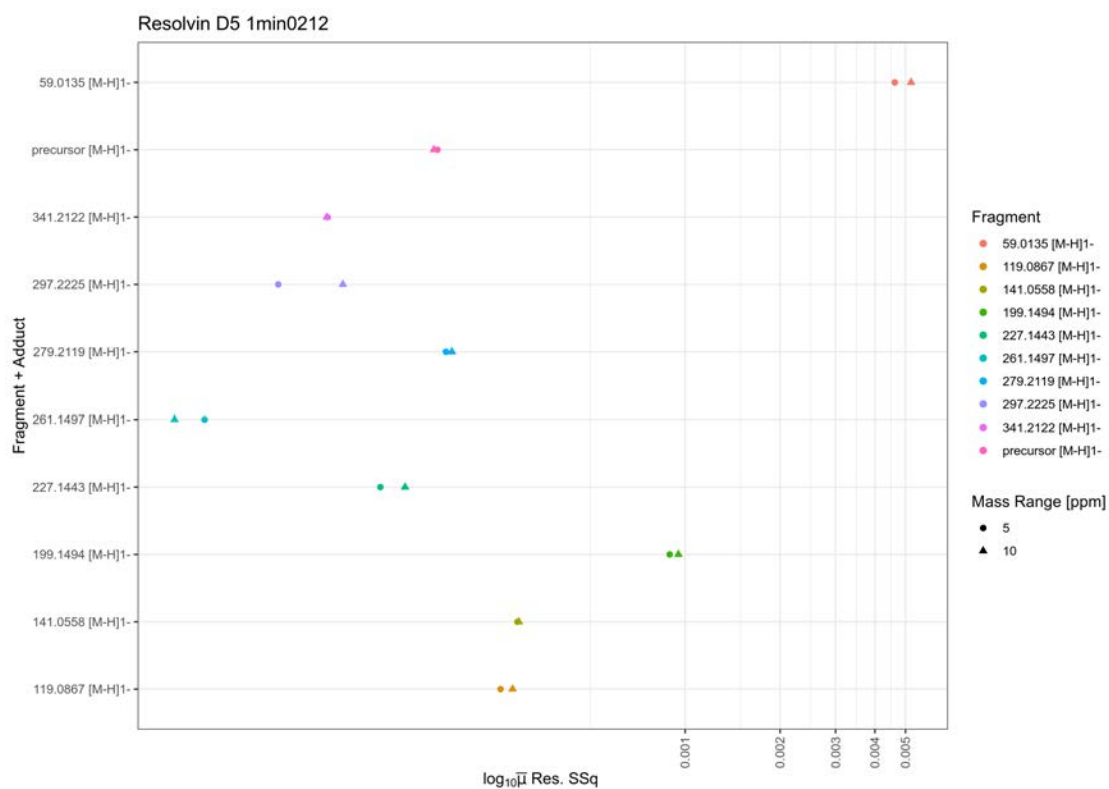

Figure 249. Normalized sum-of-squares of the residuals

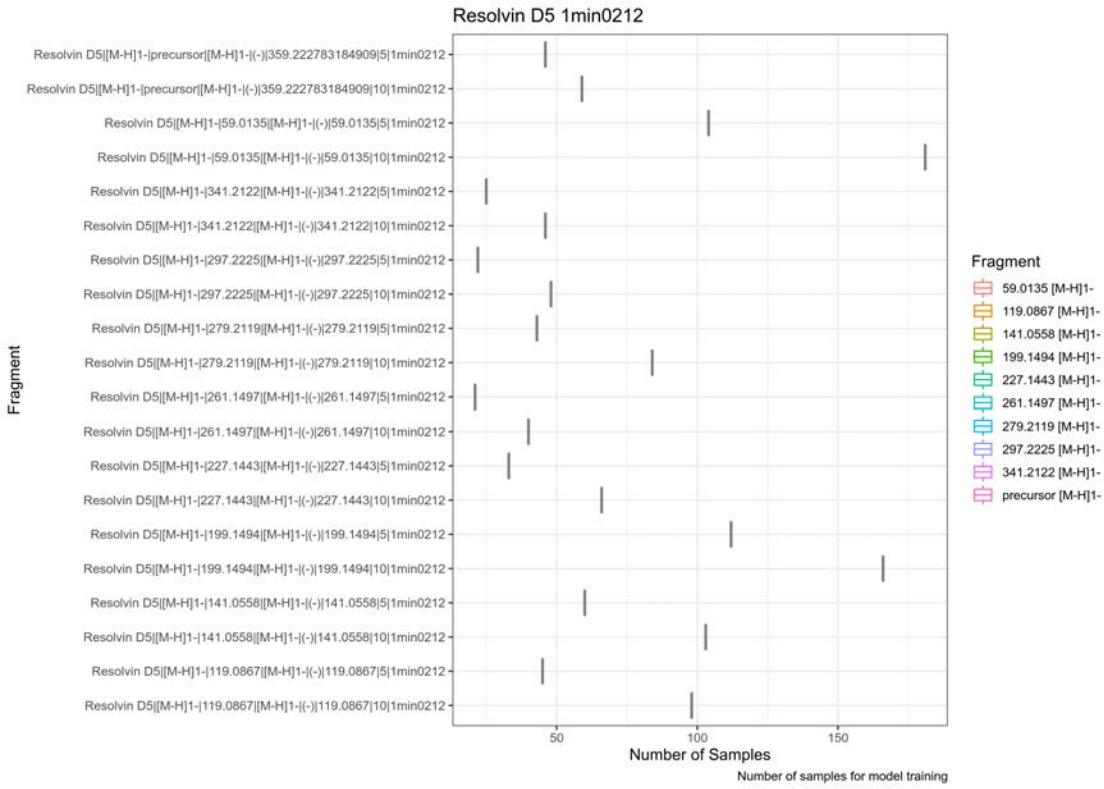

Figure 250. Number of samples used for training per combination Id

# 1.51. TXB1 [M-H]1- 1min0155

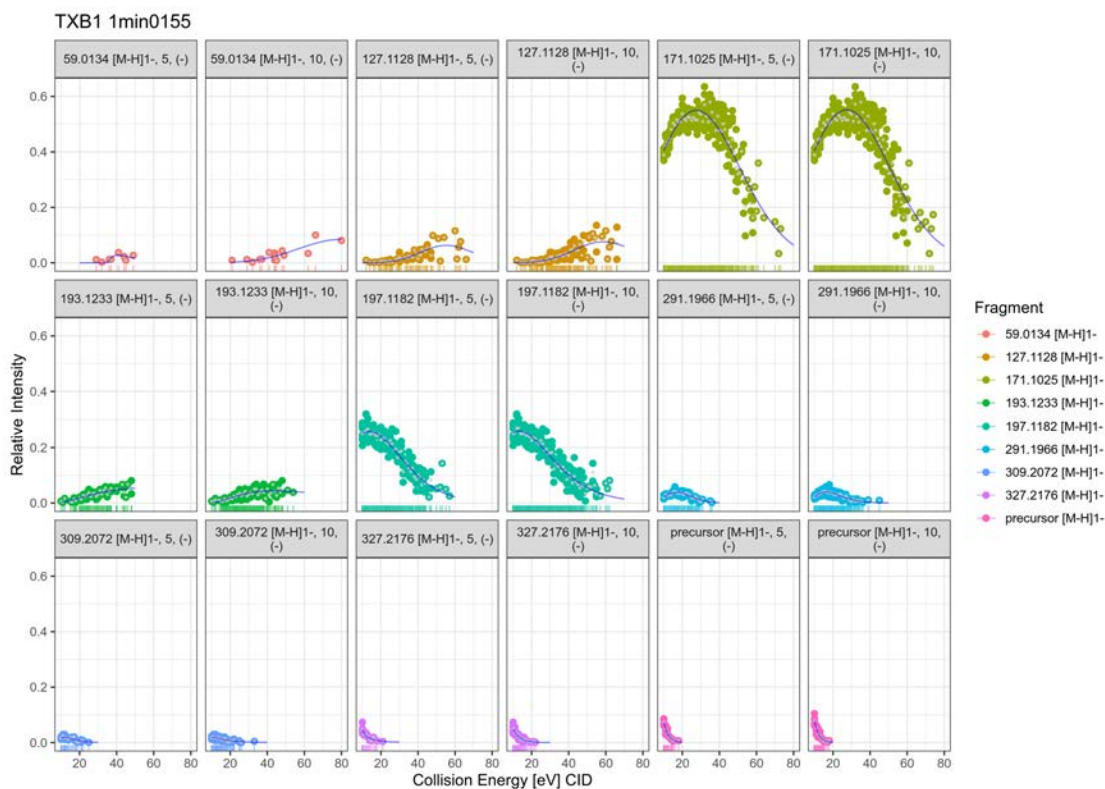

Figure 251. Nonlinear fit

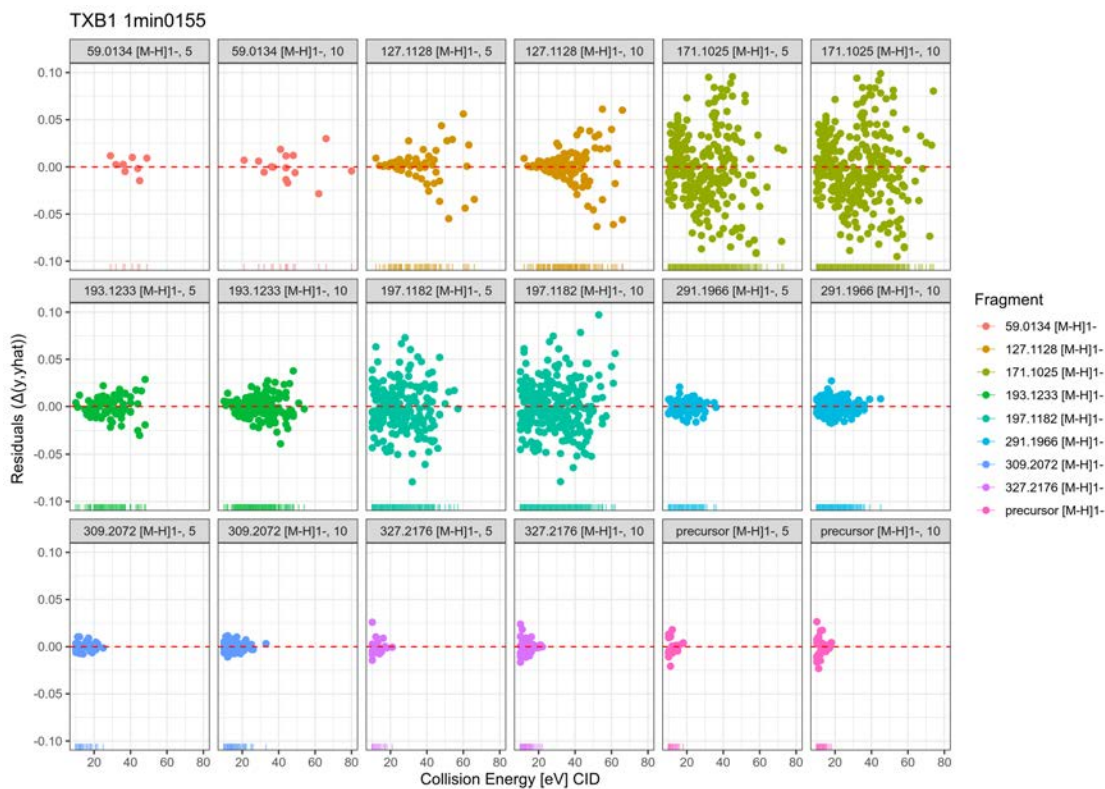

Figure 252. Residuals of nonlinear fit



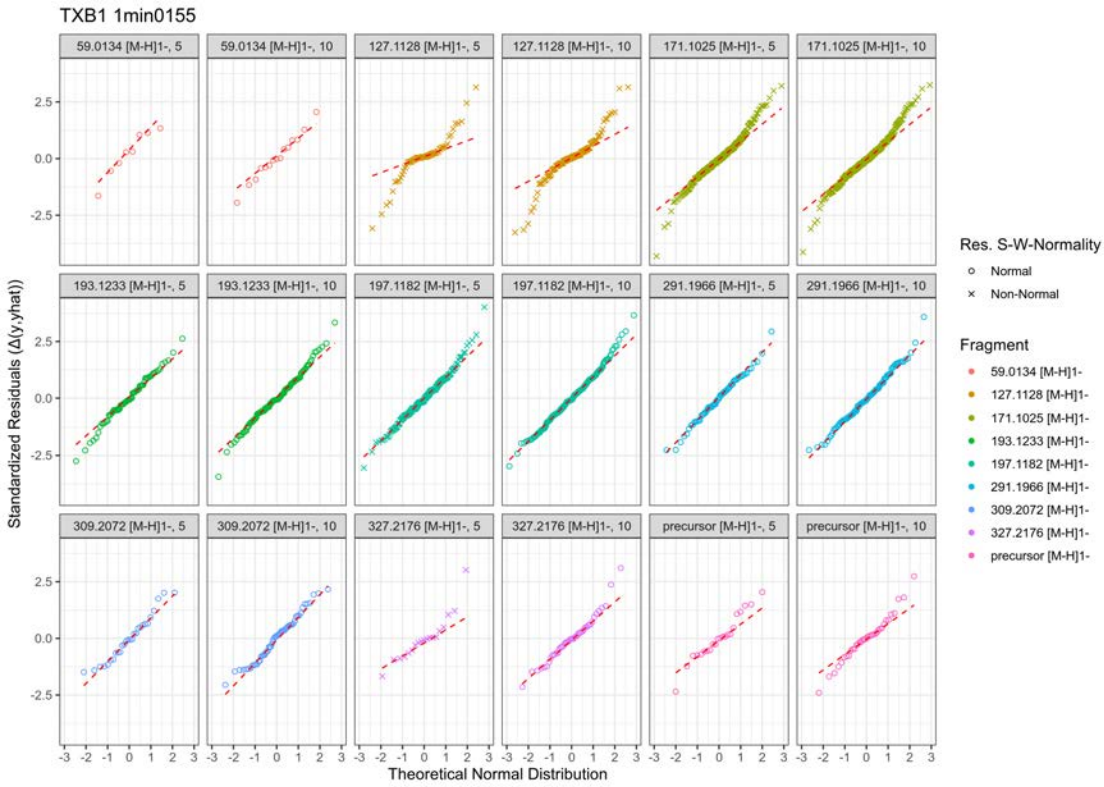

Figure 253. Quantile-quantile plot of residuals

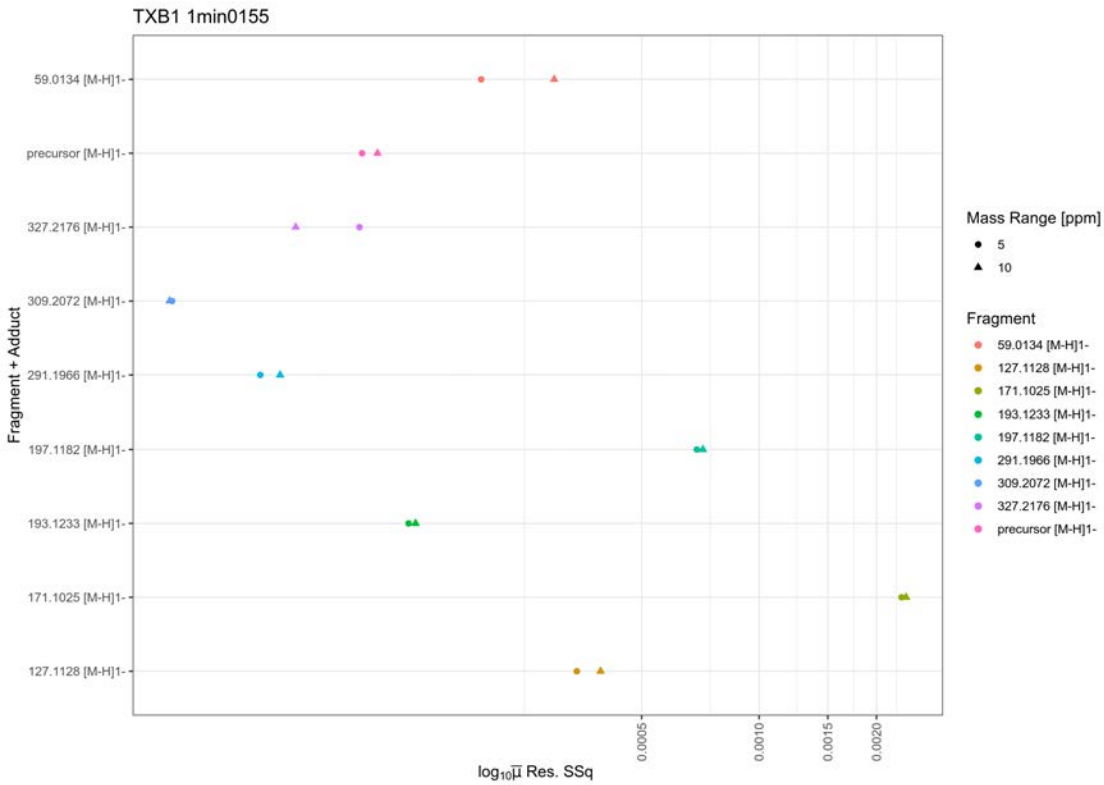

Figure 254. Normalized sum-of-squares of the residuals

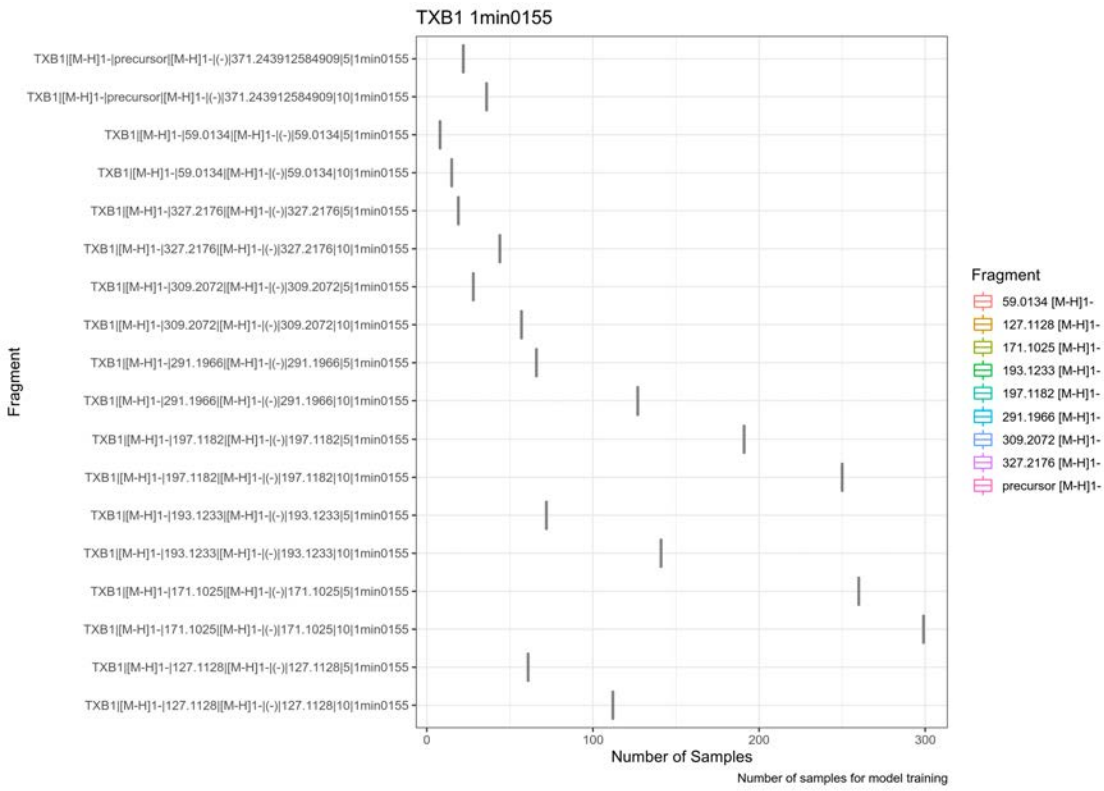

Figure 255. Number of samples used for training per combination Id

## 1.52. TXB2{d4} [M-H]1- 1min0071

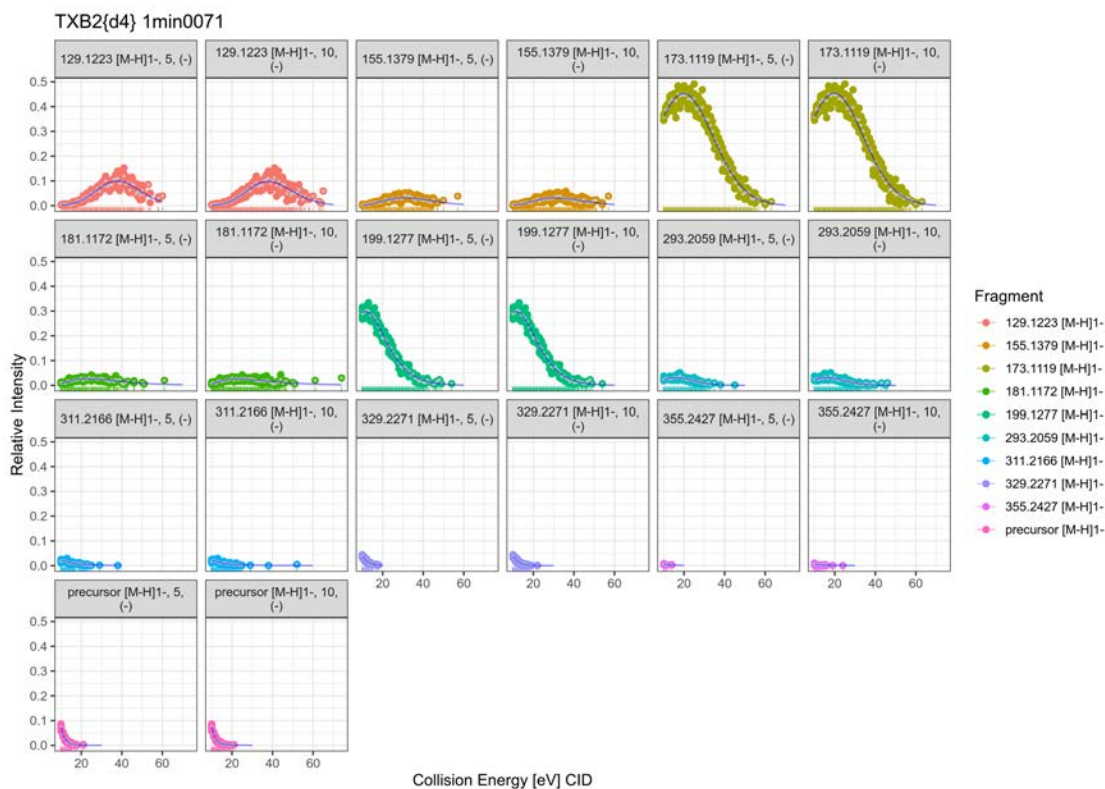

Figure 256. Nonlinear fit

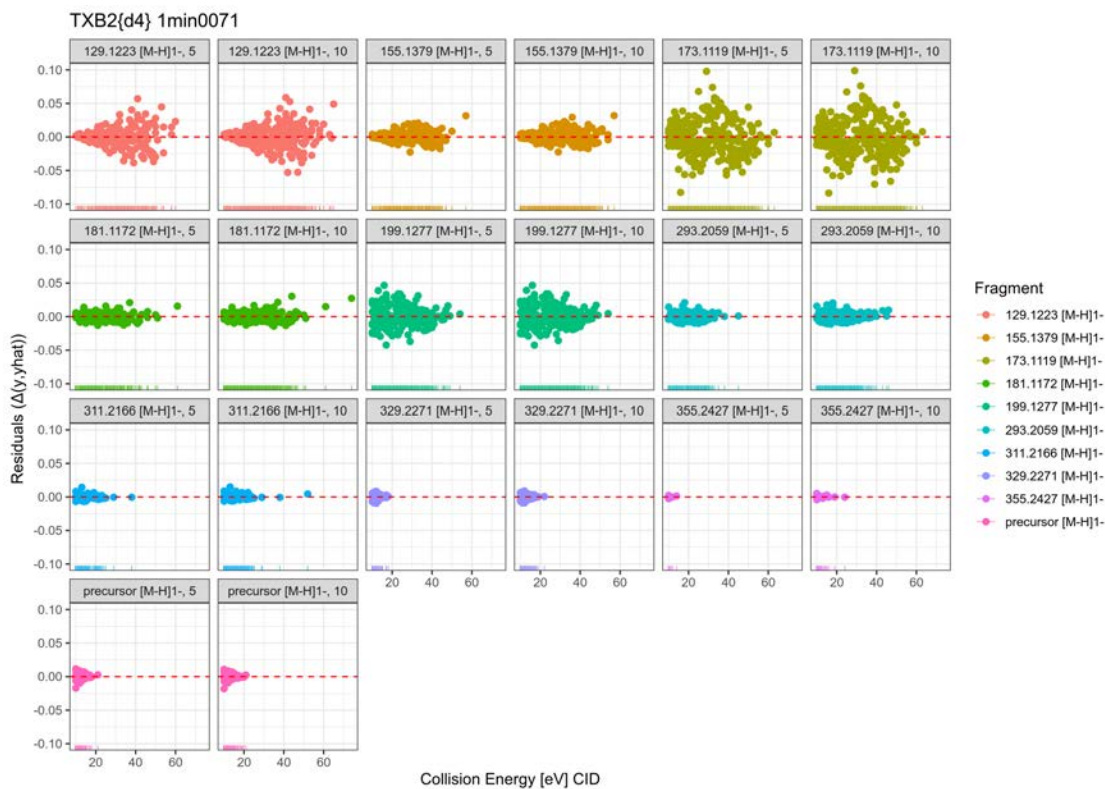

Figure 257. Residuals of nonlinear fit

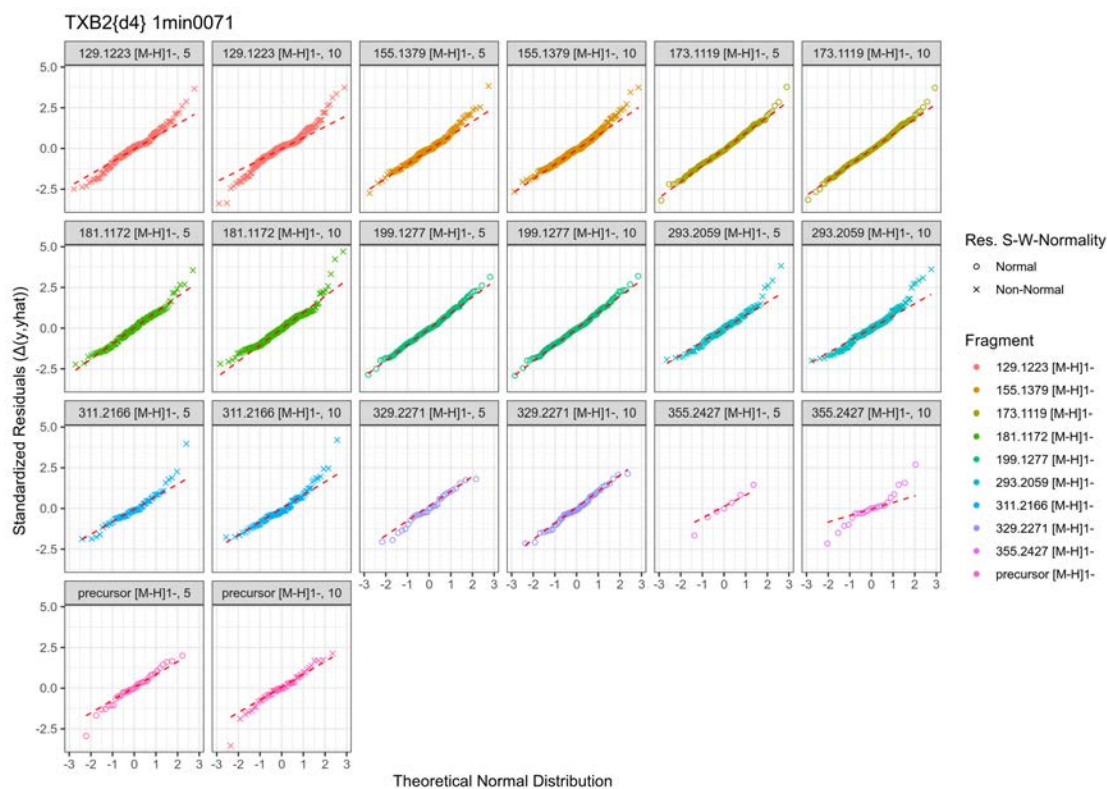

Figure 258. Quantile-quantile plot of residuals

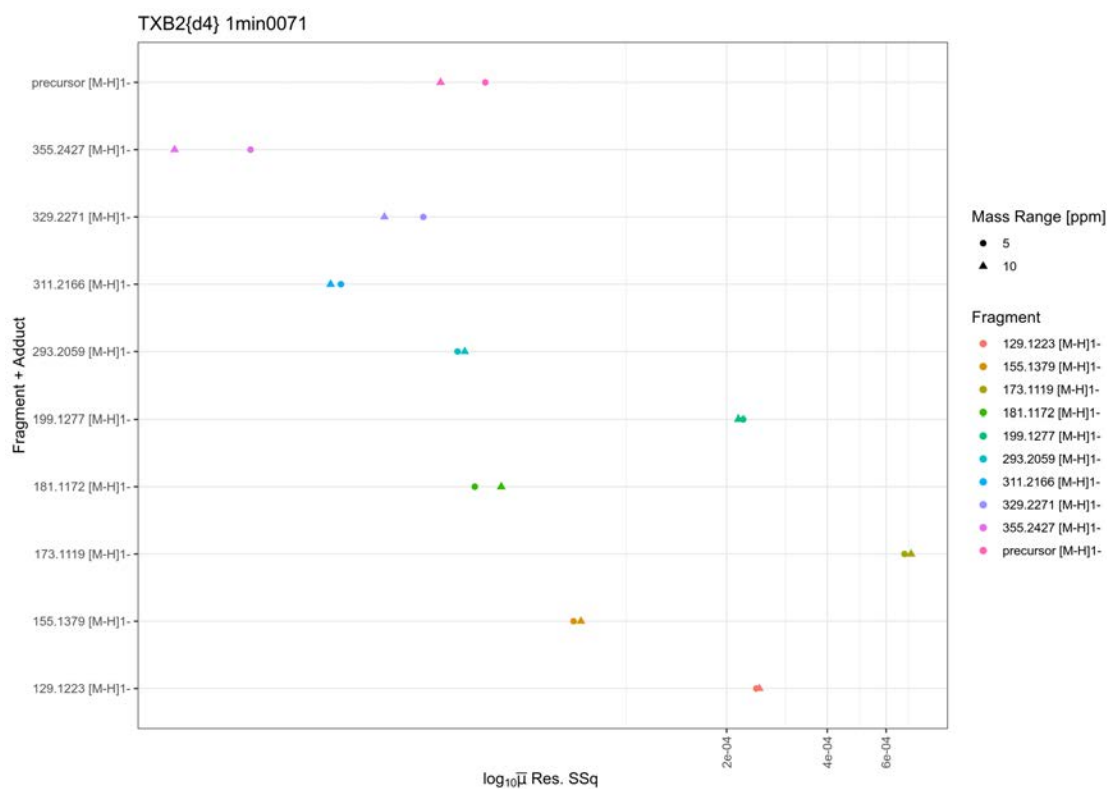

Figure 259. Normalized sum-of-squares of the residuals

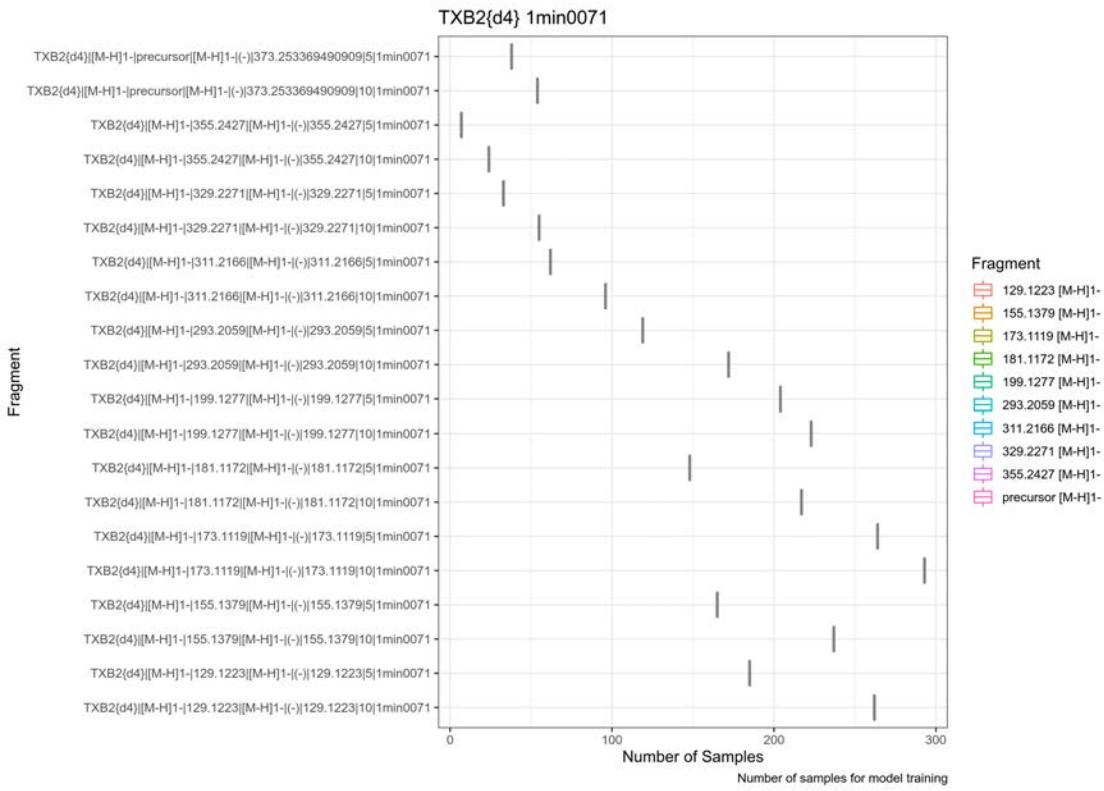

Figure 260. Number of samples used for training per combination Id



# 1.53. TXB3 [M-H]1- 1min0072

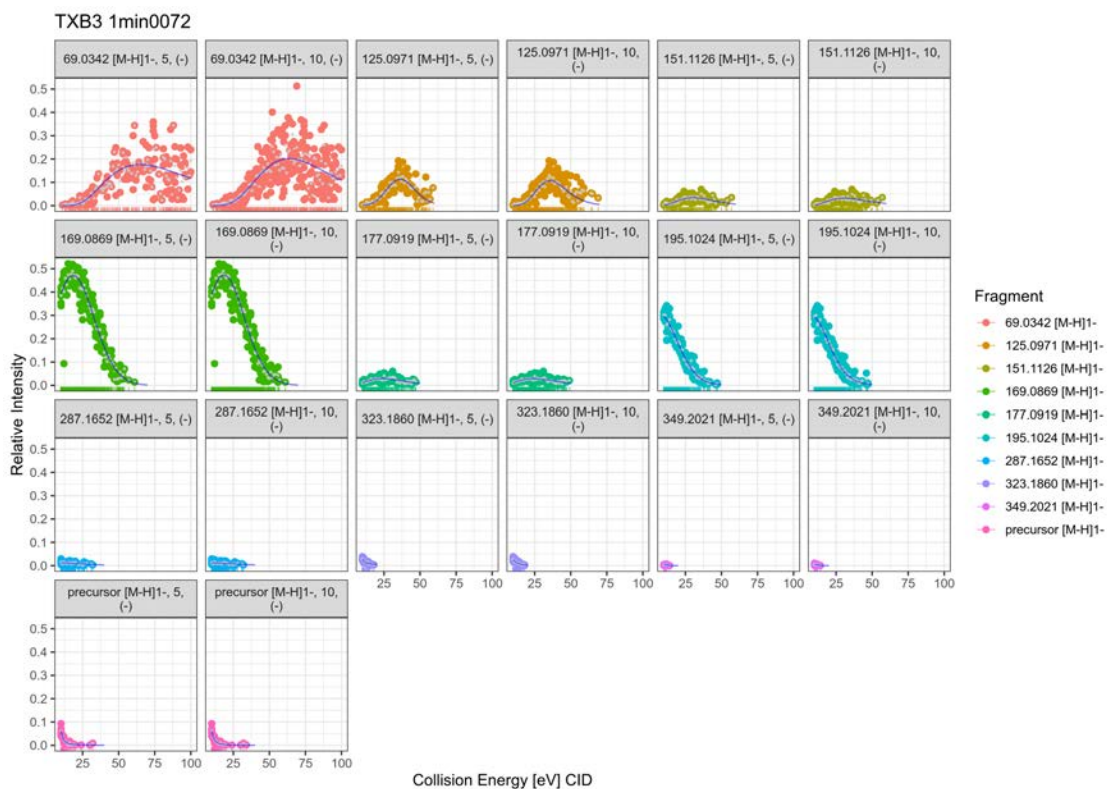

Figure 261. Nonlinear fit

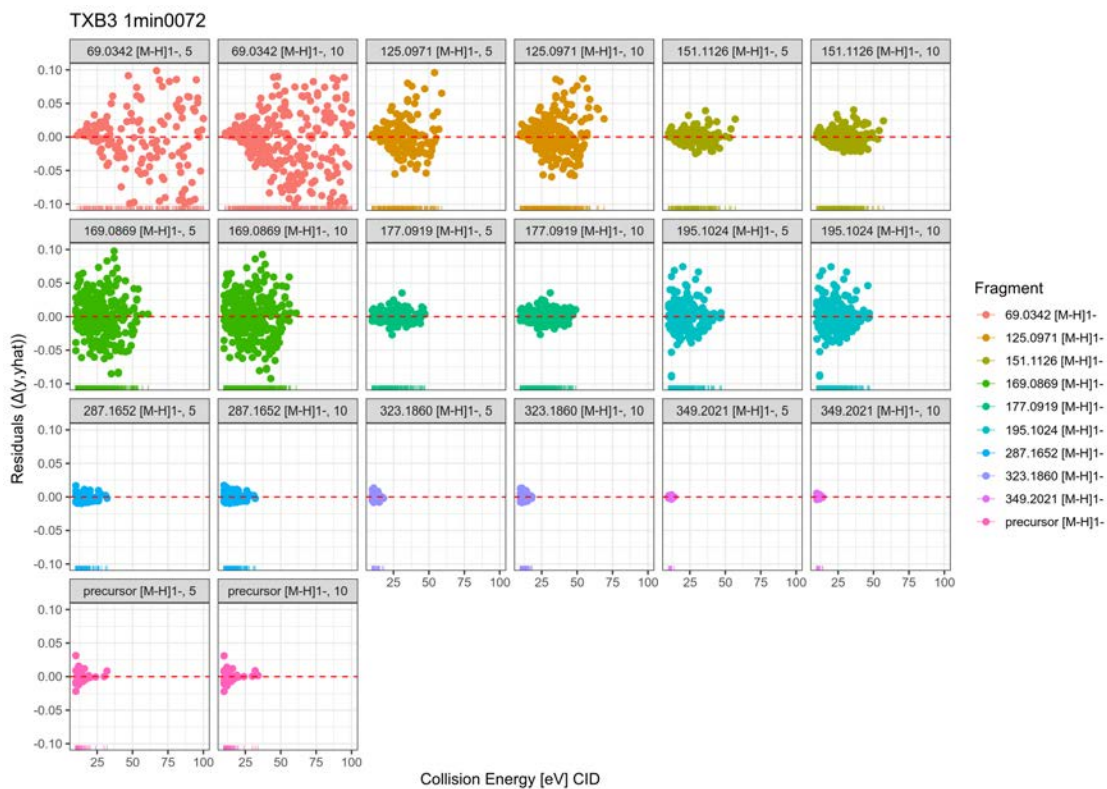

Figure 262. Residuals of nonlinear fit

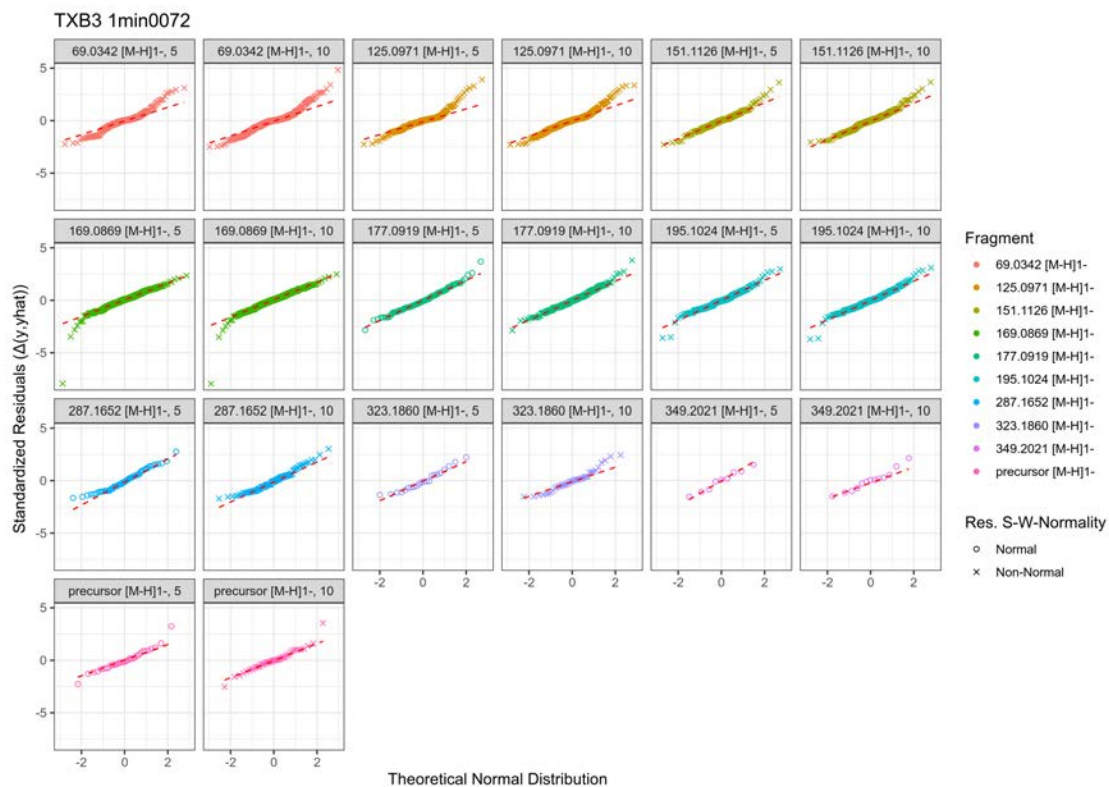

Figure 263. Quantile-quantile plot of residuals

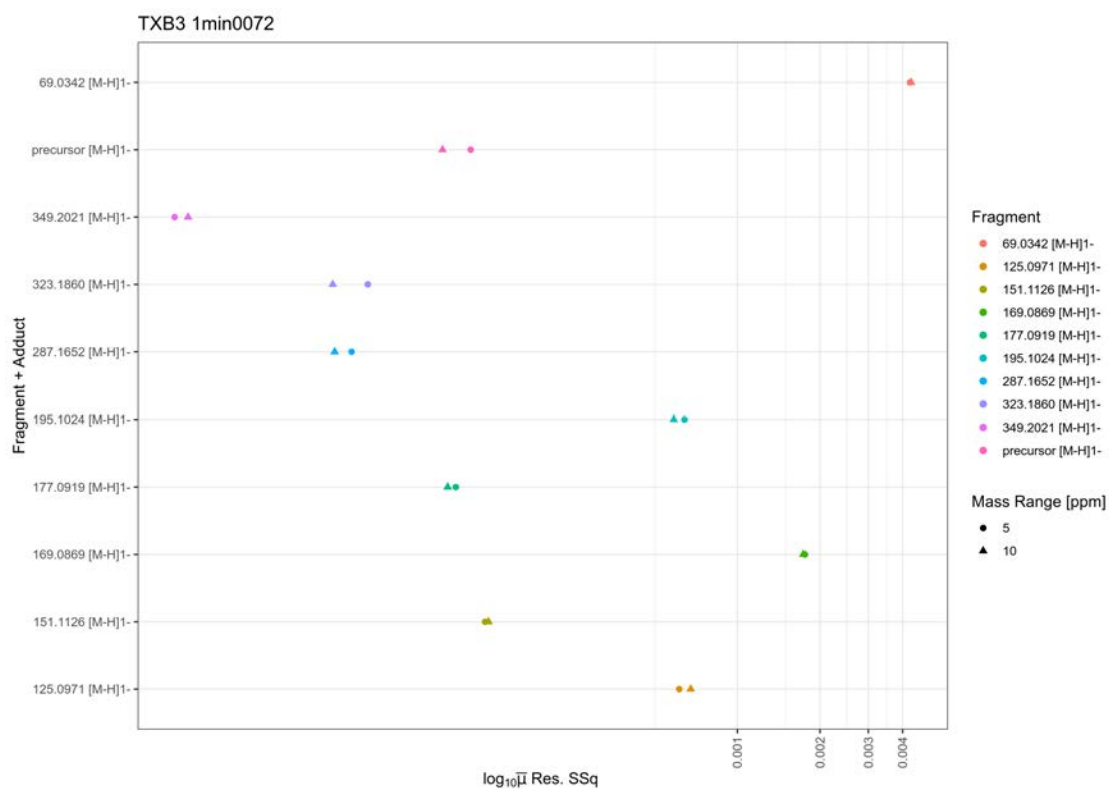

Figure 264. Normalized sum-of-squares of the residuals

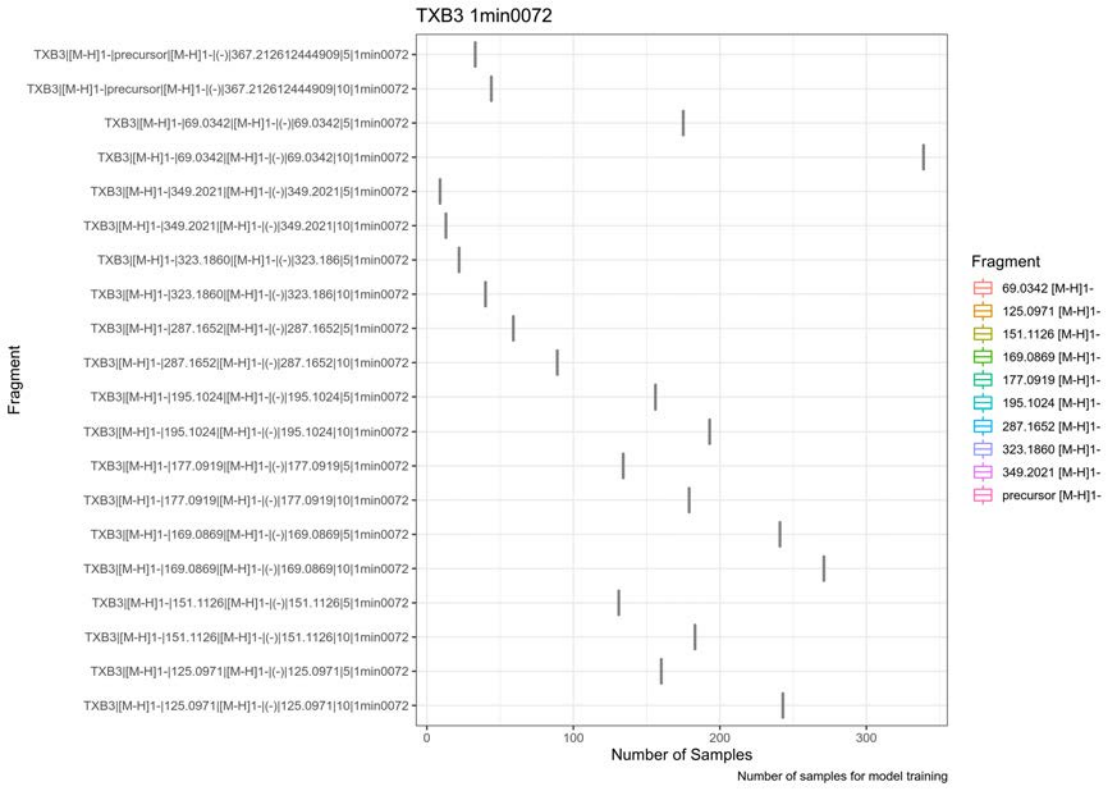

Figure 265. Number of samples used for training per combination Id

# 1.54. alpha-LA{d14} [M-H]1- 1min0201

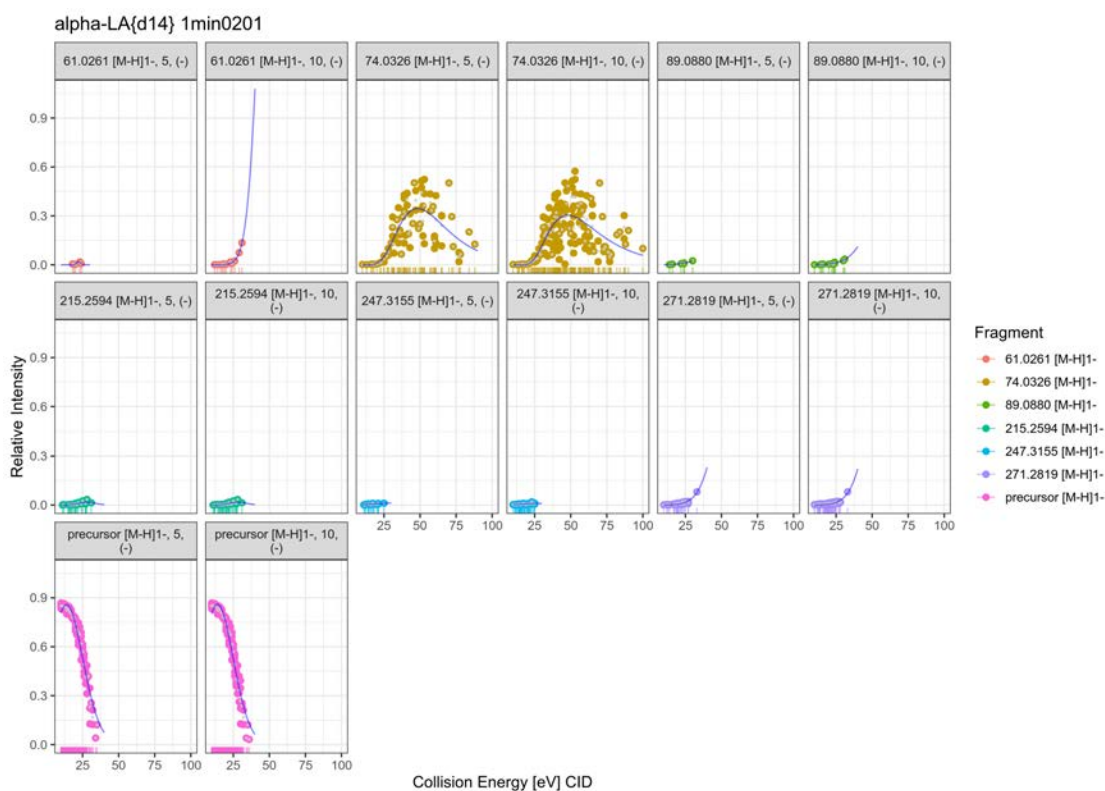

Figure 266. Nonlinear fit

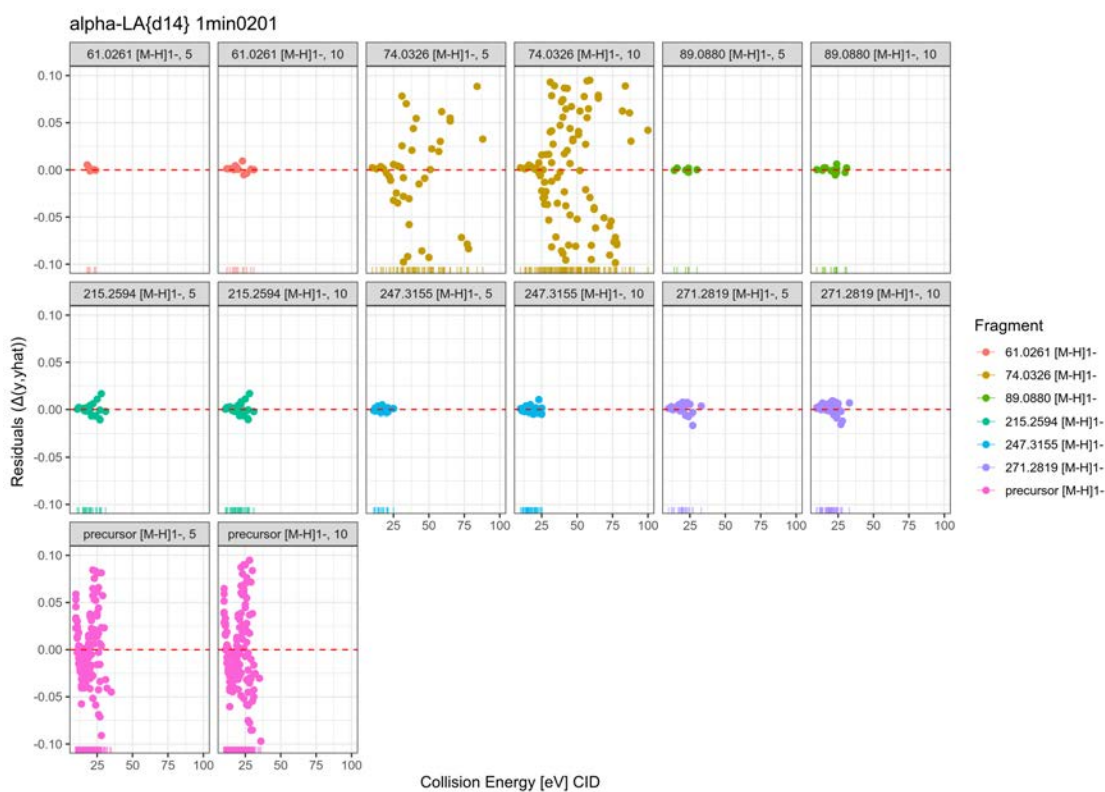

Figure 267. Residuals of nonlinear fit

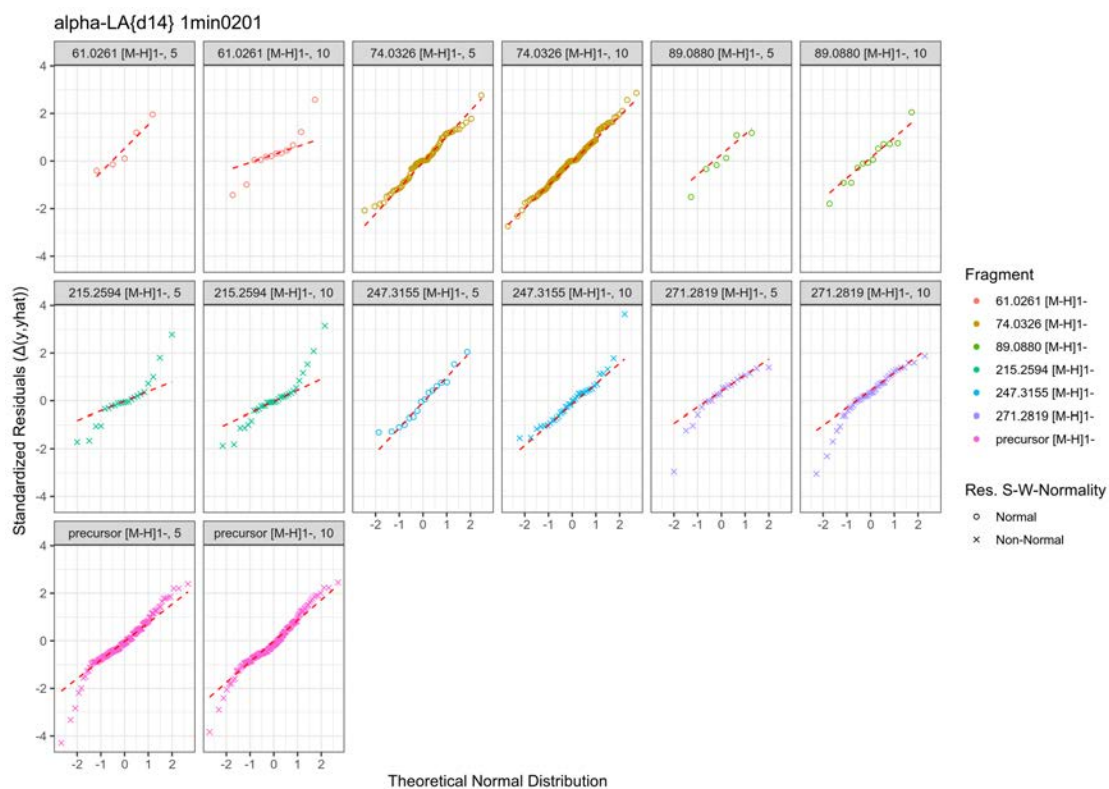

Figure 268. Quantile-quantile plot of residuals

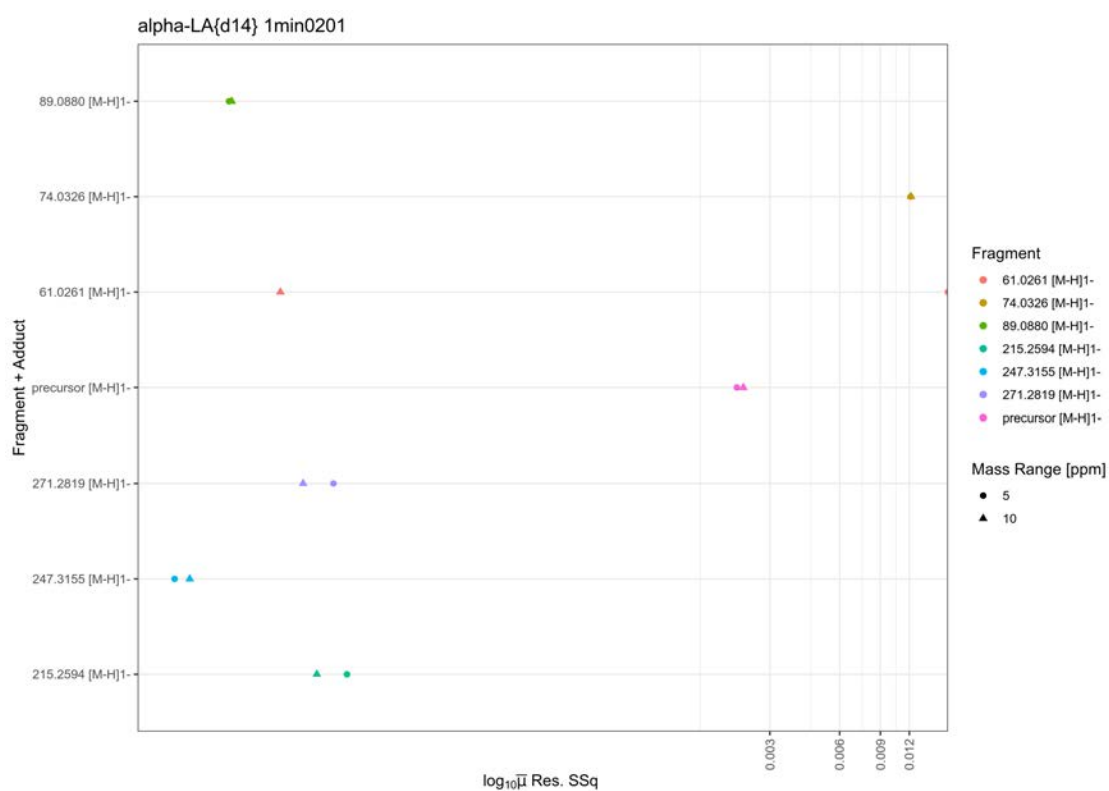

Figure 269. Normalized sum-of-squares of the residuals



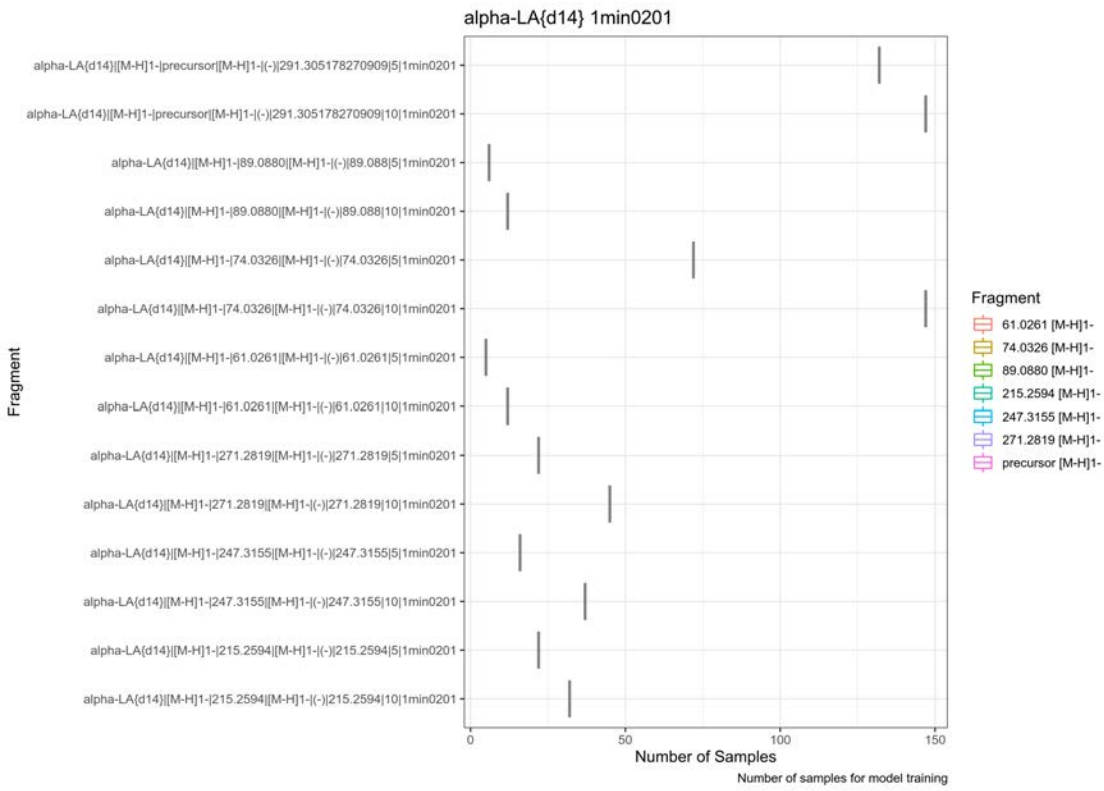

Figure 270. Number of samples used for training per combination Id

# 1.55. tetranor-12-HETE [M-H]1- 1min0069

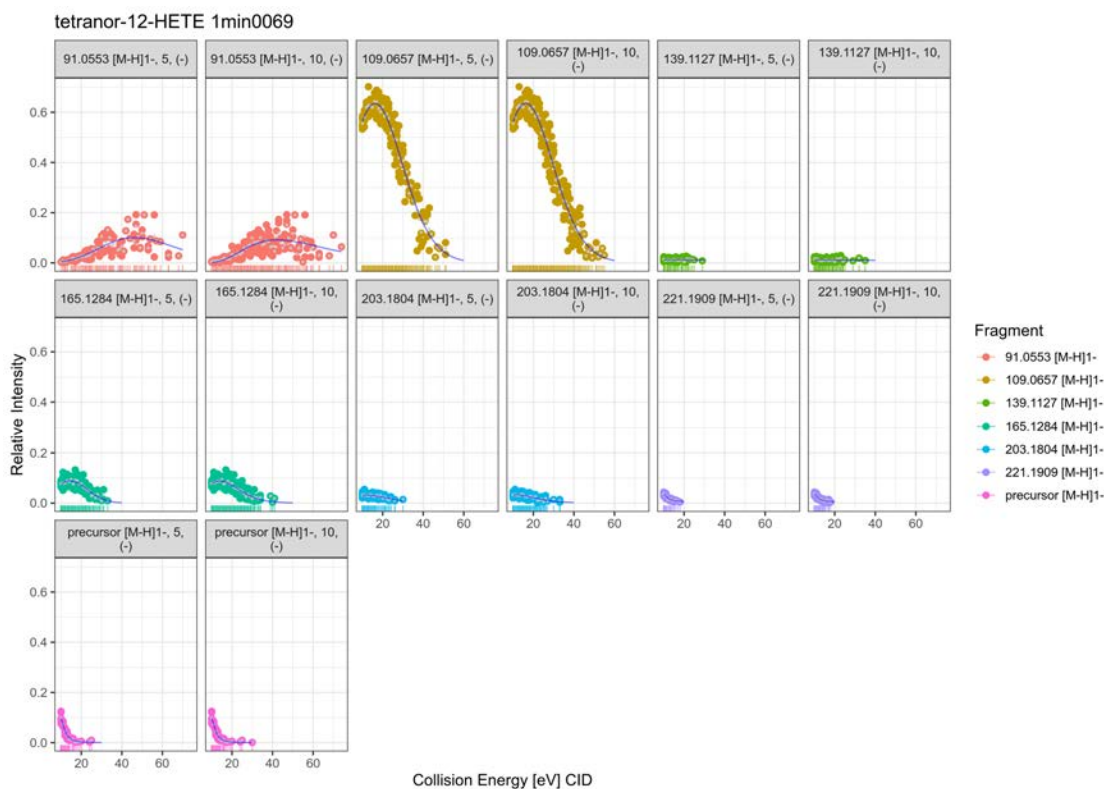

Figure 271. Nonlinear fit

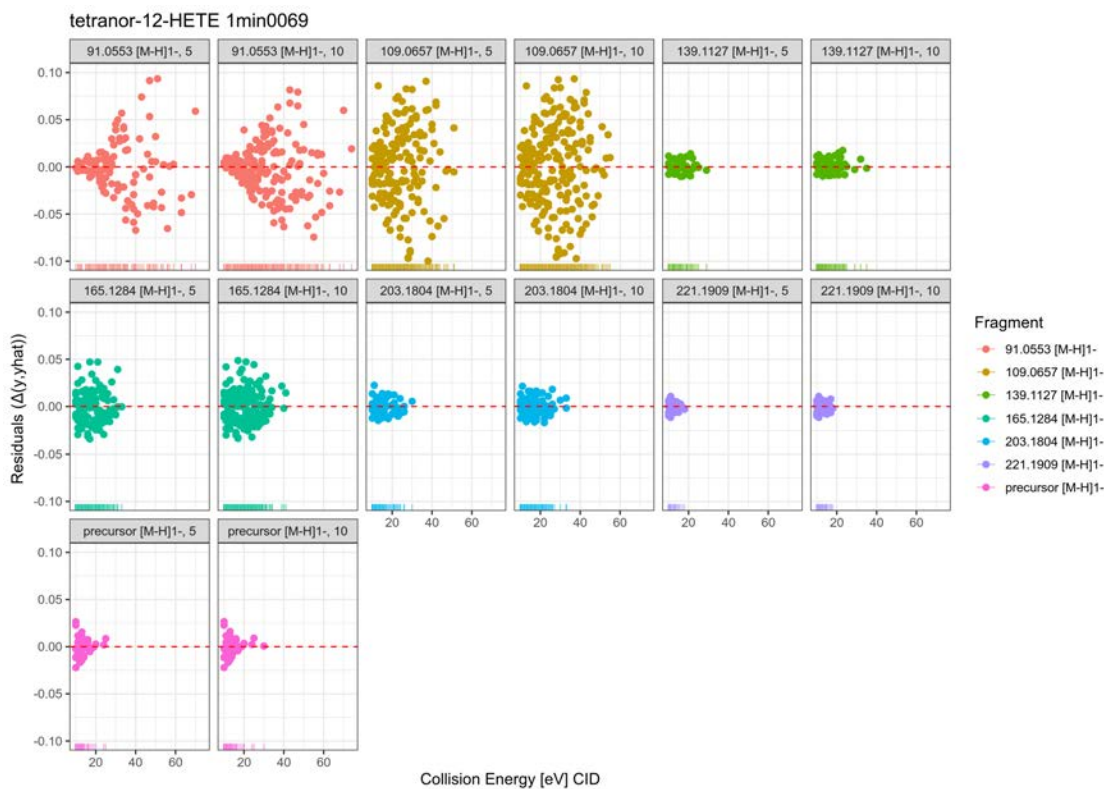

Figure 272. Residuals of nonlinear fit

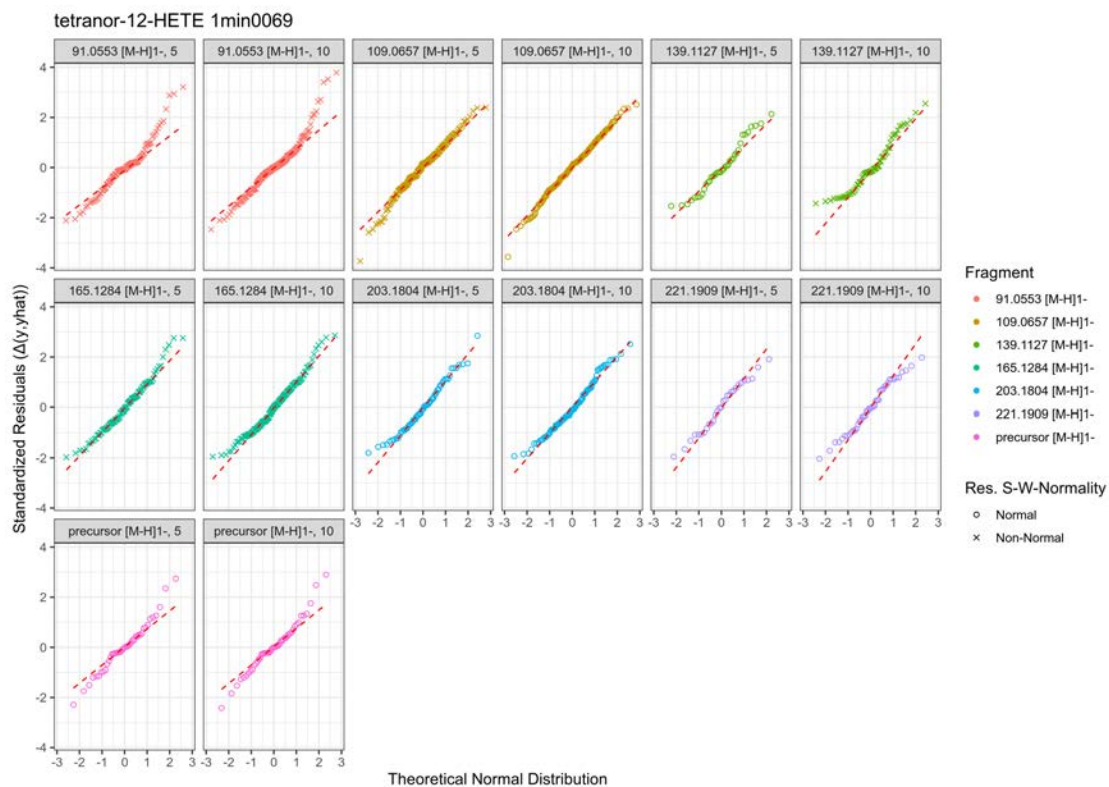

Figure 273. Quantile-quantile plot of residuals

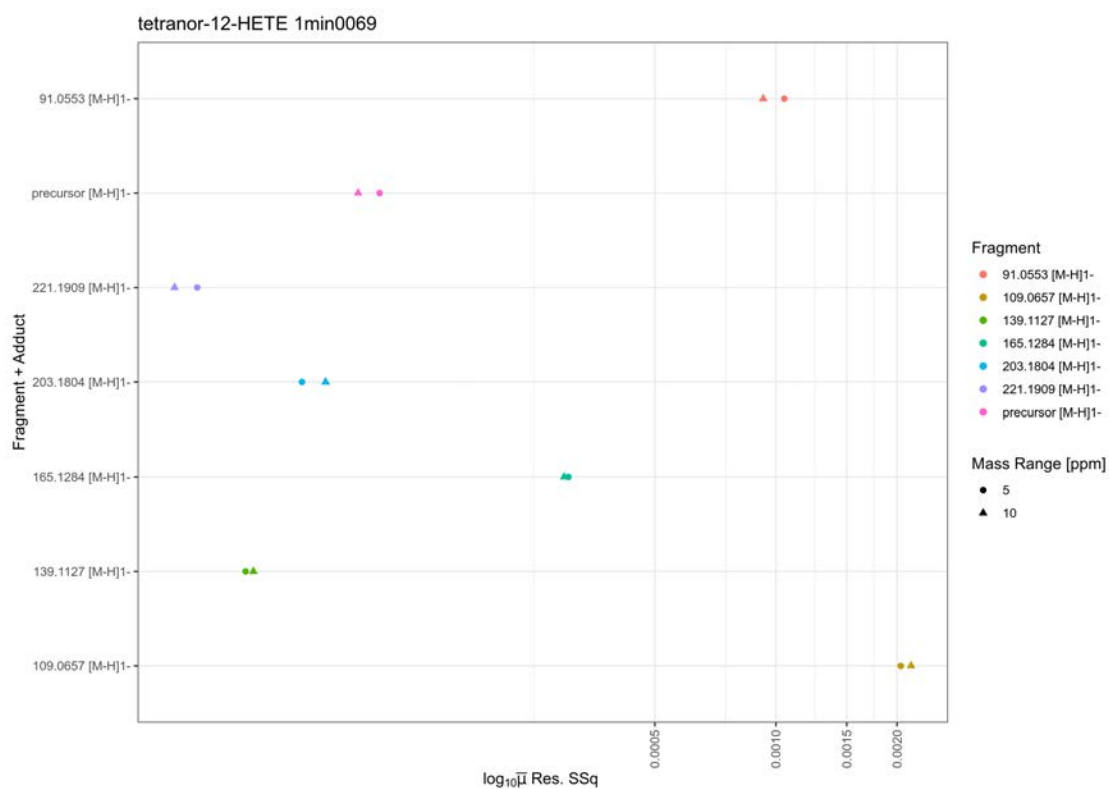

Figure 274. Normalized sum-of-squares of the residuals

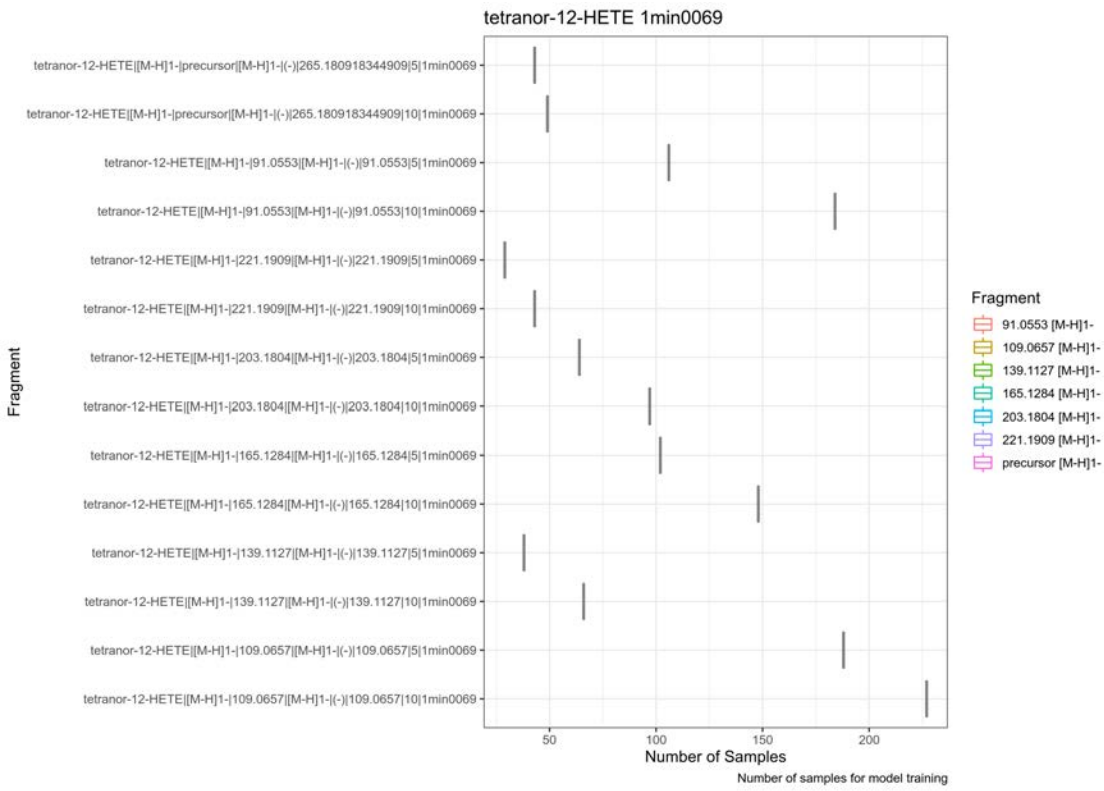

Figure 275. Number of samples used for training per combination Id
